# Supplementary material for: Purine metabolism: a pan-cancer metabolic dysregulation across circulation and tissues
Source: Mol Cancer. 2025 Oct 14;24:255. doi: 10.1186/s12943-025-02482-9 (PMC12522462; doi:10.1186/s12943-025-02482-9)
Supplement: Supplementary file 3 — Supplementary Material 3. [file 12943_2025_2482_MOESM3_ESM.xlsx]

## Sheet: Sheet1
Supplementary Table S29：Multi-omic expression and immune correlation of 33 dysregulated purine metabolism-associated genes across cancers

## Sheet: mRNA expression statistics
The statistical results of purine metabolism-related signatures including 26 upregulated and 7 downregulated genes in pan cancers.
Gene signatures	Gene regulation in cancers vs. normal controls (CA vs. NC)	Count in 17 cancer types (TCGA RNA-Seq datasets)	Count in 14 cancer types (HPA IHC staining)	Count in 10 cancer types (CPTAC MS data)	BLCA				BRCA				CESC				CHOL				COAD				ESCA				HNSC				KIRC				LIHC				LUAD				LUSC				PAAD
					Mean (CA)	Mean (NC)	Log2foldchange	FDR	Mean (CA)	Mean (NC)	Log2foldchange	FDR	Mean (CA)	Mean (NC)	Log2foldchange	FDR	Mean (CA)	Mean (NC)	Log2foldchange	FDR	Mean (CA)	Mean (NC)	Log2foldchange	FDR	Mean (CA)	Mean (NC)	Log2foldchange	FDR	Mean (CA)	Mean (NC)	Log2foldchange	FDR	Mean (CA)	Mean (NC)	Log2foldchange	FDR	Mean (CA)	Mean (NC)	Log2foldchange	FDR	Mean (CA)	Mean (NC)	Log2foldchange	FDR	Mean (CA)	Mean (NC)	Log2foldchange	FDR	Mean (CA)
NME1	Up	16	14	9	1623.35	543.263	1.57925	8.77e-10	1537.06	409.855	1.90699	1.42e-36	1682.34	447	1.91212	0.00630258	873.686	201.444	2.11673	1.27e-05	1320.62	430.049	1.61864	1.62e-19	2300.71	491.308	2.22738	5.99e-09	1159.12	637.659	0.862178	3.35e-09	595.979	357.542	0.737151	2.72e-09	1120.5	328.44	1.77044	1.52e-19	1131.1	183.448	2.62429	2.55e-31	1265	367.471	1.78344	5.47e-23	696.972
RRM2	Up	16	0	9	4997.82	1195	2.06429	7.4e-08	3556.23	340.518	3.38455	2.15e-43	9694.69	180	5.75113	0.00291485	1405.86	54.2222	4.69642	4.92e-06	4775.38	2156.51	1.14692	6.98e-10	8747.65	1564.08	2.48358	8.68e-08	5969.23	2578.41	1.21106	4.38e-11	898.445	216.125	2.05556	2.9e-30	1585.94	136.3	3.54048	5.23e-25	2960.06	228.31	3.69656	3.85e-32	5935.86	475.157	3.64298	1.16e-30	1373.4
PPAT	Up	15	1	5	870.522	393.421	1.14581	2.01e-06	1565.77	784.807	0.996464	5.3e-17	1219.53	445	1.45445	0.02077	461	175.889	1.3901	0.000308571	1027.72	394.854	1.38005	5.18e-10	2049.07	654.231	1.6471	2.61e-07	1132.02	614.159	0.882212	4.19e-09	795.345	832.194	-0.0653395	0.218509	466.537	250.24	0.898678	1.7e-07	1039.58	200.672	2.37309	5.39e-33	1531.72	370.314	2.04833	3.34e-28	594.438
GMPS	Up	14	0	6	4755.93	2741.89	0.794553	0.000156333	6778.75	4145.37	0.709518	3.48e-13	8127.82	3207.67	1.34134	0.0112893	2916.23	762.111	1.93603	4.92e-06	3154.76	2096.07	0.589843	0.000259809	10031.6	3500.85	1.51877	3.99e-07	7098.13	3433.34	1.04783	1.62e-12	3058.12	3455.24	-0.176137	0.00122408	2290.44	1051.76	1.12282	4.53e-15	3713.94	1695.66	1.13111	7.84e-18	8915.11	3139.84	1.50556	1.09e-21	2852.66
IMPDH1	Up	14	5	6	4057.47	2001.42	1.01956	0.000254655	5162.57	2880.77	0.841635	4.03e-19	3407.43	2230	0.611641	0.322196	1801.46	186	3.27579	6.49e-06	3755.92	1574.41	1.25435	1.33e-12	6041.75	3447	0.809626	0.00211124	5545.61	2371.64	1.22546	6.24e-15	1682.83	989.833	0.765634	3.96e-14	761.935	274.38	1.47349	2.38e-05	4107.92	2419.28	0.763831	3.31e-07	5205.11	4257.73	0.289845	0.0834588	2752.71
RRM1	Up	14	3	7	4018.62	2656.79	0.597016	0.0627086	5916.44	3768.28	0.650823	2.46e-09	7829.41	2122.67	1.88303	0.00574824	2629.89	642.556	2.03311	5.65e-06	3284	2927.98	1.22326	0.0288334	7703.72	3032.92	1.34485	8.39e-06	6840.22	4374.77	0.644834	3.32e-06	2606.81	2736.47	-0.0700325	0.673797	1900.22	812.74	1.2253	2.83e-14	3086.06	1349.67	1.19316	4.87e-19	5870.97	2353.33	1.31889	2.15e-18	2267.44
ATIC	Up	13	3	1	4622.92	2953.74	0.646263	0.000679687	7294.64	3959.33	0.881582	2.28e-26	4498.12	3425.67	0.392938	0.506405	5955.29	1164.78	2.35412	6.49e-06	5515.92	3416.76	0.690974	2.08e-05	6465.23	2763.15	1.22639	8.93e-06	4554.58	2704.07	0.752188	6.67e-12	3636.85	4197.99	-0.207007	0.000133212	3646.52	1703.96	1.09763	4.37e-16	5227.71	1640.16	1.67235	1.67e-28	5172.81	3061.31	0.756798	1.69e-10	4098.69
PKM	Up	13	13	5	89237.9	52984.3	0.752092	0.00495368	64733.5	33776.2	0.938506	5.19e-26	116390	40558.3	1.5209	0.00877071	56082.1	1248.44	5.48934	4.92e-06	47879.7	32493.6	0.559257	0.00192238	120628	49192	1.29407	3.56e-05	137570	82657.9	0.734947	2.8e-10	130831	101271	0.369482	9.9e-07	10720.8	1915.62	2.48453	3.44e-11	71733.9	27364.7	1.39034	7.61e-22	114697	51557.1	1.15359	7.75e-18	71861
APRT	Up	13	11	8	6389.99	3725.05	0.778553	0.000283615	4841.29	3180.16	0.606293	1.3e-10	5879.47	4011.67	0.675451	0.0203429	5698.2	2353.67	1.2756	0.000195793	5028.17	4379.66	1.26992	0.0177608	5377.39	3017.31	0.833645	0.000298845	6304.15	5698.64	0.145685	0.445241	4522.53	3320	0.445947	3.87e-09	4791.99	2815.22	0.767376	6.36e-09	5328.19	2442.48	1.1253	1.81e-16	5473.01	4138.63	0.403182	0.000509236	4436.6
DCK	Up	12	0	8	1127.18	667.632	0.75559	0.00181092	1687.66	986.711	0.774328	1.49e-14	1629.17	1070	0.803352	0.0275435	880.286	153.444	2.52026	6.49e-06	1021.37	1155.54	-0.178064	0.0373507	2678.57	1305.85	1.03648	1.88e-05	1219.59	815.455	0.580716	7.42e-05	1324.28	1280.88	0.0480801	0.198132	514.339	225.68	1.18844	1.24e-11	1360.52	876.931	0.633618	2.79e-06	1798.05	1438.18	0.774222	0.0109593	1040.17
ENTPD2	Up	12	8	0	315.793	110.737	1.51184	0.100492	988.835	753.181	0.392734	0.304371	647.111	264.333	1.29166	0.586689	856.857	52.5556	4.02714	1.66e-05	1348.01	1065.44	1.01839	0.00143751	1695.15	1169.69	1.04835	0.0140401	345.282	292.977	0.236985	0.802273	803.936	353.931	1.18361	2.29e-10	252.141	53.6	2.23393	1.65e-10	231.92	58.9655	2.57336	1.18e-13	301.676	67.9412	2.15064	4.92e-09	1149.22
HPRT1	Up	12	12	2	2325	1124.26	1.04825	1.36e-05	2497.35	1089.1	1.19727	1.74e-28	3647.33	1165.33	1.6461	0.00636712	1108.74	864.111	0.359636	0.130285	1896.02	1388.07	0.44989	0.0309964	3726.34	1426.23	1.38555	1.11e-07	2619.55	1214.16	1.10936	4.77e-17	1631.95	2964.47	-0.861174	3.45e-24	1449.42	1264.38	0.903297	0.0331412	1955.1	707.241	1.46697	9.21e-22	3490.33	1241	1.49186	2.52e-22	1688.35
PAICS	Up	12	14	7	7769.87	3306.95	1.23239	1.5e-07	11610.3	5572.34	1.05906	6.5e-23	8962.61	3464.67	1.3712	0.0125354	4665.2	3901.11	0.258054	0.244493	8555.8	4314.73	0.987632	1.07e-06	12888.8	4247.69	1.60137	6.15e-07	8797.85	5368.11	0.712735	1.3e-07	5827.29	6396.69	-0.134501	0.0326244	6244.91	4893.22	0.351897	0.0123525	6992.65	1384.62	2.33635	2.55e-33	10810.4	2714.78	1.9935	5.88e-27	4333.97
UCK2	Up	12	0	5	1761.76	746.211	1.23936	2.43e-06	2659.79	2156.36	0.302715	0.033335	2816.74	1009	1.4811	0.0100563	1737.51	133.333	3.70392	4.92e-06	1824.28	2332.63	-0.354632	0.00166795	3029.74	1903.54	0.67051	0.000944729	2341.96	1939.18	0.272268	0.101809	960.287	737.417	0.380986	0.000167416	1147.87	206.64	2.47377	1.09e-26	1074.46	377.672	1.5084	6.73e-11	2574.64	766.373	1.74825	4.89e-23	1405.92
DGUOK	Up	11	5	0	1958.26	1152.32	0.765037	2.22e-05	1636.68	1122.19	0.544448	2.35e-14	1826.83	1811.33	0.0122885	0.679781	1425.37	468.444	1.60539	1.66e-05	1207.12	1232	0.698094	0.0203219	1818.86	749.077	1.27985	7.06e-08	1522.64	911.295	0.740587	6.37e-13	1217.63	1001.31	0.282196	2.22e-06	916.352	609.84	0.587472	1.44e-07	1433.34	731.103	0.971235	6.58e-17	2071.4	1254.82	0.723123	4.58e-13	1379.97
GART	Up	11	10	7	4337.3	2458.11	0.81925	6.61e-05	5225.19	3652.2	0.516715	2.77e-08	5427.89	2199.67	1.30311	0.0110749	2711.49	1016.33	1.41571	2.79e-05	4096.43	2638.44	0.634681	0.000106036	7331.52	3570.15	1.03813	1.16e-05	5435.31	3755.91	0.5332	1.84e-05	2623.78	3261.93	-0.31408	6.76e-06	2087.85	1359.94	0.618472	2.1e-06	3867.69	1490.17	1.37599	1.07e-24	5283.43	2854.94	0.888013	3.25e-13	2866.9
NUDT5	Up	11	0	4	2978.48	1358.63	1.13242	8.54e-07	3387.95	2084.69	0.700582	1.24e-13	3428.66	971.667	1.81911	0.00354349	2312.4	1727.33	0.420844	0.0478713	2246.4	1660.22	0.436241	0.0077454	4026.22	1772.54	1.18361	3.45e-06	2648.75	1756	0.59302	5.48e-07	2371.38	2852.75	-0.266628	5.61e-06	3436.58	2062.16	0.736818	7.79e-11	2842.98	1521.22	0.902174	6.81e-13	2731.02	2651.12	0.772382	0.00319623	1664.2
TXN	Up	11	12	0	12711.8	7934.74	0.679914	0.00148843	10607.3	5294.82	1.0024	7.25e-26	21362.4	6677	1.6778	0.0128958	6826.49	3878.67	0.815582	0.00272777	12495.3	13489.9	-0.110488	0.0208396	25183.2	9426.69	1.41764	1.97e-05	20403.2	32503.1	-0.67178	0.00202824	7260.74	6789.31	0.0968528	0.765895	14618.1	6502.54	1.16868	1.03e-13	10612.8	4492.1	1.24034	4.78e-15	18381.8	7263.96	1.33945	1.74e-10	8627.1
TYMP	Up	11	2	5	6894.11	1849.95	1.89788	0.000397225	5155.65	1561.1	1.72359	7.01e-30	14522.5	715.333	4.34353	0.00411521	4125.34	1252.22	1.72002	0.00137175	1772.93	1819.02	-0.0370318	0.221597	11489.4	1382.46	3.05499	5.08e-08	19455.4	6854.73	1.505	9.91e-14	5114	714.167	2.84012	1.11e-36	4162.35	2187.12	0.928365	5.11e-05	6305.32	2872.66	1.13418	1.03e-11	8109.93	6594.08	0.298518	0.152426	4421.53
ADA	Up	10	0	3	823.463	362.211	1.18488	0.0121051	481.649	356.41	0.434445	0.000105387	1133.33	325.333	1.80058	0.0775392	332.771	84	1.98607	2.15e-05	401.333	241.634	0.731977	0.0016489	1239.73	1068.85	0.21397	0.432323	1488.57	442.727	1.74943	5.04e-18	702.931	169.625	2.05103	1.58e-31	335.214	132.34	1.34083	1.66e-14	426.485	171.345	1.31559	1.88e-13	1397.34	439.471	1.66884	1.14e-15	542.691
HK2	Up	10	6	6	6032.78	3699.84	0.705359	0.0393083	7316.72	7097.65	0.043855	0.718875	8317.18	375.333	4.46985	0.0031121	1235.49	75.5556	4.0314	6.31e-05	6201.38	18853.6	-1.60418	6.33e-15	12902.2	4782.62	1.43175	0.000431312	11352.2	8282.2	0.454888	0.0420131	6244.74	618.653	3.33544	1.6e-35	628.295	143.52	2.13019	0.276205	4497.37	3852.55	0.223267	0.192664	11845	6310.96	0.908345	2.5e-05	5540.07
HKDC1	Up	10	1	5	162.32	52.6842	1.6234	0.0177109	count < 50	count < 50	count < 50	count < 50	407.696	71.3333	2.51485	0.895868	6099.86	191.333	4.99462	1.12e-05	2898.93	2463.98	0.234531	0.0475208	2366.73	760.769	1.97426	0.0295101	245.654	65.5	3.98629	1.57e-11	2151.13	1594.78	0.43174	0.126183	1970.25	459.6	2.09993	7e-10	1136.99	252.517	2.17077	2.48e-13	265.557	514	-0.952745	1.49e-16	2419.9
PDE7A	Up	10	1	0	2121.55	1169.32	0.859455	0.00191955	2986.91	2213.57	0.432279	0.00264446	2376.47	719.333	1.72409	0.00763383	2155.26	181.556	3.56938	1.27e-05	912.31	622.024	0.552552	0.033417	3674.42	2157.77	1.11428	0.00561794	2048.21	852.591	1.26444	2.39e-13	2447.07	1113.22	1.13631	4.92e-19	519.55	232.26	1.16152	6.99e-11	1674.5	1070.26	0.645773	2.99e-07	2427.95	1802.25	0.429934	0.0453717	1509.46
ADCY3	Up	9	3	1	1223.84	1011.95	0.274286	0.668615	1618.89	2286.64	-0.498224	4.64e-13	1962.52	2661.67	-0.439622	0.302904	705.6	105.778	2.73781	1.66e-05	1534.1	919.39	0.738646	0.0001421	1267.29	986.69	0.361078	0.0603827	4425.43	2096.77	1.07765	0.000203109	2371.57	1315.8	0.849904	8.19e-07	1800.67	1036.53	0.796776	1.85e-10	229.42	134.52	0.770171	0.0384991	2774.23	2323.63	0.255708	0.0278127	1234.17
AMPD2	Up	9	2	6	2200.57	1421.32	0.630649	0.000744066	1893.07	1426.49	0.408257	3.54e-07	1674.71	2551.33	-0.607338	0.0362591	2557.31	1099.89	1.21727	2.16e-05	1902.37	1115.59	0.769994	7.51e-07	3291.18	1921.54	0.776345	0.00272948	1832.13	1240.84	0.562205	6.27e-07	2640.15	2359.83	0.161934	0.00110932	2231.16	1364.78	0.709124	9.6e-08	1933.33	952.897	1.02069	4.12e-16	2202.8	1989.08	0.147239	0.0499568	2658.25
NT5C3A	Up	9	14	4	1662.33	1046.68	0.667376	0.000831077	1960.31	1283.27	0.611265	5.87e-12	1926.3	1344	0.5193	0.287426	1496.03	231	2.69517	4.92e-06	1922.79	2998.02	-0.640813	5.99e-07	3708.78	1573.54	1.23693	7.9e-05	1921.83	1643.39	0.225807	0.0749851	2176.13	1255.67	0.793312	3e-17	719.805	375.96	0.937027	1.76e-11	1663.06	820.19	1.01981	3.12e-16	1588.21	1399.27	0.18272	0.472576	1942.57
NPR1	Down	13	0	3	383.369	1201.26	-1.64774	1.71e-08	603.477	6828.35	-3.50017	2.74e-45	510.125	5880	-3.52689	0.00457293	468.057	332.222	0.494536	0.748911	156.086	634.878	-2.02414	8.24e-20	454.763	1563.23	-1.78134	0.0402458	299.575	493.023	-0.718738	0.00356867	3616.36	6502.28	-0.846408	2.87e-19	509.493	500.82	0.0247708	0.150629	709.945	3211.79	-2.1776	1.29e-29	348.006	6265.51	-4.17025	1.01e-31	666.275
PDE2A	Down	13	14	6	350.786	1696.89	-2.27424	8.68e-12	487.794	3806.58	-2.96415	1.17e-46	177.199	4594.67	-4.69652	0.00291436	406.6	601.111	-0.564021	0.00570812	123.733	853.756	-2.78659	2.1e-23	515.798	1511.31	-1.55092	0.011429	337.472	559.5	-0.729371	0.00102704	2190.28	2413.33	-0.139915	0.00034291	388.886	821.36	-1.07867	2.57e-14	295.641	774.379	-1.38919	6e-16	220.873	1698.1	-2.94263	3.74e-29	538.466
PDE7B	Down	12	13	0	277.665	842	-1.60047	5.2e-08	197.848	551.096	-1.47791	1.78e-33	111.486	1911.33	-4.09964	0.00411384	252.629	188.556	0.422028	0.0667885	289.375	564.619	-0.964339	0.0368971	238.335	560.308	-1.23323	0.00851824	129.445	202.591	-0.646234	0.43201	841.981	1668.79	-0.986944	4.12e-21	121.033	273.02	-1.17361	3.68e-16	181.361	214.103	-0.239446	7e-05	140.531	405.863	-1.5301	6.54e-20	235.27
ADCY5	Down	11	11	1	399.478	3299.79	-3.04619	2.62e-11	1183.92	2443.37	-1.04531	1.04e-23	330.628	2569.67	-2.9583	0.00447679	1247.14	255.333	2.28817	0.0104545	176.972	1495.02	-3.07858	9.46e-24	1109.05	9380.62	-3.08036	0.0219298	235.12	371	-0.65802	2.27e-09	4128.77	3731.12	0.146101	0.350948	300.247	269.7	0.154792	0.000227794	442.519	300.655	0.55763	0.000377682	523.034	681.451	-0.381705	1.24e-07	988.101
ACADM	Down	10	4	5	2141.23	2760.21	-0.366341	0.0155527	3157.09	4722.57	-0.580978	4.07e-09	2634.47	2406.67	0.130478	0.91981	2689.66	6910.44	-1.36136	5.25e-05	1459.47	4378.51	-1.585	1.17e-21	2972.79	3574.92	-0.773261	0.0072686	1757.85	3941.95	-1.1651	3.88e-12	4938.47	14655.2	-1.56928	2.57e-31	5032.99	8523.08	-0.759958	2.28e-11	2502.11	1932.33	0.372806	0.0156303	2030.71	3014.41	-0.569891	3.85e-12	1697.99
PDE3A	Down	9	12	5	245.764	518.421	-1.07685	5.46e-06	632.346	1107.52	-0.808545	6e-11	584.162	1938	-1.73013	0.00894386	817.657	145.222	2.49323	7.58e-05	920.656	3987.88	-2.11489	2.19e-22	1659.97	6049.46	0.666	0.0940103	351.769	205.818	0.773258	6.12e-05	2215.39	2130.76	0.0561889	0.72216	395.144	195.04	1.01861	0.760453	1183.56	520.845	0.816411	0.00289492	525.002	1060.08	-1.01378	2.33e-17	1457.58
PDE5A	Down	9	3	8	655.15	2959	-2.17521	3.47e-08	1747.08	2858.41	-0.710264	1.5e-21	733.574	1932.33	-1.39733	0.0079442	1669.4	109.444	3.93106	2.16e-05	732.082	2943.07	-2.00725	4.21e-22	2848.41	10899.7	-1.93606	0.576706	510.92	648.659	-0.344362	0.0799633	1973.03	2031.78	-0.0423311	0.197257	216.051	98.36	1.13523	0.00308971	897.204	2278.05	-1.34429	2.4e-21	879.839	4085.49	-2.2152	3.12e-28	1609.56
TCGA, The Cancer Genome Atlas; HPA, Human Protein Atlas; IHC, immunohistochemical staining; CPTAC, Clinical Proteomic Tumor Analysis Consortium; MS, mass spectrometry.
[truncated: 23 more columns]

## Sheet: protein levels validation (IHC)
Staining profiles for proteins in 14 cancer types based on immunohistochemistry using tissue microarrays. This table includes the number of patients annotated for different staining levels ("High", "Medium", "Low" and "Not detected"). The data is based on HPA (The Human Protein Atlas) database.
Gene signatures	Gene regulation in cancers vs. normal controls (CA vs. NC)	Count in 17 cancer types (TCGA RNA-Seq datasets)	Count in 14 cancer types (HPA IHC staining)	Count in 10 cancer types (CPTAC MS data)	breast cancer							cervical cancer							colorectal cancer							endometrial cancer							head and neck cancer							liver cancer							lung cancer
					High	Medium	Low	Not detected	high + medium	all	Patients(%) (high+medium)/all	High	Medium	Low	Not detected	high + medium	all	Patients(%) (high+medium)/all	High	Medium	Low	Not detected	high + medium	all	Patients(%) (high+medium)/all	High	Medium	Low	Not detected	high + medium	all	Patients(%) (high+medium)/all	High	Medium	Low	Not detected	high + medium	all	Patients(%) (high+medium)/all	High	Medium	Low	Not detected	high + medium	all	Patients(%) (high+medium)/all	High	Medium	Low
NME1	Up	16	14	9	4	7	0	0	11	11	0.416667	0	6	2	4	6	12	0	3	9	0	0	12	12	0.0909091	0	11	1	0	11	12	0.583333	0	4	0	0	4	4	0.7	2	6	1	3	8	12	0.272727	0	8	3
RRM2	Up	16	0	9	0	0	4	8	0	12	1	0	0	2	10	0	12	0	0	2	6	4	2	12	0	0	0	0	12	0	12	1	0	0	0	3	0	3	0.5	0	2	0	8	2	10	0.666667	0	0	3
PPAT	Up	15	1	5	0	1	4	6	1	11	0.0833333	0	1	2	7	1	10	0.555556	0	9	1	1	9	11	0	0	1	2	8	1	11	0.0833333	0	1	0	3	1	4	0.454545	0	0	2	10	0	12	0	0	2	4
GMPS	Up	14	0	6	NS	NS	NS	NS	NS	NS	NS	NS	NS	NS	NS	NS	NS	NS	NS	NS	NS	NS	NS	NS	NS	NS	NS	NS	NS	NS	NS	NS	NS	NS	NS	NS	NS	NS	NS	NS	NS	NS	NS	NS	NS	NS	NS	NS	NS
IMPDH1	Up	14	5	6	0	3	8	0	3	11	1	0	3	7	2	3	12	0	0	7	1	3	7	11	1	0	6	5	1	6	12	0	0	0	2	2	0	4	0.0833333	0	1	8	3	1	12	0.25	1	8	2
RRM1	Up	14	3	7	0	6	6	0	6	12	0	0	2	4	6	2	12	0	3	4	3	1	7	11	1	0	3	2	7	3	12	0.25	0	2	0	2	2	4	1	1	0	2	9	1	12	0.75	0	2	1
ATIC	Up	13	3	1	4	8	0	0	12	12	0.727273	2	6	3	1	8	12	0.818182	7	5	0	0	12	12	0.636364	2	6	2	2	8	12	0.166667	0	2	0	1	2	3	0.909091	3	7	2	0	10	12	0.333333	1	5	3
PKM	Up	13	13	5	2	6	2	2	8	12	0.909091	3	7	1	1	10	12	0	2	6	2	1	8	11	0.5	6	5	1	0	11	12	0.2	1	3	0	0	4	4	0.727273	0	3	2	6	3	11	0.5	2	2	3
APRT	Up	13	11	8	0	7	2	3	7	12	0.909091	0	1	7	4	1	12	0.833333	0	2	5	5	2	12	0.166667	0	2	10	0	2	12	0.727273	0	0	1	3	0	4	0.636364	0	5	5	1	5	11	1	0	2	5
DCK	Up	12	0	8	0	2	4	5	2	11	0.272727	0	2	5	5	2	12	0.666667	0	0	4	7	0	11	0.818182	0	0	1	9	0	10	0.5	0	0	1	2	0	3	0.0833333	0	0	0	7	0	7	0.583333	0	0	1
ENTPD2	Up	12	8	0	0	5	6	1	5	12	0.666667	0	3	5	4	3	12	0	0	7	5	0	7	12	0	0	8	4	0	8	12	1	1	3	0	0	4	4	1	1	6	4	1	7	12	0.25	1	4	2
HPRT1	Up	12	12	2	4	3	5	0	7	12	0.0833333	8	3	1	0	11	12	0.25	5	3	3	0	8	11	0.0833333	0	7	3	2	7	12	0.166667	3	1	0	0	4	4	0.6	0	8	3	0	8	11	0	6	5	1
PAICS	Up	12	14	7	10	0	0	0	10	10	0.363636	7	5	0	0	12	12	0.636364	10	1	0	0	11	11	0	9	2	0	0	11	11	1	3	1	0	0	4	4	0.818182	7	4	0	0	11	11	0.0909091	8	2	0
UCK2	Up	12	0	5	NS	NS	NS	NS	NS	NS	NS	NS	NS	NS	NS	NS	NS	NS	NS	NS	NS	NS	NS	NS	NS	NS	NS	NS	NS	NS	NS	NS	NS	NS	NS	NS	NS	NS	NS	NS	NS	NS	NS	NS	NS	NS	NS	NS	NS
DGUOK	Up	11	5	0	1	5	3	0	6	9	0	0	1	2	9	1	12	0	1	8	1	1	9	11	0.916667	1	2	3	5	3	11	0.0909091	0	0	0	4	0	4	0.25	0	4	5	0	4	9	0	0	0	2
GART	Up	11	10	7	1	6	5	0	7	12	0	1	11	0	0	12	12	0.666667	4	6	1	0	10	11	0	1	8	2	0	9	11	0.25	2	2	0	0	4	4	1	3	2	3	4	5	12	0.25	2	8	2
NUDT5	Up	11	0	4	0	3	1	7	3	11	0	0	1	2	8	1	11	0.0833333	0	1	4	6	1	11	0.5	0	1	4	7	1	12	0	0	0	2	1	0	3	0	0	5	3	4	5	12	0.272727	0	0	0
TXN	Up	11	12	0	0	9	2	0	9	11	0	0	6	2	2	6	10	0	0	10	1	0	10	11	0.454545	0	6	4	1	6	11	0.363636	1	2	1	0	3	4	0.545455	0	4	3	3	4	10	0.166667	0	6	4
TYMP	Up	11	2	5	2	3	2	4	5	11	0.818182	2	5	2	3	7	12	0.0833333	2	2	4	4	4	12	1	0	1	5	6	1	12	0	2	2	0	0	4	4	0.0909091	0	4	5	3	4	12	0.181818	0	0	6
ADA	Up	10	0	3	0	0	1	9	0	10	0.272727	0	0	1	10	0	11	1	0	0	1	9	0	10	0.909091	0	0	0	12	0	12	0.272727	0	0	0	4	0	4	1	0	0	0	11	0	11	0	0	0	0
HK2	Up	10	6	6	0	6	4	0	6	10	0.181818	0	0	9	3	0	12	0.454545	1	9	2	0	10	12	0.833333	0	6	3	3	6	12	0	0	1	3	0	1	4	0.444444	0	2	5	5	2	12	0.583333	0	3	6
HKDC1	Up	10	1	5	0	0	1	11	0	12	1	0	3	2	7	3	12	0	0	2	4	6	2	12	0.0833333	0	1	4	7	1	12	0.545455	0	0	3	1	0	4	0.25	0	1	2	8	1	11	0	0	4	1
PDE7A	Up	10	1	0	0	2	2	5	2	9	0.0833333	0	0	0	12	0	12	0.166667	0	0	3	9	0	12	0.166667	0	0	1	10	0	11	0	0	0	1	3	0	4	0.8	0	3	2	7	3	12	0.166667	0	1	0
ADCY3	Up	9	3	1	0	1	9	1	1	11	0.818182	1	0	4	6	1	11	0.454545	0	0	7	5	0	12	0.583333	0	6	2	3	6	11	0	0	1	1	2	1	4	0.0909091	0	1	6	5	1	12	0.272727	0	1	6
AMPD2	Up	9	2	6	0	1	0	7	1	8	0.166667	0	0	0	9	0	9	0	0	3	2	4	3	9	0.6	1	0	1	10	1	12	0.583333	0	0	1	3	0	4	0.5	0	2	4	5	2	11	0	0	1	2
NT5C3A	Up	9	14	4	0	10	1	0	10	11	0.333333	0	8	1	1	8	10	1	3	7	0	0	10	10	1	0	8	1	1	8	10	0.0833333	0	3	1	0	3	4	1	0	10	2	0	10	12	0	0	10	0
NPR1	Down	13	0	3	NS	NS	NS	NS	NS	NS	NS	NS	NS	NS	NS	NS	NS	NS	NS	NS	NS	NS	NS	NS	NS	NS	NS	NS	NS	NS	NS	NS	NS	NS	NS	NS	NS	NS	NS	NS	NS	NS	NS	NS	NS	NS	NS	NS	NS
PDE2A	Down	13	14	6	0	0	0	11	0	11	0.181818	0	0	1	11	0	12	0	0	0	0	11	0	11	0.5	0	0	0	11	0	11	0.272727	0	0	1	3	0	4	0.666667	0	0	0	10	0	10	0	0	0	0
PDE7B	Down	12	13	0	0	0	9	1	0	10	0	0	0	3	9	0	12	0	0	5	5	1	5	11	1	0	0	7	5	0	12	0.25	0	1	1	2	1	4	0.0833333	0	0	7	4	0	11	0	0	1	2
ADCY5	Down	11	11	1	2	4	3	3	6	12	0.25	0	3	2	6	3	11	0.916667	0	0	4	8	0	12	0.25	0	3	4	5	3	12	0.5	0	0	1	3	0	4	0.8	0	3	0	8	3	11	0.0909091	1	2	1
ACADM	Down	10	4	5	1	4	3	2	5	10	0.5	0	7	3	2	7	12	0	1	5	5	1	6	12	0.0909091	2	7	1	1	9	11	0.5	0	2	1	0	2	3	0.125	9	3	0	0	12	12	0.583333	0	2	1
PDE3A	Down	9	12	5	0	2	4	5	2	11	0.875	2	1	1	8	3	12	0.25	6	4	2	0	10	12	0	0	2	5	5	2	12	0.416667	0	0	1	3	0	4	0.666667	0	1	6	5	1	12	0.833333	1	0	3
PDE5A	Down	9	3	8	0	8	4	0	8	12	0.727273	0	8	3	0	8	11	0.181818	1	9	2	0	10	12	0.166667	0	7	4	0	7	11	0	0	2	0	1	2	3	0.727273	0	6	5	0	6	11	0	0	3	6
[truncated: 53 more columns]

## Sheet: protein levels validation (MS)
Based on MS data differential expression between 10 cancers and matched normal tissues was calculated through fold changes and evaluated by statistical tests (Wilcoxon rank-sum) with adjusted p-values for multiple testing (Bonferroni) obtained from CPTAC (Clinical Proteomic Tumor Analysis Consortium) database.
Gene signatures	Gene regulation in cancers vs. normal controls (CA vs. NC)	Count in 17 cancer types (TCGA RNA-Seq datasets)	Count in 14 cancer types (HPA IHC staining)	Count in 10 cancer types (CPTAC MS data)	COAD		HNSC		KIRC		LIHC		PDAC		LUSC		UCEC		ECAC		LUAD		OV
					Log2foldchange	Adjusted p-value	Log2foldchange	Adjusted p-value	Log2foldchange	Adjusted p-value	Log2foldchange	Adjusted p-value	Log2foldchange	Adjusted p-value	Log2foldchange	Adjusted p-value	Log2foldchange	Adjusted p-value	Log2foldchange	Adjusted p-value	Log2foldchange	Adjusted p-value	Log2foldchange	Adjusted p-value
NME1	Up	16	14	9	0.477733	5e-17	0.350005	1.21e-08	0.323602	5.35e-15	0.363155	1.1e-16	-0.283881	0.00148	0.686338	6.94e-30	0.570481	1.96e-08	0.488982	8.96e-12	0.671363	1.16e-26	0.752644	8.25e-07
RRM2	Up	16	0	9	0.467761	1.51e-10	0.505135	1.17e-09	0.357396	1.03e-06	0.96173	2.23e-35	0.582618	4.29e-08	1.15409	5.79e-29	0.64822	0.00794	0.710442	1.44e-07	0.410998	3.34e-06	NS	NS
PPAT	Up	15	1	5	0.132448	0.0219	0.336153	1.2e-12	0.524202	8.03e-24	NS	NS	-0.253496	1.33e-07	0.730231	1.26e-28	NS	NS	NS	NS	0.562504	3.89e-24	NS	NS
GMPS	Up	14	0	6	0.492683	5.93e-22	0.467125	7.59e-14	0.130615	0.00769	0.67107	2.93e-48	NS	NS	0.882415	1.53e-29	NS	NS	NS	NS	0.394931	2.81e-24	NS	NS
IMPDH1	Up	14	5	6	0.480274	8.45e-15	0.237833	1.13e-05	0.82468	4.02e-23	NS	NS	NS	NS	0.229718	2.71e-09	0.376415	0.000488	0.32692	5.9e-05	NS	NS	NS	NS
RRM1	Up	14	3	7	0.589512	2.75e-15	NS	NS	0.41706	3.67e-17	0.743237	5.99e-35	0.401319	1.22e-12	0.826212	5.92e-26	NS	NS	0.469165	4.74e-05	0.456359	2.3e-15	NS	NS
ATIC	Up	13	3	1	NS	NS	0.227852	3.67e-06	0.254726	2.71e-09	NS	NS	NS	NS	0.240313	1.97e-09	0.243886	0.0167	NS	NS	0.316305	7.29e-20	NS	NS
PKM	Up	13	13	5	NS	NS	NS	NS	1.20103	1.56e-28	0.320795	0.0322	0.645622	1.49e-24	0.341646	1.86e-13	0.582881	2.54e-07	0.444684	4.5e-09	0.288278	7.06e-14	0.361412	0.00523
APRT	Up	13	11	8	NS	NS	NS	NS	0.151554	0.0333	-0.54971	8.66e-36	-0.170153	0.0245	NS	NS	NS	NS	NS	NS	NS	NS	NS	NS
DCK	Up	12	0	8	0.187038	0.0273	0.290664	0.0112	0.821029	5.32e-23	0.602904	1.09e-22	0.352748	0.000424	0.281555	1.47e-07	NS	NS	0.428091	8.39e-09	0.303384	9.96e-11	NS	NS
ENTPD2	Up	12	8	0	NS	NS	NS	NS	NS	NS	NS	NS	NS	NS	NS	NS	NS	NS	NS	NS	NS	NS	NS	NS
HPRT1	Up	12	12	2	NS	NS	0.283945	0.000101	NS	NS	NS	NS	-0.323296	6.08e-10	0.379955	4.71e-12	NS	NS	NS	NS	NS	NS	NS	NS
PAICS	Up	12	14	7	0.509576	2.73e-21	0.378159	1.38e-08	0.296321	8.32e-09	-0.199491	0.000447	NS	NS	0.645508	1.11e-23	0.353372	0.000277	0.263953	1.31e-05	0.535099	1.32e-18	NS	NS
UCK2	Up	12	0	5	NS	NS	0.327755	8.55e-06	0.333533	2.06e-08	0.351497	7.58e-21	-0.285746	0.000549	0.710131	5.72e-25	0.488081	0.0343	NS	NS	NS	NS	NS	NS
DGUOK	Up	11	5	0	NS	NS	-0.276634	0.0038	-0.35153	9.93e-12	-0.367647	8.11e-15	-0.397247	6.22e-05	NS	NS	NS	NS	NS	NS	NS	NS	NS	NS
GART	Up	11	10	7	0.387485	1.14e-17	NS	NS	0.172926	9.33e-07	0.141802	0.00185	NS	NS	0.52706	1.01e-27	0.304538	0.000322	0.238779	3.54e-06	0.472186	8.05e-27	NS	NS
NUDT5	Up	11	0	4	NS	NS	NS	NS	0.204634	0.00866	-0.240303	2.62e-05	NS	NS	NS	NS	0.37413	0.0389	0.48917	3.53e-11	NS	NS	0.622173	0.00354
TXN	Up	11	12	0	NS	NS	-0.610108	2.29e-10	-0.493589	3.88e-16	NS	NS	NS	NS	NS	NS	NS	NS	NS	NS	NS	NS	NS	NS
TYMP	Up	11	2	5	0.382505	1.74e-06	0.847094	1.72e-14	1.52575	6.39e-27	NS	NS	0.679724	4.87e-17	NS	NS	NS	NS	0.702037	1.03e-08	NS	NS	NS	NS
ADA	Up	10	0	3	NS	NS	0.472579	1.47e-08	1.05957	7.04e-23	NS	NS	NS	NS	0.467315	4.92e-09	NS	NS	NS	NS	NS	NS	NS	NS
HK2	Up	10	6	6	NS	NS	0.348232	4.73e-05	1.43396	1.71e-28	NS	NS	1.2254	1.43e-26	0.55808	1.19e-15	0.853948	2.64e-08	0.752738	1.23e-13	NS	NS	NS	NS
HKDC1	Up	10	1	5	0.4465	1.43e-06	0.310451	0.0473	NS	NS	0.726076	2.91e-06	NS	NS	0.271769	0.0014	NS	NS	0.727469	7.44e-07	NS	NS	NS	NS
PDE7A	Up	10	1	0	NS	NS	NS	NS	NS	NS	NS	NS	NS	NS	-0.259465	0.0492	NS	NS	NS	NS	NS	NS	NS	NS
ADCY3	Up	9	3	1	NS	NS	NS	NS	NS	NS	NS	NS	NS	NS	0.304748	2.22e-05	-0.924861	0.000487	NS	NS	NS	NS	NS	NS
AMPD2	Up	9	2	6	0.253947	3.94e-15	0.367716	3.39e-11	0.711163	5.61e-22	-0.182326	0.0151	0.347988	1.15e-11	0.215247	1.94e-09	-0.384616	0.00206	-0.463198	1.62e-09	0.31975	5.52e-19	NS	NS
NT5C3A	Up	9	14	4	NS	NS	NS	NS	NS	NS	NS	NS	NS	NS	0.3846	4.38e-12	0.688918	4.8e-06	0.723831	7.02e-14	0.490835	1.47e-11	NS	NS
NPR1	Down	13	0	3	NS	NS	NS	NS	NS	NS	NS	NS	NS	NS	-0.938842	5.6e-14	NS	NS	-0.832839	2.04e-08	-0.613939	2.62e-08	NS	NS
PDE2A	Down	13	14	6	NS	NS	-0.939025	3.57e-20	-0.436423	1.64e-09	-1.16253	2.05e-49	NS	NS	-1.27077	4.5e-31	NS	NS	-1.19116	5.68e-14	-0.85015	2.22e-28	NS	NS
PDE7B	Down	12	13	0	NS	NS	NS	NS	NS	NS	NS	NS	NS	NS	NS	NS	NS	NS	NS	NS	NS	NS	NS	NS
ADCY5	Down	11	11	1	NS	NS	NS	NS	NS	NS	-0.891184	1.2e-18	NS	NS	NS	NS	NS	NS	NS	NS	NS	NS	NS	NS
ACADM	Down	10	4	5	-0.4672	3.9e-13	-0.697238	1.89e-05	-1.62437	2.6e-25	-1.01389	1.01e-33	-1.01025	8.38e-23	NS	NS	NS	NS	NS	NS	NS	NS	NS	NS
PDE3A	Down	9	12	5	-0.976598	4.43e-24	NS	NS	NS	NS	-0.395845	6.47e-11	-0.503078	1.97e-14	-0.66438	5.04e-20	NS	NS	NS	NS	-0.425971	1.07e-08	NS	NS
PDE5A	Down	9	3	8	-1.02919	7.38e-27	-0.279546	0.00576	NS	NS	-0.248397	7.95e-06	-0.385416	6.88e-10	-1.15346	6.8e-28	NS	NS	-0.837711	1.27e-09	-1.04284	5.71e-31	-1.37973	0.000242

## Sheet: Association with TIICs
Pearson's correlations between purine metabolism-related pan-cancer gene signatures and tumor infiltrating immune cells
Cancer type	Gene signatures	B.cells.memory P	B.cells.memory R	B.cells.naive P	B.cells.naive R	Dendritic.cells.activated P	Dendritic.cells.activated R	Dendritic.cells.resting P	Dendritic.cells.resting R	Eosinophils P	Eosinophils R	Macrophages.M0 P	Macrophages.M0 R	Macrophages.M1 P	Macrophages.M1 R	Macrophages.M2 P	Macrophages.M2 R	Mast.cells.activated P	Mast.cells.activated R	Mast.cells.resting P	Mast.cells.resting R	Monocytes P	Monocytes R	Neutrophils P	Neutrophils R	NK.cells.activated P	NK.cells.activated R	NK.cells.resting P	NK.cells.resting R	Plasma.cells P	Plasma.cells R	T.cells.CD4.memory.activated P	T.cells.CD4.memory.activated R	T.cells.CD4.memory.resting P	T.cells.CD4.memory.resting R	T.cells.CD4.naive P	T.cells.CD4.naive R	T.cells.CD8 P	T.cells.CD8 R	T.cells.follicular.helper P	T.cells.follicular.helper R	T.cells.gamma.delta P	T.cells.gamma.delta R	T.cells.regulatory..Tregs. P	T.cells.regulatory..Tregs. R
BLCA	ACADM	0.220786	0.0615887	0.730392	-0.0173486	0.310591	0.0510181	0.0178911	0.118793	0.0145536	0.12255	0.729712	-0.0173941	0.133814	-0.0753747	0.00164482	-0.157495	0.0469535	0.0997763	0.367271	-0.0453696	0.268289	0.0556918	0.259455	0.05673	0.0681053	-0.0916557	0.222808	0.0613204	0.0230205	-0.11407	0.125157	-0.0770917	0.0126842	0.124999	0.05304	-0.0971711	0.126499	-0.0768197	0.0731578	0.0900313	0.108368	0.0807043	0.880825	0.00754816
BRCA	ACADM	0.000197346	-0.124464	0.00436769	0.0954584	0.925419	0.00314221	0.0251913	0.0750329	0.0249865	0.0751383	0.000693503	-0.113497	0.805384	0.00827036	0.000940357	0.110692	0.00380576	0.0969092	0.133514	0.050332	0.00359855	0.0974936	0.807164	-0.00819318	2.37993e-08	-0.185734	0.0902671	0.0568167	0.138881	-0.0496479	0.193354	0.0436408	2.82209e-12	0.231323	0.331985	0.0325557	0.00153058	-0.106068	0.147204	-0.0486262	0.254826	0.0382093	3.45704e-19	-0.29387
CESC	ACADM	0.456347	-0.0477075	0.00565444	0.175946	0.686543	-0.0258569	2.33274e-05	0.266194	0.562083	-0.03714	0.00012171	-0.242565	0.249015	0.0737718	0.17935	-0.0858903	0.0650069	-0.117836	0.00133958	0.203388	0.0438552	0.128623	0.782991	-0.0176489	0.729541	-0.0221534	0.59826	-0.0337566	0.223706	-0.0778548	0.724499	0.0225837	0.00339003	0.186121	NA	NA	0.745646	-0.0207857	0.807175	-0.0156402	0.0994722	0.10528	0.0179317	-0.15082
CHOL	ACADM	0.929074	0.0156116	0.776151	-0.0498422	0.340082	-0.166166	0.353662	0.161613	0.11437	0.271694	0.645003	0.0806779	0.353593	0.161636	0.7773	-0.0495798	0.203182	0.220447	0.262988	-0.194455	0.49102	-0.120356	0.969719	0.00665822	0.649039	-0.0796975	0.160767	-0.242315	0.840938	-0.0351911	0.20601	-0.219107	0.338608	0.166667	0.282634	-0.18679	0.0690629	-0.310924	0.439249	0.135043	0.288399	0.184606	0.319857	-0.173158
COAD	ACADM	0.74444	-0.0156737	0.282535	0.0516394	0.872847	0.00769551	0.0893674	-0.0815475	0.955904	-0.00265881	0.231259	0.0575156	0.558018	-0.0281618	0.819249	-0.0109875	NA	NA	0.992082	-0.000477198	0.915631	-0.00509399	0.0698063	-0.0870201	0.0210724	-0.110576	0.0956599	0.0799936	0.136798	-0.07145	0.858503	0.00857237	5.38277e-05	0.192366	0.0795358	0.0841614	9.46649e-05	-0.186075	0.382719	-0.0419545	0.0692278	0.0872	0.0158971	-0.115557
ESCA	ACADM	0.984088	0.00226545	0.0659	0.206645	0.984637	0.00218723	0.147237	0.163524	0.661922	-0.0496384	0.135887	-0.168188	0.0564893	0.214126	0.133515	-0.169199	0.0296431	-0.243316	0.00223543	0.337031	0.980816	0.00273143	0.0409566	-0.22908	0.606018	0.0585362	0.155838	-0.160167	0.422462	-0.0909289	0.581698	0.0625168	0.100807	0.184789	0.505551	-0.0755188	0.86989	-0.0186045	0.472724	0.081429	0.725638	0.0398471	0.00607636	0.304228
HNSC	ACADM	0.000788663	-0.151156	0.00318614	0.132978	0.206439	-0.0571747	0.999845	8.78585e-06	0.550258	-0.0270508	0.0547167	-0.0868451	0.166479	0.0626035	0.0503153	-0.0884731	0.450484	-0.034167	0.0625684	0.0841933	0.520697	-0.029083	0.804266	-0.0112241	0.757516	-0.0139827	0.0453118	-0.0904753	0.116079	0.0710824	0.281495	0.048748	0.505279	0.0301664	0.720202	-0.0162217	0.214961	-0.0561185	0.023638	0.102223	0.022132	0.103353	0.344384	0.0428048
KIRC	ACADM	0.0969816	-0.0737172	0.0210818	0.102318	0.26558	0.0494863	2.09286e-11	0.291477	0.1924	0.0579282	2.48593e-13	-0.317119	1.01373e-05	0.194456	1.80201e-07	0.229021	0.389348	-0.0382721	2.06731e-10	0.277153	8.56006e-08	0.234834	7.42491e-05	0.17487	0.201147	-0.0568091	0.434626	-0.0347397	6.73806e-05	-0.175874	0.000216571	-0.163408	0.00173456	0.138642	NA	NA	0.0127057	-0.110494	0.000101489	-0.1716	0.0348425	0.0936492	1.68688e-24	-0.431891
LIHC	ACADM	0.210039	-0.0657636	0.0345569	0.110666	0.591558	-0.0281769	0.330235	-0.0511047	0.0113134	0.132446	0.0319764	-0.112289	0.00536754	0.14545	1.11586e-05	0.227714	0.188088	0.0690507	1.03214e-05	0.228568	0.00586495	0.143958	0.137286	0.0779283	0.933159	0.00440508	0.0221528	0.119725	0.134346	-0.0785145	0.0042374	-0.149367	0.466905	0.0381975	0.887025	0.00746174	0.000372451	-0.1853	0.478471	-0.0372132	0.45235	-0.0394555	6.76609e-07	-0.25655
LUAD	ACADM	0.0320487	-0.0955113	0.452982	0.0335016	0.29304	0.0469272	0.0438406	0.0898239	6.57379e-05	0.176819	0.0039025	-0.128337	0.769824	-0.0130656	0.00050011	0.154494	0.143522	-0.0652508	0.00336214	0.130391	0.00179096	0.138775	0.031456	0.0958419	0.084318	0.0769665	0.170203	-0.0611884	0.996187	-0.000213419	0.179995	-0.0598177	0.156181	0.0632581	NA	NA	0.137049	-0.0663222	0.94581	0.00303513	0.506322	-0.0296697	0.0270737	-0.0984666
LUSC	ACADM	0.39796	-0.0390786	0.536867	0.028556	0.341333	-0.0439869	0.0714103	0.083237	0.0553705	0.0884388	0.00175848	-0.143927	0.120552	0.0717085	0.00084771	0.153408	0.00174071	-0.144063	0.119502	0.0719113	0.0803288	0.0807485	0.00730239	0.123599	0.383958	-0.04025	0.397672	0.0391024	0.759388	-0.0141648	0.00540185	0.128138	0.218818	0.0568263	0.0474746	0.0914766	0.383059	0.040326	0.00471014	-0.130155	0.753181	0.0145424	0.0840412	-0.0797784
PAAD	ACADM	0.0658198	-0.138985	0.0364324	0.15783	0.460982	-0.0559259	0.0273762	0.166317	0.165568	0.104977	2.66896e-07	-0.37619	0.336408	0.0728826	0.235411	0.0898978	0.842287	0.0151046	0.0459044	0.150688	0.0187295	0.177063	0.0655056	0.139146	0.0208105	-0.174136	0.184899	-0.1004	0.826069	0.0166817	0.0329901	0.160819	2.17106e-05	0.314189	0.804159	0.0188237	0.0789805	0.13277	0.0252975	-0.1686	0.349368	0.0709565	0.000204878	-0.27637
PRAD	ACADM	0.0137038	-0.112797	3.48797e-07	0.230733	0.652918	0.0206429	0.00425835	0.130657	0.544154	0.0278394	0.735838	0.0154868	0.000968972	0.150601	0.530222	-0.0288086	0.503413	0.0307107	0.206685	0.0579201	0.699946	0.017691	6.37747e-05	0.18202	3.8827e-05	-0.187206	0.985862	0.000813517	0.205782	-0.0580352	0.138058	0.0680045	0.0192454	0.107148	NA	NA	0.000170774	-0.171277	0.471705	0.0330308	0.289475	0.0485997	6.19925e-06	-0.205264
READ	ACADM	0.026596	0.176982	0.0650805	0.147596	0.36869	0.0722258	0.507163	0.0533225	0.195154	-0.103941	0.540512	0.0492097	0.466255	0.0585656	0.132047	-0.120723	0.239114	-0.0944958	0.135685	0.119607	0.0511091	-0.155964	0.0714105	-0.144283	0.0465156	-0.159132	0.0525363	-0.155028	0.23615	0.095092	0.110111	0.128008	0.111097	0.127657	NA	NA	0.0132378	-0.197339	0.476919	0.0571757	0.160806	0.112464	0.0024373	-0.240268
STAD	ACADM	0.603126	0.0271156	0.00576006	0.143288	0.70931	-0.019444	0.56927	-0.0296814	0.0219587	0.119086	0.312182	0.0526831	0.000269645	-0.188322	0.164772	0.0723711	0.577452	0.029055	0.554178	0.0308482	0.527998	-0.03291	0.117145	0.081598	0.00246776	-0.156935	0.968419	0.00206524	0.821331	-0.01178	0.0789959	-0.0914363	9.16028e-06	0.228341	0.37954	0.0458148	5.00645e-06	-0.234768	0.118701	-0.0812543	0.341355	0.0496031	0.144031	-0.0760982
THCA	ACADM	0.0131082	-0.111439	3.81763e-06	0.205991	0.302851	-0.0464027	2.95354e-09	-0.262687	2.04913e-08	0.24871	0.0325132	-0.0961184	0.676297	0.0188121	0.0665	0.0825467	0.0463601	0.0895846	0.952617	0.00267755	0.0483885	0.0887712	0.334918	-0.0434294	0.237348	0.0532077	0.0345212	0.0950392	0.880663	-0.00676483	3.881e-05	-0.183818	0.603547	0.023397	NA	NA	0.686617	0.0181782	0.729693	-0.015569	0.635613	0.0213491	9.95634e-07	-0.217807
UCEC	ACADM	0.899759	-0.00550543	0.0708442	0.078831	0.00320605	0.12828	0.503835	-0.0292099	0.00585538	0.120008	0.069065	-0.0793321	0.00107564	0.14219	2.5985e-09	0.255929	0.152168	-0.0625222	0.802542	0.0109287	0.0903097	-0.0739265	0.631811	-0.0209407	0.035325	-0.09179	0.0603807	-0.081942	0.476305	-0.0311224	0.178138	0.0587998	0.00306722	0.12887	NA	NA	2.07084e-06	-0.205233	3.44129e-06	0.200837	5.48565e-06	0.196713	1.28841e-21	-0.39988
BLCA	ADA	0.15503	-0.0715016	0.0705133	-0.0908696	0.000394365	-0.177011	0.28872	-0.0533771	0.111192	-0.0800674	0.000976826	0.164864	1.26886e-09	0.298669	0.264413	0.0561444	0.253296	0.0574682	0.097389	-0.0833129	0.126666	-0.076786	0.0177656	0.118923	0.653199	-0.0226193	0.00614888	0.137285	0.0609039	-0.0941509	1.416e-13	0.35977	0.0231848	-0.113935	0.116303	-0.078946	0.00498704	0.140665	0.841121	-0.0100923	0.736875	-0.0169152	7.02542e-16	-0.390097
BRCA	ADA	0.0583116	0.0634904	0.0832769	-0.0580887	0.0629857	0.0623506	0.611243	-0.017061	0.0100747	-0.0862162	0.00108057	0.109391	8.03158e-14	0.24685	6.75092e-09	-0.192762	0.05738	-0.0637265	5.62796e-22	-0.315178	1.66125e-06	-0.159779	0.485668	-0.0234004	0.00610782	-0.0918447	0.718784	-0.0120866	1.15017e-09	-0.202211	2.05235e-27	0.352374	0.0250762	-0.0750921	0.166674	-0.0463975	7.2472e-10	0.204603	2.37471e-11	0.221469	6.61859e-06	0.15038	7.94809e-10	0.204127
CESC	ADA	0.268759	-0.0707832	0.0427181	-0.129318	0.29734	-0.0667111	0.796387	0.0165342	0.849641	0.0121483	0.567633	-0.0366144	0.000935882	0.209699	0.703726	-0.0243672	0.0388025	0.131837	0.165344	-0.0887296	0.482454	-0.0449874	0.363837	0.0581441	0.764723	0.0191776	0.204543	0.0811701	0.0881224	-0.108962	0.0357446	0.133958	0.13274	-0.0961197	NA	NA	0.289188	0.0678447	0.396022	-0.0543509	0.444587	-0.0489609	0.496968	-0.0435097
CHOL	ADA	0.901497	-0.0217069	0.42743	0.138525	0.948511	-0.0113265	0.247509	-0.200764	0.220827	-0.212291	0.325086	0.171325	0.240885	-0.203544	0.820507	-0.0397815	0.982727	-0.00379737	0.331396	-0.169136	0.405035	-0.145273	0.257323	0.196734	0.0165759	-0.402325	0.94239	0.0126752	0.681315	-0.0719383	0.99378	0.00136733	0.308915	-0.177056	0.092556	0.288716	0.310083	-0.176635	0.677511	-0.0728455	0.0152863	0.406853	0.416953	0.141656
COAD	ADA	0.304398	0.0493552	0.230082	-0.0576608	0.811549	-0.0114644	0.0489359	-0.0944741	0.00930081	-0.124571	0.888062	0.00676816	1.83556e-06	0.226414	0.184939	-0.0636812	NA	NA	0.545984	0.0290269	0.941968	-0.00350039	0.216579	-0.0593647	0.484677	0.0335921	0.895163	0.00633627	0.00105609	-0.156513	5.40086e-05	0.19233	4.74444e-05	-0.193746	0.0768108	0.084932	4.16818e-05	0.195151	0.289689	0.0508793	0.246753	0.055652	0.47656	-0.0342189
ESCA	ADA	0.37204	0.101138	0.000126585	-0.415535	0.190711	0.147814	0.72692	-0.0396534	0.850153	0.0214575	0.102141	0.184082	0.955401	-0.00635259	0.452694	-0.085144	0.62908	0.0548258	0.106007	-0.182071	0.1877	-0.148812	0.285868	0.120783	0.0576794	0.213126	0.188664	-0.148491	0.420184	-0.0913743	0.730015	-0.0391858	0.703874	-0.0431554	0.401866	-0.095007	0.866478	-0.0190967	0.733821	0.0386119	0.138288	0.167177	0.0062539	-0.303228
HNSC	ADA	0.492679	-0.0310646	0.000962287	-0.148689	0.673443	-0.0190852	0.0761098	-0.0802041	0.179569	0.0607283	0.523862	0.0288627	0.00861287	0.118562	0.137397	0.0672063	0.00591598	0.124176	7.30475e-05	-0.178191	0.559088	0.0264542	0.696442	-0.017668	0.789342	-0.0120997	0.000201558	0.167163	1.4489e-05	-0.194517	0.0306869	0.097645	0.00268394	0.135329	0.119038	0.070513	0.0777471	-0.079762	1.48955e-05	-0.19425	0.20447	-0.0574233	0.0118846	-0.113563
KIRC	ADA	0.381959	0.0388716	0.0347976	-0.0936722	1.10152e-05	-0.193678	0.00721484	-0.119075	0.00106708	-0.144772	8.80757e-07	0.216087	0.845368	0.00867434	0.316991	-0.0444848	0.112128	0.0705731	6.44012e-09	-0.253943	0.000359048	-0.157723	0.276772	0.0483453	4.76463e-05	-0.179415	0.869103	0.00732971	3.20692e-07	0.224412	1.76068e-09	0.262961	0.00797065	-0.117603	NA	NA	0.00150685	0.140443	0.0443046	0.0892741	0.0281926	0.0973778	0.000699366	0.149918
LIHC	ADA	0.191609	0.0685051	0.000170555	-0.195526	0.728355	-0.0182403	0.00142756	0.166327	0.823575	-0.0117094	3.63442e-08	0.283332	0.13	-0.0793989	0.000133818	-0.198599	0.779135	-0.014729	0.000624384	-0.178228	1.65709e-06	-0.247718	0.62028	0.026018	0.000527455	-0.180566	0.0143475	-0.128069	0.128052	0.0798028	4.19192e-06	0.238202	0.18432	-0.0696427	0.380727	-0.0460147	0.947957	0.00342827	0.188224	0.0690293	0.580429	0.0290262	0.00621814	0.142965
LUAD	ADA	0.0360409	-0.0934117	0.708697	-0.016682	7.47173e-05	-0.17549	7.14866e-08	-0.237131	0.126737	0.0681124	1.21406e-05	0.193515	8.243e-08	0.236034	0.182405	-0.0594889	0.453671	0.0334506	1.21228e-08	-0.250377	4.66388e-06	-0.202369	0.0220006	0.102008	0.340057	0.0425833	0.0493766	0.0875917	0.167242	0.0616145	4.16477e-12	0.302252	1.46668e-07	-0.231537	NA	NA	0.00374739	0.128898	0.485124	0.031165	0.0767028	0.0789215	0.145171	0.0649839
LUSC	ADA	0.205215	-0.0585404	0.384878	0.0401722	0.0490152	-0.0908523	0.0222102	0.105467	0.749759	0.0147508	0.857489	0.00830498	0.00128441	0.148077	0.612889	0.023397	0.172525	0.0630281	4.3616e-05	-0.187366	0.143922	-0.0675095	0.276683	-0.0502786	0.0729895	-0.0827786	0.147254	0.0669544	0.0139591	-0.11333	0.00192109	0.142739	0.327257	-0.0452854	0.510938	0.0303965	0.188147	0.0608119	0.181591	-0.0617248	0.619523	0.0229612	0.794102	0.0120702
PAAD	ADA	0.858381	0.013546	0.00116815	0.242776	0.0236447	0.170533	0.722147	-0.0269912	0.198806	0.097321	0.218822	0.0931517	0.159188	0.106574	0.342208	0.0720149	0.0336394	-0.160236	0.330716	-0.0737435	0.00551613	-0.208375	0.00136805	0.239493	0.000153234	-0.281574	0.316661	-0.075911	0.309352	0.077063	0.000288734	0.270088	0.000430135	-0.262594	0.0398695	0.155076	0.073587	0.135207	0.5026	0.0508633	0.0687181	0.137535	0.875215	0.0119218
PRAD	ADA	0.000259907	0.166495	0.0406606	-0.0937639	0.02075	0.105862	0.00748494	0.122316	0.0583043	-0.0867571	0.225819	-0.0555599	0.288066	0.0487417	0.15091	0.0658661	0.402795	0.0383937	0.0146349	-0.111722	0.513708	-0.0299742	0.294487	0.0480981	0.165377	-0.0636186	0.363334	0.041713	1.28902e-17	-0.377644	0.0272965	0.101069	5.66354e-08	0.245414	NA	NA	0.00907904	0.119347	0.428024	-0.0363731	0.00183573	0.1423	6.57176e-06	0.204714
READ	ADA	0.872853	-0.0128746	0.652601	0.0362035	0.325476	0.0789817	0.0660182	-0.147089	0.75036	-0.0255927	0.0971066	0.13288	0.206929	0.101273	0.67811	0.0333816	0.290881	0.0848189	0.269211	-0.0887141	0.00967194	-0.20592	0.497386	0.0545544	0.013051	-0.197735	0.85934	0.0142564	0.468719	-0.0582428	0.000943609	0.261398	0.00268323	-0.238025	NA	NA	0.804498	-0.0199122	0.179582	0.107655	0.00733129	0.213237	0.000518131	-0.273904
STAD	ADA	0.91382	-0.00564524	0.687778	-0.020961	0.535403	-0.0323217	0.0785937	-0.0915588	0.289996	-0.0551543	0.0341	0.110193	0.00504406	0.1455	0.0175845	-0.123377	0.77889	-0.0146451	0.00627195	-0.141854	0.00919284	-0.135252	0.244554	-0.0606463	0.000170631	-0.194212	0.00561987	0.143701	0.790825	0.0138353	3.77533e-06	0.237709	5.48455e-05	-0.208119	0.333212	0.0504451	0.00387075	0.149825	4.33343e-05	0.210892	0.0939938	0.0871925	0.308889	-0.0530425
THCA	ADA	0.0157335	0.108502	0.127358	0.0686185	0.000926434	-0.148412	0.536944	0.0278168	0.109733	-0.0719761	0.408192	0.0372557	4.42165e-07	0.224635	1.14429e-05	-0.195806	0.495988	-0.0306708	0.000591153	-0.153889	1.4382e-06	-0.214639	0.044452	0.0903775	0.0257793	-0.10021	0.02458	-0.101034	1.70142e-15	0.347503	1.68995e-09	0.266567	5.13067e-07	-0.2234	NA	NA	0.0133985	0.11109	8.5415e-08	0.237842	4.03911e-07	0.225382	0.783893	-0.0123573
UCEC	ADA	0.0132882	0.107898	0.437493	-0.0339251	5.85253e-06	0.196134	4.47741e-07	-0.217947	0.0393723	-0.0898642	0.25371	-0.0498544	8.91492e-05	0.170008	0.0219137	0.0999174	0.0207607	-0.100804	0.0267799	0.09657	0.00278733	-0.130137	0.062831	-0.0811759	0.0157484	0.105244	0.109317	-0.0698997	0.393282	-0.0372981	0.345328	0.0412275	0.0005342	-0.150491	NA	NA	0.859667	-0.00772704	0.0367055	0.0911131	0.00464607	0.123242	4.55009e-07	-0.217817
BLCA	ADCY3	0.908938	-0.00575861	0.0694836	-0.091203	0.375177	-0.0446266	0.715531	-0.0183469	0.891457	0.00687038	0.074984	0.0894667	0.000469567	0.174735	0.551877	-0.0299474	0.156257	0.0712902	0.21715	-0.0620758	0.481835	-0.0354009	0.00640632	0.136614	0.14407	-0.0734481	0.0245825	0.112814	0.00422049	-0.143309	5.44989e-05	0.201095	0.0526258	0.0973402	0.0010453	-0.163923	0.30399	0.0517181	0.471594	0.0362325	0.587953	0.0272734	1.21459e-07	-0.261744
BRCA	ADCY3	0.0322158	-0.0717989	0.154286	0.047791	0.669502	0.0143268	0.31781	0.0335232	0.821495	-0.00757341	0.572183	0.0189584	0.00414447	0.0960133	0.868141	-0.00557281	0.354248	0.0310886	0.041379	-0.0683873	0.0344743	0.070888	0.555744	0.019775	7.14942e-11	-0.216182	2.33861e-05	0.141271	7.79084e-07	-0.164706	8.1628e-05	0.131664	0.00149811	0.106276	0.371521	0.0299899	0.133236	-0.050368	0.400767	-0.0281993	0.141703	-0.0492964	0.000749863	-0.112783
CESC	ADCY3	0.430123	-0.0505288	0.110333	0.102056	0.462596	-0.0470488	0.82062	-0.0145302	0.703835	-0.0243578	0.886838	0.00911937	0.284297	0.0685351	0.846109	-0.0124373	0.63331	0.0305656	0.661779	-0.0280286	0.224116	-0.077786	0.726174	0.0224407	0.0671439	-0.116917	0.0256338	0.142289	0.822115	-0.014407	0.444883	0.0489292	0.0156916	0.153904	NA	NA	0.304602	-0.0657185	0.399622	-0.0539385	0.772521	0.0185238	0.0552765	-0.122368
CHOL	ADCY3	0.383587	-0.151938	0.431019	0.137462	0.824028	-0.0389886	0.680497	0.0721334	0.38074	0.152839	0.131915	0.2597	0.637798	0.0824345	0.743763	0.0572869	0.717976	0.0632851	0.769997	-0.0512498	0.143998	-0.252111	0.794789	0.0455975	0.0626781	-0.317972	0.243879	-0.202281	0.948122	-0.0114121	0.505154	-0.116489	0.362966	-0.158555	0.43647	-0.135857	0.0427555	-0.344422	0.489631	0.120739	0.000753784	0.542833	0.135979	-0.257093
COAD	ADCY3	0.175934	0.065008	0.246534	0.0556777	0.449114	-0.0363829	0.0055721	-0.132699	0.00311783	-0.141417	3.84775e-05	0.196014	0.814954	-0.0112534	0.252539	-0.054977	NA	NA	0.281849	-0.051713	0.738534	0.0160494	0.00420713	-0.136979	0.000645211	-0.16296	0.111213	0.0764754	0.327429	-0.0470635	0.819621	0.0109646	0.200547	-0.0614899	0.476955	0.0341882	0.130434	-0.0726269	0.309105	-0.0488778	0.610076	0.0245178	0.519698	0.03095
ESCA	ADCY3	0.742117	-0.0373642	0.0427215	0.227165	0.629843	0.054704	0.276773	0.123071	0.328104	0.110743	0.820534	0.0257649	0.167862	-0.155697	0.244023	0.131755	0.806375	0.0278364	0.847382	0.0218591	0.120194	0.175149	0.856652	-0.0205166	0.595105	-0.0603133	0.366043	-0.102406	0.526933	0.0717757	0.491016	0.0781098	0.2288	0.136065	0.355109	0.104751	0.0101618	-0.285842	0.381287	-0.0992066	0.466468	-0.0825799	0.267551	-0.125442
HNSC	ADCY3	1.2007e-06	-0.217279	0.000140831	0.171136	0.737694	0.0151675	0.00280242	-0.13474	0.0691441	-0.0821762	0.0159736	0.108805	0.0862855	-0.0775718	0.698575	-0.0175374	0.848384	-0.00865862	0.275903	0.0493178	0.401353	-0.0379948	0.963085	0.00209619	2.58932e-05	-0.188817	0.0106293	0.115317	0.722444	-0.0160861	0.82668	0.00991674	8.76112e-06	0.199326	0.630369	0.0217918	1.3947e-05	-0.194886	0.00849835	-0.118766	0.776617	-0.0128499	0.0894135	-0.0768132
KIRC	ADCY3	0.0849528	-0.0765064	0.00813305	0.117303	0.0109632	-0.112784	0.000346781	0.15812	9.28485e-05	-0.172537	0.200523	-0.0568877	0.000479216	0.154388	2.84671e-05	0.184554	0.452713	0.0333887	0.00727167	0.118959	0.453894	0.0333016	0.0194355	0.103667	1.70488e-06	-0.210462	0.0131642	0.109938	0.465467	-0.0324544	0.90432	0.00534642	0.00109951	0.144401	NA	NA	0.0539674	-0.0855551	1.14848e-06	-0.213845	0.164739	-0.0617338	1.8197e-06	-0.209898
LIHC	ADCY3	0.0486989	0.103257	0.657227	-0.0233034	0.705952	0.0198147	0.00460811	0.147988	0.34855	0.0492051	0.127595	0.0798983	0.899229	0.00665111	0.81229	-0.0124722	0.0451419	0.104929	0.569749	-0.0298483	0.736123	-0.0176983	0.241238	0.0614928	0.107039	-0.0844962	0.651391	-0.0237279	0.459988	-0.0387925	0.815448	0.0122585	0.0196345	0.12209	0.217741	0.0646692	0.000821621	-0.174361	0.673647	0.022117	0.0453745	-0.104817	0.017151	-0.124696
LUAD	ADCY3	0.013239	-0.110284	0.303322	-0.0459401	0.0109677	-0.113223	0.54889	-0.0267621	0.00162505	0.140029	0.013011	0.110558	0.00959444	0.115274	0.00103099	0.145769	0.14681	0.0647209	0.264187	-0.0498279	0.118351	0.0696535	0.000923973	0.147121	0.568535	-0.0254583	0.00684135	0.120327	0.000103199	-0.172095	0.00176514	0.138963	0.603321	-0.0232007	NA	NA	0.895	0.00589344	0.359776	-0.0408771	0.100817	-0.0731754	0.155205	-0.0634072
LUSC	ADCY3	0.00012828	-0.175744	0.0194882	0.107727	0.0577897	-0.0875804	0.0492206	0.0907704	0.646361	0.0212181	0.0660279	0.0848644	0.37044	-0.0414058	2.90821e-05	0.191555	0.365853	-0.0418039	0.276092	0.0503405	0.505628	-0.0307793	0.012622	-0.114976	0.400883	-0.0388372	0.0657544	0.08495	0.00221954	-0.14078	0.824022	0.0102845	0.559511	0.026985	0.161086	-0.0647476	0.405603	-0.0384497	0.0209917	-0.106447	0.00432275	-0.131405	0.0985217	-0.076296
PAAD	ADCY3	0.313801	-0.0763596	0.0706303	0.136605	0.779283	0.0212741	0.033493	0.160367	0.144894	0.110337	0.024396	-0.16964	0.589083	0.0409915	0.00794577	0.199487	0.572922	-0.0427799	0.094454	0.126453	0.37218	0.067672	0.00328503	0.220429	3.81752e-05	-0.305162	0.472241	-0.0545327	0.739409	-0.0252493	5.79425e-06	0.334246	0.240777	0.0888799	0.577944	-0.0422216	0.466974	0.0551821	0.00433125	-0.214077	0.203919	0.0962281	0.00253841	-0.2262
PRAD	ADCY3	0.226266	-0.0555065	0.00227915	0.139389	0.484195	0.0321072	9.01505e-09	0.25936	0.343949	-0.0434258	0.0330357	-0.0976244	0.0313842	0.0985595	0.314856	0.0461162	0.0374638	0.0953006	0.168646	0.0631315	0.040676	0.0937568	0.00117551	0.148135	5.28483e-06	-0.20676	0.0546657	0.0880406	3.41205e-11	-0.297346	0.390734	0.0393864	2.03199e-13	0.327897	NA	NA	0.0493863	-0.0900356	0.0385737	-0.0947549	0.545048	0.0277776	0.014938	-0.111385
READ	ADCY3	0.49037	-0.0554464	0.712372	0.0296537	0.371381	0.071822	0.307891	-0.0818952	0.000351026	-0.28172	0.00145624	0.251954	0.174595	0.108895	0.785164	-0.0219281	0.172204	-0.109498	0.393777	0.0685275	0.00816122	-0.210432	0.0945672	-0.133891	0.50522	-0.0535663	0.334655	-0.0775012	0.515918	0.0522297	0.0512506	0.15587	0.197754	-0.103342	NA	NA	0.0672471	-0.146433	0.482849	-0.0564101	0.436696	0.0625128	0.241526	-0.0940146
STAD	ADCY3	0.848808	-0.00994425	0.027118	0.114891	0.0256073	-0.116043	0.287167	0.0554784	0.134761	0.0778973	0.0247886	0.116691	0.649783	0.0236824	0.982068	-0.00117246	0.405443	-0.0433769	0.718048	0.0188332	0.758252	0.0160539	0.0909556	-0.0880058	0.000119486	-0.19868	0.000284418	0.187624	0.024562	-0.116874	0.0667611	0.0954129	0.342273	0.0495089	0.328558	0.0509324	0.413376	-0.042649	0.193906	0.0676891	0.689478	-0.0208406	0.806645	0.012767
THCA	ADCY3	0.156438	-0.0637927	3.63111e-05	0.18449	0.0103984	-0.115075	0.90384	-0.00544384	0.0460573	-0.0897086	0.767529	0.0133197	0.000576237	0.154195	0.0146094	0.109702	0.52778	-0.0284454	0.551274	0.0268446	0.00153735	-0.142007	0.410155	0.0371001	0.00405273	-0.128964	0.135353	0.0672139	0.23356	0.0536392	0.878099	0.00691127	0.989017	0.0006203	NA	NA	0.976238	-0.00134216	0.813435	0.0106338	0.0421902	0.0913553	0.00155937	-0.141824
UCEC	ADCY3	0.75731	-0.0135052	0.00496502	0.122322	0.000764147	0.146299	0.113572	-0.0690753	0.616704	0.0218734	0.816999	0.0101136	0.00345913	0.127263	0.225737	0.0529091	0.142642	-0.0640083	0.272013	0.0479808	0.00772348	-0.116036	0.53924	-0.026829	0.185682	-0.057795	0.681594	-0.0179306	0.0890556	-0.0742153	0.373441	0.0388857	0.946541	0.00293051	NA	NA	0.118651	-0.0681224	0.0716582	0.0786051	0.0426289	0.0884328	4.37176e-07	-0.218139
BLCA	ADCY5	0.153885	0.0716999	1.2499e-08	0.280828	0.00015864	-0.188462	0.986561	0.000848074	0.0654857	-0.0925371	0.365602	-0.0455277	0.841435	0.0100721	0.0120242	0.12594	0.0297584	-0.109093	1.0723e-09	0.299934	0.230826	0.060273	0.125284	-0.077066	0.350302	0.0469986	0.00111639	-0.163004	0.867226	0.00841709	0.0251699	-0.11236	0.249524	0.0579265	0.84045	-0.0101356	0.0217023	-0.115189	5.85291e-05	-0.200275	0.23698	0.0594865	0.00841335	0.132084
BRCA	ADCY5	0.53133	-0.02101	1.90777e-06	0.158863	2.65414e-07	-0.171472	0.00201456	0.10338	0.368935	-0.0301523	7.2217e-16	-0.265889	0.0370047	0.0699259	0.783972	-0.00920214	0.00341951	-0.0980237	1.2814e-25	0.340647	0.00104767	0.109681	0.227078	-0.0405299	0.695419	-0.0131414	0.00389886	-0.0966559	0.886347	0.00479769	0.00296736	-0.0994841	1.96969e-13	0.243039	0.404948	0.0279499	0.000384524	0.118758	8.04676e-08	-0.178673	0.0159496	0.0807671	0.053005	-0.0648802
CESC	ADCY5	0.979767	-0.00162525	0.000579959	0.217847	0.00756322	-0.16992	0.000138992	0.240562	0.756436	-0.0198746	0.179979	-0.0857667	0.79937	-0.0162866	0.120845	-0.0991643	0.00339708	-0.18608	1.16085e-06	0.304175	0.0668413	0.117045	0.0138627	-0.156723	0.23552	-0.0759106	0.00931086	-0.165495	0.546098	0.0386677	0.0283185	-0.139835	0.0249937	0.142906	NA	NA	0.858557	-0.0114202	0.118435	-0.0998094	0.688052	0.0257255	0.131599	0.0964025
CHOL	ADCY5	0.963638	0.00799616	0.850125	-0.0331345	0.535214	-0.108439	0.568128	0.09987	0.11437	-0.271694	0.997451	-0.000560263	0.587375	0.0949646	0.123541	-0.265266	0.341515	-0.16568	0.748639	0.0561602	0.807668	0.0426795	0.209333	-0.21755	0.0226338	0.384341	0.391207	-0.149546	0.364694	-0.157992	0.126299	-0.263403	0.242644	0.202801	0.698241	-0.0679236	0.556765	0.102801	0.619201	-0.0870056	0.974474	-0.00561236	0.193213	0.225273
COAD	ADCY5	0.0210498	0.110595	0.305451	0.049248	0.00703301	-0.129059	0.18432	-0.0637708	0.362539	-0.0437619	1.44435e-08	0.267561	0.188625	-0.0631517	0.981918	-0.00108979	NA	NA	0.827949	0.0104501	0.336882	-0.0461533	0.00231414	-0.145714	0.00111406	-0.155799	0.532472	-0.0300095	0.640668	0.0224414	0.0051947	-0.133778	0.0921159	-0.0808583	0.486455	0.0334556	0.00898065	-0.125141	0.0370376	-0.100022	0.645886	-0.0220915	6.46694e-06	0.214361
ESCA	ADCY5	0.373215	-0.100891	0.0181291	0.263645	0.254764	-0.128824	0.147529	0.163408	0.457754	-0.0841972	0.220709	-0.138438	0.378475	0.0997908	0.303431	0.116499	0.00368175	-0.321109	7.6571e-06	0.477115	0.412811	0.0928252	0.117963	-0.176194	0.824508	-0.0251849	0.0629275	-0.208909	0.047816	-0.221984	0.218673	-0.139045	0.182563	0.150542	0.747603	0.0365416	0.327001	-0.110995	0.725462	-0.0398738	0.997166	0.000403439	0.0390824	0.231189
HNSC	ADCY5	0.956731	-0.00245731	0.000126474	0.172311	0.0165631	-0.108211	0.108209	-0.0726547	0.000300922	-0.162614	0.444602	0.0346122	0.004381	-0.128514	0.311029	-0.0458587	0.000623743	-0.154019	0.00033773	0.161282	0.748505	0.0145201	0.00545078	-0.125372	0.00688997	-0.121925	0.00279061	-0.134798	1.09102e-05	0.197243	0.175368	-0.0613186	0.998569	8.12175e-05	0.49895	0.0306161	0.489338	-0.0313049	0.029882	0.098119	0.119436	0.0704371	3.10788e-08	0.246809
KIRC	ADCY5	0.0490247	-0.0873808	0.0103058	0.113732	0.197301	0.0572967	0.000177885	0.165572	0.00163707	-0.139385	1.08655e-12	-0.308863	1.78574e-05	0.189089	0.902807	-0.00543138	0.207296	-0.0560435	2.40669e-14	0.32969	2.72478e-09	0.259962	0.762584	0.0134355	0.962711	0.00207939	4.97981e-05	0.178967	0.000363783	-0.157573	3.40195e-10	-0.273926	3.18073e-07	0.224478	NA	NA	0.0974967	-0.073604	0.000618422	-0.151386	0.000906304	-0.146781	2.75937e-06	-0.206262
LIHC	ADCY5	0.00891134	0.136724	0.0679044	-0.0956673	0.626743	-0.0255384	8.73534e-07	0.254064	0.753533	-0.0164901	0.47967	0.0371119	0.611494	-0.0266737	0.179997	-0.0703331	0.780116	0.0146618	0.965905	-0.00224509	0.353682	-0.0486842	0.770998	0.0152868	0.092532	-0.0881807	0.039549	-0.107799	0.739552	-0.0174596	0.0262388	-0.116343	9.72333e-07	0.253014	0.615622	-0.0263651	0.00199106	-0.161312	0.0129571	-0.129962	0.0513352	-0.102081	0.17378	-0.0713478
LUAD	ADCY5	0.248616	0.0514844	0.14237	0.0654388	0.0457565	-0.0890259	0.162298	0.0623386	0.72223	0.0158728	0.574918	-0.0250393	0.277961	-0.0484177	0.637129	-0.0210619	0.0297243	-0.0968391	0.519851	0.0287325	0.219743	0.0547594	0.885347	0.00643886	0.274969	-0.0487199	0.758799	-0.0137108	0.186963	0.0588756	0.00120135	-0.143863	0.000488556	0.154769	NA	NA	0.165151	-0.0619188	0.732365	-0.0152701	0.466621	-0.0324993	0.00047708	0.155047
LUSC	ADCY5	0.598372	0.0243581	0.00389168	0.132921	0.0047349	-0.130079	0.351154	0.043101	0.00218951	-0.140966	0.291404	0.0487666	0.543124	-0.0281187	0.677713	-0.0192189	0.0524906	-0.0895022	0.137452	0.0686159	0.740629	0.0153087	0.000145727	-0.174321	0.518088	0.0298843	0.000126767	-0.175876	0.998297	-9.86942e-05	0.0848899	-0.0795615	0.0510185	0.0900647	0.517736	0.0299094	0.652229	-0.020841	0.179635	-0.0620018	0.9378	0.00360909	0.153331	0.0659663
PAAD	ADCY5	0.82707	0.0165842	0.422331	0.0608595	0.0152149	-0.182718	0.000193259	0.277425	0.838326	0.0154892	3.89668e-05	-0.304828	0.0425865	0.153036	0.388518	0.0653953	0.280402	-0.0818105	0.0363879	0.157868	0.000234743	0.273897	0.0195626	0.175859	0.000150462	-0.281897	0.653198	-0.0341022	0.985998	-0.00133236	0.000794117	0.250618	0.879319	-0.0115266	0.857737	-0.0136083	2.76758e-08	0.403682	0.124868	-0.116115	0.201539	0.0967344	0.0766111	-0.133824
PRAD	ADCY5	0.962476	-0.00215979	0.0342238	0.096976	0.143853	0.0670223	0.00172015	0.143165	0.0611449	-0.0858004	0.0361737	-0.0959524	0.0382898	-0.0948933	0.0357124	-0.0961902	0.288826	0.0486651	0.000234886	0.16766	0.41612	0.0373175	0.0451786	0.0917577	0.0382046	-0.0949349	0.316766	0.0459347	0.00050067	-0.158761	0.140004	-0.0676713	6.17404e-14	0.334529	NA	NA	0.83708	-0.00943973	0.00260073	-0.137586	0.195074	0.0594302	0.0229269	-0.104139
READ	ADCY5	0.0769649	0.141567	0.515379	0.0522967	0.228192	-0.096719	0.0799898	0.140154	0.139501	-0.11846	5.09574e-05	0.317454	0.0556391	0.153064	0.886524	0.0114804	0.152777	-0.114649	0.219454	0.0985522	0.0417056	-0.162741	0.029601	-0.173681	0.351726	-0.0748152	0.0396656	-0.164379	0.916265	-0.00845849	0.133878	-0.120158	0.189033	-0.105374	NA	NA	0.106878	-0.129175	0.865013	-0.0136759	0.101264	0.131269	0.193122	0.104413
STAD	ADCY5	0.00204713	0.159803	6.74111e-10	0.313791	0.287075	-0.0554889	0.0181383	0.122786	0.199986	-0.0667784	0.00121733	-0.167545	0.168682	-0.0717087	0.763342	0.0157054	3.19995e-07	-0.261955	2.46417e-16	0.408766	5.15599e-05	0.20885	1.789e-05	-0.220996	0.0233344	0.117891	1.34872e-06	-0.248127	0.868499	-0.0086364	5.41987e-11	-0.332365	0.00383504	0.149974	0.424167	0.0416721	0.583615	0.0285859	8.22703e-06	-0.229497	0.48064	-0.0367774	3.27131e-05	0.214155
THCA	ADCY5	0.00132908	0.143874	0.846472	0.00872455	5.72579e-06	-0.20229	0.0175164	-0.106744	0.642911	-0.0208893	0.0998707	-0.0740445	0.0335017	0.0955802	0.186411	0.0594845	0.921985	0.00441292	0.648745	-0.0205232	0.414944	-0.0367221	0.122015	-0.0695959	0.145483	0.0655229	0.391772	-0.0385759	0.726121	0.0157833	0.0701359	-0.0814705	0.677644	0.0187292	NA	NA	0.0281381	0.0986824	0.0408892	0.091938	0.607388	0.0231493	0.000117349	-0.172256
UCEC	ADCY5	0.211417	0.0545778	0.922272	0.00426447	0.402365	0.0365874	0.0123209	-0.109062	0.923156	-0.00421584	0.888455	0.00613014	3.8928e-05	0.178352	0.0817309	0.0759705	0.545597	-0.0264101	0.484229	0.030566	0.662714	-0.0190615	0.796344	-0.0112794	0.0892431	0.0741719	0.0192729	-0.102014	0.820192	0.00993406	0.0188658	-0.10236	0.412387	0.0358144	NA	NA	0.049008	-0.0858773	0.584957	-0.023867	0.274743	0.0477088	1.96157e-05	-0.184978
BRCA	ADSS2	9.31371e-06	-0.147968	0.000306556	0.120724	0.182968	0.0446783	0.0454255	0.0670821	0.0970859	0.0556499	0.644621	-0.0154819	0.000254955	0.122302	0.0418634	0.0682256	0.00029838	0.120957	0.844953	0.00656442	0.866295	-0.00565155	0.00685384	0.0905747	6.6615e-09	-0.192835	0.0297405	0.0728624	0.000110937	-0.129204	0.126051	0.0513194	4.1339e-07	0.168721	0.798759	0.00855794	3.22605e-06	-0.155335	0.0738055	0.0599581	0.0532272	0.0648197	3.89549e-10	-0.207773
CESC	ADSS2	0.365667	0.057923	0.0968093	0.106112	0.433252	0.0501871	0.000174091	0.237126	0.0369828	0.133081	0.112847	-0.101345	0.699513	0.0247313	0.728182	-0.0222693	0.96317	-0.00295912	0.010029	0.163888	0.037959	0.132407	0.924957	0.00603616	0.106039	-0.103299	0.424685	-0.0511261	0.137032	-0.0950728	0.548515	-0.0384354	0.000964048	0.209184	NA	NA	0.0365866	-0.133359	0.794802	0.0166658	0.893701	-0.00856294	0.00160221	-0.200167
CHOL	ADSS2	0.657386	-0.077677	0.33988	0.166234	0.695587	-0.0685509	0.928903	-0.0156491	0.11437	-0.271694	0.00109304	0.528749	0.58185	-0.0963653	0.414827	-0.142297	0.301581	0.179717	0.266518	-0.193051	0.143094	-0.252663	0.0940455	0.287461	0.898953	0.0222705	0.687513	-0.070464	0.273304	-0.190385	0.0221135	-0.385716	0.709525	-0.0652661	0.139767	-0.254713	0.00607526	-0.454622	0.0388636	0.350715	0.166152	0.239327	0.297318	0.181283
COAD	ADSS2	0.595077	0.0255525	0.0215442	0.110177	0.0801799	0.0839824	0.0693029	-0.0871766	0.267906	-0.0532351	0.300286	0.0497762	0.933208	-0.00402992	0.0452634	-0.0960524	NA	NA	0.643671	-0.0222399	0.306612	0.04913	0.023219	-0.108819	0.00650042	-0.1303	0.166485	0.0664558	0.0581627	-0.0909063	0.749396	0.015359	0.0120147	0.120336	0.13408	0.0719472	0.148984	-0.0693089	0.847123	-0.00927006	0.0962929	0.0798418	0.302555	-0.0495434
ESCA	ADSS2	0.646022	-0.0521364	0.176033	0.152793	0.0209719	0.257776	0.438487	0.0878346	0.18319	0.150329	0.531691	0.0709534	0.104441	-0.182878	0.637309	-0.0535157	0.506733	-0.0753097	0.830838	0.0242626	0.374007	0.100725	0.379493	-0.0995791	0.620307	-0.0562303	0.970486	0.00420271	0.281126	-0.12197	0.0136409	0.274767	0.786135	-0.0308138	0.253691	0.129113	0.449139	-0.0858128	0.178271	-0.152015	0.569266	0.0645809	0.690292	0.0452382
HNSC	ADSS2	0.000194973	-0.167535	0.00193139	0.139739	0.615966	-0.022714	0.463835	-0.0331687	0.505491	-0.0301514	0.675997	0.0189269	0.978023	-0.00124766	0.0460975	-0.090149	0.606985	-0.0232938	0.234856	0.0537642	0.935506	-0.00366492	0.0899755	-0.0766791	0.0271351	-0.0998237	0.932745	0.0038222	0.729163	0.0156806	0.977132	-0.00129825	0.03441	0.0955818	0.254271	-0.0515991	0.000973542	-0.148543	0.963367	-0.00208019	0.905098	0.00539971	0.832521	0.00957744
KIRC	ADSS2	0.292917	-0.0467532	0.0452487	0.0888823	0.26844	-0.0491917	2.16583e-05	0.187226	0.366642	0.0401371	0.0748602	-0.0791043	0.122969	0.0685226	0.000122552	0.169597	0.90795	0.00514266	0.130917	0.0671072	0.434311	0.0347635	0.00114377	0.143911	0.00227753	-0.135097	0.0936171	-0.0744681	0.985742	0.000794848	0.0903684	0.0752139	0.401141	0.0373295	NA	NA	0.0449953	-0.0889868	0.0033317	-0.130002	0.00270393	0.13282	3.73489e-15	-0.339319
LIHC	ADSS2	0.0347936	0.110522	0.0682373	0.0955523	0.765398	-0.0156718	0.0286127	0.114582	0.00413479	0.149768	4.63237e-05	0.211522	0.666744	-0.0226144	0.216298	-0.0648721	0.377703	-0.0463072	0.627701	0.0254675	0.302967	-0.0540634	0.42655	0.041743	0.151168	-0.0752848	0.439907	0.0405491	0.347596	-0.0493024	0.569202	0.0298906	0.123479	0.08077	0.172063	0.0716328	1.50749e-05	-0.224391	0.0908986	0.0886238	0.000193172	-0.193931	0.287527	-0.0558175
LUAD	ADSS2	0.163884	-0.0621046	0.140348	-0.0657715	0.0624863	0.0830398	0.0337674	0.0945815	0.00187807	0.138158	0.599397	-0.0234523	0.916397	0.00468752	0.0109284	0.113279	0.811677	-0.0106392	0.0295839	0.0969221	0.0115216	0.11246	0.179495	0.0598864	0.441831	0.0343338	0.827698	-0.00971905	0.0330721	-0.0949527	0.997729	0.000127097	0.143572	0.0652427	NA	NA	0.0132904	-0.110222	0.919856	-0.00449286	0.145597	-0.0649153	0.359195	-0.0409265
LUSC	ADSS2	0.00125375	-0.148391	0.334978	0.0445688	0.967264	0.00189811	0.000156804	0.173498	0.000909055	0.152524	0.331036	-0.0449334	0.0398201	0.0948569	0.000954875	0.151898	0.589327	-0.0249622	0.515825	0.030046	0.385582	0.0401128	0.305859	-0.0473308	0.0143804	-0.11284	0.00442976	0.13105	0.00232223	-0.140162	0.359277	0.0423801	0.697046	0.0180041	0.455505	-0.0345044	0.994123	-0.000340687	0.760747	-0.0140823	0.10298	-0.0753066	0.0547679	-0.0886574
PAAD	ADSS2	0.897511	0.00977856	0.80974	-0.0182767	0.693635	0.0298998	0.237768	0.0894488	0.084138	0.130562	0.627424	0.0368352	0.0444339	0.15171	0.482791	0.0532435	0.681386	-0.0311626	0.127363	0.115358	0.548016	-0.0455835	0.0257409	0.1681	0.0871689	-0.129315	0.902061	-0.00934227	0.578872	0.0421187	0.960462	0.00376359	0.0650495	0.139379	0.365275	-0.0686527	0.0477857	-0.149419	0.459122	-0.0561578	0.124796	-0.116137	0.428972	-0.059994
PRAD	ADSS2	0.154084	-0.0653596	0.000503862	0.158685	0.777828	0.0129522	2.28203e-06	0.21446	0.377928	0.0404608	0.233761	0.0546222	1.99528e-09	0.270222	0.107141	-0.0738639	0.375259	-0.0406876	0.797052	0.0118053	0.104526	-0.0744179	0.0351388	0.0964897	1.63853e-05	-0.195903	0.12782	0.0698203	0.00658173	-0.12426	0.0493916	0.0900335	0.000690282	0.154842	NA	NA	0.000193905	-0.169844	0.99546	0.000261201	0.332749	0.0444434	2.96394e-05	-0.18997
READ	ADSS2	0.187771	0.105674	0.0391456	0.164807	0.182903	0.106844	0.935585	-0.00650209	0.349605	-0.0751443	0.104822	0.129932	0.347352	0.0754955	0.0678824	-0.146098	0.894412	0.0106775	0.563606	0.0464352	0.00524558	-0.221781	0.299568	-0.0833121	0.0254228	-0.178358	0.148364	-0.115887	0.328438	0.078501	0.254482	0.0914847	0.862244	-0.0139591	NA	NA	0.00344683	-0.232083	0.454303	0.0601443	0.12567	0.122738	0.00887798	-0.208207
STAD	ADSS2	0.0351071	-0.109585	0.244877	0.0606049	0.137353	-0.0773848	0.449707	-0.0394157	0.157306	0.0736695	0.000355713	0.18467	0.2685	0.0576727	0.71056	-0.0193564	0.188682	0.0684885	0.0671818	-0.0952667	0.00028166	-0.187752	0.038069	0.107878	0.000694965	-0.175542	0.000947063	0.171169	0.0958738	-0.0866997	0.110359	0.0831398	0.000726427	0.174922	0.492106	-0.0358232	0.00223776	-0.158442	0.016267	0.124853	0.980272	-0.0012899	0.000840857	-0.172862
THCA	ADSS2	0.00538037	-0.124927	3.34594e-05	0.185314	3.8009e-09	0.260913	0.0155505	0.108692	0.341574	0.0428357	9.28522e-06	0.197785	0.0249993	-0.100742	0.0738968	0.0804042	0.458218	0.0334159	0.105807	0.0727812	0.0834094	-0.077892	0.862252	0.00781826	0.00202896	-0.138386	0.316652	0.0450989	4.93827e-05	-0.181361	0.0962953	-0.0748345	0.0103239	0.115186	NA	NA	9.99086e-09	-0.25399	0.00620754	-0.122846	0.582738	-0.024752	0.389447	0.0387655
UCEC	ADSS2	0.774347	-0.0125298	0.0172717	0.103777	1.48235e-08	0.243789	0.499	-0.0295417	0.00087521	0.144681	0.163041	-0.0609097	0.555988	0.0257304	0.00125231	0.140327	0.843463	0.00863029	0.832766	-0.00922859	0.00905775	-0.113697	0.338239	0.0418368	0.0771121	-0.0771437	0.27649	-0.0475357	0.187776	-0.0575214	0.282037	0.046991	0.00134665	0.13943	NA	NA	1.44514e-07	-0.226864	2.80657e-07	0.221675	1.57749e-05	0.187037	1.94461e-23	-0.416078
BLCA	AMPD2	0.629799	0.0242644	0.470265	-0.0363411	0.039608	-0.103328	0.305945	0.0515097	0.413252	0.0411759	0.0590116	0.0948467	0.734858	0.0170499	0.592053	-0.0269744	0.00017663	0.187146	0.036013	-0.105274	0.602118	0.0262444	0.00792865	0.133082	0.138495	-0.0744818	0.0485361	0.0990729	0.778104	0.0141867	0.596369	-0.0266607	0.703829	0.0191381	0.829702	-0.0108285	0.74396	-0.016443	0.182142	-0.0670971	0.97357	0.00166805	0.112703	-0.0797317
BRCA	AMPD2	0.0334428	0.0712975	0.00258374	-0.100892	0.891436	0.00458147	0.189743	-0.0439967	0.489378	-0.0232019	0.00599474	0.0920492	0.653222	-0.0150806	0.306834	0.0342919	0.133087	0.0503873	3.8535e-08	-0.182974	0.0933657	0.056278	0.0842013	0.0579157	0.112778	-0.0531942	0.0831697	0.0581089	0.00274741	-0.100269	0.456232	0.0250059	0.0790858	-0.0588934	0.135609	0.0500625	0.628902	0.0162211	0.0719991	0.0603366	2.67723e-06	-0.156596	0.000100598	0.129994
CESC	AMPD2	0.575436	0.0358796	0.705797	0.0241886	0.0122989	-0.159404	0.961383	0.00310279	0.42891	0.0506617	0.218703	0.0787	0.32798	0.0626248	0.164293	0.0889499	0.15967	0.0899311	0.970033	-0.00240746	0.251051	-0.0734563	0.792611	-0.0168479	0.192168	-0.0834322	0.706341	0.0241418	0.531711	-0.0400618	0.892568	-0.00865471	0.531189	0.0401128	NA	NA	0.131715	-0.0963737	0.0524293	-0.123818	0.199242	0.0821266	0.0875484	-0.109159
CHOL	AMPD2	0.906671	0.0205616	0.13981	-0.254687	0.267596	-0.192624	0.107019	0.277132	0.169077	0.237732	0.0504592	0.333217	0.580748	0.0966454	0.328816	-0.170028	0.0341963	0.358974	0.00494323	-0.464445	0.684701	-0.0711325	0.0229292	0.383571	0.772995	-0.0505638	0.462797	-0.128255	0.326163	-0.170949	0.103769	-0.279626	0.569804	-0.0994398	0.496441	-0.118866	0.0145656	-0.409524	0.934965	0.014312	0.198504	0.22269	0.894506	-0.0232558
COAD	AMPD2	0.0591602	0.0905494	0.137121	0.0713914	0.940403	-0.00359494	1.32992e-07	-0.249605	5.68859e-06	-0.215619	9.81125e-09	0.270557	0.291574	-0.0506811	8.03186e-05	-0.187927	NA	NA	0.196787	-0.0620061	0.889314	0.00669199	4.4009e-05	-0.194563	0.00671948	-0.129779	0.0647543	0.0886352	0.0194396	-0.11202	0.381711	-0.0420434	0.299524	-0.0498546	0.07591	0.0851916	0.0353376	-0.100934	0.588828	-0.0259871	0.922825	-0.00465822	0.0172076	0.114175
ESCA	AMPD2	0.500641	-0.0763896	0.667127	0.0488258	0.840725	-0.0228249	0.464092	0.0830193	0.555342	0.0669179	0.13887	0.166934	0.350323	-0.105792	0.815942	-0.0264356	0.952377	-0.00678381	0.721602	-0.040458	0.387836	0.0978558	0.552835	-0.0673417	0.486665	-0.0788934	0.818764	-0.0260233	0.243417	-0.131923	0.39664	0.0960612	0.737505	0.0380574	0.272196	0.124241	0.0509452	-0.219023	0.210903	-0.141397	0.696495	0.0442852	0.83712	0.0233487
HNSC	AMPD2	0.0952373	-0.0754557	0.500165	-0.0305295	0.00565107	-0.124846	0.000126155	-0.172338	0.536393	-0.027997	1.18072e-09	0.270352	0.000357275	-0.160628	0.0267231	0.100092	0.00793556	0.119805	0.0121621	-0.113198	0.391948	-0.0387587	0.490707	-0.0312063	0.000203997	-0.167029	0.11722	0.0708616	0.00651743	-0.12275	0.000421382	-0.158697	4.294e-05	0.183709	0.912661	-0.00496759	5.17772e-09	-0.259998	4.10147e-06	-0.206369	0.265782	-0.0503692	0.409349	-0.0373539
KIRC	AMPD2	0.555414	0.0262223	0.00364508	-0.128772	0.000335721	-0.158489	0.668055	0.019071	0.00129871	-0.142322	0.881562	0.00662656	0.173459	0.060486	0.688454	0.017832	0.116923	0.0696479	0.000130523	-0.168923	0.111157	0.0707642	0.014288	0.108644	0.0247424	-0.099621	0.530501	-0.0278926	0.256858	0.0503986	0.416996	0.0360881	0.566928	0.0254628	NA	NA	0.465247	0.0324703	0.0257511	0.0989387	0.203586	-0.0565034	0.0403781	0.0909833
LIHC	AMPD2	0.402896	0.0439118	0.915607	0.00556569	0.343311	0.0497418	0.231532	-0.0627772	0.00040616	0.184132	0.100575	0.0860857	0.0521874	0.101712	0.0196218	0.122103	0.246625	0.0607956	0.0833077	0.0907711	0.0327758	0.111775	0.35015	0.0490422	0.681455	-0.0215569	0.236015	0.0621793	0.702603	-0.0200516	0.502021	0.0352481	0.00363087	-0.151878	0.393752	0.0447705	0.00191739	-0.161888	0.314967	0.0527408	0.346092	-0.0494562	0.0298944	-0.113682
LUAD	AMPD2	0.717636	0.0161469	0.363842	-0.0405326	0.0534537	-0.0860782	0.650202	0.0202479	0.177203	0.0602028	0.0111342	0.11299	0.636996	0.0210702	0.0277717	0.0980251	0.311358	0.045184	0.712093	-0.0164785	0.0322179	0.0954179	0.986512	-0.000754925	0.693015	0.0176267	0.299128	0.04634	0.0361085	-0.0933779	0.0368404	-0.0930152	0.622241	-0.0219976	NA	NA	0.0157188	-0.107544	0.784273	0.0122239	0.0209523	-0.102827	0.00138179	0.142099
LUSC	AMPD2	0.213972	0.0574279	0.0442205	-0.0928531	0.0917452	-0.0778707	0.232106	-0.055224	0.151994	-0.0661811	0.000139389	0.174818	0.098157	-0.0763786	0.253444	0.0527814	0.839433	-0.00937085	0.422456	-0.0370873	0.508693	0.0305581	0.707069	-0.0173791	0.238636	-0.0544604	0.159965	0.0649211	1.43698e-05	-0.198635	0.0800471	-0.0808236	0.00145433	0.146448	0.0244003	0.103816	0.48843	-0.0320339	9.6102e-05	-0.178927	3.28041e-05	-0.19032	0.191328	0.0603775
PAAD	AMPD2	0.508602	-0.0501519	0.544713	0.0459599	0.887032	0.0107848	0.0661332	0.138826	0.487607	0.0526602	0.0744191	-0.134822	0.251823	-0.0868334	0.00451717	0.213096	0.583766	0.0415773	0.731188	0.0260772	0.641751	0.0353104	0.0202395	0.174913	0.984974	0.0014298	0.0226823	-0.171712	0.323284	-0.0748821	0.436021	-0.0590837	0.248578	0.0874281	0.254717	-0.0863075	0.839136	-0.0154105	0.313751	-0.0763676	0.40018	0.0638053	0.133366	-0.113582
PRAD	AMPD2	0.2009	-0.0586644	0.658161	0.0203097	0.0872733	0.0783788	0.47314	0.032924	0.651604	-0.0207265	0.833608	-0.00964382	0.946463	0.00308263	0.593197	0.0245204	0.685918	0.0185634	0.571997	0.0259384	0.0423676	0.0929848	0.185493	0.0607265	0.227773	-0.055327	0.225583	0.0555882	0.00681019	-0.123747	0.269082	-0.0507031	0.0244234	0.103035	NA	NA	0.69813	-0.0178035	0.965219	0.00200182	0.948976	-0.00293771	0.0924697	0.0771245
READ	AMPD2	0.0243113	0.179713	0.498855	0.0543686	0.0950378	0.133702	0.38965	-0.0691259	0.00248678	-0.239801	0.000495578	0.274809	0.804758	-0.0198852	0.219966	-0.0984434	0.90804	0.00929282	0.562662	0.0465475	0.0519842	-0.155388	0.083351	-0.138634	0.24182	-0.0939562	0.987897	0.00122042	0.273623	-0.0879044	0.358881	-0.0737137	0.707035	0.0302301	NA	NA	0.00628481	-0.217206	0.839029	0.0163415	0.906043	-0.00949553	0.820921	0.0182095
STAD	AMPD2	0.930429	0.00455417	0.0135992	0.128193	0.0976334	-0.0862454	0.144772	-0.0759582	0.093111	-0.0874266	1.31658e-06	0.248365	0.0495587	-0.102169	0.0555351	-0.0996281	0.176899	0.0703531	0.411574	-0.0428136	0.145136	-0.0758896	0.686364	0.0210612	0.040169	-0.106735	0.00930053	0.135046	0.456988	-0.0387858	0.0153331	-0.125963	1.28157e-06	0.248631	0.123689	0.0801758	6.35126e-05	-0.206373	0.709055	-0.0194619	0.00214596	-0.159084	0.746406	0.0168677
THCA	AMPD2	0.0130119	0.111556	0.830001	-0.00967431	0.810576	0.0107999	0.124957	0.0690536	0.771205	-0.013103	0.0996434	0.0740941	0.225979	-0.054518	0.201624	0.057492	0.730173	0.0155402	0.167264	0.0621706	0.746912	-0.0145409	0.564488	-0.025959	0.77363	-0.0129602	0.531928	0.0281602	0.539242	-0.0276601	0.152436	-0.0644138	0.29687	-0.0469798	NA	NA	0.0639127	-0.0833424	0.382653	0.0393235	0.120746	-0.0698329	0.463371	0.0330342
UCEC	AMPD2	0.038242	0.0903845	0.549292	-0.0261676	9.37075e-06	0.191868	0.000126879	-0.166333	0.964325	0.00195481	0.943943	0.00307317	0.0115996	0.109983	0.000510376	0.151018	0.228862	-0.0525549	0.503829	0.0292103	0.587748	-0.0236898	0.609596	-0.0223157	0.652647	0.0196697	0.856523	-0.00790204	0.0648574	-0.0805607	0.182089	-0.0582697	0.400623	-0.0367229	NA	NA	0.00441737	-0.123938	0.229507	0.0524823	0.0218571	0.09996	1.64274e-07	-0.225872
BLCA	APRT	0.443976	0.0385264	0.0794613	-0.0881283	0.471433	0.0362457	0.00528071	0.139749	0.403179	0.0420695	0.134088	-0.0753218	0.109287	-0.0804957	0.166069	-0.0696436	0.409553	0.0415026	0.391695	-0.0431048	0.0444205	0.100945	0.0371037	-0.104667	0.659421	0.022186	0.760211	-0.0153653	0.78986	0.0134166	0.177936	-0.0677468	0.740805	-0.0166531	0.208716	0.0632285	0.388288	0.0434155	0.461722	0.0370436	0.644828	-0.0232049	0.137293	0.0747089
BRCA	APRT	0.133884	0.0502841	0.00139304	-0.106976	0.197401	0.0432477	0.0013416	-0.107337	0.054316	-0.0645264	4.1635e-06	0.153594	0.663112	0.0146218	0.980236	-0.000831544	0.57394	-0.0188718	4.36515e-10	-0.207195	0.128667	-0.0509682	0.339624	-0.0320454	0.087319	0.0573431	0.851895	-0.00626698	0.630091	0.0161649	0.481012	0.0236507	7.6217e-15	-0.256562	0.382413	0.0293133	0.0518973	0.0651848	0.000130844	0.127863	0.11961	-0.0522089	3.71268e-14	0.250078
CESC	APRT	0.0803281	0.111718	0.480548	-0.0451832	0.694568	-0.0251595	0.848859	0.0122124	0.133045	0.0960444	0.676495	0.0267344	0.26247	-0.0717183	0.0114522	0.160984	0.178073	0.0861423	0.894778	0.00847562	0.85134	-0.0120095	0.974128	0.00207832	0.251007	0.073463	0.911933	0.00708762	0.104573	-0.103733	0.695181	0.0251063	0.112869	-0.101339	NA	NA	0.247412	-0.0740216	0.445855	-0.0488249	0.262341	-0.0717377	0.938759	0.00492355
CHOL	APRT	0.852704	-0.0325581	0.597871	0.0923198	0.351084	0.162469	0.662676	-0.0764016	0.202509	0.220767	0.568658	0.0997339	0.53423	-0.108699	0.291386	0.183486	0.633765	0.0834212	0.0930087	-0.288333	0.722121	0.0623164	0.342613	-0.165309	0.343709	-0.164939	0.330839	-0.169328	0.650694	0.0792959	0.615352	-0.0879589	0.306622	0.177884	0.240317	0.203785	0.639255	-0.0820786	0.782182	-0.0484658	0.557414	0.102633	0.277232	-0.188862
COAD	APRT	0.530708	-0.0301387	0.259296	0.0542023	0.748187	0.0154357	0.0427545	-0.0971936	0.0178925	-0.113489	0.0207821	0.110825	0.933485	0.00401315	0.00123259	-0.154439	NA	NA	0.268354	-0.0531854	0.0811825	0.083706	0.000243212	-0.175073	0.742884	0.0157725	0.679858	0.0198405	0.026073	-0.106689	0.597319	-0.0253971	0.532597	-0.0300003	0.285924	0.0512776	0.9891	-0.000656909	0.421969	-0.0385981	0.143487	0.0702574	0.128211	0.0730483
ESCA	APRT	0.24577	0.131272	0.386185	-0.0981951	0.344933	0.106974	0.839856	0.0229512	0.26669	-0.125667	0.948903	0.00727938	0.55575	-0.0668491	0.648574	0.0517338	0.650371	0.0514507	0.254716	-0.128837	0.927271	0.0103681	0.308393	0.115317	0.0368557	0.233808	0.200275	-0.144717	0.394748	0.0964447	0.186155	0.149328	0.00103055	-0.360213	0.291591	-0.119368	0.0694521	0.204046	0.121092	0.174732	0.204226	0.143468	0.357673	-0.104197
HNSC	APRT	0.260987	0.050877	0.00654837	-0.12268	0.578646	0.025149	0.477468	0.0321656	0.464664	0.0331072	0.204708	0.0573932	0.00323386	-0.132773	0.232749	0.0540067	0.0302264	0.0979148	0.0797711	-0.0792259	0.301611	0.0467594	0.0140282	0.110916	0.00162142	0.142034	0.0843134	-0.0780616	0.979979	0.00113657	0.081135	-0.0788708	0.000528425	-0.156013	0.0275154	0.0995791	0.622915	-0.0222679	0.68068	0.0186373	0.340131	-0.0431833	0.370673	0.0405285
KIRC	APRT	0.0759394	0.0788134	1.02454e-05	-0.194357	0.768671	-0.0130809	0.783883	0.012198	0.537816	-0.0273982	0.0375211	0.0923175	0.295752	-0.0464798	0.00735156	-0.118799	0.0625645	-0.0826872	0.106295	-0.0717416	0.218814	-0.0546525	0.677388	-0.0185023	5.80874e-07	0.219557	0.00425836	-0.12662	0.0171316	0.105731	0.788564	0.0119273	2.26605e-06	-0.20799	NA	NA	1.88566e-05	0.188565	0.000262035	0.161287	0.422418	0.0356699	2.6314e-10	0.275595
LIHC	APRT	0.932485	-0.00444964	0.00683795	-0.141341	0.215486	0.0649867	0.0826518	-0.090964	0.0219002	0.119952	0.000483557	0.181759	0.0323592	-0.112041	0.0495203	0.102885	0.637597	-0.0247376	0.723971	-0.0185471	0.491019	-0.0361599	0.0840736	-0.0905475	0.0786839	0.0921577	0.195687	0.0678824	0.41125	0.0431374	0.820052	-0.0119473	0.00600304	-0.143563	0.310519	0.0532271	0.216664	-0.0648205	0.493804	0.0359281	0.70592	-0.019817	0.0368752	0.109294
LUAD	APRT	0.245826	-0.0517887	0.510814	-0.0293571	0.018259	0.105107	0.287328	0.0474856	0.687245	0.0179762	0.1654	-0.0618824	0.335856	-0.0429549	0.252247	0.0510919	0.484206	-0.0312305	0.333548	0.0431604	0.0115901	0.112368	0.137418	-0.0662601	5.07109e-06	0.20161	0.124161	-0.0685771	0.629141	-0.0215628	0.0749152	-0.0794032	0.00388948	-0.128383	NA	NA	0.697662	0.017346	0.000946682	0.146823	0.535179	-0.0276858	0.000418378	0.156577
LUSC	APRT	0.0382692	-0.0956079	0.0963615	-0.0767884	0.0184406	0.108671	1.10235e-05	0.201233	0.00201654	0.142084	0.0289746	-0.100745	0.568076	0.0263988	0.00284752	0.137342	0.55584	0.0272375	0.630384	-0.022252	0.0164735	0.110578	0.060285	0.0867257	0.690678	-0.0184028	0.151087	0.0663276	0.31688	-0.0462661	0.557227	-0.027142	0.245631	-0.0536585	0.200456	0.0591595	0.782076	0.0127928	0.233247	-0.0550894	0.996557	-0.000199587	0.117986	-0.0722069
PAAD	APRT	0.544818	-0.0459479	0.930879	-0.00658506	0.442342	0.0582747	0.878888	0.011568	0.213072	0.0943203	0.040793	0.154369	0.81813	-0.0174563	0.485822	-0.052876	0.868949	0.0125256	0.967878	0.00305719	0.0470343	-0.149921	0.811115	0.0181422	0.475259	0.0541623	0.0241274	-0.169957	0.0231742	0.171104	0.039538	-0.155332	0.00647257	-0.204524	0.58374	0.0415802	0.387926	-0.0654767	0.226817	0.0915625	0.988659	-0.00107913	0.00336302	0.219896
PRAD	APRT	0.508521	-0.0303443	0.00186756	-0.142071	0.900679	-0.00572936	0.00130485	-0.146788	0.862621	0.0079436	0.091235	0.0774173	0.000488961	-0.159046	0.308132	0.0467608	1.30455e-05	-0.198138	0.00315168	0.134923	0.777736	-0.0129578	0.0911252	-0.0774435	0.00468985	0.129262	0.195043	-0.0594343	0.000107494	0.176404	0.128926	-0.0696188	8.45259e-05	-0.179011	NA	NA	0.588181	0.0248537	0.342214	-0.043582	0.114255	-0.0724087	0.196639	0.0592229
READ	APRT	0.747042	0.0259447	0.635062	-0.0381696	0.101174	0.131304	0.49496	0.0548621	0.242462	-0.0938287	0.436365	0.0625578	0.782344	0.0222233	0.349898	-0.0750988	0.857201	0.0144755	0.8943	0.0106889	0.458966	0.0595257	0.0107438	-0.203083	0.85512	-0.0146888	0.549169	-0.048163	0.198969	0.103064	0.995253	0.00047868	0.60964	-0.0410602	NA	NA	0.027678	-0.175759	0.11523	-0.126213	0.504459	0.0536619	0.176633	-0.108385
STAD	APRT	0.661086	-0.0228665	0.18978	-0.0683191	0.592595	-0.0279065	0.761726	-0.0158159	0.00508942	-0.145351	4.11219e-05	0.211504	0.47621	0.0371494	0.161263	-0.0729758	0.0646757	0.0961493	0.00769748	-0.138351	0.0214453	-0.119549	0.253667	0.0594919	0.261608	0.058509	0.857878	0.00934115	0.387686	0.0450375	0.758277	0.0160522	0.458933	-0.0386185	0.663907	0.0226637	0.737286	0.0174971	0.185342	0.0690082	0.0116981	-0.130945	0.337762	0.0499731
THCA	APRT	0.00684435	0.121407	0.000299501	-0.161851	0.50228	-0.0302245	0.0370588	-0.0937495	0.705185	-0.0170465	0.890845	0.00618384	0.115376	-0.070858	0.352312	0.0418931	0.208411	0.0566384	0.30121	0.0465603	0.0773476	0.0794641	0.120237	-0.0699284	0.0173509	0.1069	0.1085	0.0722265	0.527469	0.0284668	0.00485246	-0.126411	0.0323298	-0.0962197	NA	NA	0.0565092	0.085776	0.166669	-0.0622578	0.03372	-0.0954632	0.0119483	0.112905
UCEC	APRT	0.925799	-0.00407038	0.000246118	-0.159215	0.575915	0.0244438	0.210681	-0.0546657	0.885333	-0.00630287	0.269151	-0.0482679	0.103552	0.0710579	0.000491156	0.151459	0.755629	-0.0136018	0.258028	0.0494041	0.60022	0.0229027	0.665097	-0.0189181	0.0243769	0.0981506	0.581869	-0.0240636	0.0967621	0.0724896	0.0607219	0.0818338	0.00104312	-0.142563	NA	NA	0.270604	0.0481219	0.0029455	0.129407	0.404441	0.0364263	0.00173633	-0.136248
BLCA	ATIC	0.247491	-0.0581755	0.109499	-0.0804476	0.434042	-0.0393711	0.338438	0.0481673	0.935984	0.00404379	0.666181	0.0217171	0.0333234	0.106841	0.600476	-0.0263631	0.0555452	0.0961708	0.153823	-0.0717107	0.0673671	-0.0919012	0.59933	0.026446	0.671034	-0.0213815	0.0436975	0.101288	0.32071	-0.0499636	0.0131819	0.124317	0.743472	-0.0164755	0.102111	-0.0821639	0.458111	0.0373427	0.779896	-0.0140691	0.65317	0.0226213	0.0145424	-0.122563
BRCA	ATIC	0.000232658	-0.123079	0.220279	0.0411289	0.783821	0.00920874	0.493155	-0.0230006	0.541911	0.0204714	0.48494	0.0234395	0.0589141	0.0633393	0.000393139	0.118564	0.123527	0.0516636	0.342869	0.0318309	0.608331	-0.0172005	0.00647743	0.091199	7.4568e-05	-0.132382	0.0620903	0.0625634	0.503924	-0.0224311	0.512805	0.0219663	0.0103601	0.085893	0.0323181	0.0717565	5.72657e-07	-0.166668	0.777686	0.00947702	0.424213	0.0268199	0.00123102	-0.108157
CESC	ATIC	0.119874	-0.0994229	0.0891821	0.108603	0.0092895	-0.165545	0.057019	-0.12151	0.16771	0.0882377	0.665052	0.0277398	0.761532	-0.0194457	0.923953	-0.00611708	0.0759733	0.113353	0.563484	-0.0370071	0.704289	-0.0243187	0.842402	-0.0127408	0.634987	-0.0304149	0.116798	0.100253	0.266994	-0.0710441	0.157435	0.0904132	0.657956	-0.0283667	NA	NA	0.909669	-0.00727061	0.982838	-0.00137854	0.361763	-0.0583955	0.0695872	-0.115894
CHOL	ATIC	0.643253	-0.0811039	0.961694	0.00842403	0.195618	-0.224093	0.821536	0.0395496	0.329449	-0.169809	0.000934284	0.534771	0.636962	-0.0826388	0.937625	-0.0137255	0.712102	0.0646613	0.153607	-0.246403	0.352804	0.161897	0.0238955	0.381111	0.460177	0.129001	0.347277	-0.16374	0.173899	-0.235147	0.171505	-0.236424	0.375141	-0.154622	0.282634	-0.18679	0.0143449	-0.410364	0.90994	-0.0198384	0.467648	0.126879	0.296559	0.181563
COAD	ATIC	0.565915	0.0275991	0.00382563	0.1384	0.0668749	0.0879451	0.000939275	-0.158068	0.00432889	-0.136549	0.00996317	0.123445	0.145712	-0.0698704	3.11752e-05	-0.198267	NA	NA	0.127678	-0.0731503	0.0315408	0.103115	4.23427e-06	-0.21849	0.023993	-0.10822	0.0620045	0.0895583	0.0639148	-0.0889135	0.123759	0.07391	0.838755	0.00978434	0.317202	0.0480677	0.447039	-0.0365495	0.794569	-0.0125199	0.418917	0.0388522	0.675053	0.0201562
ESCA	ATIC	0.813788	-0.0267508	0.717748	0.0410425	0.170425	0.154775	0.218121	-0.13921	0.699286	-0.0438574	0.021293	0.257156	0.174201	-0.153435	0.973984	-0.00370446	0.0898475	0.190897	0.0389683	-0.23132	0.593477	-0.0605797	0.701219	0.0435615	0.514695	0.0739084	0.835789	0.0235423	0.516687	-0.0735595	0.210467	0.141531	0.740938	0.0375412	0.188334	0.148601	0.0655296	-0.206922	0.873074	-0.0181452	0.694072	0.0446571	0.16875	-0.155377
HNSC	ATIC	0.199165	-0.0581016	0.461967	-0.0333074	0.0708823	-0.0816694	0.00534471	-0.125657	0.478663	-0.0320784	0.788873	0.0121274	0.102707	0.0738084	0.128418	0.0687776	0.210394	0.0566806	0.146755	-0.0656504	0.08019	0.0791163	0.176538	-0.0611532	0.467826	0.0328733	0.0442264	0.090934	0.0648523	-0.0834738	0.32904	0.0441847	0.262586	0.050707	0.290419	0.0478544	0.233429	-0.0539283	0.237994	-0.053406	0.355076	-0.0418662	0.259114	-0.0510771
KIRC	ATIC	0.173527	0.0604764	0.000904636	-0.146803	0.0203288	-0.102923	0.000642895	0.150924	0.247204	-0.0514337	0.569499	0.0252942	0.263702	0.0496809	0.0673074	0.081242	0.785653	-0.0120956	0.00340723	-0.129697	0.954892	0.00251583	0.00125266	0.142775	0.085268	-0.0764294	7.15626e-09	-0.253194	0.0027402	0.132642	0.000290097	0.160144	0.000738293	-0.149267	NA	NA	0.00754978	0.118406	0.434809	0.0347259	0.00161815	0.139534	0.70109	-0.0170714
LIHC	ATIC	0.212496	0.0654113	0.200384	-0.067177	0.794169	-0.0137025	0.0733858	0.0938301	0.0013484	0.167173	3.74946e-13	0.368064	7.74031e-05	-0.205368	0.451147	-0.0395605	0.606978	-0.0270123	0.0668917	-0.0960199	0.22066	-0.0642618	0.551218	0.0312924	0.258462	-0.0593	0.452333	-0.039457	0.304762	-0.0538635	0.0117052	0.131826	0.00402067	-0.150225	0.507214	0.0348215	0.0278978	-0.115098	0.1629	0.0731908	0.0458715	-0.104577	0.0293517	0.114059
LUAD	ATIC	0.000374936	-0.157844	0.228389	0.0537482	0.127249	0.0680209	0.575437	-0.0250054	0.167716	0.061546	0.99684	-0.000176879	0.0386041	0.0921657	0.27257	0.0489638	0.823298	-0.00997131	0.613444	-0.0225549	0.153564	0.0636597	0.539379	-0.0274016	0.000621508	0.151922	0.466019	-0.0325431	0.0654565	-0.0821201	0.426248	0.0355171	0.52042	-0.0286934	NA	NA	0.956826	0.00241747	0.00174368	0.139121	0.0965192	-0.0741121	0.916544	-0.00467921
LUSC	ATIC	0.0589531	-0.0871782	0.70342	-0.0176063	0.971501	0.00165233	0.386687	0.0400196	0.04113	0.0942416	0.951801	-0.00279558	0.568134	0.0263948	0.38956	0.0397782	0.448895	-0.0350123	0.717718	0.0167186	0.0846268	0.0796286	0.213342	-0.0575068	0.203207	0.0588004	0.364586	0.0419144	0.00015009	-0.17399	0.935776	0.0037268	0.121546	0.0715176	0.387563	0.0399459	0.695034	0.0181299	0.398266	-0.0390533	0.015061	-0.112074	0.959018	0.00237656
PAAD	ATIC	0.31677	-0.075894	0.897234	0.00980511	0.421063	0.0610257	0.363446	0.0689143	0.405084	0.063145	0.197285	0.09765	0.224798	0.0919601	0.927643	0.00689413	0.558398	-0.0444075	0.213569	0.0942184	0.0377041	-0.156787	0.556347	0.0446389	0.67013	-0.0323307	0.372173	-0.067673	0.105004	0.122604	0.838891	-0.0154343	0.98242	-0.0016729	0.6558	-0.0338287	0.0765018	-0.133873	0.690888	-0.0301822	0.707372	-0.0284932	0.676517	0.031667
PRAD	ATIC	0.340561	-0.0437314	0.678982	-0.0189972	0.0129317	0.113739	0.245682	0.053256	0.242687	-0.0535948	0.890778	0.00630393	0.242482	0.053618	0.138094	0.0679983	0.0420057	-0.0931478	0.424137	0.0366797	0.69898	-0.0177508	0.317908	0.0458266	0.0546574	-0.0880436	0.881278	0.00685617	0.466823	-0.0333955	0.291369	0.0484094	0.672155	-0.0194258	NA	NA	0.402819	-0.0383918	0.355773	-0.042374	0.588693	-0.0248197	0.483041	0.0321919
READ	ATIC	0.406964	0.0666402	0.0341624	0.169178	0.0366759	0.166911	0.411635	-0.0659803	0.0158514	-0.192261	0.00628533	0.217204	0.929893	-0.00707803	0.0255701	-0.178183	0.982321	0.00178275	0.502281	0.053936	0.041462	-0.162933	0.0182684	-0.188177	0.166748	-0.110899	0.471659	-0.0578591	0.964015	-0.00362959	0.268031	0.0889321	0.986699	-0.00134118	NA	NA	0.00129789	-0.254494	0.485265	0.0560997	0.819717	0.018334	0.0101849	-0.204529
STAD	ATIC	0.000172981	-0.194038	0.842648	0.0103547	0.347347	-0.0489915	0.00363295	-0.150844	0.386655	0.0451353	2.1391e-06	0.243516	0.0843781	0.0898441	0.411115	-0.0428557	0.00279895	0.154975	9.01559e-07	-0.25208	8.93947e-07	-0.252162	0.507598	0.0345527	0.00218525	-0.158806	1.25251e-05	0.224938	0.467427	-0.0378925	0.00107919	0.169293	0.9616	-0.00251147	0.498019	-0.0353358	0.0499607	-0.10199	2.30895e-07	0.264984	0.596501	-0.0276124	0.00847396	-0.136681
THCA	ATIC	0.236685	-0.0532829	0.0504644	0.0879678	3.44285e-06	0.206924	3.76096e-14	0.33138	8.99929e-08	-0.237434	4.26946e-08	0.243186	0.663753	-0.0195877	0.874269	-0.00713024	0.391301	-0.0386142	0.00585814	0.123693	2.55596e-06	-0.209589	0.213359	0.0560285	0.000183572	-0.167364	0.217517	-0.0555239	0.139508	-0.0665089	0.335855	0.0433453	0.862606	0.00779798	NA	NA	1.28956e-08	-0.252128	0.00243713	-0.135946	0.748013	-0.0144754	1.58097e-05	0.192704
UCEC	ATIC	0.989026	-0.000601128	0.779832	-0.0122171	0.000271119	0.15815	0.295195	-0.0457273	0.238307	0.0515052	0.792807	-0.0114798	0.0680139	0.0796331	0.00079511	0.145827	0.820848	-0.0098972	0.540683	0.0267337	0.146552	-0.0633894	0.636197	-0.0206718	0.202933	0.0556052	0.106278	-0.070504	0.11908	-0.0680433	0.0151218	0.105883	0.123562	-0.0672309	NA	NA	0.200751	-0.0558745	2.77853e-05	0.181642	0.096718	0.0724992	1.68432e-14	-0.326131
BLCA	DCK	0.802518	-0.0125908	0.315284	0.0505262	0.404853	0.0419202	0.76876	-0.0148012	0.456323	0.0374913	0.394808	0.0428224	0.269294	0.0555752	0.000561667	-0.17237	0.199448	0.0645345	0.121954	-0.0777505	0.140273	-0.0741487	0.368203	0.0452815	0.121172	-0.0779133	0.058416	0.0950696	0.0122033	-0.12568	0.00553147	0.139002	0.975152	0.00156821	0.145705	-0.0731506	0.146958	0.0729245	0.000873517	0.166405	0.186419	0.0664477	0.00224555	-0.152939
BRCA	DCK	0.00458963	-0.0949317	0.00385721	0.0967685	0.313473	-0.0338248	0.527757	-0.0211931	0.0335332	0.0712612	0.189555	-0.0440154	1.02831e-05	0.147262	0.17977	0.0450064	0.00930746	0.0871272	0.0640894	-0.0620917	0.147687	-0.0485683	0.487317	0.0233121	6.01665e-10	-0.205558	0.116546	0.0526452	0.00826393	-0.0884803	1.03101e-09	0.20278	7.08898e-08	0.179421	0.374488	0.0298044	0.000671993	-0.113783	0.677727	-0.0139487	2.1548e-05	0.141879	2.98764e-09	-0.197172
CESC	DCK	0.894413	-0.00850523	0.000125693	0.242081	0.0064976	-0.17309	0.00175165	0.198544	0.945731	-0.00436208	0.227074	-0.0772932	0.0111018	0.161668	0.472159	-0.0460501	0.305068	-0.0656553	0.0332262	0.135824	0.336407	0.0615449	0.0420909	-0.129708	0.0259797	-0.141961	0.160866	-0.0896753	0.00276364	-0.190045	0.200182	0.0819556	0.0425575	0.129417	NA	NA	0.374269	0.056893	0.753326	0.0201368	0.136153	0.0952851	0.00638109	-0.173464
CHOL	DCK	0.785998	0.0475962	0.59594	0.0928048	0.0326065	0.361997	0.979293	-0.00455248	0.282634	0.18679	0.882536	-0.0259122	0.405115	-0.145248	0.509146	-0.115406	0.358772	0.159927	0.460573	-0.128888	0.0094666	-0.432485	0.677676	-0.0728062	0.0314308	-0.364311	0.917126	-0.0182497	0.543307	0.106309	0.943659	-0.0123954	0.97452	0.00560224	0.0926037	0.288675	0.977067	0.00504202	0.0571879	0.3245	0.795218	0.0455002	0.800641	-0.0442701
COAD	DCK	0.841233	0.00963195	0.00215056	0.146754	0.637877	0.0226291	0.685483	-0.0194721	0.523343	-0.0306804	0.219177	-0.059031	0.073979	0.0857567	0.790567	-0.0127695	NA	NA	0.569544	0.0273418	0.693468	0.018951	0.19587	-0.0621329	0.126021	-0.0734694	0.0864358	0.0823016	0.0126604	-0.119454	0.000405064	0.168842	0.0206961	0.1109	0.0730879	0.0860215	0.160591	-0.0673903	0.52897	0.0302661	0.00142801	0.152441	1.26972e-06	-0.229818
ESCA	DCK	0.219032	-0.138937	0.482227	0.0796963	0.471547	0.0816449	0.921827	0.0111467	0.99669	-0.00047125	0.286479	0.120631	0.900881	0.0141469	0.763627	-0.0341493	0.589414	0.0612458	0.997794	0.000314001	0.887976	0.0160001	0.368544	-0.101876	0.812015	0.0270102	0.745913	-0.0367948	0.845569	-0.022122	0.253898	0.129057	0.136069	0.16811	0.505551	-0.0755188	0.410277	-0.0933272	0.218928	-0.138968	0.706639	0.0427332	0.78689	0.0307022
HNSC	DCK	0.00288545	-0.134341	3.6211e-08	0.245649	0.473197	-0.0324781	0.0986157	-0.0746983	0.0373072	-0.0941041	0.000922156	-0.14922	0.0023933	0.136879	0.0389397	-0.0933139	0.223132	-0.0551335	0.51557	0.0294414	0.721175	-0.0161628	0.0404767	-0.0925952	0.00352061	-0.131593	0.247334	0.052359	0.20119	0.0578412	8.7529e-05	0.176274	0.449288	0.0342573	0.74488	-0.0147368	0.41679	0.036764	0.20141	0.0578129	0.0108948	0.114931	0.81242	0.0107475
KIRC	DCK	0.300706	-0.0460061	0.59772	0.0234667	0.585236	-0.0242701	3.30976e-07	0.224157	0.143236	0.0650391	0.000102415	-0.171504	0.0172942	0.105578	4.11999e-05	0.180879	0.677892	-0.0184717	0.166727	0.061445	0.0384845	0.0918582	0.000464724	0.154746	1.23956e-05	-0.192567	0.0252088	-0.0993026	0.329323	-0.0433663	0.00513621	0.123983	0.776074	-0.0126506	NA	NA	0.665062	-0.019254	0.00275398	-0.132575	2.30228e-09	0.261124	5.47042e-17	-0.359985
LIHC	DCK	0.0340375	0.110984	0.391553	0.0449787	0.243173	0.0612411	0.0508067	0.102313	0.0467008	0.104183	0.00204409	0.16091	0.035455	0.110125	0.0556591	-0.100259	0.299593	0.0544416	0.661686	0.0229801	0.139459	-0.0775014	0.0266608	0.11602	0.115642	-0.0824944	0.315758	-0.0526548	0.272812	-0.0575489	0.0584558	0.0991416	0.549261	-0.0314463	0.136421	0.0780999	0.000269338	-0.189608	0.0144698	0.12791	0.924133	-0.00500166	0.0191965	-0.122528
LUAD	DCK	0.00965417	-0.11518	0.368342	0.0401541	0.0678198	-0.0814126	0.00735383	0.119263	0.000268383	0.161651	0.348373	-0.0418563	3.27387e-06	0.205547	0.055287	0.0854288	0.828943	-0.00964768	0.373298	-0.0397407	0.939176	0.00340737	0.0415611	0.0908126	0.800784	-0.0112674	0.186887	-0.0588857	0.0490371	-0.0877224	5.33675e-08	0.239367	0.340194	-0.0425713	NA	NA	0.385004	0.0387773	0.587033	-0.0242501	2.41697e-05	0.186886	0.0439872	-0.0897619
LUSC	DCK	0.0551082	-0.0885337	0.000381102	0.163215	0.0197594	-0.10749	0.0246697	0.103622	0.000595573	0.157808	0.0003542	-0.164085	3.47867e-05	0.189715	0.000159029	0.173339	0.531345	-0.0289442	0.743951	-0.0151055	0.731485	0.0158696	0.0553373	0.0884508	0.000127645	-0.175799	0.478467	0.0327716	0.667195	-0.0198854	4.4431e-05	0.187173	0.546089	-0.0279123	0.203364	0.0587799	0.0640179	0.0855001	0.0546013	-0.0887182	0.0203857	0.106953	0.028425	-0.10109
PAAD	DCK	0.452248	-0.0570196	0.00572407	0.20749	0.888811	0.0106138	0.234968	0.0899825	0.0528877	0.146176	5.10185e-05	-0.300407	0.184082	0.100586	0.238433	0.0893225	0.275403	0.0826632	0.966977	0.00314305	0.411174	0.0623316	0.147474	0.109638	0.00163632	-0.235717	0.45287	-0.0569414	0.658668	-0.033528	0.000410371	0.26349	0.0346254	0.159368	0.0186192	0.177226	0.525046	0.0482249	0.547282	-0.0456669	0.143678	0.11067	0.00124401	-0.241473
PRAD	DCK	0.712218	-0.016933	2.4644e-05	0.191837	0.144187	-0.0669665	7.53204e-05	0.180248	0.600358	0.0240467	0.791082	-0.0121607	9.62062e-11	0.290707	0.0832027	0.0794041	0.33675	-0.0440774	0.722457	-0.0163041	0.175346	-0.0621545	0.0743845	0.0817725	0.000283543	-0.165488	0.738269	0.0153389	2.92186e-08	-0.250533	0.0463054	0.0912838	3.90984e-06	0.209556	NA	NA	5.00854e-06	-0.207261	0.26573	0.0510592	0.0214696	0.105276	0.000859271	-0.152116
READ	DCK	0.0352625	0.168169	0.302596	0.0827937	0.11367	0.126753	0.97707	-0.00231236	0.834507	-0.0168071	0.166373	0.110997	0.16789	0.110603	0.21748	-0.0989736	0.541183	-0.0491282	0.338212	0.0769345	0.0180111	-0.188589	0.132209	-0.120672	0.182611	-0.106915	0.16744	-0.11072	0.606342	0.041439	0.0974449	0.132747	0.949489	-0.00509648	NA	NA	0.00755121	-0.212467	0.979607	0.00205652	0.117289	0.125509	7.62778e-05	-0.310356
STAD	DCK	0.515234	0.0339339	0.933966	-0.00432211	0.360571	-0.0476653	0.604574	-0.0270074	0.460198	0.0385099	0.0944148	0.0870814	0.0551743	0.0997749	0.378484	-0.0459162	0.437993	0.0404411	0.00177379	-0.161972	3.36868e-05	-0.213817	0.666698	0.0224634	0.000355257	-0.184687	0.00581863	0.143118	0.118885	-0.0812138	1.66031e-06	0.24606	0.741812	0.0171844	0.112643	0.0826129	0.88828	-0.00732794	0.00144624	0.165015	0.0671887	0.0952643	0.0131683	-0.128785
THCA	DCK	0.0417137	-0.0915669	8.86363e-14	0.326742	0.172886	0.0613592	0.0652299	0.0829341	0.037112	-0.0937233	0.721834	0.0160409	0.00560157	0.124344	0.126315	-0.0688068	0.506297	-0.0299412	0.367311	-0.0406063	0.000419796	-0.157944	0.0793571	0.0789322	0.00123843	-0.144773	0.148815	-0.0649866	0.188252	0.0592371	0.0122373	0.112528	0.957015	0.00242876	NA	NA	0.3825	-0.0393362	0.628773	0.0217822	0.000783121	0.150482	0.34824	-0.0422484
UCEC	DCK	0.459585	-0.0323135	0.0187248	0.102481	0.00325905	0.128061	0.198957	-0.0560974	0.010876	0.11096	0.184634	-0.0579326	6.58682e-05	0.173101	4.77061e-05	0.17634	0.721896	0.0155552	0.664723	-0.0189406	7.31909e-06	-0.194119	0.467632	-0.0317373	0.0206842	-0.100865	0.151387	-0.0626412	0.80755	-0.010646	6.03522e-07	0.215529	0.361815	0.0398403	NA	NA	0.000970891	-0.143433	1.42533e-11	0.288928	4.14392e-09	0.252737	5.89544e-31	-0.474981
BLCA	DGUOK	0.986057	-0.000879884	0.594831	-0.0267723	0.0935249	0.0842867	0.421802	0.0404274	0.898096	-0.00644774	0.082377	-0.0872892	0.00598297	-0.13773	0.0797543	-0.0880428	0.137031	0.0747586	0.00661958	-0.136077	0.151198	0.0721699	0.053373	-0.0970358	0.950288	-0.0031389	0.458173	0.0373376	0.344724	0.0475449	0.218514	-0.0618924	0.218325	-0.0619178	0.91605	-0.00530711	0.102762	0.0820087	0.183132	0.0669458	0.924835	0.00475003	0.0863511	0.0861833
BRCA	DGUOK	0.0840818	0.057938	0.104736	-0.0544162	0.000460359	0.117175	0.980659	-0.000813773	0.0570147	0.06382	0.328162	0.032814	0.075847	0.0595393	0.281115	-0.0361675	0.0783482	0.0590386	2.9894e-15	-0.260311	0.161699	-0.0469474	0.57506	0.0188166	0.639131	0.0157392	0.991142	-0.000372673	0.686355	-0.013554	0.0217155	0.0769329	0.000700409	-0.113406	0.630134	-0.0161628	0.0105389	0.0856945	9.52678e-10	0.20319	0.338135	0.0321443	0.00943239	0.0869745
CESC	DGUOK	0.416124	-0.0520755	0.25111	0.0734471	0.846509	0.0124046	0.463958	-0.0469058	0.0792831	0.112104	0.7783	0.0180405	0.455358	-0.0478121	0.637029	0.0302316	0.162419	0.0893451	0.779295	-0.0179574	0.760792	-0.019508	0.0317913	-0.136941	0.169288	0.0879127	0.0437267	-0.1287	0.0676279	-0.116712	0.163794	0.0890548	0.467026	-0.0465848	NA	NA	0.872554	0.0102798	0.82176	-0.0144362	0.891023	0.00877995	0.102661	-0.104305
CHOL	DGUOK	0.462569	0.128319	0.486565	-0.121587	0.92897	-0.0156344	0.377306	0.153931	0.560304	0.101885	0.985346	-0.00322151	0.266265	-0.193151	0.720286	0.0627451	0.588003	0.0948059	0.177316	-0.233346	0.317903	0.173848	0.889069	0.0244617	0.682846	0.0715736	0.207325	-0.218489	0.461783	-0.128543	0.64995	-0.0794765	0.978341	0.0047619	0.169077	0.237732	0.762621	0.0529412	0.643457	-0.0810541	0.56287	-0.101223	0.244508	0.202017
COAD	DGUOK	0.993622	0.000384399	0.0074917	0.128056	0.865327	0.0081549	0.222052	-0.0586652	0.0840244	-0.0829375	0.737114	0.0161399	0.828261	0.0104309	0.0107208	-0.122236	NA	NA	0.535231	-0.0298079	0.0879905	0.0818992	0.00232455	-0.14565	0.918512	-0.00491946	0.461068	0.0354316	0.10828	-0.0771077	0.33722	0.046121	0.860355	-0.008459	0.26848	0.0531714	0.763869	-0.0144441	0.667997	0.0206212	0.0965684	0.079776	0.482467	-0.0337622
ESCA	DGUOK	0.301612	0.116935	0.289436	0.119899	0.237015	0.133715	0.617624	-0.0566614	0.273007	-0.124033	0.0693872	0.204092	0.0129432	-0.276773	0.915996	0.011981	0.107164	0.181481	0.0746136	-0.200453	0.906612	-0.0133251	0.629202	-0.0548062	0.195998	0.146088	0.234147	-0.134529	0.538373	0.0698045	0.390382	0.0973343	0.266814	-0.125634	0.98289	0.00243609	0.644192	-0.0524255	0.893901	-0.0151488	0.0734843	0.201222	0.6265	-0.055238
HNSC	DGUOK	0.483949	-0.0316942	0.72164	-0.0161347	0.17668	-0.0611332	0.00348717	-0.131726	0.491552	0.0311456	0.259198	0.051068	0.200873	-0.0578818	0.0576145	0.0858318	0.0197092	0.105318	0.00187999	-0.140095	0.580571	0.0250217	0.000956636	-0.148762	0.12702	0.0690298	0.305558	-0.0463796	0.598729	-0.0238301	0.221534	-0.0553241	0.411396	-0.037191	0.142882	0.0662848	0.0465433	-0.089966	0.414735	-0.0369263	0.903891	0.00546872	0.523715	0.0288729
KIRC	DGUOK	0.118916	0.069272	0.00233813	-0.134751	0.194053	-0.0577139	0.905724	0.0052676	0.0401256	-0.0910979	0.0970041	0.0737122	0.681468	-0.0182547	0.000155478	-0.167037	0.697522	0.0172856	0.0315543	-0.0954087	0.0519979	-0.0862651	0.744065	0.01452	0.00586378	0.12209	0.126362	-0.0679099	0.00016583	0.166337	0.18033	0.0595352	0.000546616	-0.152845	NA	NA	0.00015821	0.166848	0.000377026	0.157163	0.12431	0.0682789	0.000613645	0.151478
LIHC	DGUOK	0.275437	0.0572356	0.000207583	-0.193003	0.374869	0.0465827	0.476633	0.0373688	0.0076211	0.139466	0.000745846	0.175734	1.83908e-05	-0.222167	0.234354	-0.0623999	0.281652	-0.0565014	0.0542872	-0.100824	0.461939	-0.0386242	0.36846	0.0472104	0.540035	-0.0321754	0.42625	-0.04177	0.247963	0.0606241	0.0198858	0.121843	0.0892751	-0.0890706	0.221313	0.0641711	0.175745	0.0710242	0.0463679	0.104341	0.436452	-0.0408559	0.000200584	0.193446
LUAD	DGUOK	0.0467776	-0.088612	0.267001	0.0495358	0.364454	-0.0404809	0.904326	-0.00536737	0.0633196	0.0827782	0.627299	-0.0216786	0.00432247	0.126911	0.736664	0.0150153	0.494279	0.030515	0.0126615	-0.110986	0.97044	-0.00165471	0.806586	0.0109325	0.00134599	0.142431	0.622891	-0.0219565	0.572798	0.0251782	0.214621	0.0553717	0.000683919	-0.150776	NA	NA	0.124814	0.0684587	0.00771208	0.118558	0.551591	0.0265816	0.0234352	0.10094
LUSC	DGUOK	0.000302822	-0.165935	0.015437	0.111664	0.533558	0.0287883	0.00791944	0.122354	0.0270635	0.101973	0.0138749	-0.113429	0.175502	0.0625946	0.0590792	0.087135	0.681549	0.0189769	0.210053	-0.0579217	0.792095	0.0121906	0.0374664	-0.0960068	0.161693	0.0646542	0.217767	-0.0569559	0.156814	-0.0654133	0.414979	0.0376876	0.0106927	-0.117646	0.542097	0.0281903	0.00737619	0.123446	0.234939	0.0548908	0.147693	0.0668821	0.00320486	-0.135684
PAAD	DGUOK	0.437364	-0.0589112	0.952259	0.00454528	0.252941	0.0866298	0.893995	0.010116	0.0354161	0.158687	0.427414	-0.0601964	0.686473	0.0306371	0.841561	0.0151751	0.385522	0.0658084	0.719257	0.0272841	0.42156	-0.0609605	0.324493	-0.0746958	0.0228663	0.171484	0.0292743	-0.164359	0.389566	0.0652512	0.0327023	-0.161081	0.611408	-0.0385573	0.54811	0.0455728	0.854409	0.0139301	0.0564665	0.144053	0.669471	0.0323993	0.240278	0.0889739
PRAD	DGUOK	0.589854	-0.0247424	6.36606e-05	-0.182039	0.750376	-0.0146044	9.16292e-05	-0.17814	0.598618	-0.0241615	0.234417	0.0545458	0.614224	-0.0231367	0.595845	-0.024345	1.64089e-05	-0.195889	0.102343	0.0748889	0.0858881	-0.0787233	0.00229392	-0.139301	7.34133e-05	0.180522	0.16238	-0.0640716	0.000758912	0.153667	0.00161053	-0.144036	1.85546e-06	-0.216315	NA	NA	0.795392	0.0119041	0.438437	-0.0355594	0.909617	-0.00521141	0.0079051	0.121482
READ	DGUOK	0.0347086	0.168674	0.427699	-0.063744	0.0614414	0.149621	0.873937	-0.012764	0.291055	-0.0847886	0.126267	0.122545	0.589422	0.0433971	0.572613	-0.045368	0.329264	-0.0783676	0.878767	0.0122711	0.377371	-0.0709292	0.00758808	-0.21234	0.848169	0.015402	0.0559413	-0.152877	0.516493	0.0521582	0.877687	0.0123812	0.994956	-0.000508565	NA	NA	0.0483518	-0.157836	0.662139	-0.0351434	0.121899	0.123966	0.000972053	-0.260763
STAD	DGUOK	0.0113775	-0.131448	0.708247	-0.0195186	0.445243	-0.0398046	0.535847	-0.0322866	0.781522	-0.0144662	0.00252117	0.156603	0.177282	0.0702911	0.444443	-0.0398746	0.0350555	0.109615	0.000910489	-0.171731	0.000483412	-0.180543	0.907409	0.00606699	0.974729	0.00165242	0.712014	0.0192547	0.497591	0.035371	0.485468	0.0363742	0.960282	-0.00259777	0.515979	0.0338737	0.391886	-0.0446407	0.219909	0.0639278	0.377782	-0.0459838	0.873885	-0.00827963
THCA	DGUOK	0.0023075	0.136677	0.0106175	-0.114751	0.0785986	-0.0791317	0.753185	0.0141683	0.471953	-0.0324038	0.426777	0.035799	0.329553	-0.0439135	0.330901	0.0437914	0.744475	0.0146859	0.304679	0.0462278	0.682522	-0.0184293	0.213499	-0.0560114	0.367393	0.0405994	0.747533	0.014504	0.426322	0.0358342	0.0231934	-0.102031	0.00560604	-0.124332	NA	NA	0.132696	0.0676733	0.329578	-0.0439112	0.246222	-0.0522154	0.160757	0.0631358
UCEC	DGUOK	0.63068	0.0210102	0.154189	-0.062216	0.00555697	0.120746	0.00416404	-0.124748	0.231717	0.0522344	0.0267229	-0.096606	0.124669	0.0670338	0.000540367	0.150358	0.146135	-0.0634548	0.00395392	0.125455	0.339954	-0.0416886	0.178113	-0.0588031	0.0225851	0.0994194	0.0275386	-0.0960963	0.711353	0.0161719	0.686488	0.0176395	0.73344	-0.0148834	NA	NA	0.18551	-0.0578174	2.04419e-05	0.184586	0.000260003	0.158612	5.92935e-11	-0.280323
BLCA	ENTPD2	0.736019	-0.0169723	0.432607	0.039494	0.0825368	0.0872439	0.147005	-0.0729161	0.288017	0.0534549	0.0115017	0.126718	0.332628	-0.0487492	0.242382	-0.0588077	0.88028	0.00758293	0.895677	0.00660169	0.824702	-0.0111517	0.0113537	0.126944	0.167017	0.0694885	0.321254	-0.0499076	0.193993	-0.0653242	0.044256	-0.101022	0.622191	-0.0248047	0.0984778	0.083044	0.0777002	-0.0886472	0.989076	-0.00068935	0.296552	-0.0525191	0.163938	-0.0699949
BRCA	ENTPD2	0.0385555	-0.0693636	0.871927	0.0054114	0.152021	0.048055	0.234414	-0.0398978	0.44325	-0.0257323	0.0737712	0.0599652	0.883985	-0.00489808	0.473423	0.0240616	0.802065	-0.00841432	0.351312	-0.0312786	0.519167	-0.0216359	0.0326024	-0.0716392	0.989203	0.000454257	0.0407016	0.0686163	0.000886311	0.111242	0.0314304	-0.0721286	0.0336013	-0.0712339	0.25865	-0.0379035	0.830795	0.00717261	0.00699459	0.0903491	0.0848851	-0.0577887	0.124412	0.0515423
CESC	ENTPD2	0.832922	0.0135183	0.402864	0.0535689	0.127055	-0.0975474	0.389698	-0.055081	0.106183	0.103257	0.0309475	0.137619	0.0968939	-0.106086	0.00924254	-0.165654	0.138469	0.094728	0.359025	-0.0587288	0.222757	-0.0780141	0.813475	0.0151195	0.683582	-0.0261149	0.714896	0.023406	0.304861	-0.0656834	0.30334	-0.0658899	0.909217	-0.0073072	NA	NA	0.87131	0.010381	0.00709034	0.171274	0.0591683	-0.120482	0.142161	-0.0938543
CHOL	ENTPD2	0.794357	-0.0456956	0.614469	-0.0881777	0.862959	0.0302688	0.373268	-0.155222	0.922865	0.0169821	0.419416	0.140916	0.233069	-0.206892	0.25649	0.197073	0.681897	0.0717998	0.415495	0.142095	0.170378	0.23703	0.659254	-0.0772263	0.000957712	0.533828	0.298117	-0.180989	0.137358	-0.256221	0.0719528	-0.307902	0.436923	0.135724	0.0925798	-0.288695	0.278824	-0.188248	0.850958	0.0329482	0.142584	-0.252975	0.39093	0.149632
COAD	ENTPD2	0.491792	-0.0330473	0.0516451	0.0933721	0.457576	0.035708	0.00965809	-0.123955	0.00019959	-0.177432	0.804754	0.0118861	0.0187515	-0.11266	7.50671e-07	-0.234584	NA	NA	0.447301	0.0365284	0.00226992	0.145988	8.54472e-07	-0.233419	0.515583	0.0312555	0.456611	-0.0357846	0.246686	-0.0556598	0.0121912	-0.120091	0.179252	0.0645134	0.0950102	0.0801502	0.130391	0.072635	0.28814	-0.0510428	0.260789	-0.054033	1.12068e-05	0.208877
ESCA	ENTPD2	0.865372	0.0192564	0.140826	-0.166124	0.180355	0.151296	0.71143	0.042003	0.731116	0.0390197	0.0570709	0.213635	0.719887	-0.040718	0.0415207	-0.22846	0.308586	0.115272	0.345025	-0.106954	0.122332	-0.174161	0.609553	0.0579635	0.893261	0.0152406	0.568535	0.0647029	0.612604	-0.0574705	0.822448	-0.0254854	0.927894	0.0102791	0.562132	0.0657749	0.446591	-0.0862939	0.891839	0.015445	0.75975	-0.0347268	0.158086	-0.159312
HNSC	ENTPD2	0.34467	-0.0427794	0.15342	-0.0645879	0.167026	0.062523	0.548463	-0.0271726	0.869526	0.00743945	0.115673	0.0711615	0.0831493	-0.0783551	0.292121	-0.0476861	0.0644936	0.0835854	0.125605	-0.0692873	0.318238	-0.0451812	0.412983	-0.037065	0.558601	0.0264871	0.478035	-0.0321242	0.891081	-0.00620194	0.564692	0.0260781	0.183409	-0.0601975	0.480487	-0.0319456	0.279151	-0.0489859	0.679543	-0.0187075	0.370168	-0.0405713	0.95848	0.00235789
KIRC	ENTPD2	0.056312	-0.0847374	0.18811	-0.0584907	0.383643	0.0387343	0.00214089	0.13591	0.173861	-0.0604296	1.26213e-06	-0.213042	0.212034	0.0554647	0.0127987	-0.11038	0.226157	-0.0537928	0.00413264	0.127038	0.724121	0.0156976	0.011727	-0.111743	4.44655e-06	0.202014	0.0939268	0.074398	0.00286469	-0.132046	1.42956e-08	-0.248221	0.808228	-0.0107949	NA	NA	0.00186687	0.137693	0.100934	0.0728611	0.85026	-0.0083966	0.462481	-0.0326718
LIHC	ENTPD2	0.539315	0.0322325	0.895058	-0.00692799	0.595319	-0.0278916	0.0248244	0.117459	0.614316	0.0264627	8.87181e-08	0.27546	0.871625	0.00848719	2.32744e-05	-0.219502	0.62277	-0.025833	0.283943	-0.0562336	0.000895778	-0.173128	0.61961	0.026068	0.339504	-0.0501351	0.234088	-0.0624353	0.373795	-0.0466874	0.0102375	-0.134251	0.236303	0.0621412	0.393745	0.0447711	0.0527668	-0.101464	0.531085	-0.0328887	0.00736704	-0.140055	0.00637188	0.142549
LUAD	ENTPD2	0.172567	0.0608523	0.645814	0.0205203	0.770086	0.0130502	0.131079	-0.0673453	0.438364	-0.0345949	0.0313401	0.0959071	0.472518	-0.0320709	0.121349	-0.0690931	0.751011	-0.0141684	0.804591	0.0110476	0.0879781	-0.0760772	0.666729	-0.0192283	0.339264	0.0426533	0.601352	-0.0233269	0.238564	0.0525925	0.00546442	-0.123587	0.564522	-0.0257229	NA	NA	0.25628	-0.0506604	0.9919	-0.000453323	0.0106602	-0.113662	0.000193168	0.165316
LUSC	ENTPD2	0.256465	-0.0524473	0.124657	-0.0709277	0.727624	0.0161071	0.533188	-0.0288144	0.986337	-0.000792045	1.78332e-07	0.237975	0.017651	-0.109414	0.0271148	-0.101939	0.0121688	0.115569	0.00418046	-0.13189	0.0228513	-0.104969	0.059367	-0.0870367	0.474022	0.0331034	0.131039	0.0697528	0.000413801	-0.16223	0.128311	-0.0702495	0.131069	-0.0697473	0.426548	0.0367613	0.0541836	-0.0888714	0.619315	-0.0229748	0.0362318	-0.0966348	0.251726	0.0529726
PAAD	ENTPD2	0.794688	-0.0197542	0.00135418	-0.239706	0.677774	-0.0315366	0.674321	0.0318949	0.322597	0.0749882	0.779531	0.0212496	0.65419	0.0339979	0.743996	0.0247888	0.0744975	0.134786	0.767203	0.0224718	0.74111	0.0250784	0.837706	0.0155494	0.00637446	0.204895	0.762177	-0.0229718	0.538689	-0.0466492	3.61271e-06	-0.341089	0.0967222	0.125598	0.0179224	-0.178274	0.0547844	-0.145036	0.774695	-0.0217284	0.359603	-0.0694669	0.917671	-0.00784742
PRAD	ENTPD2	0.312756	-0.0463165	0.0697326	-0.0831154	0.936673	0.00364744	0.644009	-0.0212114	0.526097	0.0290979	0.847751	0.00881349	0.40061	0.0385722	0.0190109	-0.107356	0.0050692	-0.128129	0.133825	0.0687422	0.302733	-0.0472852	0.0104003	-0.117219	0.000401527	0.161403	0.514415	-0.0299238	0.152504	0.0656108	0.000745966	-0.153881	0.811908	0.010924	NA	NA	0.461546	0.033792	0.50705	-0.0304496	0.104029	-0.0745243	0.543181	-0.0279066
READ	ENTPD2	0.0900476	0.135745	0.548904	0.0481949	0.217026	0.099071	0.302878	0.0827456	0.0546693	-0.153668	0.0975392	0.13271	0.706863	0.0302487	0.0447584	-0.160413	0.693454	0.0317038	0.359583	0.0736065	0.439605	-0.0621178	0.0110909	-0.202217	0.549243	-0.048154	0.388728	-0.06926	0.888304	0.0112991	0.260032	-0.0904281	0.682799	0.0328674	NA	NA	0.287928	-0.085338	0.648327	-0.0366806	0.0442002	0.160828	0.432269	0.0631168
STAD	ENTPD2	0.010222	-0.13337	0.158871	0.0733937	0.109073	-0.0834404	0.00443962	-0.147599	0.0700487	-0.0942895	9.12801e-06	0.228379	0.0743753	-0.0928749	0.498752	-0.0352756	0.0281118	0.114163	0.152351	-0.0745573	0.00365087	-0.150765	0.688947	-0.0208782	0.722264	0.0185393	0.152852	0.0744665	0.275335	-0.0568575	0.057096	-0.099002	0.000153223	0.195572	0.205005	0.0660415	2.3397e-05	-0.217981	0.00965217	-0.13439	0.0316283	-0.111753	0.349752	0.048748
THCA	ENTPD2	0.106308	-0.0726771	0.185595	0.0595947	0.016355	0.10787	2.33355e-19	0.38928	3.41288e-11	-0.292104	4.94482e-06	0.203637	0.495165	-0.0307293	0.53966	0.0276316	0.151157	-0.0646149	8.72402e-05	0.175426	6.66952e-08	-0.239763	0.171401	0.0615716	0.000144234	-0.170017	0.634708	-0.0214063	0.00564547	-0.12423	0.353723	-0.0417706	0.47832	0.0319401	NA	NA	3.23028e-06	-0.207497	0.0746977	-0.0801829	0.555003	0.0265937	8.59351e-05	0.175586
UCEC	ENTPD2	0.617119	-0.0218477	0.810373	-0.0104867	0.855177	0.00797695	0.148325	0.063113	0.921296	0.0043182	0.630009	0.0210515	0.0128097	-0.108464	0.104017	-0.0709626	0.574258	0.02455	0.870879	0.007104	0.201303	0.0558061	0.822097	0.00982703	0.105577	0.0706454	0.431244	-0.0343893	0.631335	-0.02097	0.000242763	-0.159365	0.0139438	0.107151	NA	NA	0.380132	-0.0383446	0.988267	0.000642717	0.284605	-0.0467413	0.240295	0.051288
BLCA	GART	0.474442	-0.0360002	0.0176684	-0.119024	0.99211	0.000497847	0.227029	0.0607658	0.631088	0.024173	0.0586028	0.0949995	0.0238202	0.113418	0.0565385	-0.0957845	0.0180092	0.118672	0.0254481	-0.112148	0.183323	-0.0669167	0.0135809	0.123787	0.0761765	-0.089104	0.00025799	0.182433	0.0501219	-0.0983871	0.000422226	0.176124	0.91747	0.00521699	0.0798084	-0.0880271	0.420944	0.0405021	0.0221088	0.114838	0.537897	0.0310063	3.47074e-07	-0.2524
BRCA	GART	0.0102393	-0.0860289	0.0292923	0.073063	0.0265086	0.0743718	0.552168	-0.0199542	0.582778	0.018438	0.0512588	0.0653629	8.27996e-08	0.178504	0.785367	0.00914124	0.0645539	0.0619839	4.26552e-10	-0.207312	0.14483	-0.048913	0.321102	0.0332961	5.18707e-15	-0.258111	0.00111786	0.109071	0.000148466	-0.126827	3.69853e-14	0.250094	0.045927	0.0669272	0.945591	0.00229076	0.000224034	-0.123398	3.83349e-05	0.137549	0.489575	0.0231913	0.000101407	-0.129929
CESC	GART	0.796734	-0.0165054	0.0757691	0.113432	0.846222	-0.0124281	0.390586	0.0549781	0.0691085	0.116092	0.259332	0.0721907	0.289623	0.0677837	0.48928	0.0442895	0.0549382	0.122537	0.901772	0.00790936	0.763394	-0.0192892	0.535053	0.0397364	0.406289	-0.0531805	0.434422	0.0500597	0.193613	-0.0831626	0.372164	0.0571436	0.178294	0.0860985	NA	NA	0.110925	-0.101887	0.543759	-0.0388932	0.947708	-0.00420296	0.000269638	-0.230303
CHOL	GART	0.294332	-0.182389	0.507062	0.115971	0.889104	-0.0244538	0.220897	-0.212259	0.496441	0.118866	0.00521339	0.461937	0.795124	-0.0455214	0.512256	0.114566	0.219069	0.213083	0.288718	-0.184486	0.998706	-0.00028453	0.338378	0.166745	0.719668	-0.0628896	0.576064	-0.0978385	0.248036	-0.200545	0.378134	-0.153667	0.903387	-0.0212885	0.240351	-0.203771	0.0128772	-0.416246	0.391819	0.149355	0.960808	0.00861898	0.670466	0.0745307
COAD	GART	0.64245	0.0223218	0.237421	0.0567642	0.0321074	0.102776	0.0262959	-0.106531	0.301859	-0.0496147	0.325816	0.0472205	0.677385	0.0200029	0.116891	-0.0752878	NA	NA	0.353293	-0.0446109	0.294044	0.0504228	0.080916	-0.0837792	0.0116076	-0.120913	0.0564183	0.0915428	0.00852151	-0.125991	0.0449136	0.0962083	0.360175	0.0439777	0.22636	0.0581231	0.222644	-0.0585903	0.360592	0.0439396	0.0344587	0.101421	0.1172	-0.0752244
ESCA	GART	0.53229	0.0708501	0.943136	0.00810215	0.0652073	0.207165	0.706344	0.0427782	0.993931	-0.000863964	0.319947	0.112614	0.469304	-0.0820572	0.631485	-0.0544422	0.310098	0.114914	0.240057	-0.132859	0.894908	0.0150041	0.986798	-0.00187961	0.709959	-0.042227	0.962922	0.00528052	0.823863	0.025279	0.576591	0.0633623	0.0571411	0.213576	0.291589	-0.119369	0.0209216	-0.257874	0.284898	-0.121025	0.955444	0.0063464	0.123377	-0.173683
HNSC	GART	6.85451e-05	-0.17886	0.738742	0.0151046	0.585006	0.0247291	0.0764574	-0.0801096	0.386162	0.039234	0.448821	-0.0342926	0.0639829	0.0837452	0.283451	-0.0485505	0.303168	0.0466092	0.102759	-0.0737971	0.212161	0.0564621	0.184726	0.0600173	0.0426079	-0.0916359	0.00204368	0.138991	0.336388	-0.0435189	0.0104425	0.115593	0.00101287	0.148047	0.947977	0.00295511	0.0361766	-0.0946688	0.323088	-0.0447311	0.755888	0.0140796	0.000755084	-0.151691
KIRC	GART	0.259892	-0.0500788	0.753895	-0.0139434	0.260812	-0.0499824	4.13923e-05	0.180833	0.662041	-0.0194391	0.0744478	-0.0792163	0.000127589	0.169166	3.1912e-05	0.183426	0.614152	0.0224207	0.774316	-0.0127527	0.00485758	0.124773	1.00853e-08	0.250742	2.648e-06	-0.206625	0.046408	-0.0884105	0.424579	-0.0355041	0.176066	0.0601221	0.421512	0.0357395	NA	NA	0.0506137	-0.0867777	0.1391	-0.0657177	0.0127814	0.110401	6.56681e-09	-0.253805
LIHC	GART	0.133778	0.0786287	0.399621	0.044218	0.99618	0.000251489	0.301998	0.0541718	0.00603249	0.14348	0.000311408	0.187691	0.281923	-0.0564696	0.439054	0.0406247	0.630848	-0.0252349	0.331893	0.05093	0.640555	-0.0245203	0.0803054	0.0916641	0.201859	-0.0669579	0.406065	0.043617	0.274244	-0.0573778	0.881206	0.00784888	0.505698	-0.0349458	0.144096	0.0766073	4.25998e-05	-0.21251	0.365075	0.0475447	0.0260529	-0.116487	0.155607	-0.0744785
LUAD	GART	3.45787e-05	-0.183344	0.905058	-0.00532611	0.250009	0.0513334	0.195222	0.0577918	1.25004e-05	0.193239	0.500899	-0.030049	0.0155101	0.10776	0.00684329	0.120323	0.652546	0.0201026	0.651891	-0.0201432	0.0508505	0.0870329	0.1565	0.0632095	0.139472	0.0659167	0.37539	0.0395672	0.00922649	-0.115868	0.0156307	0.107635	0.659247	0.0196886	NA	NA	0.536818	-0.0275747	0.591655	0.023951	0.986566	-0.000751869	0.00577972	-0.122781
LUSC	GART	0.00193123	-0.142668	0.64779	-0.0211261	0.392841	-0.0395038	0.138347	0.0684604	0.000920123	0.15237	0.494562	-0.0315839	0.00103895	0.15082	0.00300809	0.136575	0.438476	-0.0358214	0.525127	-0.0293836	0.490213	0.0319028	0.517371	0.0299355	0.00888052	-0.120576	0.0005922	0.157878	0.0026639	-0.13827	0.00144944	0.146492	0.481193	0.032569	0.326204	0.045384	0.886473	0.00660294	0.262707	-0.0517656	0.596582	-0.0244773	0.0310471	-0.0994885
PAAD	GART	0.603429	-0.0394226	0.274227	0.0828652	0.632609	0.0362816	0.268852	0.0837964	0.542882	0.046169	0.98924	-0.00102381	0.027462	0.166226	0.385437	0.0658202	0.555772	-0.044704	0.104996	0.122607	0.146116	-0.110004	0.0711034	0.136379	0.0036983	-0.217728	0.421888	-0.0609175	0.363543	0.0689004	0.232938	0.0903725	0.102303	0.12356	0.594864	-0.0403572	0.373198	-0.0675283	0.228095	-0.0913122	0.964447	-0.003384	0.198441	-0.0973997
PRAD	GART	0.0758299	-0.0813692	4.9476e-05	0.184691	0.188734	0.0602826	0.000440161	0.160308	0.308193	0.0467549	0.260225	0.0516507	1.63034e-06	0.217466	0.497358	0.0311476	0.636035	0.021723	0.84963	-0.00870343	0.0798302	0.0802847	0.00210145	0.140487	0.000165859	-0.171605	0.631972	0.0219848	0.00914028	-0.119242	0.057563	0.0870131	0.00995316	0.117911	NA	NA	3.91076e-06	-0.209554	0.920447	-0.00458476	0.550084	-0.0274306	0.0158098	-0.110448
READ	GART	0.36654	0.0725499	0.0621383	0.149226	0.0410587	0.163253	0.875945	-0.012559	0.410588	-0.0661278	0.486399	0.0559543	0.509175	0.0530705	0.144262	-0.117063	0.918788	-0.0082028	0.256503	0.0910982	0.0193434	-0.18651	0.655268	-0.0359065	0.0228202	-0.181617	0.267546	-0.089022	0.295735	0.0839734	0.0331055	0.170174	0.795047	0.020896	NA	NA	0.0224373	-0.182123	0.270277	0.0885176	0.371166	0.0718541	0.00100897	-0.259963
STAD	GART	0.0428145	-0.105365	0.280351	0.0562681	0.830719	-0.0111512	0.285485	-0.0556721	0.55714	0.030618	4.30587e-05	0.210967	0.33067	0.0507107	0.597319	-0.027551	0.00823638	0.137177	0.0106165	-0.132693	3.57792e-06	-0.238264	0.164284	0.0724546	0.000465158	-0.181066	2.45959e-05	0.217415	0.0330405	-0.110849	0.001476	0.164714	0.520639	0.0334987	0.790008	-0.0138906	0.0268941	-0.115058	0.000251702	0.18922	0.732647	-0.0178182	0.000267323	-0.188435
THCA	GART	0.186196	-0.0595136	4.23138e-05	0.18294	0.00350131	0.131005	0.248196	0.0519982	0.98723	0.000721198	0.192602	0.0586598	0.999897	5.84372e-06	0.125864	0.0688886	0.863689	0.00773587	0.376316	0.0398495	0.0872559	-0.0769417	0.42112	0.0362384	0.00824251	-0.118628	0.831359	0.00959581	0.388399	-0.0388512	0.132572	-0.0676949	0.758922	0.0138283	NA	NA	0.0118381	-0.113051	0.195082	-0.0583348	0.720093	0.0161457	0.262726	-0.0504344
UCEC	GART	0.680617	-0.0179889	0.316568	0.0437522	1.9237e-06	0.205864	0.0370861	-0.0909302	0.0135934	0.107546	0.774432	-0.0125249	0.00184537	0.135475	8.18707e-09	0.248	0.828031	-0.00949397	0.788051	0.0117496	0.0138651	-0.107239	0.925013	-0.00411363	0.483522	-0.0306154	0.389909	-0.0375644	0.136729	-0.0649694	0.0107074	0.111196	0.634006	0.020806	NA	NA	2.91574e-05	-0.181175	5.26524e-07	0.216637	8.25301e-05	0.170802	3.03547e-29	-0.462545
BLCA	GMPS	0.875889	-0.00786328	0.0291713	-0.109485	0.866485	0.00846452	0.680914	-0.0207014	0.56677	0.0288337	0.00861206	0.13169	0.000289313	0.180984	0.100174	-0.0826298	0.165754	0.0696954	0.0477318	-0.0994279	0.132864	-0.075559	0.0206307	0.116143	0.49697	-0.0341891	0.0317802	0.107789	0.00602484	-0.137617	6.29811e-06	0.224467	0.963746	0.00228845	0.024214	-0.113104	0.103206	0.0819034	0.000554136	0.17255	0.609086	0.0257423	1.45939e-09	-0.297612
BRCA	GMPS	0.000304416	-0.120784	0.319081	0.0334353	0.000345436	0.119692	0.263389	-0.0375289	0.766152	0.00998303	0.0233205	0.0760251	5.11682e-06	0.152172	0.0728233	0.060163	0.0247211	0.0752761	2.86568e-09	-0.197395	0.111664	-0.0533593	0.0967814	0.0557006	6.04896e-10	-0.205531	0.0042324	0.0957916	0.000730497	-0.113022	3.22439e-09	0.196764	0.208398	0.0422082	0.474628	0.0239961	1.14688e-08	-0.189838	0.000126133	0.128162	0.11393	0.0530249	6.47576e-07	-0.165887
CESC	GMPS	0.790164	0.0170514	0.00222391	0.194138	0.623799	-0.0314238	0.00228391	0.193641	0.130724	0.0966205	0.368995	-0.0575228	0.616541	0.0320824	0.977898	-0.00177543	0.821797	-0.0144332	0.055007	0.122502	0.0572025	0.121421	0.0829703	-0.110761	0.196388	-0.0826491	0.30724	-0.0653618	0.331338	-0.0621924	0.688493	0.0256871	0.0317782	0.136952	NA	NA	0.133128	-0.0960241	0.828846	0.0138531	0.788266	-0.0172093	0.0109493	-0.161972
CHOL	GMPS	0.794371	-0.0456924	0.27948	0.187996	0.964451	-0.00781721	0.926325	0.0162182	0.771339	0.0509427	0.212413	0.216122	0.61252	0.0886617	0.839228	-0.0355742	0.0794017	0.300525	0.469485	-0.126361	0.871109	-0.028453	0.0106679	0.426271	0.545979	-0.10561	0.221701	-0.211899	0.676728	-0.0730325	0.88266	-0.0258845	0.675234	-0.0733894	0.202542	-0.220752	0.0524602	-0.330532	0.0789292	0.300977	0.249252	0.20004	0.840434	0.035304
COAD	GMPS	0.533943	0.0299019	0.00686453	0.129442	0.010875	0.121999	8.93061e-05	-0.186734	0.0193012	-0.112147	0.160807	0.0673556	0.390053	0.0413121	0.0029613	-0.142168	NA	NA	0.344266	-0.0454536	0.820009	0.0109405	0.0178903	-0.113491	0.0677878	-0.0876535	0.0259505	0.106776	0.000966752	-0.157687	0.151582	0.0688699	0.347756	0.0451262	0.146618	0.0697139	0.369317	-0.0431481	0.215833	0.059461	0.0661503	0.0881788	0.0458371	-0.0957989
ESCA	GMPS	0.570013	-0.0644564	0.0470412	0.222741	0.0353502	0.235655	0.0772931	0.198666	0.21108	0.141343	0.811553	-0.0270777	0.125695	-0.172633	0.542038	0.0691773	0.819672	0.0258907	0.459035	-0.0839584	0.237108	0.133689	0.786846	0.0307088	0.540076	0.0695128	0.458523	-0.0840538	0.095585	0.187631	0.0422338	0.227687	0.347972	0.106306	0.203398	-0.143729	0.0406503	-0.229419	0.93974	-0.00858701	0.46933	0.0820523	0.308787	-0.115224
HNSC	GMPS	0.000203968	-0.16703	0.182241	0.0603581	0.364663	0.0410397	0.0212574	-0.104039	0.881479	0.00675256	0.414284	0.036962	0.346216	-0.0426427	0.0375247	-0.0939972	0.910003	0.00511942	0.429563	-0.0357658	0.683428	0.0184677	0.0545255	-0.0869135	0.00112404	-0.146736	0.0273549	0.0996819	0.318278	0.0451775	0.148528	0.0653642	0.0232723	0.102492	0.222489	0.05521	0.00237523	-0.136981	0.17171	-0.0618414	0.868178	-0.007517	0.0814028	-0.0788016
KIRC	GMPS	0.0231844	-0.100724	0.00189358	0.137509	0.798813	-0.0113362	0.0021456	0.135881	0.439305	0.0343872	0.683833	0.0181114	0.127638	0.0676827	8.34884e-05	0.17365	0.673039	0.0187669	0.0474679	0.0879877	0.154538	0.0632583	2.09257e-06	0.208685	0.0114311	-0.112139	0.0447691	-0.0890805	0.955015	0.00250898	0.365735	0.0402131	0.0717426	0.0799643	NA	NA	0.000222409	-0.163114	0.000399201	-0.156506	0.201523	0.0567618	1.15371e-08	-0.249773
LIHC	GMPS	0.306611	0.0536582	0.191291	0.068554	0.748974	0.0168056	0.00912096	0.136312	0.0159102	0.126124	2.81041e-05	0.217345	0.842241	-0.0104531	0.173785	-0.0713471	0.859967	0.00926565	0.98823	-0.000774823	0.116666	-0.0822641	0.112891	0.0831215	0.858116	-0.00938939	0.252209	-0.060084	0.292176	-0.0552829	0.163267	0.0731272	0.226434	-0.063467	0.0930235	0.0880486	0.00233947	-0.15883	0.0683111	0.0955269	0.0598701	-0.0985933	0.912755	-0.00575455
LUAD	GMPS	6.56472e-06	-0.199251	0.770976	0.0129983	0.767806	-0.0131835	0.13479	-0.0667052	0.016875	0.106395	0.00964698	0.115191	1.34597e-06	0.213319	0.712434	-0.016458	0.210907	0.0558225	0.0124058	-0.111306	0.411689	-0.0366456	0.541374	0.027267	0.615451	0.0224275	0.320926	0.0443003	0.0585396	-0.0843194	2.23576e-06	0.208918	0.166739	-0.0616874	NA	NA	0.720333	0.0159859	0.398434	0.0376937	0.845905	-0.00867825	0.018217	-0.105145
LUSC	GMPS	0.000233505	-0.16896	0.0225492	0.105202	0.368652	-0.0415606	0.00926786	0.119908	0.044839	0.092585	0.476084	-0.0329493	0.00962952	0.119306	0.0758648	0.0819643	0.904852	0.0055284	0.260021	-0.0520576	0.655341	-0.0206416	0.0599309	-0.0868452	0.15609	-0.0655276	0.320398	0.0459314	0.65186	-0.0208647	0.0289515	0.100759	0.361113	-0.0422185	0.329568	-0.0450698	0.666197	0.0199489	0.61054	-0.0235518	0.916936	0.00482356	7.31794e-05	-0.181881
PAAD	GMPS	0.134089	-0.113372	0.372632	0.0676082	0.314264	0.0762869	0.72349	0.0268551	0.0213835	0.173375	0.626353	-0.0369497	0.0530017	0.146107	0.141182	0.111359	0.401823	-0.0635836	0.0969101	0.125528	0.301594	-0.0783053	0.0136364	0.185638	0.0833121	-0.130909	0.668173	-0.0325345	0.345615	0.0715095	0.151991	0.108435	0.11896	0.117955	0.417994	-0.061429	0.353351	-0.0703735	0.849804	-0.0143759	0.823765	-0.0169063	0.0126932	-0.187528
PRAD	GMPS	0.102107	-0.0749403	1.74781e-05	0.195266	0.329484	0.0447442	0.00025764	0.166596	0.505005	0.0305962	0.80698	0.0112159	2.19132e-06	0.214825	0.121191	0.0710569	0.961282	0.00222858	0.780359	0.0128008	0.787446	0.0123775	0.0160617	0.110186	0.00112498	-0.148699	0.932185	0.00390651	0.000121819	-0.175032	0.153741	0.0654139	0.000185224	0.170362	NA	NA	9.07732e-08	-0.241695	0.839368	0.00930532	0.874658	0.00724151	0.00217771	-0.140006
READ	GMPS	0.94837	0.00520947	0.0112755	0.201766	0.0289488	0.174373	0.819476	-0.0183591	0.0619386	-0.149338	0.0560048	0.152838	0.34303	0.0761729	0.0343322	-0.169021	0.709359	-0.0299789	0.282531	0.086296	0.000723342	-0.267017	0.220667	-0.0982948	0.149194	-0.115652	0.0598299	-0.150549	0.396625	0.0681166	0.299274	0.0833627	0.733196	0.0274189	NA	NA	0.00797218	-0.211048	0.104122	0.130192	0.474538	0.0574846	0.0486479	-0.15763
STAD	GMPS	0.000441687	-0.181767	0.284051	0.0558378	0.8295	0.0112328	0.0839638	-0.0899637	0.129756	0.0789086	0.00826886	0.137108	0.00875748	0.136105	0.850922	0.0098036	0.114946	0.0820897	0.00432531	-0.148024	1.17333e-07	-0.27115	0.0467511	0.103452	0.00145048	-0.164972	7.23637e-05	0.204808	0.0783276	-0.0916401	2.12175e-05	0.219084	0.226595	0.0630128	0.855425	-0.00950412	0.143339	-0.0762294	4.37305e-06	0.236182	0.106071	0.0841532	2.2945e-06	-0.242807
THCA	GMPS	0.02362	-0.101719	9.01623e-07	0.218653	0.0218802	0.103024	0.0458833	-0.0897801	0.0174808	0.106777	0.446871	-0.0342649	0.0961096	-0.0748762	0.00347464	0.131111	0.421925	0.0361757	0.200427	0.0576447	0.299255	0.0467488	0.471428	0.0324422	0.412317	-0.0369291	0.0764457	0.0797064	0.0632403	-0.0835535	0.000476765	-0.156448	0.120252	0.0699257	NA	NA	0.0516175	-0.0875335	0.183819	-0.0598358	0.443803	-0.0344966	0.00228151	-0.136829
UCEC	GMPS	0.718225	-0.0157696	0.0721312	0.0784749	2.09071e-07	0.223993	0.00152076	-0.137916	0.015023	0.105986	0.922876	-0.00423123	0.000638042	0.148425	6.4529e-06	0.195256	0.472517	-0.0313903	0.704163	0.0165943	0.00230269	-0.132633	0.210208	-0.0547224	0.726654	-0.0152779	0.0530783	-0.084389	0.12581	-0.066832	0.0134711	0.107686	0.447631	0.03318	NA	NA	2.11916e-05	-0.184243	1.65155e-08	0.243014	1.66188e-05	0.186546	1.83645e-33	-0.492318
BLCA	HK2	0.610267	0.0256574	0.000188253	-0.186361	1.77446e-06	0.237098	0.161751	0.070359	0.00360925	0.145749	0.733077	0.0171689	0.365505	-0.0455369	1.30272e-05	-0.216879	3.31194e-06	0.230965	3.59855e-05	-0.205797	0.681088	-0.0206895	0.000738331	0.1687	0.401228	0.0422442	0.124664	0.0771923	0.136551	-0.0748498	0.978094	0.00138244	0.0667718	0.0921008	0.68882	-0.0201599	0.829501	0.0108416	0.00938185	0.130236	0.209394	-0.0631345	0.0125976	-0.12512
BRCA	HK2	1.66874e-07	-0.174308	0.279571	0.0362838	0.0855385	-0.0576681	0.00850611	-0.0881532	0.991698	0.000349266	0.36879	0.0301615	0.838261	0.00685163	0.000640323	0.114221	0.157947	0.0473706	0.350364	0.0313402	0.205807	-0.0424494	0.33816	0.0321427	0.00570032	-0.0925986	0.000631546	0.114346	0.0103484	0.0859062	0.272222	0.036843	0.00668607	0.090849	0.769233	0.00984765	6.97144e-08	-0.179519	1.87603e-05	-0.142902	0.747859	0.0107903	4.91685e-08	-0.181562
CESC	HK2	0.550974	-0.0381994	0.121736	0.0989286	0.0122709	0.159455	0.0640742	-0.118245	0.0628255	0.118801	0.00767233	0.169619	0.614965	-0.0322259	0.0370343	-0.133045	4.33759e-05	0.257587	0.000117258	-0.243124	0.283215	-0.0686889	0.000726473	0.21405	0.00349069	-0.185552	0.00330639	0.186604	0.184862	-0.0848179	0.149248	0.0922245	0.087012	0.109343	NA	NA	0.0901266	-0.108286	0.886526	0.00914471	0.316247	-0.0641588	8.57516e-07	-0.307722
CHOL	HK2	0.660543	-0.0769155	0.353275	0.161741	0.885492	0.0252556	0.385388	-0.15137	0.846427	0.0339618	0.351062	0.162476	0.914777	-0.0187688	0.741965	0.0577031	0.164084	0.240466	0.820098	-0.0398738	0.20126	-0.221364	0.0227621	0.384005	0.0265825	-0.374676	0.502899	0.117102	0.72163	0.062431	0.0991542	0.283272	0.0291984	-0.368908	1	0	0.341911	-0.165546	0.229501	0.208445	0.166518	0.239126	0.530997	-0.109555
COAD	HK2	0.159678	-0.0675373	0.0155826	0.115903	0.000860874	0.159216	1.43519e-06	-0.228692	0.0004664	-0.167081	0.518833	0.0310142	0.312702	-0.0485162	4.30222e-07	-0.239524	NA	NA	0.0682184	-0.0875171	0.493786	0.0328954	0.0290682	-0.104659	0.00403151	-0.137618	0.00570539	0.132333	0.703665	0.0182888	0.841343	-0.00962518	0.0113633	0.121268	0.0457483	0.095838	0.561881	-0.0278861	0.541939	0.0293198	0.488487	0.0332998	0.528932	0.0302689
ESCA	HK2	0.0992743	0.185611	0.565168	-0.0652659	0.227783	0.13636	0.59733	-0.0599499	0.328242	0.110712	0.000869731	0.365069	0.0145322	-0.272329	0.055112	-0.215304	0.000407407	0.385898	7.46277e-05	-0.428077	0.169968	-0.154939	0.230381	0.135608	0.0797713	-0.197057	0.0734293	0.201259	0.184351	0.149936	0.283341	-0.121414	0.487779	-0.0786924	0.683499	-0.0462855	0.00167638	-0.345852	0.560536	0.066043	0.474743	-0.0810592	0.00220546	-0.337451
HNSC	HK2	5.9428e-05	-0.180354	0.346695	0.0426004	0.000650725	0.153506	0.521034	-0.0290595	0.0125136	0.112746	7.3474e-06	0.200981	0.00875766	-0.118308	0.22994	-0.0543324	0.00167902	0.141579	0.0884286	-0.0770497	0.0547022	-0.0868503	5.06885e-06	0.204428	0.000923684	-0.149199	0.0442968	0.090904	0.800023	-0.0114726	0.0499989	-0.0885947	0.00483602	0.127101	0.395994	0.0384288	8.7767e-07	-0.219974	0.0124561	-0.112819	0.494958	-0.0309013	0.00010108	-0.174734
KIRC	HK2	0.713011	-0.0163584	0.25139	-0.0509815	0.0989067	-0.0732968	0.752474	0.0140265	0.058777	-0.0839077	0.131497	0.0670065	0.00685269	0.11983	0.000552691	0.152715	0.453322	0.0333438	0.0279126	-0.0975508	0.658357	-0.0196652	3.26964e-07	0.224256	0.0012233	-0.143072	0.00559301	-0.122769	0.475999	0.0316934	0.0164355	0.106403	0.98027	0.00109996	NA	NA	0.830404	-0.00952611	0.19278	-0.0578788	0.109761	0.0710414	0.00677413	-0.119998
LIHC	HK2	0.0130042	0.129895	0.00304306	-0.154705	0.550464	-0.0313517	0.60105	0.0274584	0.410982	0.0431622	1.35059e-11	0.344297	0.0122323	-0.131021	0.00540911	-0.145321	0.173191	0.0714455	0.000176383	-0.195097	0.0135854	-0.129085	0.0204021	0.121343	0.00184591	-0.162465	0.731029	-0.0180535	0.0058044	0.144133	4.45153e-05	0.211992	0.0734019	-0.0938248	0.868353	-0.00870549	0.288915	-0.0556572	0.0620825	0.0977568	0.482003	-0.0369152	0.0466464	0.104209
LUAD	HK2	0.367885	-0.0401925	0.0130738	-0.110482	0.528348	-0.0281504	0.290677	-0.0471573	0.226672	0.0539468	3.65464e-06	0.204565	0.000556085	0.153243	0.129481	0.0676254	0.0744196	0.0795383	0.778519	-0.0125586	0.950355	0.00278021	0.00367895	0.129153	0.410473	-0.0367409	0.000523177	0.153964	5.34186e-06	-0.201137	0.045311	0.089209	0.941839	-0.0032579	NA	NA	0.0348127	-0.0940356	0.0278694	-0.0979641	0.0246288	-0.100094	0.104418	-0.0724147
LUSC	HK2	0.00294717	-0.136862	0.622036	0.0227966	0.0914159	0.0779496	0.475304	-0.0330076	0.467533	0.0335909	0.00119625	0.149001	0.00546706	-0.12796	0.0534999	0.0891241	8.51319e-05	0.180246	0.0016514	-0.144765	0.698806	-0.0178941	0.816405	-0.0107375	0.83783	-0.00946574	0.129561	0.0700209	0.653029	0.0207897	3.30271e-05	-0.19025	0.0200923	0.107203	0.536748	-0.0285644	7.49732e-06	-0.204952	0.21779	-0.056953	0.000582131	-0.158089	0.121917	-0.0714466
PAAD	HK2	0.427267	0.0602154	0.000727688	-0.252359	0.169693	0.103968	0.495447	-0.051717	0.166322	0.104791	1.05715e-05	0.325292	0.411508	0.0622872	0.668055	0.0325468	0.105012	0.122602	0.935624	-0.00613197	0.0411661	-0.154088	0.342941	0.0719059	0.760457	-0.0231431	0.048563	0.148907	0.555256	-0.0447623	0.0150469	-0.183016	0.289438	0.080295	0.0857182	-0.129908	2.85955e-08	-0.403302	0.263019	-0.0848214	0.0422708	-0.153267	0.762091	0.0229803
PRAD	HK2	0.150206	-0.0659796	0.00683177	0.123699	0.0810918	0.0799518	0.224469	0.0557217	0.650514	0.020796	0.0371021	0.0954814	0.00275349	0.1368	0.697562	0.0178388	0.162627	0.0640342	0.883025	0.00675454	0.0169644	0.109274	9.48351e-06	0.201223	0.000939851	-0.150987	0.967356	0.00187876	0.417632	-0.0371967	0.000383003	0.161963	0.480097	0.0324088	NA	NA	4.32985e-06	-0.208614	0.450149	0.0346572	0.72179	0.016345	0.0296156	-0.0996088
READ	HK2	0.428906	0.063578	0.0259664	0.177714	0.180406	0.107453	0.0469694	-0.158807	0.00183927	-0.246723	0.0645931	0.147861	0.626553	-0.0391315	0.00854128	-0.209232	0.510998	0.0528427	0.956167	0.00442189	0.00337822	-0.232565	0.0426312	-0.162021	0.0395962	-0.164436	0.313227	-0.0809999	0.0233345	0.180948	0.176926	0.108312	0.320194	0.0798458	NA	NA	0.000881633	-0.262846	0.86162	-0.014023	0.212029	0.100151	0.168178	-0.110529
STAD	HK2	0.00412326	-0.148802	0.179437	-0.069944	0.0185764	0.122329	0.000351442	-0.18483	0.106446	0.0840632	1.49159e-06	0.247128	0.879039	-0.00793856	0.145758	-0.0757728	1.5714e-07	0.268508	1.08968e-06	-0.250228	5.87076e-07	-0.256219	2.3227e-07	0.264929	0.000341221	-0.185222	1.18985e-10	0.326705	0.764799	-0.0156058	0.0654142	0.0958863	0.523094	0.0333018	0.418765	-0.0421593	2.00889e-05	-0.219699	0.00462393	0.146933	0.239941	-0.0612422	1.0565e-05	-0.226796
THCA	HK2	0.0735741	-0.0804939	0.0123759	0.11235	0.865176	0.00765067	0.753172	-0.014169	0.570634	-0.0255505	0.0500374	0.0881308	0.988726	-0.000636693	0.00138228	0.143373	0.437233	0.0349957	0.0355137	0.0945255	0.259437	-0.0507831	0.639366	-0.0211124	0.0259471	-0.100098	0.618652	0.0224266	0.0191516	-0.105264	0.0119244	-0.112937	0.229823	0.0540698	NA	NA	0.101357	-0.0737226	0.564846	-0.0259352	0.918129	-0.00463177	0.142323	-0.0660405
UCEC	HK2	0.189835	-0.0572545	0.697334	0.016997	2.08327e-05	0.184406	0.211973	-0.0545115	0.00330644	0.127868	0.0231305	0.0990242	0.501961	0.0293383	0.302311	0.0450594	0.0162555	0.104742	0.000181324	-0.162533	0.000122479	-0.166704	0.0449728	0.0874587	0.264838	-0.0487046	0.779846	0.0122163	0.599433	-0.0229521	4.37894e-06	0.198716	0.0861865	-0.0748884	NA	NA	0.0108242	-0.111033	0.000145185	0.164908	0.000775449	0.146125	4.09073e-18	-0.36597
BLCA	HKDC1	0.940122	-0.00378191	0.00779469	-0.133367	0.74708	-0.0162355	0.342506	0.0477637	0.478003	0.0357109	0.320155	0.0500209	0.0247627	0.112674	0.0546641	0.0965182	0.906164	-0.00593479	0.08455	0.0866793	0.360721	-0.0459927	0.178479	0.0676623	0.0509664	0.0980292	0.932859	0.00424165	0.0226924	-0.114344	0.00194317	0.155071	0.46046	0.037148	0.0818128	-0.0874497	0.558311	0.0294645	0.607455	-0.0258596	0.771251	-0.0146371	0.000919394	-0.165701
BRCA	HKDC1	NA	NA	NA	NA	NA	NA	NA	NA	NA	NA	NA	NA	NA	NA	NA	NA	NA	NA	NA	NA	NA	NA	NA	NA	NA	NA	NA	NA	NA	NA	NA	NA	NA	NA	NA	NA	NA	NA	NA	NA	NA	NA	NA	NA
CESC	HKDC1	0.086012	-0.109689	0.410162	-0.0527434	0.0217937	0.146214	0.104095	-0.103875	0.0279589	0.140152	0.567057	0.0366688	0.00124119	-0.204746	0.15687	-0.0905359	0.549861	0.0383061	0.254003	0.0730018	0.415471	-0.0521484	0.325546	0.0629402	0.792558	0.0168523	0.896979	0.0082974	0.181768	-0.0854171	0.751619	-0.0202808	0.365546	0.0579376	NA	NA	0.0975236	-0.105887	0.205406	-0.0810162	0.345663	-0.0603784	0.385353	-0.0555868
CHOL	HKDC1	0.917003	-0.0182769	0.58537	0.0954724	0.528404	-0.110243	0.475661	0.124624	0.771339	-0.0509427	0.189638	0.227047	0.0368995	0.354086	0.884436	-0.0254902	0.750689	-0.0556869	0.171748	-0.236294	0.213385	0.215674	0.491289	0.120282	0.607455	0.0899223	0.841886	-0.0349785	0.422382	-0.140028	0.64245	-0.0812993	0.193341	0.22521	0.0926037	-0.288675	0.0992518	-0.283193	0.380555	0.152897	0.911729	-0.0194428	0.617529	-0.0874194
COAD	HKDC1	0.574011	-0.0270261	0.383517	0.0418843	0.0600993	0.0902179	0.00295883	-0.14218	0.00681987	-0.129545	0.0316872	0.103027	0.973378	-0.00160471	1.87186e-05	-0.203626	NA	NA	0.371706	-0.0429334	0.445187	0.0366985	0.000347807	-0.170726	0.202536	-0.0612196	0.298986	0.0499102	0.869772	0.00788328	0.245205	0.0558345	0.489553	-0.0332183	0.07051	0.0868027	0.718983	-0.0173005	0.356932	0.0442752	0.383152	0.0419164	0.198061	0.0618303
ESCA	HKDC1	0.501314	0.0762701	0.974076	-0.00369129	0.228586	0.136127	0.884041	0.0165659	0.653017	0.0510345	0.168897	0.155324	0.216716	-0.139631	0.555078	0.0669626	0.572972	0.0639633	0.496407	-0.0771442	0.251811	-0.129621	0.0977312	0.186448	0.23098	-0.135436	0.589677	0.0612027	0.678406	0.0470732	0.136691	0.167848	0.0207359	-0.258236	0.636725	0.0536085	0.964264	-0.00508918	0.727587	0.0395526	0.714409	0.0415496	0.823809	-0.0252868
HNSC	HKDC1	0.176765	-0.0611211	0.213867	-0.0562523	0.0839889	0.0781431	0.939938	-0.00341257	0.00117579	0.146165	5.26408e-06	0.20408	0.000405785	-0.159141	0.0326878	-0.0965112	0.0155122	0.109285	0.376163	-0.040066	0.724405	-0.0159676	0.000305829	0.162428	0.129775	-0.0685348	0.433386	-0.0354704	0.63489	0.0215042	0.000218131	-0.166276	0.507727	0.0299932	0.000522816	0.15614	0.000353188	-0.160762	0.103995	-0.0735338	0.0393599	-0.0931151	0.158531	-0.0637967
KIRC	HKDC1	0.400663	0.0373674	0.00427066	-0.12658	0.156456	-0.062966	0.359751	0.0407173	0.0773686	-0.0784332	0.0563964	0.0847085	0.465329	0.0324644	0.00273142	0.132685	0.61797	-0.0221795	0.00961668	-0.114785	0.432642	0.0348898	0.000157534	0.166895	0.578648	0.0246972	6.59801e-05	-0.176091	0.0366305	0.092751	0.976503	-0.00130998	0.694696	-0.0174556	NA	NA	0.687356	-0.0178983	0.266048	0.0494379	0.165102	-0.061681	0.00545227	0.123133
LIHC	HKDC1	0.000567946	0.179545	0.00887201	-0.136802	0.339404	-0.0501455	7.22366e-07	0.255916	0.584984	0.0286776	2.25975e-13	0.371268	0.0638343	-0.0971117	0.0404812	-0.107298	0.871674	0.00848394	0.000483975	-0.181747	3.25885e-06	-0.240822	0.00278921	0.156082	0.00216885	-0.16	0.0117495	-0.131757	0.154981	-0.0745912	0.407577	0.0434768	0.384956	0.0456079	0.149392	-0.0756124	0.0158028	-0.126252	0.926396	0.00485204	0.00115864	-0.169404	1.20606e-05	0.226861
LUAD	HKDC1	0.117056	0.069899	0.623559	-0.0219143	1.56295e-08	0.248526	1.89087e-05	0.189276	0.803067	-0.0111356	0.00912429	-0.116037	0.000388584	-0.157432	0.527618	0.0282002	0.23144	-0.0533979	0.00362524	0.129356	0.000321675	0.1596	0.0115509	0.11242	0.485519	0.0311368	0.983897	-0.000901262	0.00486743	-0.125237	0.000227885	-0.163484	0.00201964	0.13721	NA	NA	0.00372378	-0.128986	0.614123	-0.0225118	0.000234696	-0.163155	0.0911636	0.0753271
LUSC	HKDC1	0.974335	0.00148791	0.00149872	-0.146052	0.0117033	0.116199	0.374862	0.0410249	0.132983	0.0694038	0.915961	0.00488037	0.00673077	-0.12484	0.00223102	0.14071	0.545555	-0.0279495	0.0134832	0.113899	4.10118e-05	0.188008	0.0543451	0.088812	0.817548	-0.0106695	0.0409956	0.094304	0.12087	-0.0716472	0.434137	-0.0361615	0.619265	0.0229781	0.0941173	0.0773092	0.29475	-0.0484301	0.0747304	-0.0822825	0.0444446	-0.0927556	0.891717	0.00629599
PAAD	HKDC1	0.749898	0.0241974	0.000979945	-0.246376	0.813013	0.0179564	0.0548948	0.144971	0.950492	0.00471366	0.0408872	0.154298	0.0062618	0.205327	0.526079	0.0481049	0.583144	0.041646	0.0776464	0.13336	0.214544	-0.094019	0.770511	0.0221433	0.746777	0.0245099	0.640038	-0.0354919	0.728767	-0.0263216	0.00737008	-0.201347	0.201429	0.0967578	0.0967716	-0.12558	0.00722807	-0.201826	0.0554064	-0.14467	0.128748	-0.114943	0.812099	-0.0180459
PRAD	HKDC1	NA	NA	NA	NA	NA	NA	NA	NA	NA	NA	NA	NA	NA	NA	NA	NA	NA	NA	NA	NA	NA	NA	NA	NA	NA	NA	NA	NA	NA	NA	NA	NA	NA	NA	NA	NA	NA	NA	NA	NA	NA	NA	NA	NA
READ	HKDC1	0.517682	0.0520107	0.898325	0.0102796	0.00255115	0.239205	0.592299	-0.0430625	0.0778366	-0.141155	0.295574	0.0840012	0.817914	-0.0185207	0.407758	-0.0665276	0.773688	0.0231311	0.980565	0.00195982	0.344641	-0.0759197	0.123514	-0.123436	0.155531	-0.11389	0.455894	0.0599327	0.408258	0.0664569	0.00589605	0.218832	0.98055	0.00196138	NA	NA	0.0284425	-0.174918	0.841333	-0.0161045	0.782761	0.0221796	0.153425	-0.11447
STAD	HKDC1	0.35011	-0.0487118	0.547636	0.0313589	0.265883	0.0579885	0.289065	-0.0552608	0.0457862	-0.103908	0.000178715	0.193624	0.654236	-0.0233603	0.350745	-0.0486478	0.0225038	0.118605	0.586587	-0.0283605	0.00156508	-0.163844	0.00766128	0.138433	0.4363	-0.0405907	0.00204452	0.159822	0.422121	-0.0418561	0.563583	-0.0301193	0.00302116	0.153775	0.768502	0.0153528	4.18448e-07	-0.259436	0.616193	-0.0261429	0.0118898	-0.13065	0.662372	-0.022774
THCA	HKDC1	0.450267	0.0340096	0.985361	0.000826773	0.867408	0.00752286	0.000333586	-0.160614	6.05385e-05	0.179259	0.000703616	-0.151787	0.0537934	0.0867353	0.284683	-0.0481805	0.10392	0.0731764	0.00417728	-0.128538	0.0017075	0.140647	0.578223	-0.0250489	0.0101944	0.115381	0.141604	-0.0661594	0.0599232	0.084623	0.127781	-0.0685425	0.879528	0.00682966	NA	NA	0.00922897	0.116911	0.243797	0.0524841	0.958303	-0.00235588	0.000811506	-0.150046
UCEC	HKDC1	0.523237	-0.0278949	0.970991	-0.00158938	0.00968849	0.112696	0.924311	-0.00415225	0.188984	0.0573646	0.0721873	-0.0784595	0.631381	-0.0209671	0.020334	-0.101143	0.180869	0.0584323	0.392769	-0.0373385	0.933289	0.0036585	7.09209e-06	0.194404	0.0901663	0.0739594	0.465781	0.0318694	0.545763	0.0263991	0.985002	-0.000821595	0.0442611	0.0877499	NA	NA	0.352703	-0.0406018	0.408209	0.0361353	0.95963	0.0022123	0.000467487	-0.152026
BLCA	HPRT1	0.314177	-0.0506419	2.30815e-06	-0.234534	0.312051	0.0508645	0.0377354	0.104322	0.418063	0.0407537	0.26542	0.0560263	0.0335872	0.106682	0.00137451	-0.160069	0.252883	0.0575182	0.0193629	-0.117329	0.795746	-0.0130322	0.684258	0.0204721	0.651166	-0.0227613	0.000143009	0.189724	1.91616e-05	-0.212738	0.00020025	0.185597	0.447976	0.0381893	0.237876	-0.0593731	0.0246741	0.112743	0.00409711	0.143775	0.480351	0.0355208	3.29031e-10	-0.308647
BRCA	HPRT1	0.117285	-0.0525391	0.570346	-0.0190491	0.00200965	0.103405	0.083783	-0.0579938	0.00727898	0.0899054	0.001276	0.107816	0.0111316	0.0850574	0.224178	0.0407838	0.000134323	0.127648	1.50802e-09	-0.200794	0.152073	-0.0480488	0.051482	0.0653004	0.00162392	-0.105494	0.00214376	0.102764	0.00150972	-0.106201	0.000965463	0.110446	0.00827561	-0.0884643	0.969373	-0.00128882	3.05346e-07	-0.170607	1.12665e-05	0.146607	0.668175	0.014388	0.200582	-0.0429427
CESC	HPRT1	0.457498	-0.0475858	0.0752997	0.113613	0.796616	-0.0165152	0.254953	0.0728563	0.0143696	0.15591	0.909251	0.00730443	0.168536	0.0880674	0.363482	0.058187	0.12863	0.0971471	0.382798	-0.0558858	0.718382	0.023107	0.110252	-0.102079	0.203707	-0.0813198	0.322171	-0.0633798	0.000263258	-0.230681	0.126676	0.0976443	0.44082	0.0493665	NA	NA	0.51998	-0.0412126	0.454172	-0.0479379	0.986696	0.0010686	0.00274147	-0.190198
CHOL	HPRT1	0.787671	-0.0472154	0.738322	0.058547	0.313572	0.175386	0.840533	-0.0352817	0.139767	0.254713	0.113742	0.272148	0.774832	-0.0501436	0.820532	0.0397759	0.022132	0.385667	0.168882	-0.237839	0.154589	-0.245834	0.11539	0.270961	0.0858538	-0.294558	0.466371	-0.127241	0.826509	0.0384304	0.974299	-0.00565085	0.375141	-0.154622	0.496441	-0.118866	0.0904956	-0.290476	0.0928022	0.288507	0.0702397	0.309682	0.701113	-0.0672457
COAD	HPRT1	0.663909	0.0208916	0.00309355	0.141532	0.175541	0.065067	0.0218518	-0.109921	0.159116	-0.0676282	0.420443	0.038725	0.17077	0.0657919	0.00456207	-0.135757	NA	NA	0.879872	-0.00726702	0.989169	-0.000652752	0.0088861	-0.125313	0.299424	-0.049865	0.10162	0.0785953	0.00287409	-0.142602	0.203171	0.0611338	0.30085	0.0497183	0.361315	0.0438736	0.616583	-0.0240725	0.0879286	0.0819151	0.0684389	0.0874475	0.0193111	-0.112138
ESCA	HPRT1	0.815696	-0.0264716	0.664551	-0.0492276	0.75976	0.0347252	0.592229	-0.0607842	0.265607	-0.125949	0.28714	0.120467	0.350058	-0.10585	0.397289	0.0959298	0.844545	0.0222706	0.0283099	-0.245283	0.347086	-0.106501	0.0434575	-0.226386	0.449852	0.0856785	0.92066	0.0113136	0.292947	-0.119036	0.00113699	0.357365	0.97333	0.00379751	0.98289	0.00243609	0.683366	-0.0463061	0.0260782	-0.248758	0.567222	0.0649222	0.211888	-0.141095
HNSC	HPRT1	0.000912411	-0.149352	0.870541	-0.00738103	0.3505	0.0422658	0.401547	-0.0379793	0.00875994	0.118304	0.625293	0.0221157	0.537128	0.0279464	0.292184	-0.0476799	0.00319608	0.132935	0.00184063	-0.140374	0.079288	0.0793529	0.0355146	-0.0950064	0.68756	-0.0182131	0.0342679	0.095657	0.00910595	-0.11771	0.564917	0.026063	0.0289854	0.09866	0.103143	0.073715	0.00582581	-0.124401	0.0719826	-0.0813538	0.0342626	-0.0956598	0.00253425	-0.136107
KIRC	HPRT1	0.41332	-0.0363734	0.0169317	0.105921	0.404052	0.0370995	0.901418	0.00550939	0.00522941	0.123728	0.00344206	0.129558	0.133882	-0.0665962	0.0174404	0.105441	0.573699	0.0250196	0.671474	0.0188624	0.356016	-0.0410346	0.0230078	0.100853	0.438952	0.0344137	0.0129069	-0.110248	0.368967	0.039943	0.0758078	0.0788487	0.228824	-0.0534855	NA	NA	0.00661959	-0.120335	0.0360157	-0.0930556	0.00664742	0.120274	0.000128249	-0.169111
LIHC	HPRT1	0.228301	-0.0632131	0.0888503	0.0891886	0.218006	-0.0646321	0.324245	0.0517406	0.193509	0.0682138	0.552246	-0.0312117	0.214899	0.0650697	0.787153	-0.0141809	0.454558	-0.0392632	0.453511	-0.0393543	0.101122	-0.085948	0.39411	0.0447367	0.433064	-0.0411581	0.575882	-0.0293753	0.90409	-0.00632871	0.794318	0.0136924	0.22781	-0.0632797	0.228574	0.0631761	0.913215	-0.00572409	7.12862e-05	0.206367	0.0916246	0.0884261	0.89718	-0.00678711
LUAD	HPRT1	0.000964026	-0.146599	0.646968	-0.0204486	0.0732805	-0.0798519	0.136602	0.0663976	0.0190374	0.104419	0.118967	0.0695374	1.28809e-09	0.266101	0.394447	0.0380131	0.283709	0.0478432	0.0238496	-0.100642	0.487383	-0.031004	0.352812	0.0414728	0.528802	0.0281194	0.927368	0.00407053	0.00897516	-0.116286	1.77366e-07	0.230034	4.48925e-05	-0.180721	NA	NA	0.538522	0.0274595	0.198929	0.0573163	0.017274	0.106015	0.94046	0.0033353
LUSC	HPRT1	5.82545e-08	-0.246966	0.0325855	0.0986018	0.0464758	0.0918904	0.000966306	0.151747	0.00130166	0.147903	0.00442648	-0.131061	0.0137143	0.11362	0.00123487	0.148589	0.244474	0.0537899	0.165109	-0.0641328	0.397103	0.0391495	0.722973	0.0163939	0.558922	-0.0270254	0.244172	0.0538244	0.112534	-0.0732952	0.00651926	0.125324	0.0100161	-0.118684	0.974367	-0.00148606	0.427744	0.0366664	0.60075	-0.0241999	0.0678465	0.0843027	9.97231e-08	-0.24269
PAAD	HPRT1	0.0569039	-0.143801	0.324955	-0.0746246	0.970335	-0.0028233	0.487067	0.0527255	0.00881947	0.196879	0.144745	-0.110377	0.086772	0.129476	0.0450543	0.151276	0.169678	0.103972	0.109066	0.121204	0.258783	0.0855756	0.957679	0.00402869	0.467239	0.0551493	0.821457	0.0171315	0.218924	-0.0931311	0.158264	-0.10681	0.00148232	0.237808	0.23597	-0.089791	0.346992	-0.0713062	0.677142	0.0316022	0.67447	-0.0318794	0.0264889	-0.167273
PRAD	HPRT1	0.496176	-0.0312332	0.745192	-0.0149184	0.545416	0.0277522	0.500302	0.0309348	0.640383	-0.0214437	0.611851	0.0232917	4.69839e-05	0.18523	5.4664e-05	0.183646	0.0443162	-0.0921272	0.859521	0.00812472	0.0364138	-0.0958296	0.448856	0.0347562	0.0428465	-0.092771	0.947062	0.00304807	0.00447728	-0.129934	0.0549315	0.0879445	0.710422	0.0170436	NA	NA	0.00441339	-0.130142	0.190295	-0.0600708	0.670051	0.0195582	0.478567	-0.0325218
READ	HPRT1	0.917279	-0.00835574	0.201328	0.102528	0.0016952	0.248563	0.544879	-0.0486807	0.278815	-0.0869626	0.122324	0.123826	0.304761	0.082425	0.308507	-0.0817912	0.43143	-0.0632316	0.747534	0.0258924	0.0112867	-0.20174	0.269727	-0.0886188	0.10217	-0.130925	0.177354	-0.108206	0.483837	0.056283	0.0128462	0.198175	0.594451	-0.0428125	NA	NA	0.0168379	-0.190533	0.26654	0.0892087	0.0164947	0.191124	2.27956e-05	-0.331098
STAD	HPRT1	0.00139512	-0.165547	0.0976968	-0.0862291	0.31457	-0.0524242	0.864581	0.00889618	0.178033	0.0701698	0.00204246	0.159838	0.0122511	0.130106	0.413909	0.0426005	0.0360804	0.109011	0.000628161	-0.176947	6.21725e-08	-0.276799	0.0142584	0.127317	0.0277825	-0.114402	0.0213232	0.119661	0.0740727	-0.0929716	4.25165e-05	0.211115	0.64901	0.0237385	0.870114	-0.00852935	0.0979778	-0.0861572	0.000502397	0.180018	0.00835338	0.136931	2.57317e-05	-0.216902
THCA	HPRT1	0.125209	-0.0690076	0.0102686	0.115269	0.185044	0.0596693	0.357667	0.0414298	0.184891	-0.05969	0.0967939	0.0747229	0.207443	-0.0567588	0.00876854	0.117691	0.0929823	0.0755877	0.879104	0.00685387	0.0916723	-0.0758914	0.957083	0.00242489	0.532596	-0.0281144	0.253606	0.0514087	0.573219	-0.0253793	0.0403354	-0.0921908	0.278409	-0.0488121	NA	NA	0.0606507	-0.0843843	0.00348951	-0.131052	0.373757	-0.0400634	0.419766	-0.0363441
UCEC	HPRT1	0.38656	-0.0378304	0.750961	0.0138705	0.00521629	0.121633	0.0443295	-0.0877217	0.0811991	0.0761028	0.0982921	-0.0721602	0.0047458	0.122949	5.74746e-05	0.174477	0.703125	-0.0166555	0.797015	0.0112414	0.0246872	-0.0979391	0.610511	-0.0222587	0.259357	-0.0492666	0.116968	-0.0684344	0.289809	0.0462398	0.000331468	0.155917	0.763484	-0.013151	NA	NA	0.0394589	-0.0898249	3.91029e-08	0.236736	1.97897e-06	0.205622	8.50081e-25	-0.427618
BLCA	IMPDH1	0.599629	0.0264244	0.793975	-0.0131478	0.0100527	-0.129052	0.36622	-0.0454691	0.168543	-0.0692401	0.000488484	0.174216	0.000218518	0.184513	0.0360258	0.105267	0.000776405	0.168016	7.30599e-05	-0.197708	0.028694	-0.10981	0.14482	0.0733113	0.100851	-0.0824661	0.000583622	0.17186	0.108325	-0.0807142	7.69832e-06	0.222397	0.193763	-0.0653577	0.578696	-0.0279519	0.930259	-0.00440634	0.0340287	-0.10642	0.500738	0.0338905	2.32335e-05	-0.21064
BRCA	IMPDH1	0.925688	0.00313084	0.214299	-0.0416667	0.962172	0.00159202	0.00110352	-0.109193	0.44735	-0.0255016	0.000450136	0.117373	0.605052	0.017358	0.574514	-0.0188435	0.203024	-0.042711	8.97773e-05	-0.130906	0.187325	-0.0442379	0.941799	-0.00245071	0.171413	-0.045885	0.827625	-0.0073091	0.868566	0.00555468	0.379291	0.029506	0.00020943	-0.123966	0.254975	0.0381972	0.209848	0.0420741	0.052092	0.0651309	0.096749	-0.055706	3.1791e-05	0.13897
CESC	IMPDH1	0.731991	-0.0219448	0.248242	-0.0738922	0.971669	0.00227594	0.102243	-0.104432	0.132653	0.0961412	0.0016309	0.199845	0.00236438	-0.192992	0.27205	0.0702999	3.31944e-06	0.291494	0.00327207	-0.186806	0.12292	-0.098617	0.196387	0.0826494	0.551567	-0.0381427	0.350756	0.059745	0.900312	0.00802753	0.899608	-0.00808446	0.845846	0.0124588	NA	NA	0.00259458	-0.191242	0.700592	-0.024638	0.470157	-0.0462582	0.254615	-0.0729081
CHOL	IMPDH1	0.673228	0.0738693	0.746207	0.0567218	0.402918	0.145921	0.735584	-0.0591822	0.329449	-0.169809	0.0316417	0.363891	0.0547068	-0.327614	0.74681	-0.0565826	0.442291	0.134155	0.391718	-0.149386	0.0430294	-0.343997	0.101343	0.281527	0.177308	-0.23335	0.245121	-0.20176	0.759768	-0.0535964	0.649198	-0.0796588	0.0435873	-0.343137	0.240351	0.203771	0.0543965	-0.328011	0.80716	0.0427943	0.00870853	0.436762	0.646086	0.0804147
COAD	IMPDH1	0.219322	0.0590125	0.150858	0.0689917	0.66196	0.0210207	0.00046156	-0.167212	0.00333576	-0.140427	0.00046901	0.167011	0.184901	-0.0636867	4.62193e-06	-0.217642	NA	NA	0.0996804	-0.079043	0.0350109	0.101114	0.000153094	-0.18055	0.0154017	-0.116105	0.0949517	0.0801643	0.0505653	-0.0938054	0.977518	-0.00135505	0.24049	-0.0563951	0.461759	0.035377	0.524448	0.0305989	0.470272	-0.0347085	0.846937	-0.00928151	0.076444	0.0850374
ESCA	IMPDH1	0.746876	-0.0366504	0.662735	-0.0495112	0.0987577	0.18589	0.774811	0.0324885	0.409588	-0.0934641	0.253196	0.129246	0.000808422	-0.367138	0.0386456	0.231693	0.315435	0.113662	0.0847275	-0.193955	0.880834	0.0170275	0.374612	0.100598	0.427725	0.0899054	0.671272	0.0481804	0.456273	0.0844737	0.350954	0.105654	0.357948	-0.104138	0.533473	0.0706462	0.0866786	-0.192773	0.250367	-0.130013	0.885726	-0.0163236	0.184365	-0.149931
HNSC	IMPDH1	0.0258218	-0.100692	0.0699227	-0.0819479	0.253723	0.0516586	0.893461	-0.00606558	0.443567	0.0346909	1.42886e-05	0.194652	0.130806	-0.0683517	0.0701419	0.081884	0.00038471	0.159765	0.00454004	-0.128006	0.751511	0.0143406	0.547996	0.0272043	0.903333	0.00550063	0.0487946	0.0890633	0.0182562	-0.106599	0.0656764	-0.0832193	0.0012637	0.145248	0.302557	0.0466681	3.50004e-09	-0.262784	9.37565e-10	-0.271928	0.00193062	-0.139744	2.66053e-08	-0.247983
KIRC	IMPDH1	0.173272	0.0605122	0.000841347	-0.147687	7.36458e-08	-0.23599	0.245181	-0.0516542	0.00102403	-0.145281	1.04152e-11	0.295686	0.00357923	-0.129023	0.00567818	0.122552	0.519424	0.0286479	8.39196e-08	-0.234986	0.000322155	-0.158958	0.0183541	0.104607	0.00538411	-0.123313	0.0201636	-0.103059	4.57497e-07	0.221521	1.40607e-06	0.212119	0.00928241	-0.115321	NA	NA	0.964159	0.00199861	0.191439	0.0580533	0.167363	-0.0613533	1.83716e-07	0.228868
LIHC	IMPDH1	0.0125686	0.130523	1.65862e-05	-0.223325	0.265516	-0.0584311	0.00566428	0.144545	0.351381	0.0489171	2.02724e-17	0.424737	0.0126356	-0.130425	0.00169377	-0.163767	0.464649	0.0383911	2.71528e-06	-0.242703	1.21707e-05	-0.22676	0.340755	0.0500056	0.00143217	-0.166279	0.0091127	-0.136328	0.0342443	0.110857	0.00207228	0.1607	0.165098	-0.0728113	0.690753	0.0208929	0.606117	-0.0270769	0.564173	0.0302804	0.117016	-0.0821858	0.000217259	0.192413
LUAD	IMPDH1	0.193009	-0.0580789	0.0532327	-0.0861577	0.0254238	-0.0995502	0.580942	0.0246459	0.782984	-0.0122988	0.0021633	0.136309	0.50862	0.0295096	0.000198692	0.165004	0.190327	0.05843	0.215838	-0.0552253	0.0370968	0.0928896	0.403242	0.0373111	0.947687	-0.00292987	0.0321259	0.0954687	0.0342293	-0.0943385	0.832983	0.00941641	0.00540393	-0.123747	NA	NA	0.445343	-0.0340704	0.0254472	0.0995344	0.0126063	-0.111055	0.0464074	0.0887612
LUSC	IMPDH1	0.0113748	-0.116657	0.685785	-0.0187101	0.863917	-0.00792661	0.0841877	0.0797409	0.571568	0.026161	2.65377e-05	0.192489	0.00164354	-0.144829	0.000787114	0.154342	0.0115924	0.116352	0.0502394	-0.0903679	0.785813	0.0125679	0.0648777	-0.0852262	0.208525	-0.0581159	0.00657576	0.125193	0.00758118	-0.123025	0.0667036	-0.0846543	0.775524	0.0131879	0.375572	0.040964	0.0209557	-0.106477	0.000958085	-0.151855	0.000139074	-0.174844	0.020537	-0.106826
PAAD	IMPDH1	0.306503	-0.0775168	0.807967	-0.0184504	0.245829	0.087936	0.0921814	-0.127326	0.763929	0.0227974	0.0244126	0.169621	0.141405	-0.111297	0.0843644	0.130468	0.601231	-0.0396619	0.738548	-0.0253358	0.482736	-0.0532502	0.10549	0.122435	0.857643	-0.0136174	0.485872	-0.05287	0.936127	0.00608395	0.585593	0.0413757	0.128901	-0.114897	0.973921	-0.00248186	0.379217	-0.0666841	0.939335	-0.00577778	0.853795	-0.0139896	0.455574	0.0566017
PRAD	IMPDH1	0.0552309	-0.0878367	0.720693	-0.0164123	0.132928	0.0689009	0.221079	-0.0561308	0.829884	-0.00986294	0.00110408	0.148939	0.125144	-0.0703134	0.583253	-0.0251825	0.056769	-0.0872903	0.271244	0.0504751	0.707888	0.0171999	0.796718	-0.0118252	0.353858	0.0425428	0.655195	-0.0204981	0.00111604	0.148802	0.194133	-0.0595554	0.00795884	-0.121379	NA	NA	0.214996	-0.0568764	0.929888	0.00403918	0.142322	-0.0672787	0.401703	0.0384829
READ	IMPDH1	0.58641	-0.0437484	0.282782	0.0862512	0.0583745	0.151406	0.49386	-0.0550019	5.35013e-05	-0.316606	0.0131592	0.197505	0.360352	0.0734891	0.136963	-0.11922	0.907796	0.00931764	0.777293	0.0227526	0.00312975	-0.23439	0.157932	-0.113237	0.797302	-0.020661	0.385594	-0.0697177	0.31594	0.0805486	0.424783	0.0641463	0.397738	-0.0679567	NA	NA	0.0618282	-0.149401	0.78238	0.0222194	0.316624	0.0804351	0.705523	0.0303936
STAD	IMPDH1	0.129543	-0.0789523	0.459355	0.0385822	0.0917397	-0.0877938	0.413723	-0.0426174	0.59566	-0.0276756	1.62521e-06	0.246273	0.631344	-0.0250262	0.0150472	-0.126315	0.0134621	0.128379	0.00725395	-0.139374	0.0807428	-0.0909102	0.0142532	0.127324	0.119936	-0.0809839	0.0107848	0.132411	0.850374	-0.00984003	0.614585	-0.0262621	0.000741328	0.174638	0.377008	-0.0460585	0.00100693	-0.170291	0.937647	-0.00408065	0.0222948	-0.118788	0.23075	-0.0624538
THCA	IMPDH1	0.007382	0.120283	0.732529	-0.0153992	0.0316311	0.0966105	3.41468e-09	0.261668	9.10394e-10	-0.270795	0.000481907	0.156321	0.0849729	0.0775016	0.254347	-0.0513286	0.226387	-0.0544702	0.133012	-0.0676184	6.93033e-06	-0.200523	0.118191	0.070316	0.0573102	-0.0855004	0.0138166	-0.110598	0.00371332	0.130188	0.000637052	0.15299	4.2008e-05	-0.183014	NA	NA	0.0588474	-0.0849803	0.235702	0.0533946	0.940821	0.0033452	0.000183299	0.16738
UCEC	IMPDH1	0.293068	0.045929	0.000401999	-0.153745	0.167626	0.060254	0.476754	-0.0310908	0.514507	-0.0284834	0.512582	0.0286139	0.081101	0.0761272	0.0412954	0.0890074	0.715315	0.0159398	0.868233	-0.00725086	0.322431	-0.0432258	0.273073	0.0478749	0.432287	0.0343115	0.087015	-0.0746922	0.0200615	0.101363	0.708561	0.0163358	0.0477544	-0.0863565	NA	NA	0.848728	-0.0083364	0.104397	0.070885	0.0977419	0.0722782	0.000113714	-0.167482
BLCA	NME1	0.123615	-0.0774073	0.113691	-0.0795142	0.0219261	0.114995	0.883435	-0.00738164	0.611874	0.0255421	0.8925	0.00680391	0.0672952	-0.0919252	0.658673	-0.0222379	0.611859	0.0255432	0.0169807	-0.119753	0.11566	0.0790849	0.971457	-0.00180148	0.578348	0.0279775	0.111339	0.0800346	0.778477	-0.0141622	0.643945	0.0232669	0.0710846	-0.0906864	0.269213	0.0555845	0.0753383	0.0893584	0.14709	0.0729007	0.192585	-0.0655305	0.0196743	-0.117031
BRCA	NME1	0.639682	-0.0157222	0.059466	-0.0632376	0.0101998	0.086122	0.0112179	-0.0850149	0.330423	0.0326795	0.0341994	0.071036	0.0493946	0.0659307	0.174912	0.045539	0.32061	0.0333487	8.96844e-07	-0.163893	0.0176537	-0.079567	0.912345	0.00369718	0.757182	0.010384	0.68238	-0.0137434	0.219054	0.0412614	0.137844	0.0498065	1.51373e-05	-0.144553	0.485726	0.0234105	0.669894	-0.0143169	1.37945e-06	0.161092	0.342407	0.0318793	0.0128303	0.0834316
CESC	NME1	0.870568	-0.0104414	0.629783	-0.0308832	0.823243	0.0143141	0.108128	-0.102689	0.127241	0.0975	0.903933	-0.0077345	0.0679141	-0.116591	0.469547	0.0463217	0.114529	0.100877	0.0935739	-0.107149	0.604077	0.0332214	0.611713	-0.0325224	0.00855558	0.167308	0.159346	-0.0900008	0.501193	-0.0430838	0.472763	0.0459875	0.00357687	-0.185077	NA	NA	0.873277	0.0102209	0.674169	0.0269382	0.269148	-0.0707259	0.281312	0.0689604
CHOL	NME1	0.427176	-0.1386	0.884153	0.0255529	0.363597	-0.158349	0.575908	0.0978783	0.11437	-0.271694	0.292136	0.183206	0.621001	-0.0865607	0.865547	-0.0296919	0.800017	-0.0444115	0.290589	-0.183784	0.959893	0.00882043	0.123256	0.26546	0.328377	0.17018	0.256182	-0.197198	0.351707	-0.162262	0.291184	-0.183561	0.67758	0.0728291	0.240351	-0.203771	0.669384	-0.0747899	0.767319	0.0518633	0.248769	0.200241	0.665795	0.0756514
COAD	NME1	0.575601	-0.026914	0.835812	0.00996549	0.00034043	0.170989	0.879638	-0.00728126	0.423632	0.0384601	0.174182	-0.065272	0.802399	-0.0120325	0.175645	-0.0650515	NA	NA	0.0732289	-0.0859794	0.00431056	0.136613	0.462855	0.0352906	0.535597	0.0297811	0.531139	0.0301071	0.0239972	-0.108217	0.000368679	0.170008	0.590195	-0.0258918	0.444186	0.0367793	0.412668	0.0393761	0.598087	0.0253439	0.00918915	0.124768	0.0425408	-0.0972934
ESCA	NME1	0.540971	-0.0693596	0.429019	-0.0896548	0.159016	0.158961	0.852979	-0.0210482	0.980362	0.00279607	0.304927	0.116141	0.0632449	-0.208663	0.398162	0.0957534	0.17608	0.152776	0.0507587	-0.219195	0.426792	0.0900865	0.316059	0.113517	0.161066	0.158193	0.315112	-0.113738	0.241187	0.132543	0.212099	0.141031	0.0188722	-0.262039	0.311876	-0.114496	0.135743	0.168248	0.817073	0.0262703	0.307727	0.115475	0.817303	-0.0262367
HNSC	NME1	0.0163609	0.108412	0.00781752	-0.120032	0.412193	-0.0371277	0.00604018	-0.123872	0.0733067	0.0809793	0.765902	-0.0134843	0.739278	-0.0150725	0.120551	0.070226	0.000877677	0.149835	3.3553e-06	-0.208192	0.536805	0.0279686	0.408334	-0.0374348	0.0171453	0.107641	0.298097	-0.0471003	0.478107	0.0321189	0.250425	0.0520186	0.000113187	-0.173515	0.0259212	0.100625	0.285642	0.0483304	0.319212	0.0450905	0.9596	0.00229423	0.857331	-0.00814198
KIRC	NME1	0.0144004	0.10852	3.62898e-08	-0.241351	0.0153181	-0.107535	0.126691	-0.0678512	0.281267	-0.0478959	1.27727e-08	0.249038	0.0123924	-0.110885	0.0183577	-0.104604	0.819174	-0.0101676	2.24015e-05	-0.186898	0.0682583	-0.0809624	0.743587	0.0145481	0.0335274	0.0943351	0.00317844	-0.130643	2.91233e-05	0.18433	0.000172877	0.165884	3.93832e-06	-0.203103	NA	NA	0.00146129	0.140833	4.49126e-05	0.180011	0.362106	0.0405183	3.2819e-12	0.302502
LIHC	NME1	0.308256	0.0534763	0.00298999	-0.154984	0.482821	-0.0368464	0.764273	-0.0157492	0.0106727	0.133502	2.2225e-11	0.340831	0.000965528	-0.17205	0.407814	-0.0434548	0.0074393	-0.139885	0.0729848	-0.0939606	0.166486	-0.0725735	0.657995	-0.0232477	0.824833	0.0116246	0.424562	0.0419225	0.77289	0.015157	0.0179638	0.123809	0.000322944	-0.187207	0.556967	0.0308419	0.954988	0.0029646	0.0629026	0.097453	0.800323	-0.0132839	2.39038e-05	0.219198
LUAD	NME1	2.09696e-05	-0.188272	0.632723	0.0213378	0.735543	0.0150817	0.176104	-0.0603556	0.0147279	0.10859	0.28032	0.0481809	0.0597366	0.083924	0.193729	0.0579852	0.287925	0.0474268	0.000159167	-0.167437	0.596564	-0.0236344	0.966668	0.001866	0.000766632	0.149399	0.760184	-0.0136297	0.689106	-0.0178634	0.000503875	0.154406	2.38744e-09	-0.261876	NA	NA	0.278482	0.0483652	0.00226508	0.135702	0.138797	0.0660291	0.435548	0.034808
LUSC	NME1	0.00309788	-0.136162	0.333642	0.0446921	0.0250718	0.103335	0.0932882	0.0775042	0.00933816	0.119789	0.000225753	-0.169349	0.011111	0.117033	0.980097	-0.00115383	0.0894309	0.0784298	0.00201376	-0.142103	0.333848	0.044673	0.998711	7.47e-05	0.696438	0.0180421	0.368145	-0.0416046	0.19085	-0.0604425	0.00803377	0.122132	0.00165602	-0.144728	0.583329	0.0253652	0.00847959	0.121296	0.153428	0.0659509	0.010021	0.118677	0.0315377	-0.0992017
PAAD	NME1	0.0224291	-0.17203	0.101679	0.123783	0.351534	0.0706389	0.526909	-0.0480085	0.151115	0.108666	0.666853	0.0326721	0.799727	-0.0192588	0.654484	0.033967	0.854431	-0.013928	0.687663	0.0305145	0.0663737	-0.138704	0.0443069	0.1518	0.395888	0.0643872	0.328302	-0.0741115	0.0651494	0.139328	0.736129	-0.0255792	0.15706	-0.107118	0.503883	0.0507109	0.862937	0.0131058	0.540401	0.0464529	0.952628	0.0045101	0.898795	0.00965543
PRAD	NME1	0.707821	-0.017204	8.96448e-06	-0.201763	0.883188	0.00674503	2.09178e-05	-0.193481	0.0488192	-0.0902604	0.252232	0.052525	0.045076	-0.0918014	0.0155815	0.110689	1.61983e-05	-0.196016	0.094207	0.0767177	0.0535843	-0.0884358	0.000571996	-0.157147	0.00281423	0.136498	0.363838	-0.0416692	0.00122911	0.147561	0.333712	-0.0443551	4.31132e-06	-0.208653	NA	NA	0.160277	0.0643934	0.0339274	-0.097136	0.57419	-0.0257906	0.000191959	0.169958
READ	NME1	0.330427	-0.0781799	0.781421	-0.0223199	0.000190056	0.293592	0.911098	0.00898252	0.0874708	0.136836	0.032506	-0.170751	0.704454	-0.0305094	0.926599	0.00741147	0.204589	0.101794	0.134377	-0.120005	0.397743	0.0679559	0.802437	-0.0201265	0.776976	-0.0227859	0.792115	0.0212018	0.528727	0.0506479	0.00123366	0.255606	0.376544	0.0710519	NA	NA	0.363608	-0.0729937	0.829375	-0.0173363	0.707458	0.0301844	0.00977359	-0.205639
STAD	NME1	0.00238862	-0.157439	0.125188	-0.0798583	0.340788	0.0496613	0.153041	-0.0744323	0.946442	-0.00350414	0.0011711	0.168109	0.163567	0.0725778	0.510907	-0.0342839	5.05833e-05	0.209075	1.83054e-07	-0.267116	1.95969e-05	-0.219977	4.90927e-05	0.209428	0.399537	-0.0439243	0.10243	0.0850392	0.529672	0.0327767	0.00498947	0.145679	0.0897583	-0.0883323	0.109485	-0.0833439	0.344019	-0.0493304	0.00370408	0.150533	0.696702	0.0203302	0.0821081	-0.0905053
THCA	NME1	0.00753309	0.119981	3.08992e-05	-0.186113	0.864842	0.00766984	0.492686	-0.0309061	0.534737	-0.0279677	0.754263	0.0141043	0.157874	-0.0635727	0.365269	0.0407796	0.361856	0.0410704	0.954973	0.00254423	0.236548	0.0532985	0.7834	-0.0123863	0.00639991	0.122398	0.978801	0.00119735	0.0771043	0.0795292	0.227914	-0.0542917	0.0038397	-0.129721	NA	NA	0.270018	0.0496721	0.514233	-0.0293849	0.157852	-0.0635761	0.156212	0.0638275
UCEC	NME1	0.550037	0.0261189	0.00729294	-0.116868	0.766011	-0.0130062	0.0260913	-0.09701	0.0674254	-0.0798033	0.519785	-0.028127	0.200809	0.0558672	0.643705	0.0202131	0.914351	0.00470067	0.110285	0.0697098	0.89507	-0.00576442	0.253308	-0.0498966	0.0050374	0.12212	0.0299952	-0.0946359	0.035849	0.0915305	0.163629	0.0608248	1.52842e-06	-0.207818	NA	NA	0.00106981	0.142256	0.031502	0.0937902	0.730433	-0.015058	0.165406	-0.0605697
BLCA	NPR1	0.721551	0.0179417	0.0002649	0.182099	2.98965e-05	-0.207863	0.0038696	-0.144667	0.00628253	-0.136933	0.0492626	0.0987564	0.0812481	0.0876112	7.52869e-08	0.265883	0.898686	-0.00641021	0.00217409	0.153418	0.710641	0.018677	0.251488	0.0576873	0.051093	-0.097976	0.0876558	-0.0858292	0.246985	-0.0582377	0.185156	0.0666383	0.822551	0.0112908	0.054276	-0.0966728	0.296447	-0.0525305	2.98207e-05	-0.207891	0.0960369	0.0836501	0.0334421	-0.106769
BRCA	NPR1	0.635744	0.0158984	0.00743382	0.0896704	4.92325e-05	-0.135627	0.00466979	0.0947471	0.00569447	-0.0926097	0.0847167	-0.0578199	0.0767923	0.0593485	0.0706834	-0.0606172	0.486003	-0.0233824	0.0740738	0.0599025	0.951992	0.00202093	0.000313532	-0.12053	0.010129	-0.0861541	0.350487	-0.0313322	0.00207249	-0.1031	0.184295	-0.0445433	3.98396e-09	0.195627	0.152171	-0.0480374	0.00132288	0.107471	2.14243e-05	-0.141922	0.00496485	0.0940914	0.103369	-0.0546314
CESC	NPR1	0.839192	0.0130038	0.483274	0.0449032	0.0177854	-0.151011	0.931585	0.00550163	0.0211344	-0.146948	0.44318	0.0491122	0.258041	0.0723861	0.173385	0.0870787	0.235935	-0.0758436	0.0082079	0.168191	0.00122579	-0.204968	0.702285	0.0244917	0.268505	0.0708208	0.0433073	-0.128956	0.423028	0.051309	0.0926529	-0.107449	0.421217	0.0515093	NA	NA	0.698941	-0.0247807	0.123334	-0.0985086	0.0471231	0.126706	0.385073	-0.0556195
CHOL	NPR1	0.901497	-0.0217069	0.312789	0.175666	0.894965	-0.0231542	0.135506	0.257393	0.961387	-0.00849163	0.303466	-0.179029	0.910964	0.019612	0.195848	-0.223981	0.768175	0.0516672	0.914245	-0.0188865	0.619483	-0.086936	0.119014	-0.268393	0.579043	-0.0970792	0.938939	0.0134357	0.0936973	0.287753	0.963522	-0.00802169	0.841706	0.0350189	0.282565	0.186816	0.170159	0.237148	0.229111	0.208616	0.767502	0.0518213	0.478387	-0.123862
COAD	NPR1	0.114566	0.0757684	0.947522	0.00316489	0.00482584	-0.134904	0.00246259	-0.144827	0.00172487	-0.149842	9.26313e-16	0.372432	0.0732841	0.085963	0.142417	0.0704454	NA	NA	0.44546	0.0366765	0.0132343	-0.118704	0.924142	-0.00457849	0.0424402	-0.0973406	0.706301	0.0181182	0.00286499	-0.142648	0.000958841	-0.157796	5.25933e-05	-0.192621	0.446966	0.0365554	0.00313405	-0.141342	0.181005	-0.0642548	0.657139	0.0213408	0.0975204	0.0795498
ESCA	NPR1	0.873003	-0.0181555	0.00233456	0.335679	0.143304	-0.165108	0.675791	0.0474785	0.104458	-0.182869	0.136034	-0.168125	0.135001	0.168564	0.722646	-0.0402999	0.0121813	-0.279074	0.0012149	0.355429	0.940513	0.00847659	0.916283	-0.01194	0.475602	-0.0809024	0.320714	-0.112437	0.995713	0.00061029	0.479731	-0.0801495	0.0749549	0.200223	0.236039	-0.133991	0.291491	-0.119393	0.940608	0.00846309	0.373048	-0.100926	0.259235	0.127629
HNSC	NPR1	0.0647636	-0.0835013	0.000389512	0.15962	0.00766024	-0.120338	0.00371175	-0.130854	0.000837193	-0.150419	0.206314	0.0571905	0.335334	-0.0436138	0.0389365	0.0933155	0.0279916	-0.0992768	0.0146374	0.110229	0.507712	-0.0299942	0.00869598	0.118415	0.000712436	-0.152402	0.429231	-0.0357915	0.0387681	0.0933956	0.317504	-0.0452498	0.711511	0.0167487	0.332425	0.0438768	0.297638	-0.047145	0.927899	-0.00409831	0.462437	0.0332725	0.00284831	0.134518
KIRC	NPR1	0.00359867	-0.128948	0.000609013	0.151568	0.0514759	-0.0864571	0.547049	0.0267789	9.19119e-09	-0.251408	0.918701	-0.0045398	0.405559	0.0369807	1.60219e-07	0.229949	0.0278943	0.0975621	0.000107664	0.170975	2.57947e-05	0.185522	0.0480978	0.0877401	0.00298784	-0.131479	8.39457e-07	0.21649	0.022759	-0.101036	0.000692779	-0.150031	6.83551e-07	0.218207	NA	NA	0.000106275	-0.171113	3.41368e-08	-0.241809	2.56142e-07	-0.226221	0.00043244	-0.155582
LIHC	NPR1	0.746078	-0.0170064	0.359216	-0.0481279	0.623982	0.025743	0.0455405	0.104736	0.58472	0.0286978	9.28308e-05	-0.203145	0.770574	-0.015316	0.000102209	0.201959	0.294271	0.0550438	0.00743951	0.139885	0.000808929	0.174583	0.17551	-0.0710628	0.576956	0.0292927	0.490557	0.0361984	0.201688	-0.0669833	0.00105928	-0.17071	1.03802e-06	0.252371	0.69775	0.0203955	0.036887	-0.109287	0.00609692	-0.1433	0.481068	-0.036994	3.57512e-05	-0.214561
LUAD	NPR1	0.0592357	0.0840886	0.770744	0.0130118	0.0119151	0.111937	0.000247625	0.162556	0.126549	0.0681461	0.00934683	-0.115672	0.0678519	-0.0814031	7.6665e-06	0.197819	0.0469051	-0.0885609	1.62312e-10	0.27977	1.47894e-08	0.24893	0.000481497	0.154939	0.484262	-0.0312265	0.395744	0.037909	0.00055569	-0.153252	9.46605e-08	-0.234962	2.16289e-09	0.262557	NA	NA	0.0134763	-0.110003	0.0164234	-0.106836	0.00194488	-0.137703	0.538343	-0.0274716
LUSC	NPR1	0.000787356	0.154338	0.444393	-0.0353605	0.149771	-0.0665416	0.101765	-0.0755727	0.475122	-0.0330212	0.0331736	0.0982723	0.74095	-0.0152891	0.0167914	0.110257	0.00292518	-0.136967	4.98452e-05	0.185966	0.0704684	0.0835144	0.0101547	0.118467	0.151199	-0.0663096	0.518313	-0.0298683	0.000934988	-0.152166	0.719834	-0.0165877	6.90349e-06	0.205739	0.134985	0.0690482	0.496231	-0.031462	3.36441e-05	-0.19006	0.217477	-0.0569917	0.00149821	0.146056
PAAD	NPR1	0.249511	-0.0872566	1.0344e-05	0.325621	0.488275	-0.0525795	0.191565	0.098904	0.683717	0.0309216	0.000163047	-0.28047	0.658209	0.033576	0.148773	0.109289	0.52008	-0.0488035	0.76852	0.022341	0.0508095	0.147464	0.0016063	0.23611	0.00230072	-0.228364	0.0297057	-0.163929	0.286008	-0.0808665	0.00436583	0.213892	0.581633	-0.041813	0.138845	0.112014	2.03959e-07	0.379587	0.799742	-0.0192574	0.0304358	0.163213	0.14035	-0.111592
PRAD	NPR1	0.930041	0.00403033	0.499466	-0.0309951	0.130704	0.0692977	0.041827	0.0932287	0.0215766	-0.10519	0.0526176	-0.0887947	0.0080603	-0.121184	0.000886996	0.151717	0.118902	0.0714962	0.000110972	0.176056	0.27242	0.0503516	0.107133	0.0738653	0.547238	-0.0276265	0.75173	0.0145224	1.27291e-05	-0.198377	0.308427	-0.0467323	0.000143883	0.173191	NA	NA	0.401709	-0.0384824	0.000786601	-0.153221	0.642996	0.0212763	0.72581	0.0160989
READ	NPR1	0.365413	0.0727202	0.853172	0.0148886	0.306101	-0.0821977	0.578417	-0.0446845	0.0705155	-0.144736	4.1898e-09	0.447535	0.0146945	0.194411	0.0133933	0.197014	0.752135	-0.0254046	0.176492	0.10842	2.83667e-05	-0.327453	0.3444	0.0759576	0.201822	-0.102416	0.14466	-0.116948	0.0659011	-0.147152	0.166558	-0.110949	0.000805475	-0.264758	NA	NA	0.00129503	-0.254542	0.26111	-0.0902246	0.131055	0.121031	0.826544	0.0176285
STAD	NPR1	0.0617391	0.09722	1.01806e-05	0.227198	0.308463	-0.0530892	0.0872449	0.0890292	0.807127	-0.0127345	0.349286	-0.0487951	0.0733867	-0.0931921	0.0957669	0.0867275	0.0476266	-0.103045	4.8671e-07	0.258005	2.04351e-05	0.219507	0.0792823	-0.0913494	0.846708	-0.0100841	0.0714358	-0.0938284	0.487191	-0.0362308	1.28761e-05	-0.224635	0.314221	0.052462	0.119172	0.0811509	0.781748	-0.0144509	4.38254e-06	-0.236159	0.911439	0.00580185	0.098216	0.0860964
THCA	NPR1	0.0359951	0.0942807	0.240403	-0.0528632	2.80935e-08	-0.246351	7.2482e-09	-0.256311	0.016419	0.107806	0.181177	-0.0601976	0.229425	0.054116	0.00040094	0.158481	0.317986	0.044975	0.00147379	0.142551	0.204582	0.0571174	0.00592544	-0.123526	0.00153573	0.142021	0.00766646	0.119718	0.723958	-0.0159132	0.000380517	-0.15909	0.353381	0.0418003	NA	NA	0.0145804	0.109734	0.707583	-0.0169012	0.420032	-0.0363233	1.22748e-06	-0.21601
UCEC	NPR1	0.000254923	0.158829	0.798838	0.0111382	0.0210269	0.100596	0.0102585	-0.111841	0.349592	-0.0408647	0.532601	-0.0272693	0.000340332	0.155622	0.0127587	0.108525	0.0466848	-0.0867738	0.0153702	0.105627	0.934081	-0.00361497	0.821832	0.00984191	0.00368116	0.126424	0.00113025	-0.141586	0.114268	-0.0689426	0.00071359	-0.147109	0.150723	0.0627429	NA	NA	0.00744191	-0.116576	0.0464658	-0.0868602	0.0350474	0.0919289	0.0090031	-0.113786
BLCA	NT5C3A	0.24792	-0.0581229	0.0524352	-0.0974184	0.00133097	0.160526	0.678911	0.020839	0.827216	0.0109891	0.20563	-0.0636586	0.15233	0.0719711	0.00361007	-0.145746	0.399837	0.042369	0.0617559	-0.0938434	0.954142	0.00289525	0.516797	0.032631	0.963151	-0.00232601	2.23962e-05	0.211041	0.217787	-0.06199	0.00279182	0.149678	0.707054	0.0189196	0.0130023	-0.124561	0.00543226	0.139293	0.0382631	0.104038	0.0765513	-0.088991	0.0127062	-0.124968
BRCA	NT5C3A	0.014593	-0.0818445	0.0175874	0.0795687	0.0175541	0.0795921	0.0775837	-0.0591903	0.00762114	0.0893918	0.0323964	-0.0717241	1.62192e-11	0.223267	0.885192	0.00484678	0.0870621	0.0573897	0.000576653	-0.115166	0.161972	-0.0469169	0.181529	0.0448254	7.01476e-07	-0.165378	0.010052	0.0862423	0.00268439	-0.100505	3.9868e-09	0.195623	0.000961378	0.110486	0.622305	0.0165336	0.34594	-0.031629	4.5305e-05	0.136269	2.17552e-05	0.141808	0.000578805	-0.115133
CESC	NT5C3A	0.555827	-0.0377354	0.701996	-0.0245166	0.542566	0.0390083	0.272161	-0.0702836	0.54477	0.0387957	0.153213	-0.0913382	2.55486e-05	0.26495	0.723051	0.0227074	0.314377	0.0644068	0.0748649	-0.113781	0.268646	-0.0708	0.546247	0.0386534	0.960619	-0.00316423	0.178344	0.0860887	0.00105586	-0.207597	0.000187825	0.235956	0.0619439	-0.119199	NA	NA	0.0400025	0.131043	0.996979	-0.000242656	0.262697	0.0716844	9.11099e-05	-0.246876
CHOL	NT5C3A	0.968826	-0.00685481	0.802667	0.0438111	0.213971	0.215404	0.952132	-0.0105291	0.260859	0.195308	0.793862	0.0458079	0.122128	-0.266232	0.561041	0.101695	0.721896	0.0623689	0.762633	0.0529384	0.588178	0.0947617	0.86659	-0.0294595	0.670195	0.0745955	0.0623056	-0.3184	0.767114	-0.0519104	0.00551786	-0.459241	0.257492	0.196666	0.560249	-0.1019	0.0674554	-0.312649	0.905444	0.0208332	0.848587	0.0334784	0.906512	0.0205969
COAD	NT5C3A	0.923531	0.0046155	0.00982776	0.12367	0.0117559	0.120701	0.00267391	-0.143646	0.146761	-0.0696892	0.394454	0.0409302	0.914197	0.00518093	3.99533e-05	-0.195609	NA	NA	0.838232	-0.00981653	0.85845	0.00857562	0.00905861	-0.125001	0.163965	-0.0668523	0.00437357	0.136395	0.0297091	-0.104249	0.0858591	0.0824523	0.308081	0.0489812	0.0834628	0.0830876	0.39784	-0.0406381	0.778125	0.0135479	0.0179962	0.113387	0.040027	-0.0985002
ESCA	NT5C3A	0.988883	0.0015827	0.635267	-0.0538402	0.0308617	0.241582	0.0536942	-0.216543	0.0375178	-0.233016	0.0953064	0.187786	0.0522678	0.217817	0.230248	-0.135647	0.891548	-0.0154868	0.0616346	-0.20992	0.00224013	-0.336966	0.505949	-0.0754483	0.80243	0.0284152	0.704482	-0.0430625	0.494402	-0.0775027	0.0198561	0.259993	0.531943	-0.0709099	0.203398	-0.143729	0.699374	0.043844	0.9375	-0.0089068	0.270687	0.12463	0.276971	-0.123021
HNSC	NT5C3A	0.000890077	-0.14966	0.15435	0.0644425	0.205879	0.0572453	0.816655	0.0105004	0.685242	0.0183558	0.000591668	-0.154656	4.41763e-17	0.367133	0.232478	0.054038	0.264854	-0.050467	0.344788	0.042769	0.314011	-0.0455772	0.0154986	0.109299	0.225142	0.0548952	0.0560735	0.0863652	0.00497988	-0.12668	0.000107138	0.174108	0.822116	0.0101823	0.823856	0.010081	0.343827	0.0428542	0.819158	0.0103545	0.369106	0.0406613	0.000369285	-0.160243
KIRC	NT5C3A	0.305284	0.0455731	0.000426567	-0.15574	0.227044	-0.0536903	0.00248187	0.133961	0.849169	0.00845848	0.0333607	-0.0944237	0.00111005	0.144283	0.0332304	0.0944932	0.471928	-0.0319864	0.32239	-0.0439917	0.0636731	-0.0823415	0.453668	0.0333183	0.0956404	-0.074014	0.000466758	-0.154695	0.809246	0.0107365	0.0283056	0.0973084	0.428838	-0.0351788	NA	NA	0.0424951	0.0900452	0.402358	0.0372332	4.99292e-08	0.23895	0.0226902	-0.101087
LIHC	NT5C3A	0.305464	0.0537854	0.327526	-0.0513913	0.401943	0.0440007	0.575479	0.0294063	0.015311	0.126849	2.99909e-07	0.264299	0.00692945	-0.141112	0.0303883	-0.113344	0.778152	0.0147963	0.00889791	-0.13675	0.0746741	-0.0934146	0.173283	0.0714302	0.126938	-0.080036	0.696888	0.0204567	0.685717	-0.0212521	0.0722762	0.0941927	0.880883	0.00787036	0.442798	0.0402935	0.0210631	-0.120718	0.0049874	0.146677	0.238338	-0.0618727	0.0142284	0.128224
LUAD	NT5C3A	0.00508448	-0.124617	0.153538	0.0636636	0.879772	-0.00675428	0.132298	-0.0671336	0.262159	0.0500397	0.457663	0.0331558	1.46359e-06	0.212599	0.458152	-0.0331197	0.674719	-0.018739	0.190495	-0.0584079	0.0611831	-0.0834548	0.482823	0.0313294	0.0397359	0.0916378	0.441552	0.0343548	0.267159	-0.0495194	0.00341123	0.130192	0.0178531	-0.105475	NA	NA	0.473831	0.031976	0.297252	0.0465201	0.354924	0.0412913	0.221806	0.0545155
LUSC	NT5C3A	0.0768371	-0.0816947	0.427221	0.0367078	0.765312	0.0138055	0.201044	0.0590825	0.108974	0.0740283	0.0603127	-0.0867164	0.00271228	0.13802	0.12612	0.0706543	0.406635	0.0383652	0.135	-0.0690457	0.534331	0.0287341	0.871591	0.00747559	0.375004	-0.0410126	0.124182	0.071017	0.0641054	-0.0854721	0.0012404	0.148531	0.142683	-0.0677183	0.867157	-0.00773614	0.216484	0.0571149	0.826345	-0.0101466	0.889714	0.00641319	0.024767	-0.103552
PAAD	NT5C3A	0.27113	-0.0834003	0.951934	0.00457625	0.247034	0.0877128	0.839429	-0.0153821	0.0296379	0.163996	0.0213105	-0.173471	0.0871914	0.129306	0.980974	-0.00181049	0.322985	0.0749283	0.0175298	0.178881	0.830264	0.0162731	0.963107	0.00351161	0.112316	0.120112	0.380288	-0.0665347	0.384336	-0.0659724	0.300317	-0.0785118	0.000585185	0.256652	0.860094	0.0133805	0.517321	-0.0491263	0.752249	0.0239623	0.813576	0.0179014	0.0302449	-0.163399
PRAD	NT5C3A	0.616892	0.0229626	0.110082	0.0732532	0.694677	-0.0180179	0.252748	0.052468	0.255663	-0.0521474	0.345145	-0.0433184	8.98249e-06	0.201743	1.58814e-05	0.196211	0.135324	-0.068479	0.692208	-0.0181714	0.198132	-0.0590262	0.386882	0.0397072	0.010259	-0.117435	0.678461	0.0190298	6.14223e-05	-0.182418	0.0188289	0.107519	0.0144938	0.111881	NA	NA	0.000371573	-0.162322	0.934055	0.00379854	0.73493	0.0155421	0.824303	-0.0101918
READ	NT5C3A	0.0143903	0.195001	0.132131	0.120697	0.0281987	0.175184	0.390411	-0.0690152	0.181327	-0.107228	0.00110375	0.258026	0.313758	0.0809114	0.136968	-0.119219	0.116709	-0.125706	0.0688477	0.145594	0.000677937	-0.26837	0.00659611	-0.215967	0.444597	-0.0614433	0.0577972	-0.15175	0.841289	0.016109	0.321722	0.0795949	0.87321	-0.0128381	NA	NA	0.000630661	-0.269869	0.249339	0.092478	0.160649	0.112506	0.00410313	-0.22786
STAD	NT5C3A	0.778382	-0.0146797	0.366576	-0.047073	0.00858409	0.136455	0.176172	-0.0704712	0.527446	0.032954	0.7944	0.0135934	0.0428015	0.105371	0.408928	-0.0430561	0.484821	0.0364281	0.152229	-0.0745794	1.07076e-06	-0.2504	0.0309292	0.112213	0.0341521	-0.110161	0.0334164	0.110615	0.886866	0.00742132	0.00178922	0.161841	0.0957486	0.0867323	0.446185	0.0397224	0.0222537	-0.118825	0.0459463	0.103832	0.8581	-0.00932641	0.0160683	-0.125084
THCA	NT5C3A	0.0185982	-0.105752	0.0321389	0.0963257	0.739391	-0.014989	0.0490617	-0.0885076	0.377388	-0.0397601	0.74409	-0.0147089	0.732726	0.0153874	0.00564599	0.124229	0.590921	0.0242166	0.0874977	0.0768832	0.200797	-0.0575975	0.200365	-0.0576526	0.775692	-0.0128389	0.141267	0.0662154	0.0462062	-0.0896475	0.00525252	-0.125274	0.313253	0.0454166	NA	NA	0.812982	0.0106602	0.335172	-0.0434066	0.725965	-0.0157927	0.453929	-0.0337354
UCEC	NT5C3A	0.803241	0.0108892	0.738579	0.0145855	0.000191199	0.161962	0.130247	-0.0660607	0.0698079	0.0791216	0.00452649	-0.123602	0.00801398	0.115498	5.81151e-05	0.174365	0.450861	-0.0329445	0.371559	0.0390389	0.0589198	-0.0824111	0.16649	0.0604152	0.210291	-0.0547125	0.655196	-0.0195153	0.429064	0.0345522	0.0228968	0.0991926	0.073405	0.0781275	NA	NA	0.000985349	-0.143254	1.61814e-06	0.207335	8.3523e-08	0.231059	1.49501e-22	-0.40831
BLCA	NUDT5	0.450858	-0.0379474	0.106058	-0.0812351	0.371676	0.0449545	0.910932	-0.00563198	0.0646387	-0.0928282	0.0645462	0.0928602	0.196521	0.0649563	0.696803	0.0196154	0.0539891	0.0967876	0.000751497	-0.16846	0.236582	-0.0595368	0.810664	0.0120612	0.297355	-0.052432	0.00245739	0.151597	0.119125	-0.0783435	0.0021575	0.153531	0.446338	-0.0383271	0.223534	-0.0612245	0.0982337	0.0831041	0.0533013	0.0970649	0.805258	-0.0124126	0.00400707	-0.144123
BRCA	NUDT5	0.142359	-0.0492154	0.574405	-0.0188489	0.004664	0.0947603	0.114997	-0.0528691	0.388783	0.0289231	0.110234	0.0535732	5.73834e-08	0.180661	0.658432	-0.0148386	0.00643614	0.0912695	1.43292e-15	-0.263215	0.0623116	-0.0625106	0.430728	0.0264446	6.75893e-05	-0.133157	0.34444	0.0317275	0.0410811	-0.0684877	9.19333e-08	0.177884	0.543964	0.0203675	0.930699	0.00291917	0.0798005	-0.0587538	9.30372e-09	0.190998	0.212562	0.041825	0.127581	-0.0511134
CESC	NUDT5	0.22098	-0.0783136	0.00980205	0.164385	0.539575	-0.0392976	0.157994	0.0902923	0.235914	0.0758469	0.0427658	-0.129288	0.510818	0.0421207	0.580717	0.035385	0.540876	0.0391717	0.755317	0.0199689	0.822892	0.014343	0.908749	0.007345	0.943258	-0.00456116	0.770524	0.0186911	0.225625	-0.0775341	0.106177	0.103258	0.801244	0.0161313	NA	NA	0.592614	0.0342782	0.646566	0.0293787	0.29259	-0.0673691	0.0793142	-0.112092
CHOL	NUDT5	0.355317	-0.161066	0.274753	0.189822	0.0794688	-0.300462	0.697906	0.0680026	0.11437	-0.271694	0.165304	0.239793	0.393311	0.14889	0.997452	-0.000560224	0.698414	-0.0678829	0.830081	-0.0376274	0.646815	-0.0802374	0.123468	0.265316	0.441233	0.134463	0.373579	-0.155122	0.0493919	-0.334683	0.772507	-0.0506754	0.561096	-0.101681	0.202542	-0.220752	0.520596	-0.112325	0.0113844	0.422842	0.258565	0.196232	0.556654	0.10283
COAD	NUDT5	0.936812	0.00381203	0.0599478	0.0902711	0.0399657	0.0985305	0.00300777	-0.141942	0.0598185	-0.0903166	0.376926	0.0424672	0.697714	0.0186749	0.0421729	-0.0974662	NA	NA	0.235493	-0.0569978	0.181288	0.0642133	0.0223877	-0.109482	0.0256132	-0.107018	0.0651903	0.0884918	0.172049	-0.065596	0.0173772	0.114003	0.713957	0.017624	0.184442	0.0637531	0.361999	-0.0438111	0.211693	0.06	0.0153108	0.116207	0.151679	-0.0688537
ESCA	NUDT5	0.847246	-0.0218788	0.81473	-0.0266129	0.0609273	0.210481	0.998267	-0.000246662	0.624973	0.0554822	0.910519	0.0127654	0.173233	-0.153777	0.651624	-0.0512535	0.700178	0.0437208	0.767007	-0.0336466	0.389976	0.0974173	0.76602	0.0337933	0.520186	0.0729484	0.386666	-0.098096	0.0519943	0.218064	0.544795	0.068707	0.254636	-0.128858	0.621552	0.0560304	0.613281	-0.0573612	0.29735	0.117963	0.95305	-0.00668777	0.76357	-0.0341577
HNSC	NUDT5	0.0365754	-0.0944679	0.900244	0.00567732	0.162579	0.0631835	0.418468	-0.0366319	0.463827	0.0331693	0.014041	-0.110901	0.578664	0.0251479	0.670327	-0.0192786	0.885789	-0.00650532	0.568026	-0.0258551	0.407661	0.0374886	0.681309	0.0185984	0.891692	-0.00616696	0.88679	-0.00644788	0.738395	0.0151254	0.00232793	0.137252	0.0373059	-0.0941048	0.324349	0.0446149	0.219343	0.055587	0.000648153	0.153554	0.810681	-0.0108491	0.729293	0.0156727
KIRC	NUDT5	0.985709	-0.000796666	0.00565266	-0.122617	0.0196972	-0.103446	0.0269941	0.0981288	0.596272	-0.0235595	0.409073	-0.0367048	0.313461	0.0448101	0.130952	0.0671011	0.308215	-0.045298	0.0296874	-0.0964786	0.135143	0.0663814	0.00257693	0.133462	0.614625	-0.0223908	0.000128667	-0.169076	0.0176648	0.105233	0.0856185	0.076344	0.00146153	-0.140831	NA	NA	0.0394235	0.0914199	0.00559397	0.122766	0.00164208	0.139346	0.762963	-0.0134134
LIHC	NUDT5	0.339095	-0.0501776	0.575578	0.0293986	0.700024	-0.0202343	0.660884	0.0230382	0.00280202	0.15601	0.0749758	0.0933181	0.0960998	0.0872342	0.115148	0.0826062	0.711564	-0.0194187	0.000142613	0.197797	0.89074	-0.00721481	0.76091	0.0159809	0.479994	0.0370846	0.266241	0.0583427	0.806612	-0.0128569	0.787541	-0.0141544	0.0266898	-0.115998	0.228574	0.0631761	0.00994083	-0.134779	0.606351	0.0270593	0.151528	-0.0752188	0.0321076	-0.112204
LUAD	NUDT5	0.0488508	-0.0877944	0.13491	0.0666848	0.0815688	0.0776551	0.450033	-0.0337205	0.126739	0.068112	0.0176517	-0.105661	0.362831	0.040618	0.40757	0.0369691	0.60093	-0.0233539	0.8699	0.00731364	0.0441692	0.089685	0.948809	0.00286694	0.00682129	0.120371	0.316513	0.0447057	0.496232	0.0303772	0.615717	0.0224106	0.71791	-0.0161305	NA	NA	0.343285	0.0422998	0.00420079	0.127311	0.574031	-0.0250974	0.355771	-0.0412188
LUSC	NUDT5	0.00202665	-0.142016	0.131655	0.0696417	0.721421	0.0164897	0.0910719	0.0780322	0.124781	0.0709044	0.04587	-0.0921451	0.0163558	0.110698	0.22938	0.0555473	0.0528563	-0.0893645	0.42529	0.0368613	0.156853	0.0654072	0.20513	0.0585514	0.780248	0.012903	0.365543	-0.0418309	0.0515484	-0.0898607	0.155039	0.065694	0.905058	-0.00551634	0.228772	-0.0556197	0.208085	0.058172	0.942479	0.00333713	0.818503	0.0106127	0.505474	0.0307904
PAAD	NUDT5	0.439453	-0.0586436	0.656635	0.0337411	0.540742	0.0464139	0.568048	0.0433238	0.258903	0.0855542	0.369327	-0.0680759	0.17457	0.102799	0.106824	0.121972	0.483246	-0.0531883	0.0260507	0.167755	0.639458	-0.0355534	0.0589733	0.142631	0.939289	-0.0057822	0.0685027	-0.137641	0.904903	0.00906983	0.889454	-0.0105521	0.236765	0.0896394	0.911534	-0.00843474	0.919773	-0.00764637	0.531691	0.0474549	0.231233	0.0907016	0.23032	-0.0908787
PRAD	NUDT5	0.297944	-0.0477555	0.561217	0.026669	0.801861	-0.0115196	0.0064765	0.124502	0.195701	-0.059347	0.0254387	0.102319	1.78708e-05	0.195046	0.0934382	-0.076897	0.01039	-0.117235	0.958295	-0.00240062	0.00563476	-0.126574	0.545696	0.0277329	0.0324938	-0.0979268	0.848206	-0.00878684	0.181236	-0.0613184	0.307983	0.0467752	0.507946	0.0303854	NA	NA	0.0821765	-0.079669	0.971516	-0.0016392	0.931182	0.00396445	0.947277	-0.00303567
READ	NUDT5	0.331822	0.0779554	0.229449	0.0964595	0.0141312	0.195512	0.86421	-0.0137579	0.16797	-0.110583	0.165695	0.111174	0.267153	0.0890949	0.0479139	-0.158141	0.77216	-0.0232916	0.462225	0.0590954	0.0194751	-0.186311	0.0511903	-0.15591	0.447595	-0.0610403	0.162793	-0.111936	0.120221	0.124523	0.115502	0.12612	0.903725	0.00973091	NA	NA	0.0275901	-0.175857	0.188346	0.105537	0.267767	0.0889811	0.00574197	-0.219504
STAD	NUDT5	0.0317646	-0.111664	0.679299	0.0215631	0.882844	0.00768701	0.137496	-0.0773569	0.846153	-0.0101211	0.000741986	0.174625	0.216265	0.0644349	0.601999	-0.0272	0.0695194	0.0944674	0.0129386	-0.129108	0.00014886	-0.195935	0.0418565	0.105853	0.00349267	-0.151474	0.00552485	0.143986	0.660829	-0.0228849	0.141799	0.0765231	0.0198233	0.121078	0.584583	0.0285124	0.0153497	-0.125943	0.000879386	0.172226	0.933699	-0.00433958	0.0295552	-0.113144
THCA	NUDT5	0.914883	-0.00481613	0.7803	0.0125682	0.189495	-0.0590712	0.0404292	-0.0921477	0.137468	0.066853	0.468033	-0.0326909	0.385548	-0.039085	0.00769922	0.119654	0.944409	0.00314207	0.416847	0.0365726	0.279822	0.048669	0.633855	0.0214603	0.734586	0.0152761	0.0657075	0.0827877	0.459314	0.0333345	0.0075473	-0.119952	0.258398	-0.0508938	NA	NA	0.514872	0.0293403	0.318361	-0.0449402	0.161023	-0.0630957	0.154078	-0.0641575
UCEC	NUDT5	0.766553	0.0129752	0.376335	-0.0386509	0.000573273	0.149673	0.14469	-0.0636827	0.210579	0.0546779	0.156981	-0.061798	0.041364	0.0889775	3.50993e-07	0.219898	0.0986769	-0.072078	0.0354472	0.0917292	0.253135	-0.0499147	0.914058	0.0047168	0.243392	0.0509522	0.00886401	-0.114017	0.897632	0.00562287	0.0550186	0.0837128	0.487368	-0.0303469	NA	NA	0.0571391	-0.0829961	2.36476e-05	0.183194	0.000850301	0.145027	1.15043e-18	-0.371576
BLCA	PAICS	0.323577	-0.0496689	0.17155	-0.0687554	0.643971	0.0232651	0.263567	0.0562437	0.0524261	0.0974222	0.0143615	0.122788	0.358342	0.0462207	0.00106152	-0.163708	0.00859859	0.131716	0.000191871	-0.186126	0.197679	-0.0647889	0.952338	0.0030093	0.278449	-0.0545263	0.00218686	0.153331	0.0129359	-0.124651	0.0602009	0.0944072	0.894102	-0.00670193	0.824454	0.0111677	0.712505	0.0185511	0.00214222	0.153636	0.499273	0.0340065	2.51982e-05	-0.20975
BRCA	PAICS	5.02905e-06	-0.152292	0.375501	0.0297413	0.109637	0.0536631	0.0325588	-0.0716572	0.0227706	0.0763299	0.175398	0.0454621	0.0122825	0.0839016	0.0161771	0.0805944	0.0151797	0.0813682	0.000515113	-0.116176	0.21189	-0.0418865	0.223827	0.0408147	5.75117e-05	-0.134421	0.0224532	0.0765087	0.865852	0.00567046	0.00171161	0.104982	0.149568	0.0483441	0.377782	0.0295995	1.53358e-07	-0.174819	0.00528214	0.0934244	0.794845	-0.00872816	4.65873e-06	-0.152821
CESC	PAICS	0.535874	-0.0396565	0.0334022	0.135689	0.316274	-0.0641553	0.135999	-0.0953224	0.0538134	0.123105	0.242602	0.0747779	0.545127	0.0387613	0.589628	0.034555	0.00224831	0.193934	0.0153558	-0.154399	0.528598	-0.040366	0.776885	0.0181587	0.588398	-0.0346692	0.129325	0.0969714	0.00799421	-0.16875	0.435556	0.0499364	0.693035	0.0252924	NA	NA	0.147729	-0.0925688	0.909822	-0.0072583	0.790632	-0.0170125	0.000103996	-0.244917
CHOL	PAICS	0.410687	-0.14355	0.679182	0.0724467	0.869265	0.0288635	0.74541	0.056906	0.771339	-0.0509427	0.0341883	0.358989	0.230846	0.207858	0.638132	-0.0823529	0.502808	0.117127	0.0617953	-0.31899	0.150686	-0.24811	0.172424	0.235933	0.283217	-0.186568	0.683249	0.0714779	0.961167	0.00854009	0.684107	-0.0712736	0.685812	0.0708683	0.202542	-0.220752	0.090821	-0.290196	0.286809	0.185206	0.31133	0.176188	0.769888	-0.0512749
COAD	PAICS	0.615154	0.0241701	0.00385595	0.138283	0.0272982	0.105836	0.00105321	-0.156549	0.00775243	-0.12751	0.477543	0.0341427	0.924709	-0.00454419	0.000422421	-0.168319	NA	NA	0.363563	-0.0436687	0.2589	0.0542474	0.0242092	-0.108055	0.152303	-0.0687491	0.00388522	0.13817	0.00092883	-0.158216	0.00367549	0.138995	0.121743	0.0743081	0.233396	0.0572534	0.699134	-0.0185826	0.474719	0.0343619	0.147206	0.0696127	0.0101671	-0.123112
ESCA	PAICS	0.431265	-0.089221	0.746455	0.0367135	0.337993	0.108514	0.889791	0.0157392	0.825294	0.0250704	0.18781	0.148775	0.157511	-0.15953	0.865423	-0.0192491	0.0840791	0.194352	0.0457271	-0.22405	0.172146	0.154162	0.978246	-0.00309735	0.646414	0.0520745	0.252122	0.129537	0.347777	0.106349	0.141695	0.165766	0.128588	0.171344	0.813473	-0.0267968	0.0120597	-0.279453	0.164821	-0.156805	0.67978	-0.0468604	0.13429	-0.168867
HNSC	PAICS	3.57865e-05	-0.185565	0.322477	0.0447876	0.494569	0.0309291	0.000582847	-0.154837	0.17938	0.0607546	0.0931136	0.0759428	0.209567	0.0567834	0.272478	-0.0496706	0.000279417	0.163465	0.000190041	-0.167822	0.396473	0.0383898	0.605625	-0.0233819	0.00422613	-0.129025	0.000810204	0.150824	0.679775	-0.0186932	0.154797	0.0643729	0.000609345	0.154301	0.319578	0.0450565	0.000210142	-0.166695	0.00102947	-0.147843	0.618235	-0.0225681	5.44796e-09	-0.259634
KIRC	PAICS	0.0962141	-0.0738866	0.157439	0.0628173	0.765573	0.0132613	0.28141	0.0478817	0.612827	0.0225046	0.769541	0.0130303	0.000868882	0.147295	0.00302857	0.131296	0.768724	0.0130777	0.795735	0.0115135	0.191792	0.0580073	1.2522e-05	0.192471	0.048848	-0.0874488	0.30726	-0.0453875	0.637019	-0.0209853	0.674637	0.0186697	0.0751174	0.0790346	NA	NA	0.00698551	-0.119549	0.389435	-0.0382651	0.579787	0.0246232	2.25473e-05	-0.186835
LIHC	PAICS	0.620105	0.0260311	0.0442702	0.105356	0.597974	0.0276906	0.799798	-0.0133196	0.014523	0.127841	0.0497801	0.102768	0.252663	0.0600266	0.913898	0.00567885	0.835444	0.0109099	0.000832308	0.174177	0.406997	0.0435305	0.161701	0.0733996	0.36695	0.0473593	0.827456	0.0114478	0.0661537	-0.0962796	0.883172	0.00771802	0.11658	-0.0822833	0.477342	0.0373087	4.32523e-05	-0.212331	0.443595	0.0402232	0.393529	-0.0447916	0.0303546	-0.113367
LUAD	PAICS	1.82777e-09	-0.263714	0.382608	0.038973	0.414609	0.0364174	0.0156497	-0.107615	0.225763	0.0540524	0.0387183	0.0921119	0.00105586	0.145474	0.767448	0.0132044	0.124347	0.0685433	0.000102271	-0.172191	0.325407	-0.0438923	0.569531	-0.0253928	0.0160747	0.107183	0.21012	0.0559188	0.405586	-0.0371257	0.00015831	0.167496	0.0525236	-0.0864148	NA	NA	0.574	0.0250994	0.0108061	0.113452	0.359583	-0.0408935	0.367608	-0.0402157
LUSC	PAICS	0.00194528	-0.14257	0.0159634	0.111105	0.389156	-0.0398121	0.836114	0.0095673	0.00225306	0.140576	0.13388	-0.0692439	0.00300691	0.136581	0.17526	0.0626297	0.660728	0.0202973	0.0903602	-0.0782039	0.482536	0.0324694	0.307943	-0.0471276	0.476929	-0.0328862	0.301113	0.0477972	0.566346	-0.0265168	0.157953	0.0652346	0.770425	-0.0134959	0.920115	0.00463832	0.374377	0.0410665	0.99439	0.000325206	0.541133	-0.0282576	0.00445966	-0.130952
PAAD	PAICS	0.271127	-0.0834007	0.857269	-0.0136535	0.786513	0.0205598	0.867429	-0.0126722	0.00723566	0.201801	0.672016	0.0321344	0.0520364	0.146699	0.224029	0.0921121	0.284656	0.0810931	0.410357	0.0624403	0.24476	-0.0881346	0.185576	0.100247	0.499403	-0.0512441	0.837019	0.0156162	0.401489	0.0636286	0.991409	0.000817464	0.266658	0.0841801	0.491699	-0.0521669	0.0075798	-0.200655	0.356635	0.069896	0.259812	-0.0853917	0.0138208	-0.185282
PRAD	PAICS	0.00263848	-0.137388	0.00112559	0.148692	0.19821	-0.059016	0.153835	0.065399	0.203986	0.0582655	0.680866	0.0188792	2.30523e-06	0.214369	0.522167	0.0293748	0.0392218	-0.0944424	0.212457	0.0571921	0.902927	-0.00559905	0.34277	0.0435319	0.0213768	-0.105351	0.306184	-0.0469493	0.351145	-0.042783	0.371646	0.0409961	0.237444	0.054195	NA	NA	0.000694386	-0.154769	0.559168	-0.0268086	0.74653	0.0148373	0.000787999	-0.153199
READ	PAICS	0.542434	0.0489765	0.137443	0.119076	0.0133603	0.197082	0.466558	-0.0585258	0.108493	-0.128588	0.155736	0.113834	0.603557	0.0417596	0.00183086	-0.246827	0.744919	-0.0261702	0.425778	0.0640089	0.0578007	-0.151748	0.0507982	-0.156171	0.504227	-0.0536911	0.47199	-0.057816	0.606058	0.0414717	0.0449026	0.160306	0.493442	0.055055	NA	NA	0.0174869	-0.189443	0.474768	0.0574547	0.791828	-0.0212318	0.000371315	-0.280606
STAD	PAICS	0.00131436	-0.166424	0.718168	0.0188247	0.343858	-0.0493468	0.0411359	-0.106226	0.0809436	0.0908503	6.9976e-06	0.231228	0.0337428	0.110412	0.364238	-0.0473029	0.000906302	0.171797	3.32031e-09	-0.301345	1.94156e-08	-0.286833	0.0148995	0.126499	0.000446452	-0.181622	5.86494e-08	0.277312	0.0905311	-0.0881211	1.12645e-07	0.271517	0.854173	-0.00958735	0.591024	-0.028025	0.205616	-0.0659527	4.02164e-07	0.25981	0.854743	0.00954945	4.47386e-06	-0.235944
THCA	PAICS	0.512173	-0.0295288	0.014236	0.110119	0.27598	0.0490592	3.06253e-05	-0.186202	6.73271e-07	0.221125	0.283829	-0.0482658	0.409839	-0.0371251	0.0466169	0.08948	0.0369405	0.0938079	0.277513	0.0489031	0.0124402	0.112268	0.0748349	-0.0801451	0.146277	0.0653943	0.083765	0.0778027	0.21219	-0.0561717	0.00051212	-0.155601	0.331315	0.043754	NA	NA	0.116978	-0.0705482	0.484461	-0.0314961	0.642743	-0.0208998	4.33023e-05	-0.182705
UCEC	PAICS	0.170419	-0.0598611	0.0207677	0.100799	0.000282785	0.157685	0.101968	-0.071385	0.11766	0.0683057	0.522322	-0.0279563	0.0103251	0.111744	0.000939031	0.143835	0.440438	0.0337076	0.476167	-0.0311322	0.0158349	-0.105157	0.40655	-0.0362632	0.984056	0.000873407	0.0520893	-0.0847417	0.0677635	-0.0797054	0.000265464	0.158383	0.797054	-0.0112391	NA	NA	0.038884	-0.0900874	3.64269e-12	0.296898	0.00057012	0.149737	2.42054e-25	-0.432127
BLCA	PDE2A	0.436855	0.0391308	0.0028634	0.149295	0.00277319	-0.14978	0.029594	-0.109202	0.245636	-0.0584041	0.867243	0.008416	0.711445	0.0186226	0.000803701	0.167546	0.520011	0.0323814	0.00012107	0.191734	0.11074	0.0801684	0.219657	0.0617393	0.0226788	-0.114355	0.269657	-0.0555332	0.0149103	-0.122114	0.650749	-0.0227904	0.00337583	0.146781	0.098193	-0.0831141	0.0408486	-0.102691	1.77282e-05	-0.213579	0.190082	0.0659001	0.184392	-0.0667541
BRCA	PDE2A	0.693405	0.0132329	1.72453e-05	0.14352	3.28565e-06	-0.155211	1.89317e-05	0.142835	0.170375	-0.0459964	2.29862e-11	-0.221623	0.0787121	0.0589668	0.431721	-0.0263877	0.0895595	-0.0569418	1.78812e-15	0.262344	0.0139112	0.0824197	0.000615445	-0.114579	0.0448127	-0.0672733	0.144598	-0.0489413	0.440969	-0.0258612	0.00216046	-0.102687	4.46113e-17	0.276455	0.218503	-0.0412875	8.88314e-05	0.130991	1.69976e-11	-0.223047	0.000211413	0.123886	2.5023e-06	-0.157051
CESC	PDE2A	0.891264	-0.00876046	0.0643809	-0.11811	0.662669	-0.02795	0.00995372	-0.164052	0.709862	-0.0238385	0.00235355	0.193078	0.880194	0.00965875	0.184106	0.0849635	0.0671336	0.116921	0.854752	0.0117307	0.00015593	-0.238814	0.0888985	0.108699	0.769681	0.0187617	0.945479	-0.0043824	0.0446258	-0.12816	0.125189	-0.0980266	0.233473	0.0762424	NA	NA	0.0483366	-0.126023	0.00169868	-0.199104	0.0254533	0.142462	0.148941	-0.0922938
CHOL	PDE2A	0.374044	0.154973	0.653467	0.0786243	0.767097	-0.0519143	0.357108	0.160475	0.771339	-0.0509427	0.11746	-0.269487	0.962422	-0.00826388	0.773623	0.0504202	0.600804	0.0915843	0.943841	0.0123552	0.691893	-0.0694253	0.432338	-0.137072	0.0278912	-0.371735	0.620494	-0.086686	0.0841433	0.296106	0.387941	0.150568	0.429824	0.137815	0.169077	0.237732	0.481587	0.122969	0.73293	-0.0597986	0.0442332	0.342153	0.101261	-0.281591
COAD	PDE2A	0.194612	0.0623079	0.606503	0.0247632	0.0282299	-0.105209	0.0243433	-0.107954	0.0306129	-0.103682	7.45646e-12	0.320582	0.174507	0.0652229	0.248364	0.0554629	NA	NA	0.39415	0.0409565	0.00678985	-0.129615	0.539027	-0.0295312	0.012513	-0.119652	0.84002	0.00970655	0.0278411	-0.105468	0.00129348	-0.153787	0.00737736	-0.128301	0.390323	0.0412886	0.00194524	-0.148166	0.0755592	-0.0852934	0.97832	-0.00130672	0.218777	0.0590822
ESCA	PDE2A	0.913842	-0.0122894	0.289864	0.119793	0.152885	-0.161303	0.151703	0.161763	0.810885	-0.0271756	0.0236194	-0.252892	0.017837	0.264292	0.26676	0.125648	0.00399418	-0.318429	0.000160333	0.409761	0.954391	0.00649657	0.328912	0.11056	0.996879	0.000444368	0.0669053	-0.205898	0.324266	-0.11162	0.120965	-0.174791	0.45572	0.0845772	0.311871	-0.114497	0.581327	0.062578	0.843915	-0.022362	0.0935923	0.188747	0.137127	0.167664
HNSC	PDE2A	0.127964	-0.0688593	0.746557	0.0146365	0.0266157	-0.100163	0.24198	-0.0529557	7.76701e-05	-0.177543	0.00709056	0.121497	0.413515	0.0370228	1.20053e-05	0.196329	0.0353816	-0.0950748	0.0104775	0.115541	0.873164	-0.0072302	0.19695	0.0583887	0.0045861	-0.127862	0.352403	0.0420992	0.00138952	-0.144032	0.0480016	-0.0893772	5.711e-07	0.223615	0.627478	-0.0219762	9.24052e-05	-0.175696	2.97425e-10	-0.279627	0.943442	-0.00321315	0.110986	-0.0720898
KIRC	PDE2A	0.00653828	-0.120515	3.67054e-06	0.203732	0.234498	-0.05284	7.17891e-05	0.17522	5.943e-05	-0.177165	1.07156e-12	-0.308942	3.58508e-06	0.203942	0.00192352	0.137306	0.48561	0.031007	3.10657e-15	0.340253	1.11186e-06	0.21412	0.480785	-0.0313507	0.498997	-0.030063	8.22456e-10	0.268099	0.00114909	-0.143853	2.00138e-05	-0.187991	1.03817e-05	0.194233	NA	NA	0.169571	-0.0610364	3.01865e-10	-0.274704	0.11531	-0.0699557	2.14664e-18	-0.374866
LIHC	PDE2A	0.0690563	-0.0952714	0.187645	0.0691198	0.666384	-0.0226404	0.315896	0.0526398	0.452291	-0.0394606	2.29973e-14	-0.385303	0.111005	0.0835584	1.92488e-06	0.246208	0.0496427	0.10283	0.000193506	0.193908	0.000172667	0.195369	0.179574	-0.0704013	0.948527	0.00339067	0.314341	0.0528089	0.369369	-0.047121	0.00023732	-0.191265	1.12175e-08	0.293343	0.232263	0.062679	0.0620146	-0.0977821	1.80955e-05	-0.222349	0.594846	0.0279274	9.69017e-13	-0.361958
LUAD	PDE2A	0.126019	0.0682412	0.663451	-0.0194297	0.448246	-0.0338536	0.0672694	0.0815755	0.051781	0.0866871	0.949082	0.0028516	0.687626	-0.0179532	0.000187782	0.165627	0.220752	-0.0546399	0.00323509	0.130917	0.00717426	0.119628	0.00175773	0.139017	0.323969	-0.0440229	0.0722386	0.0801421	0.15409	-0.0635786	0.303411	-0.0459316	0.0142491	0.109118	NA	NA	0.2352	-0.0529707	0.000215508	-0.164105	0.404227	-0.0372331	0.64234	-0.0207366
LUSC	PDE2A	0.00230639	0.140256	0.0563431	-0.08809	0.0525557	-0.0894777	0.977132	0.00132574	0.486777	-0.0321558	0.0530703	0.0892843	0.926735	-0.00425282	0.0042846	0.131534	0.00820747	-0.121802	0.0266611	0.102241	0.318126	0.0461473	0.0139062	0.113392	0.271002	-0.0508767	0.518578	0.0298493	0.000240514	-0.168619	0.443556	0.0354255	0.00271838	0.137989	0.0552324	0.0884887	0.541386	-0.0282399	1.41602e-06	-0.220304	0.296714	-0.0482338	0.0544091	0.0887886
PAAD	PDE2A	0.0420197	-0.153452	4.63619e-05	0.301985	0.471672	-0.0546026	0.458301	0.0562603	0.788865	-0.0203278	5.75494e-05	-0.298407	0.850732	0.014286	0.0946512	0.126378	0.947611	0.00498838	0.169832	0.103935	0.00970889	0.194451	0.0482037	0.149143	0.0088741	-0.196724	0.0847908	-0.130291	0.302469	-0.0781642	0.000682149	0.25364	0.260602	0.0852507	0.405427	0.0630991	8.8261e-06	0.328009	0.384396	-0.0659641	0.133875	0.113434	0.00384173	-0.216854
PRAD	PDE2A	0.858832	-0.00816497	0.163548	0.0638944	0.424814	0.0366262	0.0732928	0.0820813	0.180798	-0.0613799	0.0271043	-0.101195	0.0606934	-0.0859499	0.706835	0.0172649	0.402006	0.0384581	2.36198e-06	0.21415	0.974592	0.00146212	0.0566855	0.0873197	0.262742	-0.0513791	0.749666	0.0146473	0.00444293	-0.130045	0.0990835	-0.0756071	6.96225e-09	0.261256	NA	NA	0.519628	-0.0295541	0.00327146	-0.134401	0.295681	0.0479795	0.00297645	-0.135721
READ	PDE2A	0.0775821	0.141275	0.59331	0.042945	0.901663	-0.00994043	0.733531	-0.0273831	0.328781	-0.0784456	3.15014e-06	0.362159	0.104205	0.130161	0.0304505	0.1728	0.694548	-0.0315847	0.088249	0.136504	0.0073806	-0.213062	0.707482	0.0301818	0.119078	-0.124905	0.272477	-0.0881138	0.148	-0.115991	0.133456	-0.120288	0.0675158	-0.146291	NA	NA	0.00169391	-0.24858	0.178966	-0.107807	0.394577	0.0684119	0.622243	0.0396208
STAD	PDE2A	0.0174162	0.12356	3.04447e-08	0.283002	0.987388	0.000824606	0.043107	0.105218	0.723531	0.0184511	0.000579564	-0.17806	0.00146817	-0.164793	0.0569475	0.099061	0.00274413	-0.155284	6.5666e-12	0.347008	1.8074e-07	0.267233	0.0450513	-0.104261	0.81647	-0.0121062	0.0462087	-0.103708	0.394277	-0.0444159	1.32595e-09	-0.308581	0.00216314	0.158962	0.143088	0.0762771	0.59219	-0.027937	2.71852e-09	-0.302938	0.83431	0.0109112	0.120779	0.0808006
THCA	PDE2A	0.858297	0.0080451	0.960494	-0.00223203	9.83436e-09	-0.254105	1.85026e-08	-0.249467	0.0630758	0.0836055	0.0636883	-0.0834127	0.393824	0.0384091	5.08404e-07	0.223476	0.211811	0.0562181	0.00747272	0.120101	0.135523	0.0671847	0.148534	-0.0650315	0.0535016	0.0868408	0.00109146	0.146367	0.788199	-0.0121051	4.51644e-05	-0.182275	0.117735	0.0704032	NA	NA	0.0758389	0.0798708	0.0732719	-0.0805782	0.727551	-0.0156975	9.06036e-10	-0.270828
UCEC	PDE2A	0.934827	0.00357396	0.161838	0.0610841	0.989035	0.000600647	0.805718	-0.0107494	0.565899	-0.0250878	0.00105994	-0.142369	0.0292311	0.0950788	0.0956379	0.0727344	2.23235e-06	-0.204589	3.08627e-11	0.284301	0.789267	0.0116806	0.302522	-0.0450398	0.37284	0.0389346	0.0194163	-0.101894	0.0727492	0.0783057	0.0970657	-0.072424	0.139934	0.0644446	NA	NA	0.735827	0.0147449	0.245932	-0.050679	0.0323643	0.0933216	0.223032	-0.0532183
BLCA	PDE3A	0.764856	-0.0150586	0.223875	0.0611795	6.35468e-06	-0.224375	0.462716	-0.0369615	0.1771	-0.0678772	0.000538103	0.172939	0.00432278	0.142932	6.71451e-05	0.198689	0.382167	0.0439778	0.000513635	0.173555	0.122466	-0.0776442	0.151751	0.0720726	0.0142693	-0.122904	0.836504	-0.0103898	0.42841	-0.039855	0.819345	0.0114983	0.0734434	0.0899422	0.031711	-0.107832	0.000426674	-0.175988	3.32601e-09	-0.291304	0.13565	0.0750218	0.0909699	-0.0849484
BRCA	PDE3A	6.94014e-05	-0.132948	0.00458846	0.0949344	0.0151262	-0.081411	0.132917	0.0504093	0.0084376	-0.0882449	0.625042	0.0164038	0.794462	0.00874482	0.122111	0.0518592	0.586113	0.0182751	3.4461e-09	0.196407	0.172089	-0.0458128	0.997479	-0.000106041	3.49442e-07	-0.16977	0.163791	0.0467146	0.00113632	-0.108916	0.0500717	-0.0656989	9.20938e-10	0.203366	0.140144	-0.0494899	3.45311e-05	-0.138344	7.91409e-11	-0.215688	0.124229	0.0515674	1.64e-16	-0.271572
CESC	PDE3A	0.506359	0.0425657	0.213283	0.0796315	0.0177911	-0.151003	0.355937	-0.0591065	0.246087	-0.074229	0.150379	0.0919699	0.759217	-0.0196404	0.0267556	-0.141238	0.79273	0.016838	0.191013	0.0836486	0.186461	-0.0845112	0.24983	0.0736454	0.252685	-0.0732043	0.14407	-0.0934094	0.308027	0.0652558	0.0347998	-0.134644	0.000412561	0.22347	NA	NA	0.0753172	-0.113606	0.123484	-0.0984696	0.0879508	0.109021	0.00629255	-0.173753
CHOL	PDE3A	0.114866	-0.271336	0.468179	0.126729	0.141739	0.253494	0.0479921	-0.336646	0.560249	-0.1019	0.111388	0.273867	0.669903	-0.0746655	0.331178	-0.169211	0.130652	0.260523	0.392102	-0.149267	0.111927	-0.273471	0.520821	0.112265	0.377233	-0.153954	0.158016	0.24387	0.987608	-0.00272438	0.794876	-0.0455778	0.567022	0.100154	0.260859	-0.195308	0.395984	-0.14806	0.629791	-0.0843959	0.753109	0.0551291	0.634552	0.0832282
COAD	PDE3A	0.780019	0.0134292	0.0340552	0.101647	0.738439	0.0160555	0.199049	-0.0616947	0.813526	0.0113419	1.85418e-07	0.246796	0.848987	-0.00915569	0.192581	0.062592	NA	NA	0.585151	0.0262438	0.0669571	-0.0879187	0.266401	-0.0534026	0.000776411	-0.160566	0.868254	0.00797602	0.19981	-0.0615905	0.399653	0.0404823	0.88511	-0.00694791	0.354472	0.044502	3.4345e-07	-0.241493	0.0409774	-0.0980367	0.342909	0.0455814	0.141498	-0.0706075
ESCA	PDE3A	0.211031	-0.141358	0.371972	0.101152	0.567287	-0.0649114	0.675352	0.0475467	0.188381	-0.148585	0.631958	-0.0543667	0.342967	0.107409	0.322983	0.111914	0.123635	-0.173565	0.0321041	0.239872	0.707716	0.0425689	0.0815573	-0.195922	0.429459	-0.0895697	0.592458	-0.0607467	0.00158606	-0.34752	0.876987	-0.0175814	0.0169633	0.266283	0.478405	0.080391	0.178988	-0.151767	0.023331	-0.253401	0.309691	-0.11501	0.65179	0.0512274
HNSC	PDE3A	0.00300691	-0.133775	0.25793	0.051204	0.0176299	-0.10718	0.00673907	-0.122254	0.0258013	-0.100706	1.29087e-13	0.326253	0.000385175	-0.159751	0.0299107	0.0981019	0.433559	0.035457	0.436485	0.035232	0.165134	-0.0628024	0.822797	0.0101426	1.91999e-07	-0.232585	0.498737	0.0306312	0.0246051	-0.101531	2.6386e-08	-0.248045	4.78148e-13	0.318925	0.52253	0.0289553	3.52132e-14	-0.333332	4.12859e-11	-0.292339	0.23668	-0.0535557	0.107779	-0.0727431
KIRC	PDE3A	0.0493116	-0.0872707	1.64418e-07	0.229745	0.03385	-0.0941647	0.0482405	0.0876844	0.00201831	-0.13668	0.675529	-0.0186154	0.000877045	0.147181	0.000288804	0.160194	0.157276	0.0628419	0.000180287	0.165425	0.388036	0.038378	0.403392	0.0371515	4.82773e-07	-0.22108	0.0133322	0.109739	0.354847	-0.0411343	0.963086	0.00205849	2.12367e-06	0.208557	NA	NA	0.00779936	-0.117925	3.14851e-10	-0.27443	0.953819	-0.00257574	1.991e-06	-0.209118
LIHC	PDE3A	0.487021	0.0364939	0.61081	0.0267249	0.620047	0.0260354	0.0660489	0.0963167	0.146818	0.0760925	0.306269	0.0536961	0.396256	-0.0445342	0.541377	-0.032069	0.0185282	0.123213	0.222959	0.0639436	0.624617	0.0256959	0.971969	-0.0018456	0.146284	-0.076193	0.465379	0.0383284	0.609568	-0.0268179	0.839814	-0.0106161	0.00439985	0.14875	0.582699	0.0288523	6.04598e-05	-0.208352	0.0105123	-0.133775	0.0926468	-0.0881498	0.0242955	-0.11789
LUAD	PDE3A	0.020697	-0.103031	0.404303	-0.0372271	0.688522	-0.0178988	0.000153616	-0.167823	0.243817	0.0520095	0.048791	0.0878176	0.000344376	-0.158821	0.644877	-0.0205786	0.783793	-0.0122518	0.293421	-0.0468902	0.18494	-0.0591464	8.51516e-09	0.252925	0.041555	0.0908153	0.226109	0.0540122	8.29207e-07	0.217435	0.657478	-0.0197977	0.557224	0.0262063	NA	NA	0.405131	-0.0371617	0.0712726	-0.0804143	7.99854e-05	-0.174779	0.145313	-0.064961
LUSC	PDE3A	0.255381	0.0525669	0.047191	-0.0915933	0.0540763	-0.0889108	0.0334611	-0.0981129	0.551246	-0.0275547	0.00486387	0.129685	0.206066	-0.0584308	0.0618522	0.0862038	0.122208	-0.0713911	0.070665	0.0834562	0.903307	0.0056186	0.0387977	0.0953492	0.0307246	-0.0996791	0.0612715	0.0863959	0.981342	0.00108159	0.629515	-0.0223085	9.2456e-08	0.243297	0.504229	0.0308806	0.000239611	-0.168662	3.65601e-11	-0.299022	0.144224	-0.0674588	0.764132	-0.013877
PAAD	PDE3A	0.190031	-0.0992448	0.198783	0.0973259	0.227228	-0.0914819	0.026816	0.166917	0.146665	0.109856	0.000616028	-0.255647	0.0231575	0.171125	0.00791965	0.199568	0.48005	-0.053577	0.00652048	0.204345	0.00472947	0.21202	2.90101e-05	0.30959	0.000490483	-0.260076	0.982834	0.00163344	0.276428	-0.0824875	0.000132194	0.284181	0.0380833	0.156481	0.425727	-0.060416	0.0144445	0.184108	0.0109536	-0.191362	0.444182	0.0580404	2.99977e-06	-0.343739
PRAD	PDE3A	0.695662	-0.0179567	4.05532e-07	0.229471	0.792648	0.0120674	0.00364651	0.132871	0.251141	-0.0526459	0.0888898	-0.0779824	0.149802	0.0660449	0.0741307	0.0818439	0.704623	0.0174015	0.165079	0.0636635	0.232501	0.0547694	0.00177568	0.142743	0.00655059	-0.124331	0.580976	0.0253349	2.5911e-08	-0.25145	0.456863	-0.0341461	1.28423e-13	0.330471	NA	NA	0.00568858	-0.126434	0.0274475	-0.100971	0.630907	0.0220535	0.040011	-0.0940677
READ	PDE3A	0.195955	0.103756	0.00283373	0.236742	0.639758	-0.0376409	0.124525	-0.123108	0.0487866	-0.157535	4.6568e-06	0.356279	0.0418124	0.162658	0.0446708	-0.160478	0.331085	-0.0780739	0.466424	0.0585434	0.00110274	-0.258046	0.00201856	-0.244609	0.0374303	-0.166256	0.0816661	-0.13939	0.62387	0.039436	0.218591	0.0987361	0.116852	-0.125657	NA	NA	0.00728969	-0.213385	0.517308	0.0520571	0.302452	0.0828181	0.0220342	-0.182664
STAD	PDE3A	0.580814	0.0287988	1.94083e-05	0.220085	0.0311411	-0.112073	0.035761	0.109198	0.320983	0.051735	0.036739	-0.10863	0.618732	-0.025955	0.00794109	0.137811	0.00509506	-0.145333	1.08533e-08	0.291702	0.000954165	0.171063	0.0281438	-0.11414	0.822679	0.0116896	0.245775	-0.0604899	0.00273218	-0.155353	0.000956272	-0.171031	0.00841506	0.136803	0.156346	0.0738398	0.425605	-0.041543	2.56657e-06	-0.24167	0.922056	0.00510388	0.988786	0.0007332
THCA	PDE3A	0.773366	-0.0129758	0.0328754	0.0959195	0.117334	-0.0704798	0.0946715	0.075201	0.00669717	-0.121729	0.919195	-0.00457127	0.00338909	0.131456	0.68486	0.0182859	0.590101	-0.0242701	0.0334184	0.095625	0.47448	-0.0322194	0.399687	0.0379355	0.965852	-0.00192911	0.234067	-0.0535813	0.818	-0.010369	0.67162	-0.0191006	0.0540948	0.0866269	NA	NA	0.117311	-0.0704844	0.428694	0.0356509	0.522495	0.0288104	0.00159488	-0.141532
UCEC	PDE3A	0.029053	-0.0951834	0.00213342	0.133619	0.0383831	0.0903188	0.354371	-0.0404616	0.00734065	0.116774	0.208164	-0.0549681	0.867141	-0.00731153	0.693525	0.0172222	0.531536	-0.0273401	0.431243	0.0343894	0.820167	0.00993543	0.213739	0.0543018	0.763722	0.0131373	0.0156563	-0.105336	0.20794	-0.0549952	0.0158923	-0.1051	1.02357e-05	0.191058	NA	NA	0.00833807	-0.114917	0.844096	0.00859495	0.0866046	0.0747892	0.00392523	-0.125554
BRCA	PDE3B	0.747522	0.0108053	0.000179123	0.125273	0.0155263	-0.0810944	0.0465057	0.0667503	0.346588	-0.0315865	0.000563794	-0.115369	2.82389e-19	0.294569	2.80616e-11	-0.220677	0.81869	-0.00769453	0.00155982	-0.105885	0.0412358	-0.0684355	0.0099995	-0.0863027	7.82685e-09	-0.191951	0.444093	-0.0256847	2.92016e-05	-0.13961	2.09997e-25	0.339212	5.07716e-15	0.258197	0.396384	-0.0284625	6.4623e-09	0.193001	0.796469	0.00865751	9.72522e-13	0.236087	0.00870565	-0.0878899
CESC	PDE3B	0.0742124	0.114036	0.100205	0.105054	2.56628e-05	-0.264889	0.954014	0.00369555	0.442525	-0.0491826	0.201339	-0.081746	0.0477344	0.12636	0.106721	-0.103099	0.048606	-0.125873	0.105819	0.103364	0.0715457	-0.115095	0.293635	-0.0672237	0.0193337	-0.149056	0.914383	-0.00688969	0.325494	-0.0629469	0.00204369	0.195708	0.158602	-0.0901608	NA	NA	0.00183215	0.197722	0.576709	-0.0357602	2.7368e-07	0.320696	0.505241	-0.0426776
CHOL	PDE3B	0.256917	0.196899	0.438355	0.135304	0.577253	0.0975352	0.671521	0.0742779	0.771292	-0.0509534	0.99299	-0.00154105	0.643206	-0.0811152	0.650148	-0.0794285	0.0400819	0.348692	0.313148	-0.175538	0.894785	0.0231941	0.592794	0.0935966	0.00356902	-0.479406	0.405881	0.145014	0.809489	0.0422676	0.131183	0.260176	0.19467	-0.224557	0.0925321	0.288736	0.776028	0.0498704	0.0759485	-0.303875	0.0414146	0.346536	0.873033	0.0280249
COAD	PDE3B	0.151496	0.0688844	0.00122507	0.154522	0.332727	0.0465513	0.0983487	-0.0793544	0.305334	-0.0492599	0.0370331	0.100024	0.0895708	-0.0814959	0.0979413	-0.0794503	NA	NA	0.889838	0.00666009	0.658459	0.021253	8.23266e-05	-0.18765	0.00229956	-0.145804	0.919847	0.00483854	0.465934	-0.0350483	0.227408	-0.0579924	0.000452216	0.167468	0.0277097	0.105556	0.00153373	-0.151463	0.941472	-0.00353037	0.329084	0.046903	0.916184	0.00506047
ESCA	PDE3B	0.218616	-0.139061	0.00438752	0.315308	0.29815	0.117769	0.0791668	0.197446	0.778548	-0.0319351	0.0373257	-0.233245	0.702569	0.0433549	0.689942	0.045292	0.1232	-0.173764	0.0478257	0.221974	0.0458185	0.223958	0.869158	0.01871	0.571666	-0.0641808	0.242921	-0.13206	0.732427	0.038822	0.757066	0.035127	0.251687	0.129655	0.880659	0.0170526	0.805016	0.0280357	0.696724	-0.04425	0.984742	-0.00217235	0.637995	0.053407
HNSC	PDE3B	0.219649	-0.0555501	5.68521e-12	0.304497	0.119335	-0.0704563	2.55036e-05	-0.188968	0.0680703	-0.0824945	0.029278	-0.0984819	0.538323	-0.0278645	0.340831	-0.0431208	0.00045254	-0.157856	0.00071888	0.152292	0.534589	-0.0281209	0.799729	-0.0114898	0.000172212	-0.168918	0.130793	-0.0683539	0.000301553	0.16259	0.000975096	0.148523	0.275275	-0.0493822	0.557482	0.0265624	0.0659816	0.0831257	0.527276	0.0286258	0.00900787	0.117877	0.00372834	0.130792
KIRC	PDE3B	0.651322	0.0200984	0.879592	-0.00673765	0.0180491	-0.104881	1.27619e-06	0.212947	0.0123342	0.110958	0.326953	-0.0435791	0.851794	-0.00830957	0.00543179	0.123187	0.873661	-0.00707225	0.000208427	-0.163832	0.160433	-0.0623684	0.00392638	0.127748	0.000808829	-0.148165	0.000164067	-0.166453	0.977958	0.00122888	0.000137842	0.168337	0.0457257	-0.088687	NA	NA	0.157662	0.0627835	0.942595	0.00320276	2.87568e-06	0.205898	5.10877e-05	-0.178708
LIHC	PDE3B	0.101986	-0.0857319	0.00158433	0.164772	0.445938	-0.0400169	0.488669	0.036356	0.553451	0.0311171	0.0659917	-0.0963369	0.0342416	0.110859	0.0342412	0.110859	0.121583	0.0811793	0.0203303	0.121411	0.997286	0.000178623	0.941656	-0.00384404	0.0691557	-0.0952375	0.108239	0.0842098	0.351404	-0.0489148	0.909903	0.00594346	0.0739847	0.0936362	0.790851	0.0139286	0.000478396	-0.181906	0.791659	-0.0138735	0.140396	0.077319	5.393e-05	-0.209718
LUAD	PDE3B	0.839625	0.00903669	0.0262611	0.0989929	0.00828873	-0.117483	0.00630908	-0.121511	0.686123	0.0180444	0.618132	0.0222575	0.881834	-0.00663755	0.171209	-0.0610449	0.0157828	-0.107479	0.247958	-0.051556	0.616242	-0.0223772	0.00301085	0.131894	0.457857	0.0331415	0.415689	0.0363332	0.0163763	0.106882	0.122465	0.0688873	0.141963	0.0655055	NA	NA	0.00516241	0.124401	0.745425	-0.0144975	0.108427	-0.0715918	0.704582	-0.0169292
LUSC	PDE3B	0.204762	0.0585989	0.00699615	0.124253	0.0547817	-0.0886524	0.105474	0.0747677	0.541612	-0.0282242	0.0316774	-0.0991207	0.497454	0.0313728	0.197433	0.0595583	0.00425608	-0.131631	0.00410432	0.132155	0.114828	0.0728323	0.397993	-0.0390759	0.126191	-0.0706412	0.632942	0.0220857	0.066439	-0.0847363	0.0157859	0.111292	0.0404618	0.0945534	0.279912	0.0499424	0.00711752	0.123991	0.0830569	-0.0800322	0.618199	-0.023048	0.175503	0.0625946
PAAD	PDE3B	0.491587	-0.0521804	0.000863874	0.248928	0.886039	0.0108802	0.0356606	0.158479	0.92307	0.00733119	1.48265e-05	-0.320128	0.135128	-0.113072	0.247775	0.0875761	0.796221	0.0196034	0.990208	0.000931745	0.0283833	0.165264	0.804788	0.0187621	0.0183875	-0.17757	0.0159881	-0.181383	0.537167	-0.0468239	0.000698878	0.253161	0.146125	0.110002	0.0347642	0.159248	0.0152013	0.182742	0.166448	-0.10476	0.0567414	0.143894	0.00714973	-0.202094
PRAD	PDE3B	0.00345493	-0.133633	0.00214358	0.140219	0.188754	-0.06028	4.53185e-05	0.185606	0.0435583	0.0924569	0.0931795	0.0769576	1.04409e-09	0.274741	0.000148779	-0.172819	0.201671	-0.0585643	0.8519	0.00857052	0.0934435	-0.0768957	0.0388101	0.0946404	0.0481304	-0.0905363	0.746723	-0.0148255	0.840218	0.00925536	0.517503	0.0297046	0.339766	0.0438033	NA	NA	0.00203899	-0.140894	0.761847	0.0139118	0.312107	0.0463786	2.83292e-07	-0.232462
READ	PDE3B	0.311777	0.0812423	0.0347695	0.168618	0.560548	0.0467994	0.74051	-0.026639	0.04093	-0.163356	0.0434971	0.161358	0.507129	0.0533267	0.0293141	-0.173984	0.204211	-0.101879	0.109835	0.128106	0.00923837	-0.207147	0.000887094	-0.262714	0.197782	-0.103336	0.0230492	-0.181317	0.104891	0.129906	0.616607	0.040263	0.246099	0.093111	NA	NA	0.0253407	-0.178457	0.718787	0.028963	0.760944	-0.024473	0.08564	-0.137626
STAD	PDE3B	0.577008	0.0290889	1.24418e-07	0.270622	0.984721	-0.000998951	0.788217	0.0140119	0.0464734	0.103583	0.47772	0.0370224	0.00116469	-0.168189	0.0461144	-0.103752	0.415611	-0.0424455	0.0641845	0.0963256	0.800714	0.0131668	0.534073	0.0324271	0.011633	-0.131046	0.599788	0.0273657	0.467039	-0.0379256	0.0555524	-0.0996211	0.029273	0.11334	0.0965972	0.0865121	0.0706974	-0.0940729	0.0885817	-0.0886566	0.865216	-0.00885403	0.683236	0.0212832
THCA	PDE3B	0.633062	-0.0215104	2.97211e-07	0.227899	0.191308	-0.0588305	2.88049e-11	0.293157	1.34034e-06	-0.21525	0.146887	0.0652959	5.75232e-17	0.36414	1.02619e-08	-0.253796	0.0112115	-0.113903	3.67762e-05	-0.184362	4.64063e-15	-0.34238	0.00539266	0.124894	2.40531e-07	-0.229618	3.84953e-06	-0.205916	3.89254e-14	0.331195	8.63146e-16	0.350916	0.016877	-0.107355	NA	NA	0.485937	0.0313898	0.000803753	0.150163	2.44579e-11	0.294169	0.108529	-0.0722206
UCEC	PDE3B	0.0607263	0.0818324	0.351293	-0.0407208	0.609044	0.0223502	0.0998422	-0.0718306	0.264332	0.0487562	0.0455924	-0.0872083	2.2762e-06	0.204422	0.00706556	0.117326	0.0231417	-0.0990163	0.0548408	0.083774	0.00498938	-0.122254	0.224734	-0.0530234	0.100993	-0.0715885	0.147483	-0.063244	0.431434	0.0343751	8.58525e-08	0.23085	0.0529567	-0.0844321	NA	NA	0.388501	0.037676	2.53804e-06	0.203484	1.39486e-07	0.227138	1.66273e-18	-0.369959
BLCA	PDE5A	0.829238	-0.0108586	0.0240301	0.11325	0.00181539	-0.156064	0.116467	-0.0789108	0.609364	-0.0257223	0.0457595	0.10032	0.0296137	0.109189	0.0354191	0.105611	0.701292	-0.0193102	0.000188569	0.186341	0.494625	-0.0343756	0.817677	-0.0116064	0.806154	0.0123543	0.220921	-0.0615708	0.160349	-0.0705943	0.662973	-0.0219393	0.000291874	0.180872	0.00602463	-0.137617	0.0121765	-0.125719	0.0250582	-0.112445	0.481542	0.0354246	0.298282	-0.0523316
BRCA	PDE5A	4.83518e-05	-0.135767	7.63972e-07	0.164832	0.000538359	-0.115782	0.141857	0.0492774	0.686974	0.0135258	0.0034974	-0.0977901	0.282861	0.0360366	0.208462	0.0422023	0.393639	-0.0286282	1.63054e-15	0.262707	0.453596	-0.0251524	0.232325	-0.0400763	0.000172762	-0.125574	0.604721	0.0173739	0.793052	-0.00880619	0.0014933	-0.106307	2.55823e-18	0.286845	0.13883	-0.0496543	0.000560869	-0.115415	6.41542e-08	-0.180008	0.155715	0.0476261	5.85987e-14	-0.248175
CESC	PDE5A	0.878396	-0.0098048	0.000524446	0.219523	0.015284	-0.154506	0.00540686	0.176858	0.760847	-0.0195033	0.60726	-0.0329295	0.46064	-0.0472544	0.0530707	-0.123486	0.0178468	-0.150931	2.12566e-06	0.296948	0.154904	0.0909655	0.00550344	-0.176498	0.0474269	-0.126534	0.154409	-0.0910741	0.706335	-0.0241422	0.301593	-0.0661279	0.000646776	0.216017	NA	NA	0.5642	-0.0369392	0.0229384	-0.144986	0.149222	0.0922305	0.231299	-0.0765972
CHOL	PDE5A	0.590995	-0.0940501	0.721428	0.0624783	0.855783	-0.0318702	0.230539	0.207991	0.771339	-0.0509427	0.0498455	0.334057	0.235374	0.205897	0.223883	-0.210924	0.675167	0.0734055	0.270078	-0.191647	0.121175	-0.266889	0.804381	-0.0434232	0.880014	0.0264724	0.828333	-0.0380202	0.920421	-0.0175219	0.106855	-0.277256	0.0753355	0.304482	0.240351	-0.203771	0.0667229	-0.313445	0.344542	0.164659	0.719458	0.0629386	0.20012	-0.221911
COAD	PDE5A	0.776116	0.0136739	0.0611655	0.0898467	0.196391	-0.0620608	0.0130281	-0.11897	0.047743	-0.0949755	0.000161071	0.179957	0.0536484	0.0925879	0.331102	0.0467079	NA	NA	0.150137	0.0691133	0.000295365	-0.172725	0.365726	-0.0434725	0.543841	-0.0291819	0.650302	0.0217963	0.000156559	-0.180289	0.00558018	-0.132676	0.289052	0.0509464	0.546768	0.0289702	0.0145097	-0.117133	0.94614	-0.00324837	0.607054	0.0247254	0.381281	-0.0420813
ESCA	PDE5A	0.473554	-0.0812769	0.0115244	0.281161	0.142487	-0.165442	0.229621	0.135828	0.667356	-0.0487901	0.211458	-0.141227	0.0783324	0.197986	0.687164	-0.0457199	0.00643294	-0.302245	0.000155775	0.410471	0.121912	0.174354	0.0128229	-0.277128	0.593635	-0.0605538	0.490002	-0.0782921	0.00690655	-0.299756	0.418684	-0.0916683	0.000678564	0.372039	0.846929	0.0219248	0.0596209	-0.211531	0.342188	-0.107581	0.514972	-0.0738599	0.00970436	0.287536
HNSC	PDE5A	0.00503809	-0.126512	0.00010867	0.173955	0.0593416	-0.0852478	0.0131171	-0.111994	0.00520358	-0.126045	0.0964279	0.0751863	0.0156586	-0.109131	0.906048	0.00534544	0.0199151	-0.105143	0.00029936	0.162674	0.0896647	-0.0767532	0.187889	-0.0595885	1.21562e-05	-0.196209	0.0727882	-0.0811253	0.0134381	0.111607	0.13612	-0.0674248	0.105474	0.0732222	0.537001	-0.0279552	0.0407742	-0.0924588	0.592183	-0.0242578	0.102649	0.0738206	0.0125223	0.112734
KIRC	PDE5A	0.0182564	-0.104695	1.41188e-09	0.264463	0.100687	-0.0729139	0.00770237	0.11811	4.70916e-05	-0.179533	0.175338	-0.0602233	0.0005237	0.153349	6.55924e-05	0.176152	0.294117	0.0466373	1.18217e-07	0.232332	0.414599	0.0362739	0.846814	0.00859224	0.000743536	-0.149182	0.00794511	0.11765	0.0588676	-0.0838777	0.318861	-0.0443133	1.74834e-06	0.210244	NA	NA	0.0030719	-0.131104	1.78556e-09	-0.262865	0.720582	-0.0159077	7.85158e-08	-0.235498
LIHC	PDE5A	0.0403169	0.107385	0.326339	0.0515175	0.95428	0.00301128	0.00681514	0.141398	0.0172307	0.124608	0.00165058	0.164156	0.636344	-0.0248297	0.0130508	-0.129829	0.299917	0.0544052	0.283523	0.0562825	0.151745	-0.075179	0.762967	0.0158391	0.263211	-0.0587133	0.323826	-0.0517854	0.950606	-0.00325357	0.257981	-0.0593599	0.00712831	0.140624	0.740251	0.017411	0.00523216	-0.145878	0.693926	-0.0206672	0.00696686	-0.141019	0.104208	-0.0851828
LUAD	PDE5A	0.843857	0.00879506	0.142409	0.0654324	0.386964	-0.0386177	0.0125527	0.111122	0.00109618	0.145008	0.321679	-0.0442314	0.939053	-0.00341427	0.0092886	0.115766	0.00293108	-0.132257	6.1791e-07	0.219895	0.00270111	0.133358	0.00114936	0.144417	0.158483	-0.062909	0.864106	-0.0076425	0.0806053	-0.0779009	0.429183	-0.0352923	0.000392326	0.157322	NA	NA	0.202014	-0.0569255	0.00249446	-0.134422	0.873324	-0.00711954	0.0123991	-0.111315
LUSC	PDE5A	0.555947	-0.0272301	0.0189119	0.108241	4.68081e-05	-0.186627	0.696646	-0.0180291	0.423774	-0.0369821	0.0569842	0.0878629	0.647423	0.0211497	0.000863758	0.153171	5.58699e-05	-0.184761	4.07323e-05	0.18808	0.766881	-0.0137104	0.615621	-0.0232173	0.451272	-0.0348291	0.250026	-0.0531628	0.208714	-0.0580918	0.864204	0.00790971	8.83607e-05	0.179842	0.953025	-0.00272451	0.136038	-0.068863	8.71824e-08	-0.243766	0.278713	-0.0500669	0.6543	0.0207083
PAAD	PDE5A	0.574867	-0.0425634	0.674331	0.0318938	0.0354408	-0.158666	0.000143737	0.282706	0.869202	-0.0125012	0.000852764	-0.249189	0.00241501	0.227299	0.00690086	0.202962	0.215664	-0.0937907	0.000487932	0.260177	0.0040531	0.215618	0.00069232	0.253347	0.000103327	-0.288474	0.602259	0.03955	0.182511	-0.100946	0.00449652	0.213204	0.00124137	0.241517	0.15937	-0.106528	0.0761816	0.134018	0.000145425	-0.2825	0.600819	0.0397068	0.000520725	-0.258921
PRAD	PDE5A	0.550122	0.027428	1.45493e-07	0.237914	0.716184	0.0166891	4.52771e-06	0.2082	0.107275	-0.0738357	0.224452	-0.0557237	0.586506	0.0249654	0.355347	-0.0424115	0.176572	0.0619788	0.0226831	0.104325	0.362123	0.0418182	0.00180035	0.142559	0.000181828	-0.170571	0.331821	0.0445287	2.79341e-07	-0.232579	0.975914	0.00138605	2.1468e-16	0.364048	NA	NA	0.0369183	-0.0955739	0.0324351	-0.0979598	0.179075	0.0616229	0.0028138	-0.1365
READ	PDE5A	0.013585	0.196617	0.612392	0.0407448	0.415575	-0.0654272	0.69737	-0.0312779	0.322818	-0.0794155	0.000748859	0.266291	0.0305355	0.172713	0.597834	-0.0424206	0.118821	-0.124991	0.0325774	0.170682	0.000689852	-0.268007	0.26852	-0.0888418	0.370211	-0.0719973	0.0317402	-0.171501	0.322247	-0.0795089	0.0951483	-0.133658	0.678273	0.0333637	NA	NA	0.00654516	-0.216167	0.431601	0.0632083	0.113453	0.126829	0.21696	-0.099085
STAD	PDE5A	0.0201643	0.120748	2.73594e-05	0.216204	0.072186	-0.093582	0.0193076	0.121587	0.118238	0.0813562	0.0315769	-0.111787	0.328158	-0.0509744	0.0106602	0.132619	0.136068	-0.077638	0.000221972	0.190848	0.0084851	0.136658	0.0726229	-0.0934396	0.187465	-0.0686771	0.863732	-0.00895253	0.00146592	-0.164816	0.0974889	-0.0862824	1.66855e-06	0.246011	0.195133	0.0675037	0.311817	-0.0527229	0.00459166	-0.147047	0.519989	0.0335509	0.00891568	-0.135791
THCA	PDE5A	0.018463	-0.105873	0.00127433	0.14441	1.84963e-05	0.191181	5.71386e-19	0.385338	4.12506e-09	-0.260334	3.70909e-10	0.276805	0.537393	-0.0277862	0.86673	0.00756166	0.0303628	-0.097339	7.03004e-05	0.1777	4.67437e-11	-0.290139	0.065781	0.0827653	6.90542e-08	-0.239494	0.282473	-0.0484018	0.00413662	-0.128676	0.565068	0.0259204	0.0204909	0.104132	NA	NA	4.59702e-10	-0.275382	0.0115551	-0.113431	0.646017	0.0206942	0.000184726	0.167294
UCEC	PDE5A	0.248914	-0.0503608	0.00928989	0.113322	0.210885	0.0546414	0.712438	0.0161083	0.0238475	0.0985169	0.0158086	-0.105183	0.765589	-0.0130304	0.723815	0.0154433	0.196392	-0.0564188	0.00115037	0.14137	0.195842	-0.0564881	0.791135	0.0115746	0.333396	-0.0422578	0.104212	-0.0709228	0.254678	-0.049753	0.792128	0.0115182	1.92536e-07	0.224637	NA	NA	0.0105594	-0.111406	0.395671	0.0371102	1.46629e-05	0.187722	0.0013666	-0.139248
BLCA	PDE7A	0.142407	0.0737533	0.286309	0.0536444	0.176929	0.0679041	0.0419485	0.10214	0.0888524	0.0855081	0.756107	0.0156368	0.0725723	-0.0902148	3.95446e-07	-0.251212	0.0250065	0.112485	0.00914473	-0.130672	0.789219	-0.0134585	0.670513	-0.0214175	0.0151186	-0.121864	0.00464002	0.141813	0.239215	-0.0592043	0.536423	-0.0311187	0.0400452	0.103102	0.49949	0.0339893	0.824864	-0.0111412	0.0286425	0.109845	0.402175	0.0421594	0.335553	-0.0484555
BRCA	PDE7A	0.883929	0.00490047	0.0983131	0.0554469	0.00369812	0.097209	0.563825	-0.0193722	0.536097	-0.0207667	0.529794	0.0210886	3.48552e-12	0.230367	3.59025e-10	-0.208186	0.334937	0.0323576	3.02923e-20	-0.302159	6.22542e-05	-0.133802	0.019748	-0.0781291	3.34377e-05	-0.138588	0.518681	-0.0216611	0.00193693	-0.103769	1.77961e-20	0.303935	0.0713993	0.060464	0.309246	-0.0341214	0.00101072	0.110018	4.62253e-12	0.229081	0.00176761	0.104667	0.55748	-0.0196883
CESC	PDE7A	0.667055	-0.0275633	0.0245288	0.143363	0.0117741	-0.160372	0.0719223	0.114944	0.36882	0.0575437	0.710057	-0.0238218	0.651866	0.0289069	0.328915	-0.0625042	0.724858	0.0225531	0.282833	0.0687433	0.248372	-0.0738719	0.0172021	-0.151786	0.34623	0.0603075	0.00561648	-0.176084	0.0546789	-0.122667	0.687578	0.0257668	0.0523265	0.123872	NA	NA	0.844031	0.0126074	0.991373	0.000692899	0.188321	0.084157	0.0495942	-0.125329
CHOL	PDE7A	0.318516	0.173631	0.606593	-0.0901372	0.146579	0.250552	0.74541	0.056906	0.0926037	0.288675	0.384813	0.151551	0.467576	-0.1269	0.00636262	-0.452381	0.239014	0.204339	0.0460212	-0.339489	0.14078	-0.254085	0.647018	-0.0801881	0.523711	0.111492	0.207325	-0.218489	0.915089	-0.0186999	0.126572	-0.26322	0.98471	-0.00336134	0.11437	0.271694	0.208525	-0.217927	0.503102	0.117047	0.849505	-0.0332733	0.143899	0.252171
COAD	PDE7A	0.0231636	0.108862	0.019075	0.112356	0.213858	0.0597172	0.00290702	-0.142437	0.0177337	-0.113646	0.0597269	0.0903488	0.964586	-0.00213491	0.00327524	-0.140696	NA	NA	0.375142	0.0426261	0.978424	0.00130043	0.000101422	-0.185292	0.0172498	-0.114132	0.0881485	0.0818586	0.0579027	-0.0910001	0.00224449	0.146148	0.70215	0.018387	0.0203285	0.111221	0.267578	-0.0532716	0.357619	0.044212	0.144869	0.0700165	0.0753222	-0.0853624
ESCA	PDE7A	0.469836	0.0819592	0.868655	0.0187826	0.386783	0.098072	0.740014	0.0376801	0.788863	-0.0304112	0.122221	0.174212	0.415352	0.0923236	0.369666	-0.101638	0.0883378	0.191784	0.0176116	-0.264798	0.227533	-0.136433	0.0784252	-0.197926	0.359795	-0.103741	0.0344936	0.236735	0.0392014	-0.231053	0.15508	0.160457	0.00665755	0.301045	0.533473	-0.0706462	0.017118	-0.265924	0.237038	-0.133709	0.884432	-0.0165098	0.95795	0.0059892
HNSC	PDE7A	0.463962	-0.0331592	0.99233	-0.000435413	0.00301871	-0.133722	0.281162	0.0487817	0.902433	-0.0055521	0.0665571	0.0829502	0.000611413	0.15426	0.0225415	-0.103039	0.00850047	0.118762	0.00217926	-0.138135	0.110237	0.0722412	0.00343245	-0.131946	0.318492	-0.0451576	0.0780715	0.0796754	6.98734e-08	-0.240591	0.222789	-0.0551744	9.27815e-10	0.271999	0.419355	-0.0365621	0.000943277	-0.148938	9.75588e-07	-0.219068	0.0171534	-0.107633	0.0216006	-0.103767
KIRC	PDE7A	0.882773	-0.00655836	0.0781993	-0.0782149	0.036436	-0.0928469	0.0438796	0.0894528	0.336808	-0.0427006	0.0012988	-0.142321	0.0982737	0.0734343	0.735356	0.0150329	0.183499	0.0591057	0.00142609	-0.141142	0.493654	0.0304381	0.363734	0.0403811	0.0410462	-0.0906828	0.510619	-0.0292543	0.193818	0.0577442	0.287725	0.0472586	0.651021	0.0201171	NA	NA	0.0688469	0.0807909	0.0123399	0.110951	0.0737875	0.0793968	0.100568	-0.0729392
LIHC	PDE7A	0.013344	0.129418	0.35405	-0.0486471	0.998196	0.000118749	3.90365e-05	0.213534	0.845065	0.0102636	1.95036e-08	0.288681	0.404239	-0.0437867	1.34153e-07	-0.271727	0.938594	0.00404619	2.11577e-06	-0.24525	4.26068e-06	-0.238031	0.489628	0.036276	0.000505704	-0.181145	0.0133621	-0.129392	0.27681	0.0570724	0.00048685	0.181666	0.529581	-0.0330091	0.73311	0.0179083	0.984677	-0.00100873	0.000154944	0.196748	0.567305	-0.0300374	0.0011041	0.170107
LUAD	PDE7A	0.580509	0.0246741	0.101009	0.0731343	0.12698	-0.068069	0.0708356	-0.0805385	0.205794	0.0564523	0.549768	0.0267034	0.00288849	0.132455	0.116947	-0.0699198	0.723391	-0.0158036	0.112161	-0.0708468	0.680165	-0.0184067	0.0105093	-0.113881	0.367749	-0.0402039	0.57776	0.0248535	0.447604	-0.0339015	0.804403	0.0110584	0.316783	0.0446808	NA	NA	0.0455131	0.0891257	0.348011	0.0418878	0.992372	0.000426896	0.220202	0.0547049
LUSC	PDE7A	0.00242731	0.139554	0.174577	-0.0627288	0.807775	-0.0112521	0.00691665	-0.124427	0.130163	-0.0699114	0.0267033	0.102213	0.167621	0.0637545	0.00602601	-0.126508	0.701899	-0.0177011	0.343699	-0.0437721	0.979005	0.00121711	0.880921	0.00692819	0.106659	0.0745152	0.490886	0.0318534	0.00103148	-0.150912	0.459441	-0.034204	0.0504377	0.0902904	0.0744535	0.0823608	0.853818	-0.00852132	0.552932	0.0274381	0.0105061	-0.117926	0.0491345	0.0908047
PAAD	PDE7A	0.239776	0.0890686	0.0205131	0.174538	0.470513	-0.0547453	0.128821	0.114921	0.735817	0.0256106	0.117518	-0.118416	0.187404	0.0998333	0.0171623	-0.179459	0.043448	-0.152412	0.903216	-0.00923156	0.925917	-0.00705909	0.225951	0.0917327	0.000115524	-0.286539	0.112152	-0.120167	0.528415	0.0478338	0.000387469	0.264579	0.706626	-0.0285693	0.0159368	0.18147	0.000120164	0.285852	0.495681	-0.051689	0.143401	0.110746	0.571817	0.042903
PRAD	PDE7A	0.614633	0.0231099	0.000907307	0.151432	0.397523	0.0388254	0.047144	0.0909373	0.439178	0.0355018	0.471705	0.0330308	0.0005933	0.156701	0.511909	-0.0301023	0.234203	0.0545707	0.0541197	-0.0882393	0.72848	0.0159356	0.00217127	0.140046	5.45131e-05	-0.183675	0.08048	0.0801127	0.000463656	-0.159685	0.0322051	0.0980896	0.00224095	0.139618	NA	NA	0.0432218	-0.0926049	0.131717	0.0691163	0.839614	0.00929087	0.79258	0.0120715
READ	PDE7A	0.125719	0.122722	0.0125128	0.198903	0.360245	0.0735055	0.0320838	-0.171163	0.00620876	-0.217517	9.35933e-06	0.345479	0.262756	0.0899151	0.0114821	-0.20127	0.576515	-0.0449081	0.192561	0.104544	3.6339e-05	-0.323268	0.103175	-0.130546	0.224222	-0.0975457	0.162047	-0.112134	0.301469	-0.0829863	0.63189	0.0385275	0.334081	-0.0775931	NA	NA	0.0165309	-0.191061	0.0949882	0.133722	0.745377	0.0261215	0.0100869	-0.20479
STAD	PDE7A	0.0042366	0.148362	5.83141e-05	0.207391	0.998014	-0.000129862	0.422784	-0.0417965	0.784858	-0.0142398	0.656029	0.0232309	0.590594	-0.0280575	0.000497021	-0.180165	0.161274	-0.0729739	0.526346	-0.0330418	0.00535036	-0.144521	0.00736559	-0.139111	0.00685507	-0.140343	0.876477	0.00810808	0.565493	-0.029972	0.0672367	0.0952476	0.0276264	0.114516	0.0841021	0.0899237	0.664712	0.0226059	0.013538	0.128276	0.659791	-0.0229596	0.73929	0.0173586
THCA	PDE7A	0.13296	0.0676274	0.00486103	0.126386	0.502957	-0.0301767	3.30648e-06	0.207287	0.848608	-0.00860167	0.819445	0.0102852	0.00818795	0.118728	0.00258585	-0.135149	0.76566	-0.01343	0.931371	-0.00388062	0.000107338	-0.173216	0.853582	0.00831576	0.0885048	-0.0766405	0.265925	-0.0500982	0.374387	0.0400106	0.0626795	0.083731	0.32479	0.0443476	NA	NA	0.755231	-0.0140469	0.0407255	0.0920124	0.0124232	0.11229	0.564761	-0.0259408
UCEC	PDE7A	0.862353	-0.00757763	0.159803	0.0613812	0.000649815	0.14821	0.00242339	-0.131969	0.0365142	0.0912055	0.171252	0.0597448	0.515408	-0.0284224	0.002175	0.13337	0.978954	0.00115296	0.587851	0.0236833	0.125047	-0.0669666	0.65506	0.0195235	0.0928889	-0.0733426	0.0274494	-0.0961514	0.110414	-0.0696847	0.252399	-0.0499922	0.0160247	0.104969	NA	NA	1.60348e-06	-0.207412	0.00266569	0.130724	0.00244006	0.13188	2.65328e-12	-0.298715
BLCA	PDE7B	0.133074	0.0755181	0.000440738	0.175565	0.100031	0.0826647	0.109742	0.0803928	0.960529	-0.00249168	8.05375e-07	-0.244632	1.67514e-05	-0.21419	0.610231	-0.02566	0.451156	-0.0379225	0.000143254	0.189704	0.00162805	0.157643	0.0295954	-0.109201	0.652513	-0.0226672	0.0156578	-0.12123	0.566577	0.0288481	2.83274e-05	-0.20846	0.00296621	0.14876	0.116527	0.0788979	0.0884932	-0.0856041	0.0260325	-0.111708	0.271082	0.0553685	7.35821e-06	0.222865
BRCA	PDE7B	0.973751	-0.00110448	1.13877e-07	0.176608	0.0293806	-0.0730233	3.83242e-05	0.137551	0.0554489	-0.0642264	5.50512e-12	-0.228281	0.0329937	0.0714792	0.182755	-0.0447	0.2279	-0.0404583	3.16438e-12	0.230805	0.100051	0.0551629	0.0711264	-0.0605223	0.000240692	-0.122791	0.912507	0.00368824	0.367119	-0.0302668	0.0475627	0.0664318	3.05711e-15	0.260222	0.156371	-0.0475508	0.0187394	0.078783	5.1998e-06	-0.152061	8.60236e-07	0.16407	6.2784e-12	-0.227677
CESC	PDE7B	0.683999	-0.0260785	0.0468293	0.126874	0.018003	-0.150727	0.375825	-0.0567082	0.00315765	-0.187493	0.31246	-0.0646619	0.445692	0.0488424	0.25034	-0.0735663	0.0565198	-0.121754	0.0073264	0.170588	0.1338	-0.0958587	0.960601	0.00316574	0.51255	-0.0419484	0.724339	-0.0225974	0.0174027	0.151517	0.594887	-0.034068	0.117286	0.10012	NA	NA	0.880477	-0.00963574	0.99588	0.000330945	0.0238117	0.144083	0.981129	-0.00151581
CHOL	PDE7B	0.387216	-0.150795	0.0493522	0.334738	0.989058	-0.00240546	0.273359	-0.190364	0.698221	0.0679283	0.23894	-0.20437	0.0628003	0.317832	0.178918	-0.232509	0.501511	0.11748	0.670059	-0.0746281	0.553779	-0.103576	0.194907	-0.224441	0.0360153	-0.355652	0.303654	0.178961	0.0270308	0.373655	0.0228649	0.383738	0.990443	-0.00210099	0.43647	0.135857	0.0713107	0.308565	0.196874	0.223481	0.74661	0.0566286	0.559332	-0.102137
COAD	PDE7B	NA	NA	NA	NA	NA	NA	NA	NA	NA	NA	NA	NA	NA	NA	NA	NA	NA	NA	NA	NA	NA	NA	NA	NA	NA	NA	NA	NA	NA	NA	NA	NA	NA	NA	NA	NA	NA	NA	NA	NA	NA	NA	NA	NA
ESCA	PDE7B	0.478288	-0.0804122	0.209938	0.141694	0.666439	-0.048933	0.265132	0.126074	0.31184	-0.114504	0.223542	-0.1376	0.394929	0.096408	0.776883	0.0321815	0.0343426	-0.236928	0.00820214	0.293642	0.332925	0.109651	0.32028	0.112537	0.841835	0.0226638	0.0185122	-0.26281	0.258291	-0.12788	0.585503	-0.0618892	0.375477	0.100417	0.846921	0.021926	0.658067	-0.0502418	0.646593	-0.0520463	0.964587	0.00504322	0.251641	0.129667
HNSC	PDE7B	0.000694949	-0.152706	0.00240109	0.136835	0.0095136	-0.117037	0.083724	-0.0782098	1.96469e-07	-0.2324	0.0784923	0.0795634	0.471222	-0.0326232	1.88579e-05	0.191951	0.00942479	-0.117182	0.000118129	0.173052	0.824862	-0.0100225	0.091282	0.0763701	0.000696802	-0.152673	0.739173	-0.0150787	0.690001	-0.0180631	0.284528	-0.0484422	0.000198669	0.167325	0.537283	-0.0279358	0.00322269	-0.13282	0.00133583	-0.144538	0.0667547	0.0828902	0.710352	-0.0168191
KIRC	PDE7B	0.000494357	-0.154025	3.10497e-07	0.224673	0.841473	0.00889573	5.58709e-05	0.177796	0.00814243	-0.117285	8.65874e-14	-0.32287	7.35939e-06	0.197427	0.00113115	0.144049	0.5295	0.0279605	1.86044e-16	0.354151	4.13262e-07	0.222353	0.741381	-0.0146779	0.173892	-0.0604253	7.03281e-06	0.197845	7.28634e-05	-0.175066	6.62841e-05	-0.176044	1.13501e-07	0.232649	NA	NA	0.00911314	-0.115598	1.27834e-08	-0.249032	0.385055	-0.0386195	2.05831e-22	-0.413611
LIHC	PDE7B	0.236749	0.0620822	0.898563	-0.00669531	0.39788	0.0443814	0.832893	-0.0110815	0.974432	0.00168336	7.17011e-06	-0.232513	0.399042	0.0442723	0.00383391	0.150998	0.0797493	0.0918324	0.00780709	0.139046	0.00194031	0.161706	0.651214	0.0237408	0.427338	0.0416719	0.101002	0.0859782	0.413815	-0.0429016	0.036663	-0.109416	0.00431014	0.149088	0.902004	0.00646707	0.00982416	-0.13499	0.138838	-0.077623	0.281961	0.0564652	1.90372e-07	-0.268523
LUAD	PDE7B	0.0905074	0.0754799	0.776719	-0.0126634	0.337691	0.0427922	0.93857	-0.00344141	0.617084	0.0223239	0.310293	-0.0452835	0.00163065	-0.139985	0.700154	0.0171957	0.735881	-0.0150616	0.00165983	0.139756	0.849936	0.00844844	0.0479545	0.0881443	0.638757	-0.0209601	0.750266	-0.0142123	0.00131281	0.142747	0.000152902	-0.167874	0.000691636	0.150641	NA	NA	0.00464812	-0.125889	0.0227568	-0.101438	0.108619	-0.0715531	0.770948	0.0129999
LUSC	PDE7B	0.153129	0.0659987	0.809936	-0.0111231	0.98273	0.00100115	0.261931	-0.0518498	0.113497	-0.0730999	0.109741	0.0738687	0.167825	-0.063724	0.916491	-0.0048495	0.156846	-0.0654083	0.0155495	0.111544	0.155575	-0.065609	5.29112e-06	0.208257	0.158589	-0.0651351	0.938192	0.00358631	0.990767	-0.000535186	0.206974	-0.0583142	3.74924e-05	0.188941	0.469264	0.0334605	0.0036033	-0.134023	1.85091e-05	-0.196122	0.869892	0.00757537	0.141368	0.0679415
PAAD	PDE7B	0.2311	-0.0907274	0.000126959	0.28489	0.608632	-0.0388578	0.288985	0.0803702	0.0165248	0.180489	1.00389e-05	-0.326073	0.576883	0.0423394	0.411566	0.0622795	0.881164	-0.0113491	0.0906623	0.12792	0.0277253	0.165948	0.0069902	0.202648	0.0394277	-0.155418	0.136456	-0.112692	0.662962	-0.0330784	0.00148825	0.237724	0.523166	0.0484437	0.533136	0.0472881	6.71051e-05	0.295835	0.181641	-0.101146	0.167448	0.104515	0.00383465	-0.216896
PRAD	PDE7B	0.237697	-0.0541658	0.000585117	0.15687	0.869675	0.00753195	0.000124837	0.174763	0.126961	-0.0699777	0.00121986	-0.147659	0.924506	-0.00435011	0.305229	0.047042	0.334721	0.0442627	0.00107205	0.149316	0.336699	0.044082	0.00300274	0.135598	0.0240217	-0.103325	0.976331	0.00136205	0.0028751	-0.136202	0.239865	-0.0539167	1.88966e-06	0.216152	NA	NA	0.0192646	-0.107131	0.0385085	-0.0947866	0.372856	0.0408926	0.0233076	-0.103852
READ	PDE7B	NA	NA	NA	NA	NA	NA	NA	NA	NA	NA	NA	NA	NA	NA	NA	NA	NA	NA	NA	NA	NA	NA	NA	NA	NA	NA	NA	NA	NA	NA	NA	NA	NA	NA	NA	NA	NA	NA	NA	NA	NA	NA	NA	NA
STAD	PDE7B	0.00128973	0.166701	1.95768e-09	0.305534	0.898847	0.00663089	0.0368592	0.108561	0.849542	0.00989542	1.16459e-06	-0.249575	0.00188709	-0.161038	0.364052	0.0473213	2.92648e-05	-0.215434	2.54502e-13	0.36817	9.4478e-05	0.201572	0.0457389	-0.103931	0.335129	-0.0502457	0.0129856	-0.129042	0.964582	0.00231634	9.87905e-07	-0.251188	0.000402077	0.183032	0.148282	0.0753027	0.994881	0.000334658	1.3337e-08	-0.289987	0.329964	0.0507847	0.27341	0.0570857
THCA	PDE7B	0.665129	-0.0195023	0.966306	-0.00190341	4.63448e-12	-0.304237	3.89005e-15	-0.343288	0.000338067	0.16046	0.00191233	-0.139165	0.97492	-0.00141663	3.08513e-06	0.207909	0.27238	0.0494281	0.0175219	0.106739	0.0207298	0.103937	0.119576	-0.0700531	0.0343752	0.0951158	0.00111409	0.146109	0.596817	-0.0238329	5.99967e-07	-0.222093	0.719458	0.016184	NA	NA	0.000849033	0.14949	0.666753	0.0194017	0.815799	-0.0104967	4.00651e-12	-0.3051
UCEC	PDE7B	0.911013	-0.00488458	0.331106	0.0424582	0.0125065	0.108832	0.897725	-0.00561773	0.128562	0.0663511	2.94604e-05	-0.181075	0.219867	0.0535836	0.359031	0.0400716	0.0274994	-0.0961205	2.8699e-06	0.20242	0.477985	0.031004	0.13017	0.0660739	0.473667	0.0313088	0.107902	-0.0701793	0.418244	-0.0353677	0.218298	-0.0537662	0.000271829	0.158121	NA	NA	0.21434	-0.0542307	0.973741	0.00143868	0.000689256	0.147518	1.75803e-06	-0.206631
BLCA	PKM	0.859207	0.00893059	3.76942e-15	-0.380834	0.261433	0.0564953	0.00142289	0.159576	0.0243296	0.113013	0.594836	0.0267719	0.188679	0.066109	0.114935	-0.0792424	0.244488	0.0585461	0.330539	-0.04896	0.913282	0.00548278	0.00254102	0.151096	0.178483	0.0676617	0.0676016	0.091823	7.17601e-06	-0.223124	0.0174474	0.119255	0.0158302	0.121031	0.267165	-0.0558226	0.490724	0.0346868	0.117829	0.0786188	0.731634	0.0172655	2.14355e-07	-0.256734
BRCA	PKM	0.37523	-0.0297581	0.00147054	-0.106455	0.271184	0.0369228	0.00801108	-0.088831	0.205209	-0.0425054	3.0477e-20	0.302139	0.998802	5.04025e-05	0.00469951	0.0946794	0.0364281	0.0701401	5.14889e-10	-0.206354	3.30643e-05	-0.138673	0.0196474	0.078193	2.35643e-06	-0.157454	0.000111019	0.129198	0.017947	-0.0793187	0.00627621	0.0915463	0.000306336	-0.12073	0.777742	0.00947458	8.5517e-08	-0.178313	0.716484	-0.0121899	0.592881	-0.0179458	0.318835	0.0334523
CESC	PKM	0.0639186	-0.118314	0.195679	-0.0827799	0.133461	0.0959421	0.827117	-0.0139953	0.665268	-0.0277208	0.101929	0.104527	0.440218	0.0494314	0.731365	-0.021998	2.53839e-07	0.32153	5.64112e-05	-0.253848	0.826704	-0.0140293	0.241405	0.0749676	0.16746	0.0882894	0.0541176	0.12295	0.020273	-0.147936	0.798014	0.0163992	0.0643738	0.118113	NA	NA	0.0622709	-0.119051	0.373039	-0.0570393	0.0052491	-0.177458	0.000971167	-0.209057
CHOL	PKM	0.311028	-0.176296	0.993613	0.00140401	0.959897	0.00881942	0.713626	-0.0643037	0.627721	0.0849045	0.0177395	0.398487	0.534259	-0.108691	0.645026	0.0806723	0.495232	0.119198	0.346538	-0.163988	0.25763	-0.19661	0.0518675	0.331319	0.255801	-0.197353	0.434738	-0.136366	0.596106	0.0927631	0.948623	0.0113017	0.0823445	-0.297759	0.240351	-0.203771	0.376017	-0.154342	0.523076	0.111662	0.135233	0.257567	0.729823	-0.0605212
COAD	PKM	0.33575	-0.0462614	0.273094	-0.0526626	0.0635542	0.089034	0.000200105	-0.177401	0.0210088	-0.11063	0.0112271	0.121469	0.00700602	0.12912	0.0048732	-0.134755	NA	NA	0.276322	-0.05231	0.501837	-0.0322854	0.970772	-0.00176181	0.389338	-0.0413745	0.00655253	0.130174	3.39701e-05	-0.197351	0.647107	-0.0220098	0.00521333	-0.133723	0.332627	0.0465609	0.245925	0.0557495	0.587951	0.0260483	0.0722295	0.0862791	0.524446	0.030599
ESCA	PKM	0.591598	0.0608875	0.0597405	-0.211434	0.173802	0.153576	0.548078	-0.0681483	0.78418	-0.0311023	0.0267955	0.247615	0.295833	-0.118332	0.657226	-0.0503737	0.0385663	0.231785	0.00375396	-0.320472	0.18275	-0.150478	0.602132	-0.0591673	0.819491	0.0259172	0.0127715	0.277281	0.715525	-0.0413802	0.150841	0.1621	0.302042	0.116831	0.174094	0.153473	0.00673565	-0.300636	0.0170972	-0.265972	0.846178	-0.0220337	1.61788e-05	-0.461818
HNSC	PKM	0.0895597	-0.0767782	0.00592769	-0.124147	0.970966	0.00164847	0.681306	-0.0185986	0.861458	0.00790402	0.000613252	0.154224	0.00350862	0.131641	0.659952	0.0199252	0.0099655	0.11632	0.00462832	-0.127731	0.868344	0.00750746	0.298391	0.0470717	0.254637	0.0515594	0.0276394	0.0994999	4.30644e-09	-0.261313	0.0725982	-0.081179	9.1757e-07	0.219594	0.0462134	0.0901013	3.39466e-05	-0.1861	6.66666e-09	-0.258182	0.00382836	-0.13042	4.61075e-07	-0.225405
KIRC	PKM	0.690339	-0.0177182	0.0859531	-0.0762628	0.900572	-0.00555691	0.0818257	0.0772833	0.0808668	-0.0775264	0.525293	-0.0282467	0.0840593	0.076726	0.00299046	0.131467	0.570252	-0.0252449	0.24478	0.0516981	0.0380489	0.0920646	8.48402e-05	0.173482	0.726079	-0.0155816	0.000833405	-0.147802	0.743804	0.0145353	0.22334	-0.0541202	0.879843	-0.00672351	NA	NA	0.915118	-0.00474063	0.33362	-0.042983	0.703384	0.0169338	0.60598	-0.0229393
LIHC	PKM	0.000341685	0.186455	3.67352e-06	-0.239579	0.993945	0.000398579	0.0132164	0.129595	0.209863	0.0657889	2.63306e-17	0.423361	0.00102528	-0.171183	6.5725e-05	-0.207348	0.300011	0.0543946	7.21779e-07	-0.255924	0.000123767	-0.199578	0.0331006	0.111569	0.00164754	-0.164184	0.0373563	-0.109018	0.0954398	0.0874071	0.00101055	0.171392	0.0276823	-0.115256	0.697751	0.0203954	0.376417	-0.046432	0.000872328	0.173507	0.144176	-0.0765921	5.87486e-05	0.208696
LUAD	PKM	0.00103065	-0.145773	0.010139	-0.114432	0.532185	0.0278891	0.268684	0.049362	0.197017	0.0575608	0.0101324	0.114441	0.115405	0.0702151	0.014779	0.108535	0.0773797	0.0787415	0.716921	-0.0161896	0.220848	0.0546286	0.0124019	0.111311	0.0252012	0.099701	0.131916	0.0671997	0.00595379	-0.122352	0.374062	0.0396773	0.00231882	-0.135392	NA	NA	0.00582447	-0.122669	0.462744	-0.0327825	0.0365593	-0.0931538	0.985717	-0.000799406
LUSC	PKM	0.000272914	-0.167151	0.00366823	-0.133768	0.13438	0.0691553	0.0376359	0.095922	0.325269	0.0454718	0.048229	0.0911688	0.972055	0.00162019	0.000461575	0.160915	0.000354533	0.164074	0.0111222	-0.117017	0.990866	0.000529461	0.00697787	0.124293	0.451796	-0.0347888	0.0150094	0.112131	0.155865	-0.0655631	0.230798	-0.0553788	0.0843509	0.0796991	0.742578	-0.0151895	0.0015501	-0.145606	4.877e-06	-0.209023	0.214253	-0.0573927	0.00405092	-0.132344
PAAD	PKM	0.456243	0.0565179	0.063536	-0.140165	0.453804	0.0568239	0.864088	0.0129947	0.0850371	0.130189	0.000499279	0.259734	0.123756	0.116456	0.476913	0.0539599	0.608822	0.0388372	0.544427	0.0459925	0.0695316	-0.137137	0.478566	0.0537579	0.73288	0.0259065	0.804091	0.0188305	0.700472	0.0291985	0.104057	-0.122937	0.102723	-0.12341	0.109103	-0.121191	0.01213	-0.188716	0.396754	0.0642695	0.388282	-0.0654278	0.632273	-0.0363174
PRAD	PKM	0.2397	-0.0539357	0.209391	-0.0575769	0.068101	0.0836038	0.0267248	0.101446	0.695002	-0.0179977	0.139833	0.0677003	0.11636	0.0719918	0.281208	0.0494399	0.232399	-0.0547814	0.372606	0.0409139	0.452734	-0.0344599	0.367296	0.04137	0.105882	-0.0741292	0.834115	0.009614	0.0265267	-0.101578	0.376994	0.0405401	0.902066	0.00564896	NA	NA	0.297175	-0.0478315	0.153071	-0.0655203	0.132442	-0.0689872	0.857551	0.0082399
READ	PKM	0.817806	0.0185319	0.983264	-0.00168767	0.0243227	0.179699	0.531539	-0.0503033	0.662664	-0.0350852	0.641867	0.0374041	0.896524	0.0104628	0.984962	0.00151639	0.131432	0.120914	0.3865	-0.0695851	0.100102	-0.131714	0.323513	0.0793018	0.0148936	-0.194031	0.769166	-0.0236065	0.778024	0.022676	0.134537	0.119956	0.375598	-0.0711925	NA	NA	0.103451	-0.130443	0.523941	0.0512367	0.039963	0.164136	0.0609252	-0.149916
STAD	PKM	0.0159141	-0.125265	0.066007	-0.095677	0.728973	0.018073	0.0017821	-0.161901	0.99926	4.83629e-05	2.98624e-05	0.215203	0.081729	0.0906171	0.634422	0.0248008	8.85291e-05	0.202366	1.24021e-06	-0.248955	0.000629469	-0.176919	4.20895e-05	0.211233	0.00296935	-0.154048	1.34062e-09	0.308496	0.507714	-0.0345432	0.0100545	0.133665	0.787927	-0.0140316	0.578176	-0.0289998	0.0727257	-0.0934061	0.000631534	0.176873	0.187576	-0.0686598	0.0062447	-0.141927
THCA	PKM	0.867864	-0.0074967	0.29158	0.0474968	3.15862e-08	0.245469	1.50612e-18	0.38101	2.3077e-05	-0.189012	4.8486e-05	0.181549	0.899553	-0.00568777	0.311107	-0.0456182	0.824457	0.00999492	0.373426	0.0400911	0.00410324	-0.12879	0.0234965	0.101809	0.00311291	-0.132626	0.00972116	-0.116114	0.82789	0.0097963	0.0595412	0.0847492	0.2326	-0.0537494	NA	NA	2.2751e-06	-0.210621	0.617074	-0.0225275	0.868814	-0.00744232	4.25336e-05	0.182887
UCEC	PKM	0.522658	-0.0279338	0.0123119	-0.109073	0.00200469	0.134418	0.1866	-0.0576747	0.125299	0.0669222	0.0121223	0.109311	0.093304	0.0732498	0.301187	0.0451643	0.0504586	0.0853355	0.0136528	-0.107479	0.0531258	-0.0843723	0.00281971	0.129984	0.312136	0.0441543	0.731444	0.0149993	0.585073	0.0238596	0.213194	0.0543664	0.0171002	-0.103937	NA	NA	0.0627305	-0.0812068	0.0936448	0.0731739	0.313286	0.0440497	3.97421e-12	-0.296397
BLCA	PPAT	0.479534	-0.0355869	0.0543529	-0.0966421	0.564685	0.0289888	0.451426	0.0378999	0.123279	0.0774763	0.00616946	0.13723	0.0958289	0.0837023	0.000762357	-0.168265	0.0232019	0.113921	0.000740732	-0.168656	0.0573297	-0.0954809	0.339637	0.048048	0.401464	-0.0422231	0.000902284	0.16596	0.0113614	-0.126932	0.0211123	0.115709	0.623497	0.0247117	0.502685	-0.0337367	0.720834	0.0179898	0.00228268	0.152696	0.545186	0.0304525	1.59945e-05	-0.214687
BRCA	PPAT	5.81628e-07	-0.16657	0.0523606	0.0650567	0.797077	0.00863104	0.260129	-0.0377861	0.0392488	0.0691184	0.649908	0.015235	0.000173594	0.125534	0.048019	0.0662961	0.0473581	0.066493	0.0134431	-0.0828292	0.158469	-0.0473114	0.113028	0.0531574	3.58615e-07	-0.169608	0.034788	0.0707655	0.180843	-0.0448958	1.55782e-05	0.144263	0.00263717	0.100685	0.107932	0.053922	1.18125e-06	-0.162016	0.0474744	0.0664582	0.580596	0.0185448	7.38599e-09	-0.192269
CESC	PPAT	0.770169	-0.0187208	0.0164295	0.152848	0.263633	-0.0715442	0.979507	-0.00164613	0.222435	0.0780683	0.978254	0.00174681	0.127396	0.0974602	0.82325	-0.0143135	0.0194018	0.148974	0.215902	-0.0791793	0.585443	-0.0349441	0.836734	-0.0132054	0.282244	-0.0688274	0.272205	0.0702773	0.00148666	-0.20152	0.218477	0.0787385	0.341512	0.060899	NA	NA	0.696148	-0.0250226	0.674564	0.0269036	0.857772	0.0114842	9.92531e-05	-0.24561
CHOL	PPAT	0.381213	-0.152689	0.602659	0.09112	0.432918	0.136901	0.631663	0.0839363	0.698241	-0.0679236	0.189918	0.226907	0.211201	0.216682	0.169442	-0.237535	0.283683	0.18639	0.0493691	-0.334715	0.0676728	-0.312414	0.0818996	0.298172	0.227329	-0.209398	0.636996	0.0826305	0.865317	-0.0297431	0.956074	-0.00966113	0.698819	0.0677871	0.380774	-0.152828	0.0750538	-0.304762	0.0677659	0.312313	0.436325	0.135899	0.91476	-0.0187728
COAD	PPAT	0.238366	0.0566502	0.02578	0.106898	0.148747	0.0693493	0.00219611	-0.146457	0.0438771	-0.0966762	0.218582	0.0591073	0.514754	0.0313172	0.0188076	-0.112607	NA	NA	0.48177	-0.0338159	0.608882	0.0245998	0.0856277	-0.0825131	0.0601169	-0.0902117	0.00414628	0.137197	7.76261e-05	-0.18831	0.00704831	0.129025	0.147032	0.0696427	0.296062	0.0502127	0.162339	-0.0671105	0.566879	0.0275307	0.0465438	0.0954903	0.000390736	-0.169289
ESCA	PPAT	0.702374	-0.0433847	0.187612	0.148841	0.239147	0.133115	0.732055	-0.0388781	0.387039	0.0980195	0.33004	0.110304	0.704871	-0.0430031	0.387113	-0.0980042	0.0909416	0.190262	0.0861596	-0.193085	0.880225	0.0171152	0.996281	-0.000529462	0.606909	-0.0583917	0.987313	0.00180631	0.22848	0.136158	0.246123	0.131175	0.0542854	0.216023	0.219303	-0.138856	0.0482128	-0.2216	0.0341099	-0.237227	0.975372	0.00350677	0.762978	-0.0342459
HNSC	PPAT	6.91018e-06	-0.201555	0.033922	0.095841	0.533701	0.028182	9.32544e-05	-0.175598	0.3	0.0469153	0.206407	0.0571788	0.229631	0.0543683	0.358149	-0.0415999	0.0039528	0.12997	0.00889316	-0.118073	0.586422	0.0246359	0.557752	-0.0265442	2.8515e-05	-0.187854	0.000101463	0.174694	0.971401	-0.00162374	0.112056	0.0718752	1.32422e-05	0.195386	0.446393	0.0344762	1.85667e-05	-0.192103	0.000746791	-0.151826	0.878935	-0.00689861	4.74726e-08	-0.243579
KIRC	PPAT	0.433228	-0.0348455	0.968725	0.00174383	0.383034	-0.0387839	4.99183e-05	0.178943	0.283829	0.0476419	0.000781869	-0.148576	0.000613405	0.151482	4.17327e-05	0.18075	0.600247	0.023305	0.361605	0.0405605	0.00253773	0.133666	3.62229e-06	0.20385	0.000559661	-0.152568	0.0980848	-0.0734755	0.136465	-0.066158	0.436391	0.0346064	0.0388365	0.0916929	NA	NA	0.0308552	-0.0958029	0.043225	-0.0897309	0.0330313	0.0945999	1.20592e-13	-0.321077
LIHC	PPAT	0.0188677	0.122862	0.244104	0.0611205	0.941794	-0.00383495	0.0783349	0.0922649	0.0307935	0.113071	2.86014e-06	0.242169	0.756883	-0.0162587	0.19869	-0.06743	0.916972	-0.00547539	0.823861	0.0116902	0.10919	-0.0839842	0.0339389	0.111045	0.206225	-0.0663161	0.833912	-0.011013	0.14311	-0.0767956	0.181038	0.0701658	0.292834	-0.0552077	0.271516	0.0577045	6.69081e-05	-0.207133	0.0531393	0.101306	0.16732	-0.0724313	0.644239	-0.0242503
LUAD	PPAT	4.74173e-08	-0.240265	0.870827	-0.00726107	0.461648	-0.0328628	0.12821	-0.0678499	0.0179804	0.105359	0.0572012	0.0847695	2.64962e-05	0.185983	0.688913	0.0178751	0.0869885	0.0763146	0.000689311	-0.150682	0.129743	-0.0675792	0.907216	0.0052045	0.353362	0.0414254	0.424836	0.0356256	0.280289	-0.048184	4.44119e-08	0.240761	0.165349	-0.0618899	NA	NA	0.626798	0.0217101	0.299808	0.0462749	0.53272	0.0278526	0.0288962	-0.0973337
LUSC	PPAT	0.00259102	-0.138654	0.0115029	0.116477	0.0970149	-0.0766385	0.521767	-0.0296222	0.00122374	0.148706	0.125998	-0.070677	0.000723735	0.155393	0.042282	0.0937141	0.826682	0.0101265	0.117842	-0.0722352	0.722692	0.0164112	0.713461	0.0169822	0.0280379	-0.101338	0.0594635	0.0870038	0.410315	-0.0380654	0.0199007	0.107368	0.767941	-0.0136462	0.898407	0.00590485	0.226834	0.0558516	0.836976	0.00951628	0.680272	-0.0190574	0.00353128	-0.13431
PAAD	PPAT	0.167511	-0.1045	0.17526	0.102636	0.856715	0.0137071	0.946759	0.0050696	0.0212663	0.173529	0.223772	-0.092163	0.0656134	0.139091	0.166838	0.104664	0.620802	0.0375449	0.306441	0.0775266	0.421613	-0.0609536	0.0241506	0.169929	0.0533739	-0.145881	0.753686	0.0238186	0.959224	0.00388154	0.0326041	0.161171	0.0227214	0.171664	0.770705	-0.0221241	0.163401	-0.105514	0.385111	-0.0658651	0.687014	-0.0305814	0.00389507	-0.216536
PRAD	PPAT	0.00301835	-0.135526	3.55235e-07	0.23058	0.317078	-0.0459051	0.000371295	0.162331	0.246627	0.0531497	0.48916	0.0317436	1.58979e-09	0.271817	0.221883	0.0560334	0.601008	-0.0240038	0.896648	0.00596315	0.580306	0.0253798	0.0206244	0.105966	0.000294533	-0.165046	0.253828	-0.052349	0.000330703	-0.163693	0.0288659	0.10007	0.00740988	0.122469	NA	NA	4.01685e-05	-0.186856	0.468581	0.0332639	0.126384	0.0700839	0.00118062	-0.14808
READ	PPAT	0.436962	0.0624766	0.047444	0.158471	0.020302	0.185089	0.510719	-0.0528774	0.228686	-0.0966169	0.140964	0.118027	0.472543	0.057744	0.00533256	-0.221368	0.727181	-0.0280623	0.328507	0.0784899	0.0251888	-0.178639	0.157412	-0.113378	0.209653	-0.100672	0.350752	-0.0749662	0.697831	0.0312277	0.0363056	0.167236	0.718899	0.028951	NA	NA	0.0134976	-0.196797	0.380333	0.070491	0.910859	-0.00900676	0.000441141	-0.277161
STAD	PPAT	4.29272e-05	-0.211002	0.942208	-0.00378164	0.205065	-0.0660328	0.055209	-0.0997607	0.0022048	0.15867	0.000119029	0.198728	0.00148955	0.164579	0.478201	0.036982	0.00244741	0.157063	1.15098e-07	-0.271323	1.49492e-08	-0.289033	0.014258	0.127318	1.14318e-06	-0.249757	1.00031e-09	0.310764	0.0380126	-0.107909	2.45193e-11	0.337959	0.961348	0.002528	0.884849	-0.00755457	0.050047	-0.101952	3.06093e-07	0.262369	0.0682582	0.0948958	1.21484e-10	-0.326554
THCA	PPAT	0.0379615	-0.0933088	9.19014e-08	0.23727	9.07645e-05	0.175006	0.372812	-0.0401427	0.00076273	0.150805	0.192589	0.0586615	0.0800585	-0.0787491	0.0824148	0.0781435	0.252382	0.0515413	0.561161	0.026181	0.75366	0.0141401	0.58763	-0.0244315	0.0780645	-0.079273	0.157892	0.0635701	0.0075464	-0.119954	0.0587003	-0.0850296	0.222265	0.0549561	NA	NA	0.000126442	-0.17145	0.0466581	-0.0894633	0.339058	-0.0430592	0.664055	-0.0195689
UCEC	PPAT	0.686449	-0.0176418	0.00395853	0.125439	6.37954e-07	0.215076	0.0138507	-0.107255	0.0325082	0.0932445	0.255845	-0.0496311	0.00212226	0.133687	2.40144e-06	0.203961	0.993832	-0.000337866	0.662894	-0.0190506	0.00685455	-0.117762	0.642116	-0.02031	0.180415	-0.0584932	0.513319	-0.0285639	0.0706757	-0.078878	8.31257e-05	0.170728	0.618158	0.0217832	NA	NA	0.000105306	-0.168283	3.67904e-10	0.26885	5.49622e-05	0.174925	1.81236e-35	-0.505511
BLCA	RRM1	0.281124	-0.0542243	0.016652	-0.12011	0.617688	-0.0251259	0.534979	-0.0312291	0.279119	0.0544505	0.00127099	0.16118	0.00153663	0.158475	0.206861	-0.0634864	0.0957217	0.0837292	0.0232172	-0.113908	0.0158474	-0.121012	0.0592965	0.0947408	0.0751525	-0.0894151	1.68315e-05	0.214138	0.00341764	-0.146592	1.62929e-07	0.259166	0.618799	0.0250465	0.0183865	-0.118289	0.486892	0.0349937	0.00820925	0.132498	0.353912	0.046648	1.342e-11	-0.33091
BRCA	RRM1	0.000120572	-0.128529	0.0127741	0.0834369	0.230519	0.0402316	0.235798	-0.0397801	0.235263	0.0398255	0.313194	0.0338443	0.0355289	0.0704799	0.00437872	0.0954317	0.0257709	0.0747384	0.202683	-0.0427433	0.51166	-0.022026	0.00564367	0.0927072	1.28702e-08	-0.189196	0.000530749	0.11591	0.224071	-0.0407932	0.000975336	0.110351	0.00155441	0.105919	0.123936	0.0516075	6.49188e-09	-0.192976	0.228533	0.0404034	0.348457	0.0314644	1.75011e-07	-0.174019
CESC	RRM1	0.228681	-0.0770274	0.0546484	0.122682	0.598806	-0.0337062	0.000160146	0.238406	0.587962	0.0347098	0.298135	-0.0666016	0.149038	0.0922719	0.652403	-0.0288591	0.613402	0.0323683	0.0588923	0.120612	0.0104824	0.162926	0.448797	-0.0485101	0.217919	-0.0788337	0.734719	0.0217126	0.0737674	-0.114211	0.237908	0.075526	0.000284754	0.229438	NA	NA	0.212398	-0.0797852	0.0878289	-0.109063	0.427617	-0.0508035	0.0108623	-0.162147
CHOL	RRM1	0.901511	0.0217039	0.696924	-0.0682347	0.685442	-0.0709562	0.324378	0.171572	0.496441	-0.118866	0.798828	0.044681	0.931904	-0.014987	0.11591	0.270588	0.62863	-0.084681	0.743778	0.0572834	0.443754	0.133729	0.0697602	0.310186	0.530555	-0.109672	0.698217	-0.0679293	0.495517	-0.11912	0.686407	-0.0707268	0.441266	0.134454	0.139767	-0.254713	0.131539	-0.259944	0.626669	0.0851635	0.419435	0.14091	0.206006	-0.219109
COAD	RRM1	0.98938	0.000640037	0.0168337	0.114559	0.0377635	0.099643	0.000405411	-0.168831	0.00495204	-0.13451	0.101838	0.0785453	0.299907	0.0498152	0.0304535	-0.103781	NA	NA	0.469041	-0.0348047	0.819104	0.0109965	0.0320969	-0.102782	0.0250005	-0.107465	0.00551737	0.132851	0.00054103	-0.165208	0.0917414	0.0809513	0.260024	0.0541198	0.0978124	0.0794808	0.215885	-0.0594543	0.589783	0.0259205	0.0323365	0.10264	0.0126796	-0.119429
ESCA	RRM1	0.0597064	-0.211462	0.250548	0.129964	0.304759	0.116181	0.0745119	0.200522	0.514253	0.0739859	0.310662	0.114781	0.707559	-0.0425928	0.449204	-0.0858005	0.839485	0.0230051	0.268155	-0.125286	0.647779	0.0518592	0.564594	-0.065362	0.843582	0.0224103	0.820086	0.0258303	0.846622	0.0219693	0.136321	0.168004	0.181022	0.151067	0.59151	-0.0609019	0.00472915	-0.312793	0.762292	-0.034348	0.780027	-0.0317161	0.549255	-0.0679485
HNSC	RRM1	0.000278831	-0.163489	0.130354	0.0684319	0.740241	-0.0150147	0.979439	0.00116724	0.336927	-0.0434704	0.204124	-0.0574671	0.000817873	0.150708	0.110137	-0.0722613	0.300529	-0.046864	0.84184	0.00903722	0.897624	0.00582725	0.0107357	-0.115161	0.667502	-0.0194543	0.341066	0.0430998	0.23027	-0.054294	0.0101372	0.116055	0.0207086	0.104483	0.565913	-0.0259963	0.248814	-0.0521957	0.928356	-0.00407226	0.635232	0.0214825	0.0831273	-0.0783606
KIRC	RRM1	0.180931	-0.0594534	0.0447254	0.0890987	0.930318	-0.00388932	0.00175722	0.138475	0.957394	0.00237617	0.596224	-0.0235625	0.0135733	0.109456	1.58807e-10	0.278845	0.296556	0.0464026	0.0587973	0.0839009	0.00618862	0.121312	2.21857e-08	0.245006	1.0861e-06	-0.214319	0.423568	-0.0355816	0.04661	-0.0883293	0.618808	0.0221266	0.00181301	0.138072	NA	NA	6.69612e-05	-0.175939	5.91647e-06	-0.199427	0.401223	0.037323	1.87413e-13	-0.318672
LIHC	RRM1	0.426207	0.0417739	0.490527	0.0362009	0.291269	0.0553867	0.108243	0.0842086	0.00807759	0.138452	0.00406222	0.150057	0.384917	0.0456116	0.57601	-0.0293655	0.304954	-0.0538421	0.790654	0.013942	0.215306	-0.0650122	0.0530959	0.101324	0.882715	-0.00774848	0.905847	0.0062122	0.398564	-0.0443171	0.129578	0.0794861	0.0407307	-0.107165	0.144096	0.0766073	0.00353271	-0.15232	0.000434074	0.183231	0.11044	-0.0836903	0.159444	-0.0737954
LUAD	RRM1	6.2109e-06	-0.199759	0.460774	0.032927	0.745811	-0.0144748	0.781939	-0.0123596	0.0138343	0.109587	0.0529405	0.0862633	5.14446e-05	0.179336	0.392771	0.0381479	0.485864	0.0311123	0.224322	-0.0542203	0.862112	0.00775574	0.550753	0.0266375	0.537224	0.0275473	0.435129	0.0348397	0.026526	-0.0988198	0.00468563	0.125776	0.79184	-0.0117849	NA	NA	0.200214	-0.057153	0.949473	0.00282968	0.663152	-0.0194481	0.144354	-0.0651159
LUSC	RRM1	1.25704e-05	-0.19995	0.0184936	0.108623	0.03823	-0.0956273	0.00542016	0.128088	0.506329	0.0307287	0.269786	0.0510059	0.176596	0.0624368	8.53539e-06	0.203709	0.505883	-0.0307609	0.974795	0.00146125	0.857339	-0.0083138	0.0031497	-0.135929	0.738494	-0.0154394	0.119667	0.0718795	0.0220374	-0.105603	0.402107	0.0387364	0.729223	0.0160088	0.775222	-0.0132061	0.0464373	-0.0919065	0.00467792	-0.130256	0.0466387	-0.0918224	0.00376418	-0.133399
PAAD	RRM1	0.190787	-0.0990765	0.45836	0.056253	0.357566	0.0697611	0.416637	0.0616079	0.0394873	0.155372	0.143442	-0.110734	0.0802843	0.132201	0.157389	0.107033	0.833445	0.0159636	0.0222107	0.172306	0.79819	-0.0194099	0.0415026	0.153836	0.487181	-0.0527117	0.580462	-0.0419426	0.259995	0.085359	0.339762	0.0723797	0.23003	0.090935	0.74989	-0.0241982	0.190141	-0.0992202	0.96258	-0.00356181	0.833842	0.015925	0.00145344	-0.238223
PRAD	RRM1	0.161548	-0.0641986	0.0043946	0.130203	0.248396	0.0529516	5.15984e-05	0.184251	0.617741	0.0229072	0.913351	0.00499524	3.41042e-05	0.188539	0.0399952	0.0940752	0.500068	-0.0309517	0.530048	0.0288207	0.912992	-0.00501603	0.0279787	0.100629	0.00285998	-0.136275	0.759877	0.0140305	0.000165523	-0.171627	0.10092	0.0752001	0.0222957	0.104624	NA	NA	8.69775e-06	-0.202052	0.705776	0.0173303	0.390494	0.0394063	0.00319547	-0.13473
READ	RRM1	0.930459	0.00702066	0.0666072	0.146773	0.00375819	0.229997	0.326222	-0.0788605	0.0195717	-0.186166	0.210859	0.100407	0.62442	0.0393734	0.0710856	-0.144447	0.951167	-0.00492698	0.55325	0.0476724	0.00251016	-0.239583	0.132725	-0.120513	0.164272	-0.111546	0.0517405	-0.155547	0.158988	0.112952	0.123378	0.123481	0.271541	0.0882853	NA	NA	0.0045403	-0.225373	0.211326	0.100305	0.611902	0.040801	0.0309557	-0.172286
STAD	RRM1	0.0151339	-0.126208	0.796652	0.0134411	0.392475	-0.0445852	0.261636	-0.0585057	0.0631154	0.0967131	5.21121e-05	0.208724	0.0520982	0.10106	0.901853	0.00643288	0.0371206	0.108412	0.000578216	-0.178092	7.98912e-08	-0.274584	0.0213254	0.119659	3.11387e-06	-0.239694	3.30093e-07	0.261664	0.140594	-0.0767546	9.93045e-06	0.227468	0.158412	0.0734743	0.884849	0.00755456	0.0136775	-0.128087	3.19007e-06	0.239446	0.508417	0.0344861	6.5271e-06	-0.231969
THCA	RRM1	0.00511369	-0.125659	1.69146e-09	0.266561	1.48603e-09	0.267452	0.0049334	0.126174	0.559588	-0.0262862	0.0211206	0.103622	0.568806	-0.0256717	0.127591	0.0685766	0.950484	-0.00279822	0.448525	0.0341404	0.0202234	-0.104353	0.186147	0.0595201	0.00104674	-0.146891	0.634928	0.0213924	0.0562667	-0.0858601	0.508908	-0.0297577	0.285596	0.0480893	NA	NA	1.19169e-06	-0.216265	0.0254779	-0.100414	0.740822	-0.0149036	0.471189	0.0324597
UCEC	RRM1	0.103174	-0.0711357	0.427284	0.0346855	0.00235087	0.132364	0.299123	-0.0453573	0.0216745	0.100098	0.286839	0.0465253	0.00270013	0.130555	0.000101314	0.168685	0.191222	0.057076	0.147222	-0.0632846	0.00304809	-0.128953	0.692992	-0.0172538	0.247371	-0.050525	0.365841	-0.0395076	0.481795	-0.0307364	3.41467e-05	0.179638	0.308553	-0.0444822	NA	NA	0.0348145	-0.0920461	1.39545e-10	0.27501	0.000594857	0.149243	1.85438e-28	-0.456659
BLCA	RRM2	0.253664	-0.0574238	0.00190938	-0.155327	0.851308	-0.00943739	0.059773	-0.0945646	0.698218	0.0195191	0.000167812	0.187775	0.00364073	0.145615	0.0482368	-0.0992044	0.242575	0.0587837	0.000616598	-0.171126	0.00313121	-0.147935	0.00453191	0.142187	0.0367396	-0.104868	1.45481e-05	0.215702	0.0177294	-0.11896	3.23918e-09	0.291509	0.104347	-0.0816343	0.128439	-0.0764303	0.0566978	0.0957231	0.0026482	0.150475	0.508812	0.0332547	1.62314e-16	-0.397945
BRCA	RRM2	0.0237251	-0.0758048	0.147237	-0.0486223	0.00239895	0.10164	0.00161889	-0.105525	0.159733	0.0471683	7.94428e-06	0.149095	1.08974e-08	0.190122	0.648828	-0.0152853	0.571731	0.0189807	3.53628e-23	-0.323851	3.7698e-05	-0.137677	0.864709	0.00571924	3.82363e-06	-0.154177	0.000476014	0.116879	0.0909164	-0.0567026	8.95962e-23	0.320969	0.0755651	-0.0595966	0.74822	-0.0107744	0.00419954	-0.0958739	9.41747e-06	0.147889	0.0185619	0.0789013	0.53602	0.0207706
CESC	RRM2	0.669439	-0.0273535	0.175184	0.0867172	0.392758	0.0547269	0.110259	0.102077	0.656609	0.028486	0.823506	-0.0142925	0.00621569	0.174006	0.708412	0.0239633	0.114785	0.100806	0.260921	-0.0719509	0.19192	0.0834785	0.525151	-0.0407038	0.430916	-0.0504421	0.887113	0.00909705	0.00276474	-0.190037	0.482881	0.0449436	0.317964	0.0639321	NA	NA	0.804524	-0.0158596	0.674054	0.0269482	0.154101	-0.091142	0.00126929	-0.204349
CHOL	RRM2	0.130186	-0.260827	0.483023	0.12257	0.934422	0.0144318	0.505581	-0.116373	0.0926037	0.288675	0.357835	0.160235	0.192458	0.225646	0.819289	-0.040056	0.27116	0.191223	0.155795	-0.245139	0.0584625	-0.322941	0.715022	0.0639768	0.0415984	-0.346243	0.0965276	0.285405	0.425839	0.138997	0.29216	0.183197	0.113575	-0.272269	0.771339	-0.0509427	0.73713	0.0588235	0.381002	0.152756	0.29107	0.183604	0.0713833	-0.30849
COAD	RRM2	0.111341	-0.076448	0.03477	0.101247	0.00172969	0.149803	0.000998033	-0.157265	0.0397031	-0.0986604	0.688002	-0.0193075	0.0149117	0.116663	0.0354167	-0.100891	NA	NA	0.128811	-0.072934	0.723385	-0.0170178	0.799636	-0.0122043	0.472829	-0.034509	0.00254096	0.144379	0.00174104	-0.149713	0.00292694	0.142338	0.326768	0.0471278	0.237326	0.0567757	0.945824	0.00326741	0.041171	0.0979434	0.0106512	0.122344	8.96984e-05	-0.186684
ESCA	RRM2	0.540971	-0.0693596	0.797954	-0.0290728	0.0130823	0.276366	0.181763	-0.150814	0.632455	0.0542877	0.0863948	0.192943	0.296508	-0.118168	0.212725	-0.14084	0.0782015	0.198072	0.0662041	-0.206418	0.176706	0.152558	0.367203	-0.10216	0.367223	0.102155	0.755615	-0.0353435	0.239594	0.132989	0.396645	0.0960601	0.30784	0.115448	0.715306	0.0414133	0.0216756	-0.256429	0.632641	-0.0542581	0.809971	-0.0273094	0.0419741	-0.227968
HNSC	RRM2	0.00954532	-0.116986	0.06865	0.0823222	0.801349	0.0113949	0.00130905	-0.144797	0.918574	-0.00463011	0.00250785	-0.136249	1.29192e-05	0.195624	0.487944	-0.0314054	0.911944	0.00500854	0.319042	-0.0451063	0.362415	0.0412323	0.0472302	-0.0896867	0.137254	-0.0672307	9.79621e-05	0.175071	0.182956	-0.0602597	1.51687e-06	0.215247	0.18427	0.0600796	0.896837	0.0058723	0.160191	0.0635438	0.779699	-0.0126679	0.585759	0.0246795	0.00328838	-0.132541
KIRC	RRM2	0.899177	0.00563528	0.00225306	-0.135239	2.04676e-08	-0.245599	0.265258	0.0495196	0.722695	-0.0157822	0.000147848	0.167581	0.0304695	0.0960236	0.69713	-0.0173092	0.284506	-0.047575	1.0613e-10	-0.281408	3.99305e-05	-0.181193	0.00716158	0.119184	0.000537207	-0.15305	1.25868e-06	-0.213065	0.00834629	0.116917	1.21977e-08	0.249371	6.51246e-07	-0.218609	NA	NA	3.46281e-05	0.182616	0.000176707	0.165645	2.02201e-07	0.228108	0.00101241	0.145422
LIHC	RRM2	0.332347	0.0508822	0.230564	-0.0629073	0.94979	0.00330738	0.0118033	0.131674	0.0726769	0.0940612	9.95749e-11	0.330125	0.856585	-0.00949183	0.00203396	-0.160986	0.21368	-0.0652427	0.00108324	-0.170385	1.40287e-06	-0.249385	0.17454	0.0712224	0.0728984	-0.0939888	0.071713	-0.0943785	0.31323	0.0529302	4.2696e-06	0.238009	1.07453e-05	-0.228128	0.138944	0.0776022	0.599458	-0.0275785	1.75137e-07	0.269291	0.964485	-0.00233862	0.00211079	0.160417
LUAD	RRM2	7.15701e-11	-0.284972	0.796225	0.011531	0.0407594	-0.0911712	2.16851e-05	-0.187946	0.00632802	0.121467	3.39969e-07	0.224808	1.42848e-11	0.294906	0.93515	-0.00363341	0.0051523	0.124428	7.50807e-10	-0.269737	0.00148552	-0.141178	0.154008	0.0635912	0.138979	0.0659988	0.0605534	0.0836579	0.0404706	-0.0913018	1.12144e-11	0.296365	4.14992e-07	-0.223181	NA	NA	0.136148	0.0664744	0.0280804	0.097833	0.376923	0.0394404	0.136589	-0.0663998
LUSC	RRM2	0.000208063	-0.170287	0.157403	0.0653207	0.94169	0.00338299	0.0616807	0.0862603	0.0030841	0.136225	0.084797	-0.0795852	0.00114288	0.149592	0.00525093	0.128557	0.882265	-0.00684946	0.0658932	-0.0849065	0.923377	0.00444832	0.46558	0.0337383	0.806669	-0.0113181	0.259426	0.0521226	0.100201	-0.0759193	0.00536939	0.128227	0.0808062	-0.0806218	0.412088	0.0379215	0.103316	0.0752333	0.681505	0.0189796	0.300679	-0.0478401	0.000553399	-0.158709
PAAD	RRM2	0.541323	-0.0463473	0.816129	-0.0176518	0.240824	0.0888712	0.84701	-0.0146466	0.244482	0.0881864	0.0553498	0.144703	0.0287139	0.164925	0.464631	-0.0554722	0.669675	-0.032378	0.828324	0.016462	0.000420346	-0.263033	0.315415	0.0761062	0.755881	-0.0235994	0.764935	0.0226973	0.0136333	0.185644	0.889181	-0.0105783	0.383378	-0.0661051	0.460719	0.0559587	0.0139979	-0.184944	0.110928	0.120575	0.637054	-0.0358086	0.72599	-0.0266022
PRAD	RRM2	0.0608446	0.0858998	0.460113	0.0339001	0.316587	0.0459517	0.0049889	0.128363	0.136892	0.068206	0.0570977	0.0871752	3.06007e-05	0.189646	1.50147e-05	0.196763	0.133644	-0.0687741	0.0626872	-0.0852962	0.709539	-0.0170981	0.713405	0.01686	0.50564	-0.0305507	0.40447	-0.0382572	4.28714e-09	-0.264774	0.00866107	0.120077	0.433165	0.0359699	NA	NA	0.000133429	-0.174028	0.383762	0.0399686	0.804064	0.0113888	0.160437	0.0643689
READ	RRM2	0.635346	0.0381376	0.242445	0.093832	0.000284756	0.285827	0.0953689	-0.13357	0.193699	-0.104279	0.69319	0.0317325	0.915245	-0.00856188	0.0566529	-0.152442	0.335605	0.0773495	0.408291	-0.0664522	0.0629372	-0.148777	0.373906	-0.0714446	0.112239	-0.127254	0.724437	-0.0283563	0.118813	0.124994	0.0268897	0.176646	0.235291	0.0952658	NA	NA	0.00482237	-0.22388	0.544975	0.048669	0.235249	0.0952743	0.00418215	-0.227394
STAD	RRM2	0.000268641	-0.188371	0.0533541	-0.100528	0.970711	-0.0019153	0.0153371	-0.125958	0.8325	0.0110322	1.79459e-07	0.267298	0.00431358	0.148069	0.8689	-0.00860982	0.000153891	0.195517	7.89091e-11	-0.329676	1.21565e-11	-0.342814	0.0035272	0.151317	0.00585899	-0.143002	8.01058e-08	0.27456	0.544724	-0.0315871	3.86392e-11	0.334765	0.208712	-0.0655057	0.161902	-0.0728649	0.0778551	-0.091785	1.0358e-09	0.310495	0.726344	0.0182555	2.21913e-06	-0.243145
THCA	RRM2	0.328853	0.0439771	2.71648e-05	0.187397	0.156292	0.0638151	0.00323892	0.132081	7.24877e-07	-0.220502	0.000841883	0.149594	8.74971e-07	0.218908	5.19688e-06	-0.203181	0.343724	-0.0426454	7.70161e-05	-0.176743	5.22301e-10	-0.274532	0.109331	0.0720575	5.14546e-05	-0.180939	0.00114109	-0.145807	0.000113164	0.172648	4.81324e-14	0.330053	1.2058e-05	-0.195307	NA	NA	0.14888	-0.0649761	2.33882e-06	0.210377	2.35345e-06	0.210322	0.0253241	0.100519
UCEC	RRM2	0.42448	-0.0348962	0.350039	0.0408269	0.00111239	0.141781	8.13531e-05	-0.170949	0.579029	0.0242447	0.913004	0.00477484	3.40521e-06	0.200929	0.0316019	0.0937353	0.487256	0.0303547	0.277813	-0.0474052	0.000333571	-0.155846	0.758441	-0.0134403	0.741257	-0.0144305	0.990518	0.000519429	0.522519	0.0279431	2.18708e-10	0.272174	0.000647348	-0.148255	NA	NA	0.970272	-0.00162881	1.69136e-12	0.301274	0.00774835	0.115989	6.37922e-31	-0.474737
BLCA	TXN	0.676247	-0.0210222	9.8705e-06	-0.219807	0.670076	-0.0214477	0.0153378	0.121604	0.333676	0.0486437	0.0394673	0.103401	0.00232551	0.152419	0.74541	-0.0163466	0.566311	0.0288678	0.220858	-0.0615791	0.0947866	-0.0839652	0.558185	0.0294739	0.125063	0.077111	0.0131514	0.124358	0.0377	-0.104341	0.000253863	0.182636	0.312438	-0.050824	0.556237	-0.0296199	0.223788	0.0611909	0.0190056	0.117675	0.485364	0.0351165	0.000139426	-0.190032
BRCA	TXN	0.2601	-0.0377884	0.00789573	-0.0889943	0.00874805	0.0878347	0.281135	-0.0361661	0.2463	0.0389026	0.158881	0.0472646	6.43392e-05	0.133544	0.778832	-0.00942685	0.118729	0.0523334	2.39682e-12	-0.232061	0.00120047	-0.108396	0.213298	-0.0417578	0.333607	-0.0324468	0.868164	0.00557182	0.458075	-0.0249037	5.33857e-06	0.151878	0.0175542	-0.0795921	0.230215	0.0402578	0.780465	0.00935542	1.30467e-06	0.161368	0.00924632	0.0872027	0.433966	0.0262593
CESC	TXN	0.253376	-0.0730981	0.633342	-0.0305628	0.00599334	0.174755	0.0304271	0.138044	0.0431045	0.12908	0.332918	-0.0619899	0.287249	-0.0681174	0.790925	0.0169881	0.037684	0.132596	0.811907	-0.015249	0.710151	0.0238137	0.970154	-0.00239769	0.405369	0.0532846	0.239741	-0.0752326	0.091531	-0.107819	0.142329	0.093815	0.544277	-0.0388432	NA	NA	0.073042	-0.114497	0.79874	-0.0163389	0.861175	0.0112066	0.112407	-0.101469
CHOL	TXN	0.819622	-0.0399808	0.513294	-0.114286	0.789043	0.0469033	0.802639	0.0438176	0.202542	0.220752	0.467081	0.12704	0.387931	-0.150571	0.365582	0.157703	0.313043	0.175575	0.404898	-0.145315	1	0	0.0755675	0.304252	0.582402	0.0962252	0.5981	-0.0922622	0.561418	0.101598	0.499831	-0.117939	0.295183	-0.182073	0.169077	-0.237732	0.870577	-0.0285714	0.422468	0.140002	0.921706	0.017238	0.933795	0.0145699
COAD	TXN	0.688013	0.0193067	0.217575	0.0592365	0.0371136	0.0999819	0.022712	-0.109221	0.0319851	-0.102849	0.668314	0.0206003	0.763756	0.0144512	0.000106669	-0.184717	NA	NA	0.497588	-0.0326067	0.233367	0.057257	0.00224234	-0.146162	0.582658	-0.0264182	0.0286291	0.104945	0.00279473	-0.143008	0.0914096	0.0810338	0.820146	0.0109321	0.124411	0.0737824	0.86655	0.0080801	0.116276	0.0754142	0.00455935	0.135766	0.19863	-0.0617522
ESCA	TXN	0.0420568	-0.227878	0.150267	-0.162325	0.363093	0.103034	0.0541748	0.21612	0.0814213	0.196008	0.755549	0.0353534	0.121144	-0.174708	0.0211592	0.257413	0.175664	0.152922	0.265375	-0.12601	0.600998	0.0593518	0.88547	0.0163604	0.703037	0.0432834	0.544977	0.068676	0.363068	0.10304	0.260046	0.127413	0.641296	-0.0528836	0.378051	0.0998792	0.63355	0.0541133	0.184739	-0.149805	0.383051	-0.0988414	0.205961	-0.142926
HNSC	TXN	0.103898	0.0735544	0.0148119	-0.110036	0.00604082	0.12387	0.103433	0.0736533	0.201237	0.0578352	0.0223533	-0.103183	0.0104363	0.115603	0.591891	0.0242769	0.67799	0.0188035	0.515537	-0.0294437	0.466796	0.0329495	0.861344	0.00791056	0.0170399	0.107743	0.563331	-0.0261693	0.45607	-0.0337473	0.106684	0.0729697	0.00230553	-0.137381	0.814662	-0.0106167	0.015344	0.109462	0.403865	0.0377927	0.707982	-0.0169633	0.42715	-0.035953
KIRC	TXN	0.817532	-0.0102616	0.00249042	-0.133916	0.371792	0.0397081	0.00330849	0.130098	0.527532	-0.0280943	0.109691	-0.0710553	0.252294	0.0508845	0.00351028	-0.129289	0.0757399	-0.0788669	0.513069	0.029085	0.0902128	-0.0752501	0.173722	-0.0604491	2.06616e-05	0.187682	0.00367499	-0.12866	0.803972	-0.0110394	0.266946	-0.0493453	0.00205243	-0.136461	NA	NA	0.000231736	0.162658	0.0215762	0.101931	0.00147014	0.140756	0.405892	0.0369546
LIHC	TXN	0.423201	-0.0420456	0.064603	-0.0968332	0.474042	0.0375886	0.365624	0.0474904	0.00945826	0.135667	0.0119009	0.131524	0.543845	0.0318736	0.488204	0.0363949	0.160948	-0.0735311	0.166637	-0.0725478	0.174783	-0.0711823	0.94228	-0.00380288	0.149806	0.0755357	0.748092	-0.0168668	0.259197	-0.0592087	0.18581	0.0694076	0.152689	-0.0750065	0.251361	0.0601914	0.545541	-0.0317395	0.994647	-0.000352385	0.535569	0.0325305	0.0179589	0.123814
LUAD	TXN	0.00414468	-0.127498	0.620455	0.0221104	0.39732	0.0377827	0.524382	-0.0284215	0.00603496	0.122156	0.468893	-0.0323339	0.011002	0.113175	0.507508	0.029587	0.775067	0.0127597	0.118194	-0.0696832	0.689145	0.017861	0.135655	-0.0665579	2.54911e-07	0.227137	0.821167	-0.0100936	0.8472	-0.00860442	0.0909082	0.0753865	0.00108952	-0.145084	NA	NA	0.0916613	0.0752118	0.000564473	0.153066	0.754488	-0.0139639	0.558876	-0.0260966
LUSC	TXN	0.000539903	-0.159011	0.351778	0.0430452	0.753263	-0.0145373	3.52374e-07	0.232321	0.000396235	0.16275	0.0634777	-0.0856738	0.174352	0.0627614	3.40283e-05	0.189943	0.759815	0.0141389	0.591163	-0.0248393	0.612466	0.0234249	0.0181077	-0.108981	0.619763	-0.0229454	0.136023	0.0688657	0.0304672	-0.0998325	8.14157e-05	0.18073	2.6951e-06	-0.214508	0.870836	-0.00751994	0.367941	0.0416223	0.864623	0.00788508	0.0808833	0.0806013	6.18429e-05	-0.183682
PAAD	TXN	0.0911057	-0.127746	0.552655	-0.0450567	0.642104	0.035273	0.427294	0.0602119	0.0960978	0.125832	0.0549078	0.144963	0.0395963	0.155287	0.969066	-0.00294409	0.405129	-0.063139	0.123166	0.116638	0.055042	-0.144884	0.829746	0.0163236	0.603859	0.0393759	0.630242	-0.0365341	0.0880457	0.128961	0.463642	-0.0555951	0.374583	-0.0673334	0.29274	-0.0797491	0.0913111	-0.127665	0.907363	-0.00883415	0.835029	-0.0158096	0.984396	0.00148484
PRAD	TXN	0.554745	-0.0271109	0.0449094	-0.0918724	0.190359	-0.0600622	0.00040866	-0.161194	0.815842	0.0106913	0.388303	0.0395886	0.438153	0.0355814	0.00220463	0.13984	0.00106301	-0.149424	0.509733	-0.0302576	0.00429123	-0.130546	0.000641164	-0.155751	0.00175926	0.142866	0.0469866	-0.0910019	0.389014	0.0395294	0.575096	-0.0257296	0.00544123	-0.12709	NA	NA	0.458519	0.0340206	0.228682	-0.0552192	0.746134	0.0148612	4.84298e-05	0.184914
READ	TXN	0.043651	0.161242	0.776023	0.0228859	0.00430833	0.226665	0.746701	-0.0259808	0.186879	-0.105887	0.0408082	0.163453	0.699907	0.0310022	0.0677265	-0.14618	0.7238	-0.0284247	0.337522	0.0770442	0.0251021	-0.178744	0.0279566	-0.17545	0.77634	-0.0228526	0.174881	-0.108823	0.924628	0.00761108	0.626923	0.0390896	0.831391	0.0171283	NA	NA	0.00715108	-0.213883	0.131308	0.120953	0.0559123	0.152895	0.0205488	-0.184733
STAD	TXN	0.177005	-0.0703361	0.509403	-0.034406	0.886034	-0.00747625	0.653755	0.0233951	0.930229	0.00456726	0.00116452	0.168191	0.111271	0.0829283	0.632657	-0.02493	0.0203633	0.120557	0.00152304	-0.164249	3.82054e-05	-0.21236	0.0748884	0.0927116	0.597753	-0.0275183	0.0438034	0.104871	0.196737	-0.0672625	0.0105267	0.132845	0.392634	-0.0445703	0.229437	-0.0626297	0.588799	-0.0281931	0.0199332	0.120971	0.465187	-0.0380833	0.0578187	-0.098717
THCA	TXN	0.140293	0.0663776	0.069219	-0.0817375	0.0375902	0.093489	0.000253341	0.163756	5.93861e-05	-0.179458	0.000195531	0.166663	0.68942	-0.0180067	0.570475	0.025561	0.53139	-0.0281971	0.577506	-0.0250962	0.00151597	-0.142188	0.412685	0.0369001	0.0237161	-0.101649	0.214813	-0.0558513	0.0800429	0.0787532	0.15133	0.0645876	0.00190392	-0.139223	NA	NA	0.28808	-0.0478423	0.129708	-0.0681987	0.942208	0.00326667	0.0291496	0.0980607
UCEC	TXN	0.741115	-0.0144387	0.0104302	-0.111591	0.995174	0.000264349	0.499947	0.0294765	0.339687	0.0417117	0.133413	-0.0655227	0.649047	0.019888	3.79269e-05	0.178609	0.325995	-0.0429089	0.402038	0.0366128	0.719936	-0.0156696	0.0686884	0.0794395	0.313819	0.0440012	0.0798712	-0.0764362	0.000201054	0.161419	0.0325948	0.0931982	0.907604	-0.00507252	NA	NA	0.886285	0.0062502	0.0873049	0.0746239	0.00264823	0.13081	4.29291e-07	-0.218285
BLCA	TYMP	0.262538	-0.0563649	7.09038e-06	-0.223248	2.0201e-05	-0.212165	0.241389	-0.0589317	0.322775	-0.0497511	0.00664534	0.136013	4.86789e-30	0.529251	0.0447665	0.100782	0.967264	0.00206625	0.192892	-0.0654855	0.000345097	-0.178733	0.00236232	0.152185	0.836283	0.010404	0.00228265	0.152696	0.0537379	-0.0968885	1.25165e-31	0.541523	0.0319749	-0.107667	1.79118e-07	-0.258329	0.000100813	0.19392	0.874637	0.00794324	0.117294	0.0787332	3.39777e-12	-0.339938
BRCA	TYMP	0.000243721	0.122685	2.77117e-09	-0.197574	0.986382	0.000572952	0.146266	-0.0487391	0.134234	-0.050239	0.0584362	0.063459	1.38039e-12	0.234532	0.00680871	-0.0906479	0.477525	-0.023839	1.20367e-08	-0.189569	0.156776	-0.0475043	0.0598383	0.06311	0.345124	-0.0316825	0.46281	0.0246423	0.000295912	-0.121028	3.4276e-17	0.277431	0.000867977	-0.111436	0.708733	-0.0125388	4.35978e-06	0.153277	0.000353654	0.119488	0.0508054	0.0654905	2.88097e-20	0.302327
CESC	TYMP	0.233001	0.0763192	0.10699	-0.10302	0.37987	-0.05623	0.166112	0.0885694	0.00583559	-0.175302	0.0863956	-0.109556	1.39856e-13	0.44857	0.424321	0.0511663	0.232983	-0.0763222	0.917682	-0.00662328	0.491616	-0.0440518	0.294588	-0.0670914	0.334115	0.0618369	0.542168	0.0390468	0.0545007	-0.122757	0.000153926	0.239011	0.000363259	-0.225536	NA	NA	0.000738012	0.213781	0.0494945	0.125384	0.681587	0.0262891	0.188409	0.0841403
CHOL	TYMP	0.917003	-0.0182769	0.632141	-0.0838191	0.3798	-0.153137	0.520355	0.112389	0.282634	-0.18679	0.151253	0.247776	0.535319	0.108411	0.042861	-0.344258	0.773735	-0.0503944	0.248163	-0.200492	0.0141422	-0.411146	0.1668	0.238972	0.939526	0.0133063	0.271435	-0.191115	0.68972	-0.0699404	0.792496	-0.0461182	0.0495578	-0.334454	0.627721	0.0849045	0.98471	-0.00336134	0.0911378	0.289924	0.0625661	0.3181	0.208994	0.217708
COAD	TYMP	0.93257	0.00406851	2.38762e-05	-0.201087	0.0864657	-0.0822938	0.017369	-0.114011	0.00305081	-0.141735	0.00341253	0.140093	4.85942e-26	0.4765	0.0396176	0.0987028	NA	NA	0.0242431	0.10803	1.9184e-08	-0.265339	0.00177527	0.149442	0.228871	0.0578105	0.996376	-0.0002184	0.00285613	-0.142693	0.063888	0.0889225	4.58111e-20	-0.420487	0.874115	-0.00761812	6.99789e-05	0.189467	0.00491155	0.134635	0.246335	0.0557011	0.674379	-0.0202005
ESCA	TYMP	0.0730339	0.201531	0.00184111	-0.343007	0.440793	0.0873946	0.0112791	-0.281966	0.130445	-0.170529	0.150863	0.162091	0.00236096	0.335328	0.652895	-0.0510536	0.569027	0.0646208	0.0236623	-0.252817	0.000416602	-0.385304	0.640651	-0.0529859	0.722772	-0.0402809	0.0591023	0.211953	0.0268493	-0.24753	0.255495	0.128628	0.00742677	-0.297189	0.174094	-0.153473	0.314766	0.113818	0.097186	0.186747	0.453459	0.0850005	0.311491	-0.114586
HNSC	TYMP	0.0223927	0.103152	0.419483	-0.0365521	0.731644	0.0155312	0.011792	0.113687	0.00713205	-0.12141	1.86493e-06	-0.213434	1.88989e-27	0.463363	0.803856	0.0112481	0.0267072	-0.100102	0.528213	0.0285609	0.380506	0.039703	0.188191	0.0595478	0.00571878	0.124673	0.0706798	0.081728	2.69151e-05	-0.188431	1.51447e-08	0.252189	0.0790691	-0.0794106	0.0642268	-0.0836687	3.73148e-07	0.227161	0.0317526	0.0970335	0.625174	0.0221233	0.336506	0.0435083
KIRC	TYMP	0.0445396	0.089176	2.06683e-18	-0.375036	6.43441e-06	-0.19866	0.133934	0.0665873	0.0352878	-0.0934219	0.00370794	-0.128537	8.8887e-05	0.172995	1.18405e-07	-0.232319	0.193288	-0.0578128	3.18245e-14	-0.328216	0.304269	-0.0456687	0.793983	-0.0116145	0.21931	0.0545938	1.31643e-08	-0.248819	0.000406193	0.156306	0.0141365	0.108813	1.08087e-09	-0.266267	NA	NA	2.12868e-19	0.385035	3.07031e-17	0.362697	1.90186e-09	0.262434	1.47054e-09	0.264186
LIHC	TYMP	0.461802	0.038636	0.000120242	-0.199939	0.876662	-0.0081515	0.00584893	0.144004	0.617418	-0.0262312	0.00208033	0.16064	0.00227674	0.15925	0.824884	-0.0116211	0.876815	-0.00814128	0.00408367	-0.149971	0.000944637	-0.172365	0.0051772	0.146054	0.000888624	-0.173242	0.107917	-0.0842863	0.173632	0.0713724	0.0096571	0.135296	0.970616	0.00193473	0.33847	-0.0502424	0.924445	0.00498099	0.124455	0.0805614	0.728684	0.0182173	0.000588372	0.179055
LUAD	TYMP	0.939672	-0.00337956	0.109439	-0.0713879	0.00937817	-0.115621	0.105715	-0.0721458	0.913753	0.00483629	0.00975813	0.115017	1.13867e-07	0.233524	0.687754	0.0179454	0.999677	-1.80919e-05	0.0154289	-0.107844	0.358632	-0.0409744	0.684863	0.0181209	0.440979	0.0343979	0.000188179	0.165604	0.0152191	-0.108064	0.00203784	0.137093	2.10545e-05	-0.188233	NA	NA	0.0206284	0.103087	0.0117551	0.112148	0.450868	-0.0336585	7.35875e-06	0.198198
LUSC	TYMP	0.00892778	0.120493	1.43825e-10	-0.290141	0.842843	-0.0091692	0.0560222	-0.0882045	4.96086e-05	-0.186016	0.046966	0.0916864	1.71801e-06	0.21858	0.478536	-0.0327665	0.884333	-0.00672829	0.0492254	-0.0907684	0.0981321	-0.0763842	0.000300614	0.16602	0.188555	-0.060756	0.0223907	0.105325	0.010602	-0.117782	3.36012e-06	0.212485	0.486913	-0.0321458	0.350483	-0.043161	0.174076	0.0628017	0.0868674	-0.0790629	0.634586	0.021979	0.000255994	0.167896
PAAD	TYMP	0.0896046	0.128338	0.391149	-0.0650341	0.0527285	0.146273	0.771769	-0.0220185	0.994542	-0.000519301	0.000968146	0.246623	0.100334	0.124268	0.687453	0.030536	0.0118265	-0.189376	0.766218	-0.0225698	0.0141947	-0.184573	6.21373e-05	0.297125	0.985891	-0.00134251	0.0219775	-0.172604	0.485975	-0.0528575	0.952552	-0.0045173	6.81715e-06	-0.331853	0.410885	0.0623701	0.997097	-0.000276268	0.159741	0.106434	0.484941	0.0529827	0.0389889	0.155762
PRAD	TYMP	0.000132042	0.174143	1.82645e-08	-0.254099	0.0865228	0.0785649	0.0387768	0.0946565	0.0955209	-0.0764141	0.00599334	0.12566	0.000600726	0.156549	0.301506	-0.0474052	0.839292	-0.00930978	1.1091e-06	-0.220857	0.797293	-0.011791	0.470232	0.0331406	0.202875	-0.0584086	0.185557	0.0607177	4.91006e-10	-0.279904	0.00150968	0.144886	0.0281776	0.100502	NA	NA	5.65835e-05	0.183283	0.279295	0.0496367	0.024348	0.103089	1.89049e-15	0.353069
READ	TYMP	0.765668	0.0239748	0.17349	-0.109173	0.0660837	-0.147054	0.202778	-0.102201	0.99075	0.000932682	2.95741e-05	0.326753	1.40258e-06	0.373972	0.000989409	0.260383	0.945597	-0.00548978	0.375211	0.0712501	3.07522e-05	-0.326096	0.000408449	0.278706	0.0649381	-0.147673	0.595522	-0.0426884	0.0395534	-0.164471	0.209562	0.100691	1.41851e-09	-0.459491	NA	NA	0.761216	-0.0244443	0.30617	0.082186	0.00334531	0.2328	0.784595	-0.0219876
STAD	TYMP	0.818166	0.0119923	7.9174e-06	-0.229909	0.120631	0.0808329	0.973536	-0.00173048	0.0272724	-0.114776	0.791182	0.0138111	1.87635e-11	0.33982	0.415107	-0.0424913	0.21706	-0.0643237	0.998671	-8.69015e-05	0.744777	-0.0169799	0.277826	0.056564	0.96487	-0.00229747	0.0880436	0.088806	0.71777	0.0188526	4.06278e-07	0.259714	4.31533e-08	-0.27999	0.848099	0.00999152	1.10489e-05	0.226308	3.83643e-06	0.237542	0.828941	-0.0112702	0.215831	0.0644956
THCA	TYMP	0.357454	0.0414481	0.226962	0.0544028	0.521544	-0.0288764	3.58676e-09	0.261322	4.7505e-14	-0.330124	0.314991	0.0452539	1.47741e-20	0.401105	2.26456e-07	-0.230105	0.268999	-0.0497778	3.24991e-11	-0.292408	1.30402e-15	-0.348846	0.000104578	0.173495	2.51424e-06	-0.209735	1.14505e-09	-0.269236	5.11595e-20	0.395842	3.13452e-15	0.344395	7.34004e-06	-0.199988	NA	NA	0.00451836	0.127428	3.07054e-07	0.227633	1.38668e-06	0.214956	0.105519	0.0728412
UCEC	TYMP	0.0606001	0.0818724	2.23582e-21	-0.397684	0.0276545	-0.0960249	0.228245	0.0526246	0.0933514	-0.0732393	0.64985	0.0198393	2.61087e-16	0.346788	0.0780406	0.0769034	0.13721	-0.0648902	0.108816	-0.0699983	0.12717	-0.0665932	0.000463176	0.152132	0.386394	0.0378436	0.908217	-0.00503873	3.67421e-06	0.200263	0.00234243	0.132411	7.33928e-09	-0.248767	NA	NA	0.000307011	0.156772	0.972579	0.00150234	0.0033953	0.127513	0.296779	0.0455777
BLCA	UCK2	0.0976511	-0.0832479	0.373038	-0.0448267	0.0247854	-0.112656	0.310032	-0.0510769	0.853443	-0.00930034	1.82083e-05	0.213291	0.0010981	0.163235	0.407988	-0.0416413	0.114187	0.0794055	0.0011428	-0.162677	0.0027652	-0.149823	0.814657	0.0118021	0.285679	-0.0537145	0.00147843	0.159029	0.0287648	-0.109761	6.88626e-05	0.198396	0.095808	-0.0837075	0.681633	-0.0206521	0.287611	0.0534998	0.146652	0.0729796	0.676762	-0.0209867	0.000952037	-0.165219
BRCA	UCK2	0.679733	-0.0138568	0.108596	0.0538209	3.92286e-05	0.137373	0.906207	-0.00395504	0.209396	0.0421158	0.146688	0.0486883	0.162103	0.0469023	0.31164	-0.0339531	0.0387473	0.0692954	3.88956e-11	-0.219119	0.375199	0.0297601	0.998261	7.31415e-05	0.00656429	-0.0910521	0.089967	0.0568696	0.0231752	-0.076105	0.0137928	0.0825222	0.738844	0.0111905	0.388452	0.0289433	0.905765	-0.00397373	1.85907e-06	0.159035	0.00345601	-0.0979136	0.735178	-0.0113536
CESC	UCK2	0.69621	0.0250172	0.512614	0.0419421	0.145886	0.0929902	0.0898517	0.108378	0.777755	0.018086	0.239925	-0.0752033	0.336764	-0.0614995	0.467098	0.0465772	0.412954	0.05243	0.205498	0.0809997	0.0603624	0.119924	0.553135	0.0379926	0.153898	0.0911868	0.112094	0.101557	0.405996	-0.0532136	0.635048	-0.0304095	0.0276333	0.140442	NA	NA	0.0272011	-0.140831	0.743258	-0.0209879	0.0521369	-0.123971	0.418556	-0.0518047
CHOL	UCK2	0.0844153	-0.295858	0.621301	0.0864867	0.854885	-0.0320706	0.645644	-0.0805219	0.11437	-0.271694	0.0171792	0.400308	0.243941	-0.202255	0.771174	0.0509804	0.686755	0.0706442	0.241462	-0.2033	0.860895	0.0307292	0.00904772	0.434811	0.945882	0.0119056	0.866847	-0.0294023	0.220753	-0.212324	0.243747	-0.202337	0.768727	-0.0515406	0.139767	-0.254713	0.0918027	-0.289356	0.908018	0.0202635	0.541303	-0.106835	0.190948	0.226394
COAD	UCK2	0.189948	0.0629637	0.00458621	0.135677	0.133175	0.0721146	0.000130277	-0.182423	0.000678864	-0.162306	0.00372099	0.138813	0.608493	-0.0246265	0.00130375	-0.15368	NA	NA	0.079252	-0.0842406	0.0550213	0.0920644	0.0248265	-0.107593	0.201237	-0.061396	0.144609	0.0700617	0.00536533	-0.133282	0.820479	-0.0109115	0.348831	0.0450257	0.199463	0.061638	0.217412	-0.0592575	0.879741	-0.00727501	0.780173	0.0134195	0.692748	0.0189979
ESCA	UCK2	0.977659	-0.00318096	0.104796	0.182695	0.226727	0.136667	0.0218411	0.256117	0.0292061	0.243952	0.930921	-0.00984656	0.0518896	-0.218159	0.161195	-0.158145	0.496226	0.0771766	0.774168	0.0325838	0.00422742	0.316547	0.210179	0.141619	0.578606	-0.0630282	0.372618	0.101016	0.167336	0.155887	0.331485	0.109976	0.565755	-0.0651676	0.846928	-0.021925	0.158865	-0.159018	0.278091	0.122736	0.5037	0.0758465	0.17702	0.152449
HNSC	UCK2	0.0172169	-0.107572	0.0380466	0.0937427	0.50329	-0.0303073	0.0273287	-0.0996988	0.87872	0.00691095	0.918862	-0.00461366	0.277715	-0.0491323	0.00823611	-0.119242	0.57729	0.0252388	0.556048	-0.0266591	0.993942	-0.000343896	0.269821	-0.0499464	0.423061	-0.0362718	0.780321	-0.0126312	0.0519036	0.0878724	0.40477	0.03772	0.88751	0.00640659	0.803001	-0.0112982	0.51581	-0.0294246	0.219523	0.0555653	0.0911698	0.0763965	0.351613	0.0421683
KIRC	UCK2	0.164256	-0.0618045	0.0947223	0.074219	0.0652125	-0.0818696	0.696588	0.0173418	0.0208071	-0.102537	0.000276613	0.16068	0.639232	0.0208475	0.00121011	0.143208	0.0508094	0.0867045	0.0905537	-0.0751708	0.471046	0.0320501	0.0435054	0.0896114	4.77564e-06	-0.20137	0.0181342	0.104805	0.748682	-0.0142488	0.0381149	0.0920333	0.0993915	0.073192	NA	NA	0.00445041	-0.126004	0.0203146	-0.102935	0.00453024	-0.125755	0.350244	-0.0415291
LIHC	UCK2	0.081364	0.0913462	0.711746	-0.0194059	0.364183	-0.0476331	0.000525225	0.180624	0.0374649	0.108956	1.28427e-12	0.360121	0.042074	-0.106464	0.0813195	-0.0913595	0.0634349	-0.0972575	0.141348	-0.0771345	0.0133107	-0.129464	0.388422	0.0452766	0.534615	-0.0326066	0.823341	0.0117253	0.0503838	-0.1025	0.0312707	0.112752	0.0186439	-0.123093	0.420583	0.0422832	0.027853	-0.115131	0.0830721	0.0908403	0.00148366	-0.165753	0.000270059	0.189573
LUAD	UCK2	0.000516557	-0.154114	0.151965	0.0639077	9.7191e-05	-0.172731	7.66696e-15	-0.336899	0.0717858	0.0802693	2.01096e-09	0.263058	2.33452e-05	0.187226	0.292969	-0.0469341	0.113762	0.0705333	3.83347e-10	-0.274191	2.01895e-07	-0.229004	0.150862	0.0640798	0.186861	0.0588893	0.0275164	0.0981855	0.0332326	0.0948664	0.00155009	0.140634	4.70658e-06	-0.202287	NA	NA	0.213016	0.0555659	0.200161	0.0571597	0.0743251	-0.0795642	0.645235	0.0205564
LUSC	UCK2	0.0899759	-0.0782971	0.274094	0.0505502	0.086891	-0.079057	0.0167206	0.110328	0.0311383	0.0994349	0.970273	-0.00172356	0.00643957	0.125509	0.252474	0.0528893	0.319786	-0.0459894	0.301337	-0.047775	0.888104	-0.00650741	0.0053229	-0.128356	0.766527	-0.0137318	0.651201	0.020907	0.0357805	-0.0968688	0.0394209	0.0950478	0.313287	-0.0466105	0.659406	-0.0203817	0.199318	0.0593091	0.92197	0.00453025	0.0537033	-0.0890487	0.957788	-0.00244796
PAAD	UCK2	0.0421862	-0.153329	0.00778154	0.200005	0.991687	0.000791033	0.65814	0.0335833	0.334026	0.0732417	0.267718	-0.0839945	0.615801	-0.038083	0.508275	0.0501906	0.694929	0.0297669	0.697746	0.0294778	0.693997	-0.0298626	0.0852868	0.130086	0.359111	-0.0695378	0.741054	-0.0250841	0.179791	0.101574	0.327514	0.074232	0.128204	0.115105	0.0576226	-0.143391	0.680252	-0.03128	0.334481	-0.0731731	0.962025	-0.00361469	0.63999	0.035497
PRAD	UCK2	0.239107	-0.0540036	0.114853	0.0722897	0.957347	0.00245527	0.00184613	0.142225	0.903835	0.00554637	0.174029	0.0623444	0.0390827	0.0945091	0.839395	-0.00930371	0.518684	-0.029621	0.0634112	-0.0850631	0.985951	-0.000808386	0.143395	0.0670987	0.228957	-0.0551867	0.921941	-0.00449839	0.439076	-0.0355098	0.575208	0.0257221	0.939406	-0.00348969	NA	NA	0.207636	-0.057799	0.35092	0.042803	0.736415	0.0154517	0.939839	0.00346469
READ	UCK2	0.176124	0.108512	0.0689756	0.145528	0.100655	0.131502	0.166272	-0.111023	0.036473	-0.167089	0.0979586	0.132546	0.872861	-0.0128738	0.00054197	-0.272986	0.428423	0.0636444	0.963512	-0.00368041	0.000897494	-0.262467	0.304928	-0.0823966	0.727614	-0.0280159	0.191341	-0.10483	0.272481	0.088113	0.609455	-0.0410815	0.69808	0.0312007	NA	NA	0.0736414	-0.143172	0.0837305	0.138465	0.777562	0.0227244	0.533838	-0.0500223
STAD	UCK2	0.0135002	-0.128327	0.0656365	0.0958077	0.159457	-0.0732908	0.153105	-0.0744207	0.957572	0.00277515	2.15224e-07	0.265631	0.338496	-0.0498973	0.105227	-0.0843564	0.0157244	0.125491	0.000187116	-0.193039	0.00102816	-0.169991	0.22666	0.063004	0.0147065	-0.126742	7.51475e-06	0.230467	0.553136	-0.0309294	0.865441	-0.00883913	0.00256462	0.156338	0.870114	-0.00852935	0.00370118	-0.150546	0.0727467	0.0933993	0.0382994	-0.10775	0.458521	-0.0386539
THCA	UCK2	0.714327	0.0164933	0.0989748	0.0742403	0.168541	0.0619845	0.0257675	-0.100218	0.0148446	0.109444	0.202287	0.0574076	0.396187	-0.0382177	0.467804	0.0327078	0.0165764	0.10765	0.438622	-0.0348898	0.427258	0.0357618	0.704982	0.0170589	0.619489	0.0223731	0.152503	0.0644032	0.804212	-0.0111702	0.430737	-0.0354934	0.526101	0.0285612	NA	NA	0.00320757	-0.132215	0.668133	-0.0193162	0.00995071	-0.115755	0.786224	-0.0122207
UCEC	UCK2	0.756265	-0.0135653	0.0158486	0.105143	0.000107398	0.168078	0.147572	-0.0632301	0.655641	-0.0194884	0.457949	-0.0324314	0.834204	0.00914803	0.0186725	0.102526	0.905751	-0.00517472	0.567654	0.0249745	0.557334	-0.0256428	0.0281113	-0.0957461	0.85349	-0.00807096	0.131797	-0.065796	0.232092	-0.0521926	0.0116911	0.109864	0.179961	-0.0585541	NA	NA	0.0841261	-0.075383	3.71423e-06	0.200168	0.450002	0.0330071	8.23703e-09	-0.247957
BRCA	UCKL1	0.873733	0.00533444	0.0442724	-0.0674437	0.120695	-0.0520564	0.00773845	-0.0892204	0.614769	0.0168924	0.760633	0.010226	0.118523	0.0523626	0.642122	0.0155989	0.910011	-0.0037939	0.00232705	-0.101945	0.717631	0.0121384	0.786692	0.00908342	0.474105	-0.0240245	0.616308	0.016819	0.0926835	0.0563954	0.462034	-0.024685	0.0768302	-0.0593409	0.556133	0.0197556	0.0241684	0.0755672	0.00549047	0.0930059	0.0682808	-0.0611408	4.80086e-06	0.152613
CESC	UCKL1	0.539261	0.039328	0.365258	0.0579724	0.0060048	-0.174716	0.786252	0.0173771	0.543903	0.0388793	0.398538	-0.0540625	0.935101	-0.00521823	0.888239	0.00900574	0.58495	-0.03499	0.585334	0.0349542	0.837069	0.013178	0.0584363	-0.120829	0.937264	-0.00504395	0.157932	-0.0903055	0.646275	0.0294046	0.0546577	0.122678	0.214243	-0.0794653	NA	NA	0.0320674	0.136723	0.0228755	0.145052	0.649024	-0.0291596	0.583988	0.0350796
CHOL	UCKL1	0.643253	0.0811039	0.617894	-0.0873292	0.533697	0.10884	0.277798	0.188643	0.698241	0.0679236	0.4042	0.145528	0.22228	-0.211639	0.346068	-0.164146	0.138628	0.255424	0.0877446	-0.292876	0.728241	0.0608894	0.308206	0.177311	0.305462	0.178304	0.600122	-0.0917553	0.875237	-0.0275344	0.0989277	-0.283454	0.566531	0.10028	0.560304	0.101885	0.533228	-0.108964	0.24778	0.200651	0.0376526	-0.352777	0.0846983	0.295601
COAD	UCKL1	0.0625837	0.0893611	0.241511	0.056273	0.97556	-0.0014731	0.000394713	-0.169163	0.00107962	-0.156219	2.98594e-05	0.198726	0.0108822	-0.121988	0.000220154	-0.176265	NA	NA	0.0197839	-0.111707	0.230475	0.0576122	2.02332e-06	-0.225505	0.0853018	-0.0825988	0.116278	0.0754137	0.445676	-0.0366592	0.392175	0.0411277	0.0668786	-0.0879439	0.189847	0.0629779	0.387663	-0.0415207	0.375434	-0.0426001	0.639262	-0.0225359	0.00800289	0.127001
ESCA	UCKL1	0.355169	0.104738	0.805283	-0.0279966	0.522175	-0.0726019	0.305614	-0.115977	0.37567	0.100376	0.346527	0.106624	0.37567	0.100376	0.0801074	-0.196842	0.611152	0.057705	0.285973	-0.120757	0.204844	-0.143275	0.807547	0.0276645	0.670633	0.0482797	0.618617	-0.0565018	0.750401	0.0361228	0.460845	0.0836215	0.477818	-0.0804979	0.747605	-0.0365414	0.994401	-0.000797168	0.236637	0.133822	0.106243	0.18195	0.645831	0.0521666
HNSC	UCKL1	0.894962	-0.00597965	0.596158	0.0239978	0.4784	-0.0320976	0.160193	-0.0635436	0.656361	0.0201499	0.970505	0.00167462	0.830915	-0.0096707	0.171844	-0.0618222	0.219963	0.0555124	0.0473241	-0.0896488	0.393534	0.0386291	0.0370083	-0.094252	0.169	0.0622341	0.418482	-0.0366308	0.458429	0.033571	0.892528	-0.00611903	0.0433604	-0.0913068	0.321642	-0.0448649	0.838217	-0.00924707	0.029704	0.0982252	0.726267	0.0158552	0.443088	0.0347273
KIRC	UCKL1	0.759855	-0.0135948	0.925984	0.00413187	0.918745	-0.00453734	0.160734	0.0623237	0.672539	-0.0187974	0.000601415	-0.151717	0.310325	0.0451012	0.695612	-0.0174005	0.727383	0.0155043	0.130139	0.0672426	0.0105001	0.113446	0.772392	-0.0128644	0.0361815	0.092973	1.00952e-05	0.194495	0.182073	-0.0592984	2.71276e-06	-0.206412	0.00828254	0.117031	NA	NA	0.0560098	-0.0848412	0.0242219	0.0999826	0.000233699	-0.162564	0.0760947	-0.0787718
LIHC	UCKL1	0.757439	-0.0162203	0.474645	0.0375373	0.439298	0.0406031	0.688841	0.0210292	0.0023176	0.158975	0.00423318	0.149383	0.0904282	-0.0887526	0.548157	-0.0315332	0.64313	-0.0243315	0.210574	-0.0656865	0.7162	-0.0190924	0.963745	-0.00238737	0.665828	-0.0226805	0.985022	0.000986016	0.943298	0.00373568	0.420117	0.0423257	0.0217937	-0.120048	0.310519	0.0532271	0.323878	-0.0517798	0.000319046	0.187369	0.0391279	-0.108028	0.313443	0.0529069
LUAD	UCKL1	0.297531	-0.0464932	0.871019	-0.0072502	0.186351	-0.0589573	0.185081	-0.0591275	0.0674914	0.0815097	0.726481	0.0156196	0.945627	-0.00304537	0.241879	0.0522235	0.519302	0.0287703	0.0269676	-0.0985345	0.407407	0.036982	0.425032	-0.0356105	0.0175858	0.105722	0.56848	0.0254619	0.66445	0.0193683	0.0837818	-0.0770993	0.293913	-0.0468425	NA	NA	0.93539	-0.00361993	0.000421833	0.156482	0.228417	-0.053745	0.0211489	0.10267
LUSC	UCKL1	0.809284	0.011162	0.246436	0.0535672	0.698663	-0.017903	0.418263	-0.0374232	0.539604	0.0283644	0.492724	0.0317185	0.573328	0.0260414	0.595783	0.0245306	0.540542	-0.0282989	0.114529	-0.0728924	0.495203	-0.0315371	0.206323	-0.0583977	0.0140775	0.113191	0.518319	-0.0298678	0.000773253	-0.154565	0.24062	-0.0542312	0.157944	-0.065236	0.0382904	0.0955975	0.687556	0.0185988	0.0139375	0.113355	0.348846	-0.0433078	0.140923	0.0680175
PAAD	UCKL1	0.922989	-0.00733895	0.799375	-0.0192934	0.192966	0.0985943	0.0898116	-0.128256	0.460275	0.0560139	0.661997	0.0331793	0.420719	-0.0610708	0.279693	0.0819309	0.121078	0.117288	0.224109	-0.0920962	0.596365	-0.040193	0.26844	-0.0838684	0.000648558	0.254636	0.100482	-0.124215	0.444652	-0.0579806	2.27398e-06	-0.347641	0.778799	-0.0213219	0.968128	-0.00303339	0.434316	-0.0593032	0.00193786	0.232096	0.718225	-0.0273888	0.12639	0.115652
PRAD	UCKL1	0.153797	-0.0654051	0.0102361	-0.11747	0.911901	-0.00507919	0.154734	-0.0652569	0.848739	-0.00875563	0.00941455	0.118782	0.343918	0.0434286	0.542794	-0.0279334	0.0816787	-0.0797984	0.691342	-0.0182252	0.573523	0.0258356	0.0723394	-0.0823542	0.0453621	0.0916798	0.869918	-0.00751781	0.280505	0.0495121	0.0115552	-0.115548	0.0353234	-0.0963928	NA	NA	0.830441	0.00983015	0.54421	0.0278355	0.443388	-0.0351764	0.0150767	0.111233
READ	UCKL1	0.531891	-0.0502603	0.466039	0.0585939	0.649928	0.0365018	0.943225	0.00572947	0.00320178	-0.233848	0.00259927	0.238769	0.375711	0.0711758	0.588164	-0.0435437	0.546216	-0.0485191	0.85548	0.014652	0.024001	-0.180101	0.00103166	-0.259484	0.832302	0.0170344	0.357196	-0.073972	0.982829	-0.00173149	0.716998	0.0291554	0.120824	-0.124322	NA	NA	0.282885	-0.0862327	0.766317	-0.0239065	0.262692	-0.0899272	0.352596	0.0746806
STAD	UCKL1	0.000503661	-0.179984	0.00440461	0.147728	0.0124948	-0.129747	0.0256269	-0.116027	0.0708376	-0.0940263	1.70075e-07	0.267788	0.571135	0.0295383	0.0671239	-0.0952868	0.0523515	0.100952	0.000240935	-0.189788	0.000248169	-0.189404	0.0452093	-0.104185	0.199804	-0.0668053	0.0155834	0.12566	0.611155	-0.0265169	0.865745	0.008819	0.035199	0.10953	0.512963	0.0341174	0.00792815	-0.13784	0.00363211	0.150848	0.0632767	-0.0966543	0.120733	-0.0808107
THCA	UCKL1	0.0641954	0.0832542	0.146873	-0.0652981	0.872091	0.00725477	0.877375	-0.00695265	0.314999	0.0452532	0.0174095	0.106845	0.195815	-0.0582394	0.628407	0.0218054	0.482498	0.0316377	0.678471	0.0186783	0.890562	0.00619999	0.235504	-0.0534172	0.941956	-0.00328091	0.16641	0.0622957	0.571399	-0.0254998	0.0227329	-0.102373	0.564875	-0.0259332	NA	NA	0.192249	-0.0587063	0.918642	0.00460264	0.0990705	-0.0742193	0.220755	0.0551357
UCEC	UCKL1	0.741411	0.0144216	0.407658	-0.0361777	0.145937	0.0634859	0.00263851	-0.130858	0.647149	-0.0200034	0.29244	0.0459887	0.00662506	0.118251	0.0533592	0.0842899	0.00756877	-0.11633	0.0747449	0.0777674	0.930737	-0.00379883	0.0279654	-0.0958347	0.000103361	0.168477	0.048788	-0.0859607	0.318605	-0.0435686	0.181107	-0.0584006	0.00934315	-0.113237	NA	NA	0.21699	-0.053919	0.037603	0.0906844	0.400122	0.036762	3.84544e-05	-0.178473
