# Supplementary material for: Purine metabolism: a pan-cancer metabolic dysregulation across circulation and tissues
Source: Mol Cancer. 2025 Oct 14;24:255. doi: 10.1186/s12943-025-02482-9 (PMC12522462; doi:10.1186/s12943-025-02482-9)
Supplement: Supplementary file 4 — Supplementary Material 4. [file 12943_2025_2482_MOESM4_ESM.xlsx]

## Sheet: Supplementary Table S30
Supplementary Table S30: Clinical survival information and summary from 6,895 patients across 17 tumor types included in the prognostic modeling.
Tumor type	Number (0=Alived)	Number (1=Deceased)	Total sample size	Number of gene variables fitting univariate cox regression		CANCER_TYPE	SAMPLE_ID	STATUS (1=DECEASED, 0=ALIVED)	OVERALL TIME	RACE	AGE	GENDER (1=MALE, 0=FEMALE)	STAGE (1=STAGE I+II, 2=STAGE III+IV)	GENE_ACADM	GENE_ADA	GENE_ADCY3	GENE_ADCY5	GENE_AMPD2	GENE_APRT	GENE_ATIC	GENE_DCK	GENE_DGUOK	GENE_ENTPD2	GENE_GART	GENE_GMPS	GENE_HK2	GENE_HKDC1	GENE_HPRT1	GENE_IMPDH1	GENE_NME1	GENE_NPR1	GENE_NT5C3A	GENE_NUDT5	GENE_PAICS	GENE_PDE2A	GENE_PDE3A	GENE_PDE5A	GENE_PDE7A	GENE_PDE7B	GENE_PKM	GENE_PPAT	GENE_RRM1	GENE_RRM2	GENE_TXN	GENE_TYMP	GENE_UCK2
BLCA	221	174	395	29		TCGA-BLCA	TCGA-CF-A9FL	1	565	asian	85	1	2	10.2877	7.49985	8.90388	7.32193	10.5048	12.48	11.8289	9.47573	10.6715	7.65105	11.5817	11.1286	11.5132	4.24793	10.4189	9.53138	10.3998	7.40088	10.102	10.9794	12.3421	6.94251	7.90689	9.55075	9.52552	6.83289	16.0628	8.98868	11.1072	11.1427	12.4661	9.95855	9.70908
BRCA	917	143	1060	23		TCGA-BLCA	TCGA-UY-A78M	1	690	asian	81	0	2	7.97728	9.70044	9.50779	6.22882	11.8065	13.7677	11.5637	8.81057	11.314	8.3443	12.1085	11.2877	12.4961	2.32193	9.87652	11.9733	11.5994	7.49185	10.6008	11.3219	12.4502	6.93074	6.82018	7.31288	9.42626	5.39232	16.1011	9.08481	11.5033	11.0708	13.9428	11.7266	11.8098
CESC	96	26	122	23		TCGA-BLCA	TCGA-XF-A8HC	1	200	asian	79	1	2	11.6461	4.85798	9.35535	5.70044	10.0566	11.4605	9.96145	9.44087	10.6484	6.82018	11.0694	12.7127	10.6165	7.33985	11.6493	8.94251	10.3848	7.56224	10.1911	10.7723	11.9866	6.87036	5.42626	7.8009	11.4393	6.79442	14.2329	8.77479	12.5216	12.021	13.3365	6.76818	8.57365
CHOL	18	18	36	24		TCGA-BLCA	TCGA-E7-A97P	1	437	asian	73	1	1	11.2137	11.7591	9.66711	6.24793	10.5167	11.9922	12.3834	10.7254	10.6564	9.53138	12.0997	12.1069	13.0529	7.22882	11.014	12.031	10.5699	7.40088	11.1453	11.9712	12.8811	7.10852	8.08746	9.06878	10.4778	7.36632	17.2623	9.98868	11.9498	12.3896	13.7061	14.4467	10.3163
COAD	346	98	444	22		TCGA-BLCA	TCGA-XF-AAMJ	1	1670	asian	70	1	2	9.74987	7.71425	9.6987	9.36632	11.7065	11.973	11.5088	8.67596	10.3652	4.80735	11.188	11.0238	11.5162	1.58496	10.6926	11.9776	8.74483	8.12412	9.72281	9.58308	11.9222	7.90689	9.2384	9.32643	9.01123	9.16993	15.6083	9.08215	10.4512	9.53138	12.1424	11.3652	10.062
ESCA	99	63	162	29		TCGA-BLCA	TCGA-E7-A4XJ	1	68	asian	66	1	1	9.82018	8.86109	8.02791	4.90689	11.0244	12.392	11.4914	8.26209	10.0967	8.07682	11.1749	10.8186	12.5289	4.75489	10.7082	11.5765	10.5803	6.45943	9.91139	10.6519	12.4783	5.80735	5.70044	7.20945	10.7698	9.34873	15.2964	9.21917	10.0042	9.78627	13.1622	9.0634	10.5517
HNSC	248	187	435	22		TCGA-BLCA	TCGA-XF-A9SH	1	1971	asian	65	0	1	10.2372	7.14975	9.47978	6.18982	10.584	12.0475	11.5382	8.5812	10.0674	5.12928	10.8337	10.5479	10.944	8.08215	9.67596	10.5108	8.98299	6.61471	9.86109	10.7448	12.1614	6.94251	6.20945	8.31288	8.05528	8.85175	14.7946	8.67948	9.32643	8.16993	11.1805	8.80413	8.85175
KIRC	353	173	526	13		TCGA-BLCA	TCGA-CF-A47T	1	385	asian	58	0	1	9.68299	7.15987	8.09803	5.75489	10.3761	13.6064	12.4051	8.73132	11.2767	6.91886	11.5699	11.2402	12.2189	1.58496	10.7928	12.0694	11.4131	7.22882	9.91886	11.4742	12.8174	7.78136	7.03342	6.98868	10.5118	7.65105	15.8618	8.71081	10.6777	11.5343	14.4422	8.25267	10.0238
LIHC	231	121	352	27		TCGA-BLCA	TCGA-E7-A4IJ	1	674	asian	56	1	1	10.7591	9.49185	8.67243	6.49185	11.0768	11.9121	10.9636	10.0458	11.168	7.57743	12.7795	11.7313	11.863	2.58496	10.7364	12.6015	10.2228	7.67243	11.2003	10.9694	12.1157	7.50779	6.37504	8.38802	10.1306	6.39232	14.9531	9.17493	11.4773	11.3326	12.9665	10.9248	10.1202
LUAD	323	185	508	28		TCGA-BLCA	TCGA-CF-A9FH	0	0.5	asian	85	1	1	10.0238	6.50779	9.15482	6.33985	10.2656	12.6749	11.914	9.17742	10.8376	6.40939	11.098	11.0701	13.7195	6.9542	11.0532	10.3955	10.8178	6.61471	12.5582	10.7117	12.5265	7.66534	5.78136	7.53138	10.151	8.47168	17.4719	8.75822	10.2527	11.9256	12.8619	11.2842	9.17742
LUSC	282	212	494	23		TCGA-BLCA	TCGA-DK-A6AV	0	1952	asian	82	0	1	9.51767	8.27612	10.5546	5.32193	10.9972	13.0425	11.4486	9.95128	11.3443	5.35755	11.7582	12.0698	12.2399	3.16993	10.7177	10.4543	9.79928	7.25739	10.6609	11.1724	13.1235	7.27612	6.94251	7.42626	10.5803	5.75489	16.098	10.0224	11.6786	12.3562	13.1453	9.88722	10.0348
PAAD	82	92	174	23		TCGA-BLCA	TCGA-E7-A677	0	820	asian	81	1	1	11.2773	10.2912	10.4858	10.9751	11.7069	12.8803	13.3014	10.3208	11.272	7.85798	12.5663	12.2787	13.3361	5.90689	11.8198	11.7069	10.8811	8.86419	10.8657	11.8439	13.263	7.75489	8.55842	9.18239	12.9101	7.57743	18.1387	9.79604	12.5788	12.1447	13.6122	10.098	10.2969
PRAD	276	5	281	14		TCGA-BLCA	TCGA-E7-A5KE	0	17	asian	78	0	1	11.5575	4.32193	9.76984	6.22882	10.809	12.354	11.0512	10.3674	10.5236	10.218	11.5459	12.3614	10.5108	0.01	10.7194	11.2009	10.2992	7.01123	10.3465	11.0761	12.8984	6.78136	6.30378	8.40939	11.2473	6.2854	15.602	9.85953	11.352	12.2577	12.2845	6.45943	10.8673
READ	134	26	160	27		TCGA-BLCA	TCGA-E7-A6ME	0	731	asian	75	1	1	10.5594	8.77479	10.4019	8.43879	10.1344	11.7134	11.4974	10.643	11.0788	8.33092	12.0182	12.157	10.4594	2.58496	11.3761	10.6891	10.4858	7.47573	10.5226	11.6407	12.3641	7.02237	6.52356	11.7322	11.2491	8.34873	15.0873	9.82972	12.4325	12.0728	12.8832	10.6036	10.352
STAD	223	141	364	27		TCGA-BLCA	TCGA-CF-A3MH	0	398	asian	75	1	1	10.1536	8.71425	9.04166	5.12928	11.1867	13.4002	12.3055	8.93369	11.5831	8.50383	11.5527	11.7125	13.5655	7.03342	11.5073	12.2845	11.4533	6.97728	10.5661	11.4788	12.9988	7.09803	6.71425	7.73471	11.5864	8.07146	18.255	9.24079	10.9851	11.4671	13.5335	8.56605	10.3597
THCA	476	16	492	5		TCGA-BLCA	TCGA-XF-A9SI	0	2423	asian	73	0	1	10.5304	9.5812	10.9922	9.50779	11.3918	11.3185	12.2303	10.5038	10.7347	8	11.3929	12.3567	9.61102	3.45943	11.1306	12.4732	9.81538	10.275	10.7607	11.3476	11.4778	9.93517	9.18239	10.4635	11.1472	7.66534	15.8228	8.98299	11.9326	11.8963	12.7175	14.6214	10.7707
UCEC	450	89	539	25		TCGA-BLCA	TCGA-FD-A62N	0	82	asian	69	1	2	10.1408	10.2456	9.94398	7.08746	10.7797	11.8357	11.6248	9.76984	10.4645	8.48382	11.9633	12.2444	10.8657	4.52356	11.352	12.478	9.76155	8.5157	10.4105	11.5132	11.8313	7.7879	7.43463	8.50779	10.6202	6.35755	16.2118	8.98299	11.0855	11.7465	14.3771	14.6956	10.224
						TCGA-BLCA	TCGA-CF-A5UA	0	365	asian	67	1	1	10.098	8.13955	8.10329	6.44294	10.4868	13.5989	11.9516	8.57365	11.6644	5	11.5013	11.4888	11.8242	2.80735	10.8525	10.0485	11.363	7.71425	10.23	12.1932	13.0336	6.87036	4.80735	7.08746	10.9593	7.8392	17.4014	9.10329	10.7895	11.3432	14.3602	9.56796	9.98726
						TCGA-BLCA	TCGA-E7-A5KF	0	20	asian	67	1	1	11.774	6.67243	9.8009	7.45121	10.5555	12.8929	12.4936	10.4273	11.1144	5.70044	12.2363	11.8158	13.022	5.49185	11.2107	10.9278	9.50978	5.9542	10.668	11.0077	12.8617	7.39232	6.14975	7.35755	10.5275	8.17991	17.243	9.57365	11.9114	11.4476	12.4622	10.102	11.1351
						TCGA-BLCA	TCGA-E7-A7XN	0	428	asian	66	1	2	11.318	11.4136	11.66	5.2854	10.1586	12.5694	12.2414	10.3231	10.5622	8.11894	12.1539	11.7607	13.2239	3	10.6101	11.9429	10.4798	5.61471	11.6325	11.3449	12.9179	6.53916	4.52356	6.52356	9.69523	4.70044	16.7058	10.1163	12.1592	13.1189	13.6743	15.0204	10.927
						TCGA-BLCA	TCGA-G2-A3VY	0	536	asian	66	1	1	10.8408	10.2372	10.1254	7.05528	11.7793	13.0952	12.3154	10.5333	11.6078	6.40939	12.3829	12.3993	12.9809	2	10.7185	12.9897	9.43254	6.71425	10.4828	12.0014	12.7356	7.36632	6.02237	7.36632	11.3652	7.13955	15.6367	9.84235	11.6032	11.9304	12.9315	9.03342	11.207
						TCGA-BLCA	TCGA-E7-A85H	0	394	asian	64	1	2	10.1396	9.57743	9.36632	6.79442	10.9359	13.0683	12.6328	11.8626	11.5314	7.75489	12.6034	12.4633	12.3658	2.32193	11.4041	12.258	11.2167	6.47573	11.5459	11.92	14.4976	6.02237	7.44294	8.3443	10.8025	4.75489	15.5472	10.9744	12.0007	11.7078	14.5378	11.6676	11.2998
						TCGA-BLCA	TCGA-E7-A7PW	0	416	asian	63	1	2	9.38154	8.50779	9.71425	6.62936	10.7194	12.3208	11.3202	9.23601	11.8615	6.45943	11.0802	11.5187	12.6762	4	11.0437	11.1228	11.3853	5.78136	9.97728	12.9758	12.5289	6.14975	5.72792	7.43463	10.973	6.14975	14.7497	8.55075	11.2929	11.1586	12.9794	10.4878	10.7398
						TCGA-BLCA	TCGA-CF-A1HR	0	389	asian	62	1	2	10.3554	7.08746	9.58684	7.49985	10.1724	12.0217	12.268	9.56605	10.5314	5.72792	11.3471	12.4333	12.203	6.59991	10.0362	10.7423	10.3219	7.65821	9.93811	10.9701	11.6402	8.3966	6.78136	7.54689	10.9046	7.60733	16.0254	8.65821	11.4929	11.4666	11.8384	10.6083	8.78463
						TCGA-BLCA	TCGA-CF-A3MI	0	370	asian	62	1	1	8.67243	7.57743	8.05528	6.53916	10.9687	12.7226	11.2076	8.25739	10.7254	8.59246	10.4767	10.9672	12.2776	6.14975	9.90238	10.9614	11.6284	7.67243	10.2527	10.9737	11.7275	8.07682	7.53916	7.61471	7.90087	6.72792	15.7994	7.92481	9.58308	10.3923	14.4882	9.07682	9.52356
						TCGA-BLCA	TCGA-CF-A47X	0	384	asian	60	1	1	11.8301	7.21917	9.36413	6.58496	11.6266	13.3544	12.0624	10.3998	11.8673	3.45943	11.4888	12.5732	13.6822	3.90689	10.7674	11.9035	10.4939	7.85175	10.9607	11.7099	13.2583	7.50779	7.30378	8.87344	12.6546	9.56796	15.5952	10.7271	10.5962	9.03892	13.9823	9.75154	10.0901
						TCGA-BLCA	TCGA-CF-A5U8	0	399	asian	59	1	1	10.1636	6.14975	8.99718	5.64386	10.8178	13.3082	12.2538	8.87958	11.2709	7.35755	11.1699	11.0708	12.3829	2.58496	10.5555	11.3415	10.2082	5.88264	10.6008	11.1176	12.1991	6	6.2854	7.04439	9.01959	6.87036	16.2906	8.74483	9.89785	9.00562	12.6495	9.39446	9.23122
						TCGA-BLCA	TCGA-CF-A8HY	0	345	asian	59	1	1	8.93664	7.88264	7.8009	5.61471	10.9491	13.5843	12.1193	7.97154	11.3608	6.75489	11.0423	10.7855	12.3191	3.80735	9.73132	9.92481	11.9363	7.2854	9.39232	10.021	11.9798	7.43463	5.85798	6.59991	9.97154	7.25739	17.1931	8.62205	10.255	11.5377	13.3298	10.0539	9.96723
						TCGA-BLCA	TCGA-E7-A8O8	0	13	asian	59	1	1	9.56224	7.62205	8.67596	8.27146	10.4929	12.3783	10.7632	8.78136	10.7944	6.91886	11.3026	11.2324	11.2597	3	10.744	11.2691	11.0802	7.67948	11.1712	11.0967	12.4481	7.19967	6.39232	7.33985	10.8154	9.83605	14.9658	8.93369	10.3421	10.611	13.4804	9.51373	10.2264
						TCGA-BLCA	TCGA-E7-A678	0	798	asian	55	1	2	9.96145	6.64386	7.41785	3.70044	9.93958	11.8738	12.0126	8.34873	10.8065	4.24793	11.314	10.6847	11.6484	3.32193	9.93811	10.2574	9.22641	4.64386	10.3498	10.8273	11.3537	4.75489	5.12928	7.06609	8.89785	7.92481	16.2859	7.79442	10.2644	8.7879	13.4398	9.62571	9.94837
						TCGA-BLCA	TCGA-CF-A47Y	0	373	asian	55	1	1	9.60918	6.75489	8.77808	6.98868	10.5068	13.3184	11.8443	8.19476	11.032	8.88874	11.1762	10.7296	12.3707	4.9542	11.0168	11.823	10.1787	7.2384	10.5565	10.7773	11.9947	7.50779	7.39232	7.7879	9.18735	6.56986	16.4074	8.19967	9.79604	9.30378	13.7103	9.44708	8.62936
						TCGA-BLCA	TCGA-CF-A8HX	0	345	asian	55	0	1	9.72962	7.61471	8.89785	4.85798	10.8424	12.4278	10.3923	7.97154	10.7074	7.88264	10.4242	10.4491	11.1706	3.45943	10.5727	10.4157	11.3712	5.70044	9.99577	10.1861	11.4221	5.72792	6.10852	6.89482	11.2119	8.90087	14.9712	8.24793	10.0647	10.6935	12.0684	10.0728	10.0795
						TCGA-BLCA	TCGA-CF-A7I0	0	368	asian	54	1	1	10.3597	7.8009	9.96867	9.02791	10.9887	12.8586	10.8486	9.3443	11.0735	9.50978	11.1978	11.1855	11.9073	3.45943	10.5028	10.4481	10.1536	8.54303	10.23	10.7194	12.1542	8.93369	8.02791	9.16491	9.94251	9.24079	15.6153	8.92778	10.3652	9.59805	12.8706	8.80735	9.2738
						TCGA-BLCA	TCGA-CF-A27C	0	425	asian	52	1	2	10.9315	7.61471	9.49586	4.75489	11.3264	13.2213	12.1463	8.92778	11.0775	6.93074	12.0441	12.0327	12.5551	6.04439	10.927	9.66356	10.4252	6.45943	10.6591	10.9629	13.062	5.97728	7.70736	10.4767	10.5632	8.29002	16.8413	10.2143	10.8549	11.2889	13.1596	10.3465	10.2264
						TCGA-BLCA	TCGA-E7-A8O7	0	466	asian	52	1	1	11.6398	7.5157	9.85953	6.10852	11.4974	12.4594	12.8853	9.89178	11.268	6.75489	12.3512	11.6402	13.5503	4	10.1098	11.5613	10.207	7.36632	11.352	11.2228	12.2577	7.21917	7.33092	8.69	10.3696	8.39232	17.373	9.32643	11.2282	9.85643	13.8266	11.3437	10.1787
						TCGA-BLCA	TCGA-CF-A47V	0	379	asian	52	1	1	9.84706	8.49985	9.80413	8.90689	11.4808	12.8224	12.0095	8.62936	10.7731	8.43879	11.4909	10.9091	12.0241	3.70044	10.6036	10.5565	10.2609	8.79766	10.8057	10.9535	11.4988	8.78136	9.09803	8.34873	10.4939	10.3264	16.9461	7.89482	10.3151	9.90238	12.1501	12.1646	9.85643
						TCGA-BLCA	TCGA-CF-A9FF	0	361	asian	52	1	1	9.633	6.45943	8.17991	7.06609	10.3805	12.3348	10.5641	8.85175	10.6312	5.78136	10.3072	10.5382	12.5031	3.80735	10.275	8.88264	10.5411	7.40939	10.3498	10.0888	11.6303	7.77479	7.56986	8.18488	10.6528	8.224	15.737	8.16491	9.33762	10.4346	12.7017	9.37287	9.71081
						TCGA-BLCA	TCGA-CF-A9FM	0	398	asian	50	1	1	11.3515	7.49985	8.49185	8.47573	10.4543	12.42	12.022	9.30834	10.9166	6.52356	11.4919	11.1997	13.4533	6.18982	10.9823	11.8416	9.41363	5.93074	10.7381	10.9535	11.6234	6.79442	6.10852	8.0607	9.50383	7.20945	17.1601	8.57743	10.6564	8.76818	12.2122	10.3685	8.41363
						TCGA-BLCA	TCGA-CF-A3MG	0	369	asian	48	1	1	10.8688	4.70044	9.47573	4.70044	10.5613	12.8437	11.865	9.46761	11.1085	8.224	11.8568	11.9469	14.4589	4.52356	11.628	11.5068	10.9374	6.22882	10.1774	11.1364	12.5939	7.03342	5.20945	6.74147	11.7632	7.42626	17.3122	8.61102	11.7773	12.6904	13.1501	7.64386	8.83289
						TCGA-BLCA	TCGA-CF-A47W	0	368	asian	42	1	1	10.5333	8.2384	7.98868	6.61471	10.7134	13.6573	12.6933	8.62936	12.0345	9.47776	11.5401	11.0993	11.9773	1.58496	10.8941	11.7117	10.764	7.27612	10.7985	11.1649	12.1895	7.75489	6.88264	6.59991	8.90087	8.32193	17.0266	8.2384	10.933	10.9542	14.6199	9.77314	9.33539
						TCGA-BLCA	TCGA-CF-A47S	0	333	asian	41	1	1	11.5741	7.44294	9.15482	7.31288	11.5641	14.1492	13.3316	9.55267	12.4427	8.73809	12.2369	12.0654	14.0191	4.45943	11.6961	12.1443	11.3281	7.31288	11.4878	11.7653	12.58	7.49185	6.74147	7.53138	10.733	8.2854	17.7473	9.18488	10.9986	9.00843	14.7879	12.6396	10.6083
						TCGA-BLCA	TCGA-E7-A6MF	0	750	asian	37	1	1	11.7194	6.76818	10.4062	9.00282	10.4357	12.116	11.3641	9.25739	10.3696	7.56224	11.6257	11.5897	10.6865	3.45943	8.83605	11.4252	8.42626	6.59991	9.79766	10.3794	11.8792	7.66534	4.9542	9.27146	10.1911	6.12928	16.019	9.12153	11.783	6.80735	11.9848	9.36194	10.7944
						TCGA-BLCA	TCGA-CF-A3MF	0	383	asian	34	1	2	7.85175	7.02237	7.03342	6.44294	10.851	10.9844	10.2058	6.2854	9.22159	7.10852	9.91588	9.87191	8.84235	2.32193	9.67066	10.6393	10.7985	7.49985	9.03342	9.23122	10.1712	6.71425	6.12928	6.62936	8.98299	6.44294	14.6101	6.50779	7.67948	8.03892	11.5172	7.91886	8.13955
						TCGA-BLCA	TCGA-XF-AAMX	1	206	black or african american	87	0	2	10.4868	5.85798	9.03342	5.83289	10.5878	12.9146	12.341	9.5411	10.9873	8.48382	11.7495	11.6658	11.0168	3.45943	9.57365	10.9366	9.79442	7.60733	10.236	10.5382	12.6515	7.33092	7.34873	7.82655	9.04985	5.83289	14.3521	9.59805	11.4722	11.6865	11.7908	9.97585	10.5226
						TCGA-BLCA	TCGA-FD-A3B5	1	272	black or african american	86	1	2	10.8857	10.403	11.2779	5	11.3026	12.3242	12.0895	9.75656	10.7288	7.08746	12.2461	12.5411	14.5742	7.67243	11.3337	13.1735	11.0821	7.44294	10.1774	11.2192	13.3508	9.27146	8.56986	9.46964	10.2228	6.39232	17.4537	10.4094	12.3309	12.6631	13.4128	12.7283	10.7262
						TCGA-BLCA	TCGA-4Z-AA7R	1	522	black or african american	73	1	2	11.6609	9.36413	10.1007	4.9542	11.0735	12.6555	12.4727	10.8017	11.1273	8.44708	11.9883	11.7004	13.1265	2.80735	11.2107	12.6762	10.5127	7.78136	11.1618	12.7591	12.72	7.90087	8.36632	9.71425	11.8777	7.21917	16.1277	9.2384	12.0861	13.1102	12.8927	10.2877	9.73302
						TCGA-BLCA	TCGA-FD-A3N5	1	685	black or african american	69	1	1	10.5401	9.96145	11.8451	7.31288	10.7764	12.717	11.6257	11.0286	10.7814	8.91289	13.1077	13.921	14.6877	7.62205	12.0855	13.4325	10.9069	7.54689	10.4263	13.5525	13.8825	7.80735	7.16993	8.86109	11.5098	5.55459	17.6272	10.2808	14.1587	13.9674	13.7646	10.6375	11.6248
						TCGA-BLCA	TCGA-4Z-AA7S	1	1064	black or african american	66	1	2	10.8742	9.53138	9.13186	6.90689	11.0464	12.842	11.7541	10.5187	10.7211	6.52356	11.713	12.3961	13.151	3.70044	11.8615	9.56224	10.1674	7.91886	9.70908	11.1286	13.2056	8	6.67243	7.72792	11.0934	9.76984	16.8497	9.89026	11.4702	12.2125	13.6765	8.3837	9.58871
						TCGA-BLCA	TCGA-4Z-AA86	1	311	black or african american	66	1	2	11.1997	10.0755	12.1636	6.10852	11.4702	11.2533	12.2458	10.3934	11.0855	5.2854	13.0095	12.8478	13.0556	3.32193	11.927	13.0005	10.0389	7.34873	10.8392	11.4294	12.8901	7.64386	9.22159	9.49185	12.1043	7.30378	16.8259	9.96867	12.416	13.1861	13.6977	14.2006	12.9647
						TCGA-BLCA	TCGA-FD-A3B7	1	122	black or african american	66	1	2	11.178	11.5703	11.1978	5.88264	11.592	12.2003	12.5299	9.81858	10.7797	10.4798	12.978	12.5471	12.2682	7.65105	11.8517	11.7254	11.1793	9.86264	10.8392	11.0251	12.9699	8.76818	10.1319	9.39874	11.8345	7.36632	17.6202	9.67066	12.2467	13.2682	13.0319	14.0976	11.6533
						TCGA-BLCA	TCGA-G2-A3IB	1	220	black or african american	66	1	1	10.783	11.6262	11.2848	3.70044	11.1935	12.7419	12.6418	8.48784	10.9418	7.08746	12.4184	12.2744	14.4945	10.9542	11.4656	13.9385	10.5177	5.88264	10.5906	11.6834	13.7859	6.22882	6.9542	6.75489	12.1846	3	17.8161	10.1344	13.4144	12.937	15.639	14.4233	10.9388
						TCGA-BLCA	TCGA-FD-A62S	1	406	black or african american	60	0	2	10.1421	9.71768	11.4818	8.11894	11.3146	12.8374	12.6207	10.2866	10.7151	7.33092	12.4215	12.3737	11.2461	6.50779	10.9571	13.2716	9.43045	8.11894	10.4737	11.0974	12.8404	7.93664	9.1472	10.0196	11.8325	6.91886	16.5477	9.43879	12.4976	12.6427	13.007	14.0432	9.99718
						TCGA-BLCA	TCGA-4Z-AA82	1	1556	black or african american	59	1	2	10.5314	9.9571	11.06	7.43463	11.1674	11.7039	12.4574	9.86882	10.9679	9.16742	12.1526	12.2615	10.4898	1.58496	11.7069	11.2246	10.3977	7.16993	10.6257	10.8416	13.0305	7.13955	7.80735	8.86419	10.6952	6.18982	16.3997	10.0348	12.5791	13.0098	14.5683	13.6597	11.5565
						TCGA-BLCA	TCGA-BT-A20V	1	154	black or african american	59	0	2	10.1649	7.96	10.9922	5.64386	9.87958	12.5608	11.4152	9.11114	11.245	6.18982	11.3712	12.4081	10.0941	2	11.7748	11.1636	9.88722	8.92184	10.5304	11.0788	11.9509	5.83289	4.08746	6.26679	10.6036	5	15.8762	9.34651	11.6729	12.2729	12.8088	11.3869	10.7211
						TCGA-BLCA	TCGA-G2-A2EC	1	696	black or african american	58	0	1	11.3576	8.34873	10.4522	10.0168	10.9114	12.2369	12.511	10.3891	10.9549	5.58496	11.5527	11.656	13.0166	6.67243	10.3998	11.863	10.043	7.7879	10.5008	11.2027	12.0112	8.74147	10.3287	9.93517	11.0056	10.102	16.1952	9.07414	11.6555	9.8933	12.0345	10.9586	9.92481
						TCGA-BLCA	TCGA-FD-A3B4	1	510	black or african american	55	0	2	11.6384	10.9564	10.783	8.99435	11.1312	12.7353	12.4186	11.2685	11.227	8.78463	12.5078	12.9241	12.2082	6.44294	12.4893	13.1212	10.7339	8.26209	11.7748	11.1605	13.8555	8.60733	8.04439	9.87805	12.0179	7.98868	17.2126	10.7657	12.7446	12.3485	15.2474	14.559	11.5527
						TCGA-BLCA	TCGA-GC-A6I3	0	423	black or african american	90	0	2	8.48784	10.4564	8.18982	6.65821	11.6533	14.1227	11.7385	7.48382	11.6991	5.32193	11.4783	11.4676	12.2318	0.01	10.93	12.9189	11.7973	6.33985	9.94398	11.2784	11.5435	6.37504	4.90689	6.52356	9.98868	7.82018	14.8594	7.54689	10.568	11.3399	14.2062	12.6027	10.1228
						TCGA-BLCA	TCGA-FD-A5BU	0	588	black or african american	76	0	1	11.3343	10.3955	10.0835	8.65105	11.1338	13.0771	12.0417	9.3837	10.2408	5.70044	11.9392	12.2641	11.7834	7.16993	10.4179	12.463	9.44294	7.96	9.57743	10.9226	12.3778	8.11894	7.08746	8.72792	11.7177	6.12928	16.7614	8.97441	12.1752	11.5382	14.5108	14.5599	11.2866
						TCGA-BLCA	TCGA-FD-A43P	0	832	black or african american	74	1	1	11.041	11	11.1536	6.16993	10.445	13.2755	12.1561	11.2101	11.3712	6.79442	12.2125	13.1558	12.4926	3.70044	11.3231	12.4414	9.52748	7.89482	10.9248	12.5641	13.2842	7.56224	7.07682	9.3443	12.2592	7.19967	15.9407	10.1886	12.6257	13.05	13.4936	12.2923	10.9549
						TCGA-BLCA	TCGA-KQ-A41N	0	1604	black or african american	73	1	2	9.54882	8.87036	8.62571	5.35755	11.1389	13.9508	12.6314	8.74147	11.2538	6.47573	10.6978	11.0828	11.341	7.22882	10.3487	11.0888	11.3729	7.09803	10.4939	10.7339	12.8727	7.26679	5.75489	7.37504	10.9823	8.66534	15.7283	9.05799	11.0532	10.3805	13.1844	9.40088	10.5314
						TCGA-BLCA	TCGA-4Z-AA87	0	1454	black or african american	72	1	2	11.7731	7.08746	8.89785	5.32193	11.3955	13.183	12.1131	9.9629	12.1699	7.01123	13.3278	12.3242	13.4327	4.45943	10.7254	10.9586	11.1812	6.35755	10.8345	11.6179	13.9161	5.72792	5.97728	7.56224	10.4294	4	15.8794	10.7364	12.1183	11.9809	13.149	10.7928	11.2562
						TCGA-BLCA	TCGA-UY-A8OD	0	3432	black or african american	67	0	1	9.8392	7.93074	9.04712	10.1799	10.1824	13.1633	12.0918	10.1724	10.7748	5.58496	10.224	10.9694	11.8922	3.16993	10.5275	11.2986	11.2246	8.85798	9.6865	10.5421	12.4289	8.8857	7.73471	9.40301	11.2432	7.55459	15.0323	9.20457	10.2058	11.3647	12.9887	11.528	9.87344
						TCGA-BLCA	TCGA-4Z-AA7O	0	512	black or african american	64	1	1	9.99152	6.50779	9.26209	5	9.93517	11.8178	11.6653	9.82337	10.4305	5.85798	11.1699	11.3348	11.4558	4	10.1935	8.53528	9.62936	6.98868	9.98014	10.543	12.4737	8.35755	6.65821	8.07682	9.64205	5.67243	15.6151	9.31288	10.6502	11.4742	11.6939	10.5546	9.65821
						TCGA-BLCA	TCGA-H4-A2HQ	0	590	black or african american	64	0	2	12.0021	8.38802	10.207	7.71425	11.128	12.664	12.179	9.48382	11.0921	9.65105	12.7339	12.3026	13.2615	2	11.2009	11.7785	10.6707	6.16993	10.8711	11.7486	12.6611	7.66534	7.02237	9.08215	11.2354	6.9542	16.312	9.98584	11.3982	12.5939	13.6957	11.9088	9.75822
						TCGA-BLCA	TCGA-S5-AA26	0	503	black or african american	46	1	2	10.4939	7.34873	7.63662	5.08746	10.5187	12.1963	10.2228	8.93958	9.73809	4.9542	10.9908	11.1325	12.2808	3.90689	10.3783	10.2095	10.1098	5.35755	10.0028	10.2935	12.0331	7.45943	5.58496	8.53528	11.1948	7.16993	15.2684	8.7211	10.1059	10.7781	12.857	8.84862	9.79442
						TCGA-BLCA	TCGA-FD-A3N6	0	851	black or african american	43	0	1	11.1674	10.2396	11.007	4.45943	11.242	13.405	13.1688	10.9744	10.4959	7.56224	13.0755	12.7946	14.2386	10.6165	11.7503	10.9129	10.2021	6.49185	11.7198	10.8978	14.0429	7.11894	8.44294	8.93074	11.6755	5.64386	17.5439	10.5555	13.4648	13.2061	15.2916	15.5773	10.7254
						TCGA-BLCA	TCGA-HQ-A5ND	1	274	unknow	78	1	2	11.8082	10.4676	10.6715	6.80735	10.8956	13.0002	12.5068	11.2485	10.9001	4.39232	12.4702	13.0098	13.0896	5.97728	12.6589	12.236	10.7616	6.18982	11.03	12.0941	14.228	5.75489	6.32193	9.17243	10.8857	7.13955	17.3537	11.3788	12.7375	13.6267	13.5493	12.3842	10.933
						TCGA-BLCA	TCGA-C4-A0F7	1	62	unknow	77	1	2	12.2992	9.00282	11.821	8.67596	11.4419	13.5788	13.9253	10.3597	10.5594	7.70044	13.1118	14.3564	12.6069	4	11.8388	12.4752	10.445	11.0168	11.8811	12.6393	13.3542	8.80413	9.30834	10.4522	11.2366	8.40088	18.9801	10.1202	13.6275	14.1394	13.0899	10.703	12.247
						TCGA-BLCA	TCGA-XF-AAN1	1	941	unknow	75	0	2	9.85175	9.22882	9.64746	8.42626	10.4747	12.7914	12.2441	8.9571	10.4553	8.23362	11.3608	11.1286	11.7305	5.32193	11.1039	11.158	10.4717	7.50779	10.0265	10.7805	12.8977	7.39232	7	7.52356	9.77479	9.3015	16.5432	9.10066	11.062	10.6582	12.2336	10.3129	9.57175
						TCGA-BLCA	TCGA-BT-A20N	1	795	unknow	72	1	2	10.4179	9.46557	10.7789	4.58496	10.3783	12.357	11.8781	10.2609	10.341	8.27612	13.3276	13.2697	12.9527	3	11.2228	10.6996	10.2819	10.0795	11.3309	11.8142	12.6284	6.9542	6.47573	8.40088	11.5048	6.02237	15.7519	9.70908	11.4702	12.5452	12.9647	12.0684	11.9855
						TCGA-BLCA	TCGA-C4-A0EZ	1	273	unknow	69	0	2	11.4691	7.29462	10.4073	7.39232	9.7879	12.0289	11.4767	12.0307	11.6425	12.48	11.9996	12.4717	9.96145	5.04439	11.8868	10.568	11.0444	7.90087	11.041	12.3655	12.9622	10.5925	7.32193	11.0175	12.7007	7.41785	15.8771	10.6591	13.7139	13.9303	12.9478	8.86419	11.9058
						TCGA-BLCA	TCGA-2F-A9KR	1	3183	unknow	59	0	2	11.4848	9.75154	10.021	7.57743	11.3365	12.6396	11.6434	10.3332	11.0539	7.48382	11.8186	11.6573	13.0593	6.08746	10.2276	10.6184	10.891	7.09803	10.9159	10.3117	12.8108	7.20945	6.71425	9.15735	10.5632	5.58496	16.7409	10.1163	11.1836	12.9965	13.332	11.7368	9.91737
						TCGA-BLCA	TCGA-HQ-A5NE	1	370	unknow	56	1	2	11.0614	7.32193	11.0928	7.96578	10.7254	11.8788	11.7215	10.3264	10.3923	6.04439	12.4003	12.3937	12.7192	4.32193	11.6578	11.7457	9.93517	8.81698	11.056	12.3216	12.8815	7.42626	8.68299	9.5411	10.7228	7.93074	16.56	9.98014	12.8331	12.7671	13.4441	12.5411	10.0251
						TCGA-BLCA	TCGA-KQ-A41O	0	1538	unknow	84	1	2	9.9542	6.9542	8.96578	6.18982	10.6662	12.2453	11.1254	8.74483	11.592	8.07682	9.82972	11.1917	12.6294	1	12.0631	10.7515	11.3647	5.52356	10.3619	10.3998	12.5591	6.83289	4.52356	8.18488	10.6221	6.26679	15.3007	8.81057	10.3343	11.4491	12.5941	8	9.70563
						TCGA-BLCA	TCGA-C4-A0F6	0	700	unknow	82	0	2	10.1523	9.10329	10.115	4.64386	10.1548	11.5656	10.5048	9.69174	10.0782	5.80735	11.043	11.2324	11.6896	0.01	10.314	11.6729	9.36413	6.02237	10.255	9.81218	12.6707	6.72792	7.53916	8.0607	9.64205	6.58496	15.3799	9.98868	10.7715	11.9697	11.1072	9.46148	9.60918
						TCGA-BLCA	TCGA-E5-A4U1	0	1181	unknow	72	1	1	10.0861	8.51964	9.37938	7.01123	11.7871	13.7682	11.4273	9.98299	10.5746	6.14975	11.0492	10.697	9.31515	2.80735	10.6008	10.4605	11.461	7.50779	11.3592	11.0987	12.6117	9.41785	5.32193	7.65105	13.1997	10.2396	14.8107	9.03617	10.716	11.0217	13.4607	9.42836	11.6812
						TCGA-BLCA	TCGA-C4-A0F1	0	89	unknow	71	1	2	10.8033	10.3298	9.17742	5.52356	10.6609	12.6528	12.3183	9.65105	10.3163	4.85798	12.1545	12.7977	11.7557	2.32193	10.6795	12.4486	10.7048	7.25739	9.45327	10.9844	12.4648	7.78136	8.62205	8.65464	9.63481	6.16993	17.7209	9.01959	12.8029	11.2149	13.8645	14.3902	11.0505
						TCGA-BLCA	TCGA-C4-A0F0	0	59	unknow	60	1	1	10.4717	11.06	10.0098	4.9542	10.2444	12.0868	12.7803	10.0768	9.63844	3.16993	13.1909	12.4798	12.3512	5.35755	12.4813	11.6702	11.1202	7.57743	10.1383	10.4522	13.2302	7.37504	7.54689	7.26679	10.8603	5.58496	17.053	10.4878	11.9926	13.109	14.2672	12.1883	10.9614
						TCGA-BLCA	TCGA-YF-AA3M	0	415	unknow	57	1	1	10.9858	9.56415	9.52552	6.04439	10.1163	10.8865	11.8242	9.48583	10.0941	4.32193	11.7838	12.7628	10.6653	4.08746	10.7082	11.0244	10.8337	5.80735	10.1344	11.7249	12.4828	6.10852	4.85798	7.30378	11.1072	6.71425	15.7947	9.27146	12.5694	12.4569	12.8194	9.77808	10.7364
						TCGA-BLCA	TCGA-XF-A8HB	0	1370	unknow	50	0	1	12.5169	5.67243	10.796	5.08746	9.85175	12.9281	11.5864	11.3554	10.9758	7.97154	12.5474	13.0936	11.1267	10.3674	11.8364	12.74	10.9816	6.79442	10.5546	11.8357	13.3813	7.54689	6.04439	8.45533	11.239	5.45943	17.2989	10.8218	13.3826	12.6591	14.4229	12.623	10.9129
						TCGA-BLCA	TCGA-YF-AA3L	0	364	unknow	47	0	1	10.5088	7.02237	7.83289	6.84549	10.5765	12.6711	11.0258	9.62388	11.713	4.90689	10.8549	11.2336	10.7372	2.32193	9.22641	8.78463	11.6138	7.85175	10.2992	10.5651	12.284	8.44294	5.64386	7.49185	10.568	9.11634	15.0907	9.43463	10.5353	10.9285	13.6712	9.11894	10.7022
						TCGA-BLCA	TCGA-UY-A8OC	1	92	white	90	1	2	10.1636	10.6348	8.08746	6.61471	11.3576	11.7368	11.8106	9.48784	10.4778	6.70044	11.5901	11.643	12.1434	1	11.0708	12.4284	10.7117	8.26679	10.3354	10.7756	12.3796	7.93664	9.44915	9.05799	9.71081	7.06609	17.2639	8.77149	11.2336	11.973	13.6066	11.3723	10.8431
						TCGA-BLCA	TCGA-GC-A6I1	1	272	white	90	0	1	10.6733	10.8811	10.6777	4.32193	10.8065	13.3059	12.6662	9.69174	11.0788	6.58496	12.0192	12.1092	12.3796	5.35755	10.9901	12.4391	10.8098	6.90689	10.7549	12.2831	12.8851	7.55459	5.88264	7.3837	11.1306	5.45943	16.9016	9.49386	11.544	12.5904	14.3467	14.5206	10.1649
						TCGA-BLCA	TCGA-GU-A762	1	232	white	87	1	2	9.79279	10.1344	10.7748	6.12928	10.611	13.098	11.7524	10.0417	11.1818	7.2384	12.1665	11.7056	10.0265	3.80735	11.3471	12.0481	11.2131	8.27146	11.178	11.7043	13.0751	9.50184	6.42626	7.9542	10.7125	5.35755	16.5415	9.50383	12.8362	12.8343	14.2762	15.5303	10.1712
						TCGA-BLCA	TCGA-DK-A3IK	1	146	white	87	1	2	10.5147	8.224	8.97154	7.96578	11.4898	13.2213	12.372	9.45533	11.6631	6.97728	11.6434	12.0192	12.6278	3.90689	10.5088	10.7448	10.4346	8.07682	11.014	11.2276	12.3393	8.08215	8.40088	9.35094	10.7985	8.21917	15.3937	9.16993	10.7574	9.74483	13.1746	10.3219	11.8646
						TCGA-BLCA	TCGA-DK-A3X2	1	547	white	85	1	2	12.5294	8.22882	11.2408	6.47573	11.8553	12.2662	10.0098	12.0154	10.6751	7.71425	13.5122	12.4576	13.4596	6.12928	11.8349	11.576	10.7339	6.78136	11.4142	11.5651	13.9848	7.5157	5.2854	9.01959	11.9035	6.10852	16.4361	10.7566	13.0575	14.4817	13.5109	9.5216	12.2101
						TCGA-BLCA	TCGA-XF-A9SW	1	362	white	85	1	2	9.50383	8.17991	8.42626	10.8626	9.37069	10.2958	11.0168	8.84862	9.47371	4.9542	10.0741	10.6874	10.2981	2.32193	9.67243	9.90989	9.07682	9.94544	9.32418	9.96434	10.9106	9.42206	9.47776	9.79928	8.47168	8.28077	14.0503	7.80735	10.2773	9.65284	12.0512	10.3509	9.13955
						TCGA-BLCA	TCGA-G2-A2ES	1	1004	white	85	1	1	11.2527	8.83605	10.7764	4.39232	10.9285	12.8192	12.5594	10.7748	10.9211	6.26679	13.4196	12.7459	13.0818	3.16993	11.7082	12.2685	10.4041	8.74147	11.8494	13.0102	13.811	7.64386	8.02237	8.61471	10.2981	5.55459	16.9502	11.0954	12.1098	13.1312	14.5142	14.9914	11.8788
						TCGA-BLCA	TCGA-FD-A5BT	1	328	white	84	1	2	8.50383	9.04985	7.82655	6.91886	11.2366	12.7985	11.7636	7.59991	10.3197	7.72792	10.5784	10.5784	9.55842	1	10.032	12.6108	10.5018	9.40301	9.49185	10.446	11.1312	7.59246	8.87652	6.56986	8.76155	5.55459	15.9146	8.20457	10.8258	11.1427	13.0028	13.7709	9.60363
						TCGA-BLCA	TCGA-CU-A0YO	1	149	white	84	1	2	10.5641	8.03342	9.45327	10.4305	9.90539	12.0241	12.3112	9	10.1586	7.15987	11.6271	11.7899	13.082	3.16993	9.91439	12.2773	9.56415	7.9542	10.5294	10.6555	11.5765	8.90689	8.26679	9.4818	9.92926	8.2384	16.2125	8.60733	11.5793	10.6707	12.2506	11.2306	9.46964
						TCGA-BLCA	TCGA-CU-A0YR	1	460	white	83	1	2	10.7168	9.1472	10.0821	7.83289	9.98584	11.7809	11.3437	10.3696	10.5469	9.48985	12.5563	12.3437	11.8933	6.24793	10.2691	11.0808	10.0701	8.2384	10.102	10.8329	13.0452	6.45943	7.59991	8.40514	9.45121	6.75489	15.6869	10.0688	11.2848	12.3435	13.8722	12.1718	10.5708
						TCGA-BLCA	TCGA-XF-A9SJ	1	98	white	83	1	2	9.59619	12.5833	9.76653	10.5157	10.2408	12.7408	11.9578	9.32643	11.1364	9.69174	12.3253	12.5459	13.0346	3.58496	11.0382	13.1194	11.7859	8.3966	10.0782	11.9567	12.1605	7.96578	7.70736	8.13955	9.34873	6.65821	16.6633	8.89785	11.3772	12.7848	13.6508	13.1464	10.403
						TCGA-BLCA	TCGA-S5-A6DX	1	56	white	83	1	2	8.68299	9.86573	6.94251	8.10329	10.8178	14.245	12.3974	7.44294	10.6591	8.20457	10.1202	10.643	8.25267	3.45943	9.49386	10.9469	12.2273	8.17493	9.90238	10.6537	11.5187	7.56986	7.19967	7.80735	10.4798	7.16993	15.5836	7.41785	9.75822	10.9873	13.7601	13.5476	9.19967
						TCGA-BLCA	TCGA-K4-A4AC	1	278	white	83	1	1	10.9651	10.4878	10.3619	6.61471	11.1668	11.8451	12.1251	9.24555	10.2192	4.32193	11.988	12.1843	11.2738	3.32193	11.4702	12.919	10.6944	6.10852	11.1762	11.8254	12.9105	6.80735	6.30378	6.76818	11.6883	5.08746	16.9079	9.51373	12.5601	12.3982	13.5178	14.2165	11.8317
						TCGA-BLCA	TCGA-SY-A9G0	1	1008	white	82	1	2	10.5498	8.27612	10.2912	10.9929	10.5507	11.412	11.2131	9.1472	9.80252	8.07682	11.1812	11.2027	10.7091	3.80735	9.79279	11.9009	8.77479	9.76487	9.80735	10.23	11.7368	9.54496	9.73302	10.6724	10.5774	8.80413	14.4874	8.93074	10.3955	9.55075	11.0627	10.5793	9.76155
						TCGA-BLCA	TCGA-ZF-A9R0	1	680	white	82	1	2	10.0647	7	9.07414	9.02514	11.1254	12.3813	11.2456	8.45533	10.0967	11.1699	10.7228	10.6528	11.6018	3	9.88874	10.792	9.69523	5.88264	9.99294	10.7211	11.1421	6.61471	6.14975	8.18488	9.98442	9.62936	15.1263	8.34873	10.3106	10.2131	11.6578	11.0217	9.66
						TCGA-BLCA	TCGA-XF-A9SV	1	388	white	82	1	2	10.6944	8.61839	7.14975	5.04439	10.3083	12.0624	11.3592	8.91588	9.90989	6.90689	10.2515	10.9993	10.4294	1	10.1447	8.81698	9.45533	6.30378	9.0634	9.48583	11.6479	5.90689	6.61471	7.20945	9.79279	6.42626	14.9837	8.10329	10.5245	14.9726	11.9862	9.27845	8.08746
						TCGA-BLCA	TCGA-DK-AA75	1	340	white	82	1	2	8.63662	8.98868	7.97154	5.39232	10.3083	12.7597	11.7398	8.64746	11.2186	5.90689	10.7764	10.4325	9.79766	2.32193	9.82972	12.0587	11.4471	6.39232	9.56224	10.5565	12.7777	6.42626	5.61471	6.74147	10.585	5.24793	14.6698	8.47978	10.2288	10.2228	12.2718	7.93074	10.2808
						TCGA-BLCA	TCGA-FD-A5BX	1	173	white	82	1	2	10.275	9.31967	9.67948	8.38802	11.1824	12.6344	11.9915	8.66534	10.5275	2.58496	11.0761	10.8273	9.42417	0.01	10.716	12.0802	9.99152	10.0741	8.80413	11.2935	11.6542	9.07948	8.89482	6.90689	8.90087	9.15735	16.8535	8.29921	10.4676	10.6644	12.3877	12.1248	9.53138
						TCGA-BLCA	TCGA-GU-A767	1	144	white	81	1	2	9.67772	9.17493	9.62205	9.38586	10.9001	13.6981	11.4833	9.2854	11.0868	5.55459	12.3208	11.6466	10.7532	2.80735	9.33539	11.3696	11.2656	9.7211	10.2009	11.3225	13.2906	10.0848	7.47573	8.45533	9.5216	8.33092	15.5492	8.88264	10.9388	10.7665	13.4757	11.357	10.1886
						TCGA-BLCA	TCGA-XF-AAMZ	1	1348	white	81	0	2	9.99152	8.11894	9.51964	6.79442	9.83763	12.1059	10.973	10.703	10.388	7.47573	11.3253	11.6425	11.8126	1.58496	9.57743	10.7624	9.99152	7.35755	9.7211	11.2703	13.1545	6.80735	5.88264	7.72792	9.74987	5.58496	15.1888	9.79928	10.875	11.8404	12.3837	9.53138	9.93958
						TCGA-BLCA	TCGA-BT-A20P	1	544	white	81	0	2	9.13186	7.29462	8.13443	5.08746	10.1712	12.5245	10.9823	8.13955	10.3576	5.52356	9.68299	10.42	11.5459	1.58496	10.1459	10.5098	10.8918	6.44294	9.67243	10.2854	12.0238	6.50779	6.65821	7.86419	9.66356	8.71768	16.1199	7.85175	10.1085	10.2761	12.851	10.3242	8.74819
						TCGA-BLCA	TCGA-XF-A8HF	1	2954	white	80	1	2	10.4543	9.71253	8.65821	7.91289	10.7499	12.7356	12.0587	9.42206	11.5309	9.71425	11.227	11.6239	10.4553	4.52356	9.62022	11.3348	11.363	7.26679	10.6724	11.6325	12.2167	7.05528	7.54689	8.0607	9.31967	6.18982	14.7673	9.09276	10.4737	11.5406	12.7509	10.9218	9.70736
						TCGA-BLCA	TCGA-XF-AAMH	1	344	white	80	1	2	9.13699	9.19967	7.62936	5.42626	10.6952	13.2643	12.7738	7.89482	10.9418	7.33985	11.1098	11.258	11.0341	5.16993	9.81378	11.4548	12.0074	7.46761	9.83289	11.7566	13.0641	7.80735	7.64386	11.6013	10.1176	8.17493	15.8498	9.02237	11.6777	11.2064	13.11	10.7574	10.332
						TCGA-BLCA	TCGA-4Z-AA81	1	1270	white	80	1	1	9.03892	11.7125	9.55267	2.80735	9.25739	11.5584	11.7309	9.67948	10.4798	9.35094	12.7532	12.1092	14.0408	7.63662	10.5981	12.3424	10.5906	5.70044	11.0532	11.6965	12.3208	3.70044	3.70044	6.04439	9.99435	2.58496	16.3319	9.29002	12.3974	13.0992	12.9633	12.5981	10.6671
						TCGA-BLCA	TCGA-BT-A3PK	1	303	white	80	1	1	10.5746	10.6609	11.9622	5.16993	11.8956	12.5333	12.3103	10.9484	11.4476	9.16993	13.0005	13.3929	13.453	5.08746	12.0848	13.1459	11.5732	10.3674	11.6658	12.0498	13.8606	9.74987	10.2503	10.4717	10.341	8.42206	16.9711	10.4543	12.5348	13.9222	13.954	14.5702	12.9164
						TCGA-BLCA	TCGA-DK-A2HX	1	1420	white	80	0	2	10.9352	8.29002	10.3826	10.567	10.7108	11.3729	11.883	10.7432	10.444	8.70044	11.5817	12.5661	13.7141	8.50779	10.888	11.7249	9.7211	9.45327	10.5118	13.4617	11.7855	9.56986	8.79116	10.8098	9.65642	9.21917	16.7499	8.84549	11.8126	11.7703	12.8265	11.1687	9.56796
						TCGA-BLCA	TCGA-FT-A3EE	1	99	white	80	0	2	11.7694	10.875	12.795	7.8009	12.1759	14.0782	13.776	10.1984	11.9181	10.6926	13.0833	13.0086	14.9027	3	11.4848	13.8929	11.7801	8.7039	12.128	13.0995	14.1712	7.82655	8.3443	9.05257	11.0498	7.59991	17.2209	11.1072	12.312	13.1212	13.8857	12.5701	11.4083
						TCGA-BLCA	TCGA-FD-A6TF	1	69	white	80	0	2	10.196	8.64746	11.3449	10.0444	11.1536	12.3205	12.4745	9.98726	11.2101	9.44915	12.0593	12.5868	11.7871	3.90689	10.9091	14.2269	11.5689	10.7797	11.0875	13.077	13.5949	9.47168	9.27612	10.043	9.49785	7.59991	16.4297	9.98157	11.9993	12.2258	13.109	11.5118	10.6636
						TCGA-BLCA	TCGA-UY-A78N	1	2641	white	79	1	2	11.1749	9.53528	10.2119	8.53528	10.7013	12.0067	11.4435	10.0238	11.3658	10.5906	12.4442	13.0629	11.4979	2.58496	11.8443	12.512	11.6904	7.24793	10.8502	11.941	13.2012	7.2384	7.58496	9.58684	11.4252	6.61471	15.7758	9.74987	12.9224	13.115	13.9222	9.90388	9.91439
						TCGA-BLCA	TCGA-XF-A9SZ	1	859	white	79	1	2	9.59619	9.85798	8.7039	7.91886	10.8353	11.9647	11.722	9.49985	10.9901	7.84549	11.6948	12.1056	13.4293	2.58496	9.37938	12.013	10.3912	9.10852	10.2384	12.0828	11.3614	7.97154	7.73471	7.92481	9.56224	5.70044	15.6862	8.60733	10.6257	11.6087	13.0147	10.8162	11.6922
						TCGA-BLCA	TCGA-GV-A3QF	1	617	white	79	1	2	13.526	7.56224	10.0056	10.0098	12.2868	12.0898	12.5058	9.98868	11.144	6.85798	12.0423	11.2644	12.7011	6.67243	10.825	11.7528	10.8665	8.10852	9.66356	12.3644	13.3595	7.74819	6.65821	7.62205	11.7895	10.3718	15.9544	9.66356	11.2779	11.4594	13.5147	10.2784	10.5736
						TCGA-BLCA	TCGA-4Z-AA7Q	1	510	white	79	1	2	10.9196	9.9901	10.0265	7.10852	10.865	11.8086	11.3966	9.68124	10.062	7.48382	11.2426	12.1225	11.7448	1.58496	10.4073	10.0607	10.5226	7.05528	10.4325	11.4409	12.0546	7.62205	4.9542	7.70044	9.81538	5.72792	16.0137	9.31061	11.1325	12.3089	12.9108	14.0709	10.3826
						TCGA-BLCA	TCGA-DK-A1A5	1	65	white	79	1	1	11.4656	9.72962	10.0768	7.62205	11.3587	12.117	12.3718	11.0961	10.7039	4.58496	12.357	12.5727	12.6393	3.70044	11.6795	10.6707	10.5058	7.84549	11.0775	12.2562	13.784	8.33985	8.29921	9.89178	12.5976	8.31741	17.8349	11.0741	12.6795	12.4097	13.2835	12.0911	10.1254
						TCGA-BLCA	TCGA-DK-A3IL	1	413	white	79	0	2	10.1319	6.62936	9.47168	9.32193	11.5498	13.1424	11.7707	9.3443	11.0505	8.21432	11.733	11.9073	12.4584	2.80735	10.4574	11.6891	11.3214	7.42626	10.6101	11.2479	12.9945	8.04439	7.40939	10.0634	9.91588	7.04439	15.3363	9.36632	11.1724	11.0954	13.5218	9.60363	10.4336
						TCGA-BLCA	TCGA-ZF-AA56	1	259	white	79	0	2	11.1	9.02237	11.0748	6.76818	11.1687	12.5736	12.3112	9.60177	10.9951	7.82655	12.3298	12.8045	13.8067	9.66888	11.0471	11.6083	9.9629	8.51175	11.137	10.4429	12.9185	8.50779	9.40939	9.01123	11.5382	7.97154	17.0779	9.53722	12.5857	13.2408	14.5282	13.3526	10.3977
						TCGA-BLCA	TCGA-XF-AAMW	1	253	white	79	0	2	9.64386	8.8857	10.0901	5.42626	10.7616	11.4934	11.1306	9.41151	10.043	6.02237	11.6321	11.2935	11.0348	6.14975	10.2288	11.9596	10.0084	6.44294	10.23	10.7228	12.0647	7.67243	7.22882	7.53138	10.9687	5.20945	16.6758	8.75154	11.2538	11.5245	12.8242	13.533	9.31967
						TCGA-BLCA	TCGA-BT-A20R	1	154	white	79	0	2	11.9506	8.85487	9.35315	8.24793	10.7279	12.3867	12.719	10.1007	10.8603	7.59991	11.446	12.4836	12.341	2	11.1389	11.4717	10.5058	9.02237	10.8439	12.4051	12.3639	8.80735	9.633	9.45533	10.7151	8.52356	15.7725	9.12928	11.5314	11.9951	13.2584	11.7952	9.70563
						TCGA-BLCA	TCGA-DK-AA6W	1	415	white	78	1	1	10.9556	8.66534	11.1605	8.45943	11.1567	12.192	12.6562	10.6555	11.1434	7.64386	12.4795	11.4543	13.1625	3.58496	10.1573	11.9883	10.9636	6.9542	9.49185	11.1241	15.1888	7.47573	6.90689	11.7781	11.3015	6.18982	15.2922	11.8301	12.9146	12.6486	12.4396	10.2958	11.363
						TCGA-BLCA	TCGA-BT-A2LD	1	623	white	78	0	2	9.23122	8.51964	11.2033	7.62936	10.3891	11.9766	12.3837	9.18982	11.6188	11.0049	11.4681	11.3471	11.3146	1.58496	10.8194	12.7207	10.6935	7.60733	10.3354	11.2204	11.8114	6.94251	7.45943	10.585	11.4226	5.58496	15.942	8.72451	11.7764	12.2929	12.5336	12.3617	10.5718
						TCGA-BLCA	TCGA-ZF-A9RE	1	106	white	78	0	1	10.8773	9.33985	10.6147	4.9542	10.6627	11.4993	10.6393	9.98868	9.76653	9.50779	12.2285	13.0025	15.367	7.50779	11.0634	11.7969	9.29692	6.49185	9.96434	10.3923	12.6186	6.16993	5.97728	7.49185	9.91886	6.18982	16.9655	9.60177	12.2709	12.4507	12.8098	11.545	10.7756
						TCGA-BLCA	TCGA-FD-A6TD	1	386	white	77	1	2	10.2691	11.7317	9.50581	6.24793	10.9454	12.0529	12.0637	9.74651	11.0307	4.39232	11.9733	11.6684	11.8765	6.82018	11.9611	12.9869	11.3454	8.49185	10.9144	11.1007	12.9431	7.81378	7.69349	8.27612	10.96	6.22882	16.5099	9.91289	11.8884	12.5316	14.4631	12.8096	10.7271
						TCGA-BLCA	TCGA-G2-A2EL	1	819	white	77	1	1	11.9106	10.0112	9.96578	6.72792	12.8441	12.438	12.4924	12.3202	10.4105	4.9542	12.7	13.8002	12.9133	5.9542	12.5819	10.9809	11.1383	7.01123	11.168	11.2586	15.3809	6.59991	7.31288	10.2633	12.4411	7.73471	16.4771	12.2204	14.7201	13.6398	12.5941	9.98442	11.8865
						TCGA-BLCA	TCGA-FD-A5BZ	1	835	white	77	0	2	10.5459	7.70044	10.2046	8.64386	10.9816	11.4067	11.5656	9.71768	10.6101	6.55459	11.5873	10.9099	11.5152	2.58496	9.80896	11.3821	9.35975	8.66534	10.0941	10.7099	11.6124	8.46761	9.10591	9.35755	10.0647	8.54303	15.708	8.99152	10.4019	11.2906	11.5878	11.4512	9.60548
						TCGA-BLCA	TCGA-XF-AAN4	1	823	white	77	0	2	10.3421	8.65105	9.76487	11.7112	10.0914	10.8933	11.2234	9.29921	9.91886	5	11.0974	11.0417	10.1898	4.64386	10.3805	11.2533	8.91886	9.70563	9.88417	9.75822	11.4625	9.68475	9.30606	10.7936	9.33316	9.05799	14.6512	7.9542	10.6555	10.7977	12.5018	12.5282	9.76984
						TCGA-BLCA	TCGA-CU-A72E	1	413	white	76	1	2	11.5304	9.45533	10.2095	7.98299	11.5058	13.2411	12.5805	10.0795	11.2574	7.39232	12.0498	11.722	12.4165	10.5459	11.6627	11.7245	10.9687	7.32193	10.6733	11.5784	12.9764	7.19967	8.30834	8.84235	9.88874	6.18982	17.3878	9.39874	11.9986	12.1886	14.5899	12.6506	11.196
						TCGA-BLCA	TCGA-DK-A3IM	1	248	white	76	1	2	11.4959	10.2656	10.0028	3.90689	11.3966	13.6152	12.7347	9.50383	10.8017	9.54496	13.6981	14.1944	14.1862	3	12.5157	11.7155	11.6239	5.35755	10.733	12.3432	14.1884	8.39232	5.72792	7.7211	11.5892	5.04439	16.6007	10.6421	13.1201	13.5291	14.9143	12.6043	12.3479
						TCGA-BLCA	TCGA-BT-A3PH	1	142	white	76	1	2	10.1935	7.15987	10.6421	5.35755	11.1768	12.9044	12.2213	10.1774	10.8041	11.3072	11.9542	12.3426	13.5459	2.58496	10.4868	11.4147	10.5736	8.82018	10.9593	11.4969	11.5073	8.49185	6.83289	8.25739	11.0821	6.70044	17.5467	8.81057	12.6278	13.3257	13.1154	11.8269	10.7846
						TCGA-BLCA	TCGA-FD-A62P	1	191	white	76	1	1	9.03617	10.9794	9.71081	8.29002	11.0674	12.7908	11.8846	8.97441	10.4189	9.59619	12.5445	11.9755	11.6133	4	11.0362	13.1542	10.115	7.52356	10.3253	11.2258	11.8333	8.31741	7.44294	7.97728	10.0674	7.09803	16.229	8.29462	11.041	12.043	12.5694	12.2015	11.0341
						TCGA-BLCA	TCGA-5N-A9KI	1	76	white	76	0	2	10.8948	7.87036	9.65821	8.61839	11.0895	12.8761	12.2802	9.59805	10.9866	8.13443	11.6604	12.713	13.4442	8.59991	10.7194	12.3641	9.94837	8.61102	10.7465	12.1765	12.0684	8.09803	7.59246	9.31288	9.67596	6.80735	16.3592	8.46761	11.1504	10.9506	13.9696	12.6959	10.0661
						TCGA-BLCA	TCGA-BT-A20O	1	370	white	75	1	2	11.2438	9.59991	11.1427	6.97728	11.3026	11.6689	12.8918	10.8673	10.1886	2.58496	12.275	11.9647	10.7723	8.37069	11.1536	11.9951	10.599	8.57365	10.4778	11.1085	13.0599	8.75489	7.33092	9.04439	11.592	7.41785	16.5465	9.99435	12.1405	12.5122	14.7172	14.017	10.9887
						TCGA-BLCA	TCGA-GU-AATO	1	324	white	75	1	2	10.3718	7.92481	9.26444	6.49185	9.99859	11.9611	11.3554	9.38586	10.5421	6.10852	10.375	11.6528	11.544	3.70044	10.6627	9.2503	10.4707	6.39232	8.71081	11.4398	11.5469	6.22882	5.35755	7.85175	9.83131	5	15.9758	8.08215	11.4083	11.9385	12.2938	11.9669	8.97441
						TCGA-BLCA	TCGA-BT-A0S7	1	200	white	75	1	2	10.4179	8.9571	10.4522	7.09803	9.54689	11.8455	11.5464	9.83763	9.63481	7.44294	11.5718	11.7553	11.6667	2	10.4919	11.2627	9.91439	9.01123	10.0028	11.3281	12.6504	8.64386	6.98868	9.00562	8.32193	4.9542	14.4305	9.83447	12.0334	12.0258	11.2639	9.45738	10.6202
						TCGA-BLCA	TCGA-FD-A3B6	1	1005	white	75	1	1	10.7723	8.84235	11.0286	2.32193	11.102	12.8198	12.9791	10.4491	11.275	6.72792	13.229	13.2348	11.7682	9.59619	11.7936	12.2192	11.4903	8.45533	10.7356	12.4393	13.768	7.9542	6.20945	8.29002	10.4491	7.22882	17.4709	10.7134	12.93	13.4439	13.3997	13.1217	10.9054
						TCGA-BLCA	TCGA-BT-A20J	1	579	white	75	1	1	13.5798	9.34873	9.9263	7.33985	12.0891	11.8711	12.247	9.88722	10.4888	2.32193	11.255	12.4597	10.8234	8.9542	10.3454	12.3018	9.35755	9.50581	10.6448	11.5348	12.9476	6.85798	5.75489	8.61471	9.2384	5.58496	15.0357	9.82018	11.3376	11.368	13.3359	12.7228	13.0131
						TCGA-BLCA	TCGA-GV-A40E	1	261	white	75	1	1	9.96434	11.1731	10.7262	4.64386	11.6978	12.729	12.6676	10.3015	11.6817	10.3117	12.7015	12.1526	11.8285	8.23362	11.8545	14.0551	11.7279	6.24793	11.4383	11.9035	12.8576	9.99152	6.44294	8.47978	9.85331	5.83289	16.4887	10.2252	12.1529	13.2599	14.4752	14.0599	11.1929
						TCGA-BLCA	TCGA-XF-AAML	1	232	white	75	1	1	11.2312	7.26679	9.87805	5.58496	9.88111	11.5957	11.623	9.88417	10.445	4.75489	11.1085	11.9407	12.5061	1.58496	9.82972	11.819	10.5803	5.61471	10.0224	11.0293	12.0464	5.2854	3.32193	6.96578	11.6751	5.88264	15.026	8.69349	11.3832	12.3971	12.2384	10.4168	10.375
						TCGA-BLCA	TCGA-ZF-A9RD	1	408	white	75	0	2	9.10852	11.2744	8.43045	5.70044	9.16491	11.0848	11.5073	8.70044	9.91289	6.02237	10.5897	11.4737	11.0895	8.59246	11.2503	11.5579	10.2538	6.64386	10.7846	10.0861	11.6312	6.20945	5.93074	6.71425	9.77314	5.80735	16.0712	8.37069	11.3864	12.1596	14.3997	12.588	9.87805
						TCGA-BLCA	TCGA-XF-AAMT	1	90	white	75	0	2	10.8773	9.89482	10.744	8.52356	11.431	12.1621	12.5915	9.30606	10.8719	2.80735	12.0515	12.3476	11.9929	5.9542	12.1131	12.4551	10.2009	9.20212	11.2644	11.2975	12.5817	9.30834	8.49985	9.69	10.5167	7.56224	16.8391	9.23362	12.4349	11.6733	13.5156	12.7482	10.1137
						TCGA-BLCA	TCGA-DK-A3IQ	1	539	white	74	1	2	9.89936	9.56033	9.5157	10.2562	11.1843	12.0461	11.8903	9.22641	10.4398	5.70044	10.6036	11.3343	11.1718	6.55459	9.783	11.6357	9.91139	9.25739	9.15735	10.2252	11.6266	9.60177	9.32867	10.6546	9.76653	9.05257	16.5494	8.73809	10.8001	10.4305	12.2076	11.431	9.61287
						TCGA-BLCA	TCGA-FD-A62O	1	216	white	74	1	2	10.8502	8.64024	9.15228	7.60733	11.2438	11.8106	13.2469	8.51175	10.7482	7.06609	11.9185	11.7469	12.4105	2	10.7814	12.0792	9.72962	7.10852	10.3465	10.1072	12.7482	7.2854	8.27612	7.76818	10.941	9.29921	15.4143	9.62936	11.446	10.7296	12.4019	10.2784	9.68825
						TCGA-BLCA	TCGA-FD-A3B3	1	974	white	74	0	2	11.346	10.6348	10.7151	8.47573	11.5454	13.0924	12.8973	10.6008	10.5265	5.2854	13.4827	13.5958	13.0622	6	11.592	12.7812	11.0471	8.89785	11.6243	12.9685	13.4236	8.66178	9.02791	9.37938	11.8838	8.06609	16.8999	10.0928	13.9204	13.9629	13.9808	14.0479	10.9218
						TCGA-BLCA	TCGA-DK-A1AB	1	508	white	74	0	2	11.8502	11.764	10.7364	9.03892	11.403	12.6819	12.3987	10.3912	10.6384	8.67596	13.0345	12.168	13.6509	4.64386	11.6843	11.2703	9.02791	7.5157	11.9054	11.7237	12.9267	8.10329	8.62205	10.1228	10.891	8.32643	17.7359	10.4594	11.7657	12.0831	14.1363	13.8211	10.0808
						TCGA-BLCA	TCGA-XF-A9SU	1	182	white	74	0	2	9.59246	10.1874	8.37069	8.73471	10.6564	12.8995	11.1267	8.34873	10.6537	7.83289	11.0855	11.381	10.3163	2.32193	9.94398	11.9979	10.8696	8.21432	10.2889	10.4491	12.0715	7.74147	8.07146	8.0607	10.352	7.37504	15.266	8.61102	10.6046	11.1643	13.1961	11.6511	10.0154
						TCGA-BLCA	TCGA-XF-AAN8	1	118	white	74	0	2	9.10591	9.25267	9.53138	8.3837	10.944	10.9658	10.0701	8.18982	9.17991	4.70044	10.4898	10.5372	10.952	3.32193	9.53722	11.1059	9.14975	11.1137	8.93369	9.41574	10.9418	10.1007	9.11894	8	8.60733	7.97728	14.1355	8.40514	9.20701	7.37504	12.0798	12.1674	10.2644
						TCGA-BLCA	TCGA-BT-A20Q	1	593	white	73	1	2	11.1978	9.90388	9.20212	7.87036	10.7682	12.1186	12.0997	9.94398	10.545	6.10852	11.5751	11.5299	11.7744	6.02237	10.6239	10.102	10.0688	6.91886	9.90839	10.8146	12.1948	7.62936	7.80735	9.80413	10.5353	9.33985	16.7953	9.25503	11.2592	10.3476	12.9383	12.9313	9.03067
						TCGA-BLCA	TCGA-FD-A6TI	1	294	white	73	1	2	12.3126	6.08746	9.62022	8.633	10.9366	13.5148	13.1917	9.61655	10.9076	5.08746	11.8025	11.9848	13.1505	4.08746	10.4828	11.5078	11.0788	8.26679	10.4062	11.3548	12.4252	8.97154	7.2854	9.56224	10.4949	8.82972	16.8469	8.7211	11.7104	10.0084	12.7249	12.7283	8.94251
						TCGA-BLCA	TCGA-FD-A6TG	1	93	white	73	1	2	9.75822	9.89026	10.4533	11.0641	11.1261	13.6546	12.0227	9.69	10.84	10.7142	12.4401	11.769	12.1102	4.32193	9.61655	12.0671	10.2935	8.74147	10.3718	11.6667	12.061	9.08215	7.9542	9.84862	9.59059	8.31288	16.3673	9.12412	11.5779	12.2618	12.5152	12.8076	10.3652
						TCGA-BLCA	TCGA-XF-AAN2	1	1869	white	73	1	1	9.90839	8.29921	10.3966	5.52356	9.53916	11.5699	10.7698	9.47776	9.76653	7.88874	11.8757	12.152	12.1507	3.16993	10.8194	11.0928	9.89785	5.08746	10.8918	11.7065	12.2258	4.80735	5.04439	8.13955	9.80574	4.08746	15.2243	9.43879	12.3267	12.3038	13.4497	12.8345	9.62753
						TCGA-BLCA	TCGA-4Z-AA80	1	19	white	73	1	1	11.5411	6.47573	8.87958	4.08746	10.1059	11.3869	11.9465	10.8887	11.1085	5.35755	11.865	12.0858	12.2718	4.75489	10.352	11.2125	10.7099	6.32193	10.5285	11.4455	13.1808	5.64386	5.20945	6.82018	11.785	5.75489	14.8816	9.92926	11.9705	12.1424	12.4846	9.82814	9.58496
						TCGA-BLCA	TCGA-5N-A9KM	1	530	white	73	0	2	10.891	6.91886	9.21675	6.06609	10.9737	12.4821	13.0234	9.81218	11.6475	5.58496	11.4003	11.6524	11.4828	5.42626	11.7377	10.6777	11.0119	6.94251	10.4284	11.0674	12.128	7.31288	6.53916	9.3015	11.5589	11.2438	16.5546	8.71425	10.7279	10.2264	12.3902	12.5746	8.96578
						TCGA-BLCA	TCGA-BT-A2LB	1	492	white	73	0	2	11.2889	9.62205	11.3083	8.44294	11.7541	12.7622	13.4059	9.77808	11.7636	7.96	12.3407	11.6193	12.032	3.16993	10.8009	12.6642	10.6502	8.34873	11.4067	11.7903	12.5113	8.73132	8.10852	9.15735	10.8361	6.33985	16.2682	9.10591	12.363	11.7653	13.4564	14.644	10.2981
						TCGA-BLCA	TCGA-GU-A42P	1	332	white	72	1	2	12.2787	7.76155	9.21189	6.90689	10.4019	12.0441	11.5632	10.9248	10.774	7.56224	12.7377	12.8508	12.0519	6.04439	11.0573	11.1737	10.8849	8.91588	10.8329	12.1202	13.5286	8.79766	8.02237	8.9542	12.8065	7.36632	16.1125	10.4757	12.8394	11.9894	13.0901	9.9571	10.1421
						TCGA-BLCA	TCGA-DK-A3IN	1	250	white	72	1	2	11.7061	11.6096	11.3078	6.6865	11.5003	12.3791	13.1015	9.90087	11.056	7.08746	11.9958	12.0382	11.9155	3.16993	11.7503	13.4124	10.7871	11.1286	10.5177	11.9596	12.6085	7.86419	7.93664	9.44087	11.4661	8.14975	16.0118	9.92035	11.9222	12.5618	13.7505	13.0522	10.8289
						TCGA-BLCA	TCGA-ZF-AA54	1	590	white	71	1	2	10.1548	8.51964	10.9491	6.82018	11.4263	12.2073	12.5147	9.54882	10.8265	0.01	12.474	12.5831	11.8474	9.55075	11.432	11.9121	10.8439	9.39017	9.91588	11.6188	13.3299	8.31288	7.86419	7.5157	9.76487	6.50779	16.7664	9.72281	12.2995	13.1296	12.2384	13.0578	10.9061
						TCGA-BLCA	TCGA-YC-A9TC	1	20	white	71	1	2	12.0468	8.15482	10.4502	12.6771	11.4445	13.3401	13.6072	9.98014	11.2998	7.20945	12.2641	11.9633	11.5488	4	11.2119	12.726	11.543	6.70044	10.774	11.6653	14.0348	6.83289	6.49185	9.87498	9.5216	7.60733	17.3682	10.5324	12.0597	12.0553	16.3687	11.314	12.4924
						TCGA-BLCA	TCGA-BT-A20W	1	254	white	71	1	1	10.5546	8.2384	10.0307	6.78136	10.5018	11.7457	12.0721	9.70217	11.137	8.49985	11.8037	11.4357	11.3449	2	10.207	10.8865	9.58871	8.2384	10.1812	11.0105	12.5946	8.45121	7.96578	9.07948	10.0224	8.30378	14.937	9.43879	11.1954	11.2761	13.1567	9.95565	9.77972
						TCGA-BLCA	TCGA-ZF-AA52	1	1077	white	70	1	2	9.21432	7.35755	9.04166	9.18239	11.1312	12.3095	11.9204	9.50581	10.5661	7.10852	11.2149	11.9812	9.79442	6.39232	10.0403	12.2297	10.3015	8.24793	9.59991	10.9418	11.7826	8.11374	8.08746	9.02791	10.4543	6.70044	15.3483	8.65464	10.3674	10.29	12.7948	11.9676	10.1649
						TCGA-BLCA	TCGA-FD-A3SM	1	547	white	70	1	2	11.4035	8.14466	9.89785	6.12928	10.9535	12.4745	13.0241	10.4584	10.4491	7.64386	12.3396	11.4848	13.116	5.58496	10.7674	11.5641	9.65105	8.03342	9.63844	11.3493	12.006	7.88874	8.53528	9.66	10.0993	7.04439	18.2362	9.39874	11.5382	12.179	14.362	12.9634	9.72962
						TCGA-BLCA	TCGA-ZF-AA4U	1	262	white	70	1	2	11.0112	9.03617	9.02237	4.52356	11.0403	12.4268	12.0158	9.69	10.8329	8.51964	12.3947	11.7305	12.1501	0.01	11.4409	11.4362	10.275	6.35755	9.91139	11.2796	12.9819	6.71425	5.72792	7.45943	10.6027	7.06609	17.1652	9.75822	11.0091	11.2444	13.6337	11.1447	9.94837
						TCGA-BLCA	TCGA-CU-A5W6	1	56	white	70	1	2	11.577	9.38802	8.9629	7.32193	10.7591	12.1376	11.5684	10.4615	10.9031	6.26679	11.4194	12.0711	13.0614	4.45943	10.6777	9.99859	11.3038	7.33092	10.6636	12.535	11.9869	7.79442	6.96578	8.04985	10.567	7.40939	16.2667	9.57743	11.2773	11.7448	13.3545	13.4467	9.7879
						TCGA-BLCA	TCGA-E7-A3X6	1	904	white	70	1	1	10.8673	8.93664	10.9129	5.67243	10.9694	11.9887	12.1558	10.0182	10.5784	7.29462	12.6273	11.8861	12.2228	3.70044	11.8525	11.6965	9.86264	6.67243	11.0627	11.2814	12.8156	7.56224	7.56986	8.13443	9.60733	7.48382	17.9855	9.97011	11.6996	12.8929	13.0382	13.696	10.7117
						TCGA-BLCA	TCGA-GC-A3BM	1	651	white	70	1	1	11.1849	9.224	11.1668	6.06609	11.7879	12.7956	12.5486	9.40727	10.5333	6.75489	12.8535	12.2998	11.8918	3.45943	11.3772	11.0021	9.65821	6.98868	10.6275	10.5981	13.0755	7.77479	7.40939	8.43463	10.7912	8.3966	17.0663	10.2408	11.4778	11.8792	12.4351	11.8906	10.3815
						TCGA-BLCA	TCGA-BT-A20U	1	455	white	70	0	2	10.5651	8.65821	10.3955	4.52356	10.5868	11.6804	12.0964	9.40939	9.67772	7.5157	11.9418	12.0147	12.4921	11.1351	10.2773	11.527	9.47573	6.49185	9.62022	10.3977	12.9125	6.02237	7.27612	8.40939	9.98726	4.85798	16.2436	9.96867	12.3055	11.4914	14.4851	10.6147	10.5401
						TCGA-BLCA	TCGA-BT-A0YX	1	400	white	70	0	2	11.0654	10.8711	10.6952	5.42626	10.567	12.7572	11.8941	9.7211	10.1548	9.42626	12.0365	12.7969	14.7959	7.65821	10.9844	11.9065	9.62205	6.74147	10.128	11.2568	12.8543	7.77479	6.93074	10.5285	10.7262	5.24793	16.8415	9.55075	11.9622	13.3934	15.2549	12.0987	10.4998
						TCGA-BLCA	TCGA-XF-A9SL	1	2020	white	69	1	2	11.0492	9.20701	9.47573	12.0244	10.544	11.8049	12.0765	10.0293	10.3837	7.16993	10.8704	11.4909	11.896	4.64386	10	11.3337	9.88874	10.4635	9.97585	10.332	11.5241	10.7185	8.49985	10.1586	10.098	9.15735	15.3856	8.20945	11.2473	10.374	12.2677	11.3696	9.9263
						TCGA-BLCA	TCGA-G2-A2EO	1	1804	white	69	1	2	11.0921	8.37938	7.99435	4.70044	11.0875	13.4556	12.5857	9.70736	11.403	4.90689	11.6671	11.8494	11.8329	3.70044	12.4171	11.7142	11.0768	7.90087	11.4414	11.4691	13.4118	6.97728	7.8392	8.55075	11.6004	7.69349	16.9149	10.0014	12.2276	12.1677	13.3284	12.0063	10.0782
						TCGA-BLCA	TCGA-XF-A8HG	1	467	white	69	1	2	11.5221	7.85798	9.56796	7.53916	10.7838	11.9982	10.3443	9.88264	10.6671	6.62936	11.1408	11.7262	12.2577	3	11.1948	12.2095	10.6439	4.75489	10.8956	10.544	12.2024	5.42626	4.32193	6.50779	11.7748	8.87344	14.1448	9.48583	11.0238	9.39446	12.0151	7.47573	8.83605
						TCGA-BLCA	TCGA-XF-AAN0	1	1718	white	68	1	2	9.88417	8.60733	11.4959	8.21917	10.8918	12.4684	12.4566	9.633	10.4757	8.90087	12.3332	12.8132	13.4002	3.58496	11.0293	12.0921	10.7237	8.12412	10.4656	12.3509	12.0372	8.64386	7.06609	9.46761	10.1787	7.8009	16.5645	8.86109	12.8055	12.8715	13.9782	12.5997	10.5689
						TCGA-BLCA	TCGA-FD-A3SR	1	602	white	68	1	2	10.9432	7.49985	11.1254	9.22159	10.7756	12.1908	12.9516	10.5372	10.3761	6	12.2246	12.127	10.2877	3.16993	10.0375	10.7781	9.02237	7.49185	9.42836	10.4798	12.178	8.3443	7	9.91289	10.2467	7.48382	15.5418	9.18488	11.4152	11.5836	11.8646	11.4383	10.988
						TCGA-BLCA	TCGA-GU-A42R	1	577	white	68	1	2	10.1241	7.76155	10.1674	7.40088	10.9091	11.5445	12.3805	10.2527	10.4221	6.44294	11.9001	11.5503	12.4841	5.42626	10.817	10.2021	10.69	8.633	10.6795	11.9374	12.5118	8.11374	7.06609	10.0098	10.7969	6.84549	17.2419	9.39874	10.7142	12.1453	13.0673	10.0028	10.4325
						TCGA-BLCA	TCGA-GU-AATQ	1	213	white	68	1	2	9.19967	8.96867	9.59619	6.39232	10.3465	11.2234	11.9333	8.82337	10.29	6.84549	11.3038	12.1874	10.3421	5.16993	10.8106	11.0701	9.8857	6.26679	9.88264	10.7177	12.4213	6.24793	5.20945	7.33985	9.27146	5.42626	16.1703	9.28309	11.4409	11.1033	14.0847	11.0272	9.82177
						TCGA-BLCA	TCGA-FD-A3SO	1	168	white	68	1	2	10.6987	9.71768	12.1734	5.24793	10.983	11.5343	12.8216	9.50383	10.2515	8.73809	12.1886	12.925	12.2527	6.62936	11.4062	12.7093	10.1935	11.7624	10.6211	11.8226	13.017	7.5157	7.97154	8.92481	9.80574	3.90689	16.4325	9.30606	12.8435	12.8192	13.4603	12.8206	11.7582
						TCGA-BLCA	TCGA-ZF-AA4R	1	1036	white	67	1	2	11.2615	8.86728	9.79604	5.80735	10.3095	11.7292	11.5206	10.1687	10.5392	7.27612	11.3009	12.2703	10.3772	0.01	11.2252	11.1079	9.31741	6.16993	10.0334	13.2365	12.2889	6.55459	7.08746	8.96	10.817	6.33985	15.5635	9.51175	11.9805	12.2467	12.4213	10.7389	10.7228
						TCGA-BLCA	TCGA-GU-A42Q	1	344	white	67	1	2	11.9593	10.8918	11.1273	6.52356	11.5915	12.837	12.7667	10.3264	10.96	8.92778	12.7127	13.2915	12.7684	11.2021	11.0098	13.9606	10.2969	5.93074	11.1787	11.5517	13.9112	6.04439	9.48784	8.17991	11.6321	5.2854	17.5607	10.9837	12.9708	12.7903	15.4883	13.4074	11.3918
						TCGA-BLCA	TCGA-GV-A3QH	1	258	white	67	1	1	11.2509	8.20945	11.1768	5.85798	10.7993	12.2119	12.6001	11.3168	11.0987	8.71768	12.2779	12.9138	14.4318	1	11.4737	12.1805	10.643	6.82018	11.858	11.4843	12.9407	6.49185	6.59991	11.1687	12.6558	7.03342	16.2041	9.783	12.4372	13.2139	12.9425	10.4147	10.8041
						TCGA-BLCA	TCGA-ZF-A9RN	1	615	white	67	0	2	10.5008	9.43671	13.0011	6.04439	10.3454	12.5601	12.6519	11.1415	11.3026	4.90689	12.0549	13.2033	7.07682	3.80735	10.6698	11.5152	10.5575	10.9542	9.37287	12.7584	13.0812	6.87036	6.22882	7.94837	11.9848	8.05528	15.5324	9.44294	12.7442	13.3163	13.2134	13.8025	11.8498
						TCGA-BLCA	TCGA-K4-A5RI	1	356	white	67	0	2	11.7061	10.3542	11.4205	7.80735	11.7048	12.7536	12.768	9.62936	11.4341	5.12928	12.4856	12.1611	12.2396	10.1344	11.911	12.4594	10.9211	6.50779	10.7381	11.7164	13.1908	7.08746	9.69	9.14466	10.6366	6.61471	16.7142	9.67419	12.3731	13.2257	15.2886	11.0848	10.4696
						TCGA-BLCA	TCGA-DK-A3WX	1	321	white	67	0	2	10.4221	10.3859	10.3151	5.04439	11.5162	12.1053	12.2095	9.73132	10.4263	8.37069	12.8212	11.8719	12.2776	7.17991	11.3587	12.7926	10.6129	8.09276	10.2691	11.3826	13.2589	7.70044	9.61471	8.5157	11.4346	6.82018	17.3192	10.0941	12.5459	13.1929	12.8537	14.9208	10.8194
						TCGA-BLCA	TCGA-2F-A9KW	1	254	white	67	0	2	9.86109	8.64746	9.47573	8.53528	10.7134	13.2046	12.9084	9.56986	10.6055	7.53916	11.4284	11.8451	11.8242	7.50779	9.92926	10.5689	11.3004	11.4909	10.1331	11.4263	12.5656	9.783	8.65105	9.31515	9.9901	7.60733	14.9351	10.0888	12.3606	11.3674	11.4645	11.8541	10.0875
						TCGA-BLCA	TCGA-GV-A3JV	1	434	white	66	1	2	12.0109	8.50779	9.38802	9.56986	12.3009	12.3748	11.973	10.7903	10.8194	3.45943	11.4702	12.4856	12.2122	2	11.1812	9.86109	11.1312	9.7879	10.8757	11.2674	12.8677	8.18488	7.80735	9.25503	11.5299	9.77149	16.5167	9.48985	11.7532	10.7977	14.1126	11.7043	11.3129
						TCGA-BLCA	TCGA-FD-A3SS	1	391	white	66	1	2	10.9643	6.71425	11.1478	7.34873	10.927	12.1608	12.0701	10.5755	11.5362	9.61655	12.0492	13.1677	11.4009	7.07682	11.3864	13.0738	10.5727	8.25739	10.4357	11.9274	13.4915	6.96578	7.63662	9.12153	11.1222	5.58496	16.2963	10.062	12.0334	13.5747	13.7407	9.9901	11.567
						TCGA-BLCA	TCGA-2F-A9KP	1	364	white	66	1	2	11.6439	11.4929	10.1497	7.63662	11.5546	12.2784	11.461	10.1202	10.7482	6.87036	12.4988	12.2357	12.3052	2.32193	10.9751	10.3399	10.2252	7.58496	10.7879	11.3658	13.1978	7.9542	7.16993	8.00562	10.6294	9.47573	15.7103	10.3815	12.3404	12.3608	12.9785	8.99435	10.1724
						TCGA-BLCA	TCGA-E7-A541	1	778	white	66	1	1	11.7985	8.80413	10.8194	6.22882	10.3231	12.2712	11.5137	11.6913	10.9679	9.89785	11.7993	12.0725	11.8952	3	11.3998	10.9307	10.7969	7.50779	11.4383	11.1273	12.6878	7.75489	7.16993	8.14975	11.1674	8.49185	15.6144	9.67596	11.7296	12.8039	12.9103	11.7185	10.825
						TCGA-BLCA	TCGA-4Z-AA7N	1	1367	white	65	1	2	10.4696	8.41785	9.09803	9.62022	10.421	10.8834	10.4051	9.59805	9.31967	6.84549	10.4168	10.1737	10.5603	3.45943	8.60363	10.3696	8.39232	8.08215	9.38586	9.90087	10.769	8.66534	7.60733	8.79442	10.9958	7.84549	14.2674	8.18982	9.97154	9.67243	10.6448	10.3163	8.60363
						TCGA-BLCA	TCGA-GV-A3QG	1	764	white	65	1	2	11.2113	10.3354	11.1007	8.90388	11.464	12.954	13.3998	11.357	10.9549	9.86264	11.9509	12.2923	12.6913	5.61471	10.9922	13.0056	10.6027	10.5546	11.7469	11.2662	13.3622	9.81218	9.7039	9.72451	11.4035	8.02791	16.5857	10.1072	12.36	13.0203	12.9379	13.4602	11.0835
						TCGA-BLCA	TCGA-ZF-AA4T	1	599	white	65	1	2	11.2639	9.68475	9.98584	4.16993	10.5127	10.9121	11.6362	11.3832	11.168	7.03342	11.7936	12.3904	11.207	3	11.128	12.2291	10.7322	6.02237	10.062	11.1273	12.5904	5.97728	5.2854	8.224	11.0042	5.93074	15.2823	9.59619	11.2366	13.0587	13.186	10.5008	9.67066
						TCGA-BLCA	TCGA-XF-A9SK	1	486	white	65	1	2	9.24555	8.93369	9.60918	7.20945	11.5033	13.0942	11.2216	8.64746	11.0389	7.6865	10.8226	11.3026	10.4263	8.16491	10.4767	11.4813	10.1548	7.26679	10.3597	11.7305	10.5216	7.31288	6.72792	8.79116	10.8781	7.58496	15.3546	7.59246	10.6448	9.44501	11.9181	12.512	9.77314
						TCGA-BLCA	TCGA-FD-A43Y	1	474	white	65	1	2	11.9498	9.79116	9.73978	6.40939	9.35315	12.8671	11.6312	10.7398	10.374	8.22882	10.9564	11.4497	12.0904	8.7211	11.0967	12.3875	9.88111	6.18982	9.84549	11.388	12.9039	6.08746	7.47573	7.77479	11.0203	5.04439	16.5099	9.98868	11.4964	10.6653	14.5063	13.5625	10.1662
						TCGA-BLCA	TCGA-FJ-A3ZE	1	324	white	65	1	2	11.1799	7.39232	8.17493	6.06609	10.69	12.7379	11.8349	10.9929	10.2312	10.5603	11.5821	11.8719	13.4648	3.58496	11.2324	11.5741	11.7134	4.90689	11.1485	10.5632	13.0609	6.06609	5.80735	8.21432	11.2544	4.90689	15.8445	10.3095	10.7952	11.7822	13.3055	10.3231	10.9527
						TCGA-BLCA	TCGA-BL-A13J	1	81	white	65	1	2	9.72877	8.16742	9.95565	7.47978	10.545	12.2884	10.5651	9.56033	9.78545	7.7879	12.9386	12.2145	13.6584	1.32193	10.4481	11.7536	9.60084	7.80413	10.3929	11.3759	12.0097	7.62936	9.0954	9.90087	10.3559	7.41363	17.7147	9.41469	11.3401	12.0964	11.9183	11.1969	11.1908
						TCGA-BLCA	TCGA-E5-A4TZ	1	467	white	64	1	2	11.3421	9.47776	11.3298	5.24793	10.9381	12.9278	11.9348	11.0417	10.5382	8.72792	13.0485	13.3115	10.9315	5.67243	11.3848	11.7582	10.0293	8.72451	10.733	12.0802	12.9919	6.45943	5.58496	8.3837	10.9293	4.58496	16.0437	10.1774	13.1072	13.3788	13.887	11.6887	11.73
						TCGA-BLCA	TCGA-XF-A9T8	1	418	white	64	1	2	11.1026	10.4737	10.3987	6.47573	10.8025	12.6405	11.3298	10.4231	10.5622	2.58496	11.2288	12.8624	13.5545	3.58496	12.1721	10.4909	10.7985	8.5157	10.4998	11.1718	12.8353	7.94251	8.05528	8.05528	9.58684	6.10852	16.8654	9.68825	12.4089	13.3036	14.6242	15.1387	11.3805
						TCGA-BLCA	TCGA-XF-AAME	1	2828	white	64	0	1	10.8711	10.3343	11.272	10.8788	11.6078	12.4059	11.7793	10.2946	10.6312	7.62205	11.9535	12.4981	11.1668	4.08746	11.0505	12.1671	10.4294	11.0154	10.7838	10.8305	12.7818	11.0021	9.75489	11.1555	11.1085	9.87344	16.0915	9.74819	11.8967	12.1978	13.0033	13.0047	10.4767
						TCGA-BLCA	TCGA-2F-A9KO	1	734	white	63	1	2	10.4747	9.95128	9.77972	7.54689	10.255	11.3961	11.3603	10.1254	10.2432	1	11.4686	11.819	12.5372	4.32193	10.5831	9.43463	9.06609	6.33985	10.7279	11.1718	11.6533	6.37504	6.47573	9.33985	10.6046	6.80735	15.0125	9.62205	11.1183	11.0286	12.2741	13.0367	10.196
						TCGA-BLCA	TCGA-BT-A20T	1	453	white	63	1	2	9.30606	7.97154	8.44708	6.52356	10.4656	12.2703	11.5454	9.59432	10.23	4.08746	10.8122	11.0674	10.4686	2.32193	9.27845	8.92778	10.0154	5.52356	10.0607	10.6689	11.7711	6.89482	7.64386	8.70044	9.50779	6.82018	15.3167	8.64386	10.2691	10.6564	11.9274	12.9901	9.79442
						TCGA-BLCA	TCGA-FD-A6TH	1	131	white	63	1	2	11.0861	9.11374	11.7748	8.33985	11.4712	13.0163	13.1069	10.0967	11.1592	13.1534	13.0556	13.2547	12.2228	5.2854	11.0505	13.9231	10.8588	9.13955	10.4083	11.9516	13.3945	8.45533	6.87036	8.51175	10.0471	6.47573	17.1924	10.0014	12.3315	13.9612	14.5413	12.2874	11.7142
						TCGA-BLCA	TCGA-XF-A9SX	1	719	white	63	0	2	9.61102	8.32643	8.86728	5.12928	10.7432	11.7773	11.6421	8.97441	10.8471	5.90689	10.7237	11.233	7.9542	2.32193	10.1824	11.0028	10.0954	7.17991	9.85175	11.1935	11.4035	6.67243	6.50779	7.6865	8.91588	6.45943	15.5036	8.49185	11.1085	11.4717	13.2263	12.9533	10.0498
						TCGA-BLCA	TCGA-DK-A2I2	1	237	white	63	0	2	10.7296	10.6996	10.0928	5.08746	12.0492	12.7793	12.1777	10.2058	11.4594	7.25739	12.4062	12.0577	12.5943	3.32193	12.7283	13.4736	11.4783	8.12928	10.4858	10.7707	12.8866	7.45121	8.47168	9.12153	11.8719	6.02237	16.4302	9.76818	11.7381	12.2207	13.7852	13.0582	10.8719
						TCGA-BLCA	TCGA-FD-A3SQ	1	1423	white	62	1	2	10.9151	9.18239	10.4988	9.74483	11.5746	12.4247	12.6273	9.5812	10.6275	4.39232	11.6479	11.4998	10.8305	8.55842	10.3049	11.5632	10.0928	8.54303	10.6129	11.062	12.0885	9.07948	9.27146	11.3359	12.1843	9.43045	16.3156	9.0954	11.163	9.39017	11.736	13.0909	9.35975
						TCGA-BLCA	TCGA-BL-A3JM	1	205	white	62	1	2	11.6702	9.01681	11.6484	9.01402	11.3961	12.9775	12.9919	11.0701	10.9794	10.6284	12.9873	13.6914	13.3161	6.02237	11.3853	12.0238	11.9926	9.16491	11.0231	12.0175	14.8534	8.47168	8.49185	15.0264	11.9651	6.04439	16.7621	11.4656	13.6286	13.4244	13.5475	10.8781	12.0678
						TCGA-BLCA	TCGA-ZF-AA5N	1	168	white	62	0	2	8.8857	8.34873	7.58496	2.80735	10.1434	11.6298	11.236	7.04439	9.40514	8.47978	10.4378	10.255	10.8082	2.58496	8.15482	11.1079	9.34207	3.90689	9.26679	9.65821	11.5147	4.39232	3.58496	4.58496	10.0112	4.85798	15.2616	7.98868	9.90689	10.5382	12.158	10.8757	9.13443
						TCGA-BLCA	TCGA-FD-A5C0	1	550	white	61	1	2	12.0238	10.7993	9.88722	9.70736	11.7108	12.0825	11.2228	10.9972	10.6239	5.39232	12.5524	12.7572	10.0795	4.24793	10.6064	10.2095	9.783	7.19967	10.42	11.5098	13.5768	8.29002	7.03342	9.46352	10.1485	7.94251	15.3291	10.5915	12.5563	12.73	12.8394	10.3597	9.51767
						TCGA-BLCA	TCGA-DK-AA6Q	1	413	white	61	0	2	9.14466	10.1935	10.7185	5.24793	10.2021	12.5634	12.3718	9.1267	11.2958	7.5157	11.2674	12.8384	10.8572	5.72792	11.9363	13.0992	9.64926	4.85798	10.69	10.9901	12.2943	6.53916	5.04439	6.72792	10.96	4.70044	16.525	8.73471	12.4926	11.5812	15.421	12.0175	10.8865
						TCGA-BLCA	TCGA-XF-A8HH	1	57	white	61	0	2	10.5078	8.5812	8.67596	9.14211	11.6027	12.4988	10.4471	9.13955	10.9527	10.137	11.8661	11.4284	12.5875	2.32193	9.86419	9.63662	10.4315	7.82655	10.0265	10.3004	12.0553	7.60733	7.80735	9.3443	10.0444	6.32193	14.8318	9.15482	10.8963	10.6804	12.962	10.7381	9.0634
						TCGA-BLCA	TCGA-FD-A3SL	1	712	white	60	1	2	11.3078	7.89482	9.59805	9.73978	10.3151	12.4229	12.253	10.1098	10.4336	8.66534	10.9908	12.3764	10.1749	4.70044	10.8803	10.9809	9.47168	9.04985	9.79442	11.1472	12.1665	9.40301	9.32643	10.8681	10.1059	7.87036	15.7445	8.87036	11.1059	10.6321	12.7605	11.1636	10.3038
						TCGA-BLCA	TCGA-DK-A1A3	1	665	white	60	1	2	9.40727	6.83289	8.7211	7.33092	10.5137	12.2213	12.8615	9.97871	10.0389	7.31288	11.7989	12.3468	11.5948	2.32193	9.90238	10.7952	9.85175	8.09803	9.83605	11.8122	12.5056	8.10852	7.48382	9.34207	10.3696	7.37504	15.1756	9.27146	11.4351	10.1997	12.8878	11.3089	9.19722
						TCGA-BLCA	TCGA-XF-AAN7	1	565	white	60	1	2	10.9578	6.87036	9.88874	7.20945	10.0701	9.29692	8.94251	8.82655	9.97585	7.56986	10.9359	11.8568	9.60733	1	10.007	9.50581	9.10066	9.85487	9.48382	10.2312	12.0258	7.74819	8.85798	8.78136	11.1176	8.73471	14.8222	9.26679	11.5694	12.1551	12.2703	8.68299	10.2479
						TCGA-BLCA	TCGA-UY-A78K	1	536	white	60	1	2	11.3304	8.54689	10.5382	7.30378	9.92035	12.7524	12.2854	11.8431	11.5892	7.43463	11.4522	12.6653	12.9787	3	10.9758	12.3864	10.6439	8.14466	10.9571	12.6622	12.9862	8.36194	7.2384	8.40939	11.7863	7.42626	15.7599	9.67948	12.3977	12.3682	13.7902	12.2476	10.4378
						TCGA-BLCA	TCGA-CU-A0YN	1	393	white	60	1	2	11.2644	8.50383	11.2027	5.16993	11.8396	11.3734	11.8868	10.0458	10.0848	7.19967	12.3977	13.1108	14.985	1.58496	11.4883	10.2574	10.4252	7.2854	10.0835	11.9293	13.1773	7.79442	8.57743	9.30606	11.3587	6.91886	16.6802	9.98157	13.4932	13.1079	13.5028	11.2192	10.6138
						TCGA-BLCA	TCGA-DK-A3IV	1	294	white	60	1	1	11.8424	7.82655	10.196	6.39232	10.584	11.8815	12.2342	11.6334	10.2796	9.33539	13.2834	12.8402	11.7948	6.04439	11.858	11.5684	10.1948	7.06609	11.5172	12.7686	13.0821	6.85798	6.74147	10.1649	11.719	7.79442	16.6395	10.6546	13.4277	12.0362	13.042	13.4677	10.9993
						TCGA-BLCA	TCGA-FD-A3SJ	1	739	white	59	1	2	12.4984	9.64205	10.3576	10.4336	11.9869	13.2838	12.3256	10.4594	11.7095	6.76818	13.1875	12.6305	13.5729	3.80735	11.1293	12.9835	11.4888	8.67948	11.5788	12.7936	14.9974	9.15735	8.37938	10.6961	11.2312	8.78136	15.7149	11.4336	12.1929	11.9556	14.0226	11.2282	12.6108
						TCGA-BLCA	TCGA-XF-A9SP	1	454	white	59	1	2	10.6165	8.84235	9.64746	10.236	11.5285	11.9436	11.8872	9.10591	11.2192	6.9542	11.3095	11.0607	11.5864	6.33985	9.83289	11.6511	10.2204	9.70908	10.3891	11.713	12.0362	9.73978	8.54303	10.8368	10.6092	8.51175	14.8239	8.60733	10.7566	10.5147	12.5784	11.7207	9.75656
						TCGA-BLCA	TCGA-ZF-A9R9	1	864	white	58	1	2	9.55651	8.13443	6.84549	8.21432	10.1699	12.4126	11.0519	8.65821	10.5127	6.55459	10.0593	10.5118	10.6812	3	9.50779	10.6751	9.77808	7.12928	9.50184	9.59432	11.0735	6.90689	7.57743	9.16491	8.97154	6.35755	13.944	8.09803	10.3298	9.3966	11.3669	9.65105	8.69697
						TCGA-BLCA	TCGA-DK-A3IU	1	706	white	58	1	1	11.1183	9.18488	10.716	10.2503	11.1118	12.6658	12.0812	10.6073	10.6618	11.6667	12.0286	12.4081	11.6389	2	10.4252	13.2578	10.2538	8.62205	10.8502	11.1755	12.7138	9.48583	7.90087	10.1124	11.0485	7.90087	16.5199	9.20212	12.2494	11.7777	13.4588	14.2724	11.1241
						TCGA-BLCA	TCGA-XF-A8HI	1	544	white	57	0	2	10.3663	7.62936	10.0403	6.79442	10.9513	12.2935	12.4821	9.68299	10.6129	7.86419	12.1066	11.5755	12.5507	4	10.9701	11.2167	9.48784	7.47573	10.5718	10.9031	12.2761	8.55075	7.08746	8.76818	10.3185	7.54689	16.7194	9.35755	11.1542	11.2633	12.4128	11.2216	9.86728
						TCGA-BLCA	TCGA-BL-A13I	1	223	white	57	0	2	9.98014	8.90839	9.71939	6.65821	10.9618	11.9003	12.6303	9.63209	9.95201	0.584963	11.729	11.6638	8.23122	10.6225	10.5038	12.4793	9.92333	9.44708	9.03205	10.8242	12.627	8.77149	7.44708	11.5155	9.67066	6.83289	15.8683	8.78136	11.2294	11.5459	14.1736	12.0283	11.0444
						TCGA-BLCA	TCGA-BT-A20X	1	251	white	56	1	2	11.0681	9.23601	10.8603	6.04439	10.7977	13.4524	11.9311	10.941	11.1215	7.82018	12.043	13.3389	13.9096	4.32193	12.2868	11.7846	11.3701	8.64746	11.592	11.8459	13.5947	8.49185	8.48382	10.4727	10.8925	7.03342	16.9803	10.2058	12.9248	13.0326	14.3632	15.6443	11.3163
						TCGA-BLCA	TCGA-XF-A9T2	1	575	white	54	1	2	10.4231	8.26209	8.83289	9.55459	10.1137	11.656	11.6746	9.31515	10.0782	10.7715	11.0721	11.2912	11.6569	5.93074	9.75656	10.4909	9.62022	7.9542	8.98584	10.2276	12.8382	7.63662	8.79442	11.2497	9.19722	6.22882	15.1396	8.9542	10.8681	11.1586	12.2321	8.98584	11.1459
						TCGA-BLCA	TCGA-ZF-A9R3	1	949	white	53	0	1	11.9166	6.44294	10.3387	5.97728	10.7474	13.1426	12.9487	10.3163	11.2107	4.52356	11.7478	11.5967	13.2017	6.45943	10.6582	10.9359	11.7636	5.83289	11.4676	11.4964	12.4737	6.04439	7.11894	7.91886	11.4656	10.0566	16.5611	9.86882	11.6751	12.0748	12.5486	11.7241	9.26209
						TCGA-BLCA	TCGA-G2-A3IE	1	612	white	51	1	1	11.3891	7.24793	9.51767	8.29921	11.1892	11.9951	11.0119	9.38802	11.4299	7.53138	11.3371	11.3304	12.3482	2.32193	10.0014	12.2568	9.57365	6.47573	10.6339	11.388	12.7205	6.96578	5.49185	7.19967	11.0908	7.78136	14.7551	8.98868	10.4136	9.63662	13.5983	9.58684	10.9344
						TCGA-BLCA	TCGA-FJ-A871	1	272	white	49	1	2	9.91289	9.53333	10.0154	7.76818	12.0189	13.2819	13.1562	8.97441	11.3202	5.58496	12.178	12.0573	12.3273	3.58496	11.3117	13.2023	12.0658	6.44294	9.78953	11.8803	13.9179	14.145	5.75489	6.49185	10.2119	5.83289	17.8803	10.363	12.4398	13.7975	13.8492	10.7879	11.6129
						TCGA-BLCA	TCGA-DK-AA6L	1	1163	white	48	1	2	11.3214	8.63662	10.1189	8.32643	11.8118	12.058	10.1874	9.14211	10.7099	9.87344	11.9163	12.2871	11.3129	6.08746	11.1861	11.7099	9.65464	6.80735	9.8933	10.388	12.1624	5.08746	5.32193	7.53138	10.7928	4.24793	16.462	9.2854	11.275	12.1157	12.8293	12.4003	10.7879
						TCGA-BLCA	TCGA-XF-A9T4	1	495	white	48	1	2	11.0286	12.3197	10.3185	4.75489	11.6129	12.6837	12.8767	10.6662	10.9787	8.01123	12.5899	12.3926	13.5525	9.02237	11.3134	13.0166	10.683	7.86419	11.5498	11.9263	13.255	9.54496	7.45121	7.76818	11.1812	9.33092	18.01	9.633	12.9142	13.0851	14.1521	13.4402	9.93958
						TCGA-BLCA	TCGA-FD-A5BV	1	163	white	47	0	2	9.82337	6.88264	8.74819	6.47573	10.6036	12.9984	11.4445	9.65821	10.7944	9.73302	10.8588	11.2662	11.5859	0.01	11.014	11.4589	9.72451	7.43463	10.4838	10.697	13.1749	7.79442	6.72792	9.82018	10.8424	7.42626	14.9796	9.91139	10.5915	10.5962	12.93	8.37938	9.76487
						TCGA-BLCA	TCGA-GC-A3I6	1	630	white	45	1	2	10.7142	11.144	10.2992	4.90689	10.1861	11.978	12.0098	10.3542	10.3298	7.70044	12.0324	12.8439	12.7442	7.83289	12.1734	11.3208	9.75322	6.78136	11.3554	11.0715	12.5589	6.85798	6.90689	8.98014	10.7091	6.12928	16.9952	9.65284	12.8307	13.1159	13.8016	13.6834	10.3707
						TCGA-BLCA	TCGA-KQ-A41Q	0	1429	white	89	1	2	9.9263	12.5672	9.21675	4.52356	11.4979	12.1951	11.9144	10.0634	10.8963	3.58496	11.9694	11.9163	11.0056	3.16993	11.794	9.83763	11.5231	6.49185	10.7591	11.2917	12.9558	5.80735	5.88264	7.25739	11.3032	7.49985	14.8584	9.54303	11.9381	11.5536	12.218	10.0028	10.7912
						TCGA-BLCA	TCGA-XF-A9T6	0	64	white	88	0	2	10.5774	9.783	9.82177	1	10.5831	13.7091	13.1372	9.77149	11.5821	8.45121	12.5179	12.2003	11.0505	8.81378	11.3163	13.0765	11.7385	7.88264	10.8471	12.5772	13.6491	6.59991	5.90689	7.55459	9.49386	4.80735	16.716	10.014	11.3707	12.4362	15.0145	11.7809	12.6407
						TCGA-BLCA	TCGA-KQ-A41S	0	35	white	87	0	2	11.0647	8.82655	10.3597	8.29462	10.6375	11.3977	12.2195	10.4848	9.97154	8.99152	11.9755	12.3465	12.0084	2.58496	10.3696	12.4522	10.7591	9.11894	10.4929	12.1212	12.5142	9.57365	8	8.83605	10.8178	9.08481	15.7279	9.18982	11.7838	11.1033	12.8863	10.4051	9.86882
						TCGA-BLCA	TCGA-UY-A9PE	0	189	white	86	1	2	9.50779	7.47573	8.47978	7.18982	10.3923	12.3818	10.7262	7.71425	10.683	7.40088	11.115	10.4838	10.9403	4.64386	9.91886	11.2674	10.7389	6.33985	9.82814	11.2842	13.1619	6.50779	6.2854	7.13955	10.275	7.16993	14.8563	9.89936	10.2009	10.5058	13.3662	10.0701	10.1849
						TCGA-BLCA	TCGA-GD-A76B	0	224	white	86	0	1	12.2213	8.36194	8.75154	9.11894	11.6087	12.7492	13.1952	9.74147	11.6055	4.39232	11.6375	12.5536	12.3191	3.58496	11.3537	11.4315	11.0532	8.48784	9.7364	11.2952	13.149	7.93074	6.14975	9.0954	10.6439	8.5812	15.608	9.38802	11.4179	10.4868	14.0485	11.8281	10.0701
						TCGA-BLCA	TCGA-DK-A1AE	0	491	white	84	1	2	11.3032	8.84549	11.5206	7.45121	12.1975	13.5754	13.7617	11.1202	11.2621	6.45943	13.6423	14.1106	12.4244	12.9401	11.9359	11.9136	11.4964	7.3837	11.007	11.9961	14.9414	7.71425	10.0334	10.0661	10.7616	7.62205	17.192	11.7448	13.5078	13.0639	15.9397	11.6764	12.5536
						TCGA-BLCA	TCGA-FD-A43X	0	110	white	84	1	1	10.4305	8.67243	9.91886	8.82972	11.3886	13.3113	12.2697	9.15228	11.5328	9.15228	12.2691	11.2264	11.268	2	11.0546	11.6519	11.3225	7.21917	10.6751	11.2052	12.6103	7.69349	6.44294	7.35755	11.0112	9.97871	16.9861	9.29232	10.6935	10.6294	13.353	10.4221	9.42206
						TCGA-BLCA	TCGA-DK-A1AF	0	536	white	84	0	2	11.1874	9.79116	11.4062	8.92778	11.6595	12.7145	12.6087	10.5925	10.7245	6.82018	12.4783	12.3222	13.3658	5.45943	11.115	12.354	10.3912	11.2119	11.3247	11.6667	13.0575	11.0941	10.4147	10.8471	10.3869	10.2336	17.2593	9.71768	12.2366	12.811	13.0676	12.7651	10.5736
						TCGA-BLCA	TCGA-GD-A3OP	0	64	white	84	0	2	12.5519	7.67243	10.7254	10.4858	11.1202	12.2972	12.6937	10.7211	11.0098	7.09803	12.3671	12.1532	12.7515	3.45943	11.5445	11.4564	9.69523	9.49386	10.858	11.3939	13.0062	9.66888	8.34873	10.0389	11.8037	10.352	16.0175	9.98442	11.9651	10.6202	12.7762	10.7254	10.2597
						TCGA-BLCA	TCGA-2F-A9KT	0	3314	white	83	1	1	9.54496	12.3287	9.39874	5.12928	11.7561	11.6883	10.9374	9.56605	10.825	9.66711	11.1911	11.117	12.1787	4	10.2923	11.8591	10.6421	7.49185	10.1573	10.668	11.6027	8.08215	6.83289	7.88874	10.9794	4.58496	15.7072	8.88264	10.6384	11.268	13.3002	12.7723	9.43463
						TCGA-BLCA	TCGA-ZF-A9R4	0	921	white	83	1	1	11.5038	5.78136	9.10591	7.73471	11.446	11.713	12.7004	10.4778	10.585	6.88264	12.681	12.5209	13.1059	2.32193	11.2574	11.4357	9.9629	6.20945	9.98014	11.1855	12.8364	6.10852	4.85798	7.88264	10.5755	8.3443	14.712	10.1573	11.7989	10.5641	13.6653	10.8337	11.576
						TCGA-BLCA	TCGA-GC-A3RD	0	428	white	83	0	2	11.4073	8.55075	10.4157	4.64386	11.1935	12.8216	11.3095	9.86109	11.1573	6.47573	12.7632	12.4218	12.6819	1.58496	10.1911	10.3848	10.3083	6.49185	11.3095	11.8929	12.7684	7.56224	6.75489	8.14466	11.733	6.56986	15.6681	9.93517	11.3945	11.7993	13.0969	11.8045	10.4336
						TCGA-BLCA	TCGA-FD-A6TB	0	572	white	82	1	2	10.8626	10.1267	10.314	10.2958	11.2113	12.4006	12.3592	10.5868	10.8234	6.70044	11.7628	12.0161	10.69	9.12928	9.33762	11.5142	10.4778	10.2923	10.3354	11.2015	12.2177	9.41151	9.16491	9.82972	11.6124	7.98299	15.8421	9.29462	11.9669	11.6618	12.1389	13.0782	10.1459
						TCGA-BLCA	TCGA-DK-A2I6	0	2656	white	81	1	2	10.8471	8.56605	11.697	4.75489	11.6266	14.0266	13.117	10.6671	12.8216	8.66888	13.6996	12.906	14.1889	2.58496	12.2715	13.9009	11.1267	10.3004	11.2137	12.5663	13.578	10.1861	6.59991	8.21917	12.3767	5.61471	16.6297	10.2644	11.7478	14.6336	14.2482	15.5635	12.2909
						TCGA-BLCA	TCGA-ZF-A9R1	0	773	white	81	1	2	10.1774	9.76653	9.68124	9.58496	11.2204	12.7977	12.6883	10.2715	11.1079	7.98868	12.4078	11.7224	11.7977	3.16993	11.2003	10.2842	10.2609	6.62936	10.3619	10.6812	12.9418	8.05528	6.71425	9.15735	10.6466	6.12928	17.3992	9.96867	11.2819	12.67	11.9473	10.7657	9.75489
						TCGA-BLCA	TCGA-UY-A9PD	0	542	white	80	1	2	9.57365	7.57743	8.66534	6.44294	11.1209	12.7791	11.7436	9.58308	11.2627	6.70044	11.5058	11.5618	10.6083	3	9.62936	10.722	9.81378	7.42626	9.35755	10.9144	12.8168	6.75489	6.6865	7.56224	9.01959	6.6865	14.6217	8.9629	10.3554	11.432	12.7766	9.88264	10.128
						TCGA-BLCA	TCGA-GC-A3WC	0	540	white	80	0	2	11.5929	8.08215	11.2378	8.9571	11.5445	11.9708	11.8345	10.3498	10.5333	6.2854	13.3749	12.7688	10.8258	7.32193	10.4315	11.7009	9.44915	8.53916	9.89178	11.1536	13.0441	8.48382	7.70736	8.86728	10.3783	6.74147	16.1625	10.4838	11.7138	12.1315	16.5388	13.7047	11.2952
						TCGA-BLCA	TCGA-KQ-A41R	0	1350	white	80	0	1	9.42206	6.74147	7.25739	5.9542	9.79442	11.4476	10.4858	8.40514	11.4263	3.90689	9.82018	10.7879	12.3052	2.58496	9.26209	9.40088	10.8439	7.75489	9.88722	9.95565	11.3565	7.93664	6.14975	8.11894	10.0526	8.51175	13.4098	8.01123	9.20701	9.67066	12.9956	8.84235	9.44915
						TCGA-BLCA	TCGA-DK-A2I4	0	4343	white	79	1	2	11.2222	11.4757	11.3174	8.12412	11.5594	11.9513	12.3166	10.9403	10.9908	9.19229	12.7601	12.7948	12.5615	9.08215	11.6344	11.875	10.7022	9.37504	11.4645	12.3939	13.083	8.633	9.07146	9.69349	11.4025	6.53916	16.7434	10.2444	12.8832	13.2302	13.8915	14.6358	10.2877
						TCGA-BLCA	TCGA-FD-A3SN	0	887	white	79	1	2	10.242	11.9812	10.3641	6.42626	12.0269	13.5744	11.5294	10.137	11.183	8.49185	12.5316	12.0345	12.3715	8.57365	10.4747	12.2411	9.73809	10.2773	10.6165	11.6671	13.3086	7.27612	7.26679	8.64386	11.4268	5.9542	15.989	10.5469	11.5073	12.3278	14.2575	12.2726	10.5372
						TCGA-BLCA	TCGA-GC-A3OO	0	481	white	79	1	1	12.4126	7.10852	9.14466	11.3918	9.98584	11.9676	11.825	9.32867	10.0795	8.89482	12.1793	12.6757	11.6878	5.45943	11.0334	11.9516	9.62936	9.49386	10.0098	11.5897	12.0778	9.01123	8.59619	9.73471	10.9151	8.16993	16.9798	8.83289	12.795	11.4702	12.9933	10.1972	10.4051
						TCGA-BLCA	TCGA-FD-A6TC	0	187	white	79	0	2	10.3576	7.82655	9.25739	7.08746	11.4998	13.1092	11.0196	9.84078	10.8041	8.35315	12.0604	12.7277	10.5736	6.33985	10.7202	11.7035	9.70908	8.04439	9.58684	11.218	12.6564	7.65105	7.49985	8.62936	11.9755	7.53138	16.5	10.1111	12.0464	12.4406	13.0177	11.3526	9.92778
						TCGA-BLCA	TCGA-XF-AAMY	0	3011	white	78	1	2	10.8376	7.70044	9.16993	8.77479	10.8688	11.8734	11.6069	8.91289	10.0835	11.0775	11.0348	11.2929	11.2076	2.80735	8.19967	10.7372	9.17493	8.02237	9.45533	9.84706	11.0362	7.57743	7.91289	8.25267	9.86882	7.36632	14.8123	8.0607	10.7237	9.69349	12.2986	10.4888	9.15482
						TCGA-BLCA	TCGA-LC-A66R	0	466	white	78	1	2	9.75489	7.67243	9.80735	5.04439	9.72962	11.1743	10.9462	10.4429	9.39232	6.75489	12.0904	12.1904	11.544	7.76818	10.4409	10.8711	9.67772	7.99435	10.2621	12.8362	12.5807	7.33092	7.64386	9.25739	10.6582	6.61471	14.8807	8.92778	12.7286	12.1299	12.8514	11.9741	10.4179
						TCGA-BLCA	TCGA-XF-A9T5	0	2027	white	78	0	2	10.3432	9.97871	11.3021	5.2854	10.8234	12.4268	12.7054	9.22882	11.0492	7.13955	11.6662	12.272	12.1163	3	11.825	12.0461	9.56415	7.54689	10.9218	11.0451	12.6163	7.02237	6.24793	7.07682	9.58684	5.61471	16.0588	9.01959	11.2216	13.5614	14.2962	13.666	10.9114
						TCGA-BLCA	TCGA-DK-A3X1	0	2009	white	78	0	2	10.5641	9.05799	8.56605	4.16993	10.8001	13.2564	12.2402	9.46557	11.0505	6.80735	11.6551	11.6334	12.451	2.32193	12.0338	11.6974	10.7524	7.22882	11.3089	12.1335	13.6217	7.18982	7.72792	9.37504	10.0634	7.93074	15.2257	10.2467	10.9535	11.8122	14.0765	10.6768	11.2906
						TCGA-BLCA	TCGA-PQ-A6FN	0	507	white	78	0	2	10.4798	10.9744	9.33092	6.37504	11.2015	13.8747	11.6165	9.33985	10.7985	7.40088	12.7145	12.4022	10.7364	4.90689	11.8142	13.3626	11.5512	8.10329	10.1472	11.6434	12.9551	7.73471	6.39232	7.63662	10.5088	5.52356	16.0302	10.0417	12.719	12.5033	14.0472	12.9231	11.3236
						TCGA-BLCA	TCGA-UY-A78P	0	2380	white	78	0	1	11.279	9.51964	9.17493	8.74147	10.8289	12.5355	12.4484	10.1774	11.1984	6.04439	12.1163	11.6869	12.5026	5.78136	10.851	10.7936	10.8114	8.45533	11.3247	11.6243	13.163	8.21432	7.11894	8.58496	10.0512	7.16993	16.5445	9.90388	11.9458	11.9121	14.3387	14.6668	10.3061
						TCGA-BLCA	TCGA-YC-A89H	0	573	white	78	0	1	10.1984	9.44087	9.23122	3.90689	10.9151	12.768	12.791	9.92333	10.4594	10.0458	11.9755	11.7595	13.5687	1	11.4929	11.3869	10.7237	6.45943	9.90539	11.1643	12.909	6.06609	5.12928	8.82655	10.813	9.44708	16.721	9.01681	12.1787	12.3306	14.4663	12.7013	10.8781
						TCGA-BLCA	TCGA-XF-A8HD	0	2964	white	77	1	2	10.2467	11.1497	10.1421	4.75489	11.2204	12.7748	13.0218	10.7134	11.6013	10.3794	12.3415	12.8813	13.0652	6.20945	11.3038	11.5093	10.6027	7.90087	11.7241	11.1383	12.6136	7.53916	6.89482	8.62571	10.8978	8.77808	16.5078	9.70044	12.4808	13.5453	14.5885	14.8429	10.0014
						TCGA-BLCA	TCGA-ZF-A9RC	0	2868	white	77	1	2	9.13186	10.0362	8.85175	9.04439	11.9076	10.9218	11.8309	8.76818	10.9241	8.76487	11.412	11.1592	11.8265	1.58496	9.75822	12.2966	11.2076	7.69349	10.2119	11.0056	11.3393	7.52356	7.56986	8.65464	10.6384	8.36194	15.638	8.47168	10.1267	10.7582	13.1897	10.9469	11.0934
						TCGA-BLCA	TCGA-G2-AA3F	0	893	white	77	1	2	10.4471	7.24793	10.0901	5.9542	11.4793	12.7332	12.8293	10.1836	11.0154	6.32193	11.8281	11.9388	12.9607	3.90689	9.62205	11.1466	10.1972	6.82018	10.7748	11.7009	13.3935	6.26679	7.03342	7.81378	10.7457	7.06609	15.3365	10.3998	11.272	11.7834	12.4813	9.79766	11.0189
						TCGA-BLCA	TCGA-K4-A83P	0	495	white	77	1	2	11.0587	10.2143	10.0042	11.0748	11.3382	12.2476	11.5479	10.5925	11.0921	7.84549	11.5445	11.5603	13.1954	4.64386	10.2935	12.0908	9.88111	9.18488	10.3663	11.3945	11.2877	9.65464	8.41363	9.91588	11.3701	8.99152	15.0845	8.633	11.4788	10.8742	12.9157	12.5553	9.7039
						TCGA-BLCA	TCGA-UY-A9PF	0	117	white	77	1	2	11.8301	5.80735	7.40088	6.52356	10.5708	10.6874	11.4378	9.05799	9.75656	5.58496	11.4078	10.9396	11.2935	1.58496	9.05528	11.0888	8.84862	6.91886	9.92333	10.0901	11.255	7.26679	6.44294	7.44294	8.41363	7.52356	14.3777	8.16993	9.76321	8.69	12.3185	9.05799	8.61839
						TCGA-BLCA	TCGA-GV-A40G	0	580	white	77	1	1	12.1085	12.1981	9.93811	6.44294	11.3242	13.2647	11.8723	11.0519	11.5122	10.0566	12.2128	13.2738	10.7474	4.24793	12.6359	10.0444	11.8994	10.1189	11.0203	11.4089	13.3703	9.29921	7.82018	9.47978	10.9816	8.13443	16.3012	10.611	11.8607	12.5751	13.6125	9.81538	10.4252
						TCGA-BLCA	TCGA-K4-A3WV	0	646	white	77	0	1	10.7022	10.2889	10.4615	6.10852	11.4686	12.0081	11.3437	10.8994	11.4445	8.15482	11.4651	12.5637	14.6136	4.45943	10.2444	11.3004	10.6064	5.67243	10.9403	11.0389	13.0868	7.29462	5.72792	9.47776	13.0124	5.9542	16.5181	10.1059	11.2946	11.69	12.556	12.2125	9.8392
						TCGA-BLCA	TCGA-XF-AAN3	0	2625	white	76	1	2	11.3066	10.4062	11.1111	8.60363	12.5132	13.311	13.3297	10.3174	11.8603	9.67066	13.1025	13.6677	14.2589	12.0454	12.5701	13.2855	11.411	7.59991	11.3281	12.4057	13.5445	8.27146	8.94837	9.01402	11.96	9.08481	18.6543	10.6348	12.7275	11.4522	16.8617	13.1737	11.4924
						TCGA-BLCA	TCGA-KQ-A41P	0	1094	white	76	1	2	10.5613	9.84392	9.14466	7.77479	10.8329	12.3537	11.6221	8.80735	11.2192	8.15482	11.4676	11.3587	11.4858	3	10.8502	11.8997	10.5058	8.62936	10.1319	10.8486	11.87	8.19476	7.7211	8.40088	10.7465	10.4543	15.6261	8.8392	11.115	10.6537	13.8353	11.7916	10.3542
						TCGA-BLCA	TCGA-XF-A9SM	0	1048	white	76	1	2	10.3945	10.744	9.42417	4.24793	11.1911	12.4136	11.294	10.2264	10.4878	8.23362	12.6893	12.3652	11.3376	4.16993	11.5911	11.8364	10.4429	8.05528	10.6175	11.4157	12.9346	7.85175	7.09803	8.78136	10.9866	5.75489	16.4906	9.7039	12.4981	12.4019	13.3144	14.0666	10.014
						TCGA-BLCA	TCGA-FJ-A3Z7	0	945	white	76	1	2	9.89178	10.4221	9.76818	8.20457	11.062	11.1599	10.633	8.80735	10.7134	4.80735	10.0196	10.7936	12.1392	2.32193	9.04712	9.81378	11.5741	10.3432	11.1605	10.1573	11.567	10.9744	9.04985	9.41996	10.3869	7.47573	13.3112	8.67596	9.12153	9.16742	12.4828	10.0279	10.7499
						TCGA-BLCA	TCGA-BT-A3PJ	0	789	white	76	1	2	11.1098	8.69	11.9285	3.32193	11.3168	13.2647	12.7311	10.7764	11.1855	1	12.84	13.258	12.7932	8.27146	11.9794	12.7209	10.2204	7.45121	10.9687	12.1105	13.4277	7.49985	7.45943	10.0661	12.3473	6.06609	17.9341	10.5906	12.9778	13.4573	13.8257	14.1449	12.8396
						TCGA-BLCA	TCGA-FD-A43N	0	699	white	76	1	2	11.2485	9.31741	9.61287	6.04439	11.7582	12.1431	12.3424	9.80735	10.93	6.74147	11.7147	11.3842	13.4095	4.08746	9.98014	12.5854	10.4126	8.85487	10.9894	12.4242	12.3961	8.33092	8.09276	8.77479	11.1053	7.49185	15.7813	9.10852	11.4635	11.5191	13.0423	11.989	10.2992
						TCGA-BLCA	TCGA-FT-A61P	0	337	white	76	1	2	10.3542	10.7632	11.2831	9.91139	10.3794	11.849	11.8443	10.374	10.697	8.73132	12.2098	12.3306	12.749	8.31741	11.3095	12.3953	10.0993	8.56224	10.599	12.0944	12.9766	8.79442	7.26679	9.30834	9.18982	6.80735	16.8175	10.102	12.0835	12.3239	12.5507	13.0858	10.9099
						TCGA-BLCA	TCGA-ZF-A9R7	0	665	white	76	0	1	10.341	8.56224	8.01681	5.12928	10.3365	12.51	11.31	8.57365	10.3095	5.90689	9.9571	10.5118	10.3072	5.04439	10.0126	10.3399	9.53916	5.90689	10.1636	10.403	10.6018	7.04439	4.39232	7.27612	10.7398	6.52356	14.9321	7.83289	8.91886	9.82177	11.2276	13.7365	9.89936
						TCGA-BLCA	TCGA-DK-AA74	0	1708	white	75	1	2	8.52748	9.31061	8	7.35755	10.5555	12.2222	11.5765	8.28077	10.0928	4.80735	10.3587	10.7482	10.0056	2.32193	10.2912	11.7147	10.3772	8.70736	9.54689	11.403	11.286	7.56986	7.10852	7.12928	8.97728	5.85798	15.6268	8.03892	10.4083	10.8642	12.8603	14.1053	9.19967
						TCGA-BLCA	TCGA-CU-A3KJ	0	562	white	75	1	2	11.9307	9.48985	11.7292	5.58496	11.6275	13.0166	12.1529	11.6773	10.9887	10.2119	13.229	14.075	14.7506	1.58496	12.5003	12.7377	10.4357	6.9542	10.8811	12.1264	14.1148	6.52356	8.0607	10.0647	10.1447	4.39232	16.509	10.8978	13.181	13.5028	13.5757	14.8426	11.2866
						TCGA-BLCA	TCGA-MV-A51V	0	410	white	75	1	2	10.8408	7.93664	10.2192	9.36851	9.74819	12.224	11.0895	9.6865	10.4179	7.29462	10.9381	11.2963	12.452	6.58496	10.5999	10.6411	9.70217	8.70044	10.4179	10.783	11.3465	8.46761	7.53138	7.85175	11.0861	7.50779	14.2461	8.49586	11.1131	11.0614	12.8291	9.56415	10.4263
						TCGA-BLCA	TCGA-ZF-A9R2	0	642	white	75	1	1	11.0112	9.07948	9.26444	4.70044	10.9484	12.1016	11.3476	10.0526	10.6519	7.56224	11.8329	12.2738	12.3742	2.32193	10.1812	10.9851	10.1137	5.9542	9.99152	11.0782	12.7871	5.49185	4.08746	8.29921	10.5784	7.13955	17.0998	9.93221	11.2021	11.8963	12.7149	9.35755	9.79766
						TCGA-BLCA	TCGA-K4-A5RJ	0	539	white	75	1	1	12.8531	9.98726	11.0721	13.1015	10.1408	11.8082	11.4605	10.4378	10.102	2	11.8642	12.4704	13.2405	2.32193	10.9801	12.2405	10.1319	8.31288	9.80252	12.3639	12.4793	7.36632	10.1737	6.93074	10.0661	6.49185	15.2457	9.38586	12.4432	12.371	13.5348	13.4624	10.7465
						TCGA-BLCA	TCGA-K4-A6FZ	0	55	white	75	0	2	11.7515	9.21432	10.4105	8.51964	11.2883	12.2213	12.3691	9.81538	11.0084	6.97728	12.8126	12.4722	14.7332	7.53916	11.4778	12.2453	10.3095	7.8009	11.8025	11.7628	14.8012	8.42206	6.88264	8.69349	12.3086	8.92184	17.5862	12.0818	12.3912	12.7134	14.1121	14.0163	10.4594
						TCGA-BLCA	TCGA-G2-AA3B	0	2008	white	75	0	1	11.4041	6.12928	9.0634	11.3794	11.664	13.78	12.2758	9.77972	11.9407	7.72792	12.0651	12.3939	12.183	3.70044	11.4346	12.6454	11.5831	6.55459	11.3669	11.6384	13.8469	5.08746	5.67243	7.96	13.3294	9.20701	15.4308	10.0028	11.7801	11.9377	14.3792	12.1328	10.8865
						TCGA-BLCA	TCGA-BT-A42E	0	1108	white	74	1	2	10.2252	10.4929	9.55651	4.45943	11.1183	13.8413	11.8514	10.2969	10.9432	9.78953	11.8178	12.6773	12.3985	4.75489	12.5218	12.8529	11.268	6.32193	11.9432	11.9622	13.6385	7.20945	6.84549	7.41785	12.0417	5.64386	15.7172	10.5953	11.9322	13.389	14.7147	13.9313	10.8834
						TCGA-BLCA	TCGA-GU-AATP	0	1003	white	74	1	2	8.47168	8.47573	8.50383	4.24793	9.95855	12.2837	11.9241	8.36632	11.3498	7.74819	10.0688	10.5981	11.2935	4.9542	9.27612	10.5147	10.0661	7.69349	11.0189	11.151	11.2814	6.80735	7.54689	8.224	10.3004	5.67243	15.7042	7.67948	10.0782	10.4378	12.3534	12.4699	9.24793
						TCGA-BLCA	TCGA-ZF-A9RF	0	1949	white	74	1	1	11.0928	9.59432	12.1232	3.80735	11.0154	12.1036	12.6089	10.1997	10.6375	3.58496	12.3115	13.0957	11.4584	5.75489	12.1768	11.6013	10.2912	13.4073	10.6777	12.0185	14.4632	6.06609	4.45943	8.44294	9.57743	6.53916	16.95	10.8948	12.3864	11.6926	13.6114	12.2369	11.8234
						TCGA-BLCA	TCGA-GV-A3JW	0	649	white	74	1	1	12.2834	6.26679	10.021	7.39232	11.87	13.7201	12.3498	11.0721	10.9174	5.75489	13.1887	12.4891	11.8568	3.70044	11.0674	10.7065	10.1984	7.49185	12.2764	11.8925	13.7115	8.33092	7.21917	8.67948	11.2952	9.26209	15.9099	10.3542	12.2131	12.4911	14.1011	8.70736	12.7551
						TCGA-BLCA	TCGA-UY-A78O	0	2312	white	74	0	1	10.8681	6.55459	8.10329	6.24793	10.5216	12.7217	12.6631	9.47776	11.2946	6.30378	11.3225	11.1824	10.8431	2	11.6362	10.6698	10.6073	8.3966	10.4157	10.9054	12.7989	6.42626	6.85798	8.11374	10.2958	9.13443	15.0131	9.08215	11.412	10.7707	12.6782	10.6812	8.9629
						TCGA-BLCA	TCGA-FJ-A3ZF	0	524	white	73	1	2	11.0437	9.77149	10.6156	5.88264	11.1867	13.0975	12.392	10.6083	12.1592	7.74819	12.0921	11.8887	13.6049	4.45943	11.0279	13.5677	11.0954	7.96578	11.5751	12.1105	13.3146	7.79442	6.84549	8.69697	11.9069	8.65821	14.9031	9.98157	11.9701	12.9377	14.1382	7.50779	12.0461
						TCGA-BLCA	TCGA-E7-A7DU	0	28	white	73	1	2	8.72792	6.18982	8.20457	5	10.5333	12.5911	11.0028	7.59246	10.5498	5.67243	10.7599	10.4686	11.7989	3.80735	9.79604	10.3815	10.352	6.20945	10.2167	10.4553	11.9947	6.24793	5.9542	6.53916	8.87036	7.27612	16.0476	7.89482	9.69697	10.3117	12.2897	9.29462	8.76487
						TCGA-BLCA	TCGA-BL-A0C8	0	1219	white	73	1	1	11.4192	8.39232	9.51373	12.1833	9.57175	11.9311	11.0505	9.8986	9.73132	6.34873	11.2633	11.5125	11.1456	6.76818	8.87805	11.0471	10.4681	9.58496	9.94031	10.3929	11.3081	8.77314	9.30378	9.47066	10.9719	8.35094	14.4362	8.99859	10.5512	11.4126	12.5073	10.9289	8.85175
						TCGA-BLCA	TCGA-DK-A2I1	0	546	white	73	0	1	11.0369	8.16993	9.07682	7.81378	10.6475	14.2006	11.9524	9.01123	11.6724	7.53138	11.749	12.3041	12.4909	3.80735	10.4157	11.5285	11.2052	8.93664	10.668	11.9887	12.1787	7.77479	8.28077	9.17742	9.82655	7.30378	15.4146	8.47978	11.3225	11.7457	14.975	11.9377	10.6266
						TCGA-BLCA	TCGA-DK-A1AC	0	3981	white	72	1	2	12.9484	9.72622	9.16993	4.90689	10.6865	12.4805	12.5406	11.2574	11.5152	4.80735	12.5725	12.7879	13.4551	6.84549	10.5765	11.4157	10.84	6.22882	11.0369	11.7557	13.5844	5.93074	7.05528	9.56605	12.0447	5.52356	16.1989	10.445	13.1411	12.654	14.0908	11.2744	10.4594
						TCGA-BLCA	TCGA-GU-A763	0	997	white	72	1	2	10.3083	9.13443	9.38154	5.20945	11.5216	14.2812	13.1596	8.67596	11.8094	3.16993	12.0179	12.0451	11.9318	3.16993	11.6175	11.8082	11.9129	5.49185	10.6742	11.9823	13.3938	6.35755	3	6.98868	11.617	10.9715	16.8672	9.13443	11.5132	11.1408	13.9858	9.86419	10.9366
						TCGA-BLCA	TCGA-UY-A9PH	0	1561	white	72	1	1	8.93664	9.12412	7.75489	8.73471	10.2479	12.4176	11.1209	8.87036	10.4512	6.82018	10.9106	12.0262	10.9665	5.08746	10.0348	10.3072	9.95128	7.29462	10.4767	10.3674	11.7826	7.18982	6.04439	6.52356	9.26209	6.44294	15.5191	8.29462	10.2264	10.8065	12.7037	12.0007	11.2963
						TCGA-BLCA	TCGA-E7-A519	0	508	white	72	1	1	6.26679	7.80735	6.72792	6.53916	10.2444	13.2056	11.7339	5.49185	10.5314	8.00562	9.50581	9	10.2958	2.32193	8.37938	11.1261	10.6883	6.85798	9.09011	9.33985	9.21432	6.35755	5.42626	5.52356	7.6865	5.88264	16.2041	4.80735	9.39017	9.83131	12.1652	12.0658	8.08746
						TCGA-BLCA	TCGA-DK-AA6P	0	457	white	72	0	1	11.7511	7.72792	9.30378	6.74147	11.0112	11.412	10.9031	9.90539	10.5555	6.53916	12.1929	11.0715	13.3368	2	10.8009	10.5362	10.0444	6.30378	11.0098	11.4762	12.82	7.15987	6.24793	9.08215	11.8734	12.1254	14.914	9.97011	10.6248	10.2467	12.7463	8.64746	11.3685
						TCGA-BLCA	TCGA-GC-A4ZW	0	15	white	71	1	2	11.8956	9.50581	9.65105	4.24793	11.0947	12.7007	10.5641	11.4491	10.5459	6.59991	12.3264	12.3875	11.5073	5.78136	14.7106	10.1357	9.75989	7.75489	9.82972	11.2825	13.0163	6.20945	4.90689	8.36632	11.1261	6.85798	16.3181	9.64386	12.6757	12.5179	12.4638	13.2988	11.0835
						TCGA-BLCA	TCGA-DK-AA71	0	415	white	71	1	1	10.1849	9.25974	8.04985	4.9542	9.74987	11.9578	11.3354	9.24317	10.5206	6.16993	10.8017	11.5684	11.8738	7.81378	10.9425	10.6644	11.2414	6.59991	10.3309	10.9315	11.9274	6.22882	6.62936	7.21917	10.4898	5.58496	16.0665	8.93369	11.8118	10.7698	13.9683	10.375	9.93517
						TCGA-BLCA	TCGA-YC-A8S6	0	293	white	71	1	1	10.1724	9.10066	10.0701	8.94544	10.8138	11.5976	10.5746	9.0634	9.93369	8.25739	10.8541	11.1649	10.0566	4.45943	9.85643	11.0808	9.59991	10.332	9.57175	10.3498	11.5627	10.2527	9.18239	9.70736	9.98726	8.24317	15.5199	8.47978	10.5216	10.4346	13.1858	11.3404	10.1824
						TCGA-BLCA	TCGA-FD-A43S	0	455	white	71	0	2	10.5821	9.74651	8.43879	11.3004	11.0077	13.3531	12.0423	8.88264	11.1124	6.22882	11.0224	10.7457	11.5608	4.85798	10.1306	12.1799	10.0056	10.2656	9.93517	10.7549	11.3454	10.255	7.62936	8.67243	10.5058	9.50184	16.3693	8.14975	10.5661	9.89482	13.3991	12.7237	9.91139
						TCGA-BLCA	TCGA-FD-A43U	0	636	white	70	1	2	9.21917	9.83447	8.61471	6.33985	11.3987	12.688	11.9922	9.03892	11.1176	6.62936	11.0471	11.3376	11.1655	2.32193	10.5118	12.7324	10.9136	8.85175	10.2726	11.041	11.865	8.91588	7.91886	7.65105	9.25974	6.82018	15.6786	8.82337	10.6348	10.6502	13.0728	12.8349	10.352
						TCGA-BLCA	TCGA-DK-A6B2	0	477	white	70	1	2	10.1911	9.21189	9.91588	11.2076	10.9166	12.6362	12.4065	9.74315	11.2276	7.94837	12.4507	12.7089	13.0023	5.58496	10.314	11.6913	9.22641	9.07146	10.6944	11.2842	11.6627	8.29002	8.18982	8.99152	11.3761	7.69349	15.1101	9.00282	11.9538	11.567	13.0987	12.3044	10.0334
						TCGA-BLCA	TCGA-R3-A69X	0	433	white	70	1	2	12.0848	8.94544	11.2609	10.3061	11.4553	12.9269	12.919	10.0782	10.3696	9.07146	12.5885	12.4497	12.2306	7.96	10.8788	12.4674	9.73471	9.22641	11.0607	11.7461	12.4745	11.1092	9.17991	10.0458	11.1611	8.5812	16.5827	9.633	12.0495	11.8226	12.2641	13.0189	9.73471
						TCGA-BLCA	TCGA-ZF-A9RM	0	1455	white	70	1	1	11.5406	6.2854	10.9944	5.9542	10.9665	12.6087	12.4602	10.7322	10.7649	8.86419	13.2084	12.8049	12.6799	3.16993	10.9344	11.9858	9.56605	6.16993	11.168	11.4988	13.8483	6	4.64386	8.07146	10.4919	9.62936	15.6678	10.8588	12.0841	11.8734	13.666	8.15482	11.6944
						TCGA-BLCA	TCGA-PQ-A6FI	0	372	white	70	1	1	10.1472	12.6486	11.4569	5.32193	10.891	12.4717	13.0612	10.5314	11.2912	9.94837	13.3295	13.2447	12.3894	2.32193	11.9125	13.9118	11.6175	6.39232	11.1966	11.7574	13.6174	7.71425	6.65821	8.5157	11.0182	4.58496	17.8379	10.5314	12.8601	14.6729	14.3048	15.3537	12.1357
						TCGA-BLCA	TCGA-DK-A1AD	0	3420	white	69	1	2	11.8887	7.32193	9.40939	9.03342	12.0049	12.5331	11.5651	10.255	11.0423	2.80735	13.1494	12.4868	11.2125	3.70044	11.403	11.3864	11.3276	7.30378	11.0987	12.662	13.6977	7.96	7.61471	9.94691	10.9542	11.0224	15.1416	10.7682	12.0035	10.9564	13.1273	11.0423	9.98726
						TCGA-BLCA	TCGA-2F-A9KQ	0	2886	white	69	1	2	11.825	8.47168	9.82337	4.85798	11.0668	12.4709	10.7406	9.8392	10.6724	7.24793	12.1649	11.8471	13.1223	5.12928	10.4346	9.29462	9.9542	7.02237	10.5746	10.9629	12.5297	6.94251	8.55842	8.5157	11.7453	9.32867	16.9612	9.31967	12.0553	11.0782	12.8682	8.64386	9.22159
						TCGA-BLCA	TCGA-K4-A5RH	0	276	white	69	1	2	11.6786	10.2923	10.9887	8.94544	12.169	12.4001	12.1261	11.6004	11.6004	1.58496	12.5372	13.3105	11.2609	4.75489	12.7944	12.6804	10.8186	10.1737	11.1293	12.4049	13.4785	8.85175	7.89482	9.16993	11.8057	8.19476	16.8675	10.3805	13.3464	13.4387	14.779	14.4448	12.927
						TCGA-BLCA	TCGA-XF-A9T3	0	68	white	69	0	2	9.09276	8.26679	9.27845	8.67948	10.0251	11.7245	10.7271	8.62205	9.49386	8.43045	10.8849	10.9211	10.2808	9.73302	9.45121	11.1267	9.83763	8.44294	10.2467	10.1344	11.9352	8.33539	7.16993	8.88264	9.03617	6.65821	15.4124	8.60363	10.7108	11.0133	12.1895	11.6817	9.36632
						TCGA-BLCA	TCGA-ZF-AA51	0	1714	white	69	0	1	10.2467	9.12412	9.05799	5	11.5122	11.6702	11.3134	9.6987	10.5962	8.3837	11.3778	11.2627	11.9163	3.32193	10.1984	10.545	9.99435	7.02237	9.57365	10.9498	12.1737	6.64386	6.74147	8.76155	10.6147	5.88264	14.9482	9.16993	10.1124	12.0495	12.6364	11.1261	9.99152
						TCGA-BLCA	TCGA-LT-A8JT	0	641	white	69	0	1	11.3061	6.83289	9.74147	6.42626	11.3326	12.9302	12.5196	10.2107	11.1124	7.40088	12.0891	11.6865	12.8333	3.32193	11.242	11.1536	10.1935	6.37504	10.5718	11.1674	12.9771	7.12928	6.04439	7.6865	11.1447	11.3415	16.0736	9.66711	10.4273	10.444	12.2503	10.4325	10.8281
						TCGA-BLCA	TCGA-DK-AA6R	0	5041	white	68	1	2	9.2384	10.5167	10.5953	5.24793	10.2726	11.3641	11.7232	11.2958	10.5196	7.62936	12.0577	13.2531	13.4054	2.32193	12.2784	12.5491	10.7748	6.50779	11.2877	11.1215	13.3859	6.37504	7.54689	8.64386	11.032	6.16993	16.1499	10.3264	12.4173	13.1222	14.0283	14.0627	10.7524
						TCGA-BLCA	TCGA-FD-A5BS	0	1639	white	68	1	2	9.53916	9.69523	8.29921	7.74147	10.8727	11.3487	11.388	8.67243	10.1293	4.32193	10.1935	10.3641	10.2396	8.89785	10.0348	11.3696	9.2854	8.62205	10.0728	11.7855	10.9447	6.93074	6.80735	8.02237	9.84078	5.49185	15.0931	8.27612	9.90989	10.2095	12.1079	13.5659	9.7211
						TCGA-BLCA	TCGA-XF-A9T0	0	799	white	68	1	2	9.633	7.88874	9.89178	6.44294	11.5053	12.4843	11.3197	9.61102	11.1215	4.58496	11.8696	11.3202	12.3791	1	10.4605	11.7351	10.4574	7.2384	10.7432	11.4429	13.3127	6.83289	7.10852	7.61471	9.65821	5.2854	15.3271	9.87344	11.7258	10.6175	13.2537	11.1	9.85487
						TCGA-BLCA	TCGA-DK-A3IS	0	1529	white	68	1	1	11.3608	8.43463	9.77479	5.49185	11.279	13.9788	12.6671	10.8826	11.4512	7.11894	12.462	12.7705	12.1749	4.64386	11.8293	11.1749	11.5008	7.79442	11.3236	11.592	13.8855	7.99435	6.78136	9.22641	10.4998	7.72792	17.6489	10.2444	12.6766	13.058	13.946	12.0109	11.6729
						TCGA-BLCA	TCGA-CU-A3YL	0	906	white	67	1	2	10.0238	8.33092	9.34651	7.79442	12.0768	12.6416	10.792	9.48583	10.7773	4.80735	11.245	11.1643	11.69	3.90689	10.4838	9.73978	10.4325	8.73471	9.92035	10.9218	11.5333	8.77479	7.90087	9.02514	10.1215	8.65105	15.8991	8.89178	10.102	9.97298	13	10.4512	9.80896
						TCGA-BLCA	TCGA-DK-A6B1	0	2049	white	67	1	1	11.989	8.37938	10.2992	6.76818	10.42	12.4286	11.8914	11.5201	11.5063	3	12.098	12.3143	11.9281	3.58496	11.9965	9.77808	10.599	9.50184	11.2609	11.8502	13.3562	9.43254	7.65821	9.0607	10.749	7.82018	15.4222	9.83605	12.7586	11.8258	13.6359	8.90388	9.94398
						TCGA-BLCA	TCGA-DK-A3WY	0	4967	white	67	0	2	11.6133	11.3674	10.4419	9.77972	11.0587	12.6511	12.3315	12.5579	11.1098	5.2854	12.4081	12.5248	10.3509	4.45943	11.0519	12.1765	10.3443	9.75322	10.8361	11.2027	12.7545	9.49985	8.14975	9.25503	12.272	8.25267	15.9059	9.45327	12.6662	13.3264	12.4471	12.9285	10.4231
						TCGA-BLCA	TCGA-DK-A1A7	0	560	white	67	0	2	10.9542	8.32193	8.08746	7.50779	10.5971	12.7634	11.9207	10.6175	11.1793	8.3837	11.2533	11.3767	12.2216	0.01	10.9614	11.0007	11.4367	7.6865	10.0028	11.1235	12.6915	8.49185	6.90689	8.42626	10.8849	7.78136	14.2539	9.0954	10.4073	10.5187	14.4067	9.21917	10.7004
						TCGA-BLCA	TCGA-ZF-AA4V	0	1806	white	66	1	2	7.07682	10.0861	10.0808	5.97728	10.3718	12.7736	12.4091	10.0403	11.3066	8.7211	12.3115	13.0241	13.6319	4.24793	12.3253	12.4871	12.0447	8.87036	10.8719	12.7676	13.4315	7.82655	6.16993	8.33092	10.3129	6.16993	16.7761	10.1923	12.1523	13.0377	15.086	13.0107	10.9965
						TCGA-BLCA	TCGA-SY-A9G5	0	1186	white	66	1	2	8.14975	9.12153	8.97154	6.96578	11.2192	12.479	11.7039	9.92035	10.4564	6.16993	11.5048	11.4686	11.7636	4.45943	9.98726	10.1472	10.0485	7.98299	10.1737	11.1026	11.4833	7.59991	7.47573	8.36632	10.8082	6.64386	16.8878	8.40939	10.668	11.7711	13.5248	14.0969	9.35094
						TCGA-BLCA	TCGA-K4-A3WS	0	761	white	66	1	2	10.2609	8.76155	10.128	10.3554	10.9418	12.3842	11.628	9.24793	10.4909	5.32193	11.3264	11.9633	10.5157	2.32193	10.9344	11.6582	9.55842	9.07948	10.0901	11.4803	12.3185	9.07682	9.59246	10.6926	10.3794	7.49985	15.1626	9.07414	10.5118	10.1447	12.7607	12.8857	11.2033
						TCGA-BLCA	TCGA-E7-A6MD	0	129	white	66	1	2	10.1228	8.14466	9.62753	8.27146	10.7364	12.9767	12.3691	10.8971	10.7022	7.89482	11.0768	11.8634	11.8202	2.58496	11.3343	11.6861	9.59805	8.82972	10.3923	11.6073	12.8903	8.9629	8	9.03617	10.6165	7.25739	15.6807	9.67419	10.8001	10.3443	12.841	12.8887	9.29232
						TCGA-BLCA	TCGA-GU-A764	0	610	white	66	1	1	10.5118	9.41151	10.6653	8.42206	11.1033	12.2723	12.041	9.93958	11.6653	7.01123	12.0217	12.5925	12.0937	8.24317	11.8467	12.6676	11.1911	8.95128	10.2527	11.5732	13.4037	8.51964	7.82018	9.44708	11.4929	5.72792	16.1643	10.2082	12.757	13.2273	13.5777	12.2345	13.0213
						TCGA-BLCA	TCGA-4Z-AA7M	0	495	white	65	1	2	10.8146	10.0417	9.19967	6.44294	10.6627	10.9542	11.1618	10.2082	10.5058	7.06609	12.0868	12.0812	11.463	1.58496	10.7657	11.2306	10.1799	6.75489	10.7262	11.7078	12.683	5.88264	6.40939	8.18488	11.9665	5.12928	14.5269	9.87191	11.4051	11.838	12.0189	10.0861	10.1762
						TCGA-BLCA	TCGA-DK-A1AG	0	475	white	65	1	2	10.6926	9.88417	9.91289	5.72792	11.7936	13.6278	12.5565	9.64386	11.2715	9.10066	12.0701	11.6147	12.6902	2	11.5137	11.3454	10.9636	7.33092	10.5878	11.5033	13.2213	7.97728	6.98868	8.00562	10.7022	8.59619	17.1862	9.67066	11.2192	11.4645	13.4773	11.923	10.6248
						TCGA-BLCA	TCGA-ZF-AA5P	0	372	white	65	1	2	10.2981	8.9571	9.39446	11.5985	10.8297	11.9341	11.412	8.81698	10.6027	6.2854	11.9155	11.6733	10.9322	4	10.7389	11.3778	9.57554	9.9571	9.73302	10.6475	11.9509	10.3869	8.92184	10.6519	9.35975	8.08746	15.0971	8.8392	10.8447	10.4767	12.1671	11.1886	10.2773
						TCGA-BLCA	TCGA-BT-A42F	0	864	white	64	1	2	10.2252	11.1053	10.8711	2	10.973	13.77	12.5113	9.35975	10.9887	7.62936	12.1991	12.021	11.6096	4.08746	11.6587	13.5238	11.196	9.24555	10.4294	11.557	12.7087	7.8009	5.72792	6.85798	10.5098	5.45943	16.9256	9.57175	11.0546	13.0855	13.9772	15.389	11.7916
						TCGA-BLCA	TCGA-K4-A6MB	0	469	white	64	1	2	12.9224	7.37504	10.2773	8.67243	10.813	12.605	12.5753	10.0375	11.258	10.0954	12.3451	12.341	11.3354	4.24793	10.0701	11.5435	10.7624	8.43045	10.3761	11.3214	12.8887	8.81698	9.27612	9.59059	11.4853	8.06609	15.8461	9.88111	11.8865	11.9304	13.8252	11.0417	11.9166
						TCGA-BLCA	TCGA-GD-A6C6	0	67	white	64	1	2	8.27146	10.2264	8.07146	4.32193	10.8329	13.0568	12.5882	6.91886	11.0694	5.58496	11.3066	10.4929	10.6448	2.32193	9.67419	11.7419	12.4481	6.75489	10.6528	11.1248	10.9099	6.72792	5.35755	6.62936	9.08215	7.81378	14.4978	7.25739	10.7549	11.2149	13.442	12.0731	10.1861
						TCGA-BLCA	TCGA-BT-A42C	0	873	white	64	1	1	11.0674	9.16993	9.91737	6.85798	11.5275	14.1486	12.5953	10.3608	11.7013	6.58496	12.2857	12.4793	12.4333	5.55459	11.7486	12.1749	12.0396	7.06609	11.5372	12.1605	12.9837	8.24317	6.83289	8.73471	12.8657	8.7039	16.5673	10.3576	11.8186	12.6582	13.2656	10.4325	10.2408
						TCGA-BLCA	TCGA-DK-AA6U	0	578	white	64	1	1	11.032	9.3443	10.5584	8.65105	11.3663	12.5491	11.8914	10.8619	11.0437	6.26679	12.9848	12.2738	11.9263	3.70044	10.6511	12.729	11.2485	6.52356	11.1383	12.3531	13.2949	7	6.02237	8.99718	11.838	6.14975	15.7847	10.1072	12.1596	12.4924	12.9547	11.2186	11.5727
						TCGA-BLCA	TCGA-DK-AA6M	0	1582	white	64	0	1	9.224	10.2312	9.65105	4.58496	10.4273	12.0234	11.9281	9.01681	9.74819	7.36632	11.6032	11.3531	9.08481	3.16993	10.275	12.5748	10.4625	9.45943	10.0042	11.058	12.2938	7.35755	5.32193	8.51964	10.7423	6.16993	16.1234	9.35535	11.5646	11.2521	14.5324	12.1908	10.4325
						TCGA-BLCA	TCGA-DK-AA76	0	366	white	64	0	1	13.2035	8.55842	9.2503	8.61102	10.8455	11.0755	10.5411	9.86264	10.7117	3.32193	11.3869	11.6926	12.2167	2.58496	9.51373	11.4455	10.23	7.17991	10.3487	11.2192	12.6373	6.22882	5.9542	8.47573	10.8178	6.55459	14.434	9.72281	11.0993	11.3701	13.326	8.79766	10.7271
						TCGA-BLCA	TCGA-UY-A8OB	0	2109	white	63	1	2	8.98584	8.80735	10.3923	3.45943	10.1421	11.8029	11.8482	8.93369	10.6129	5.85798	11.8301	12.0934	12.8731	5.16993	11.5708	11.6004	10.9908	8.83605	10.0954	11.983	12.3115	6	4.08746	7.37504	10.098	2.58496	18.013	9.11114	12.2432	13.1636	14.2892	13.4847	10.8765
						TCGA-BLCA	TCGA-DK-AA6T	0	572	white	63	1	1	11.462	9.94398	9.67066	7.42626	9.79928	12.6255	12.4466	11.0861	10.7151	4.9542	11.8459	12.1504	9.65821	1	11.8681	14.3103	11.1364	7.55459	11.1687	11.5231	13.3359	7.91886	6.42626	8.09803	12.8727	6.83289	16.2706	9.94837	12.292	13.6219	12.1935	9.04712	8.43045
						TCGA-BLCA	TCGA-DK-AA6X	0	467	white	63	1	1	10.5812	7.8009	8.76818	9.03617	10.0042	11.5798	10.7082	9.54689	9.82177	5.12928	10.8933	11.043	9.9901	3.58496	10.1948	9.96578	9.60548	7.31288	10.1396	10.2527	11.7661	7.41785	7.32193	8.2854	10.9337	6.90689	14.9966	8.67948	11.352	10.9366	11.599	10.375	8.71768
						TCGA-BLCA	TCGA-FD-A5BY	0	251	white	63	0	2	11.4289	9.8392	9.69	6.64386	10.633	13.0028	11.1991	9.98726	11.0895	3.80735	12.0231	12.1261	12.0241	8.34873	11.8642	11.6658	10.4858	6.75489	10.0154	11.0768	12.7311	6.78136	7.49185	9.52552	11.1898	6.61471	16.6249	9.69174	13.2357	12.7264	14.2628	11.8074	10.137
						TCGA-BLCA	TCGA-UY-A78L	0	1127	white	62	1	2	9.97585	10.4252	10.0498	5.52356	10.8353	12.9192	12.2137	10.0182	10.8353	6.82018	12.0845	12.8605	13.1715	6.82018	12.1193	11.4147	11.2246	12.2426	10.3815	12.2318	13.4583	6.88264	6.76818	8.62936	10.2738	5.20945	16.7039	9.84706	12.3731	12.1833	14.4601	14.2691	11.4025
						TCGA-BLCA	TCGA-DK-A3IT	0	648	white	62	1	2	10.7245	9.19476	10.9016	8.9542	11.3191	13.2348	11.6671	9.77808	10.8971	8.89482	13.2502	12.4213	12.6303	3.45943	11.5003	12.7337	11.3696	8.77149	10.4574	11.6484	12.8285	9.11114	7.71425	9.3443	11.0458	7.02237	16.9115	9.45738	12.1755	13.4045	12.2868	12.2264	10.7398
						TCGA-BLCA	TCGA-GU-A766	0	480	white	62	1	1	9.18488	12.674	9.67243	7.70736	10.9593	12.5718	12.8112	9.59991	11.2198	7.17991	12.5911	12.2671	12.7809	9.90539	10.9694	11.3875	11.4078	8.81378	12.5746	12.55	12.8431	8.2384	7.40939	7.97728	9.93517	8.13443	16.4756	9.43671	12.1209	12.3518	14.0786	14.2097	10.5584
						TCGA-BLCA	TCGA-GC-A3YS	0	758	white	61	1	2	11.5971	11.8619	10.0375	6.14975	11.4909	12.4123	10.933	9.87344	10.4959	6.2854	11.8865	12.2972	10.3783	2.32193	11.3095	11.8819	10.0526	8.14975	10.375	11.9458	12.6651	7.54689	7.48382	9.56415	10.4838	5.75489	16.5558	10.0954	12.174	11.5646	14.3723	12.8782	11.4257
						TCGA-BLCA	TCGA-4Z-AA84	0	460	white	61	1	2	10.8895	9.15735	10.7347	5.04439	10.8803	12.5637	12.3864	9.30378	10.9527	10.2586	13.0843	12.599	11.9542	3.58496	11.4707	14.2682	10.8757	7.76155	10.9801	12.2348	13.0556	6.84549	6.26679	7.19967	9.77314	8.71425	14.8743	10.2204	11.0021	11.817	14.3832	11.6461	11.8545
						TCGA-BLCA	TCGA-ZF-A9RL	0	2703	white	61	1	1	11.2456	5.12928	7.77479	5.32193	9.99718	12.4939	11.7228	10.4929	10.8154	4.45943	11.7694	11.1344	12.4684	3	11.0808	9.98726	9.92184	4.58496	10.2668	11.2318	12.8523	6.10852	4.39232	7.8392	11.557	9.18982	15.4215	9.41151	10.6978	11.5231	13.0086	6.76818	9.60918
						TCGA-BLCA	TCGA-DK-A6B0	0	2330	white	61	1	1	11.1655	7.32193	8.32193	7.39232	10.9001	13.2553	12.5729	9.56986	11.2981	7.44294	11.8273	11.3476	12.6551	3	11.0021	11.9848	10.446	6.82018	10.7715	11.3382	12.1111	7.54689	6.08746	7.58496	9.50184	8.84549	17.2648	9.11894	10.8857	9.99435	13.9814	10.1636	9.26209
						TCGA-BLCA	TCGA-DK-AA77	0	618	white	61	1	1	11.4142	8.41363	9.9571	4.80735	10.7944	12.8887	10.8933	10.1033	11.4393	7.19967	12.3012	12.164	14.2589	3.32193	11.4661	9.70736	9.91737	6.80735	9.93517	11.4268	12.9465	7.6865	7.07682	7.24793	10.8258	8.66888	16.6139	9.76653	11.8074	12.2225	12.9687	12.7545	9.82018
						TCGA-BLCA	TCGA-XF-AAN5	0	2293	white	61	0	2	9.85331	9.40514	9.19967	1.58496	9.66888	11.0627	11.7048	8.96	9.66356	5.52356	11.3225	11.363	11.5873	7.70736	10.944	10.796	9.73302	5.78136	10.84	10.2264	12.6733	5.45943	5.35755	7.78136	11.2802	4.75489	15.5424	9.45738	11.5732	11.5603	14.4464	11.6768	9.92926
						TCGA-BLCA	TCGA-FD-A5C1	0	1792	white	61	0	2	9.72792	10.6366	9.16993	5.24793	10.6221	12.9311	12.6508	9.23601	10.8114	5.85798	11.8321	11.6216	11.4823	4.08746	10.683	11.7727	11.4179	7.62936	11.1254	12.1059	11.7591	7.40939	7.17991	8.03342	9.43463	6.16993	16.7522	8.27146	11.7964	11.9121	13.9284	13.7844	11.032
						TCGA-BLCA	TCGA-ZF-AA58	0	1649	white	61	0	2	11.0437	8.98014	9.78463	7.20945	11.7368	12.3168	12.5831	10.4625	11.2473	6.65821	12.4966	12.563	12.4633	3.32193	12.3939	11.8777	10.5632	8.24793	11.4263	11.318	13.2513	7.70044	7.44294	8.37504	10.988	5.70044	16.2722	9.71425	12.7343	12.3611	13.3139	13.6388	11.7883
						TCGA-BLCA	TCGA-E5-A2PC	0	1326	white	61	0	2	12.0788	10.6202	11.4152	3.90689	11.6344	13.6917	13.663	10.5962	11.9524	6.08746	12.4089	13.2187	12.1793	11.7694	12.5162	14.0239	11.3767	6.33985	11.7908	11.7056	13.8696	8.69697	7.22882	9.16993	11.3832	6.39232	18.1598	10.4979	12.784	12.8531	15.5969	13.1043	11.1662
						TCGA-BLCA	TCGA-DK-AA6S	0	5050	white	60	1	2	9.44915	9.6987	9.8009	7.29462	10.5981	12.3786	10.7707	9.09276	10.3837	6.35755	11.2527	11.2837	10.6821	2.58496	9.9263	10.42	9.73978	6.6865	9.99718	10.8603	11.4294	7.17991	8.69	9.78463	10.5206	7.49985	15.6746	8.73809	10.8281	10.4818	12.6059	12.2929	9.85019
						TCGA-BLCA	TCGA-G2-AA3D	0	2139	white	60	1	2	11.2773	7.37504	9.87344	8.48382	11.388	13.3385	12.2327	9.77808	10.7632	8.05528	11.8986	11.9436	12.2671	2.32193	10.352	11.0688	10.1396	6.14975	10.6321	10.9651	12.2444	6.65821	4.45943	7.94251	10.421	8.20457	16.4415	8.8392	11.4299	12.2553	11.858	10.0471	10.4838
						TCGA-BLCA	TCGA-4Z-AA89	0	1029	white	60	1	2	10.2656	7.29462	8.58496	5.52356	10.2119	12.8441	12.0307	8.78463	10.4409	6.53916	11.4168	11.1331	12.7989	3.90689	10.8734	11.1124	10.3934	5.83289	10.0485	10.9084	12.4803	6.24793	3.80735	6.93074	10.2058	7.50779	16.7616	8.89785	10.858	10.9929	12.4078	9.93958	9.10066
						TCGA-BLCA	TCGA-FD-A3SP	0	783	white	60	1	2	11.4883	8.79766	10.2597	8.56605	11.7985	11.7616	12.0105	10.1137	11.0735	5.39232	12.5433	12.0238	11.9385	1.58496	10.7574	12.5765	9.78136	9.37938	9.73978	11.5713	12.5736	8.6865	8.85487	10.4949	12.0189	7.17991	16.5756	9.34207	11.5575	11.5788	13.0319	13.3552	11.8158
						TCGA-BLCA	TCGA-FD-A6TK	0	330	white	60	1	2	10.0861	11.9495	10.8564	8.29002	11.0444	12.7345	12.4091	9.62753	11.4142	7.80735	11.7977	12.2402	11.7134	9.35975	11.2946	12.9078	10.6321	9.4818	10.9016	11.3597	12.23	8.70736	8.56605	9.40939	10.8194	8.17991	16.6412	8.86728	12.2306	12.4491	13.8003	14.3132	10.3376
						TCGA-BLCA	TCGA-FD-A3NA	0	1845	white	60	1	1	10.8234	9.65105	11.2556	7.37504	11.4512	12.8769	13.2163	10.5236	11.679	7.70736	12.791	12.3399	12.8088	6.65821	12.1743	12.3958	11.4868	9.02237	11.2264	12.6937	14.2109	7.17991	7.58496	9.63118	11.5845	8.47168	16.4084	10.6653	11.9611	13.4204	13.6817	12.7942	10.9396
						TCGA-BLCA	TCGA-ZF-AA53	0	1761	white	60	1	1	10.4019	10.1636	8.16491	5.78136	10.4491	11.9589	10.8834	9.43254	10.0701	3.70044	11.2003	11.5651	12.8293	6.97728	10.3554	12.3362	10.716	6.96578	9.85331	10.9944	12.4163	8.64386	6.65821	7.63662	10.3805	4.32193	16.4481	9.12153	11.3202	11.151	13.9986	12.7736	10.1434
						TCGA-BLCA	TCGA-4Z-AA7Y	0	1522	white	60	1	1	12.2158	7.74819	8.71081	4.08746	10.5068	12.3845	12.3487	10.2312	10.7381	6	11.8321	11.7908	14.8185	5.04439	11.3998	11.0961	9.37721	7.97728	10.5137	11.3078	12.9748	8.08215	7.39232	8.99152	11.3783	8.79766	17.3528	8.90388	12.5596	12.988	12.9135	9.74315	9.15482
						TCGA-BLCA	TCGA-ZF-AA5H	0	897	white	60	0	2	11.2155	9.30378	10.6839	5.90689	10.8009	12.4745	12.4265	11.2958	11.1453	7.13955	12.211	12.3934	12.5985	9.01959	11.8746	14.0454	10.8925	6.42626	10.9432	11.9385	13.8975	6.87036	7.14975	8.05528	10.6944	7.40088	17.5859	10.8074	12.8238	12.967	14.129	12.6731	11.2946
						TCGA-BLCA	TCGA-XF-A9SY	0	640	white	60	0	2	9.68124	10.3783	10.8329	4.58496	11.1731	11.1536	12.128	9.62022	9.97154	7.34873	11.96	12.2095	12.2137	4.24793	11.5503	11.9733	9.9542	5.55459	10.7056	10.8603	12.6996	6.91886	6.90689	8.37938	10.4979	5.75489	16.2112	9.98726	12.9965	12.0032	13.1103	13.562	10.043
						TCGA-BLCA	TCGA-ZF-A9R5	0	1090	white	59	1	2	11.1923	9.13699	9.2503	10.0279	11.3471	12.8023	12.3225	9.53722	10.7928	3.16993	12.3829	11.0423	13.1773	2.32193	10.2527	10.1523	9.94837	6.22882	11.2848	11.2288	12.6405	6.44294	5.88264	8.69349	11.6371	10.5028	15.8561	9.58308	10.5177	9.24317	13.5499	12.7241	10.7969
						TCGA-BLCA	TCGA-GV-A3JX	0	581	white	59	1	2	11.741	10.0701	11.4409	8.47168	11.2402	11.6834	12.6689	11.6294	11.0272	9.0634	12.7052	13.3327	12.6591	7.97154	11.7013	12.7809	10.4294	7.34873	11.3443	12.1926	13.5498	10.2082	6.65821	10.4707	11.8122	7.19967	15.9211	10.6987	13.3536	13.1709	13.8263	12.1033	11.4046
						TCGA-BLCA	TCGA-K4-A54R	0	842	white	59	1	1	10.0084	10.2773	8.97154	3.70044	12.764	12.6154	10.8971	9.65105	10.4409	8.44708	11.8238	12.0841	13.2163	6.61471	11.1176	11.3548	9.8857	5.88264	10.7194	11.2568	12.1196	5.90689	6.98868	7.12928	10.5147	5.12928	15.9094	9	12.4173	12.327	12.1392	12.5447	9.5157
						TCGA-BLCA	TCGA-GC-A3RC	0	484	white	59	1	1	10.1599	10.5324	10.9687	2.58496	10.0901	11.6786	12.0782	10.3542	10.3531	7.05528	12.4916	12.8307	13.7561	7.2854	11.4717	11.3515	10.032	5.85798	11.239	11.2216	13.0362	7.21917	6.50779	8.31741	11.2784	5.78136	16.8628	9.91886	13.7285	12.4486	13.4674	11.722	10.8146
						TCGA-BLCA	TCGA-XF-AAMQ	0	2177	white	59	0	1	11.7545	8.69697	11.1079	5.97728	11.5722	13.2012	13.0815	11.0389	11.0362	3.80735	12.1827	13.3426	12.5355	5.90689	12.2509	12.6407	10.8696	7.19967	11.4346	11.4062	13.545	7.60733	7.67243	8.13443	12.0792	9.31967	17.3441	10.3641	13.018	12.7812	13.5101	13.9783	10.9915
						TCGA-BLCA	TCGA-FD-A6TA	0	1912	white	58	1	2	11.2288	8.55459	9.10329	8.02791	10.3083	12.1306	12.5646	9.74147	10.5028	5.70044	12.9379	11.4533	11.5522	6.40939	10.1599	10.8082	10.6707	7.40088	9.16239	11.3253	12.5041	7.04439	7.40939	8.85798	10.1972	7.11894	16.4119	8.65821	10.7245	11.2831	12.4569	11.3526	9.32193
						TCGA-BLCA	TCGA-CU-A3QU	0	158	white	58	1	2	12.9598	8.13955	10.6393	5	10.1459	12.5892	10.6129	11.6587	11.0708	6.59991	12.101	12.8317	12.3132	3	11.6874	11.7402	10.4798	7.91289	11.236	11.5603	13.6998	7.8009	6.08746	9.56796	12.1196	5.75489	15.5017	10.3977	12.863	12.9149	12.7655	10.1007	10.4727
						TCGA-BLCA	TCGA-DK-A3WW	0	633	white	57	1	2	11.713	10.9084	10.1724	2.32193	10.8297	12.4075	12.7317	10.4635	10.9614	4.08746	12.6742	12.3565	13.3347	1.58496	11.3761	11.647	10.7398	5.80735	11.794	11.8122	13.719	7.8392	6.74147	8.30834	10.102	4.75489	16.8075	10.69	12.1621	13.0529	14.4589	15.4355	10.7928
						TCGA-BLCA	TCGA-DK-A1AA	0	578	white	57	1	2	11.7104	9.13699	10.5718	6.08746	11.4205	12.8457	13.2041	10.2808	11.1768	8.35315	12.7035	12.4528	12.7099	4.9542	11.7777	11.6375	10.4419	7.63662	11.2137	11.819	13.4305	7.99435	8.58871	9.25267	10.3815	9.6865	17.547	10.1636	11.8478	11.4666	13.1646	11.0007	9.73132
						TCGA-BLCA	TCGA-DK-A6B6	0	1115	white	57	1	1	11.3934	7.32193	8.54303	5.64386	9.75656	11.4372	11.3083	9.46557	10.5147	4.24793	10.7912	11.2149	12.4707	0.01	11.0265	11.0196	9.56796	5.2854	10.8106	10.6502	12.0403	5.64386	5.55459	8.12412	11.1312	9.87036	14.5165	9.2738	10.7065	11.1325	13.0607	11.5967	10.5584
						TCGA-BLCA	TCGA-FD-A5BR	0	813	white	57	1	1	10.9549	8.10329	9.85643	9.85331	11.0505	12.8429	11.6573	9.70736	10.8218	6.59991	11.5236	11.2234	12.5333	2.58496	9.61102	11.7801	9.7879	8.53138	10.1059	10.9174	12.3918	8.26209	7.29462	8.69349	11.3998	8.41363	15.6453	9.27612	10.6996	11.0231	12.5425	11.4289	9.99435
						TCGA-BLCA	TCGA-G2-A2EK	0	485	white	57	1	1	12.9035	9.01402	10.5401	10.9679	11.6817	12.8471	11.4569	10.0821	10.6644	7.59991	12.8941	11.8784	11.7908	6.62936	10.6618	11.3404	9.45121	9.01402	10.445	11.3875	12.6076	8.62205	8.46352	11.1929	11.7887	10.9694	16.062	10.0848	11.6636	10.0251	12.3468	10.3117	11.3197
						TCGA-BLCA	TCGA-E7-A3Y1	0	163	white	57	1	1	8.88264	6.80735	8.52356	8.09803	10.6786	12.9665	12.1904	8.45533	10.568	5.04439	11.1954	11.2318	12.2553	4	9.48583	10.0928	10.0182	8.29002	9.83447	10.9114	12.0413	8.17991	8.11374	8.77149	10.062	7.78136	15.9044	8.62571	10.3219	9.97154	13.8299	8.45943	10.716
						TCGA-BLCA	TCGA-ZF-AA4W	0	1830	white	56	1	2	10.0168	9.66356	8.74819	4.80735	11.0091	11.9737	12.2258	9.16742	10.7406	7.67243	10.978	11.7624	12.1157	6.72792	10.8865	11.7977	10.8408	8.2384	10.9556	10.4564	13.0875	7.33985	5.04439	7.36632	9.53722	4	16.4974	10.1447	12.1874	12.3109	15.3091	14.0726	10.7142
						TCGA-BLCA	TCGA-K4-AAQO	0	359	white	56	1	2	10.888	8.88264	9.89785	11.1699	10.3923	12.3788	11.3559	9.47978	10.4502	6.55459	10.9844	11.5338	11.0505	2	9.75822	11.1344	9.42836	8.99718	9.67596	10.5651	11.7669	9.88874	8.13955	10.137	9.29002	8.40514	15.129	8.61102	11.0768	11.4722	12.4643	10.3531	9.40727
						TCGA-BLCA	TCGA-ZF-AA4X	0	2044	white	56	1	1	12.4658	5.52356	10.749	5.55459	10.4645	12.0664	11.5746	10.7065	10.3117	9.07682	11.7834	12.6211	12.474	3.32193	11.5708	11.3072	9.88722	5.9542	10.6821	11.5018	12.5118	5.97728	4.64386	8.92778	11.6366	6.62936	15.7867	9.42206	12.7115	12.4876	12.8451	10.1459	11.0782
						TCGA-BLCA	TCGA-LT-A5Z6	0	474	white	56	1	1	11.764	7.41785	10.4073	5.20945	9.56986	11.3038	10.7993	11.3117	10.1662	6.65821	10.6064	11.7611	12.2897	1.58496	10.927	11.0855	9.29002	6.83289	10.2119	12.0671	13.1822	6.80735	5.64386	8.59619	10.8611	6	15.1703	10.1497	12.5505	12.527	12.4273	9.23362	10.4615
						TCGA-BLCA	TCGA-FD-A3B8	0	384	white	56	1	1	10.6891	10.6421	11.6138	10.9622	11.5068	11.7368	11.8876	10.5689	10.3365	5.85798	12.1596	12.2577	10.8494	4.32193	11.1241	12.1954	10.0901	9.80252	10.8313	10.9315	12.5016	10.0251	10.1396	11.2837	10.7822	8.29462	16.6045	9.63481	11.9553	12.4778	12.7471	15.9017	10.8234
						TCGA-BLCA	TCGA-G2-A2EJ	0	1460	white	56	0	1	10.1202	10.4848	11.0532	5.67243	10.5868	12.6963	13.2866	11.0634	10.7582	10.6944	12.0255	13.2093	14.6434	3.32193	11.3197	13.0951	10.7185	5.85798	8.04439	12.277	14.2041	6.61471	6.64386	8.37504	11.0217	5.35755	17.2386	11.4057	12.6055	13.1561	15.1725	14.9916	10.9506
						TCGA-BLCA	TCGA-GV-A3JZ	0	603	white	55	1	2	11.3264	9.86419	10.032	6.32193	10.7657	12.1463	12.9427	10.6519	11.9705	6.24793	12.2183	12.1898	13.3977	6.20945	10.7499	11.8838	12.4564	7.35755	11.5934	12.5969	12.808	7.03342	8.89785	10.3354	11.8681	7.27612	16.9998	9.92035	12.9658	13.0622	13.9064	10.9658	10.9491
						TCGA-BLCA	TCGA-4Z-AA7W	0	840	white	55	1	1	8.65464	10.1762	8.61471	6.02237	10.4707	14.0743	11.7389	8.85487	11.1674	5.58496	11.6298	11.899	9.46964	5.32193	10.7125	11.5162	11.6524	10.3772	10.2761	11.1793	11.7698	6.20945	4	6.97728	9.65464	5	16.5732	8.98584	10.2958	12.658	14.33	15.1979	10.4818
						TCGA-BLCA	TCGA-GC-A3RB	0	582	white	54	1	2	11.1561	10.2155	11.611	5.58496	12.2814	14.2794	12.4714	10.0512	11.4305	7.87036	13.4685	12.7991	13.447	2.58496	11.6434	12.9361	10.6275	7.75489	11.3619	12.7752	14.7665	8.19967	5.75489	8.86419	11.8622	10.0593	17.2264	11.5873	13.4073	13.8618	13.8767	13.0831	11.0748
						TCGA-BLCA	TCGA-BT-A2LA	0	522	white	54	1	2	12.0617	9.8857	10.8305	10.9908	12.5798	12.7237	12.3737	11.4661	11.9819	9.59432	13.2333	13.4367	12.6996	2	11.9776	12.4615	10.137	9.60363	10.9114	11.2592	13.94	11.381	8.86109	8.86109	12.8447	9.24793	16.0967	11.0314	13.587	12.2372	13.8942	10.4083	12.3236
						TCGA-BLCA	TCGA-FD-A6TE	0	376	white	54	1	2	13.9908	9.64386	10.8471	8.78136	10.014	11.9926	11.4003	12.1261	11.3614	6.14975	12.5051	13.0998	14.1504	2.80735	12.0775	11.2088	10.9099	7.62205	11.2402	12.917	13.658	6.83289	6	9.54882	12.5925	6.24793	16.8961	10.6184	13.383	14.1629	13.6705	11.5416	10.0307
						TCGA-BLCA	TCGA-GV-A6ZA	0	691	white	54	1	1	11.9873	8.51964	9.91289	5.72792	11.7381	13.1364	12.1668	9.78463	11.5488	3.45943	12.1347	12.2186	12.1997	2	11.2621	10.1699	11.4009	7.03342	11.0741	11.722	13.7495	7.10852	5.9542	8.16491	10.6184	10.3685	15.8797	10.2336	11.6096	11.7528	13.6253	12.3435	11.4939
						TCGA-BLCA	TCGA-GD-A3OS	0	638	white	54	0	1	11.7155	10.623	11.4737	8.51964	12.7622	12.7719	12.4229	9.84549	11.8937	7.09803	12.9388	12.7632	13.3081	5.20945	12.6384	13.4398	10.545	7.96578	10.1812	12.3545	13.0731	9.08746	9.72451	8.45121	11.6073	7.62205	16.6634	10.7993	12.5454	12.1241	13.3264	12.4571	11.7228
						TCGA-BLCA	TCGA-DK-A1A6	0	2020	white	53	1	2	11.7797	7.99435	10.7674	5.16993	10.7048	12.6676	12.9876	11.2027	11.9922	7.40939	12.5285	13.6261	13.6381	3.16993	11.2662	9.74651	11.2234	7.07682	11.7309	12.782	13.7177	7.07682	7.36632	8.03892	11.318	5.45943	15.8785	10.6609	12.4375	13.8906	12.9629	15.3007	10.3432
						TCGA-BLCA	TCGA-H4-A2HO	0	46	white	53	1	2	11.5732	7.90689	8.5812	10.2854	9.56224	12.2189	12.4742	9.61471	10.875	6.93074	10.3977	10.1737	12.0123	8.20945	9.7211	9.89026	9.38802	9.39017	9.94398	10.2726	11.8262	8.56605	8.26679	8.37069	10.6375	7.87652	14.5983	8.57743	10.4502	8.79116	13.4731	9.00282	8.98868
						TCGA-BLCA	TCGA-GD-A2C5	0	812	white	53	0	2	11.5103	7.17991	10.3298	8.29462	13.9857	12.7194	12.722	8.82337	11.2107	5.90689	12.4448	11.6357	11.2095	3.16993	11.7801	11.3382	10.8439	8.49185	10.9121	11.88	12.958	8.68299	8.91588	10.224	10.5651	10.1935	16.3359	9.90087	11.6096	12.0861	12.2606	10.5038	11.0189
						TCGA-BLCA	TCGA-4Z-AA83	0	2024	white	52	1	1	10.0084	6.42626	8.3443	9.16742	11.4419	12.3726	11.4599	9.22882	10.218	9.86264	10.8345	10.6484	13.0358	4.45943	10.3923	9.71081	9.71768	7.40088	10.0458	10.7797	11.7381	9.56415	7.8009	8.10329	9.75822	7.42626	16.7468	8.48382	9.80413	10.3966	12.4255	12.392	8.95128
						TCGA-BLCA	TCGA-G2-A2EF	0	1884	white	50	1	1	11.683	11.1299	12.2571	5.61471	12.2866	12.5108	12.6987	10.9031	11.4788	2.58496	12.8144	13.3059	12.0007	5.70044	12.218	12.6917	11.1098	6.42626	12.5122	12.4853	13.9033	9.0954	8.17493	8.20457	11.1007	9.5812	16.9457	11.4599	12.8496	12.6234	14.5658	14.3009	12.5255
						TCGA-BLCA	TCGA-XF-AAMG	0	3364	white	49	1	2	11.3382	10.0808	10.218	6.22882	11.8545	12.1092	10.544	10.7185	11.5406	8.25267	11.6202	11.9819	12.4022	10.0795	9.87652	12.3531	11.1699	7.65105	10.6119	11.4533	12.649	8.12928	8.46352	9.06878	12.4615	6.61471	14.811	9.72962	12.169	13.458	12.77	10.3332	10.84
						TCGA-BLCA	TCGA-XF-AAMR	0	2790	white	48	1	2	12.2618	9.36632	10.9801	13.0751	12.0028	13.3468	13.19	11.2192	11.5003	7.52356	13.0333	12.5172	11.7406	11.8238	11.6161	11.9535	11.168	10.6671	11.23	11.6693	13.383	11.9337	9.83289	12.9629	11.9181	10.2058	18.0228	10.2444	12.3677	12.164	13.3712	12.0327	10.2324
						TCGA-BLCA	TCGA-UY-A9PB	0	899	white	48	1	2	10.6284	9.8933	10.1712	5.61471	11.5127	12.1098	11.6856	9.36413	10.5555	4.85798	11.5483	11.9982	12.2978	7.25739	11.4934	11.9244	9.63481	7.09803	11.2113	10.0028	12.2435	7.7879	7.05528	8.57743	10.29	5.39232	16.0658	9.05528	11.8447	11.7859	12.9003	13.9929	10.3465
						TCGA-BLCA	TCGA-GD-A3OQ	0	95	white	48	1	2	11.3576	10.062	9.86882	7.18982	11.1427	12.649	12.6136	10.4315	10.9218	7.88264	12.6647	12.6013	14.2987	9.75822	11.5177	11.3537	10.5324	6.87036	10.9196	11.5727	13.4934	7.40088	7.64386	9.08481	11.0175	7.46761	17.8485	10.0954	13.0541	13.06	14.3121	12.5994	10.9374
						TCGA-BLCA	TCGA-XF-A8HE	0	3817	white	47	1	2	10.6092	10.3696	11.4325	4.70044	11.1261	11.2842	11.9028	10.5196	9.49386	7.82018	12.5358	12.4123	13.2119	3.58496	10.9986	11.4257	10.2444	7.67948	11.1137	10.196	13.3261	6.88264	7.63662	9.03892	10.6582	5.72792	16.6483	10.5459	12.7511	13.6526	13.5615	14.6733	10.9694
						TCGA-BLCA	TCGA-GV-A3QI	0	1110	white	47	1	2	12.4017	8.77479	12.1402	7.94837	9.70908	11.4099	11.8361	12.2488	11.4569	9.2854	12.2712	13.1765	12.9706	6.14975	12.6396	11.2668	10.8273	9.18488	11.4263	11.9755	13.7978	8.29921	8.09276	11.611	13.6089	9.44087	16.3761	11.0634	14.2477	14.7221	13.6284	9.71768	12.1176
						TCGA-BLCA	TCGA-UY-A9PA	0	1072	white	47	1	2	10.6402	7.67948	9.48583	6.74147	9.94691	11.4357	11.6307	8.87036	10.1163	5	11.4818	11.1929	13.5342	6.12928	10.7406	10.6926	9.3443	6.24793	11.7932	11.0042	11.7801	5.24793	4.16993	7.32193	10.9658	8.16491	16.6777	8.76487	10.7715	10.8353	12.8396	13.0301	9.0607
						TCGA-BLCA	TCGA-DK-A6B5	0	1542	white	45	1	2	13.646	11.8439	11.4635	7.16993	11.5718	13.2994	11.7262	10.8711	11.2691	10.5392	12.4226	12.6609	12.4017	4.45943	11.6729	12.3242	10.0835	9.32193	10.0875	12.0741	13.1547	8.224	6.12928	7.46761	10.2155	6.67243	15.9222	10.0808	11.1929	12.4094	13.5536	14.3075	10.5078
						TCGA-BLCA	TCGA-E7-A7DV	0	37	white	44	1	2	11.0126	10.66	10.1319	3.45943	12.1264	13.3819	13.4005	10.1447	11.6461	1	12.0775	11.5807	11.7507	4.32193	12.4284	13.8072	12.3058	10.9929	11.6996	11.8482	13.6721	8.58496	6.39232	8.90388	9.21189	7.69349	17.344	9.69697	11.7503	12.6396	13.6491	14.0517	11.7056
						TCGA-BRCA	TCGA-C8-A12Q	1	385	asian	78	0	2	12.2432	9.04712	10.6609	8.35755	11.8289	12.2738	13.1357	11.062	11.4676	9.97011	12.6414	13.0913	12.6291	2.58496	11.4057	13.1172	12.7981	9.19967	11.7616	11.8553	13.7199	8.86419	9.76984	11.1972	10.8549	9.04439	16.7149	10.4767	12.221	11.9495	13.4949	13.2193	11.4331
						TCGA-BRCA	TCGA-C8-A3M7	1	1034	asian	60	0	2	11.6511	8.66178	11.4979	10.0307	10.7398	11.0701	12.3655	10.783	11.1485	10.8001	11.902	12.8553	12.4788	3.70044	10.4828	12.1981	10.3185	11.3498	10.6847	11.6636	13.3354	11.3371	11.4357	12.4916	11.2473	8.69697	14.76	10.3072	12.3501	11.0815	13.6634	12.0678	10.809
						TCGA-BRCA	TCGA-A1-A0SK	1	967	asian	54	0	1	12.7015	8.13443	11.4257	6.37504	10.6689	10.3376	13.6577	12.1787	12.0522	9.56033	13.5853	13.9598	12.88	4.45943	12.1147	11.4838	12.2612	6.59991	11.5967	12.6569	14.3861	9.76653	7.59991	10.4788	14.5761	6.80735	16.3074	12.3287	14.9889	13.4025	13.9304	9.44708	12.7777
						TCGA-BRCA	TCGA-C8-A26Y	0	394	asian	90	0	1	12.9276	8.78136	12.5258	7.08746	10.5177	11.973	13.9337	12.1718	12.5706	11.8994	12.8057	13.9728	16.0688	6.49185	12.366	12.5164	11.7665	8.04985	11.4445	12.5915	13.709	7.87652	8.06609	8.98299	11.8376	5.9542	16.7279	11.1917	13.1591	14.0596	14.9864	11.5708	12.3052
						TCGA-BRCA	TCGA-C8-A131	0	411	asian	82	0	2	10.1636	8.27146	9.66356	4.85798	10.5401	13.5624	13.2928	9.96723	12.2113	10.4727	11.6443	12.2912	12.4653	3.16993	10.716	12.0818	11.7649	8.20945	10.4336	12.5682	13.3319	7.76818	8.69	9.17243	13.0481	6.65821	16.4291	9.58308	12.0505	11.8361	13.5389	12.407	11.4393
						TCGA-BRCA	TCGA-C8-A12K	0	0.5	asian	80	0	1	11.8665	10.1861	11.8918	9.45327	11.5684	13.0329	13.7734	12.2732	11.8777	7.44294	12.5694	13.7197	12.174	3.32193	12.1984	12.556	12.6371	8.17493	11.7973	12.6698	15.1631	7.60733	7.56224	8.35755	13.0509	5.93074	15.6862	12.0881	14.1341	12.7112	14.3997	14.6505	12.511
						TCGA-BRCA	TCGA-C8-A1HM	0	375	asian	74	0	1	11.1787	9.94544	10.5459	10.7177	10.23	11.221	13.4776	11.4325	10.8471	9.22159	12.4471	13.23	11.7764	3.16993	12.4226	10.8361	12.6101	6.30378	11.3515	11.7172	13.4136	7.10852	5.72792	9.94105	11.4605	6.72792	15.4369	11.0855	13.3336	12.7457	13.7869	12.568	10.888
						TCGA-BRCA	TCGA-C8-A12M	0	358	asian	70	0	1	11.6161	7.59991	9.41151	11.2603	10.697	12.0105	12.1328	10.4969	10.1383	7.61471	11.8293	11.8114	14.5373	2	10.6339	10.0674	13.0303	8.66178	10.3707	10.9181	13.7309	8.15482	8.45121	9.82496	11.1111	6.83289	14.9432	10.9965	11.8289	11.1427	12.8794	10.0112	10.6804
						TCGA-BRCA	TCGA-C8-A3M8	0	394	asian	68	0	1	11.8388	9.83131	11.5985	12.5191	10.9241	12.5071	12.9296	11.703	11.2107	10.5999	12.3945	12.9624	14.4614	3.16993	10.8781	12.6939	12.8574	10.2969	10.8353	12.2046	13.8399	9.99435	9.5216	10.2515	11.5118	7.30378	16.1998	10.7632	12.9527	12.129	13.4987	13.4267	12.4757
						TCGA-BRCA	TCGA-C8-A12L	0	363	asian	67	0	1	10.3498	9.7364	11.5255	4.32193	11.1466	12.1383	12.8194	10.5603	11.0464	11.2784	12.9377	13.7257	14.2982	4	11.5779	11.9954	12.4954	7.44294	10.7465	13.3069	14.227	6.71425	7.47573	10.332	11.0471	8.61471	16.814	10.9679	12.7309	12.966	12.9952	13.4414	12.4126
						TCGA-BRCA	TCGA-PE-A5DD	0	1953	asian	64	0	1	9.78953	8.73132	10.3652	12.4976	10.4419	12.0293	12.3807	9.87191	10.9901	8.60733	11.1408	11.8727	11.6658	3	9.49586	12.1846	10.2336	9.39874	9.60177	11.2796	12.6407	9.52748	8.65464	9.50184	10.3432	7.09803	14.3962	9.15228	11.381	10.2866	13.0238	12.3548	10.9665
						TCGA-BRCA	TCGA-C8-A135	0	393	asian	64	0	1	11.1033	8.0607	9.74987	7.9542	10.5294	12.8269	13.2275	10.2131	11.2479	10.2479	12.647	12.7048	11.7	1	10.3038	11.6546	11.3896	9.13443	9.94251	11.5048	13.5377	8.56986	8.53138	9.94105	11.8634	7.03342	16.2043	10.446	11.749	13.087	13.6681	11.3826	11.0681
						TCGA-BRCA	TCGA-C8-A274	0	508	asian	63	0	1	11.8158	10.0084	11.3015	11.8891	10.9607	11.7952	13.7552	11.4954	11.5751	10.2095	12.4993	13.1235	13.6381	1	11.7288	12.2246	11.7207	6.58496	10.4179	12.4281	13.9059	7.13955	7.59246	8.91588	11.4205	6.47573	16.1286	11.4455	13.2559	12.3515	13.7439	11.994	12.4091
						TCGA-BRCA	TCGA-BH-A0HW	0	1561	asian	62	0	1	11.255	7.32193	10.8657	7.55459	10.8803	12.1469	12.8182	11.6573	11.1286	8.27612	12.3301	12.4265	14.3095	0.01	11.0914	12.1555	13.7008	8.60733	10.7952	11.8922	14.1217	8.40939	8.09276	14.6899	11.2946	6.90689	16.2663	10.813	12.9787	11.0175	13.3794	10.4543	11.4538
						TCGA-BRCA	TCGA-C8-A12X	0	385	asian	62	0	1	9.67596	7.56224	9.82814	6.64386	9.13699	12.1039	11.6407	9.59805	10.0539	9.04166	11.0334	11.4051	11.368	0.01	9.33539	12.5061	10.7944	8.03892	9.68475	11.1183	12.1545	6.94251	7.2854	8.62205	8.51175	4.39232	14.0369	9.46964	11.357	10.8471	12.2544	11.6952	9.51767
						TCGA-BRCA	TCGA-C8-A278	0	297	asian	61	0	2	11.664	9.40088	10.3674	12.1389	11.0028	11.4481	13.1106	11.0987	11.9701	10.1712	13.0483	13.4658	14.286	1	10.7423	12.9972	11.6064	7.59246	11.4041	12.0815	13.7261	7.67243	9.0954	9.56224	12.6163	7.89482	16.2237	10.4696	12.5023	13.3184	13.9845	11.9285	13.0147
						TCGA-BRCA	TCGA-C8-A8HP	0	396	asian	59	0	2	10.0821	9.42206	10.218	11.4656	11.5722	12.5927	12.1039	9.12412	11.5221	12.5901	12.713	12.1196	12.7266	2.58496	9.13955	13.2175	13.5906	8.24317	9.66888	11.0244	12.0168	7.73471	7.19967	8.44708	10.4686	6.04439	15.1956	8.89482	11.8361	11.716	13.1791	13.0585	10.5641
						TCGA-BRCA	TCGA-C8-A26Z	0	470	asian	59	0	1	11.8146	7.63662	10.5565	6.78136	12.1709	11.8956	12.3103	11.9355	11.357	9.59805	12.4385	12.3015	14.3255	1	11.3354	12.5483	12.3029	7.19967	11.2975	12.8168	13.8398	8.21917	9.1267	13.4793	11.1447	7.3837	16.5495	10.9278	13.5396	11.1415	13.0456	12.3939	11.3745
						TCGA-BRCA	TCGA-C8-A1HE	0	375	asian	59	0	1	12.6027	8.26209	11.032	12.8842	11.2808	11.5231	13.2887	11.2479	11.4247	9.09011	12.8353	12.8114	13.8404	1.58496	11.3476	12.1092	11.5177	8.52356	10.7406	12.2091	13.9047	8.61471	8.89785	9.5411	10.6609	7.78136	16.4728	10.8305	13.2278	11.4502	13.2735	12.1082	11.1731
						TCGA-BRCA	TCGA-C8-A26W	0	381	asian	58	0	1	11.8941	9.22159	11.1163	11.9462	11.0928	12.0417	12.5233	11.5137	12.1583	7.96578	12.5777	13.532	12.9372	2.58496	11.9697	13.0319	11.2773	8.75154	11.5362	12.4939	14.2386	8.64024	9.12928	10.3049	11.8086	7.84549	16.2348	11.4773	13.6746	12.4891	14.3589	13.5588	11.9189
						TCGA-BRCA	TCGA-C8-A26X	0	376	asian	58	0	1	13.4709	10.0821	10.1799	5.9542	9.64386	12.5708	13.0083	10.2155	11.6693	8.59619	11.7859	12.9703	12.7298	2	10.8368	11.7826	11.7237	8.90087	11.3376	11.9304	13.2488	8.47573	8.80413	9.33316	11.8506	8.87958	16.8674	10.1523	11.7797	13.074	12.9307	13.6543	11.9348
						TCGA-BRCA	TCGA-C8-A12N	0	358	asian	58	0	1	11.1202	8.84549	9.783	10.3365	10.7465	12.0668	12.9882	10.3376	11.5221	8.7039	11.7415	12.0338	11.6298	0.01	11.0694	11.7624	11.3674	7.52356	10.825	12.0144	13.1625	7.06609	8.7879	9.3443	11.3134	7.32193	15.805	9.74483	11.8186	9.97585	13.2899	12.6312	10.7557
						TCGA-BRCA	TCGA-C8-A1HN	0	394	asian	56	0	1	12.4871	10.1561	11.062	10.1812	11.3537	13.148	12.9826	12.4236	12.211	10.0993	12.6891	13.6157	12.1852	2.32193	12.3955	12.9473	13.2633	7.65105	11.8078	12.8244	14.9254	9.38586	8.90689	9.58496	12.6872	5.67243	15.3991	12.3035	13.1603	13.5489	14.1362	11.4949	11.7736
						TCGA-BRCA	TCGA-C8-A132	0	383	asian	56	0	1	10.683	8.7211	10.7202	9.81858	10.8431	12.1883	12.5718	10.567	11.0196	9.10852	12.2963	12.545	12.4385	3.70044	10.2228	12.1059	10.3354	8.83289	10.2538	11.0451	12.6499	8.75822	8.89178	10.6466	11.6221	8.9629	15.9194	9.98014	11.9575	11.4205	13.6984	11.5911	11.1718
						TCGA-BRCA	TCGA-C8-A275	0	1	asian	56	0	1	11.2294	9.20945	11.2204	9.85331	10.4471	12.6575	13.5721	11.5103	11.3767	10.8572	13.3991	13.3752	12.8192	3.16993	11.3083	11.2348	14.1741	8.30834	11.2064	12.25	13.8916	7.87652	7.89482	11.3443	12.4651	7.50779	16.203	11.0688	13.753	14.3408	15.2662	12.8809	10.8313
						TCGA-BRCA	TCGA-C8-A12V	0	385	asian	55	0	1	10.9106	9.88264	11.7004	10.4818	12.3429	11.8899	12.6959	10.9396	11.2668	7.44294	11.8341	12.2975	11.5464	3.45943	11.2167	12.0671	10.6119	9.36413	11.8178	11.395	12.3718	8.32643	6.83289	9.26444	13.4612	7.13955	15.3709	9.76653	11.8289	12.4569	12.7715	14.6375	11.5887
						TCGA-BRCA	TCGA-C8-A12P	0	358	asian	55	0	1	12.3247	9.75822	11.0014	5.52356	10.6582	11.8899	12.7636	10.207	10.7168	8.46352	12.9298	12.9396	13.1493	7.05528	12.3861	13.991	12.4184	7.84549	11.6551	11.5878	12.5889	7.89482	9.07682	9.53138	11.2726	6.45943	17.5129	9.59432	12.3473	13.0566	13.0651	12.5748	11.6193
						TCGA-BRCA	TCGA-C8-A138	0	380	asian	54	0	2	9.52943	8.66888	9.33762	7.81378	10.2082	12.0631	12.6027	9.41151	11.1485	10.875	10.3998	11.4305	11.7768	3.45943	10.7013	12.4964	11.5906	8.36194	10.3242	11.1504	11.6511	8.11374	8.97728	9.96145	11.7305	6.45943	15.7783	8.22882	11.5343	10.9643	13.671	12.438	10.1176
						TCGA-BRCA	TCGA-A2-A0CR	0	3283	asian	54	0	1	10.4818	9.75154	10.1787	9.24317	11.2808	13.0037	12.0498	9.63481	12.1926	9.47168	10.7698	11.3089	10.1849	4.45943	10.403	12.6018	11.2288	10.2854	10.3163	11.5348	11.794	9.52552	7.03342	9.76155	11.0634	7.40939	16.0409	8.72792	11.8118	10.3597	13.3053	14.0723	10.7202
						TCGA-BRCA	TCGA-AR-A1AS	0	1150	asian	54	0	1	11.2204	6.9542	9.64746	5.2854	10.9614	12.6624	12.9073	10.2009	11.2691	9.63844	12.3219	12.7805	12.535	1	11.1529	11.6913	11.3078	6.44294	9.40939	11.6843	13.5593	7.39232	6.65821	7.16993	10.3095	4.58496	16.9237	9.93664	12.713	11.1592	13.0726	11.4035	11.7069
						TCGA-BRCA	TCGA-C8-A8HQ	0	380	asian	53	0	1	10.7574	9.36632	10.8305	7.54689	11.0768	12.3912	13.3455	11.2046	11.3832	10.3977	11.9462	12.6837	12.6108	3	10.7406	12.0241	12.4091	8.64746	10.7465	12.0386	13.0706	8.25739	8.79116	9.91289	10.4717	7.2384	16.2301	10.1687	13.0678	12.5404	13.6753	13.6153	12.1293
						TCGA-BRCA	TCGA-C8-A1HK	0	366	asian	53	0	1	10.668	7.19967	8.26209	5.58496	9.42836	12.1545	12.1699	10.3443	10.8572	11.0035	12.2998	12.0098	12.9095	1.58496	10.1699	11.4979	12.7944	6.84549	10.4838	11.0701	14.0108	7.03342	7.52356	9.63844	11.989	7.45121	14.8848	11.218	12.6207	12.8017	13.7073	9.19476	10.875
						TCGA-BRCA	TCGA-C8-A1HJ	0	5	asian	53	0	1	11.1066	10.5038	10.4574	6.93074	10.9694	12.4396	14.2943	10.6248	13.0676	10.9787	13.5992	14.9206	14.6853	1	13.047	11.8715	13.5821	8.224	11.7275	14.1399	14.559	8.23362	8.86419	10.8384	12.4679	8.92481	16.8573	11.2384	12.8001	13.2038	13.936	9.54882	13.4324
						TCGA-BRCA	TCGA-C8-A130	0	370	asian	52	0	2	11.2986	10.941	10.8162	7.70044	11.1396	13.1173	12.3214	10.6564	11.2992	9.89936	12.4886	12.6941	10.7822	3.16993	11.1555	13.7955	13.2321	9.06609	10.7723	12.0641	14.1692	10.9454	9.06878	10.0888	13.2583	7.17991	16.0289	10.6996	11.4762	12.5715	13.3198	11.1059	11.2732
						TCGA-BRCA	TCGA-C8-A134	0	383	asian	52	0	1	11.8925	9.9901	12.617	9.86419	12.1092	13.3704	13.9731	11.9993	12.2568	10.2058	13.6469	14.0951	11.8811	3.90689	12.4359	14.2614	13.0936	9.31061	11.3718	12.4805	14.4415	8.95128	8.224	11.1497	13.3982	7.62205	16.589	11.9833	14.6303	13.9087	14.5677	13.3212	12.3769
						TCGA-BRCA	TCGA-C8-A12O	0	385	asian	50	0	1	11.8309	9.71253	11.4757	6.96578	11.0403	12.5003	12.9458	11.6156	10.5718	8.17991	12.3318	12.7973	13.4428	2	12.1296	12.777	12.1932	7.94251	10.9687	12.1914	13.668	7.99435	9.57554	10.5187	11.1351	7.21917	16.8219	10.7616	13.1439	11.9311	12.4401	12.6039	11.6106
						TCGA-BRCA	TCGA-C8-A1HG	0	345	asian	50	0	1	10.6996	9.35535	9.61102	4.52356	9.68475	11.2402	11.8146	10.3542	10.7977	11.1235	11.3359	11.9679	9.11634	0.01	11.3038	11.1338	12.0984	6.30378	10.5157	12.6198	13.4719	6.26679	6.39232	7.55459	11.5641	6.9542	14.707	10.2574	11.5925	11.1812	13.571	10.7756	10.2119
						TCGA-BRCA	TCGA-C8-A8HR	0	408	asian	49	0	2	10.8657	9.24793	11.1948	10.0914	10.9491	11.6152	12.2225	10.7313	10.9607	9.32867	11.7215	12.0338	11.4853	1	11.7104	12.188	11.1536	10.7448	11.1202	11.1111	12.577	10.1228	9.03617	11.1434	11.9222	8.60363	14.9534	10.1687	12.0961	10.6439	12.275	12.8901	11.0244
						TCGA-BRCA	TCGA-C8-A12W	0	385	asian	49	0	2	10.8948	8.84862	10.3761	9.47978	10.4294	12.8017	13.3987	10.4656	10.0014	9.13955	12.3432	12.4038	11.7026	2.58496	10.4357	12.3379	12.0644	7.78136	10.043	12.1163	13.8395	7.67948	8.79442	9.56986	10.7474	5.97728	15.773	11.0654	12.4546	11.4737	12.7121	12.6609	10.7846
						TCGA-BRCA	TCGA-JL-A3YW	0	360	asian	49	0	1	11.6715	10.567	11.0355	7.01123	11.6366	12.8613	12.4236	10.0954	11.6138	9.60363	12.3069	12.5915	13.2857	1.58496	11.2143	12.8609	11.5479	9.05257	10.8463	12.0721	12.8396	9.12153	9.13443	8.76818	11.5512	7.33985	16.7692	10.1624	11.9636	12.3078	13.717	14.1328	11.411
						TCGA-BRCA	TCGA-EW-A1IX	0	1208	asian	48	0	1	11.4025	7.85798	10.9039	9.29002	11.2709	12.0617	12.3748	10.2854	10.5708	7.33985	11.8823	11.8525	12.3154	3	10.3185	12.2204	10.4041	9.01959	10.1836	11.3371	12.6032	9.16993	9.48583	10.0182	10.9986	7.5157	15.9027	9.64024	11.9148	9.12153	12.1957	11.7237	10.8626
						TCGA-BRCA	TCGA-C8-A27A	0	747	asian	48	0	1	12.4818	9.74819	12.3197	6.96578	11.6546	12.8045	13.1721	12.7013	12.1325	10.8711	13.1093	13.2809	15.0922	1.58496	12.5882	13.0047	13.0939	7.3837	12.1948	12.6168	14.7978	8.12928	10.4388	10.988	10.9873	8.66888	16.0073	12.3149	13.2723	13.6833	14.6391	11.3214	11.9103
						TCGA-BRCA	TCGA-C8-A27B	0	439	asian	48	0	1	12.9366	9.20457	12.3137	11.7398	11.7682	11.8412	13.8649	11.5579	11.2021	7.96	13.5951	13.9125	12.3982	2.32193	13.1553	11.5078	11.8301	8.59246	12.2467	13.0831	13.9783	6.20945	7.32193	8.8009	11.5241	5.97728	16.5312	11.3767	13.4731	13.4578	13.4198	13.6813	13.4375
						TCGA-BRCA	TCGA-C8-A1HF	0	332	asian	48	0	1	12.4165	9.11634	10.8384	7.01123	10.611	12.6876	12.6985	11.9611	12.1932	11.286	12.0345	13.3022	13.2913	2	11.9723	11.4645	13.5889	8.46761	11.3191	12.9733	15.0379	7.76155	8.42626	9.8392	12.0116	7.32193	16.2841	11.2871	13.9711	13.6462	14.9169	13.317	11.6917
						TCGA-BRCA	TCGA-C8-A26V	0	616	asian	47	0	2	12.1762	8.70736	11.3734	5.67243	11.9851	12.4019	13.859	11.375	11.7377	10.352	13.0674	13.5778	13.4094	1.58496	11.7532	12.0583	12.3479	7.88264	11.7842	12.4445	14.484	7.56224	8.71425	10.0593	11.2715	8.51175	17.5714	11.6533	13.7445	12.8591	14.1211	13.1847	10.9715
						TCGA-BRCA	TCGA-C8-A12U	0	385	asian	46	0	1	10.9993	9.43671	9.6865	10.7228	9.21432	13.6083	13.8585	11.1235	11.4793	11.1966	13.8555	12.3202	14.0935	0.01	11.1176	12.6755	13.5098	7.42626	10.3004	12.3958	13.8228	6.74147	6.71425	8.12412	12.2	5.97728	16.0552	10.6733	12.4783	13.5201	14.0797	13.6749	10.4919
						TCGA-BRCA	TCGA-JL-A3YX	0	352	asian	46	0	1	11.9582	9.09803	11.03	8.64024	11.2732	13.0524	12.7588	10.2479	12.0478	10.5859	12.4192	12.4367	13.7285	2.32193	11.9118	13.041	12.85	9.0607	11.1421	12.1889	13.8461	8.52356	7.66534	11.8884	11.7444	7.96	16.67	10.8439	13.1372	11.9366	13.751	12.0265	12.1849
						TCGA-BRCA	TCGA-C8-A12Z	0	382	asian	45	0	1	12.0475	8.36194	9.61839	12.3526	10.1523	11.5957	12.8323	10.8265	10.4315	9.33985	12.8543	12.9929	13.3127	1	10.5488	12.6981	12.0808	6.85798	9.66	11.2384	13.5263	6.74147	7.5157	8.19967	10.2981	5.20945	16.4768	10.5028	12.8798	12.6357	13.679	11.8435	12.3306
						TCGA-BRCA	TCGA-C8-A12Y	0	1476	asian	44	0	1	11.4289	10.6751	10.611	7.52356	11.1267	12.8337	13.7488	10.5088	12.1173	10.7228	12.1926	11.8792	11.9058	2.32193	12.0691	12.7899	12.9163	8.62936	12.0924	12.7816	13.5712	8.84235	7.53138	10.3531	10.6856	8.03892	16.1237	10.1383	12.8059	10.611	14.6004	13.8094	12.286
						TCGA-BRCA	TCGA-C8-A12T	0	0.5	asian	43	0	1	11.0641	7.93074	10.314	5.75489	10.1984	12.2021	11.9908	10.3912	10.8478	9.27845	12.0098	12.5725	12.8927	1.58496	11.2015	12.6101	13.6638	7.62205	9.97871	11.3276	13.6001	7.33985	7.99435	9.41996	10.8865	7.31288	16.709	10.1472	12.8942	12.4939	13.5278	12.3608	10.9737
						TCGA-BRCA	TCGA-A2-A0CV	0	3011	asian	41	0	1	12.1341	8.49185	11.4954	8.89785	11.332	12.2923	12.4934	10.42	11.2342	10.6193	12.2128	12.9645	11.3837	2.32193	11.2101	12.816	10.9181	9.38154	12.4168	11.5265	12.527	9.57365	9.15228	10.3945	12.2738	9.11634	15.5835	9.55075	12.7239	7.66534	13.9327	12.4878	11.7104
						TCGA-BRCA	TCGA-C8-A1HI	0	343	asian	40	0	2	12.3052	8.21917	10.137	9.57365	10.7838	12.6198	13.1559	10.6961	11.5023	10.4273	12.0458	13.0502	14.1547	2.80735	12.0597	12.5943	14.499	7.90689	11.2276	11.6284	13.7149	8.82972	8.75489	10.3576	11.7198	8.21432	16.5162	10.7279	13.3129	11.875	14.071	11.9315	11.8041
						TCGA-BRCA	TCGA-AC-A2FF	0	2759	asian	40	0	1	12.4179	9.10852	11.9118	9.85331	11.1599	11.6729	12.4742	10.9425	10.8986	8.58871	12.5343	12.5132	11.84	3.45943	10.5372	11.8622	11.6239	10.8202	10.8834	11.9289	13.3378	11.6055	10.9844	12.2164	11.3945	10.196	15.8854	10.6448	12.6733	10.6777	12.6746	11.0741	11.7266
						TCGA-BRCA	TCGA-AO-A126	0	3307	asian	39	0	1	9.9263	9.00562	9.62022	10.5632	11.1209	12.1427	12.9908	9.77972	11.7632	10.8611	11.2033	12.031	12.2533	0.01	10.9737	12.3197	11.2538	9.21189	10.5981	12.0283	12.8374	9.27845	9.98014	11.4142	11.6891	8.08215	15.1624	8.73809	12.3166	9.38586	14.0199	12.2146	11.8372
						TCGA-BRCA	TCGA-C8-A1HL	0	317	asian	38	0	2	10.5147	8.16993	9.50978	8.00562	9.26913	12.741	12.7099	10.4294	11.2779	10.1306	11.3365	11.9614	12.8313	2.80735	11.1383	12.4883	11.0941	9.15228	10.3998	11.9968	12.9873	8.68299	9.76984	11.1072	10.1687	7.35755	16.0155	9.40088	12.5377	13.196	14.1502	10.9174	11.1472
						TCGA-BRCA	TCGA-EW-A1IY	0	258	asian	38	0	1	12.0931	9.81538	11.0881	7.2854	10.1724	10.6129	13.3089	11.9676	11.823	10.3565	12.4717	13.2157	12.7995	3.16993	12.2167	12.2697	10.9054	7.27612	12.5798	11.741	13.9544	8.04985	10.0417	11.7711	12.3329	9.22159	15.3691	11.3382	13.2402	13.3176	14.523	10.9851	11.5746
						TCGA-BRCA	TCGA-AO-A03L	0	2442	asian	34	0	2	10.4419	8.35315	10.4949	10.9723	10.2527	12.4966	13.2688	11.3032	11.0485	9.22159	11.7989	13.3176	13.324	3.90689	11.0888	12.1963	12.9084	8.42206	11.196	12.007	13.9086	8.34873	8.62936	10.5098	11.1573	7.85798	16.4011	10.8273	13.6056	13.3663	13.6028	13.7903	11.3185
						TCGA-BRCA	TCGA-C8-A1HO	0	375	asian	34	0	2	11.8967	8.30378	10.8688	12.3284	11.0049	12.6421	12.9908	11.9607	11.4803	10.4828	12.4255	12.3644	14.1931	2.58496	11.7944	11.722	12.5471	7.74819	11.6161	11.6613	14.6803	8.01123	8.65105	10.6978	11.6702	7.55459	15.1936	11.9766	12.8351	12.2079	13.6439	11.5868	11.2432
						TCGA-BRCA	TCGA-E2-A106	0	2541	asian	34	0	1	10.4346	7.29462	10.8895	8.43879	10.6564	13.2574	12.6015	9.61471	10.9887	9.25267	11.9005	12.2805	15.3846	1	11.1636	13.0989	12.0119	8.84549	9.87805	11.7773	12.6629	8.90689	8.0607	9.36194	11.0049	6.67243	16.7261	9.97154	12.1376	9.87652	12.9001	12.1186	11.3163
						TCGA-BRCA	TCGA-C8-A137	0	379	asian	34	0	1	10.9965	8.01681	9.37938	5.72792	10.3902	11.4939	12.8924	10.3641	10.4471	10.3026	11.6755	12.9869	12.4286	3.16993	9.91439	11.9436	10.952	7.70736	10.0688	11.6484	13.8942	6.55459	8.3837	9.33092	11.9307	6.56986	16.4817	10.4512	12.8523	13.2012	14.4245	10.2228	11.5718
						TCGA-BRCA	TCGA-C8-A273	0	513	asian	29	0	1	11.4226	9.03067	11.0519	7.25739	10.9248	13.1378	13.0521	10.5546	11.2802	12.614	12.2811	12.6644	11.8769	1	11.1523	14.8016	12.8212	8.55842	11.6096	12.0255	13.8293	8.13955	8.81378	9.82177	11.3886	6.94251	16.0069	11.1273	12.8404	12.4546	13.657	13.1616	12.0573
						TCGA-BRCA	TCGA-E2-A1LK	1	266	black or african american	84	0	2	9.7039	7.01123	12.099	5.52356	11.1605	11.9982	11.5137	9.71768	10.6083	8.19476	12.6664	12.0861	10.7797	0.01	10.783	11.4003	12.0798	7.9542	10.4929	12.9674	13.2553	6.10852	7.40088	7.42626	12.3351	3	15.8624	9.86882	10.3945	10.6466	13.0493	13.2113	11.8037
						TCGA-BRCA	TCGA-E2-A2P5	1	821	black or african american	78	0	2	11.0168	8.67948	9.92481	6.18982	11.0084	13.4426	12.8682	10.268	10.7977	10.6448	12.6087	12.633	11.462	1	11.9189	12.3106	11.851	8.11374	10.2738	12.1586	13.8467	8.56224	8.47168	9.81698	11.8013	7.93664	15.2997	10.7773	12.4909	10.1383	14.4988	11.4954	11.7731
						TCGA-BRCA	TCGA-BH-A1FC	1	3472	black or african american	78	0	1	11.6004	9.77643	12.3075	5.04439	11.3004	11.9318	12.9832	11.7756	11.6622	7.90087	13.871	13.7404	13.2108	2.58496	12.1951	12.7252	13.0605	7.55459	11.0607	13.1098	14.6004	6.9542	7.39232	9.21675	13.4648	6.33985	15.1058	12.6506	13.032	13.3526	15.2753	12.9084	14.3014
						TCGA-BRCA	TCGA-BH-A209	1	3959	black or african american	77	0	1	11.7928	10.3376	11.7228	6.84549	11.3202	11.8653	14.4805	11.5755	11.3929	6.53916	13.2534	13.6542	12.5043	4.45943	11.5957	12.7758	13.2672	8.99152	12.1984	12.8108	14.6691	8.62936	7.86419	8.65105	12.6472	7.81378	16.0129	11.4903	13.7657	12.0751	13.6989	12.4265	14.3929
						TCGA-BRCA	TCGA-B6-A0IM	1	3873	black or african american	75	0	1	11.4671	8.64746	12.2894	10.1383	11.5517	10.2819	12.7463	11.6768	10.4083	7.96	12.4476	12.6935	12.7093	1.58496	12.3759	13.5908	11.4605	9.32193	11.3151	11.6257	13.568	8.76818	9.43045	11.6644	11.8082	7.56986	16.8888	10.9908	13.2058	11.7402	13.1762	11.8584	12.0056
						TCGA-BRCA	TCGA-BH-A42T	1	320	black or african american	75	0	1	11.0828	10.9556	11.7969	9.75154	12.4468	12.2808	13.4214	10.7262	11.9535	8.55075	12.5594	13.1044	12.0272	2	11.2586	12.3861	13.5855	9.64386	10.2408	12.5812	13.7945	8.90388	7.42626	8.75489	10.611	6.53916	16.1309	10.7723	12.3044	12.128	13.2267	13.1206	12.454
						TCGA-BRCA	TCGA-B6-A0I1	1	2361	black or african american	73	0	1	10.8353	11.0389	11.7	5.45943	12.1147	13.3799	12.9149	10.2715	11.1215	11.6211	13.3667	13.2359	12.3089	7.20945	13.0175	13.356	13.3855	7.33092	11.2161	12.3731	14.1957	6.83289	8.8857	7.82655	12.9947	5.42626	16.765	11.1548	12.6161	11.0546	15.3603	11.8723	14.2552
						TCGA-BRCA	TCGA-OL-A5D6	1	1104	black or african american	71	0	1	12.0224	8.80413	10.2228	7.09803	10.9979	12.0795	12.1674	9.61102	11.0815	9.74483	11.7241	12.1833	10.769	3.32193	8.83605	11.941	11.3918	9.10329	9.3837	11.0471	12.8031	9.2384	8.85487	9.18982	11.8202	8.11894	15.3326	9.47573	10.7448	11.2101	13.2327	12.762	11.0795
						TCGA-BRCA	TCGA-AO-A03O	1	2483	black or african american	69	0	1	11.6339	8.11894	9.96145	7.32193	10.7465	11.128	12.6907	11.3112	10.1948	8.09276	12.7132	13.1357	12.5113	4.32193	11.4645	11.5142	10.8811	7.60733	11.0417	11.6777	13.7152	6.93074	6.91886	7.42626	11.6179	6.59991	16.4	11.4635	12.6757	11.5887	12.4086	12.4863	11.8482
						TCGA-BRCA	TCGA-UU-A93S	1	116	black or african american	63	0	2	8.16491	8.35315	10.0566	3.32193	10.2889	12.2234	12.9569	9.62205	11.5656	9.4818	10.9001	12.277	11.7903	2.58496	9.81218	11.1402	11.1737	7.26679	11.2796	12.7557	12.4656	6.52356	6.08746	8.19476	11.0674	5.9542	15.6227	8.58496	11.4702	10.9285	13.0175	13.1759	12.0831
						TCGA-BRCA	TCGA-A2-A3XS	1	1032	black or african american	62	0	2	11.6537	9.73978	11.7406	7.67948	12.0217	12.6662	11.4558	10.7781	12.2095	11.0049	12.3902	12.9672	11.3443	3.16993	10.9929	12.9739	12.3485	9.50383	11.1183	13.0201	13.1217	8.633	8.49586	9.46148	13.4766	7.12928	15.7152	10.4949	12.1954	12.6237	13.3295	12.7391	12.6113
						TCGA-BRCA	TCGA-B6-A0X5	1	2097	black or african american	61	0	1	6.64386	5.12928	11.128	12.3567	9.88264	12.0451	12.9211	11.4257	10.3641	11.158	11.7339	12.2773	11.883	2	11.1261	12.6889	11.117	6.74147	11.1331	11.6948	13.7353	7.76155	6.85798	11.1235	7.21917	7.09803	16.0924	10.5934	13.6044	12.7474	13.6354	10.7632	10.9851
						TCGA-BRCA	TCGA-B6-A0RL	1	2469	black or african american	60	0	1	11.8074	8.66178	11.9218	7.36632	12.1443	12.1693	12.8343	11.3907	11.9947	7.67243	12.3089	13.1039	13.6085	1	12.3457	12.3078	11.8166	5.67243	11.1605	11.7099	13.8724	6	3.16993	15.3828	10.8895	7.20945	15.5797	11.2837	13.3012	12.3498	13.8445	10.242	11.8498
						TCGA-BRCA	TCGA-AC-A62V	1	348	black or african american	58	1	2	10.2155	8.5157	10.3219	10.6147	10.585	12.5194	12.1383	9.89482	11.7026	8.61471	11.2992	11.576	12.4035	3	11.5953	12.8457	12.9246	9.27146	11.0334	11.7764	12.2946	8.12412	6.02237	7.73471	10.2515	5.80735	16.1713	9.47371	12.7153	11.6389	13.0284	14.2469	11.1712
						TCGA-BRCA	TCGA-LL-A73Z	1	227	black or african american	55	0	2	11.5575	9.68825	10.7448	9.14211	10.8903	12.1898	12.157	10.0901	11.1923	9.7879	11.545	11.7678	10.9651	4.24793	10.4336	12.3731	10.7398	9.70044	11.0761	11.556	12.0808	9.81858	7.93074	10.268	11.4883	8.67596	15.3245	9.23601	11.8463	11.357	13.8001	13.2531	11.6161
						TCGA-BRCA	TCGA-AO-A03P	1	2911	black or african american	54	0	1	11.4247	9.18735	10.5038	5.64386	10.3718	12.8713	13.2915	11.0056	11.3123	9.47168	12.1706	12.6239	12.6195	4.85798	11.7402	12.1874	13.1858	8.78136	10.4808	12.3281	14.1725	8.30834	9.03342	10.6733	11.9762	7.30378	15.821	11.3432	12.8954	11.2131	14.1189	11.0546	11.3376
						TCGA-BRCA	TCGA-B6-A0RH	1	6456	black or african american	51	0	1	10.9001	10.5127	10.2946	9.62571	10.8001	12.9324	12.2231	9.35975	11.9458	11.7997	12.1415	12.9291	12.1144	0.01	11.4993	12.4991	13.0553	8.29002	12.4543	12.1699	13.1707	7.62936	8.91886	9.14975	11.9855	8.37938	17.0758	9.38586	12.8531	12.3046	14.906	13.6627	12.3437
						TCGA-BRCA	TCGA-B6-A3ZX	1	1152	black or african american	50	0	2	11.2095	10.8556	11.8803	8.86419	12.062	12.6468	12.2825	11.4398	12.0512	8.89178	12.2571	12.2799	11.6821	4.64386	10.9622	12.3385	11.4184	8.80735	11.3783	12.1408	13.0251	8.97728	8.48382	10.5962	12.4821	8.28077	15.633	10.3531	12.4398	12.403	13.2351	13.1636	12.4502
						TCGA-BRCA	TCGA-A2-A3XX	1	1439	black or african american	49	0	1	11.4666	9.84706	11.1111	10.1163	12.4592	13.4695	12.6595	10.3365	11.7207	10.4878	13.2858	12.1344	11.8202	3.45943	11.813	13.3035	12.474	10.5727	10.792	11.9399	13.2368	8.33985	7.46761	8.56224	12.9894	6.98868	15.951	10.7649	12.0095	11.7457	13.4724	12.6922	13.0336
						TCGA-BRCA	TCGA-A2-A3XY	1	1093	black or african american	49	0	1	10.7381	10.3772	12.1777	10.2621	12.8455	13.6104	12.8435	10.9425	11.9054	10.4315	12.9578	12.2116	12.7551	4.85798	10.8634	12.8786	11.8017	11.0721	11.0748	12.1926	13.6025	10.1344	8.91588	10.4157	13.5479	8.10852	16.8677	10.8001	12.1589	11.7296	13.0058	14.2095	12.6506
						TCGA-BRCA	TCGA-B6-A0I6	1	991	black or african american	49	0	1	11.3208	8.5157	10.6978	8.44294	11.4393	12.4019	11.7343	11.0007	11.352	9.95855	11.9986	13.2158	12.5798	1	11.5147	11.4848	10.7566	8.52356	10.4737	12.5041	13.8361	7.15987	8.74819	9.84078	12.7752	5.75489	16.1739	11.1599	12.9451	10.9069	13.2196	11.4712	11.6064
						TCGA-BRCA	TCGA-B6-A409	1	573	black or african american	44	0	2	10.5536	9.27845	10.7682	8.02237	12.6843	14.0351	13.1643	10.6239	12.4587	12.0888	12.6515	11.9506	11.0627	0.01	10.9643	14.3371	12.7202	10.403	10.6944	13.0904	13.6718	8.224	7.11894	9.01959	11.8174	6.61471	15.8215	10.8424	11.5445	11.2076	14.5089	13.8821	13.0866
						TCGA-BRCA	TCGA-B6-A0WX	1	639	black or african american	40	0	2	10.933	10.0168	10.4136	8.53138	11.0451	12.7011	12.8607	10.1472	12.1141	9.60548	12.0566	12.723	10.5196	3.32193	11.1536	12.5594	12.0895	7.97154	10.988	11.7566	12.758	8.12928	8.9629	10.865	12.8158	8.29462	14.8408	9.93221	11.6537	10.9766	12.9542	11.4919	12.6108
						TCGA-BRCA	TCGA-A2-A0CM	1	754	black or african american	40	0	1	11.5546	9.55459	10.9432	6.02237	11.6733	12.1702	12.4911	11.021	11.1118	6.37504	12.8265	12.2983	11.3168	3.16993	11.7582	11.8807	11.7453	7.32193	10.8154	12.7058	13.5375	7.15987	8.43463	8.75154	11.6078	5.49185	15.7061	11.1849	12.1376	12.4556	13.5338	12.4752	12.329
						TCGA-BRCA	TCGA-B6-A0IE	1	1993	black or african american	38	0	2	10.9972	8	10.0661	9.22641	10.8887	13.849	13.1445	10.0993	11.8876	9.20212	11.0272	12.4163	11.92	1.58496	11.9174	12.8297	13.5325	8.88874	11.2767	12.7524	14.5416	9.13443	7.45943	10.703	11.5507	8.66888	16.1912	11.0334	11.4099	11.0855	15.1484	12.0133	12.775
						TCGA-BRCA	TCGA-A2-A04P	1	548	black or african american	36	0	2	10.255	9.33316	9.61471	7.41785	11.0471	12.9663	12.2915	9.46148	11.823	7.35755	10.3129	12.5957	11.3032	1.58496	11.9787	12.0674	12.2503	8.49185	10.3354	12.5319	13.7616	8.45121	9.02791	11.3685	11.7009	7.15987	14.8555	9.74651	10.8392	11.2408	13.42	11.7944	11.9263
						TCGA-BRCA	TCGA-A2-A3XU	1	912	black or african american	35	0	1	11.8388	9.01681	10.2866	5.39232	11.1202	14.4177	12.8698	9.37287	12.6682	8.09803	12.8378	12.5159	12.0471	6.84549	11.9848	12.6613	13.8175	8.99152	10.7125	12.5003	14.023	6.08746	7.5157	8.21917	11.5953	4.90689	15.6946	10.9359	12.9063	11.66	15.1336	12.9451	13.0353
						TCGA-BRCA	TCGA-E2-A9RU	0	538	black or african american	90	0	2	9.67772	8.26679	9.45943	5.61471	10.3332	12.5413	12.1677	8.86728	11.0947	8.66178	11.7056	11.905	12.4075	3.58496	10.1762	12.5353	12.5943	6.12928	10.3465	11.5784	12.6405	6.52356	6.06609	6.80735	9.47168	5.12928	15.7926	9.24793	11.5579	10.7194	13.8735	12.144	11.1459
						TCGA-BRCA	TCGA-E2-A15O	0	1545	black or african american	89	0	1	11.611	7.66534	10.8455	8.47168	10.3083	11.4435	12.4289	10.9607	11.2615	9.36413	12.2816	11.2773	11.7309	3.45943	11.3292	12.1787	10.7541	7.76155	10.1357	12.0133	13.6972	7.46761	6.42626	12.5861	10.9121	5.85798	15.0933	11.2883	12.4453	10.5689	12.3756	10.8948	10.4717
						TCGA-BRCA	TCGA-LL-A5YM	0	466	black or african american	88	0	2	6.93074	10.4041	10.0607	8.53138	10.6528	14.3081	12.9129	8.38802	11.5836	7.6865	10.9586	11.3044	11.8333	0.01	10.2095	12.6631	14.1666	9.94398	10.6312	12.4587	12.8267	8.77479	5.93074	6.16993	8.55459	4.9542	16.1187	8.86419	11.3966	11.8903	12.9816	12.991	11.6262
						TCGA-BRCA	TCGA-A7-A56D	0	448	black or african american	84	0	1	7.75489	9.08215	8.27146	6.87036	11.2143	13.8049	12.0765	6.6865	11.544	9.09803	10.4429	10.9922	10.6284	2.32193	9.94983	12.87	11.9381	7.39232	8.95128	11.411	10.774	6.75489	6.67243	5.9542	9.77479	4.70044	16.167	6.83289	9.86419	9.90689	13.5948	12.8609	10.2784
						TCGA-BRCA	TCGA-S3-AA12	0	574	black or african american	82	0	2	11.4808	7.11894	10.1267	10.6284	11.0701	11.8037	12.9678	10.796	10.7715	8.07682	11.4486	11.5661	13.0891	0.01	11.0417	12.3418	11.4003	6.76818	9.74483	11.2709	13.0903	7	5.61471	11.3049	11.1762	5.35755	14.8194	9.94691	12.0109	9.64386	11.6939	11.1066	11.0224
						TCGA-BRCA	TCGA-BH-A42U	0	3364	black or african american	80	0	1	11.2767	9.7364	11.1586	11.4522	11.6917	13.4629	12.378	9.72281	12.0025	10.7039	11.7436	11.7266	10.9454	2.80735	10.8963	12.58	11.7237	11.4471	10.3597	11.7215	12.3753	10.5226	8.62205	10.4471	11.6119	7.93074	15.9692	9.43045	11.794	9.34873	13.2821	13.1129	11.5488
						TCGA-BRCA	TCGA-AC-A2BK	0	2222	black or african american	78	0	2	11.5999	9.14211	12.0908	8.49185	12.0735	11.2674	12.6495	11.6303	11.3359	10.137	13.0708	13.2525	13.1502	4.58496	11.151	12.3501	11.9241	8.12412	11.5182	12.0536	14.295	6.18982	11.062	10.2738	12.6678	4.80735	15.5496	12.0904	12.7497	13.3419	14.2145	10.7822	14.117
						TCGA-BRCA	TCGA-LL-A6FQ	0	80	black or african american	77	0	2	10.6184	9.31288	9.12928	6.26679	10.6795	13.6788	12.5821	8.54303	12.0154	9.33092	10.9381	11.0512	10.0224	0.01	10.6366	13.1903	12.4969	7.94251	9.80896	12.178	12.3261	7.53916	5.52356	6.94251	9.62022	5.93074	16.4335	8.75822	11.286	10.3652	13.2564	14.4117	10.3129
						TCGA-BRCA	TCGA-AC-A5EH	0	511	black or african american	76	0	1	12.1917	9.72792	11.446	7.02237	10.8925	12.2494	13.0758	10.5812	10.599	10.3354	12.4538	12.4512	13.026	1	11.2216	13.1359	11.4252	8.09803	10.2432	11.4362	11.6537	7.88874	8.55459	7.8009	10.8819	6.53916	16.7752	8.96578	11.4964	11.4944	13.5616	14.1625	11.4507
						TCGA-BRCA	TCGA-V7-A7HQ	0	2033	black or african american	75	0	2	9.59246	8.32643	8.10852	7.37504	10.5546	13.4445	12.9376	6.84549	11.9407	9.98299	10.5118	10.3432	9.62205	4.16993	9.83763	12.1984	12.5331	7.97154	9.3966	11.1254	11.5948	6.74147	6.2854	9.52552	9.76487	6.02237	15.6669	8.46761	11.0314	8.37069	13.2658	12.2279	9.64024
						TCGA-BRCA	TCGA-OL-A66P	0	428	black or african american	75	0	1	11.2732	10.3387	10.0888	5.61471	10.4073	12.4522	12.3796	8.87652	11.5122	9.11634	10.4868	11.623	11.1599	4.16993	9.55459	11.2866	11.2064	8.50383	9.66	11.2521	11.5103	8.57743	7.06609	7.2384	11.1415	7.27612	15.6237	7.71425	10.7406	11.1261	12.7467	14.5658	10.7125
						TCGA-BRCA	TCGA-E2-A1LL	0	1309	black or african american	74	0	2	10.0375	10.1447	10.7781	7.15987	11.4691	12.4861	12.4213	10.0835	11.4014	10.0928	11.5826	12.3877	12.3526	5.58496	11.4742	11.2703	11.3157	8.50383	10.3264	11.4481	13.4288	8.64746	7.35755	8.66178	10.5068	7.16993	17.6743	10.5177	11.9166	13.1071	14.9174	12.4236	11.3939
						TCGA-BRCA	TCGA-OL-A66H	0	812	black or african american	74	0	1	11.9348	9.46964	11.4003	6.58496	11.6008	13.1227	12.5955	10.6573	11.3471	9.08746	12.0362	11.8329	13.334	1.58496	11.4115	13.3142	11.7682	8.94544	11.544	11.3298	13.2392	8.67596	7.75489	9.13699	9.72622	7.14975	15.2796	9.88417	11.8553	10.6839	13.1536	14.1016	11.0987
						TCGA-BRCA	TCGA-AC-A5XU	0	455	black or african american	74	0	1	10.1137	9.0954	10.9174	6.14975	11.4984	12.5428	12.9026	10.8146	12.1482	9.92778	12.1049	11.8158	12.5462	2	11.8289	12.3995	11.6303	8.9629	10.7532	10.9929	13.2766	8.47168	8.41785	9.21189	10.0362	6.97728	15.3882	11.128	11.8404	11.4635	13.4416	11.5807	11.9151
						TCGA-BRCA	TCGA-UL-AAZ6	0	518	black or african american	73	0	1	10.4115	9.61839	9.07682	8.10329	10.8978	13.9884	12.6738	11.2396	12.4966	9.04985	11.7258	12.3134	14.2504	5.83289	11.2444	12.2164	11.896	7.77479	11.0168	12.1702	12.9048	8.52748	6.71425	7.43463	9.63118	6.70044	16.4437	9.74147	11.6289	12.0871	14.3479	12.6218	11.9578
						TCGA-BRCA	TCGA-AC-A6IW	0	413	black or african american	73	0	1	11.4404	10.4429	12.0654	6.79442	13.2577	11.7867	12.6965	10.7903	11.9844	6.72792	13.7778	13.4394	11.7168	4.16993	11.4136	13.5632	12.4512	8.31741	11.5915	12.9348	13.4423	7.89482	6.78136	8.37069	13.2093	6.24793	15.9151	10.4019	12.4663	12.6373	14.1103	15.4919	13.8116
						TCGA-BRCA	TCGA-LD-A9QF	0	323	black or african american	73	0	1	11.158	9.59432	11.5103	8.60363	11.1026	11.9535	11.8182	10.0251	10.8842	9.20457	11.6064	11.204	12.8465	5.42626	10.236	12.2524	11.4325	9.35094	10.544	11.1523	12.2198	9.91588	8.91289	9.15482	10.6715	7.80735	15.7511	9.30606	11.4404	11.0286	12.8929	14.2338	10.7022
						TCGA-BRCA	TCGA-E2-A572	0	1208	black or african american	72	0	2	9.74315	8.43463	9.42206	7.97728	11.3454	13.1843	12.9097	8.36194	12.0798	9.18488	10.6294	10.8049	9.35094	1	10.4778	11.6041	12.7756	7.8009	10.2372	11.585	11.8126	8.21432	5.75489	6.82018	9.76984	5.88264	15.2617	8.41363	11.6715	8.65464	13.5889	13.1206	11.2784
						TCGA-BRCA	TCGA-AO-A125	0	3456	black or african american	72	0	1	9.99152	7.71425	9.59805	5.20945	10.7814	11.8309	13.2951	9.60177	11.6729	11.1389	11.7147	11.8937	12.4622	1	11.5241	12.1818	11.8045	8.33985	11.6974	12.0627	13.3676	7.65105	8.3443	8.84549	9.8857	7.44294	15.6177	9.33539	12.0654	10.2668	13.4895	11.1491	11.3886
						TCGA-BRCA	TCGA-AC-A8OP	0	614	black or african american	72	0	1	10.7065	7.63662	10.7065	11.4486	10.5507	10.8517	11.9715	10.4242	9.99435	8.04439	10.7048	11.3821	12.0546	1	10.6046	11.8467	11.2802	9.47573	10.5275	10.8711	12.407	9.20945	8.17991	9.57175	12.0067	7.29462	14.6186	10.2597	11.4435	10.4778	11.7091	12.5817	11.3032
						TCGA-BRCA	TCGA-AC-A62X	0	417	black or african american	72	0	1	11.1059	8.96578	10.3387	5.78136	11.6689	12.2624	11.525	10.6239	11.4833	11.9936	12.3701	13.4248	11.6124	5.64386	11.4676	12.695	12.1134	8.88874	12.3794	12.3021	13.4259	7.27612	7.24793	7.54689	12.0795	7.62936	15.1625	10.9972	12.7566	11.0327	14.3715	11.825	12.4643
						TCGA-BRCA	TCGA-AC-A8OQ	0	34	black or african american	72	0	1	10.8321	9.83289	11.6013	8.87036	11.1655	11.6421	12.1759	9.84078	10.6546	8.56605	11.9248	11.9687	11.2088	2.58496	9.09803	12.9576	11.4189	10.2503	9.71768	12.1602	13.1704	9.16742	8.2384	9.23122	10.9366	6.42626	15.9297	10.8194	11.4988	10.8065	11.9263	12.9418	11.5474
						TCGA-BRCA	TCGA-BH-A0BW	0	2371	black or african american	71	0	1	12.2107	9.63844	12.7254	7.25739	11.7082	11.823	12.9202	12.0021	10.9476	8.61839	12.1049	12.8386	11.6348	4.32193	11.2556	9.08746	10.3848	9.21189	12.3276	12.3729	13.5631	6.72792	7.82655	10.1523	12.0593	7.74147	16.0652	11.1849	13.1512	12.4911	13.0018	13.3919	11.4984
						TCGA-BRCA	TCGA-OL-A66L	0	1301	black or african american	71	0	1	10.7524	9.49785	9.53333	9.60733	10.9578	13.1451	12.7271	8.51175	11.8142	9.67243	11.2222	11.1	10.7296	4.24793	10.3729	12.7729	12.5885	10.8431	10.8392	11.6604	11.9421	9.99718	6.35755	8.29921	9.85643	7.19967	16.5716	8.90388	11.3465	8.99718	13.2565	13.5859	10.8603
						TCGA-BRCA	TCGA-S3-A6ZG	0	562	black or african american	71	0	1	12.059	8.58496	10.9241	8.42206	10.9986	11.4732	12.8861	11.557	11.168	9.34207	11.3652	12.2279	12.7698	3.45943	10.9708	12.3401	10.9278	7.61471	11.989	11.5807	13.6308	8.10329	8.05528	11.0647	11.3826	7.22882	15.4944	10.9388	12.8519	11.5684	12.9699	12.4115	11.8226
						TCGA-BRCA	TCGA-EW-A1PB	0	608	black or african american	70	0	2	11.6452	11.8638	13.4721	7.32193	12.5016	14.2086	13.3239	11.0546	12.3371	8.60733	13.0234	13.1592	12.8803	3.80735	11.9672	12.8007	12.3061	7.06609	12.8244	12.7536	14.0251	6.44294	12.4226	6.24793	12.2805	7.03342	16.312	11.0028	12.9732	12.6241	13.5932	14.8724	12.7307
						TCGA-BRCA	TCGA-OL-A5D7	0	1780	black or african american	70	0	1	9.59805	10.5488	11.8688	5.93074	11.431	12.7364	12.792	10.1176	11.3696	5.32193	12.341	12.0182	11.4289	2.32193	10.9672	13.6724	12.6362	8.53138	10.4502	13.9622	13.8205	7.39232	4.85798	6.89482	12.9213	4.9542	15.3175	10.314	11.9862	11.749	13.9612	14.1696	13.0659
						TCGA-BRCA	TCGA-A2-A259	0	1596	black or african american	70	0	1	12.3977	8.66888	11.6847	10.3955	11.5137	11.8388	12.9764	10.8114	11.3202	8.79766	12.7647	12.8305	13.249	2.80735	11.4414	12.0035	12.1991	9.33539	11.2831	11.6786	14.0799	9.2503	10.2656	12.1319	11.6106	9.10591	15.704	11.6179	12.3393	9.67772	13.2751	11.8588	12.1652
						TCGA-BRCA	TCGA-LL-A7T0	0	376	black or african american	70	0	1	10.851	8.44294	10.0888	9.38802	11.3242	12.5976	12.1283	10.9396	11.4512	7.30378	12.183	12.2912	12.3373	2.80735	10.2479	12.3278	12.1668	7.7211	9.73132	11.1668	13.2269	7.15987	5.85798	10.1687	10.7507	6.59991	15.7004	10.4868	12.1824	11.6165	13.5557	12.2485	10.8305
						TCGA-BRCA	TCGA-AO-A12H	0	1234	black or african american	69	0	1	11.7091	7.77479	11.0327	7.70736	11.1478	12.5788	12.9078	11.1561	11.4727	10.0154	11.3581	12.7505	14.2317	1.58496	11.5807	12.3205	11.0868	8.41785	11.2998	11.7224	13.6866	8.8009	8.49185	13.3567	10.1724	7.52356	16.0159	10.5324	12.6366	10.4126	13.7028	12.2845	11.2644
						TCGA-BRCA	TCGA-E2-A576	0	1043	black or african american	69	0	1	9.40088	8.59991	9.75489	7.2384	10.4009	13.2691	13.1277	9.01681	11.9473	9.32193	10.9315	11.3315	11.4393	2	10.7381	12.2146	12.9097	8.45943	10.2348	11.464	12.8897	8.33092	6.35755	8.29002	11.2222	6.84549	14.6251	9.88874	12.349	11.0307	14.1885	12.6589	10.8572
						TCGA-BRCA	TCGA-E2-A56Z	0	252	black or african american	69	0	1	10.9174	8.46352	9.05528	5.90689	10.4666	12.5852	12.2324	11.2131	11.7536	10.813	10.7657	11.7561	12.1951	0.01	11.9352	12.0161	11.8455	8.46761	10.8265	11.5821	13.1928	7.2384	7.96578	11.3531	10.5878	5.97728	14.8951	10.3498	11.9968	10.9816	13.2586	11.7566	9.6987
						TCGA-BRCA	TCGA-A7-A6VX	0	317	black or african american	68	0	1	11.9084	8.38802	11.2252	7.07682	11.242	12.0931	12.1131	9.85175	10.7457	9.04712	12.1715	13.55	10.6312	3	11.2889	11.4661	10.9233	8.32193	9.85019	11.7419	13.9664	8.04985	8.15987	8.65821	12.0795	8.26209	15.8272	11.117	12.6673	10.6698	13.2263	12.3298	11.3095
						TCGA-BRCA	TCGA-A2-A0YF	0	1535	black or african american	67	0	1	11.9069	8.82972	11.3348	7.45121	10.8865	11.3559	13.4748	11.7423	11.9274	9.10329	12.6309	13.5846	13.4574	1	11.9054	12.425	11.5948	9.31967	11.8849	12.0918	14.3668	9.14211	9.51373	12.5483	11.5073	7.93664	15.7999	11.3515	13.2847	12.6878	13.6479	10.2095	10.6284
						TCGA-BRCA	TCGA-A2-A4RX	0	742	black or african american	67	0	1	10.5108	8.10329	10.6573	8.02791	10.7415	10.983	11.0077	10.0112	9.71081	10.2923	11.7805	12.1596	12.9381	4.52356	10.7773	10.5803	10.007	8.73809	9.07146	10.1599	11.6869	7.91289	8.86419	9.85643	11.6087	7.89482	16.2035	8.99718	12.7377	10.2107	11.9366	12.1411	11.1157
						TCGA-BRCA	TCGA-LL-A73Y	0	477	black or african american	67	0	1	12.316	9.16993	11.7661	8.51175	11.8642	11.5309	12.7138	10.6175	11.4383	9.56224	12.4813	12.1696	11.4429	3.32193	10.2432	11.2485	10.4686	9.35094	10.0014	11.346	12.2989	9.24317	9.47371	10.3945	12.9028	7.76818	15.5659	9.52356	12.6307	10.2992	12.6998	12.2473	12.2082
						TCGA-BRCA	TCGA-S3-AA11	0	421	black or african american	67	0	1	11.0272	8.35315	9.00282	8.26209	10.8688	11.9177	12.5331	9.66888	10.8533	9.84862	11.4126	11.6055	11.8541	1.58496	10.6193	11.7698	10.611	7.07682	10.5878	11.3129	12.5068	7.26679	6.67243	10.4767	10.9181	7.02237	15.87	9.81378	11.7578	9.89178	12.8234	11.8242	10.8704
						TCGA-BRCA	TCGA-OL-A97C	0	271	black or african american	67	0	1	10.0417	9.68475	10.6484	9.63118	10.6083	10.96	11.4226	9.1267	10.2467	9.04712	10.6715	11.3592	12.5852	3.32193	10.1189	11.2871	10.4378	10.6294	9.32643	10.4336	12.0566	9.07414	9.23362	9.59991	9.62205	11.2228	15.5409	9.36413	11.1497	9.59432	11.8922	11.0238	9.66888
						TCGA-BRCA	TCGA-OL-A5S0	0	620	black or african american	66	0	1	10.5098	9.3443	10.0014	7.33092	10.8971	12.3038	11.7719	9.2854	12.1824	8.24793	12.2321	12.3883	11.1504	1.58496	11.7271	12.888	12.2479	9.26209	10.2009	13.1304	13.2887	8.0607	7.59991	8.26679	11.5826	6.37504	16.2492	9.92926	11.5401	10.8533	13.716	14.417	12.1341
						TCGA-BRCA	TCGA-E2-A15L	0	626	black or african american	65	0	1	12.007	8.58496	10.6856	11.6202	11.2348	10.5981	13.3949	11.2438	10.9737	10.3454	12.3368	12.5255	13.0044	1	10.769	11.9712	11.4305	8.96578	10.1898	11.7903	13.5139	8.41363	9.45738	10.2444	11.0458	6.74147	15.949	10.2621	13.3574	11.9582	13.0447	12.286	11.3772
						TCGA-BRCA	TCGA-S3-AA10	0	586	black or african american	65	0	1	10.988	10.1687	11.5929	5.58496	11.5231	10.8106	12.0885	11.8746	11.5599	8.87344	13.0374	12.8152	12.1134	6.14975	10.9801	12.2871	12.4993	8.02791	10.3912	13.0728	13.8341	7.58496	7.26679	9.04439	12.4815	5.93074	15.9508	11.431	12.7678	12.7563	13.6274	14.2917	11.4757
						TCGA-BRCA	TCGA-AC-A3W5	0	504	black or african american	65	0	1	11.1573	9.68299	10.7887	8.75154	11.2819	11.8262	12.1222	10.5641	11.1248	11.3287	11.4455	11.9866	12.9627	3.32193	10.2228	13.1439	11.1586	9.06609	10.2574	11.2282	12.9044	8.90087	9.29462	9.50779	11.1972	7.25739	15.6282	9.78627	11.2318	12.2691	13.2226	13.5236	11.5864
						TCGA-BRCA	TCGA-A2-A0EQ	0	2426	black or african american	64	0	1	11.2808	9.39446	10.3923	10.7532	10.5897	11.2515	11.7121	13.1199	11.5421	11.0835	12.7419	12.432	11.92	5.35755	10.6312	11.5304	11.7785	8.49185	10.6248	11.9982	13.3959	9.07146	7.43463	8.47168	11.9816	7.69349	15.6257	10.4388	12.9309	12.3669	14.1312	12.6337	10.8925
						TCGA-BRCA	TCGA-S3-A6ZF	0	572	black or african american	64	0	1	11.178	9.12412	10.5565	8.37069	10.8353	11.6036	12.3851	11.374	10.8727	10.1267	12.0182	12.796	11.4828	3	10.5878	12.775	11.8404	8.27146	11.2755	11.3886	13.115	8.10852	8.07682	10.8057	12	7.45121	15.0836	10.8517	12.4284	12.2113	13.117	11.9341	11.6101
						TCGA-BRCA	TCGA-S3-AA17	0	424	black or african american	64	0	1	10.545	9.23601	11.2095	9.44501	11.2204	11.3729	12.6357	10.5177	10.69	7.93664	11.2107	12.3834	13.1118	4.64386	10.6008	12.6204	11.463	8.42626	10.9936	11.7065	13.103	8.41785	7.22882	10.7013	11.2426	7.70736	14.711	10.4998	12.8368	11.1548	12.9328	13.1246	11.5132
						TCGA-BRCA	TCGA-OL-A5RU	0	1219	black or african american	63	0	1	11.4372	8.50383	10.3049	8.12928	11.2603	11.8826	12.3332	10.1215	10.9366	8.99435	11.6631	11.9556	13.946	2.32193	10.4168	11.6325	10.9484	9.32643	10.3242	11.245	12.6124	9.87958	8.03342	9.59246	10.9322	7.31288	16.0519	9.12412	11.9388	9.12153	12.5311	13.1249	10.2889
						TCGA-BRCA	TCGA-BH-A5J0	0	715	black or african american	63	0	1	10.2009	9.23601	9.42836	10.5353	10.944	12.6965	12.3092	10.1059	11.8529	10.1176	10.9256	11.9982	11.2467	2.80735	10.8376	12.6101	10.8376	9.11894	10.2228	12.1209	12.7353	8.72451	7.45943	8.7879	10.3287	6.80735	16.1918	9.28077	11.3788	10.2336	13.1095	13.6006	10.8289
						TCGA-BRCA	TCGA-S3-AA0Z	0	629	black or african american	63	0	1	11.31	9.11374	11.6434	6.79442	11.3723	10.8773	12.474	11.2515	10.941	11.2046	13.1296	13.7391	11.905	3.90689	10.944	11.2113	11.0755	8.74147	10.7415	13.3731	12.6497	8.02237	13.121	9.98442	12.9681	7.32193	16.1454	10.0741	14.039	13.4009	13.7213	13.5113	12.6357
						TCGA-BRCA	TCGA-A2-A0CQ	0	2695	black or african american	62	0	1	10.8963	8.45943	10.6211	7.07682	11.0258	11.0947	13.269	10.1007	11.8903	11.5387	11.7834	12.1469	11.6175	2.32193	12.1573	11.5063	12.5748	8.54303	11.2963	12.3379	13.5806	8.2854	7.11894	8.74819	10.5333	6.52356	16.1164	9.86419	12.3915	10.6248	13.438	12.8166	11.7859
						TCGA-BRCA	TCGA-3C-AALJ	0	1474	black or african american	62	0	1	9.08481	8.37938	9.82814	8.5812	9.94398	11.9509	10.9418	8.68299	10.8361	7.66534	9.91886	10.7616	10.7013	1	9.73132	11.7398	10.2668	8.28077	9.08746	10.3608	11.73	7.31288	7.04439	8.08215	11.4325	5.58496	14.2843	8.65105	10.9181	10.5897	12.9917	11.3004	10.2216
						TCGA-BRCA	TCGA-LL-A441	0	996	black or african american	62	0	1	11.8138	10.0014	11.8792	9.33762	12.1802	12.9026	12.5878	11.5929	11.2755	8.633	12.8517	12.0984	11.3772	5	11.0634	13.1995	11.6488	9.76984	11.1357	12.3829	12.4078	9.29692	8.20457	10.3387	12.9029	8.59619	15.6436	10.3608	11.6689	11.0835	12.7822	12.8889	13.0047
						TCGA-BRCA	TCGA-EW-A6SB	0	760	black or african american	62	0	1	11.2912	10.1649	10.7082	5.55459	11.4497	11.9244	11.9099	9.24079	11.2064	6.91886	11.7394	11.7172	11.0203	2	11.0526	12.4696	11.5854	6.6865	10.3685	12.5011	12.227	5.20945	4.24793	6.50779	12.777	5.61471	14.7467	9.40514	11.5265	10.6555	13.4397	13.3218	12.3157
						TCGA-BRCA	TCGA-A7-A5ZV	0	368	black or african american	62	0	1	9.3443	9.17243	13.0355	8.81378	11.7532	13.0144	11.5503	9.35094	12.3404	7.02237	11.6124	11.2685	10.5803	2.58496	11.2825	12.474	11.1649	7.19967	8.59991	12.0848	11.908	7.42626	6.87036	8.33985	11.8134	5.97728	16.7361	9.53333	11.5774	10.275	11.8098	11.1997	11.9549
						TCGA-BRCA	TCGA-EW-A3U0	0	532	black or african american	61	0	2	10.8033	9.94544	11.7916	8.71425	11.272	12.1299	11.5338	10.7423	10.5343	8.27612	12.2231	13.1663	11.1592	4.16993	10.4969	12.2715	11.2432	9.97871	11.0451	12.332	12.7597	9.03067	8.27612	9.32643	11.6434	8.06609	15.5498	10.0715	13.1931	11.4959	12.2779	13.7465	12.0954
						TCGA-BRCA	TCGA-LL-A8F5	0	596	black or african american	61	0	1	10.821	9.18488	10.4959	8.03892	11.6965	12.6845	12.5041	9.67772	11.9651	10.8337	12.1344	12.817	12.1341	2.58496	11.9737	12.9767	12.9101	9.36851	10.3815	12.7885	13.1651	7.25739	7.76818	8.72451	10.6493	6.62936	16.5312	9.6865	12.5272	11.2986	14.1128	15.1521	11.9509
						TCGA-BRCA	TCGA-LL-A740	0	441	black or african american	61	0	1	14.2038	8.7211	10.1712	6.55459	10.5546	12.4038	12.6036	9.88264	10.9366	9.64205	11.8443	12.0324	9.98157	3.58496	9.36413	10.3652	11.3641	8.94544	10.1948	11.1478	12.4281	8.56986	9.05799	9.38586	13.0123	7.42626	15.3762	9.45533	11.6564	11.0875	13.5608	12.4742	11.1105
						TCGA-BRCA	TCGA-A2-A0D0	0	2048	black or african american	60	0	1	9.84862	10.1033	12.1935	5.45943	11.5416	11.7842	12.6722	10.0389	12.2805	9.49386	12.1373	14.3051	11.825	3.16993	12.858	13.4107	13.1185	6.49185	10.5517	12.2943	14.1778	6.06609	5.67243	8.04439	12.7339	4.16993	16.5725	10.3912	12.1411	12.3379	14.3259	11.988	11.6502
						TCGA-BRCA	TCGA-EW-A6SC	0	952	black or african american	60	0	1	11.5665	8.43879	10.6653	8	11.1085	11.4025	12.1137	11.2615	10.4676	9.90689	11.7313	11.8333	13.0527	2.32193	10.7822	11.8273	12.0053	8.98868	10.7665	11.6248	13.2703	9.17493	8.70736	13.5911	10.7582	7.8009	15.4137	10.6856	13.0694	11.0512	12.5517	12.0964	10.4747
						TCGA-BRCA	TCGA-EW-A6SA	0	510	black or african american	59	1	1	11.1855	7.90689	10.3576	7.15987	10.1137	12.732	13.6485	11.9954	12.0641	7.74147	11.8719	12.6384	12.9703	0.01	12.5428	11.1755	13.1041	8.87344	11.0868	12.258	14.3148	8.04439	8.03892	10.6184	13.4809	6.84549	15.3355	11.2015	13.7966	11.2597	12.9647	10.3761	11.23
						TCGA-BRCA	TCGA-EW-A2FR	0	1673	black or african american	59	0	2	10.9972	9.74147	10.8657	9.29692	11.4843	12.6452	12.902	10.6138	11.8289	10.3309	12.6671	12.7074	13.1702	3.90689	10.8719	12.5503	12.0154	9.83447	10.2131	11.8186	12.8859	8.81057	10.3696	10.7715	11.4757	7.61471	16.7026	10.1163	12.3354	11.7232	13.5659	12.4297	11.8486
						TCGA-BRCA	TCGA-A2-A4S3	0	666	black or african american	59	0	1	10.314	9.72962	10.1072	9.25739	11.3208	12.2052	12.4022	10.8226	9.83131	8.59619	11.9614	12.1818	11.0607	2	10.6257	12.3923	12.8965	6.82018	9.56796	10.7142	13.2386	6.94251	7.01123	8.45943	11.3157	5.32193	14.8168	10.8742	12.6073	12.5132	11.7707	12.4696	10.1599
						TCGA-BRCA	TCGA-GI-A2C9	0	3342	black or african american	58	0	1	12.4192	9.02237	12.1687	6.58496	11.7078	12.8859	12.6013	12.2318	11.9035	9.4818	12.255	13.4539	11.8823	4.70044	11.7419	12.8815	11.9513	8.31741	11.1364	13.1477	13.5288	6.94251	8.96	9.97011	11.1674	7.18982	15.8243	11.1824	12.0406	10.8872	13.2111	13.874	12.1144
						TCGA-BRCA	TCGA-EW-A1OW	0	694	black or african american	58	0	1	11.3504	8.99718	11.2378	6.39232	11.5063	12.061	11.9989	10.1898	10.7665	9.98157	12.8459	12.796	11.8815	1.58496	11.3432	12.3671	12.0875	8.73132	9.87805	11.7809	12.8072	8.12412	9.08215	10.2668	11.7356	7.10852	15.9989	10.0238	12.8719	11.357	12.5248	11.1124	11.3015
						TCGA-BRCA	TCGA-A2-A3Y0	0	1546	black or african american	57	0	1	11.733	10.3987	12.3451	5.85798	12.4207	14.1874	12.9259	10.4584	11.821	9.66888	13.6258	12.5603	12.8094	4.70044	11.1215	12.7509	13.158	8.17493	10.9908	13.7714	14.2351	7.14975	7.20945	7.94837	11.6847	6.90689	16.7677	11.0007	12.928	13.366	13.726	14.5183	12.7228
						TCGA-BRCA	TCGA-OL-A5RZ	0	679	black or african american	57	0	1	9.71253	7.56224	8.5157	9.11894	10.6812	13.6378	12.0372	9.67772	11.647	8.69349	11.1867	12.2342	12.6378	0.01	10.5878	13.0234	11.3864	8.25739	10.4574	11.1724	13.5248	7.94837	5.52356	8.60733	11.7574	6.18982	15.9158	10.29	12.0993	11.412	13.8103	10.2491	10.8865
						TCGA-BRCA	TCGA-BH-A0B0	0	2477	black or african american	56	0	1	11.733	8.84235	10.1357	11.9121	10.6856	11.7797	12.5904	9.61471	11.4019	10.2192	11.7398	12.1098	12.84	2.58496	10.6573	12.6303	10.7616	11.1046	10.6046	11.5177	11.5708	10.4707	9.03342	9.21189	10.6671	8.50383	16.417	8.87958	12.255	9.98299	12.8884	12.5957	11.2515
						TCGA-BRCA	TCGA-EW-A1OZ	0	1229	black or african american	56	0	1	10.7347	9.61287	10.4231	10.3219	11.4273	12.239	14.3685	10.2609	10.8872	9.41151	12.8226	13.4402	12.859	2.80735	11.4589	12.0144	14.0886	9.14466	10.3869	11.8963	13.8265	8.39232	7.71425	10.8392	11.1573	5.78136	16.1623	10.5831	12.6891	11.6179	14.5606	13.5565	11.7809
						TCGA-BRCA	TCGA-LL-A442	0	889	black or african american	56	0	1	12.6378	8.41363	12.7292	5.45943	11.1415	12.7249	12.3202	11.4305	11.1389	9.31967	12.7962	13.0771	13.4524	1.58496	11.5459	13.5088	10.9549	10.0755	10.749	11.6434	13.4265	10.2503	9.14211	9.5411	9.83131	7.9542	15.1968	10.5469	12.8178	11.5479	12.5206	12.3457	11.327
						TCGA-BRCA	TCGA-B6-A408	0	2072	black or african american	55	0	2	11.6693	8.88264	10.4584	7.56986	11.4491	12.3368	12.3041	10.8033	11.3799	10.2491	11.6175	12.0265	12.8098	4.85798	10.6733	12.5641	11.0396	7.46761	10.8258	11.4466	12.6421	8.80735	7.67948	13.2892	11.3253	6.56986	15.3122	10.0014	11.3977	9.91588	12.9502	13.7152	10.703
						TCGA-BRCA	TCGA-E2-A14X	0	972	black or african american	55	0	2	12.8531	9.31515	11.4594	7.36632	11.9495	12.6742	12.4988	11.4019	11.0307	9.83447	13.9359	13.4789	12.0258	5.45943	10.9816	11.8661	11.5594	9.79928	11.6711	12.4442	13.8457	9.47978	8.75822	10.2192	13.4748	8.72451	16.3631	11.178	13.1033	12.2735	13.8858	11.7334	12.8035
						TCGA-BRCA	TCGA-WT-AB41	0	1611	black or african american	55	0	1	9.05257	8.97441	8.92778	6.22882	12.0668	13.29	12.421	7.82018	11.6582	6.10852	10.3977	10.9189	9.97585	3.16993	9.97298	11	11.3197	8.14466	9.67772	11.1007	11.6198	7.13955	5	10.9418	9.33316	5.32193	13.7786	8.43045	10.6073	8.49185	13.3514	13.0556	11.6922
						TCGA-BRCA	TCGA-A2-A3KC	0	1102	black or african american	55	0	1	11.0063	9.04712	11.2958	10.5058	11.0203	11.6856	12.6571	10.7185	10.8194	9.16993	11.9024	12.2981	12.3482	2.32193	10.3332	12.2033	10.8803	10.2204	10.7134	11.1787	12.9342	10.6546	9.49185	11.8098	11.1718	9.16239	15.1	10.2058	12.2568	11.5226	13.0367	12.1861	11.3174
						TCGA-BRCA	TCGA-PL-A8LV	0	0.5	black or african american	54	0	2	11.3853	8.87958	11.2621	9.57365	10.4988	11.3842	11.6878	10	11.3426	11.3891	11.4414	12.8277	11.2691	6.40939	11.4574	13.3772	11.7279	8.37938	9.77643	12.4747	12.7478	7.64386	6.75489	8.87958	11.463	6.70044	15.3159	9.93517	12.0365	12.0536	15.3684	12.3214	12.4512
						TCGA-BRCA	TCGA-GM-A2DO	0	2596	black or african american	54	0	1	9.84392	8.40514	8.93958	9.29232	9.34207	10.9226	11.527	10.1254	10.4073	8.64386	9.88417	10.3848	9.5812	4.75489	10.2324	10.5333	10.2444	6.33985	9.79766	10.3185	11.8899	6.52356	5	11.0307	11.2779	6.59991	13.7903	8.06609	10.5613	9.76321	12.0399	12.3953	9.32418
						TCGA-BRCA	TCGA-A7-A4SE	0	644	black or african american	54	0	1	10.6777	8.83289	10.9513	6.91886	11.941	10.4594	11.8952	9.85487	10.3531	7.66534	12.0168	12.0577	11.4584	5.04439	10.0512	12.5474	10.5157	8.90087	10.1383	10.9233	12.8748	7.93074	8.86419	9.11634	11.4998	6.89482	15.1844	10.5137	11.7377	10.668	12.6902	12.3117	10.8673
						TCGA-BRCA	TCGA-A7-A4SF	0	545	black or african american	54	0	1	8.79116	7.19967	9.20212	6.79442	10.5831	12.7022	12.4788	10.0348	10.5784	9.97154	11.5162	11.1586	12.3926	3	10.5127	13.3925	11.3794	6.45943	10.5226	11.2119	13.4378	6.47573	6.16993	7.39232	11.0782	7.09803	15.4778	10.8408	12.3818	10.9636	12.1364	11.8262	11.2058
						TCGA-BRCA	TCGA-AR-A0TT	0	3316	black or african american	53	0	2	11.0573	9.29921	10.1898	11.3021	10.0307	12.4338	12.7279	10.8345	10.8384	7.47573	11.973	12.0286	13.1286	3	9.9263	12.2868	10.9498	8.30834	10.5226	11.6398	13.0161	7.24793	8.02237	9.73132	11.9567	6.47573	15.9093	10.4273	11.896	11.4589	13.0427	13.289	11.6119
						TCGA-BRCA	TCGA-AO-A0JE	0	2335	black or african american	53	0	2	11.3772	9.24555	10.6961	7.40088	11.2461	12.1036	13.2453	10.3987	10.8925	10.9381	12.341	12.7557	12.4722	2.58496	10.4696	11.1338	12.2464	8.42206	11.3515	11.6402	13.7622	8.17991	9.01402	9.42836	10.4594	8.61839	15.9269	10.6138	12.5796	11.9654	13.2335	13.7727	11.117
						TCGA-BRCA	TCGA-A7-A2KD	0	679	black or african american	53	0	2	12.3168	9.5216	11.2222	11.1874	11.1228	12.7663	13.6863	11.7249	10.8384	9.44501	12.7028	12.4406	12.6427	3.58496	12.0279	12.2871	12.7624	8.52748	10.9578	14.1549	14.2622	8.14466	8.83605	10.9744	11.4409	7.44294	15.7869	11.2779	13.2049	11.9578	13.8594	13.4033	11.3923
						TCGA-BRCA	TCGA-GM-A2DF	0	2155	black or african american	53	0	1	10.3083	9.65464	10.716	7.71425	11.3072	12.5135	11.7748	10.3729	11.314	8.9629	12.2559	12.599	11.221	0.01	11.8293	13.1373	12.3373	9.45327	10.0417	12.5189	13.8036	8.86109	7.67243	8.83605	10.0362	6.12928	15.7729	10.4273	11.0947	12.2782	12.5866	13.0777	11.7245
						TCGA-BRCA	TCGA-E2-A1L8	0	2240	black or african american	52	0	1	11.2521	8.02237	10.0512	8.41363	10.4242	11.617	13.3819	10.7415	12.06	9.29002	11.5372	12.3896	12.277	1.58496	12.3449	10.6564	11.5236	8.90689	11.4878	12.0241	13.0375	8.90388	9.18488	10.1523	11.461	7.25739	15.3993	10.2773	12.2981	10.388	13.4029	10.7194	11.6271
						TCGA-BRCA	TCGA-BH-A0AV	0	1820	black or african american	52	0	1	11.6896	8.60733	11.4671	8.01123	11.6138	11.3641	12.4615	10.6193	11.3242	8.57743	12.9785	14.1563	11.8884	3.32193	11.3332	11.3332	10.8154	9.60548	10.4878	12.4979	13.6613	8.46352	9.59619	10.2877	13.0997	8.00562	16.4954	10.6073	13.3516	11.7818	13.7457	11.2609	12.1392
						TCGA-BRCA	TCGA-3C-AALK	0	1448	black or african american	52	0	1	11.2603	8.30378	10.5469	9.70908	10.7091	12.0627	12.6704	10.2216	10.9629	10.5546	11.363	11.7879	11.8273	1.58496	10.1812	11.1843	12.3934	8.55842	10.5632	11.188	12.9766	8.94251	8.82018	10.4898	10.8186	7.98299	16.2078	9.35755	11.8757	11.1966	13.3181	13.6949	10.7599
						TCGA-BRCA	TCGA-OL-A5RY	0	752	black or african american	52	0	1	10.9701	9.53528	10.5594	8.72451	10.6448	12.1926	12.3918	10.6883	11.2894	8.52356	11.584	11.5641	10.941	5	10.4157	11.3745	10.749	9.59805	10.2842	11.2137	12.4202	9.19722	8.07682	9.9542	11.3072	7.8009	15.8495	9.03342	11.9858	11.3966	13.2242	12.9805	10.8065
						TCGA-BRCA	TCGA-A7-A4SD	0	441	black or african american	52	0	1	10.7887	9.5812	10.643	5.55459	11.2467	12.23	11.4783	9.75822	10.7108	8.60733	12.55	12.4265	11.5172	6.08746	11.4221	12.7989	11.0967	7.44294	10.1215	12.2216	11.6533	6.82018	9.2384	8.21432	12.2309	5.67243	16.059	9.04712	10.9622	11.0417	11.817	13.8236	11.6298
						TCGA-BRCA	TCGA-5T-A9QA	0	303	black or african american	52	0	1	10.8757	8.73132	8.55459	8.56986	10.8857	12.3734	12.7448	9.75154	10.817	9.86573	11.9447	11.5784	12.8228	6.52356	10.1812	11.736	12.0053	7.07682	10.0688	11.6883	13.1652	7.03342	6.30378	11.0049	10.5727	5.24793	14.8507	10.268	12.2267	10.4336	13.4769	12.2125	12.0848
						TCGA-BRCA	TCGA-AQ-A54O	0	1001	black or african american	51	1	1	9.99294	8.67243	9.2738	6.64386	10.584	13.2435	11.5493	9.67243	11.6878	10.7381	10.5382	11.2234	8.33092	0.01	11.4903	11.7727	12.4458	6.93074	10.6935	11.7095	12.4001	6.24793	6.61471	7.92481	11.1402	5.35755	14.467	9.60548	10.7381	8.9629	13.7936	12.3304	9.88264
						TCGA-BRCA	TCGA-OL-A5RX	0	878	black or african american	51	0	1	11.7292	8.26209	11.388	9.37287	10.865	11.7603	12.2027	10.1202	11.1517	9.97585	11.6078	11.6133	11.2306	2.58496	10.3891	11.8956	10.6821	9.33539	11.2992	10.9136	12.5177	9.61471	9.45327	9.81218	10.9425	8.38802	14.9098	9.74315	11.733	8.57365	12.4502	12.2167	11.6658
						TCGA-BRCA	TCGA-BH-A5IZ	0	567	black or african american	51	0	1	11.7703	8.80735	11.1338	5.55459	10.7142	12.0898	11.7056	10.5603	11.2015	9.72962	12.6702	12.9138	12.1951	2.80735	11.3343	13.7347	12.2467	8.93074	10.5324	12.1176	12.7474	7.32193	9.37938	8.15987	11.2697	7.56224	16.581	9.62022	13.277	13.1915	13.7457	12.7311	12.3567
						TCGA-BRCA	TCGA-S3-AA15	0	525	black or african american	51	0	1	10.1836	9.87036	11.2981	8.86109	11.1898	11.8078	11.3647	9.54303	10.5699	7.29462	11.7142	12.1815	11.1762	3.90689	10.2082	12.1963	10.7985	10.2866	9.72451	11.4635	11.9399	9.27612	9.01959	9.34207	11.9293	8.49185	15.0288	8.85175	11.363	11.7773	11.6289	12.4901	12.1938
						TCGA-BRCA	TCGA-A7-A6VV	0	313	black or african american	51	0	1	11.6519	9.02791	10.7969	7.2854	11.4215	13.1946	12.0032	10.744	11.0348	9.32193	13.2093	12.7895	12.6847	5.12928	11.3471	12.0289	11.1774	9.84078	9.10329	12.0081	13.2078	8.08746	8.85487	10.2155	12.2877	6.71425	16.9978	10.1059	12.4207	11.8982	13.0605	13.2252	13.5001
						TCGA-BRCA	TCGA-AC-A7VB	0	250	black or african american	51	0	1	11.4136	9.14466	11.5231	13.8105	10.8688	12.3109	13.1275	11.31	11.9819	9.35315	12.0406	12.31	12.4949	3	11.8037	13.2506	12.7324	9.43879	10.6944	12.2963	13.983	9.16742	6.82018	9.65284	10.4564	7.02237	15.4382	11.5367	13.4116	11.8269	13.0218	12.218	11.8134
						TCGA-BRCA	TCGA-AQ-A54N	0	78	black or african american	51	0	1	9.76653	9.48784	9.91439	4.58496	11.2697	12.3379	10.5934	8.3966	11.144	8.81057	11.2324	11.8876	10.6294	5.45943	10.6644	12.0389	11.5971	9.56415	9.64566	12.2438	12.2372	4.16993	5	7.86419	12.8023	3	15.3322	9.47371	9.86573	10.5699	12.7844	11.2819	10.944
						TCGA-BRCA	TCGA-B6-A0WZ	0	6292	black or african american	50	0	1	10.5727	8.35315	10.1408	8.49586	10.2491	11.7117	13.525	9.44087	12.0871	10.3276	11.1427	12.3578	12.9476	0.01	11.2767	12.7177	11.403	8.68299	11.875	11.5594	13.6741	8.12412	7.9542	8.5812	10.5459	6.96578	16.6887	9.98014	12.4515	12.1652	13.7889	12.7595	10.783
						TCGA-BRCA	TCGA-3C-AALI	0	4005	black or african american	50	0	1	10.0941	8.42206	10.1085	10.8918	9.95274	12.7207	12.0543	9.49386	10.875	11.1649	10.7254	12.2043	13.1191	2	9.4818	13.1269	13.4479	8.3443	9.86882	10.4828	12.0918	8.66888	7.17991	8.7211	10.7574	7.04439	16.5299	9.21675	11.2883	12.6321	13.4463	12.6273	10.0251
						TCGA-BRCA	TCGA-E2-A1LG	0	1523	black or african american	50	0	1	11.7985	10.1046	10.7499	5.2854	9.77149	11.6922	12.6092	10.9622	11.0485	9.52748	12.9922	13.8375	11.3168	9.89633	11.9833	12.1482	11.7275	7	12.1003	12.1808	13.4359	10.6909	9.69523	7.76155	12.776	7.60733	16.671	9.83763	14.004	11.7134	13.0588	13.646	12.9728
						TCGA-BRCA	TCGA-A7-A26G	0	722	black or african american	50	0	1	12.4535	9.74483	11.1911	7.74819	11.4717	11.9758	13.2312	11.363	11.3554	10.3185	12.6025	13.6131	12.3834	6.6865	11.6243	12.6039	11.4136	8.92481	11.6636	12.0238	13.5914	8.52748	10.4564	12.3387	13.2175	8.85175	16.4669	10.973	13.6527	11.0519	13.1504	10.8925	11.8692
						TCGA-BRCA	TCGA-LL-A6FR	0	489	black or african american	50	0	1	9.45738	8.04985	8.9571	6.32193	11.1408	13.0056	11.7916	8.00562	11.7249	9.48583	10.8933	11.7599	11.3174	3.45943	10.8681	12.3055	12.5762	7.40939	9.05528	11.584	11.0098	5.04439	5.61471	7.88264	10.9564	6.42626	16.9366	7.94837	11.23	10.7004	13.5132	13.1124	12.3063
						TCGA-BRCA	TCGA-LL-A5YO	0	440	black or african american	50	0	1	11.638	9.87498	10.1812	6.76818	10.5727	13.0288	10.5147	10.5479	10.8242	10.3197	12.5137	12.0262	10.3718	3.58496	10.5971	12.5209	11.0375	7.8392	10.1072	11.8727	12.7766	7.33092	6.79442	8.04439	12.454	6.58496	15.5372	9.55651	11.3095	11.5191	13.694	13.3016	11.1137
						TCGA-BRCA	TCGA-BH-A0E2	0	435	black or african american	49	0	2	10.0701	8.48784	10.0014	8.3837	10.3163	12.2592	12.1206	11.6008	11.1144	9.92184	12.2155	12.5008	13.379	3.80735	11.2831	12.0475	12.3845	7.66534	10.9263	11.849	13.6593	7.69349	9.34873	10.9951	11.4393	6.71425	15.9485	10.5981	12.5668	10.5098	14.1611	11.8865	11.1118
						TCGA-BRCA	TCGA-GM-A3XL	0	2108	black or african american	49	0	1	12.2816	10.7715	12.3939	4.9542	11.9163	13.2903	13.6671	11.3242	12.0825	10.84	13.5563	14.0169	12.3424	4.9542	11.7528	13.3146	13.4667	7.03342	11.1196	13.2195	14.2581	6.64386	6.75489	7.57743	12.9498	5	17.3362	11.6644	14.0533	12.6636	15.2523	15.0691	13.2415
						TCGA-BRCA	TCGA-LL-A7SZ	0	594	black or african american	49	0	1	9.19722	8.60733	8.53138	5.85798	10.4105	13.9706	12.2339	8.76818	10.5245	8.41363	10.9744	10.813	9.87652	2	10.058	11.6087	12.9975	8.21432	9.34873	11.0795	11.9564	7.86419	5.35755	7	11.1466	5	15.3726	8.70044	11.341	9.74651	12.7748	12.8065	10.2312
						TCGA-BRCA	TCGA-LL-A5YP	0	450	black or african american	49	0	1	10.352	9.10329	11.4226	7.11894	11.0498	12.7432	11.4762	10.8337	11.3652	9.20457	12.4344	12.245	11.0478	1.58496	11.3399	13.0495	11.8738	8.93958	9.29462	11.4398	12.9864	9.01123	8.33092	9.82655	12.255	6.67243	16.1546	10.6475	11.4778	11.9114	12.4244	12.6043	12.5399
						TCGA-BRCA	TCGA-OL-A6VR	0	1220	black or african american	48	0	1	12.3112	8.33985	11.3565	10.3859	11.8944	12.4491	13.2067	10.3772	11.7752	8.24793	12.5649	12.2043	13.4107	2.80735	11.2408	12.4328	12.2709	8.84235	10.5255	12.0372	13.7399	8.81378	6.74147	12.2586	10.8826	7.08746	16.0972	10.2324	12.3848	9.32643	13.4362	12.1864	11.0444
						TCGA-BRCA	TCGA-E2-A573	0	1062	black or african american	48	0	1	11.3608	10.0634	10.744	6.20945	11.3707	11.7283	12.1696	10.3772	11.7469	11.3146	12.8813	13.5183	12.1734	4.08746	11.7515	12.3404	11.7262	7.98299	11.7908	13.0411	13.3898	7.72792	7.15987	9.08746	13.1082	6.75489	15.8486	10.5294	13.2935	12.82	13.7437	13.8195	12.4051
						TCGA-BRCA	TCGA-A7-A6VW	0	285	black or african american	48	0	1	10.4315	10.4273	11.1421	6.26679	11.7524	12.5786	12.0674	9.09803	11.93	8.3966	12.3888	12.6484	10.1861	6	11.363	12.9233	12.2674	7.30378	11.2264	12.6411	12.217	7.12928	6.06609	7.46761	11.9944	5.58496	16.703	9.08215	11.8265	11.8906	13.3567	13.8371	12.1299
						TCGA-BRCA	TCGA-A7-A6VY	0	266	black or african american	48	0	1	10.8376	9.86264	11.0593	6.40939	11.5911	12.2288	12.6609	10.1724	11.8206	10.4888	13.0517	12.9493	13.3595	5.52356	12.8884	12.9502	11.8669	10.6891	10.9061	12.7832	12.7334	6.52356	6.76818	8.99152	12.4086	6.22882	17.1618	9.86264	12.5748	11.66	13.8642	13.9981	13.1477
						TCGA-BRCA	TCGA-B6-A401	0	2596	black or african american	47	0	1	11.1124	9.13699	11.1504	9.46148	11.9784	13.5157	12.5063	9.88417	11.3332	10.1124	12.0296	12.007	12.098	3.58496	11.4778	13.0926	12.0644	9.60177	10.7599	11.375	12.3049	8.76487	7.98299	8.81057	11.7134	7.44294	16.7584	9.26913	12.0011	10.6636	12.6371	13.825	11.9307
						TCGA-BRCA	TCGA-B6-A402	0	2281	black or african american	47	0	1	11.1849	9.57554	11.5236	5.83289	12.207	12.4533	12.708	10.7977	11.5551	9.69523	13.4566	12.5584	12.8744	2	11.6073	13.3002	12.9385	7.37504	9.70044	12.825	12.9108	6.45943	7.07682	8.75154	11.6018	4.64386	15.7617	10.6083	10.8138	11.3004	13.4861	12.824	13.599
						TCGA-BRCA	TCGA-E2-A570	0	931	black or african american	47	0	1	10.8258	8.70736	9.54689	6.65821	10.4305	11.3723	12.3813	9.88417	11.2366	9.23362	11.1472	11.6821	11.0775	0.01	11.6253	12.3247	11.178	8.19476	10.7566	10.7245	12.4582	8.05528	8.6865	9.65284	10.8478	7.25739	15.3024	9.15987	12.0175	10.8757	12.9116	11.9737	10.9758
						TCGA-BRCA	TCGA-S3-AA14	0	529	black or african american	47	0	1	12.2915	7.39232	10.3663	7.90087	9.94105	11.2432	11.2877	9.65105	9.98726	8.07146	11.268	12.0878	12.4653	1	9.35535	11.7628	11.5722	7.93664	9.57175	10.8494	12.3899	8.09276	8.40514	9.99718	10.4828	7.82655	15.5096	9.03342	12.0289	10.4919	12.1911	11.1459	11.0735
						TCGA-BRCA	TCGA-A7-A5ZW	0	326	black or african american	47	0	1	12.1062	8.75489	10.544	8.54303	10.7254	11.3907	12.5577	10.7515	11.0147	8.62571	11.7964	11.8982	11.0112	3.32193	10.4767	11.2906	11.1755	8.27612	10.8025	11.0573	12.7328	8.85175	9.37504	10.3387	10.7457	8.97728	15.5858	9.80574	12.0536	9.00562	13.0288	11.9787	11.6631
						TCGA-BRCA	TCGA-AC-A3BB	0	987	black or african american	46	0	2	11.4803	9.73471	11.368	10.4858	11.2088	12.5491	12.8834	10.363	11.3287	8.55459	11.9758	11.905	12.1712	3.80735	10.6662	12.6649	11.2192	10.9484	10.2143	11.7715	12.4499	10.2192	8.89178	9.56033	11.0451	8.46761	16.6377	9.82972	12.0921	9.48985	13.0651	13.3685	11.2456
						TCGA-BRCA	TCGA-A2-A3XZ	0	1532	black or african american	46	0	1	11.8591	9.78953	10.224	12.2003	11.1668	13.0876	13.0168	10.6839	11.6869	9.09803	12.2938	11.9823	13.656	4.45943	10.3619	14.009	14.5906	8.73809	10.3652	11.7052	13.2631	8.90087	6.45943	9.12928	11.4242	7.70736	16	10.8202	12.0644	12.4592	13.0823	13.4974	13.0175
						TCGA-BRCA	TCGA-A2-A3XV	0	996	black or african american	46	0	1	12.2312	8.81378	7.6865	5.08746	10.944	15.201	13.9935	8.24317	12.0362	9.09011	11.8803	11.8277	6.94251	0.01	9.29232	10.2946	14.1585	8.54689	9.66178	11.944	13.527	7.41785	7.30378	7.43463	11.2204	5.80735	15.0342	9.37287	12.1296	11.9912	15.7941	14.7541	10.6339
						TCGA-BRCA	TCGA-A7-A13D	0	965	black or african american	46	0	1	10.8325	10.0627	10.4818	5.90689	11.8289	10.7052	11.5285	9.70736	11.1089	4.39232	13.0205	12.6769	14.155	2.58496	10.8967	12.9421	11.5845	8.70217	10.3055	12.314	12.2827	8.15735	8.62022	9.94251	12.8386	6.12928	16.2181	10.0835	11.7004	11.9392	12.6821	12.3455	11.9595
						TCGA-BRCA	TCGA-LL-A5YN	0	447	black or african american	46	0	1	9.75989	10.7423	9.50383	11.3337	11.1421	13.0543	12.6414	9.64746	11.6198	8.45943	11.0265	11.2491	10.1737	5.61471	10.8416	12.2091	11.6008	7.50779	10.1137	11.3281	12.6096	7.29462	5.39232	7.48382	10.783	7.33985	15.0022	9.19722	10.7254	10.764	13.426	13.6389	11.3298
						TCGA-BRCA	TCGA-BH-A6R8	0	293	black or african american	46	0	1	11.444	9.92481	9.92184	5.97728	10.9643	13.1718	12.7104	10.3242	11.2509	10.7805	11.8803	11.9454	13.0711	1	11.5689	12.8994	11.4512	7.29462	12.4075	11.4168	12.7222	7.35755	6.56986	12.0126	10.7682	7.21917	15.7044	9.68475	12.0614	10.0715	13.3619	14.1822	10.9114
						TCGA-BRCA	TCGA-A2-A3XT	0	2770	black or african american	45	0	1	12.4139	11.1059	13.1343	7.39232	12.5486	12.0802	12.9998	11.5971	11.4305	10.3332	12.6799	12.8884	12.2134	2.58496	12.2932	14.0306	13.3326	9.0607	10.792	12.8112	14.2224	8.53528	7.48382	8.02237	11.2414	6.58496	16.4416	11.1618	12.3109	11.5641	14.1843	15.2136	13.2939
						TCGA-BRCA	TCGA-E2-A574	0	1179	black or african american	44	0	1	10.8049	10.6475	10.4115	4.24793	11.1111	11.7669	13.3316	9.25503	12.7518	7.14975	11.7249	11.875	11.5147	3.58496	11.6078	12.6968	13.251	5.24793	11.2058	12.7553	13.1201	5.75489	5.67243	8.25267	10.8234	6.2854	15.8092	10.0661	11.3929	11.0668	14.9739	11.7781	11.762
						TCGA-BRCA	TCGA-OL-A5RV	0	1062	black or african american	43	0	2	11.4497	8.31741	10.5699	9.50184	11.0802	11.4625	12.3939	10.1674	10.9091	10.4168	12.0362	11.545	12.366	3.80735	10.2644	12.3163	10.6284	8.79116	10.1007	11.2264	12.5577	9.41363	7.40088	10.1749	10.7574	7.7211	15.7007	9.71253	11.6751	9.3966	12.3786	11.5812	11.0293
						TCGA-BRCA	TCGA-B6-A400	0	215	black or african american	43	0	2	11.1364	9.61287	11.6479	7.62936	12.0607	13.487	12.4181	10.9114	11.9366	10.137	13.3108	13.5621	12.9511	4.75489	12.0705	12.4929	12.4793	9.20701	10.8925	11.8918	13.5457	7.49985	9.62753	10.1824	13.4472	5.08746	16.8445	10.8297	12.6575	12.5167	13.7668	13.9336	11.9733
						TCGA-BRCA	TCGA-OL-A6VO	0	858	black or african american	43	0	1	12.6425	8.19967	11.5741	5.2854	11.3842	10.6591	12.6066	11.6808	12.2387	6.12928	12.8162	12.9385	12.8826	1.58496	11.3004	12.9785	13.0262	8.59246	11.8925	14.2283	14.2058	7.10852	6.42626	8.44294	13.5247	5.32193	16.1089	12.0314	13.2763	13.1283	14.2647	13.1167	12.839
						TCGA-BRCA	TCGA-AC-A6NO	0	51	black or african american	43	0	1	11.617	8.98868	11.5343	7.91289	11.421	11.5622	12.4686	10.1849	11.0947	10.4388	12.1293	12.0845	11.7773	2.32193	10.4083	12.6898	11.5613	8.55842	10.8361	11.0795	13.2096	8.21432	8.13443	9.04712	11.4157	7.65105	15.1568	10.2726	12.4207	11.5299	12.8582	11.9421	12.5377
						TCGA-BRCA	TCGA-B6-A0IJ	0	7106	black or african american	42	0	1	11.4435	11.528	11.7969	8.90689	12.6284	14.065	13.1228	11.5053	12.3633	9.75489	13.3542	13.8338	12.5358	4.16993	12.7632	13.7298	12.4491	8.84862	10.7423	12.5682	14.2869	7	6.59991	8.46761	12.8065	6.40939	16.2263	11.3729	13.0696	13.2402	14.4366	13.8474	13.8443
						TCGA-BRCA	TCGA-A2-A3XW	0	1712	black or african american	42	0	1	10.058	9.50581	11.0961	9.26209	11.5333	14.2682	12.0406	9.35755	11.5627	11.0375	11.4078	11.5314	10.8849	4.52356	10.3354	12.4658	11.5584	10.3298	10.4939	11.5821	12.1202	11.1331	5.78136	8.58496	9.62571	7.33985	16.1392	8.55842	12.0258	10.1898	13.4846	14.6889	11.7125
						TCGA-BRCA	TCGA-AC-A2BM	0	3022	black or african american	41	0	1	12.2411	9.46761	11.6952	6.40939	11.3509	11.4378	12.608	12.0519	10.7482	9.49386	12.4448	12.7383	10.8114	3.16993	12.0617	12.1219	11.2003	6.9542	10.851	12.6198	13.5664	7.59991	8.21432	12.3354	11.5864	7.40088	15.0228	11.3614	12.6845	11.0768	12.2164	12.1573	11.8353
						TCGA-BRCA	TCGA-E2-A1LB	0	2306	black or african american	41	0	1	11.5289	7.40088	8.82337	5.93074	9.86419	12.4674	13.5475	9.59619	11.1886	9.36194	11.9451	12.6239	11.5338	0.01	8.81057	10.0056	12.1951	8.04985	9.98299	11.4924	13.4106	7.26679	8.16993	8.14975	11.9046	6.22882	15.6402	9.28077	12.1128	11.821	12.6711	11.899	11.2929
						TCGA-BRCA	TCGA-EW-A2FS	0	1604	black or african american	41	0	1	11.2252	8.66178	9.68299	10.7039	10.3365	12.9883	12.8765	10.733	12.1199	9.633	11.3509	11.9166	13.5328	2.58496	11.5028	11.9469	13.7326	9.3443	11.6257	12.168	14.1209	10.8978	8.25739	10.7895	11.5882	8.09276	15.1482	10.8289	11.6078	12.0042	14.3145	11.617	11.6821
						TCGA-BRCA	TCGA-AO-A0J4	0	1587	black or african american	41	0	1	12.006	9.02237	12.5672	7.96578	12.2866	13.533	13.4841	12.0617	11.3977	9.57175	13.2254	13.4617	12.5425	4	12.183	13.2578	12.4914	8.9629	11.2485	12.2064	14.8395	8.3443	8.26209	9.92035	12.5765	7.48382	17.054	12.1938	12.6339	12.138	13.691	13.9613	13.2649
						TCGA-BRCA	TCGA-BH-A42V	0	635	black or african american	41	0	1	12.5226	9.55651	11.5517	9.7879	11.8297	12.6475	12.7224	10.3912	11.3875	10.6018	12.4115	11.8615	12.9039	2.58496	10.7151	13.0116	11.7056	11.056	10.3387	12.0362	13.4647	11.2975	8.99152	11.4305	11.3614	8.89178	15.6364	10.4969	12.1173	9.79442	13.4247	12.7332	11.9751
						TCGA-BRCA	TCGA-OL-A5RW	0	1106	black or african american	40	0	1	9.6865	9.19967	10.8773	5.52356	11.4661	12.4793	13.4078	9.29232	11.8158	9.25267	12.6555	13.7066	10.7099	6.87036	11.3066	11.4949	12.265	6.62936	10.9851	12.2787	12.2252	5.88264	5.97728	6.56986	12.0217	4.9542	16.5434	8.78136	12.7729	12.3295	13.0147	13.5778	12.3219
						TCGA-BRCA	TCGA-OL-A5D8	0	973	black or african american	40	0	1	11.3146	9.17742	9.33092	8.98299	10.6193	11.6506	11.5656	10.6952	11.4009	9.41996	11.6443	11.4656	11.5831	1.58496	10.374	11.6156	11.6027	8.06609	9.92035	11.3078	12.4499	7.77479	7.10852	8.67596	10.8041	6.62936	15.1196	10.032	12.1431	11.733	13.3486	13.2175	10.6707
						TCGA-BRCA	TCGA-A1-A0SJ	0	416	black or african american	39	0	2	11.6935	8.31288	11.1555	10.5226	10.5028	12.8035	12.9352	11.5152	11.0035	8.87036	11.8994	12.3157	11.8761	2.32193	10.9986	11.5299	11.8404	10.4231	11.4419	12.1286	13.674	10.2923	9.03892	10.3129	10.7474	7.29462	16.222	11.3837	12.7566	12.1066	13.5292	11.576	10.6689
						TCGA-BRCA	TCGA-A2-A25B	0	1291	black or african american	39	0	1	12.2639	7.71425	10.224	7.40088	9.23362	12.1026	13.6129	11.2342	10.9233	10.9352	12.2805	13.2512	12.9542	1	11.8474	12.0396	14.0361	7.72792	11.0768	12.6656	13.8926	7.63662	8.85487	10.9151	12.3185	5.61471	15.892	11.1762	13.3106	13.2503	15.0097	10.9901	11.245
						TCGA-BRCA	TCGA-OL-A66O	0	528	black or african american	39	0	1	11.3191	9.14211	10.0307	6.49185	11.1586	13.7226	12.9991	10.1737	12.0888	10.4838	11.1824	11.888	12.4783	0.01	11.994	12.9467	12.9207	7.45121	10.4594	12	13.172	7.27612	6.14975	11.4372	10.6275	6.88264	16.1729	10.0553	12.6636	11.4414	13.9689	14.9239	10.7423
						TCGA-BRCA	TCGA-A2-A0CL	0	3015	black or african american	37	0	2	11.4747	11.4893	11.8471	10.96	11.5338	12.1874	12.7651	12.0838	11.1389	8.22882	12.869	12.3545	11.8769	3.70044	11.2981	12.7258	11.3044	10.115	11.9567	11.5826	12.6961	9.56224	8.59991	10.2761	11.9848	8.61102	15.0184	10.4727	12.2246	13.1698	12.6296	13.2968	11.3565
						TCGA-BRCA	TCGA-A2-A0D4	0	767	black or african american	37	0	1	11.3032	8.18982	11.9894	12.1696	11.8853	12.1662	13.8255	12.327	11.4974	8.31288	12.602	13.5104	13.9852	1	11.7444	12.5864	12.7292	10.7912	11.1874	12.2143	14.3099	10.66	8.07146	10.5304	12.0175	8.58496	16.8422	12.032	13.0551	12.8148	14.5518	10.9388	12.1501
						TCGA-BRCA	TCGA-AO-A0JA	0	655	black or african american	36	0	2	11.2131	8.55842	10.4988	7.84549	10.4584	11.6138	12.74	11.4083	10.9708	11.2556	12.1551	12.2848	12.6175	3.16993	10.5353	11.0768	11.1799	8.54303	11.1157	11.7415	13.6715	8.53916	9.54496	11.9322	10.8971	8.20945	15.8934	11.3044	12.4244	12.4679	13.4006	13.0159	10.933
						TCGA-BRCA	TCGA-A2-A04R	0	3709	black or african american	36	0	1	10.4778	8.10329	11.2668	7	10.363	11.8005	13.2665	10.5216	11.0708	5.70044	12.0865	12.6768	13.9521	3.80735	11.2883	12.0957	12.8204	8.50779	10.8588	11.9218	13.6129	7.85798	8.22882	11.2378	10.363	6.61471	15.7825	10.9629	13.0743	11.5722	12.4213	11.1072	11.2125
						TCGA-BRCA	TCGA-OL-A66I	0	714	black or african american	36	0	1	11.0921	10.4189	11.9058	7.18982	11.8746	12.3945	12.3507	11.3597	11.6839	9.02791	12.5137	12.1351	11.3886	5.12928	11.1059	12.757	11.1605	9.44294	10.9607	12.0647	13.3304	7.72792	8.90087	9.27845	12.3753	6.93074	15.3198	10.9285	11.643	12.0255	14.4142	14.6249	13.1214
						TCGA-BRCA	TCGA-PL-A8LX	0	5	black or african american	35	0	2	11.1517	8.43463	11.0735	7.2854	12.0647	12.4123	12.412	9.1267	11.4903	6.61471	11.6022	11.764	13.2952	2.32193	11.3112	12.8378	11.8463	9.04985	9.60918	11.1059	12.562	8.32193	7.91886	8.02237	9.50978	7.65821	15.5849	9.59991	11.6991	8.66888	12.9427	11.3772	10.9787
						TCGA-BRCA	TCGA-A2-A25E	0	3204	black or african american	34	0	2	12.4612	10.0084	11.3471	8.16491	10.4136	11.4242	13.3126	11.6008	11.4078	9.74651	12.8146	13.1591	12.7999	2	11.6671	12.4691	12.8437	8.71425	10.7698	12.7954	14.2905	8.55842	8.75489	11.0362	10.9571	7.82655	15.3771	11.6546	12.5753	12.4717	13.5348	10.3869	11.6926
						TCGA-BRCA	TCGA-EW-A6S9	0	463	black or african american	34	0	1	11.2336	8.11894	10.5774	7.30378	10.9166	12.2562	12.4805	10.7624	11.2204	8.58871	12.2393	11.9352	12.4391	1.58496	11.0458	13.334	11.0841	8.35755	10.6321	11.1561	13.4172	7.64386	8.5157	10.6618	10.9211	7.31288	16.6462	10.7022	12.2464	12.0137	13.3795	12.8918	11.0821
						TCGA-BRCA	TCGA-EW-A6SD	0	1010	black or african american	32	0	1	9.39017	9.43463	10.2538	5.2854	10.7715	12.031	12.4489	10.4564	11.2697	9.34207	11.7566	12.5929	12.8937	2.32193	9.09011	12.4049	14.3894	6.82018	10.1189	11.4924	13.3122	6.87036	7.47573	9.2384	11.4105	6.90689	16.2783	10.446	11.5226	12.5435	13.5083	13.4099	10.9344
						TCGA-BRCA	TCGA-BH-A0DG	0	2041	black or african american	30	0	1	10.8439	8.77808	10.7616	10.0182	10.4553	12.1102	12.72	10.3619	10.891	10.1137	11.825	11.9399	12.1415	2	10.0251	11.8226	12.9473	9.73471	10.0182	11.1818	12.9851	9.39017	9.39446	10.7895	10.8549	7.84549	15.8815	9.76321	12.1808	11.3163	13.1254	11.2264	11.0444
						TCGA-BRCA	TCGA-PL-A8LY	0	8	black or african american	30	0	1	10.7748	8.12928	10.3837	10.7846	10.9844	12.6508	12.0077	9.02237	11.1453	10.9337	11.3376	11.7262	11.3304	1	10.4126	11.218	11.3465	8.95128	9.75154	11.0375	12.8757	9.13699	5.39232	9.74483	11.0217	7.09803	15.1335	9.54303	11.7056	9.81698	12.8977	10.4543	12.0386
						TCGA-BRCA	TCGA-S3-A6ZH	0	641	black or african american	29	0	2	13.2549	7.43463	11.1383	6.35755	10.7423	13.5405	12.9217	11.0279	10.9701	7.76818	12.9458	12.5191	11.7846	3.32193	11.9185	11.3647	12.8267	8.81057	11.0688	12.5088	13.6867	7.94251	6.67243	11.4242	10.7065	7.83289	16.4438	11.1718	13.6807	10.5878	14.1369	12.3012	11.6027
						TCGA-BRCA	TCGA-PL-A8LZ	0	302	black or african american	29	0	2	10.9491	10.0701	11.2402	7.65105	11.3515	12.6702	11.933	10.6466	11.0505	8.47978	11.9855	12.5582	11.3055	2	11.3778	12.0007	11.0941	10.7065	13.178	12.4291	12.685	9.59246	9.12412	10.1357	11.2461	7.82655	14.9323	9.95274	12.6782	12.8051	12.551	13.441	12.6562
						TCGA-BRCA	TCGA-A8-A08L	1	304	unknow	89	0	2	11.4404	9.52552	10.4019	9.92778	10.6751	11.4813	12.4941	11.9549	11.5703	11.3608	12.9758	13.3049	14.4959	3.45943	10.9794	13.1599	12.6421	8.97728	10.1485	12.5418	13.3405	8.3837	7.88264	9.32643	12.5814	8.15482	16.2004	10.4635	13.345	13.5951	13.9469	12.0098	12.2857
						TCGA-BRCA	TCGA-A8-A06U	1	883	unknow	80	0	1	11.0348	9.03892	10.7781	7.7211	9.14975	12.3134	12.8817	11.137	10.1836	9.49985	12.0694	13.4011	12.2104	2	12.2104	10.6909	12.1376	7.52356	10.5343	11.9058	13.4592	7.36632	7.16993	9.05528	9.88264	6.67243	15.5801	10.8025	12.4252	12.2609	13.5194	13.1846	11.0741
						TCGA-BRCA	TCGA-A8-A06X	1	943	unknow	77	0	1	11.2088	8.34873	10.7288	7.81378	9.96723	11.9715	12.5875	11.2639	11.4471	7.27612	11.5675	12.1215	11.6948	1	11.9905	11.8459	11.7121	7.98868	11.1	12.1085	13.7306	7.5157	7.47573	8.11374	10.0238	6.62936	15.5081	11.0396	11.8688	12.9287	13.2546	12.0358	12.1867
						TCGA-BRCA	TCGA-A8-A08T	1	3409	unknow	64	0	2	12.2327	8.59246	10.6987	10.1267	11.4284	12.2825	13.1206	11.825	10.983	9.27612	12.3606	12.4458	13.5552	3.58496	10.9844	11.9469	11.2444	8.49185	10.8895	11.4858	14.3483	7.47573	8.21432	12.2476	13.2909	6.88264	15.6516	11.4954	12.6497	10.4083	13.4244	11.4979	12.7213
						TCGA-BRCA	TCGA-A8-A09X	1	426	unknow	62	0	2	12.378	9.17991	10.545	6.26679	10.0375	12.4189	13.5949	10.0875	10.9061	11.5793	13.3266	13.2368	12.1485	3	11.3168	12.1839	11.4783	9.21675	10.1408	11.8591	13.7265	8.3443	8.49985	9.24555	10.9278	6.6865	15.9066	10.1724	12.5627	12.625	14.2401	12.3009	11.8321
						TCGA-BRCA	TCGA-A8-A08J	1	1127	unknow	52	0	2	11.1561	8.66534	9.85953	8.91289	10.6786	12.9056	12.5708	11.314	11.2952	10.3509	11.6847	12.8427	13.6865	2.32193	11.7381	13.2354	13.0276	8.81378	10.7781	11.8529	13.1782	8.10329	8.21917	8.77149	11.5522	6.2854	16.7051	10.4009	12.4331	13.2485	13.3809	12.9368	11.2467
						TCGA-BRCA	TCGA-HN-A2OB	1	1900	unknow	45	0	1	11.2538	8.30834	11.3842	10.8956	11.183	11.5779	11.8781	9.91439	10.5821	8.85487	11.5892	11.5063	12.0768	2.80735	9.56796	12.0345	10.7185	10.0715	9.73978	10.8857	12.4798	9.38586	9.39446	11.1799	10.5517	9.6987	14.9816	9.34651	11.2992	7.67243	12.4964	11.8967	11.3815
						TCGA-BRCA	TCGA-A8-A08A	0	30	unknow	89	0	1	11.7507	9.14975	11.3332	7.32193	11.6479	13.5489	13.0435	10.2527	11.0861	9.76155	12.2137	12.0546	12.3729	2.32193	10.9887	12.2464	11.5469	8.43045	9.94983	11.3799	13.0307	8.30378	8.39232	8.32193	10.1331	7.3837	16.0444	10.363	11.6036	10.7082	12.8982	13.4667	12.1328
						TCGA-BRCA	TCGA-A8-A07Z	0	1371	unknow	85	0	1	10.8681	7.92481	10.3619	4.70044	10.6156	12.3971	12.1053	10.3772	10.7887	10.2021	12.203	11.7004	12.3677	2.58496	11.6729	12.2825	11.0272	8.37504	10.1497	11.8537	11.796	8.03342	6.47573	9.10852	9.53138	6.83289	15.8995	9.39017	12.0684	10.6138	12.8198	13.2116	11.3208
						TCGA-BRCA	TCGA-A8-A09I	0	1371	unknow	84	0	1	11.5498	9.12928	11.9589	12.2482	11.137	13.6911	14.1382	12.3504	12.3509	10.4242	13.1346	13.7669	12.7482	1	12.4289	13.4608	15.5482	8.26679	12.509	12.9296	14.8383	9.36413	8.46352	9.88417	11.8986	7	17.0217	12.0637	13.2799	13.7973	14.7286	14.7204	13.0644
						TCGA-BRCA	TCGA-A8-A0A1	0	365	unknow	84	0	1	11.1886	7.88264	9.9542	8.47573	9.77972	10.7271	12.6179	10.4828	10.0888	8.5157	11.5953	11.8868	12.3032	2	10.4988	10.6303	10.014	9.11114	10.6724	10.9159	12.1627	8.61471	8.52748	9.79116	10.1984	5.90689	15.9781	9.36413	12.2986	10.7381	12.6454	12.5859	10.5915
						TCGA-BRCA	TCGA-A8-A06Z	0	31	unknow	84	0	1	12.8327	7.94251	11.3559	12.9956	11.8769	12.8717	13.1569	13.137	11.2744	10.6961	12.9876	13.667	13.3389	2	11.87	13.2926	13.1972	9.29921	11.6764	12.7903	13.454	8.55842	8.32643	8.39232	12.557	7.37504	16.3151	10.9076	13.1044	12.3245	13.101	12.0543	12.1469
						TCGA-BRCA	TCGA-A8-A09Q	0	761	unknow	83	0	2	11.6434	8.64386	11.0035	8.64386	11.527	12.1592	12.8781	12.6025	10.4564	7.22882	12.7254	13.3419	12.6847	4.39232	11.9341	12.1929	12.1548	8.21432	10.3399	11.7415	14.1794	8.55842	8.16491	9.56986	11.0314	7.43463	15.8285	11.672	12.989	10.4419	13.23	12.6604	12.3393
						TCGA-BRCA	TCGA-A8-A0AD	0	1157	unknow	83	0	1	11.7296	7.40939	10.7091	10.5727	10.8887	11.2276	12.6616	11.1517	10.5971	10.0375	11.8846	12.537	12.8857	1	11.6939	13.1507	10.1849	7.94251	10.5028	10.242	13.4553	7.56224	8.69697	9.27612	9.43045	6.80735	15.9448	11.2216	12.2808	11.2479	12.3818	12.2877	10.7262
						TCGA-BRCA	TCGA-A8-A09Z	0	0.5	unknow	83	0	1	12.1573	8.70736	10.0265	14.0681	10.8106	11.3848	12.9322	11.3354	11.2952	9.93517	11.9751	11.8811	14.6175	0.01	10.7245	12.4998	11.0154	7.98868	11.224	11.6036	12.7665	8.10329	7.03342	10.5127	10.4798	5.80735	15.3701	10.4325	12.4625	10.8098	13.6507	13.4186	10.9723
						TCGA-BRCA	TCGA-A8-A09R	0	273	unknow	82	0	1	11.0327	9.66356	11.7678	11.6479	11.2848	12.0004	13.2405	10.944	11.0196	9.84706	11.9215	13.0241	14.484	1.58496	11.8357	12.1033	12.2432	8.09276	10.4979	11.204	12.8617	8.21432	9.24793	9.15482	11.2095	6.75489	16.4804	10.3487	13.1339	12.708	12.7471	13.2059	12.1283
						TCGA-BRCA	TCGA-A8-A07E	0	608	unknow	81	0	2	11.2889	10.3421	12.0818	9.29462	11.0715	12.1504	12.8572	12.255	10.7715	11.0224	12.7102	13.0016	12.6214	3.80735	11.1053	13.0265	11.3298	11.3794	10.4231	13.8075	13.4587	11.0928	10.1624	10.8384	11.1636	8.44708	16.172	10.6777	12.7674	13.0926	13.357	12.0977	12.1908
						TCGA-BRCA	TCGA-A8-A084	0	458	unknow	81	0	1	8.67243	7.62936	10.5999	9.44708	10.7474	11.4873	12.7345	9.93958	11.151	10.1712	12.127	12.6952	13.3358	0.01	10.4502	11.8823	10.1137	6.70044	11.7423	11.1059	12.8011	6.90689	7.56986	8.73809	11.1267	5.24793	15.5784	10.0224	13.0105	12.9986	13.4023	13.6855	12.03
						TCGA-BRCA	TCGA-A8-A07R	0	273	unknow	80	0	2	11.4722	10.0293	11.8376	9.56033	11.3576	11.9118	13.5269	11.9897	11.3151	9.633	14.0504	14.4053	12.4291	2.32193	12.2458	11.9989	12.991	6.16993	10.93	14.4522	15.1122	6.20945	7.41785	9.70044	13.7808	7.05528	16.9339	12.7209	13.6444	12.179	13.9082	12.902	13.5552
						TCGA-BRCA	TCGA-A8-A0A9	0	822	unknow	80	0	1	11.4341	9.42626	11.1799	6.55459	11.3185	12.0025	13.3004	10.9129	11.2378	9.20212	12.2381	12.6749	11.7343	0.01	10.7499	11.2161	11.902	7.91886	11.1774	12.4001	13.973	7.74147	7.71425	10.9425	11.2691	5.52356	15.9311	10.9226	12.8063	10.7624	13.3468	13.4584	11.9593
						TCGA-BRCA	TCGA-A8-A081	0	0.5	unknow	80	0	1	11.5651	8.29002	11.7078	14.3861	11.0437	12.2889	13.8344	11.6307	11.9436	9.59991	13.0386	13.9397	14.5206	7.69349	12.3641	13.2229	12.4579	8.45533	11.0423	12.7809	13.4458	8.02237	7.39232	9.04166	12.2009	6.78136	16.204	11.1209	13.6352	12.9724	14.3996	12.3211	11.265
						TCGA-BRCA	TCGA-A8-A09G	0	0.5	unknow	79	0	2	11.06	8.41363	10.1447	11.3891	10.5353	11.5299	12.9546	10.774	10.6777	11.7305	12.5885	13.5168	13.8287	4.39232	9.8857	12.4818	10.7895	9.10329	11.0307	11.2831	13.0461	8.49586	8.32643	9.45327	11.4179	8.55842	15.8768	9.92778	13.4236	13.0386	13.9428	13.687	11.9196
						TCGA-BRCA	TCGA-E2-A2P6	0	1051	unknow	77	0	1	11.1954	8.12412	11.0526	10.4419	11.0175	12.2095	12.444	10.7474	11.856	9.84392	11.5083	12.2243	13.921	1	11.1699	13.0694	11.3701	9.17991	11.1997	12.2589	13.5134	9.84078	8.09803	10.0808	10.2691	7.58496	15.9431	9.93811	12.6268	10.4284	13.5979	12.912	11.9622
						TCGA-BRCA	TCGA-A8-A08Z	0	1217	unknow	76	0	2	11.8711	8.82018	11.1699	7.48382	11.0485	11.368	12.6346	10.9248	10.7524	9.43671	12.4833	12.4128	12.29	1.58496	10.9787	11.6839	10.9643	8.64024	10.1886	11.5594	13.3534	8.37504	9.59059	10.6375	11.5411	7.46761	16.0086	10.9151	12.5289	10.0755	12.7626	12.0671	12.1926
						TCGA-BRCA	TCGA-A8-A07W	0	304	unknow	76	0	2	10.988	9.05257	11.0464	9.8933	11.1991	12.9478	13.0056	11.4414	11.0112	9.09803	12.58	13.2694	12.9405	2.32193	11.6027	12.63	12.5777	8.5812	10.0196	12.3641	13.5492	7.62936	7.62936	9.56415	12.6089	6.83289	16.6947	11.0519	13.1843	12.4954	13.4295	11.9333	11.6861
						TCGA-BRCA	TCGA-A8-A099	0	304	unknow	76	0	2	11.4737	8.07682	10.4388	11.9751	10.6046	11.6334	13.4366	11.2503	10.8986	8.31288	12.4163	13.2879	14.4387	2.32193	11.1053	11.2467	11.8517	8.54303	11.1485	11.9851	13.9666	8.18488	8.45121	10.9454	9.7211	6.10852	16.4586	11.327	13.3164	11.2929	13.0549	12.3049	12.0185
						TCGA-BRCA	TCGA-A8-A09M	0	1006	unknow	75	0	2	11.7553	9.82018	11.5727	8.59991	11.2615	12.3168	13.2776	11.0369	11.3729	8.48382	12.0196	12.8102	10.585	1	11.2143	12.5399	12.8736	7.8009	10.7674	11.7855	14.0083	7.53916	6.65821	13.0549	11.7296	5.93074	16.424	11.1013	12.7671	11.6613	13.196	13.6657	11.6142
						TCGA-BRCA	TCGA-A8-A094	0	0.5	unknow	75	0	1	10.6357	7.59991	9.98868	5.24793	9.94691	11.3875	12.1228	10.3365	11.1228	10.3476	11.4676	11.545	12.8937	4.9542	10.5157	10.6662	10.1898	6.88264	10.4969	12.1251	12.0984	6.14975	6.93074	9.49586	9.86264	8.66534	15.5142	10.1787	11.4666	11.5157	13.5248	11.8692	10.2515
						TCGA-BRCA	TCGA-A8-A06T	0	1614	unknow	74	0	2	12.3985	8.17493	10.9454	6.58496	10.9958	12.4046	12.48	11.3805	11.6551	7.45121	13.0758	13.37	14.8456	3.16993	12.1367	12.1466	12.7812	8.37938	11.9694	12.5365	13.9782	8.43879	8.21432	9.07414	11.275	7.45121	15.9413	11.2432	13.669	10.8895	13.1776	12.714	11.3454
						TCGA-BRCA	TCGA-A8-A090	0	0.5	unknow	74	0	1	11.7793	8.54303	11.4656	7.32193	10.7194	11.7628	12.7507	11.2556	10.0795	8.26679	12.4681	12.8504	11.2779	1.58496	11.1867	11.2527	11.8823	8.38802	11.2143	11.0224	14.0778	7.88874	8.16491	9.13186	10.4686	6.49185	15.1452	11.3783	12.9842	12.2324	12.1302	13.1754	11.5206
						TCGA-BRCA	TCGA-A8-A09E	0	1492	unknow	73	0	2	10.5255	9.67066	11.388	6.89482	10.8025	12.6085	13.4543	9.55075	11.1222	9.52943	12.6048	13.0128	13.3509	3.16993	11.9873	10.9069	12.3926	8.21432	10.7797	12.1693	13.4171	7.74819	6.6865	7.66534	11.3864	5.93074	15.3969	10.5265	13.2211	12.6059	13.5221	12.6504	11.3554
						TCGA-BRCA	TCGA-A8-A0A4	0	396	unknow	73	0	1	10.7288	7.18982	10.4533	11.5196	10.1059	11.3281	12.7721	10.151	10.6193	8.60733	11.2174	12.4648	11.6262	3.16993	10.1383	11.5216	11.3095	9.07948	10.2773	11.8321	13.3753	10.2992	8.43463	11.0375	10.4284	7.10852	16.0552	10.1007	12.705	11.0196	12.5445	11.3939	11.2101
						TCGA-BRCA	TCGA-A8-A07S	0	243	unknow	73	0	1	10.988	8.52748	11.4429	6.74147	11.0694	11.1376	13.1175	10.6812	11.0875	10.6707	12.3092	12.7885	12.9604	1	11.4939	11.4651	11.6234	8.37069	10.8368	11.8719	13.3639	8.37069	8.42626	9.22159	10.2854	7.03342	16.4283	10.4094	13.1994	12.3332	13.0658	11.9114	11.7317
						TCGA-BRCA	TCGA-A8-A096	0	0.5	unknow	73	0	1	12.0283	9.08215	11.9535	6.64386	11.7	12.0802	13.655	11.5594	11.3696	11.3281	13.1103	13.1624	12.7981	1	11.463	11.7017	11.875	9.55075	11.188	12.445	14.0289	8.57743	9.76155	10.5803	11.0921	7.19967	16.8532	11.3399	13.6482	12.5751	13.7344	14.0063	11.8861
						TCGA-BRCA	TCGA-A8-A08S	0	1004	unknow	71	0	1	11.1124	8.71081	10.6129	12.3526	10.4522	11.6738	13.423	10.6742	11.0614	6.88264	11.9643	12.6528	12.6709	1	12.0403	10.8857	11.6808	7.55459	10.8819	11.4194	13.9176	7.20945	7.43463	9.97585	11.8607	7.03342	16.3112	10.722	13.3353	12.0543	12.8652	13.1921	11.7932
						TCGA-BRCA	TCGA-A8-A08P	0	943	unknow	70	0	2	10.4909	9.46352	10.1434	8.43045	10.4788	11.8553	13.5141	10.8392	11.0042	8.3966	12.8248	12.6511	11.2802	5.24793	11.2796	12.2095	12.4049	8.3837	11.0808	12.7309	14.0337	7.53916	7.94251	9.70736	11.2064	6.91886	15.8104	10.8811	12.6649	11.4727	12.9502	13.7307	12.0286
						TCGA-BRCA	TCGA-A8-A09W	0	30	unknow	70	0	2	11.544	8.09276	10.9679	12.3947	9.49386	11.856	14.0748	11.1687	10.4988	9.4818	12.2612	13.3417	13.0632	1	11.1319	11.2414	12.8763	8.56224	12.0077	11.4589	13.7966	8.52356	8.94251	10.4747	11.3163	7.25739	15.29	10.9447	13.3898	12.8715	13.8178	10.2204	11.9163
						TCGA-BRCA	TCGA-A8-A07I	0	426	unknow	69	0	2	10.4625	8.20457	9.7879	6.80735	10.242	12.1424	12.3318	10.2761	10.2276	8.39232	12.164	12.8263	12.5328	2.58496	9.46761	11.6448	10.0112	7.96578	10.1649	10.7846	13.2087	7.30378	8.61471	9.82337	10.6284	6.9542	16.0188	9.96578	12.7713	12.6198	12.6243	12.3912	10.9129
						TCGA-BRCA	TCGA-A8-A079	0	274	unknow	69	0	2	11.3658	8.54303	11.6087	9.52552	11.2228	12.0095	13.8453	11.6257	10.9366	9.35315	11.9192	12.9762	11.7752	1	11.5406	12.5172	12.8857	8.02237	10.9084	12.1812	14.4408	7.87652	7.04439	9.18239	10.7698	6.06609	16.2786	11.6636	13.6653	12.1383	13.7729	13.1344	11.9407
						TCGA-BRCA	TCGA-A8-A07B	0	1308	unknow	69	0	1	10.5594	5.9542	8.58496	6.44294	9.42206	10.3106	11.3493	10	9.23122	8.55842	11.5241	11.6542	11.286	3.32193	10.9887	10.3641	10.8887	6.50779	8.82018	11.9177	12.8794	6.47573	8.17493	8.3966	12.6029	6.02237	15.1109	10.4062	11.8673	9.30834	12.1007	10.5028	10.8234
						TCGA-BRCA	TCGA-A8-A06R	0	547	unknow	69	0	1	10.4062	10.3287	10.0362	8.21917	10.2503	12.7836	13.329	10.8727	11.9028	9.74819	12.1558	12.9172	14.19	3.32193	12.0512	12.9652	11.8478	8.87652	10.6375	11.8206	13.6203	8.20945	8.6865	10.7022	12.25	6.35755	16.4768	10.0362	12.0658	12.0957	14.0916	12.906	10.858
						TCGA-BRCA	TCGA-A8-A09K	0	912	unknow	68	0	1	11.7104	6.75489	10.9744	11.9451	10.6733	11.5028	12.4843	11.0634	11.0967	10.032	12.3149	12.8734	12.5061	3.45943	11.4788	11.2485	11.883	7.22882	10.8154	11.7091	13.1702	7.36632	6.52356	8.68299	11.811	6.47573	15.0776	10.988	12.543	11.2854	12.7194	11.3745	12.0088
						TCGA-BRCA	TCGA-A8-A07P	0	334	unknow	68	0	1	11.8876	8.05528	10.8525	9.85487	10.8941	12.2174	13.2169	11.9798	10.6944	7.8009	12.4504	12.6115	12.8492	3.16993	11.7895	12.2119	12.9376	8.11894	11.2621	11.4788	13.0966	8.3837	8.51175	10.9679	10.403	7.2854	15.9988	10.8162	12.8337	11.3259	12.4265	12.5957	11.6073
						TCGA-BRCA	TCGA-A8-A083	0	0.5	unknow	67	0	1	12.1706	8.32643	10.0967	7.59991	10.0821	11.7661	13.0686	10.6092	11.3504	10.0224	12.3126	12.7524	12.6799	1.58496	10.0458	10.96	11.2509	8.55459	11.1478	12.2052	13.2338	8.5157	7.14975	8.56986	10.8517	7.60733	16.4612	9.74483	12.6821	9.61287	13.3597	13.2399	11.2633
						TCGA-BRCA	TCGA-A8-A07U	0	760	unknow	66	0	2	10.4105	10.5727	12.4838	8.29921	11.2668	11.9307	11.7004	10.7624	11.1209	6.18982	12.8267	13.3432	11.8692	2.80735	11.7448	12.1222	11.6411	10.3641	12.2143	13.1038	12.8903	9.31967	8.54303	9.02791	12.0255	7.74147	16.3232	10.5469	11.4424	12.0084	13.0172	13.8481	12.9618
						TCGA-BRCA	TCGA-A8-A06N	0	0.5	unknow	66	0	2	12.6101	6.87036	11.0735	13.7124	11.9318	12.2562	13.0577	12.2441	11.0674	6.12928	12.7151	12.3786	16.0198	5.35755	12.0741	12.6214	12.2597	8.36194	11.4414	11.7653	14.185	7.7879	7.02237	12.0617	11.7863	6.65821	15.7982	11.7703	13.4965	10.9181	12.9724	11.1917	12.5701
						TCGA-BRCA	TCGA-AR-A0TV	0	2288	unknow	66	0	1	12.3669	8.86109	11.8368	7.20945	11.5911	12.0637	12.2158	11.2825	11.2929	7.26679	12.9529	12.6136	12.9506	2	11.8154	12.2926	12.2565	7.83289	11.4189	11.9035	14.1879	7.65105	6.91886	7.65105	10.0334	6.37504	15.2484	11.2174	12.3166	12.3295	13.207	13.7026	12.3718
						TCGA-BRCA	TCGA-A8-A076	0	1642	unknow	66	0	1	10.8194	8.9629	10.6083	11.0681	10.978	13.138	14.0549	10.9687	11.1312	9.2854	12.4666	13.4118	13.2976	1	11.6008	12.5362	13.5338	8.46352	11.6271	11.098	13.9368	8.20945	9.37069	10.1849	11.1131	6.04439	16.3797	11.2963	13.1482	12.8174	13.29	12.8138	12.3979
						TCGA-BRCA	TCGA-A8-A06Y	0	791	unknow	66	0	1	10.8242	8.54689	10.8556	5.58496	10.9166	12.9562	12.3851	10.3083	10.9593	8.26679	12.1115	12.7729	11.3756	2.80735	11.3918	12.0046	11.7657	8.80413	10.5382	11.3066	13.4619	7.65105	7.58496	8.87344	11.4003	6.76818	14.6646	10.9758	12.2697	9.45943	12.0701	10.4168	11.817
						TCGA-BRCA	TCGA-A8-A0A2	0	579	unknow	66	0	1	12.1072	7.7211	10.6786	12.2189	11.1768	11.4435	13.0312	11.5445	11.0519	8.23362	12.3415	12.6355	13.2555	2.32193	10.9211	11.9192	11.8681	7.97154	11.144	12.0338	13.7717	8.66534	9.31515	12.7402	11.4194	7.60733	15.5875	10.821	12.6078	10.3038	12.9022	11.3163	12.5703
						TCGA-BRCA	TCGA-A8-A08H	0	0.5	unknow	66	0	1	11.0478	10.4594	11.4507	8.30378	11.5684	12.0495	12.1605	10.7977	10.5897	7.31288	11.9129	12.061	11.1693	1.58496	10.8688	12.4515	11.1427	11.4126	10.0821	11.3723	12.6702	11.2527	9.47168	10.1459	10.5078	9.26209	16.1211	9.75489	12.2983	11.7912	12.6461	13.3692	11.268
						TCGA-BRCA	TCGA-A8-A08C	0	881	unknow	65	0	1	12.5345	8.41785	10.8329	6.22882	11.3799	11.567	13.2577	10.7607	10.821	10.5245	12.7467	13.0417	11.3493	3	10.6555	11.676	11.3918	8.15987	11.1421	11.403	13.7508	7.43463	10.5565	8.91289	11.1966	6.82018	14.728	10.8626	12.7283	10.3026	13.349	12.1338	12.933
						TCGA-BRCA	TCGA-A8-A07G	0	577	unknow	65	0	1	11.0901	8.67596	11.2192	8.53916	11.375	11.5962	12.8595	11.0701	10.8025	8.60363	12.3432	13.3343	12.7138	1	10.5088	11.4538	12.2143	8.55459	10.4888	11.4737	13.1693	8.23362	9.80574	10.0566	11.1157	7.05528	16.9641	10.2854	12.6593	10.7339	12.4663	11.6384	11.6909
						TCGA-BRCA	TCGA-A8-A07F	0	577	unknow	65	0	1	11.9381	7.90087	10.7549	6.45943	11.032	11.8638	13.1074	11.5579	10.3685	9.82972	13.0718	12.6282	12.4086	3	11.3281	12.7438	11.4435	8.57365	11.5632	11.8914	14.076	8.17493	9.0634	11.888	11.6671	8.63662	15.2355	11.7981	13.5476	10.6627	13.3403	11.4742	11.9719
						TCGA-BRCA	TCGA-A8-A097	0	365	unknow	65	0	1	12.6812	9.51964	11.8265	8.96	12.1558	11.8078	13.108	11.4094	11.8285	9.68124	12.6985	12.6126	12.3493	2	11.0947	11.8723	12.8782	8.77479	10.7296	12.6806	14.0298	8.77479	9.34651	14.2271	10.8471	6.94251	16.3236	11.3542	13.7954	12.9828	12.7343	12.0372	12.6405
						TCGA-BRCA	TCGA-A8-A0A6	0	640	unknow	64	0	2	10.8765	8.12412	9.65464	8.75822	9.50779	10.6275	11.7052	10.7682	10.1523	8.90388	11.5512	11.9982	11.3663	2	9.85798	10.6411	11.0694	8.48382	10.2396	11.3875	12.3821	8.09803	8.09276	10.2167	10.4584	6.91886	14.8818	9.76155	12.4813	9.31061	12.8212	12.3498	11.0748
						TCGA-BRCA	TCGA-AR-A0TX	0	1972	unknow	64	0	1	11.3537	8.90989	11.144	12.2444	10.7524	11.7202	12.511	10.9665	11.1202	13.4025	11.9256	12.6996	14.205	3.70044	9.77314	12.9052	10.3106	9.61471	10.1007	11.6519	13.1716	9.94691	8.65821	9.33539	11.4914	8.40939	15.8745	10.6618	12.1066	13.5609	13.4375	14.1452	11.3826
						TCGA-BRCA	TCGA-A8-A06P	0	396	unknow	63	0	2	11.5651	8.86109	11.2288	9.3015	11.1286	11.7682	13.0995	9.92926	11.3723	9	11.9414	12.4785	12.4049	2.32193	10.6555	12.3126	11.3493	9.8857	10.1485	11.7826	13.1338	9.81858	9.52748	10.2703	11.1118	7.10852	15.9507	10.7245	12.5379	9.71081	12.7626	11.4998	11.4507
						TCGA-BRCA	TCGA-A8-A06Q	0	31	unknow	63	0	2	12.8437	8.18488	11.0362	7.39232	11.4083	12.5095	13.1989	11.1202	11.6795	10.2216	13.7801	13.8079	13.8926	2.32193	11.8811	12.7717	12.3783	6.42626	11.0042	12.8912	14.7624	6.44294	7.20945	9.17493	11.545	5.58496	16.4906	11.8937	13.49	12.9625	13.7547	10.9944	12.5314
						TCGA-BRCA	TCGA-E2-A1BC	0	501	unknow	63	0	1	11.0403	7.08746	9.08481	8.57743	9.29692	9.69697	12.2447	8.96867	9.63481	7.88874	11.1472	11.5023	11.1319	0.01	8.84862	9.85643	9.63662	9.97011	9.57932	10.4522	12.0798	9.18239	8.90989	9.3966	10.0403	6.53916	15.151	8.91289	11.7632	6.94251	11.3864	9.7039	9.22882
						TCGA-BRCA	TCGA-A8-A091	0	1004	unknow	61	0	1	12.1596	8.17493	11.3537	13.9014	12.4684	12.1437	13.3343	11.8708	11.1966	10.3174	12.561	12.8471	15.7209	3	11.6812	13.6912	10.676	9.61839	12.3939	11.5608	14.2191	9.82814	9.56605	13.7725	11.2755	8.39232	15.6183	11.5882	13.3556	10.6555	13.7986	12.1908	12.2886
						TCGA-BRCA	TCGA-A8-A093	0	546	unknow	61	0	1	11.2258	8.49985	10.8588	12.1219	11.1053	11.817	13.0605	10.9513	10.9672	9.35315	12.3829	12.3608	13.3519	1.58496	10.7288	11.4538	11.6083	8.21432	10.255	11.5221	12.8686	8.35755	8.87344	9.77972	10.6935	7.60733	15.1388	10.568	13.1966	10.668	13.4157	11.8853	12.5277
						TCGA-BRCA	TCGA-A8-A06O	0	396	unknow	60	0	1	11.8041	7.7211	10.7499	9.35094	11.0928	12.374	13.2482	11.7582	10.1997	7.49985	12.8564	13.3525	11.3707	0.01	11.5641	11.5265	12.8392	9.10591	10.9901	12.5003	13.9947	8.73132	8.3837	9.57175	12.3393	7.62205	16.532	11.4533	12.5798	11.4507	12.9176	12.4307	12.7484
						TCGA-BRCA	TCGA-A8-A08F	0	1004	unknow	59	0	2	11.5294	9.55459	10.6636	7.07682	11.1248	11.9679	12.7824	10.6961	11.0593	8.01123	12.5495	12.8613	13.4221	3	10.9432	12.3049	13.1699	7.72792	9.33762	12.5567	14.7507	8.46761	7.90087	11.4455	10.5718	6.59991	15.8699	11.5637	12.7093	12.476	12.4307	12.9317	12.0563
						TCGA-BRCA	TCGA-E2-A1LA	0	748	unknow	59	0	1	10.8978	8.97441	9.81057	7.24793	10.9447	11.9798	12.8309	12.1427	11.611	8.16993	11.3437	12.1261	12.2662	2.58496	11.444	11.6891	12.6425	6.89482	10.9285	11.7507	13.2821	6.61471	6.55459	13.7639	10.9144	5.39232	15.6687	9.68825	12.5601	10.6751	13.3737	12.7616	11.6724
						TCGA-BRCA	TCGA-A8-A086	0	396	unknow	59	0	1	11.823	8.55459	11.7842	9.15987	11.2107	11.8305	13.5103	11.352	11.2615	9.55651	12.4126	12.6553	12.4276	1.58496	11.7899	12.294	12.1787	8.47573	10.9535	11.7232	13.7832	9.11374	8.70044	14.6562	12.0529	7.2384	16.2281	11.2929	13.5836	10.9679	13.1539	12.1911	12.0658
						TCGA-BRCA	TCGA-OK-A5Q2	0	64	unknow	59	0	1	11.5454	9.08481	11.0815	12.2574	11.3652	11.9719	12.8134	10.633	10.9166	11.1209	11.9912	12.2461	12.3515	4.16993	10.7715	12.4244	11.3734	10.2633	10.4136	11.2396	12.937	9.87805	9.59991	10.4073	11.1364	7.94837	15.6488	10.2252	12.5275	11.3044	12.8277	12.4936	11.7809
						TCGA-BRCA	TCGA-A8-A07L	0	975	unknow	58	0	2	11.4336	9.0634	11.444	10.7423	11.0835	12.0331	14.1236	11.1261	11.2732	8.74483	11.7448	13.639	12.1157	1.58496	11.3641	12.372	12.3742	8.54303	10.7838	11.3652	13.7864	8.02791	8.23362	13.3475	11.0688	7.06609	15.6208	11.3454	13.2867	13.129	13.1684	11.4089	13.1599
						TCGA-BRCA	TCGA-A8-A09B	0	365	unknow	58	0	2	11.4727	8.36632	10.5157	11.2384	11.0855	11.8388	12.2758	10.0728	10.8289	7.77479	12.0365	12.7838	12.7166	2	10.8642	11.9614	11.7228	9.21432	10.5127	11.7964	13.4803	9.41785	8.54689	10.8971	10.4533	7.33985	15.7605	10.4929	12.1344	10.7846	12.7035	12.3832	11.9755
						TCGA-BRCA	TCGA-A8-A082	0	549	unknow	58	0	1	11.6768	7.19967	11.6991	10.0539	11.1459	12.0317	12.9179	10.5421	10.8384	10.3038	12.2538	12.057	11.9791	2	10.9418	12.0684	11.0553	7.98868	9.62753	11.9744	13.2625	7.96578	7.70736	9.23122	10.0795	6.33985	16.2045	10.0795	13.5846	12.224	13.3112	11.8459	11.196
						TCGA-BRCA	TCGA-A8-A09N	0	31	unknow	57	0	2	11.9388	7.55459	10.0014	6.42626	10.3805	12.0941	12.6344	10.7912	9.82655	8.3837	12.9542	12.6801	12.3166	1	11.2228	12.5038	10.8114	7.74147	9.86573	11.7669	13.4164	7.65821	7.82655	9.04985	11.6591	7.01123	15.129	10.7202	13.1033	11.4284	13.0265	10.6847	10.6193
						TCGA-BRCA	TCGA-A8-A07C	0	1034	unknow	57	0	1	12.668	9.35535	11.6622	5.70044	10.8673	11.3587	13.7498	11.7649	12.128	12.9294	14.056	14.2926	13.1679	1.58496	11.764	12.0718	12.9821	8.98584	10.7313	12.7871	16.7138	7.74819	8.83605	12.9063	14.725	7.07682	15.7299	14.3824	14.1964	13.0575	13.979	11.1917	13.1264
						TCGA-BRCA	TCGA-A8-A0A7	0	30	unknow	57	0	1	11.5157	9.53528	10.5934	8.03342	10.5906	12.1948	12.6575	11.7078	10.6312	8.64386	11.8134	12.3584	11.7465	3.45943	10.6733	12.2723	14.9191	8.36632	11.3089	11.2095	12.3429	8.24793	8.89178	9.82018	12.1241	6.96578	16.48	10.2527	12.7084	12.8152	12.7977	13.5831	10.4502
						TCGA-BRCA	TCGA-HN-A2NL	0	79	unknow	56	0	1	12.3021	9.47978	12.6602	5.88264	12.1322	12.2161	12.7256	10.6193	12.221	5.49185	12.8238	14.0275	11.7768	3.70044	10.9665	11.7549	11.6649	7.87652	11.8222	11.5962	13.4986	7.09803	6.88264	9.16239	12.9368	6.20945	16.2445	10.7674	14.0004	13.3662	12.9368	11.5353	12.3926
						TCGA-BRCA	TCGA-A2-A0T1	0	521	unknow	55	0	2	11.168	9.74147	10.6294	7.08746	10.8665	12.2842	12.7017	11.9281	11.4289	10.2761	12.6436	12.6096	11.6036	4.32193	10.1948	13.1997	11.8696	9.85798	9.94837	11.6764	11.9618	9.68825	8.82337	9.80413	11.5488	7.32193	16.4252	9.25974	12.4017	11.3886	13.1794	13.6518	10.7863
						TCGA-BRCA	TCGA-A8-A0AB	0	518	unknow	54	0	1	12.2345	8.79116	11.3061	11.0627	11.7104	11.7883	12.9537	11.9274	11.2426	9.5157	13.3727	13.3353	13.0765	1	11.525	11.7574	12.5226	8.08746	11.1344	12.0081	14.3547	8.05528	7.87652	9.73978	11.6555	7.40939	15.8454	11.9469	12.9917	10.6751	13.0825	9.94398	13.4838
						TCGA-BRCA	TCGA-A8-A08I	0	365	unknow	53	0	1	12.994	9.32643	12.5184	13.9749	11.0708	12.536	10.9708	11.9307	11.2761	8.81698	12.9304	13.5199	14.3503	4.39232	12.681	12.1715	11.3359	7.42626	11.4067	11.7846	13.5663	7.82655	6.02237	12.9721	11.8226	7.47573	16.8676	11.0362	13.5497	12.0708	13.6175	14.1687	12.3103
						TCGA-BRCA	TCGA-A8-A08B	0	1156	unknow	52	0	1	10.8009	7.43463	7.67243	7.02237	9.76155	10.5098	11.7457	8.95128	10.0634	9.43879	11.8502	12.2015	12.3329	5.52356	10.7515	11.6551	10.4868	6.02237	10.0526	11.0614	13.4992	5.42626	5.39232	6.58496	9.82496	5.49185	15.7592	9.25974	12.4909	10.7515	12.4147	12.2204	10.8626
						TCGA-BRCA	TCGA-A8-A08R	0	30	unknow	52	0	1	10.5831	8.49985	11.923	6.30378	11.7912	12.1777	12.9153	11.3326	11.3554	8.61102	13.1137	13.6096	12.5147	2	12.263	13.2719	12.1108	8.54303	10.6457	12.758	14.5093	7.75489	7.59246	9.64205	12.0088	6.89482	15.8493	11.6253	12.2926	12.6355	14.4621	13.4503	13.5702
						TCGA-BRCA	TCGA-A8-A09V	0	457	unknow	51	0	1	12.4898	7.88874	11.3515	7.77479	11.2076	10.7781	12.8372	11.9054	10.9651	7.24793	12.5474	12.464	13.4807	1.58496	10.697	11.5013	10.2444	8.19967	10.6591	11.6321	12.9136	8.13443	9.8857	10.9744	10.9425	7.67243	16.498	10.4221	12.8903	10.4656	12.432	11.5873	12.1121
						TCGA-BRCA	TCGA-A8-A07O	0	304	unknow	51	0	1	12.3228	9.50779	12.3424	7.35755	12.668	13.4029	13.5435	11.7964	10.9837	7.97154	13.7448	13.697	13.3273	1	13.1966	13.6997	12.9665	8.15987	11.0396	12.9427	14.2968	6.50779	8.96578	9.19967	14.6585	6.42626	17.8151	12.1309	13.7352	12.7217	14.6449	13.438	13.9808
						TCGA-BRCA	TCGA-A8-A092	0	942	unknow	48	0	2	11.5868	9.0954	10.5488	11.275	11.1542	12.6902	13.0952	11.3815	10.2831	8.66178	13.424	13.4707	11.3907	2.32193	12.2195	12.749	13.4575	7.77479	10.865	12.3239	13.7374	7.30378	7.99435	9.90839	12.2674	6.98868	15.7578	11.2119	13.8072	11.7707	13.7223	12.3211	13.1162
						TCGA-BRCA	TCGA-A8-A09D	0	1522	unknow	47	0	1	10.792	8.70044	11.2125	12.6287	10.5196	12.2814	12.4686	10.4083	11.0307	9.82177	11.899	12.4805	13.2448	2.32193	10.4157	12.2006	12.2273	10.8704	10.3912	11.7541	12.5836	10.3197	9.24555	10.4808	12.7885	7.30378	15.7201	10.9929	12.7252	12.1312	13.678	12.2267	11.1402
						TCGA-BRCA	TCGA-A8-A08O	0	943	unknow	45	0	2	11.7082	7.40939	10.4157	8.44708	10.703	11.0539	12.0251	10.7288	10.0782	7.15987	12.0025	11.8329	12.2544	0.01	11.021	11.7155	11.7022	8.69	10.5915	11.7871	13.405	8.224	8.26679	11.3669	10.9031	6.9542	15.2481	10.7448	12.4773	10.4051	12.9222	11.3652	11.4579
						TCGA-BRCA	TCGA-A8-A095	0	1277	unknow	45	0	1	12.2915	9.16491	11.2234	8.31741	10.5068	11.7985	13.2397	11.3315	10.7091	8.90388	12.6874	13.1954	12.3117	4.08746	11.4051	12.0593	11.0307	9.44501	10.6987	11.5622	13.7781	8.82655	8.67243	9.73978	10.374	7.84549	16.0698	10.7846	13.9119	12.3554	13.0627	11.8254	12.3509
						TCGA-BRCA	TCGA-A8-A085	0	1124	unknow	44	1	1	11.8738	9.15228	12.477	8.12928	12.2868	12.716	13.3545	12.8698	11.2784	7.93074	13.1513	13.5237	14.3006	2	12.6828	13.3353	13.2282	10.0182	11.4278	12.654	14.4888	8.3966	9.41151	11.9773	9.23601	7.33092	16.9253	11.7912	12.7723	12.8039	13.8608	11.0875	12.7465
						TCGA-BRCA	TCGA-A8-A08X	0	1308	unknow	42	0	2	10.9403	9.74987	9.40301	5	10.599	11.3636	11.9069	9.72962	10.4645	12.8933	12	12.8634	11.576	2	9.68475	11.9833	10.6266	8.18488	8.90388	11.8765	13.2015	7.8009	7.90689	8.85175	11.332	6.98868	15.364	9.77972	11.3875	11.6119	12.7119	12.3348	11.9125
						TCGA-BRCA	TCGA-A8-A075	0	518	unknow	42	0	1	10.5831	8.90388	10.2866	6.83289	10.7245	12.1808	13.1077	11.2709	10.9951	11.1447	12.6508	13.0901	13.2829	2	12.0647	12.4486	11.7283	7.99435	10.5755	12.3875	13.5638	7.85798	7.56986	9.54496	11.6904	5.52356	16.6646	10.7936	12.5803	11.8455	12.8609	12.6071	11.3426
						TCGA-BRCA	TCGA-A8-A08G	0	607	unknow	41	0	1	12.2691	9.19476	11.6515	9.62753	11.7262	12.3641	13.1066	11.8309	11.2685	10.4315	13.0946	12.5915	13.2211	4.24793	11.1453	12.6815	12.388	8.49985	11.007	12.4597	13.5716	7.8392	7.94251	10.8455	12.2423	7.39232	16.1273	11.1599	13.7023	11.838	13.4099	12.8439	12.2024
						TCGA-BRCA	TCGA-AO-A0JM	0	2184	unknow	40	0	1	10.3554	8	9.45327	5.52356	10.1911	12.3691	12.2877	11.1643	10.0782	10.0512	11.3864	11.8285	11.265	2	9.88417	11.6161	13.7513	7.69349	10.1033	10.9701	13.4337	7.2854	8.42626	9.29692	9.24317	4.90689	15.799	10.1774	12.4946	12.0067	13.4114	13.313	11.1643
						TCGA-BRCA	TCGA-A1-A0SP	0	584	unknow	40	0	1	12.2624	9.58684	11.0566	6.30378	11.3745	12.5367	13.4248	11.4828	11.5939	8.77808	13.1062	13.3218	11.8106	4.39232	11.4231	12.8773	11.8865	9.08481	11.5425	11.4378	14.2006	7.99435	8.00562	9.56605	12.8572	6.93074	16.2251	11.4656	13.3742	12.7052	14.0064	13.2534	12.6089
						TCGA-BRCA	TCGA-AR-A0TU	0	709	unknow	35	0	1	11.9244	9.64926	10.4909	4.16993	11.314	13.4838	13.2649	12.0607	11.7993	9.23362	13.948	14.1701	12.7004	0.01	12.6974	13.0201	12.8908	8.56605	8.07146	13.9907	15.2829	6.89482	5.67243	9.04712	13.2896	6.37504	15.7081	12.2046	13.0116	13.6668	15.3372	12.9084	12.5798
						TCGA-BRCA	TCGA-A8-A07J	0	365	unknow	35	0	1	11.5245	8.73809	10.6384	8.57743	10.7474	11.2709	12.4663	10.2621	10.7524	9.3443	11.6926	12.1846	11.7545	2.58496	10.151	11.3597	10.2773	10.2131	10.4105	11.1624	12.1771	9.9571	8.85798	9.37504	10.6083	7.64386	15.5424	9.90839	12.1799	9.44501	11.8681	12.0028	10.7004
						TCGA-BRCA	TCGA-AC-A23H	1	174	white	90	0	1	11.0674	7.65821	10.4798	11.3044	9.97298	13.1421	13.7519	10.9958	11.7628	11.7711	12.4035	13.9624	13.934	1	11.7172	12.784	13.2017	7.57743	10.8098	11.7427	13.6243	7.47573	9.48985	10.2131	11.4533	6.83289	16.9988	11.1293	13.661	13.6896	14.579	11.6711	11.7756
						TCGA-BRCA	TCGA-BH-A1F8	1	763	white	89	0	2	12.128	10.4522	10.8017	6.22882	10.3309	11.6407	13.9613	11.5718	11.9919	7.96578	13.7884	14.0367	12.821	2	12.8252	11.8622	11.9476	6.88264	11.5003	13.0358	14.1381	8.33985	8.55459	12.9414	11.6253	8.49985	15.6373	11.5994	14.1688	13.7633	13.9137	10.4083	11.3387
						TCGA-BRCA	TCGA-BH-A1FG	1	3736	white	88	0	1	11.9965	7.9542	10.1997	11.4341	10.4051	11.5831	13.2266	10.817	11.5793	8.66888	11.9614	12.6513	13.5114	1	11.5411	11.4046	12.0812	7.91886	11.3106	12.1611	14.0577	8.18982	7.85175	8.79442	11.3907	6.61471	15.5999	10.8431	12.4949	10.2796	13.1963	11.1189	10.4051
						TCGA-BRCA	TCGA-BH-A18N	1	1148	white	88	0	1	11.6724	8.22882	11.2929	6.90689	10.891	11.769	12.5438	10.3061	10.9794	6.65821	11.9293	12.6448	12.5748	1	10.8517	11.6764	10.8502	9.18488	10.4231	11.556	13.3643	8.40088	8.8857	9.62205	10.9256	7.20945	16.0614	10.1824	11.851	9.7364	12.3471	10.8688	10.2324
						TCGA-BRCA	TCGA-AC-A2FM	1	792	white	87	0	1	11.279	8.2384	10.7499	11.3734	10.5118	12.2357	12.1322	11.3426	10.9099	9.85331	11.9076	12.1715	13.5022	1	10.8242	12.4001	11.7797	10.115	10.9084	11.811	13.5727	9.92333	8.61471	10.2155	11.0908	7.56986	15.2558	10.8742	12.9495	10.2021	13.2342	11.9443	11.5043
						TCGA-BRCA	TCGA-BH-A8FY	1	295	white	87	0	1	10.7665	6.83289	9.25267	7.58496	10.4136	11.3208	12.3832	9.73809	10.8626	9.48583	10.8218	11.6083	11.1118	1	10.9564	11.144	11.7078	8.72792	10.9801	11.42	12.62	8.67243	7.12928	8.58871	9.55459	6.61471	14.9281	8.93074	11.633	10.421	13.3635	11.9344	11.3298
						TCGA-BRCA	TCGA-D8-A1XC	1	377	white	85	0	2	12.0286	6.53916	11.2264	7.90689	11.1157	11.4888	12.1529	10.7013	10.4553	10.1737	11.6384	12.0918	13.4836	7.35755	10.7936	11.5353	10.0512	7.70736	10.2644	11.1124	13.2992	6.6865	7.13955	8.14466	9.29692	6.87036	15.9418	10.4868	12.0283	10.3365	11.8887	11.2149	11.4078
						TCGA-BRCA	TCGA-A2-A0CO	1	3492	white	85	0	1	11.1222	9.59246	11.643	11.0614	11.1183	12.0109	11.528	10.3587	10.7099	9.50978	11.6493	11.318	12.5729	4.39232	10.0728	12.3396	10.7871	11.6542	10.1408	10.9593	12.1517	11.6909	8.9629	9.97728	10.7607	8.70736	15.3399	9.40088	11.2592	9.13186	12.3112	13.8866	11.0147
						TCGA-BRCA	TCGA-BH-A1EU	1	1286	white	83	0	1	12.7638	9.26444	11.9285	10.9844	11.7846	11.7394	13.3301	12.0522	11.7022	8.78136	12.9054	13.2753	13.3133	4.52356	12.0471	12.1558	10.5167	11.1472	11.697	12.0296	13.0442	11.5103	10.7117	11.8777	12.5253	10.1724	16.3741	11.1668	13.2834	10.9144	13.4357	11.3674	11.783
						TCGA-BRCA	TCGA-A2-A0SW	1	1365	white	82	0	2	11.2306	8.81057	10.1344	9.51964	10.7657	12.4896	12.8078	10.8098	10.69	9.53722	11.744	12.058	11.9396	2.80735	10.9922	13.0878	12.277	8.58871	11.5348	12.1699	13.3641	8.52748	7.77479	10.6036	10.8842	5.58496	15.1798	10.4073	12.7513	12.6452	13.7642	13.6595	10.9708
						TCGA-BRCA	TCGA-B6-A0IH	1	3418	white	81	0	2	10.8734	8.19967	10.9679	9.90539	10.2491	11.0654	12.7391	9.90238	10.0647	10.5196	11.374	11.7048	10.6573	0.01	10.1007	11.137	9.68124	9.80574	10.3869	10.7168	11.9163	10.4315	9.06878	10.9535	11.056	9.24317	14.2854	9.2503	11.6891	6.84549	12.0014	11.3449	11.4105
						TCGA-BRCA	TCGA-D8-A1Y1	1	302	white	80	0	2	11.7004	8.56224	11.0175	6.52356	11.5348	12.5105	13.2296	11.5727	11.3542	10.7039	12.3636	12.5627	11.7842	1.58496	11.8361	13.0163	12.3225	8.47573	11.395	12.2024	14.3396	8.224	8.82018	8.90087	12.8807	6.44294	16.0545	11.4051	13.5287	11.6515	14.0176	11.4273	12.4574
						TCGA-BRCA	TCGA-BH-A204	1	2534	white	80	0	1	12.357	8.8392	12.1611	7.64386	11.2342	11.2842	14.261	12.978	12.3974	9.48382	13.5244	13.7601	14.7001	2	13.3274	12.2799	12.5438	8.69697	12.4561	12.537	15.2002	12.1443	9.62205	13.5184	12.2027	6.74147	15.4134	12.7343	14.3571	13.3641	14.0566	8.72451	12.614
						TCGA-BRCA	TCGA-BH-A1F0	1	785	white	80	0	1	12.9427	10.3663	13.0688	8.82655	12.0396	12.1396	13.3712	12.702	12.1261	8.45943	13.0161	13.9325	13.2558	4.39232	11.8455	13.3053	11.6755	11.1768	13.0177	13.1349	14.0654	11.7561	9.80574	11.3493	12.4391	10.0028	16.2127	11.647	12.7211	12.3216	14.1624	13.7741	13.835
						TCGA-BRCA	TCGA-D8-A73W	1	385	white	79	0	2	10.5343	8.91289	11.567	7	11.3842	11.0993	12.3154	9.99152	10.8009	10.1586	11.676	11.9841	12.9431	3.32193	10.5343	12.1373	10.933	9.81378	11.3685	11.0168	12.9142	9.60548	9.11894	9.39874	9.5812	6.14975	15.6008	10.3487	11.9088	10.7134	12.2351	13.1331	11.2697
						TCGA-BRCA	TCGA-AC-A3EH	1	197	white	79	0	2	11.6856	9.02791	9.69174	13.2246	11.2621	11.923	13.3582	10.1007	11.1157	9.51767	12.1972	12.0954	12.0189	2	10.4083	12.4041	11.3966	7.9542	10.3608	12.1118	12.9353	8.05528	7.76155	9.03892	10.9425	7.06609	16.8766	9.79604	12.5551	10.2372	13.4479	12.5524	11.0314
						TCGA-BRCA	TCGA-BH-A18S	1	2009	white	79	0	1	11.9901	8.14466	10.9715	8.54303	10.7887	12.5304	13.1652	10.9873	11.1768	9.76818	12.3737	12.8661	13.5783	1	11.2527	10.8773	12.5411	7.33092	11.3332	12.0255	13.9006	8.16993	7.65821	8.88874	10.7748	7.2854	16.1873	10.4818	12.9189	9.51767	13.1331	12.64	10.5613
						TCGA-BRCA	TCGA-BH-A1EY	1	538	white	79	0	1	10.8424	8.21432	10.0498	12.0396	10.1599	11.4041	12.0536	10.6239	11.0458	10.5028	11.1098	11.9758	10.5622	4	10.3072	12.4838	9.3966	7.74819	10.1111	11.3168	12.431	8.04439	8.42626	9.17991	10.4041	8.47168	14.9989	9.76653	11.5708	9.59991	12.7503	11.0701	9.93517
						TCGA-BRCA	TCGA-BH-A1EN	1	2127	white	78	0	1	11.9708	8.48784	10.6891	5.70044	10.8727	11.7586	13.2466	10.1357	11.0928	9.23601	12.8408	12.6359	13.8004	3.16993	10.7082	12.3273	11.9012	8.98299	10.3399	12.1124	13.0914	8.94837	13.5885	9.48583	11.294	8.19967	16.0644	10.4325	12.0651	13.7037	12.9867	11.9524	12.4861
						TCGA-BRCA	TCGA-BH-A203	1	1174	white	78	0	1	10.6384	9.64746	9.9571	7.18982	10.5353	12.2729	13.6449	12.0269	11.3537	9.75322	12.437	12.8702	13.2641	3.80735	11.4757	12.1649	12.0293	8.67596	11.0627	12.1988	14.1798	8.50383	8.28077	8.98014	11.6239	8	16.2629	11.1485	12.6384	12.4988	14.1881	11.8607	13.412
						TCGA-BRCA	TCGA-BH-A0BP	1	2296	white	76	0	1	10.3026	8.43045	9.9263	10.7142	10.4737	11.168	11.8914	9.32643	10.4828	9.47573	11.0389	11.757	13.2189	1.58496	10.5859	11.6751	11.9058	10.7134	9.86573	10.9837	12.0389	9.13699	8.11374	10.4502	10.764	7.50779	15.5776	9.15735	11.2228	10.2033	12.0526	11.8746	11.1453
						TCGA-BRCA	TCGA-E2-A1B4	1	1004	white	74	0	2	11.4419	8.15482	9.19722	12.5646	10.7465	12.4969	13.5039	9.3966	12.2784	10.4808	11.8471	12.3633	11.9054	1.58496	10.4747	12.2917	11.6484	7.39232	10.8297	12.4112	13.8841	7.61471	7.8392	9.83605	11.0021	6.14975	16.657	9.54882	12.117	8.46352	13.9428	11.7703	11.5445
						TCGA-BRCA	TCGA-B6-A0IP	1	3926	white	74	0	1	12.1089	8.94251	11.1376	10.3399	11.0505	12.0338	13.2014	11.7448	11.3168	9.58308	12.4944	12.6571	11.4094	2	11.2866	12.2624	11.9392	8.92184	10.6952	11.9174	13.36	8.7039	8.23362	11.1836	10.7607	6.30378	16.228	10.4584	13.1157	11.363	12.7661	12.6441	12.5321
						TCGA-BRCA	TCGA-A2-A0CS	1	2348	white	73	0	2	10.1561	7.33985	9.62388	5.49185	10.1007	11.6974	12.6664	9.74651	11.06	9.71253	11.4099	12.218	10.5517	1.58496	11.3242	11.978	11.2697	7.18982	10.5058	11.2228	11.66	7.24793	7.48382	8.44708	10.5058	6.55459	15.6479	8.47978	12.3581	9.17243	13.1233	12.0785	10.1787
						TCGA-BRCA	TCGA-BH-A1FR	1	1642	white	73	0	2	11.5348	7.15987	10.5206	7.43463	10.6175	11.9593	12.0192	10.8186	10.8734	9.89633	11.4067	12.0664	13.2359	1	11.1749	11.6961	10.5699	8.47573	10.2831	11.1649	12.8535	8.86728	8.16491	9.01123	9.81858	7.07682	15.6004	10.2228	12.2228	10.6528	12.4597	10.8895	10.4564
						TCGA-BRCA	TCGA-B6-A0RP	1	3126	white	73	0	1	11.6546	8.38802	11.6627	7.26679	11.2837	11.676	12.9252	11.2906	11.168	10.0888	12.1411	12.8842	12.3982	3.16993	10.988	12.2565	11.3348	8.87344	11.0875	11.776	13.3419	8.6865	9.20457	9.73471	10.29	7.22882	16.4427	10.7356	12.8811	10.0967	12.3875	13.6317	11.3614
						TCGA-BRCA	TCGA-A2-A0CU	1	158	white	73	0	1	11.0928	7.72792	11.3415	11.9762	11.1176	11.7372	12.4207	11.5845	10.7134	9.39446	12.0671	12.6582	14.3835	2.32193	10.5527	13.0051	11.8061	9.62205	10.4083	11.1254	13.5274	9.41151	9.57554	10.7056	11.0512	7.34873	15.6453	11.5498	12.6099	11.8811	12.4278	10.1636	10.9715
						TCGA-BRCA	TCGA-BH-A18U	1	1563	white	72	0	2	10.7364	8.37938	11.032	11.3337	9.78463	11.9972	13.5214	10.4041	11.3253	10.6221	12.444	13.5684	13.2327	0.01	11.9125	12.2527	12.6291	7.7211	10.5765	12.2503	13.5941	7.87652	8.3966	9.23362	11.1548	6.85798	16.1472	10.7855	12.7459	13.4722	13.8849	11.5517	11.7415
						TCGA-BRCA	TCGA-PE-A5DC	1	1430	white	72	0	2	10.2586	9.13186	10.4828	11.4497	11.0382	11.7164	12.9846	10.7432	11.6658	8.77479	11.3247	12.097	11.8517	3.16993	11.5929	12.5056	12.2315	9.86264	10.6662	12.1056	13.7155	10.1923	7.97154	10.0417	10.3554	7.07682	15.5354	10.2703	12.1861	10.3432	13.1671	12.2213	10.6978
						TCGA-BRCA	TCGA-OL-A66K	1	1275	white	72	0	1	11.5498	8.12928	11.1344	7.8392	11.0788	11.7415	12.8453	10.4168	11.0741	9.50184	11.8754	11.5831	12.1929	2.32193	11.0868	12.4745	11.6693	8.2854	11.3718	11.318	12.5387	8.84235	8.76487	9.55651	10.3276	7.56986	14.543	9.89936	12.0098	9.05799	12.4916	12.2729	11.7624
						TCGA-BRCA	TCGA-BH-A0EA	1	991	white	72	0	1	10.9024	7.65821	10.8242	11.0748	10.6952	11.0654	11.9315	9.7879	10.2348	9.07414	11.6443	11.7532	11.5684	2.58496	10.6036	11.5618	10.1007	11.3531	10.3309	10.7237	12.2333	10.8564	9.86728	10.3399	10.6184	8.20457	15.0111	9.30378	11.7515	7.49985	12.0931	11.2342	11.4686
						TCGA-BRCA	TCGA-E9-A2JS	1	904	white	72	0	1	11.1843	10.3332	11.9986	11.6609	12.1674	12.3969	13.2537	11.7744	11.6631	9.91289	12.6312	12.4729	12.4582	2.32193	11.7087	12.128	13.5003	7.76818	10.7288	11.5551	14.5901	7.03342	7.91886	10.3387	11.6069	7.52356	15.8245	12.059	12.4419	14.0663	13.4301	12.7058	12.3063
						TCGA-BRCA	TCGA-E2-A1LE	1	879	white	71	0	2	10.5803	9.54496	10.6644	7.97728	9.96145	12.6094	13.4729	10.1699	11.7275	11.3404	12.0109	13.1228	11.623	3.32193	9.80574	12.64	12.2288	10.3197	10.9226	11.8661	13.0098	10.0098	9.13699	9.31061	11.7793	7.67948	15.7376	9.94251	11.3404	12.3707	13.8545	12.0937	12.2201
						TCGA-BRCA	TCGA-AQ-A0Y5	1	172	white	70	0	2	11.2544	8.35755	10.4051	10.2204	11.3869	12.0165	13.0291	10.0795	11.1319	8.30834	11.7322	12.9816	14.4065	2	11.9447	11.9758	12.0258	8.54303	10.4594	12.3242	13.1415	8.04439	9.7879	9.50779	11.1997	8.73809	17.2975	10.2216	12.8807	10.5651	12.6749	12.4988	11.1954
						TCGA-BRCA	TCGA-BH-A18T	1	224	white	70	0	1	11.0485	10.0741	12.4528	5.32193	11.9654	13.4194	13.564	10.8234	11.9069	8.5157	13.7181	14.356	13.2726	3	12.2095	13.5681	12.6876	9.15987	11.1954	13.4039	14.7976	8.15987	11.178	9.71768	14.0364	5.64386	16.3531	11.9901	12.7667	13.0942	13.8649	12.5805	13.287
						TCGA-BRCA	TCGA-GM-A2D9	1	1812	white	69	0	1	10.3264	8.04439	8.47168	8.84862	10.2046	10.9972	11.7969	8.59991	10.4888	9.25503	10.3987	10.9491	11.5206	1	10.1408	10.9322	11.2556	8.35755	10.3117	11.0389	12.1706	8.09803	7.33092	8.96	9.72281	6.06609	14.7034	8.90689	10.9129	8.99435	13.0483	11.545	10.1267
						TCGA-BRCA	TCGA-BH-A1FL	1	1673	white	69	0	1	12.426	8.65105	10.2204	8.73132	10.6138	11.8899	13.1532	11.5536	11.3918	9.78463	12.958	12.4906	12.7423	3	10.8392	11.1079	11.6018	9.36194	11.4818	11.6939	13.6479	9.33092	8.93369	14.434	12.1437	7.85798	14.8798	11.056	13.35	10.5812	13.0959	10.6312	12.3581
						TCGA-BRCA	TCGA-AR-A5QQ	1	322	white	68	0	2	10.4594	10.7599	10.5517	6	11.3304	12.464	12.399	10.0634	11.683	7.85175	12.3154	11.9784	11.8439	6.72792	11.568	13.0686	12.5384	7.59991	10.1836	11.3009	12.7725	7.66534	7.29462	7.85175	11.0741	6.80735	17.7498	9.16491	13.329	12.8657	14.8839	13.9079	10.9672
						TCGA-BRCA	TCGA-B6-A0RQ	1	4267	white	68	0	1	11.8944	7.36632	10.774	10.6582	11.3365	12.2709	12.4471	10.2866	11.2935	11.8895	12.2494	12.7532	12.1867	2.32193	10.888	11.7211	10.9174	9.84392	10.4168	11.7461	13.2637	9.48583	7.59991	11.1491	11.1561	7.85175	16.083	10.2046	12.4009	7.77479	13.0509	11.2384	12.2058
						TCGA-BRCA	TCGA-BH-A1EO	1	2798	white	68	0	1	10.9549	8.22882	9.99718	9.89633	10.2228	10.236	12.1564	10.4126	9.9901	6.12928	11.4929	11.6207	10.6119	2	10.8242	11.0607	9.95565	8.00562	10.0362	10.585	12.5906	7.9542	9.29921	11.2574	9.72962	7.21917	14.4897	10.196	12.4312	9.80896	12.116	10.2668	10.7657
						TCGA-BRCA	TCGA-BH-A1FD	1	1009	white	68	0	1	12.1219	9.32867	11.7686	6.18982	11.6896	12.4128	13.3507	11.3794	11.7797	9.79279	13.4171	13.4491	13.5063	1	12.4964	13.3486	12.1855	8.41363	11.6587	12.8234	14.8918	8.25267	8.64024	8.62205	10.722	6.08746	16.7067	12.581	13.5142	12.3038	12.5999	11.7364	12.1991
						TCGA-BRCA	TCGA-AR-A0TR	1	160	white	68	0	1	12.5321	7.09803	10.8757	10.2935	11.6188	12.8819	13.4959	10.8711	11.06	7.40939	12.4735	12.6161	13.5874	3.70044	10.584	12.6667	11.6528	7.54689	10.9076	11.4656	13.1249	7.70044	7.7879	8.50383	10.851	6.79442	15.5968	11.0307	12.8746	9.47573	13.4897	10.4136	11.703
						TCGA-BRCA	TCGA-B6-A0WV	1	2417	white	67	0	1	10.8963	8.58496	10.2408	8.50779	9.93811	12.2559	12.5668	11.1261	10.4858	10.062	11.8459	12.5646	12.92	2	12.0334	11.7814	11.8451	6.90689	10.3387	11.8309	13.5058	6.55459	7.10852	10.5718	10.5887	5.20945	15.4087	10.796	13.2915	12.453	12.8688	11.1855	11.0928
						TCGA-BRCA	TCGA-BH-A1EX	1	1508	white	67	0	1	11.623	8.84549	11.0634	7.43463	12.5438	13.4684	13.7704	11.4336	11.6555	10.2192	13.198	12.7337	12.7228	1	11.4362	13.1989	11.6843	8.64024	11.4702	12.0345	13.5139	8.64024	9.53528	10.8811	12.6633	7.53138	16.6271	10.8994	13.0504	10.7065	13.0701	11.5421	11.4645
						TCGA-BRCA	TCGA-BH-A1FJ	1	1927	white	66	0	2	9.44708	7.57743	10.8533	6.30378	11.2192	12.7731	13.5242	12.7183	11.227	10.973	13.0437	13.2323	11.8903	1	11.8013	12.3415	12.1855	8.65821	11.0168	12.1386	14.3055	8.59246	8.91289	9.77643	10.0307	6.42626	16.4997	11.1867	13.8662	13.0439	14.081	12.0708	11.7043
						TCGA-BRCA	TCGA-A2-A0T2	1	255	white	66	0	2	10.3498	9.81218	10.0485	5.24793	11.794	12.3432	12.0865	9.45738	12.1328	11.9278	12.6898	12.8694	12.2966	1	11.4944	12.8545	11.8467	9.33092	10.4615	12.7576	12.3769	7.94837	7.90087	9.05799	12.3677	6.82018	16.9501	9.43254	11.9679	10.9571	13.6721	12.3961	12.4969
						TCGA-BRCA	TCGA-E2-A15M	1	336	white	66	0	1	12.4331	10.3163	11.9968	11.8715	10.9794	11.4533	13.5063	12.0941	11.5622	8.91886	13.2186	13.6486	13.4108	3.45943	12.1	12.4689	11.2917	11.4062	12.3151	12.9144	13.8247	11.1131	10.9607	12.007	12.5445	9.6987	16.2379	11.196	13.9156	12.0583	14.5187	12.6223	11.8317
						TCGA-BRCA	TCGA-B6-A0IB	1	3941	white	64	0	2	10.6421	8.91886	10.0593	8.71768	10.9922	12.7522	13.9567	10.1163	11.7653	11.8918	11.4635	12.6695	11.7499	2.58496	11.9614	12.6587	11.7309	9.13443	10.7474	12.5663	12.9944	8.69349	7.63662	7.93664	11.4656	6.45943	15.6211	9.74315	13.0622	11.102	13.111	13.9347	12.3228
						TCGA-BRCA	TCGA-E2-A14Z	1	563	white	64	0	1	10.5594	8.47168	10.2538	11.3826	11.4242	12.4022	13.0063	10.5392	11.1966	6.45943	12.1633	12.9385	10.9715	3.32193	10.7707	10.3231	11.2883	8.66178	10.3685	12.0937	13.3267	8.85175	7.77479	8.76155	11.5479	7.40088	15.0822	9.97441	11.927	11.1693	12.9374	12.2082	11.2697
						TCGA-BRCA	TCGA-A2-A0SV	1	825	white	63	0	2	11.6027	9.15228	11.1163	6.24793	11.7117	13.6342	13.5633	11.1383	11.3619	10.7756	13.8124	13.1852	12.3194	1	11.8811	13.2046	13.1286	8.93074	11.6411	13.1652	13.9921	8.45533	8.24793	9.80413	12.0532	6.93074	16.5948	10.8345	13.4724	12.8549	14.4724	14.4383	12.6052
						TCGA-BRCA	TCGA-B6-A0IK	1	571	white	63	0	2	10.2597	8.02237	8.99152	10.3129	8.40514	12.1975	12.2903	9.61839	10.6339	10.7288	12.5634	12.5333	13	2.32193	10.7805	11.8498	11.6398	7.89482	10.8431	10.7549	12.2357	7.2384	7.39232	9.3837	10.1472	7.55459	16.6885	9.26444	11.8738	13.1322	14.5171	11.4798	10.6636
						TCGA-BRCA	TCGA-AC-A2FE	1	2636	white	62	0	2	11.2697	9.63481	11.7377	11.6702	11.8967	12.2067	13.0851	10.9986	11.3971	7.91886	12.4142	12.3026	12.0904	5.24793	11.1861	12.2494	11.8086	9.99577	10.8918	11.6931	13.0526	10.2107	8.44294	10.9144	11.545	8.16993	15.5715	10.6475	12.2167	10.6733	13.0473	14.0631	11.7863
						TCGA-BRCA	TCGA-AR-A2LK	1	1649	white	62	0	2	11.8967	8.68299	10.8408	9.01959	10.9794	12.204	12.7095	12.1283	10.4828	5.67243	12.1963	13.0427	12.4391	2.80735	12.0192	11.633	12.2706	7.88264	10.3083	11.4671	14.2922	8.10329	8.74147	12.3529	11.8572	7.2384	15.7067	11.6362	13.5143	11.3815	12.8865	11.6991	11.3531
						TCGA-BRCA	TCGA-B6-A0I9	1	362	white	62	0	2	11.3945	8.74147	10.3332	9.88111	10.6384	12.8609	12.1163	11.3875	11.2615	9.3837	12.1573	13.0429	13.7786	2	11.236	12.3373	11.5063	8.24317	10.9816	12.1662	13.49	8.15482	7.18982	9.47168	11.0694	6.22882	17.3143	10.6294	12.5421	12.3902	12.2609	12.1994	12.0573
						TCGA-BRCA	TCGA-BH-A1F5	1	2712	white	62	0	1	12.6845	7.65105	10.0688	8.69	9.8392	10.4717	13.0315	11.7013	11.7394	10.1536	12.0914	12.8447	12.0272	0.01	11.7507	11.3437	10.5934	6.12928	11.5727	12.4307	14.0093	7.10852	8.24317	14.783	12.8244	7.33092	14.0427	11.374	12.3837	9.79279	13.4023	7.50779	10.9672
						TCGA-BRCA	TCGA-AR-A1AT	1	1272	white	62	0	1	10.4336	8.90087	10.5527	10.9636	10.7566	11.6303	12.4189	10.1254	10.3072	9.76653	12.0634	12.1978	12.0728	2	10.242	11.327	11.8273	9.11894	10.4073	10.9929	13.1351	8.74819	8.32193	8.17991	10.0755	7	15.9262	9.76321	12.4714	12.1228	12.6812	13.2825	11.4742
						TCGA-BRCA	TCGA-B6-A0X4	1	860	white	62	0	1	11.4466	6.37504	10.6239	5.90689	10.7305	11.5868	12.0417	9.66356	10.7871	10.9614	11.5985	11.7465	12.5343	0.01	10.9643	11.0539	10.6768	5.64386	9.99859	11.0908	13.2311	5.64386	11.2615	7.7879	9.83447	7.41785	15.9206	10.3106	11.6129	9.10066	12.3424	10.8819	11.2088
						TCGA-BRCA	TCGA-E9-A1NG	1	786	white	62	0	1	11.6027	9.77149	10.1536	5.97728	11.528	11.8357	12.7692	10.8918	11.2883	9.15482	12.3685	12.6475	12.692	1	11.1874	11.6475	11.3603	10.0112	10.5401	11.7887	13.1743	9.15482	10.3465	10.5736	11.3304	7.12928	17.073	10.2467	12.5786	11.0231	13.1155	12.749	10.6421
						TCGA-BRCA	TCGA-A7-A13E	1	614	white	62	0	1	10.7916	7.60733	11.8937	5.50779	11.0203	12.0592	11.8088	10.9226	11.4556	9.0607	12.9724	12.6142	13.2834	2.90689	10.1408	13.0145	11.4507	7.37069	11.0718	13.1202	12.922	6.74147	12.7855	10.6243	12.3726	8.46352	15.3991	10.5507	11.7495	10.7669	12.2435	11.7809	13.0084
						TCGA-BRCA	TCGA-BH-A1FB	1	3669	white	60	0	1	12.4025	8.96578	11.5594	10.2773	11.3526	11.7826	13.0746	11.3061	11.0119	9.56796	12.6191	12.6889	11.9524	4.80735	11.2033	11.8459	10.9226	9.34207	10.7822	11.7013	13.491	9.85953	9.55842	11.817	12.0161	9.08215	16.1175	11.0147	12.5498	9.84862	12.8154	11.6421	11.66
						TCGA-BRCA	TCGA-E9-A1NF	1	1072	white	60	0	1	10.4858	8.51175	9.87036	6.39232	10.6129	12.0137	12.4954	9.72451	10.9535	9.56796	10.7773	11.9267	12.0382	1.58496	10.6511	11.821	11.0741	8.90989	10.3421	10.5934	12.3652	8.59619	9.67066	9.66	11.2033	8.01681	15.6486	9.0607	11.0084	9.45738	13.2996	11.3565	10.1561
						TCGA-BRCA	TCGA-BH-A18P	1	921	white	60	0	1	11.463	7.58496	10.1836	10.1573	10.7879	10.8017	12.895	11.0505	10.6786	10.2033	12.2264	12.6584	13.0305	0.01	10.2021	11.8178	11.0133	8.42206	11.2738	11.188	13.6559	7.88874	8.31288	9.99859	11.0848	6.42626	15.7143	10.9929	13.214	12.1978	13.346	12.0708	12.2589
						TCGA-BRCA	TCGA-EW-A1P8	1	239	white	58	0	2	11.3371	9.55075	11.5411	5.55459	11.9883	12.0447	12.1898	10.4838	11.5517	8.93958	13.4731	13.5422	12.72	3.16993	11.9586	13.0201	11.9256	10.0888	10.6636	12.4468	16.183	7.78136	6.71425	8.37069	12.7453	5.88264	16.258	13.2393	12.7942	12.4038	13.8342	13.2311	12.1724
						TCGA-BRCA	TCGA-A2-A0YT	1	723	white	56	0	2	11.8982	8.90689	10.9315	9.51767	11.0382	13.4964	12.9556	11.9381	11.3038	11.1843	12.4344	13.4177	13.5657	3.16993	11.444	12.5836	12.6618	9.75154	11.3066	12.6071	14.5615	9.22641	8.2854	9.88874	11.1978	8.06609	16.6279	12.2276	12.8283	13.1543	13.3428	11.7266	11.865
						TCGA-BRCA	TCGA-BH-A18J	1	612	white	56	0	2	11.4919	9.24079	10.062	8.87958	11.3923	12.2805	13.2216	11.6179	11.4305	9.86109	12.2456	12.6788	11.7262	3.70044	10.988	12.8688	11.1447	9.20945	10.584	11.7368	13.4389	8.64746	8.7879	10.2923	10.7305	6.62936	15.5295	10.3498	12.9544	11.9469	13.2536	12.1328	10.4073
						TCGA-BRCA	TCGA-BH-A18Q	1	1692	white	56	0	1	11.8194	7.59246	11.2538	8.54303	10.8265	12.2441	12.1322	10.6768	10.9643	10.7515	12.9353	13.6174	11.1917	3.32193	11.4067	10.2877	11.6008	8.94251	10.6707	12.1935	12.8148	9.26444	7.59991	10.6101	12.1053	7.30378	15.2463	10.4115	12.8148	11.605	12.2122	12.4856	12.1036
						TCGA-BRCA	TCGA-BH-A0BF	1	1324	white	56	0	1	11.388	10.3729	11.2784	9.08481	11.3674	11.6861	13.072	10.744	11.1867	9.41574	12.5132	12.4663	11.227	4	10.9549	12.2061	12.1264	8.91289	11.1033	12.2046	13.0607	8.5157	8.70736	9.67772	11.4873	8.16491	15.8935	10.2009	11.7372	11.1306	12.8696	13.2102	11.4574
						TCGA-BRCA	TCGA-AR-A2LH	1	616	white	55	0	2	11.6922	8.62205	11.0974	9.02237	10.5048	11.4813	12.006	10.2252	10.5622	10.4083	11.5367	11.7091	12.247	4.58496	10.1997	11.4919	10.2216	10.007	10.7616	11.1649	12.384	9.59805	7.43463	9.81057	11.2378	8.50779	15.4798	9.42206	12.1098	11.2015	12.8874	12.4628	11.2527
						TCGA-BRCA	TCGA-AQ-A7U7	1	584	white	55	0	2	10.9556	9.69174	11.1923	9.96434	11.3587	11.2697	12.2972	10.93	10.7632	7.77479	11.7582	11.8834	11.3641	5.12928	10.3542	11.8765	10.6812	8.98584	11.2854	11.6156	12.0272	9.66534	9.45121	9.99294	11.5241	8.29462	15.0739	9.92184	11.8591	10.3332	12.1033	13.6879	11.1749
						TCGA-BRCA	TCGA-BH-A1ET	1	2520	white	55	0	1	13.4974	8.20457	10.9218	8.76818	11.2095	11.5177	13.4628	11.4346	12.0481	10.1799	13.3604	13.3648	13.9801	0.01	11.0112	12.5299	11.7694	9.61287	11.1215	12.4543	14.1997	9.90539	10.4336	11.0161	11.719	9.03892	16.2802	11.4939	13.3656	10.3083	13.1998	10.5774	10.5196
						TCGA-BRCA	TCGA-B6-A0X0	1	3945	white	54	0	1	10.6239	7.91886	9.91886	6.83289	10.0941	11.3869	12.5372	9.47573	10.2644	8.84235	11.6715	11.8754	11.6211	0.01	10.1997	11.1972	10.9915	6.91886	9.59619	10.8162	12.8519	6.44294	6.42626	7.70044	9.7039	5.52356	14.3906	9.85487	12.3298	9.96723	12.3614	11.5023	12.2207
						TCGA-BRCA	TCGA-AR-A0TY	1	1699	white	54	0	1	12.3083	7.59991	10.3004	10.4221	11.5901	12.5957	12.8891	10.9658	11.9192	11.4163	13.5509	13.3941	14.1562	2.32193	12.0358	13.0748	11.4599	9.30834	11.0587	12.74	13.7423	8.81698	8.59246	8.78136	10.8948	7	17.4309	11.1605	13.5287	14.0237	13.3136	11.5127	11.1293
						TCGA-BRCA	TCGA-A2-A0EW	1	1884	white	53	0	2	11.8792	7.96578	11.275	12.1273	10.9737	11.5694	12.3233	10.7279	10.7322	8.60363	12.1128	12.145	12.1092	4.16993	9.99577	11.6978	10.5177	10.8517	10.2515	11.5221	12.5454	10.9352	10.236	11.3242	11.0042	8.96	15.5873	9.98584	12.2571	9.81057	12.5299	11.5377	11.0112
						TCGA-BRCA	TCGA-BH-A1F2	1	959	white	53	0	2	13.3637	9.04166	10.3387	10.5575	9.81057	11.0539	13.9276	11.7707	11.6751	10.1202	12.3701	13.2383	12.8368	0.01	12.0172	11.5599	13.3796	9.63481	11.6502	12.3666	14.3452	9.55267	10.3587	11.0098	12.1176	7.79442	15.5053	11.3426	13.6414	12.9526	14.4308	10.6724	10.7313
						TCGA-BRCA	TCGA-E9-A1N6	1	678	white	52	0	1	11.1222	8.5157	9.84862	6.37504	10.7322	12.346	12.658	10.2033	10.5401	10.3837	11.9218	12.6817	10.2992	0.01	10.2981	11.927	10.8486	8.12412	9.97871	11.4783	13.081	7.67243	8.54689	8.99718	11.7636	7.24793	16.0819	9.6987	12.7132	11.5411	13.4756	11.6524	10.3707
						TCGA-BRCA	TCGA-BH-A1F6	1	2965	white	51	0	2	10.9564	8.90087	11.381	5.90689	10.2288	11.8846	12.116	10.3253	10.5971	9.92778	12.5551	12.4747	12.8905	10.1319	11.464	13.0843	11.2627	7.59246	11.4486	12.5384	12.8994	7.29462	7.27612	8.53138	11.286	7.54689	15.7646	10.2167	12.3507	12.4136	13.8259	11.9506	11.3095
						TCGA-BRCA	TCGA-BH-A18L	1	811	white	50	0	2	11.8553	8.09803	11.421	13.4402	11.1624	12.3429	12.9097	11.941	11.0908	8.22882	12.4157	12.4821	12.908	0.01	11.8142	11.672	12.9638	9.07414	11.1755	12.2796	14.0711	9.77149	8.48784	10.207	12.2225	6.71425	15.2983	11.5314	13.368	12.9649	13.414	12.1215	13.0588
						TCGA-BRCA	TCGA-AR-A1AR	1	524	white	50	0	2	11.9876	9.84235	12.8872	8	12.1749	11.7151	13.604	12.5894	11.8937	8.98584	14.5023	14.1517	12.1209	2.80735	12.7288	13.0251	11.5845	9.84862	11.9954	13.4231	15.2676	9.32867	9.99152	11.2246	12.2061	7.35755	15.6548	12.6902	14.2326	13.5813	14.4161	11.769	13.2166
						TCGA-BRCA	TCGA-B6-A0IG	1	4456	white	50	0	1	9.9629	9.13443	10.7797	9.41151	10.6952	13.3426	13.9391	10.5859	11.7574	10.1485	11.9972	12.4234	13.058	3.80735	12.0931	13.5864	13.539	8.85175	11.4848	12.0327	14.287	8.53138	8.224	10.567	11.8214	6.76818	16.8525	10.9001	13.3105	11.8584	14.1819	12.6786	11.6755
						TCGA-BRCA	TCGA-BH-A18R	1	1142	white	50	0	1	12.6366	8.44708	11.2149	8.96	11.6777	13.0296	13.2512	11.4388	11.0895	10.5488	12.9377	14.1405	14.3603	1.58496	11.395	12.7674	13.1821	8.45121	11.0244	12.0997	14.5133	8.99718	8	10.1923	10.5774	9.16742	16.3876	12.3385	13.5639	13.3761	14.0251	12.192	12.3904
						TCGA-BRCA	TCGA-AO-A0J5	1	792	white	48	0	2	11.7009	9.12412	11.2137	13.4491	11.3454	12.6227	12.9855	11.5971	11.0478	10.1344	12.0279	12.3485	14.3383	2	10.7056	12.2726	10.5831	10.4727	10.4179	11.6119	13.0952	10.1111	10.585	10.9344	11.9043	8.05528	16.3317	10.5971	12.5435	11.6555	12.9028	12.5488	11.4062
						TCGA-BRCA	TCGA-AC-A2QJ	1	446	white	48	0	2	8.96867	11.6225	9.69174	5.08746	12.4442	13.5843	11.6883	7.49185	11.7838	7.31288	10.8978	10.7372	9.79116	1	10.0265	13.1696	12.7326	9.70217	8.3837	10.9578	11.7903	8.99435	8.19967	6.84549	9.38802	8.77149	16.6586	8.35315	10.3987	10.5527	12.8364	14.0805	10.8773
						TCGA-BRCA	TCGA-B6-A0X1	1	7455	white	48	0	1	11.8126	8.65821	13.3502	5.97728	10.0014	11.3674	11.9028	10.5708	10.6909	9.82972	12.0293	12.2641	11.4247	4.9542	11.8412	12.2834	11.8142	7.40088	11.2161	12.1991	12.9114	8.51964	9.41785	8.14466	10.0914	6.42626	15.8188	10.5793	12.2712	12.0351	13.7115	12.5543	12.0389
						TCGA-BRCA	TCGA-BH-A208	1	1759	white	48	0	1	12.1833	9.5216	11.1196	7.7879	11.0821	11.0728	11.7875	9.66711	10.6917	10.1997	11.1855	11.7599	11.3592	5.58496	10.115	11.7372	10.5527	9.87036	9.90989	10.8486	12.952	9.42626	11.1812	11.2842	11.1662	9.60363	15.7566	9.81378	11.5713	10.8178	13.4087	10.7099	10.8361
						TCGA-BRCA	TCGA-BH-A18V	1	1556	white	48	0	1	10.2527	8.89178	12.7341	7.47573	11.5817	12.7249	13.166	10.6698	12.2863	8.73809	12.7733	14.1055	11.8757	3.16993	11.7899	13.8499	12.431	9.59432	11.2837	12.9088	13.4542	8.14466	8.17991	9.07414	13.0577	6.42626	16.4725	10.8478	12.6348	12.6248	13.7063	13.1062	13.35
						TCGA-BRCA	TCGA-AR-A0U2	1	2551	white	47	0	2	11.8803	8.52748	11.1941	6.84549	10.7944	10.9174	13.4838	12.6396	11.7402	11.4517	12.7035	12.8971	14.0706	4.24793	10.9337	12.4179	11.4404	8.7211	12.0539	12.2345	14.5037	8.86728	8.50779	10.4263	12.6348	8.35315	16.127	12.513	14.0782	13.8259	13.5804	11.9589	12.7004
						TCGA-BRCA	TCGA-BH-A1FH	1	1034	white	47	0	2	12.0637	8.43879	12.137	11.811	11.611	12.0539	12.3357	10.9873	11.0681	9.51175	12.0885	12.5927	13.2879	2.80735	10.5498	12.0868	11.8657	10.8017	10.769	11.5358	13.0504	10.9958	10.3129	11.9001	11.2562	10.5265	15.9725	10.4737	11.933	8.92481	12.9091	10.9701	11.4404
						TCGA-BRCA	TCGA-GM-A2DA	1	6593	white	46	0	1	9.9263	8.01123	8.22882	9.96723	9.27612	10.8106	10.5324	8.98868	10.3163	9.24555	9.84235	10.4828	11.7134	2	9.79442	11.2088	12.2946	8.33092	9.03067	10.1923	11.6271	8.26209	7.85175	8.73471	10.2796	5.2854	14.1109	8.30378	9.73302	9.67596	12.3078	10.6777	9.87344
						TCGA-BRCA	TCGA-BH-A18K	1	2763	white	46	0	1	11.6869	9.69349	9.81858	9.16239	10.7789	12.4826	13.0481	10.3891	11.5722	8.18488	12.0634	12.5736	12.2874	1.58496	11.7964	12.4648	12.3357	9.29232	10.9211	11.9748	13.357	8.86728	9.42836	10.4105	10.9972	7.25739	15.3852	10.2842	12.6046	10.8321	13.4652	10.9658	11.944
						TCGA-BRCA	TCGA-B6-A0I8	1	749	white	46	0	1	11.6384	10.0782	11.2784	12.4836	10.8742	11.2167	12.7243	10.4747	10.8281	10.4221	11.9498	12.509	11.9513	1	10.8202	13.4736	12.1488	9.17243	10.8657	11.4858	13.4112	9.40301	8.57365	10.7039	11.6861	7.33092	15.2415	10.744	12.3318	10.8634	13.0104	10.6202	11.8349
						TCGA-BRCA	TCGA-E9-A226	1	1048	white	45	0	2	11.1731	9.50978	10.1059	6.9542	10.9054	10.3955	13.4189	11.357	11.1144	9.60363	12.0185	14.4495	12.6569	0.01	10.8202	11.6729	10.9979	7.65105	11.3032	11.5661	13.9525	6.37504	9.32867	10.0485	11.158	7.43463	15.6476	11.3129	13.1978	12.3346	12.9176	10.733	12.0835
						TCGA-BRCA	TCGA-BH-A1EV	1	365	white	45	0	2	11.2246	8.65821	9.37287	9.93221	11.0775	11.4635	12.8317	9.98299	11.0775	9.85331	12.7828	13.1699	13.9347	2	11.275	11.1599	10.4909	8.53138	10.5421	11.4471	13.5159	7.58496	8.66178	8.81378	10.7022	5.42626	16.7825	9.88264	13.0035	12.0815	12.4898	12.1759	11.9462
						TCGA-BRCA	TCGA-AR-A256	1	2854	white	45	0	1	11.9136	9.21917	12.8174	6.24793	11.8202	11.7292	13.2076	11	11.8357	7.21917	13.0549	13.9105	13.3327	1.58496	11.668	14.06	12.711	7.30378	11.3761	13.36	13.7973	7.17991	8.04985	10.6008	12.9344	5.55459	15.7409	11.3168	13.6141	12.3622	14.2435	11.7891	13.7113
						TCGA-BRCA	TCGA-BH-A1FM	1	1388	white	44	0	2	12.4497	8.18488	9.26209	6.40939	9.79604	11.5172	12.8929	12.5093	12.1039	9.42417	12.2952	13.0396	12.3112	2.80735	13.0439	10.1098	10.8463	7.10852	11.9676	11.9028	15.2981	7.3837	9.08481	10.4888	11.6653	7.14975	15.2485	12.4171	13.6763	13.345	14.2541	8.45533	10.9887
						TCGA-BRCA	TCGA-BH-A1FU	1	1688	white	44	0	1	11.395	8.79766	10.8455	8.12412	11.2515	12.3228	12.4954	10.623	10.3554	9.77314	12.676	12.2076	11.9421	3.70044	9.87036	12.0074	10.1997	9.65642	9.91439	11.1749	13.7879	9.21675	9.79604	10.7863	12.1963	8.19476	16.2016	11.0888	12.4737	11.9965	12.5187	11.8166	11.5817
						TCGA-BRCA	TCGA-AR-A0TZ	1	3262	white	43	0	2	12.263	8.16491	11.346	6.72792	11.6887	11.5454	13.5446	12.2375	10.643	8.88264	11.817	13.6692	13.453	1.58496	11.1039	12.4354	11.4903	7.89482	11.6152	12.2201	14.5461	8.29462	8.42626	13.7704	11.2125	7.84549	16.0189	11.7793	14.3385	11.6344	13.328	11.9028	11.7069
						TCGA-BRCA	TCGA-B6-A0WY	1	3461	white	40	0	2	11.1655	9.45738	11.2819	11.2222	11.2644	13.3955	12.991	10.2773	11.2848	9.61839	12.4049	12.5606	12.2137	2	11.1222	11.9035	12.0974	9.40727	10.9894	11.8941	13.2105	8.68299	8.97154	11.9046	11.403	8.06609	16.2243	10.3815	12.3853	11.368	13.8441	13.7142	11.927
						TCGA-BRCA	TCGA-E9-A1RB	1	976	white	40	0	1	12.9317	10.3219	12.1812	6.32193	11.31	12.4388	13.1654	11.8447	12.0255	9.62753	13.2469	14.1438	12.1827	3.45943	13.009	13.1157	12.8819	8.66534	11.7254	13.4325	15.4707	7.43463	8.07682	9.77808	12.7358	7.2854	17.2869	12.4062	14.6171	12.8891	13.7993	11.7773	13.4415
						TCGA-BRCA	TCGA-BH-A18M	1	2207	white	39	0	2	11.7198	8.35755	11.0987	9.04985	10.93	9.64926	12.9196	10.4625	10.8757	9.44087	12.3937	12.5661	11.6987	2	11.0802	11.7703	11.0355	9.75989	10.9469	11.6843	13.3411	9.9901	9.10329	12.5755	10.8186	8.31288	15.9773	10.3977	13.0196	10.9293	12.5152	11.5157	10.8345
						TCGA-BRCA	TCGA-A2-A04V	1	1920	white	39	0	1	10.8226	8.70736	10.3231	9.32867	10.4263	11.6707	12.1286	10.5868	11.5083	8.10852	11.5073	11.9564	13.328	1	10.6156	11.6466	11.2761	9.32643	10.7448	11.7254	13.4637	9.02237	7.89482	12.8617	10.8098	6.58496	15.0339	10.007	12.0175	10.0553	13.5399	11.1202	11.0382
						TCGA-BRCA	TCGA-B6-A0RS	1	3063	white	38	0	1	12.178	10.7211	10.8368	7.18982	11.1447	11.9073	13.3383	11.5957	11.5722	10.941	12.5833	13.5637	12.9185	2	10.9794	13.8351	13.0876	8.85175	11.8435	12.6282	14.6788	8.10852	8.73132	10.1997	11.8541	6.32193	16.5022	11.7279	12.7052	12.8717	13.7412	12.8757	12.204
						TCGA-BRCA	TCGA-BH-A1EW	1	1694	white	38	0	1	11.5147	9.48583	11.6407	10.9039	10.66	11.4372	12.158	11.0815	10.4898	8.44294	12.1948	13.7861	11.8876	1	11.2923	11.5211	11.741	9.93517	10.9658	12.3636	13.8611	9.10329	11.0795	10.3038	10.7022	9.40727	15.3486	11.6852	12.8537	11.7731	13.2058	13.2688	12.0011
						TCGA-BRCA	TCGA-BH-A1ES	1	3462	white	35	0	1	10.2216	6.88264	9.51373	5.16993	9.53528	10.7313	11.2917	10.0755	9.98014	7.99435	11.1768	11.0238	10.1383	0.01	9.83289	10.1447	9.32643	5.55459	9.54496	10.6357	12.1954	6.12928	7.85175	11.1421	10.3597	5.75489	14.5158	9.45121	11.8098	10.6935	12.1137	8.31741	9.99718
						TCGA-BRCA	TCGA-BH-A1FN	1	2192	white	34	0	1	12.3677	8.94544	10.3923	6.08746	10.268	11.8226	12.151	11.4126	10.6466	9.28309	12.2192	12.7153	12.6346	3.16993	11.0175	10.7903	11.2282	7.50779	11.1131	11.6653	13.9627	7.33092	9.00562	13.3468	11.1098	6.89482	15.6165	11.6289	13.0028	11.3061	12.8457	10.6768	11.9185
						TCGA-BRCA	TCGA-BH-A1FE	1	2273	white	31	0	1	11.9556	9.10591	11.5299	11.5216	11.021	11.5551	13.3704	11.6826	11.3592	10.1662	13.1566	13.5098	12.4926	3.70044	11.3304	12.42	11.7356	8.67243	11.4136	12.4291	14.4359	9.68825	9.93664	11.6671	12.4168	10.0375	15.8594	11.4424	13.6681	12.4551	13.0358	10.6294	11.4476
						TCGA-BRCA	TCGA-AR-A24L	1	2866	white	26	0	1	12.0248	9.91439	11.9912	8.54689	11.8529	11.6537	13.2475	12.1312	11.656	9.21917	12.6669	13.2744	14.6895	0.01	12.8659	12.0272	12.4147	9.23362	11.3891	12.0878	14.1082	9.50184	10.5294	11.8364	10.8376	8.43879	15.9692	11.8556	12.4497	12.3035	13.3323	10.6812	11.6702
						TCGA-BRCA	TCGA-AC-A3W6	0	602	white	90	0	2	11.1241	9.31741	11.2837	9.71425	11.4152	11.7977	11.9575	10.4388	11.117	10.2935	11.137	11.6165	11.9944	3.58496	9.9571	13.0081	9.98726	9.99859	9.90087	11.0775	12.268	10.5196	9.224	9.83131	10.8696	7.64386	15.8727	9.2854	11.7474	11.2732	12.8681	13.5675	11.1299
						TCGA-BRCA	TCGA-A2-A25D	0	552	white	90	0	2	12.0735	8.82337	11.1491	12.7037	11.2883	12.3592	13.3652	10.7944	11.2264	5.39232	12.5177	12.3365	12.8323	3.58496	11.4025	12.6133	13.1103	9.43045	11.5575	11.7091	14.083	10.0661	7.62205	12.1402	11.4599	8.43879	15.6444	10.6627	12.7004	11.1351	13.8496	13.0016	11.7134
						TCGA-BRCA	TCGA-LL-A6FP	0	677	white	90	0	1	11.6768	7.31288	8.16491	7.7211	11.3197	13.5693	13.1841	9.90839	12.4755	10.3421	11.8427	12.1799	12.8007	0.01	10.9542	14.3289	12.3512	8.02791	10.5793	11.3592	12.9254	7.85175	4.24793	7.53138	10.7389	5.52356	15.4453	9.61102	12.2685	8.87036	14.3096	12.3907	11.4268
						TCGA-BRCA	TCGA-D8-A1JK	0	612	white	90	0	1	11.66	8.30834	10.0993	4.64386	11.0369	12.3883	12.8339	10.2288	11.3912	11.4168	11.5868	12.3418	14.4842	3.80735	10.8361	12.7979	10.611	8.71425	10.4157	11.7245	12.6558	7.67243	8.13955	8.73132	11.0694	6.79442	16.8956	9.17742	11.7377	12.6253	13.0926	13.6389	10.4676
						TCGA-BRCA	TCGA-AN-A0FK	0	213	white	88	0	2	11.1497	8.40088	10.3934	4.16993	10.4584	11.8086	12.6931	10.5216	10.5812	10.0279	11.7457	12.8761	13.6761	6.14975	11.7091	12.4747	11.8669	8.59619	10.6008	11.4512	12.7653	7.88874	8.23362	8.86728	10.6439	6.85798	15.7817	10.1085	13.2073	11.1026	13.3703	11.7444	10.2703
						TCGA-BRCA	TCGA-D8-A73U	0	492	white	88	0	1	10.3421	9.61102	10.7632	6.97728	10.8788	11.0451	11.7142	10.0593	10.4367	9.25503	11.2597	11.3625	12.0067	4.39232	10.0607	11.7557	10.1111	8.60733	9.96723	10.5275	11.056	9.46557	8.69697	8.67596	11.3619	6.80735	15.1661	8.70736	11.2473	9.43045	12.1966	14.0626	10.1176
						TCGA-BRCA	TCGA-AC-A3HN	0	496	white	87	0	1	11.9248	9.83447	11.8861	12.0417	11.8967	12.1709	12.8168	10.8202	11.5294	9.29692	12.3688	12.5401	12.3256	4.16993	10.5708	12.7115	11.3837	11.1215	10.5343	12.0417	12.9061	10.9204	9.70044	10.7202	11.3242	8.67596	16.563	10.3794	12.7322	11.432	12.6393	12.9022	11.6944
						TCGA-BRCA	TCGA-D8-A1XG	0	448	white	86	0	2	11.3945	7.45121	10.3476	7.81378	10.4615	11.6555	12.6259	10.4808	10.4919	10.0539	12.0671	12.4094	13.8752	3.16993	11.3691	11.7574	10.8025	7.48382	10.5147	11.6357	12.3786	8.70044	8.74147	9.81538	10.3253	6.33985	16.2143	9.63118	12.656	10.7499	12.6239	11.8178	12.1124
						TCGA-BRCA	TCGA-E9-A54X	0	727	white	85	0	1	11.1	7.06609	9.60918	3.80735	10.1861	12.4767	11.7993	9.70908	11.2709	9.87958	11.3253	11.4263	13.3386	0.01	11.224	11.9741	11.5474	5.49185	10.6439	11.5333	13.5033	5.9542	5.64386	7.92481	10.3083	5	17.2059	10.4959	11.5333	11.5401	12.6959	10.6147	10.062
						TCGA-BRCA	TCGA-A2-A1G1	0	584	white	85	0	1	11.9596	9.17742	11.0451	6.04439	10.9708	11.4893	13.3485	11.4979	11.6869	8.86109	13.6287	13.7705	13.6533	5.58496	12.7461	11.5651	11.5507	9.61655	12.3055	13.2461	14.236	8.3443	9.37938	10.683	12.3004	7.15987	17.0461	11.4424	13.6165	12.5627	14.7099	12.654	12.6821
						TCGA-BRCA	TCGA-AO-A1KQ	0	1882	white	84	1	2	10.0701	9.76487	10.0348	4.70044	10.3004	12.571	12.8713	10.3576	11.4341	11.0721	11.4676	11.8826	10.7347	0.01	11.2946	12.1749	13.0649	7.37504	11.3548	11.8982	13.9858	7.12928	7.09803	11.6184	11.0244	5.49185	15.6661	10.6027	12.5474	11.6542	13.39	11.6874	10.8903
						TCGA-BRCA	TCGA-AQ-A1H2	0	475	white	84	0	2	12.7926	9.18488	11.9465	11.8634	11.8341	12.0539	13.9861	10.8549	11.9633	7.8009	12.4886	13.1548	13.8587	1.58496	12.5223	11.902	11.8849	7.54689	12.2565	12.0063	13.9659	7.90689	7.33985	7.76155	10.9484	7.74819	16.334	10.6303	11.9858	10.3197	12.9981	13.9015	10.9527
						TCGA-BRCA	TCGA-LL-A50Y	0	762	white	84	0	1	11.0327	7.64386	8.72792	11.7296	10.5718	12.0081	12.1072	9.10852	11.3614	9.24555	10.9972	10.9374	11.0238	0.01	8.86728	12.0375	11.4964	8.29462	9.60363	11.4173	11.8537	7.36632	5.83289	6.67243	9.36851	5.24793	15.7492	8.74483	11.6257	10.1215	12.9317	12.3024	10.6393
						TCGA-BRCA	TCGA-AC-A2B8	0	677	white	84	0	1	12.8327	9.12153	11.1567	11.7065	11.4778	11.9719	13.4975	11.1209	11.032	9.16491	12.7343	12.7119	12.7345	4.45943	11.3641	12.8459	11.4357	10.8463	11.1768	12.0583	13.5993	10.8178	9.64746	10.5887	11.4378	8.03342	16.5945	10.978	12.9394	10.3287	13.0599	12.9832	12.7112
						TCGA-BRCA	TCGA-D8-A1XV	0	461	white	84	0	1	11.9586	6.93074	10.7099	4.80735	10.1319	11.1762	12.1564	10.3231	10.643	9.11114	11.9851	12.5727	11.6165	3.90689	11.1376	10.3038	11.2444	7.12928	10.4656	11.3332	13.5857	6.82018	7.67948	8.62571	9.41996	7.45943	15.6057	10.8727	12.7095	10.9816	12.6996	10.4315	11.7855
						TCGA-BRCA	TCGA-AR-A1AJ	0	3072	white	83	0	1	11.3326	9.92481	11.937	8.33092	11.8285	12.1815	12.8192	11.4067	11.0566	10.0888	13.8194	13.1818	11.752	4.08746	11.3641	12.5941	11.1131	9.99435	11.2107	12.1972	13.553	9.08746	7.91886	9.21917	12.3622	8.03892	15.5819	11.0701	12.8591	11.858	13.4804	12.6555	12.5904
						TCGA-BRCA	TCGA-BH-A0H6	0	747	white	82	0	1	11.2414	7.27612	9.89633	7.11894	10.769	11.431	13.2363	10.1163	11.0334	9.05257	11.5464	12.2327	12.0464	1.58496	10.3923	11.9858	11.2562	8.66534	10.6175	11.4803	12.875	8.28077	9.23362	11.7279	12.0074	6.90689	15.2765	10.2715	11.9241	8.54689	13.1223	11.0244	10.6421
						TCGA-BRCA	TCGA-BH-A0WA	0	701	white	82	0	1	11.1478	8.45943	11.9787	8.57365	11.4414	12.1456	12.4107	10.6502	11.5411	10.021	12.8675	14.5297	13.0918	4.70044	11.7296	12.5653	11.8416	8.21917	11.0049	12.3767	13.264	7.31288	9.48985	10.3219	12.5828	6.52356	17.3672	10.6935	13.3134	12.2037	12.6237	11.8186	11.8065
						TCGA-BRCA	TCGA-D8-A1X5	0	565	white	81	0	2	10.058	8.66534	10.774	12.8343	11.1874	12.007	12.6749	11.3756	10.8463	8.75489	11.643	12.8999	12.9908	1	10.6248	11.2015	11.0272	6.79442	10.0168	10.9491	12.7895	7.27612	7.98299	11.0735	11.2204	6.20945	16.1699	9.70908	12.3267	10.9106	11.858	13.6204	11.5387
						TCGA-BRCA	TCGA-D8-A1XZ	0	466	white	81	0	2	12.1861	8.69697	10.0768	6.80735	11.888	13.3794	13.2211	11.4173	11.3805	8.2854	13.0946	12.7719	13.5124	1.58496	12.4168	12.9715	13.9502	7.22882	11.8142	11.8435	15.2434	7.73471	8.59246	10.5784	13.2637	6.83289	15.7715	12.3487	13.0497	11.842	14.0891	12.1997	11.969
						TCGA-BRCA	TCGA-BH-A0HK	0	178	white	81	0	1	11.1966	7.60733	10.9629	8.37938	10.2336	10.9469	12.513	10.8788	10.6724	8.56605	11.5854	12.1636	13.0222	1.58496	10.9039	11.9542	10.8719	10.1787	11.8661	11.1	13.3697	9.88417	8.72451	10.0028	9.43463	8.51964	15.3048	10.4838	11.811	10.6689	13.6638	11.2318	11.1033
						TCGA-BRCA	TCGA-BH-A18G	0	149	white	81	0	1	9.67772	8.31288	9.83605	4.32193	10.4645	12.7653	12.1621	9.24317	10.933	9.98726	11.2946	11.6764	12.1283	2.80735	11.1523	11.1312	11.3476	5.49185	9.95128	10.9908	12.8078	5.9542	7.03342	10.352	9.96723	6.30378	15.8855	9.47978	11.1917	11.5632	14.019	10.5831	12.8124
						TCGA-BRCA	TCGA-D8-A1JN	0	620	white	80	0	2	12.0238	6.79442	8.29462	7.45121	11.0471	10.8329	12.2429	8.79116	10.9993	9.49586	11.4346	12.4571	12.1567	1	9.08481	12.4089	9.80896	7.16993	9.93221	11.3044	13.4094	8.08215	6.35755	8.3443	10.1163	6.32193	15.4814	10.1911	11.8757	9.76984	13.2741	10.2384	10.6715
						TCGA-BRCA	TCGA-D8-A1X6	0	541	white	80	0	2	12.4815	8.26679	11.4357	14.4192	11.0451	12.2712	14.0452	11.584	11.6515	7.55459	12.6298	13.2659	12.5013	0.01	11.9418	12.233	12.3993	8.04985	11.2685	12.5934	14.3175	7.88264	7.37504	9.61839	12.0084	6.96578	16.0962	10.9031	13.2219	11.6375	13.2834	12.374	11.7095
						TCGA-BRCA	TCGA-AR-A1AP	0	2856	white	80	0	1	10.6073	8.47573	11.5718	10.0688	10.3902	11.7553	12.3939	10.4126	10.8803	9.36851	11.6083	12.1219	11.5845	3	10.2095	12.0358	10.8455	8.83289	10.3026	11.6839	12.3966	8.2384	7.46761	8.45121	10.9972	6.53916	16.1396	10.0688	12.3688	11.6147	12.4916	12.7313	11.3202
						TCGA-BRCA	TCGA-OL-A66J	0	1996	white	80	0	1	11.3597	8.79116	10.7624	10.2348	10.6421	11.6248	12.7846	10.4325	11.2348	8.01681	11.2969	11.1799	11.7271	1.58496	10.6777	12.3301	11.0715	11.2143	10.8478	11.3032	12.7237	10.4357	8.39232	13.5183	9.70217	7.87036	14.7054	9.35975	11.7305	9.12412	12.8872	11.446	10.8408
						TCGA-BRCA	TCGA-E2-A1IH	0	1026	white	80	0	1	11.1163	9.7364	10.2935	8.24317	10.4512	11.7964	12.9478	11.3415	11.1131	8.47573	12.2866	12.8893	11.5172	2.32193	12.1895	11.7465	12.0464	8.8392	11.3471	12.3567	12.7826	8.86109	9.81378	12.2164	11.3449	8.29002	15.3309	9.89178	12.5589	11.2282	13.5264	10.9887	11.4959
						TCGA-BRCA	TCGA-A2-A0EV	0	968	white	80	0	1	11.7237	7.93664	10.3432	7.97728	10.813	11.2538	13.0703	10.8918	10.6555	8.87652	12.0265	12.4635	11.2568	2.80735	11.1059	11.7043	12.0151	8.87036	10.6092	12.0688	12.8659	9.02791	8.65821	10.0307	10.6812	6.26679	16.4468	10.42	12.6939	11.1911	12.9151	12.6268	10.8345
						TCGA-BRCA	TCGA-D8-A145	0	410	white	80	0	1	11.4131	7.87652	10.8857	9.53138	10.9643	11.7121	12.2276	10.8384	10.4553	8.76155	11.8029	12.284	13.9262	4.16993	10.0848	12.3641	10.3641	10.0715	10.4398	11.2639	13.025	10.062	9.55842	10.84	10.7607	8.61471	15.155	10.5275	12.0283	9.55651	12.1883	11.5435	11.0681
						TCGA-BRCA	TCGA-EW-A1IW	0	371	white	80	0	1	12.255	8.59246	11.7528	12.375	10.7004	12.1988	12.8863	11.6506	11.5255	8.76487	12.7659	13.3636	13.3177	2.32193	12.2174	11.683	11.8715	10.021	11.3987	12.136	14.1684	9.22641	9.29232	11.623	10.6891	8.37938	16.2259	11.5187	13.6829	12.5708	12.7394	12.0967	12.1199
						TCGA-BRCA	TCGA-E2-A14P	0	1246	white	79	0	2	11.117	9.49185	10.128	8.91886	9.0954	13.1545	13.6159	11.3304	11.1861	12.0529	12.2906	11.8595	12.5885	1.58496	10.8033	13.3059	11.4152	9.09803	9.71768	12.3451	13.7106	8.64386	6.6865	9.00562	10.2216	6.65821	16.5893	10.6312	12.3429	13.8162	13.5468	12.6341	10.8463
						TCGA-BRCA	TCGA-LD-A74U	0	402	white	79	0	2	11.1561	8.97441	11.3354	9.14466	11.1978	11.676	11.9233	10.1357	10.8525	10.6627	11.5684	11.9414	12.9136	2.58496	10.2372	12.478	10.2515	10.3815	10.2527	11.2461	12.4919	10.5078	9.18735	10.4284	10.7056	8.26209	15.4506	9.50581	12.0563	11.3387	13.1236	12.7797	11.1059
						TCGA-BRCA	TCGA-D8-A1JF	0	366	white	79	0	2	14.0666	7.87652	9.58308	6.14975	10.5699	11.9524	13.618	10.6257	11.0341	8.75822	12.2098	13.0536	10.5897	3.90689	11.3174	12.6834	11.4949	7.65105	11.3253	11.7039	13.5375	8.18982	8.85175	9.59619	12.9168	6.08746	14.7652	10.6439	12.551	11.117	13.0773	10.3376	11.8642
						TCGA-BRCA	TCGA-AC-A2FG	0	1853	white	79	0	1	12.5379	7.69349	11.697	10.3554	11.4284	11.9061	12.8033	10.8956	11.7423	10.0941	12.4273	12.7194	12.6398	3.70044	10.9144	11.8576	11.0934	10.2691	11.4341	11.8478	13.3436	11.204	9.26209	11.3044	11.0492	9.11114	16.5419	10.5038	12.3106	9.90238	13.4596	12.2294	12.3038
						TCGA-BRCA	TCGA-BH-A0E7	0	1363	white	79	0	1	12.4003	7.75489	10.043	10.5584	11.0258	10.8803	13.7574	10.5008	11.2064	7.64386	12.3306	12.5287	13.1084	0.01	10.0634	12.3669	11.1699	8.14466	10.6537	11.8576	13.4942	7.77479	9.30378	12.1988	11.7818	7.12928	16.1828	10.9024	12.4587	10.1573	12.2903	10.5285	11.4883
						TCGA-BRCA	TCGA-E2-A105	0	1308	white	79	0	1	11.4737	7.30378	11.0028	11.0627	8.56605	12.9451	12.8681	11.23	11.6022	11.0478	12.0116	12.4383	12.9697	1	10.973	12.5421	12.4954	8.47168	12.0276	11.4284	13.7863	8.13443	7.07682	11.3701	13.1051	8.10329	15.6981	11.2348	12.9339	12.2058	13.8662	11.585	11.2318
						TCGA-BRCA	TCGA-A7-A0CH	0	1079	white	79	0	1	11.8126	7.34873	9.84392	5.75489	10.3696	10.8796	12.7145	10.5324	10.8001	9.56796	12.2533	12.2834	13.2216	3.70044	10.6221	11.2186	10.8564	7.07682	10.5147	10.96	12.7875	6.87036	8.53138	9.68475	10.1599	6.74147	16.023	10.2276	12.5311	10.3891	12.726	11.2912	11.1241
						TCGA-BRCA	TCGA-A2-A0EU	0	1043	white	79	0	1	11.6991	7.89482	10.6027	7.25739	10.4594	11.8467	12.5406	11.4747	10.9084	7.2854	11.5353	12.5641	12.6291	2	11.7099	11.8823	11.2969	7.72792	11.4752	12.0206	13.8429	7.67948	8.53138	13.9114	10.4707	7.21917	15.1753	11.1737	12.7875	10.2958	13.0901	10.9773	10.6519
						TCGA-BRCA	TCGA-AC-A3QP	0	675	white	79	0	1	11.6425	9.30834	11.0861	8.99152	10.9114	12.8669	12.6493	10.1241	11.821	8.96578	11.7549	11.3961	11.2137	0.01	11.0668	12.7002	12.3329	8.87958	10.1774	11.8784	12.6797	8.58871	8.26679	8.97728	11.0921	8.29921	15.6214	9.62753	11.4481	8.79766	13.5243	12.8805	11.2336
						TCGA-BRCA	TCGA-AC-A62Y	0	530	white	79	0	1	11.8642	9.05528	10.6083	7.40088	10.8788	12.2897	12.8679	10.4737	11.7719	9.83289	11.7112	11.7155	12.2955	2	11.4671	12.592	10.6909	9.3966	11.0987	11.0974	12.0286	8.59619	7.52356	10.1874	10.5746	6.20945	15.9556	9.61839	12.55	11.4242	13.2305	13.136	10.9151
						TCGA-BRCA	TCGA-A7-A3RF	0	408	white	79	0	1	11.2946	8.01123	12.0007	6.9542	12.1459	13.4387	12.7507	10.585	11.8416	10.8665	12.0427	12.2061	16.0187	1.58496	11.5699	12.9478	11.6124	9.16993	10.6092	11.1674	13.4696	8.93958	7.67948	8.74483	9.45738	8.71425	17.1665	10.3805	12.2647	10.6944	12.8946	13.327	12.1228
						TCGA-BRCA	TCGA-AN-A0AJ	0	303	white	79	0	1	11.5265	9.19476	9.91737	6.26679	10.2058	12.4202	12.8353	12.6018	11.7748	9.65642	12.6182	13.9577	13.8873	2.58496	11.463	11.8404	13.9354	8.03342	12.1771	14.735	14.0362	7.31288	7.25739	9.43254	12.8047	7.3837	16.5658	11.5241	14.1051	12.9735	14.269	12.6801	12.0196
						TCGA-BRCA	TCGA-E2-A14W	0	974	white	78	1	1	10.8106	8.45943	9.88264	5.67243	10.5459	11.7694	12.6893	11.0954	11.8731	9.59432	11.585	12.5632	11.9451	1.58496	12.1583	11.9622	12.8566	6	11.1241	12.0593	14.4651	5.90689	6.02237	8.11374	11.7185	5.20945	16.1139	11.2342	12.1131	11.3021	12.6043	9.01959	11.9567
						TCGA-BRCA	TCGA-E9-A3Q9	0	1001	white	78	0	2	12.3334	8.37938	11.0437	9.65642	10.9858	12.0098	12.4471	10.8162	11.1434	11.0974	11.6046	12.1257	12.1558	2	11.0815	11.6321	10.6546	11.0314	10.3163	11.5425	13.2278	10.444	8.56986	9.47978	10.3696	7.6865	15.2987	10.5304	11.6917	7.90087	12.4359	12.5788	10.2935
						TCGA-BRCA	TCGA-BH-A0BV	0	1519	white	78	0	1	11.2408	8.5812	10.8146	7.91289	10.7698	12.4294	12.1023	10.6821	10.2923	7.2854	12.2113	12.3346	10.7723	2	11.2556	11.8439	11.1948	8.49586	10.3174	11.432	12.6876	8.35755	8.85175	10.5343	10.3554	7.07682	15.855	9.90539	12.5226	10.1447	12.4752	13.2009	10.3015
						TCGA-BRCA	TCGA-A7-A0CG	0	1043	white	78	0	1	11.7427	8.54303	10.9965	10.8082	10.5527	11.03	12.7661	10.7237	10.7977	8.94544	12.0175	12.7891	13.0656	2.80735	9.75989	11.5003	10.2107	9.99718	10.4429	11.3669	13.238	9.79928	10.4635	11.1824	11.2167	8.55842	15.7836	10.4949	12.6271	12.3166	13.0792	11.1248	10.8757
						TCGA-BRCA	TCGA-BH-A0HI	0	620	white	78	0	1	11.9046	8.55075	10.5962	10.8337	10.5216	11.5793	12.875	10.8114	11.0688	9.37069	12.0007	12.2509	12.7408	2.32193	10.7151	10.9189	11.1649	8.64386	10.2992	11.5589	12.9809	8.73471	9.66711	9.90238	9.76653	7.20945	16.8075	9.69	12.5866	11.4083	12.695	13.4666	10.4189
						TCGA-BRCA	TCGA-AO-A1KT	0	541	white	78	0	1	11.7406	8.52748	11.381	10.4818	12.0924	12.1904	13.6372	11.0593	11.6676	8.13443	12.8226	13.0582	13.4337	1.58496	11.8525	12.7303	12.4729	7.94251	10.8956	11.8872	13.9974	7.76818	8.88264	12.5976	10.9462	8.59246	16.0253	10.5868	14.0944	11.4747	13.6018	11.6434	12.1466
						TCGA-BRCA	TCGA-E2-A1IL	0	118	white	78	0	1	11.2318	8.32643	10.1586	9.53333	10.5255	10.6618	12.7046	9.53722	10.2192	9.00843	11.679	11.8887	11.774	2.80735	9.48382	11.4003	10.3026	9.55651	9.94398	11.2691	12.4165	9.39874	8.97441	9.65105	10.5382	7.48382	16.1181	9.43045	12.0941	9.64386	11.3636	11.5459	10.5392
						TCGA-BRCA	TCGA-A1-A0SM	0	242	white	77	1	1	12.0848	8.93958	10.8114	9.63481	11.6613	11.5985	12.5941	11.3376	10.8431	9.77314	11.668	12.792	12.7202	1.58496	11.1215	12.4218	12.0077	8.52748	10.7125	11.4476	13.4087	9.67419	9.45738	9.60363	10.242	8.08746	16.5546	10.3869	12.7543	11.7661	12.3688	13.5875	12.1154
						TCGA-BRCA	TCGA-AO-A1KP	0	2953	white	77	0	1	11.6746	7.69349	9.77314	8.58496	9.53722	11.1712	13.8015	11.4126	12.3236	8.84235	12.1095	12.8736	11.8078	1.58496	12.5355	11.137	11.5859	6.08746	11.4863	13.1478	14.3953	7.09803	7.67243	15.2441	11.0947	7.35755	14.2043	11.1085	12.6463	10.3498	14.0805	7.86419	12.0144
						TCGA-BRCA	TCGA-BH-A0W5	0	1288	white	77	0	1	11.8922	8.81057	10.9344	10.6366	11.0077	12.3509	12.8291	11.062	11.1542	10.255	12.0808	12.3306	12.4112	4.9542	10.4767	12.8297	10.9469	9.36632	10.7616	11.809	13.1312	9.26444	8.33092	10.5831	12.0098	8.28077	15.8136	10.4073	12.286	10.3208	12.8786	11.0423	11.1699
						TCGA-BRCA	TCGA-WT-AB44	0	883	white	77	0	1	8.75822	8.43463	7.85798	8.07146	9.72792	11.137	12.2741	6.61471	11.0471	10.4429	10.1599	10.6348	10.8138	2	9.68475	11.5132	11.1046	7.03342	9.96867	10.4231	11.9073	7.25739	6.93074	7.14975	9.37504	4.75489	14.3946	8.10852	9.5812	4.9542	12.7324	11.128	11.0728
						TCGA-BRCA	TCGA-BH-A0HF	0	727	white	77	0	1	11.0587	9.09276	10.9016	9.21917	10.5265	12.3848	12.4359	11.0444	10.8865	9.27845	11.6689	12.221	12.1491	1	11.0735	11.8723	11.3548	9.76818	9.9571	11.2819	12.8541	9.64205	8.84549	9.61102	10.1824	7.64386	16.2388	9.92333	12.263	11.5343	13.5218	12.476	10.3729
						TCGA-BRCA	TCGA-A2-A4S0	0	706	white	77	0	1	11.5976	6.82018	10.8502	6.93074	11.0056	11.5589	11.5976	9.82814	10.5028	10.2204	11.3276	11.0701	11.7279	1	9.82337	10.6847	10.6303	7.50779	9.52943	10.9687	12.5922	8.42626	10.1434	8.49185	10.014	7.58496	15.449	9.84078	11.2592	8.42626	11.7867	12.0627	9.75154
						TCGA-BRCA	TCGA-EW-A1P5	0	703	white	77	0	1	10.9614	8.54303	10.5915	5.20945	11.0091	11.8792	12.8341	10.1573	10.6839	9.12412	12.3856	12.1447	10.5803	1	11.3055	11.605	11.4569	7.3837	11.5751	11.2837	13.0079	7.37504	6.96578	8.79442	9.7039	6.02237	16.9172	10.0553	12.4302	11.4147	12.8216	12.4828	9.86419
						TCGA-BRCA	TCGA-D8-A1J8	0	431	white	77	0	1	11.7895	8.69	10.098	5.75489	10.0265	10.7142	13.7895	11.8285	11.8891	9.41996	12.1102	13.1752	15.345	1.58496	12.3581	11.9936	9.94544	6.98868	12.3534	11.6129	13.8054	7.40088	9.1472	10.5632	12.116	8.78463	15.9732	11.1824	13.5503	14.4621	14.8652	10.4115	11.4491
						TCGA-BRCA	TCGA-D8-A1JS	0	371	white	77	0	1	12.9634	6.97728	10.4858	5	10.7168	12.3581	13.4621	9.5812	12.2633	10.3298	12.6954	12.4742	12.5529	1	10.8788	12.7634	12.8178	8.58496	10.3399	12.7222	13.8328	8.2854	6.79442	7.33092	8.29921	7.40939	16.5936	10.0795	12.5125	9.84706	13.743	12.6032	11.4157
						TCGA-BRCA	TCGA-E2-A14O	0	1359	white	76	0	2	11.0974	8.82337	8.56224	4.70044	10.062	13.1113	12.6328	9.33762	11.0607	9.96	11.7611	12.8582	11.6488	0.01	12.1892	12.0828	13.0126	7.07682	10.4009	12.5498	13.3882	6.70044	6.47573	7.75489	11.0084	5.20945	16.214	9.53916	13.0679	10.7245	13.0519	11.8301	11.2082
						TCGA-BRCA	TCGA-D8-A1XJ	0	664	white	76	0	2	12.5184	8.35315	11.3603	7.65105	11.4445	12.664	13.0519	10.9556	10.9151	9.39446	12.9179	14.225	14.0972	3	11.9076	13.0114	11.0348	8.98299	10.5498	12.1072	14.2554	7.94251	8.49985	8.8009	10.858	6.37504	17.1735	11.3146	14.2322	12.5287	13.474	10.7202	11.7789
						TCGA-BRCA	TCGA-AC-A2QI	0	588	white	76	0	2	11.2842	8.90087	11.2808	8.29921	11.4858	12.0341	12.6337	10.6724	11.204	9.62571	12.1611	11.7511	13.4459	1.58496	10.352	12.2125	11.0587	9.70563	10.0848	11.2198	12.6828	10.0334	9.35315	9.94837	10.1861	7.87652	15.9073	10.0795	12.1799	9.76653	12.5734	13.1035	12.0406
						TCGA-BRCA	TCGA-B6-A40B	0	3152	white	76	0	1	10.7022	9.77972	10.4737	7.43463	11.3146	12.7848	13.1352	9.92926	11.7419	10.0607	11.9043	12.1244	12.1053	2	11.218	12.3343	11.9487	8.18488	10.3554	11.5201	13.2018	8.10852	8.15482	8.93664	10.8665	6.56986	16.0451	10.0941	12.425	11.2306	13.2825	12.6126	12.0081
						TCGA-BRCA	TCGA-AC-A23G	0	2248	white	76	0	1	10.1447	8.85798	10.3061	8.29002	10.6448	11.245	11.0861	9.23362	9.77808	7.63662	10.633	10.8803	9.98868	2.32193	9.48382	11.1046	10.2515	8.84862	9.16491	10.1267	11.4414	9.29462	9.53722	9.46148	9.79604	6.93074	14.9462	8.71768	11.0928	9.09276	11.3832	11.7125	10.5167
						TCGA-BRCA	TCGA-A2-A0D1	0	1051	white	76	0	1	7.57743	7.56224	9.98726	5.49185	10.2058	10.96	12.3446	10.6184	11.5023	9.88111	11.7981	11.6307	12.2603	3.58496	10.2095	12.9926	12.5328	8.37938	9.55842	11.2101	14.0851	8.53528	7.21917	7.62205	12.0587	6.72792	16.1485	10.888	11.8673	11.9088	12.2405	10.4252	12.2923
						TCGA-BRCA	TCGA-E2-A15G	0	554	white	76	0	1	11.3038	7.53138	9.52748	8.74819	10.8009	11.4419	12.4073	10.1636	10.5333	8.93369	11.825	12.0331	11.9211	0.01	10.4778	11.8372	10.3945	8.224	10.1737	11.6609	12.9882	8.60733	7.76155	9.23122	10.3106	6.50779	15.1549	10.0539	12.1062	9.35755	12.4033	11.0993	11.3907
						TCGA-BRCA	TCGA-AN-A0AK	0	224	white	76	0	1	11.0161	8.2384	10.0688	6.88264	9.65821	12.1737	13.2426	11.2107	11.545	11.1941	12.8717	13.2015	14.3224	2.58496	9.76653	12.5382	12.4901	6.65821	10.7202	11.6434	14.0416	6.12928	7.39232	8.88874	10.6564	4.80735	15.8773	11.6087	13.7329	13.2237	13.4206	11.933	12.0481
						TCGA-BRCA	TCGA-AO-A12G	0	1639	white	75	0	1	12.0539	8.30378	10.2432	13.3139	11.128	12.1026	13.073	10.5285	11.1611	8.00562	12.3154	11.8918	13.1745	3	11.4455	11.8146	12.3117	9.05528	10.9196	11.6733	13.5411	9.24317	9.42836	10.941	10.584	7.37504	16.1366	10.5661	11.8754	10.1331	13.9812	12.4354	12.1267
						TCGA-BRCA	TCGA-E9-A1ND	0	1266	white	75	0	1	10.1774	9.12153	12.0098	4.52356	11.0881	12.6751	11.0987	10.1306	10.9498	9.10852	11.9683	12.5577	12.4424	3.58496	11.7793	10.5469	11.4579	7.07682	11.3608	10.96	12.5343	6.97728	7.52356	7.88264	12.0372	7.06609	15.8431	9.56605	12.1147	12.5493	13.0534	13.9833	10.9352
						TCGA-BRCA	TCGA-EW-A423	0	533	white	75	0	1	11.0808	8.73809	9.41996	11.9421	12.183	13.1486	12.3859	10.3718	11.462	8.73471	11.7997	11.9192	12.3753	2	10.255	13.3368	13.0128	8.55842	11.1144	12.6843	13.328	8.70736	7.22882	9.04166	10.7288	7.34873	15.5632	9.77643	12.2402	9.89633	13.4732	12.9582	11.2101
						TCGA-BRCA	TCGA-AC-A3TN	0	456	white	75	0	1	11.2161	8.63662	9.20212	12.3611	10.9894	12.6136	12.9163	9.72792	11.7777	10.1357	11.5023	11.2497	11.5396	2.32193	9.19967	12.6339	11.7715	8.82018	10.1059	11.7202	12.5447	8.65821	7.41785	7.74147	9.52748	6.02237	16.0632	8.82018	11.9683	9.54882	13.3883	13.8851	11.4429
						TCGA-BRCA	TCGA-D8-A27G	0	409	white	75	0	1	12.5682	9.29921	10.8757	10.5699	10.875	11.9359	13.0019	11.2234	10.9076	10.268	12.6909	12.6108	14.0975	2.80735	11.4793	12.2811	13.2825	8.5157	10.9009	12.0427	13.9365	8.77149	8.68299	11.3542	10.6073	7.90087	16.7271	11.1567	13.0307	12.2351	13.9692	12.3826	11.6307
						TCGA-BRCA	TCGA-AC-A8OR	0	40	white	75	0	1	10.8471	7.06609	10.9851	4.80735	11.4605	12.446	12.2309	9.45327	10.9958	8.29921	11.6147	11.7317	12.2553	6.62936	10.749	12.1053	10.792	7.79442	10.3465	11.0362	12.9855	7.01123	6.24793	7.94251	8.77479	4	16.1819	9.84862	11.5078	9.77643	12.4404	12.1069	10.9665
						TCGA-BRCA	TCGA-E9-A1RE	0	1419	white	74	0	2	11.4833	8.15482	10.9701	10.7185	11.245	12.6257	13.0886	12.416	11.0224	6.98868	12.8731	13.1622	13.4451	2	12.6389	12.3628	12.426	8.64746	11.0553	12.571	15.4199	8.47573	8.98868	14.3562	12.0286	7.2854	15.1471	12.5786	13.3295	11.1267	13.9069	10.207	11.062
						TCGA-BRCA	TCGA-AC-A3YI	0	707	white	74	0	2	10.7004	8.54689	11.1774	11.8956	11.2354	11.4445	11.6234	9.35535	10.4998	9.62753	11.7731	11.4979	11.7511	2	10.4888	11.736	11.1929	8.67596	9.86109	10.6874	12.6296	8.87958	9.32418	9.34873	10.973	8.06609	15.6653	9.9629	11.1886	8.62936	12.6344	12.3348	12.0165
						TCGA-BRCA	TCGA-E2-A14U	0	1318	white	74	0	1	11.9894	7.52356	10.5058	10.5546	11.6782	12.3963	12.6867	10.1948	11.5167	11.0914	12.1244	11.8424	12.2665	3.32193	10.3869	12.4916	11	9.79766	10.1849	11.6466	13.0165	9.58496	6.53916	10.5479	11.0389	6.62936	16.2805	10	11.7074	6.65821	13.2126	11.8615	11.6812
						TCGA-BRCA	TCGA-E9-A22A	0	1189	white	74	0	1	11.2691	9.90989	10.983	8.17991	11.0505	13.346	13.6574	11.341	11.937	10.2527	12.3197	12.9882	12.7891	3.80735	11.5324	12.8886	13.6659	9.37938	12.0691	12.4767	13.4662	9.37069	10.2503	10.4594	12.4969	7.56224	16.5154	10.8925	13.1212	11.8986	14.1845	13.3318	11.6671
						TCGA-BRCA	TCGA-E2-A1IF	0	1138	white	74	0	1	9.92333	9.42417	9.99859	10.1898	11.0908	12.2024	12.2995	9.68825	11.5555	10.5915	11.2234	11.9961	12.2327	2.32193	10.7356	12.1105	11.7095	9.89482	10.4666	11.6416	12.8224	9.00562	8.71425	9.66534	10.8765	7.34873	15.345	9.42626	12.1752	10.3998	13.0429	12.4803	11.4848
						TCGA-BRCA	TCGA-A2-A1FV	0	714	white	74	0	1	13.0056	7.69349	11.0546	12.2324	11.585	10.6457	12.3021	11.2491	11.4393	10.7432	11.7574	12.8192	13.2187	1.58496	11.8857	11.973	11.4909	9.65105	12.2354	12.0745	14.5506	10.0526	9.95274	11.6913	11.0293	8.6865	14.2272	11.9267	13.0437	10.1447	14.6254	9.24317	12.7678
						TCGA-BRCA	TCGA-AC-A5XS	0	588	white	74	0	1	11.3487	9.37938	9.61655	10.0728	11.4788	12.0738	12.3231	10.0112	11.6519	10.0941	11.5656	11.6316	11.7065	3.45943	10.42	12.6553	11.5231	9.83131	10.4717	11.1202	11.6032	8.69697	7.36632	8.47573	10.6083	6.53916	15.2228	8.49586	11.6466	10.8849	13.1521	13.1228	11.0437
						TCGA-BRCA	TCGA-D8-A1XY	0	503	white	74	0	1	11.4046	8.2854	10.6248	6.52356	10.5196	11.6198	13.3305	11.098	10.9352	9.55651	12.2198	13.4394	12.6983	1	11.2107	12.2906	12.1646	8.57365	11.7785	11.9248	14.1367	8.76487	9.62936	10.1085	10.5088	7.87036	15.7317	11.0553	12.791	9.02791	12.8184	12.9596	11.421
						TCGA-BRCA	TCGA-D8-A142	0	425	white	74	0	1	10.8711	9.66178	11.5118	7.41785	11.8094	12.1072	12.8671	11.0168	12.5974	10.941	12.4775	12.9202	12.9285	3.58496	11.041	13.449	12.5852	9.66711	10.4409	13.3756	14.3101	8.78136	9.52943	11.2432	12.9851	7.39232	16.2877	11.4702	12.1696	11.8986	13.9235	12.2709	13.4528
						TCGA-BRCA	TCGA-AN-A03X	0	10	white	74	0	1	10.2444	8.02791	10.0768	7.59246	9.93074	11.4762	12.6421	9.80252	10.2276	7.67948	11.0788	11.7557	12.1206	3.16993	10.6768	10.4564	10.6564	7.65105	9.73809	10.3674	12.5672	8.11374	8.81698	8.29921	9.43671	7.12928	15.3013	10.098	11.5864	9.73978	11.7406	11.4893	10.5897
						TCGA-BRCA	TCGA-LQ-A4E4	0	849	white	73	0	2	11.0908	8.31288	9.80735	11.1567	11.3281	11.098	11.6834	10.2082	10.9578	9.10852	11.8061	12.1095	13.1256	1	9.92184	11.9476	11.3185	9.63844	9.36413	11.0808	13.1338	8.94251	7.45943	9.46964	10.4136	6.37504	15.3251	10.1712	11.2318	11.8819	12.2776	11.3049	11.1453
						TCGA-BRCA	TCGA-A2-A0EM	0	3094	white	73	0	1	11.6366	8.31288	11.3371	10.3465	11.2633	11.3581	12.9616	11.5068	10.8918	8.21432	12.2784	12.3767	12.1755	0.01	10.8933	11.6129	11.1105	8.2854	10.1972	11.6573	13.0573	8.27612	8.9629	9.99859	10.4727	7.33985	16.2569	10.7305	12.8037	10.4336	12.6589	11.8463	12.4065
						TCGA-BRCA	TCGA-AR-A0U0	0	1988	white	73	0	1	11.3376	10.4051	11.6662	4.58496	11.3794	12.6777	13.2647	10.796	11.4014	9.01959	14.0195	12.3726	12.3504	1	10.4939	10.0238	12.1264	7.42626	12.9511	12.7179	13.7021	6.94251	8.47168	8.5812	12.4548	6.93074	16.2581	10.8138	12.3753	13.085	12.8667	14.0808	11.9926
						TCGA-BRCA	TCGA-BH-A0BG	0	1871	white	73	0	1	12.2612	9.22641	12.7164	8.49586	11.5882	13.0495	13.6535	12.0081	11.9159	9.60548	12.399	12.5152	11.6133	3.70044	11.9805	11.5304	11.769	9.33762	11.1163	13.325	14.0765	8.02791	7.64386	10.8788	12.729	7.39232	15.6627	11.5897	12.9163	11.4414	13.0826	14.6929	12.4587
						TCGA-BRCA	TCGA-D8-A1JP	0	639	white	73	0	1	11.5088	7.89482	11.0848	10.3641	10.2958	11.2064	11.6755	12.0035	10.0848	6.42626	11.8478	12.4476	10.4969	3.58496	11.6421	11.9986	11.2204	8.0607	11.4325	11.6622	13.8831	8.11374	8.82972	9.57365	11.9883	6.56986	15.583	11.3674	12.211	10.5507	13.3014	10.93	12.7632
						TCGA-BRCA	TCGA-GM-A3NY	0	1162	white	72	0	1	11.1618	9.00282	8.82655	9.11114	11.6896	12.4341	12.1536	10.0471	12.528	9.99718	11.3253	11.5603	11.8013	2.80735	11.1504	12.6915	12.7879	9.24793	11.6243	12.3608	13.0165	9.13186	8.51964	9.75989	11.1	6.12928	16.0241	9.90238	11	10.5324	14.164	12.2363	11.7164
						TCGA-BRCA	TCGA-A7-A26H	0	724	white	72	0	1	12.1824	8.97154	11.4398	10.8057	11.9363	12.6168	13.8003	11.4147	11.1	10.444	12.9919	13.4875	12.2488	2.32193	10.7591	12.2709	12.9418	8.93369	11.5854	12.0199	14.0878	9.21189	9.2503	10.6221	11.9088	8.15987	16.2188	11.3729	13.418	12.058	13.5179	13.4197	12.1075
						TCGA-BRCA	TCGA-D8-A1JL	0	611	white	72	0	1	13.2518	9.38586	12.6298	7	12.192	12.0831	13.2966	11.7436	11.757	10.0126	13.2706	14.1342	13.0903	4.85798	11.5382	13.0405	12.1561	9.00282	11.9833	13.6216	13.669	9.23362	9.05799	9.66888	13.0131	8.31288	16.3868	11.3886	13.4688	12.2694	13.7168	12.3126	12.2273
						TCGA-BRCA	TCGA-D8-A27H	0	397	white	72	0	1	11.2866	8.70736	12.0735	8.2384	12.2755	12.2405	13.8512	10.5469	11.1046	8.77149	12.2656	12.9337	11.4924	3.45943	11.2521	11.994	11.6965	8.18982	9.72962	10.6564	12.5038	9.02237	8.76155	9.82972	11.4858	7.49185	17.906	9.99859	11.5122	12.0641	11.8242	14.1494	10.8376
						TCGA-BRCA	TCGA-B6-A0RO	0	4929	white	71	0	2	11.7185	7.97154	10.3208	10.8463	11.0974	13.8548	13.1632	11.1215	11.4635	9.68825	12.5167	12.2961	12.451	1	11.8254	12.4868	12.056	7.87652	10.4656	11.8657	13.0305	8.33985	7.17991	9.75656	10.5236	6.67243	16.1411	11.1026	12.4663	10.7557	12.3446	13.1128	11.2521
						TCGA-BRCA	TCGA-A7-A26E	0	954	white	71	0	2	11.8897	7.29002	10.1209	11.1488	10.3225	10.8933	12.7295	11.1824	10.9095	8.27146	12.416	12.5683	12.6735	1	10.043	11.1069	10.6542	7.73471	10.8061	11.1456	12.8999	8.26679	10.2963	11.5805	11.7082	7.88874	15.4346	10.8646	12.213	11.6218	14.1569	10.7215	11.4089
						TCGA-BRCA	TCGA-A2-A1G4	0	595	white	71	0	2	12.4357	7.90087	11.6978	11.5732	11.0947	11.6161	12.9207	11.7194	11.3471	9.57554	12.8498	12.7505	12.3611	0.01	11.9683	12.6309	11.5367	8.93958	11.4666	12.7696	14.1408	8.79116	8.58871	10.1344	10.5718	7.86419	15.9704	11.1447	13.5558	12.749	13.8432	9.83131	11.5925
						TCGA-BRCA	TCGA-BH-A0DS	0	78	white	71	0	2	11.3576	8.43879	10.1447	10.388	10.374	11.4083	13.0362	9.94983	10.7288	9.48583	11.4502	12.0168	11.6421	2.80735	10.7665	12.6117	11.0868	9.46148	10.3902	11.2848	12.2405	8.81378	7.99435	8.91289	11.8238	7.10852	15.2647	9.22159	11.5637	9.98584	12.7358	11.8807	11.5464
						TCGA-BRCA	TCGA-A2-A0CT	0	2289	white	71	0	1	10.988	7.87036	10.2444	11.9241	10.062	11.6742	13.2666	12.2018	10.2228	6.82018	11.8463	12.1624	13.0441	2.32193	10.5632	10.2703	12.2536	7.07682	11.2204	11.2639	13.9539	8.224	8.16491	10.9571	11.1573	7.03342	14.3076	11.5003	13.4498	11.2871	12.7194	10.6935	10.7912
						TCGA-BRCA	TCGA-E2-A1IK	0	1800	white	71	0	1	10.8872	8.20945	10.4828	6.64386	10.4429	12.2644	11.9873	10.5088	10.8611	10.0607	11.3287	11.4351	12.3485	4.64386	10.7347	11.7674	11.0423	8.09803	10.3772	11.1202	12.5687	8.14975	6.83289	8.82972	9.02514	6.37504	16.0886	9.44501	11.821	10.1787	12.6891	12.5524	9.82496
						TCGA-BRCA	TCGA-E9-A22B	0	1167	white	71	0	1	10.5546	9.82018	10.6036	9.17742	11.2143	13.4662	13.4776	11.3032	12.1727	7.01123	12.1759	12.4315	13.996	1	11.776	11.2929	13.4086	9.60177	11.3387	12.5536	14.3118	9.20457	9.98299	11.0196	10.716	7.13955	16.3523	11.2198	12.6165	12.4615	13.7618	11.8811	11.2408
						TCGA-BRCA	TCGA-AO-A0J7	0	618	white	71	0	1	11.5053	8.97728	11.4372	7.04439	10.3772	12.1273	12.9496	10.8416	11.7748	10.4179	11.7436	13.0778	13.7415	0.01	12.0119	12.1586	12.3174	7.25739	10.2866	11.8146	13.5353	7.46761	7.19967	8.55842	10.7039	5.93074	15.4702	10.5651	12.6711	13.1304	13.5828	11.7347	11.4893
						TCGA-BRCA	TCGA-E9-A1NH	0	576	white	71	0	1	10.7065	8.59991	9.68299	9.3443	10.5008	11.1991	12.8527	10.0875	10.8297	9.89785	11.2831	12.2116	11.7863	2.32193	10.3554	11.4078	10.599	8.8392	10.128	11.411	12.2816	8.61102	9.86109	10.0403	10.3061	7.47573	16.1863	9.54689	11.5684	10.4105	12.5744	12.1727	10.2877
						TCGA-BRCA	TCGA-D8-A1Y2	0	433	white	71	0	1	11.2894	9.81698	11.5245	6.16993	11.3393	13.1521	13.2834	10.9293	11.3842	9.19476	12.5145	12.9082	12.061	3.45943	11.4278	12.6145	12.6558	8.56224	10.9144	12.0231	13.7118	8.93958	8.66534	8.97441	11.752	6.40939	16.5355	10.2656	12.8124	11.0954	13.9208	12.7136	11.526
						TCGA-BRCA	TCGA-E9-A295	0	375	white	71	0	1	10.0444	8.69349	10.3309	8.91289	10.1241	11.0987	12.5803	9.94691	10.4625	7.41785	11.2656	11.1731	12.4986	1.58496	10.5831	11.1453	11.9177	9.03617	10.2432	11.056	13.2448	9.50978	8.46352	10.5708	11.2113	6.65821	14.8671	10.0954	11.668	10.1459	12.5127	11.4858	10.7887
						TCGA-BRCA	TCGA-A7-A3IY	0	345	white	71	0	1	11.9099	8.48382	10.0196	6.88264	11.2562	12.6517	12.7	10.858	11.7636	6.65821	12.0711	12.1938	12.2677	8.64746	11.6106	12.1225	11.9443	9.17243	11.1548	12.0206	13.326	8.3837	8.82018	10.0098	10.1228	7.09803	17.5842	10.4252	12.416	11.224	13.4805	12.9694	11.3663
						TCGA-BRCA	TCGA-AN-A0FD	0	196	white	71	0	1	10.7013	8.16491	10.4157	5.88264	10.9121	13.0133	12.4197	11.0701	11.2131	9.18239	11.6479	11.9181	12.4538	0.01	11.0934	11.3707	11.7147	7.37504	10.6636	10.927	12.8986	6.97728	8.30378	11.224	10.783	5.58496	15.3835	10.3848	12.0751	11.3415	13.7489	11.5088	10.0098
						TCGA-BRCA	TCGA-AC-A8OS	0	70	white	71	0	1	11.5425	8.40514	10.8872	9.69349	11.1466	11.056	11.8174	9.70908	10.4481	9.32418	11.4742	11.5817	12.5041	2.80735	9.19722	12.0413	9.45121	10.5147	9.76653	10.9614	12.1357	10.3298	9.28771	10.2656	10.7928	8.40088	15.5219	9.49785	11.4903	10.2854	12.3562	12.263	10.1357
						TCGA-BRCA	TCGA-E9-A1N3	0	1059	white	70	0	2	12.55	7.61471	12.3183	12.116	11.676	12.5718	12.8903	12.2225	11.445	11.1478	13.0441	12.8039	14.2296	1	11.444	11.6239	11.7764	9.22159	11.0674	11.744	14.1731	9.31515	13.8309	9.59619	10.9144	8.90388	15.6077	11.2639	13.1248	11.8849	13.205	12.013	11.8009
						TCGA-BRCA	TCGA-A7-A425	0	447	white	70	0	2	11.1517	8.53528	11.0042	10.1874	11.3778	13.0808	12.3174	9.75989	11.227	9.32643	11.2656	11.42	12.0081	2	10.1935	13.7842	10.8811	11.1674	9.94105	11.4105	11.9293	10.6961	7.48382	9.43254	11.0244	7.69349	15.4084	9.21432	12.2438	10.6184	12.8258	13.2564	11.2076
						TCGA-BRCA	TCGA-E9-A1R3	0	78	white	70	0	2	10.102	9.224	11.1861	8.02237	11.268	12.0835	13.2837	10.4294	11.7091	9.91886	12.5833	12.5309	11.9912	3.45943	11.2009	11.7474	11.6502	8.47168	11.1892	12.0293	12.6904	8.16993	9.27146	10.7855	11.7603	7.39232	16.7679	10.0375	12.6924	4.75489	13.332	12.207	11.3832
						TCGA-BRCA	TCGA-AN-A0AS	0	10	white	70	0	2	11.1978	8.65821	10.444	5.55459	11.0126	12.0957	11.9658	9.91737	10.6926	9.3015	11.6782	12.3095	11.8408	5.83289	10.7194	11.7756	10.4666	8.90388	9.94105	10.9344	12.769	7.62205	8.67948	9.12412	11.716	5.72792	15.8101	10.3004	11.3939	9.2854	12.9246	12.5988	11.5358
						TCGA-BRCA	TCGA-A2-A0EN	0	4088	white	70	0	1	11.0741	10.137	10.9922	11.5358	10.8265	11.941	12.8568	10.6294	11.4009	6.30378	12.2597	12.4838	13.2534	5.24793	11.4919	11.7756	11.4589	10.568	10.6564	11.4964	12.9766	9.75322	10.0014	10.5068	10.9166	8.26209	16.0619	10.2854	12.1354	10.4126	13.1491	13.1569	11.5957
						TCGA-BRCA	TCGA-AR-A1AK	0	3159	white	70	0	1	11.4062	9.18488	11.796	11.5362	11.0035	11.3669	12.5321	10.3837	10.5594	8.01681	11.8811	12.0587	11.1529	3.80735	10.5774	11.8684	11.8427	9.61287	10.9076	12.4803	12.6821	10.3707	8.88264	11.3761	10.9469	8.19967	15.2989	10.0593	12.0868	10.6636	12.3287	13.582	11.1529
						TCGA-BRCA	TCGA-AR-A2LL	0	2012	white	70	0	1	11.6179	9.61839	11.5088	8.85487	11.7048	11.4383	13.2152	11.1306	10.8956	5.97728	12.2682	12.7532	13.7418	1.58496	11.4481	11.6826	12.6847	8.04985	10.4419	12.1463	13.9151	8.08215	7.47573	9.57175	11.5826	6.9542	15.1382	11.3821	12.263	10.5068	12.623	11.8963	12.006
						TCGA-BRCA	TCGA-EW-A1J6	0	875	white	70	0	1	11.0566	8.86419	9.75322	7.41785	11.0286	12.0951	11.8788	11.1712	12.0063	6.32193	11.0307	12.8811	11.6883	3.16993	12.6396	12.5245	13.4251	7.47573	11.8857	12.8971	14.2513	8.3837	7.33092	11.557	11.3026	7.17991	14.3285	11.1306	11.2814	10.3185	13.8545	10.9687	10.6439
						TCGA-BRCA	TCGA-D8-A1JT	0	405	white	70	0	1	11.9166	8.35755	10.5236	6.50779	10.3761	10.5699	13.4114	12.5567	11.672	7.9542	12.2955	13.4441	14.2104	1.58496	12.6837	11.5826	11.93	5.88264	12.3576	12.6713	14.6714	6.65821	7.73471	10.8727	12.0035	7.45121	14.9962	11.9535	12.9485	11.4502	14.4967	10.4645	11.2825
						TCGA-BRCA	TCGA-A1-A0SB	0	259	white	70	0	1	11.2825	5.80735	10.6555	9.07146	10.8711	12.1209	12.3576	10.1724	10.764	8.93074	11.9465	12.3718	11.7703	1.58496	10.2586	10.3945	10.7262	7.40939	9.93369	10.8887	12.6733	7.76155	8.77149	12.4871	11.4517	7.01123	14.5887	10.4686	11.8226	9.67243	12.2886	8.20945	11.7632
						TCGA-BRCA	TCGA-LL-A9Q3	0	532	white	69	0	2	9.26679	9.23122	9.13186	10.0782	10.4378	13.3991	12.1602	8.93074	11.3907	10.1874	10.927	10.9241	12.8134	2	9.94105	12.7056	11.4231	7.53916	10.6421	11.346	12.4463	7.88874	6.2854	7.85798	10.1935	7.16993	15.5338	8.7039	11.2958	9.55842	13.3821	14.8473	10.6511
						TCGA-BRCA	TCGA-AN-A0XP	0	9	white	69	0	2	11.4215	8.90087	10.4242	9.45943	10.5028	11.3815	12.7924	10.633	10.9469	9.98442	12.1418	12.5098	12.84	0.01	10.6348	11.937	11.2021	8.37938	12.0324	11.3191	12.8357	7.81378	9.42206	10.2082	10.2384	7.48382	16.5858	9.87036	12.6968	11.014	13.275	13.5304	10.9986
						TCGA-BRCA	TCGA-AR-A2LE	0	5062	white	69	0	1	12.5929	7.85175	10.3174	7.85175	10.2082	11.2644	12.1092	11.0808	10.4888	8.43463	11.9407	11.9012	14.4001	2.32193	10.5068	12.0413	10.2668	8.86728	11.9215	10.8796	13.2108	8.47168	8.47168	9.20212	10.5915	7.12928	15.2366	10.6546	11.7912	10.4788	12.6968	12.3595	11.363
						TCGA-BRCA	TCGA-BH-A0H9	0	1247	white	69	0	1	11.2644	8.41785	10.3004	11.8281	10.3421	13.0998	12.762	11.117	11.0307	8.88264	12.1935	12.4176	12.9578	2.80735	10.8017	12.6861	11.4898	8.83605	10.5575	11.3859	13.2424	7.47573	7.66534	9.01123	10.7013	7.50779	16.1622	11.2556	12.5904	10.9061	13.5791	12.3117	11.1923
						TCGA-BRCA	TCGA-E9-A24A	0	747	white	69	0	1	12.0331	8.16491	10.8796	6.08746	10.8226	10.9151	13.0649	11.7292	11.151	9.30834	12.4949	12.7832	12.8952	1.58496	11.0112	11.23	10.8494	9.11374	11.6096	12.0957	13.3655	8.34873	9.82655	10.5498	10.6511	6.96578	15.885	10.5821	12.8128	11.6425	12.9629	11.4645	11.9012
						TCGA-BRCA	TCGA-BH-A0EB	0	745	white	69	0	1	11.4491	8.65464	10.3298	8.29921	11.1643	11.7151	12.543	10.8626	11.3348	9.62022	12.2258	12.3584	12.7746	0.01	10.7936	11.4236	11.7009	8.82655	10.988	11.5488	12.8844	8.50383	9.33762	9.94105	10.5157	7.16993	16.4507	10.0755	12.602	10.4294	12.9556	11.4289	10.7723
						TCGA-BRCA	TCGA-D8-A1XQ	0	499	white	69	0	1	10.9622	9.84078	10.4502	5.52356	11.3815	12.7669	12.6909	11.5377	11.7305	8.49985	13.0654	13.8456	14.4015	3	11.6179	12.0165	11.4142	7.53916	10.3004	12.0631	14.3069	7.91886	7.88264	10.4929	13.2811	6.10852	16.3533	11.3095	12.5078	12.3219	12.705	13.6541	12.3926
						TCGA-BRCA	TCGA-BH-A0H0	0	461	white	69	0	1	12.8681	6.91886	10.2336	12.5565	11.5836	11.8646	13.445	12.0399	10.8154	11.0175	12.9108	13.2719	14.7322	2	11.6161	13.5448	12.3177	9.54882	11.8517	12.1124	14.0014	9.74315	7.94837	11.1787	11.9748	7.40088	14.9083	11.1351	13.7577	11.762	14.1742	12.8895	13.5506
						TCGA-BRCA	TCGA-AO-A1KS	0	350	white	69	0	1	11.8273	8.17991	9.91289	9.91439	9.89785	10.5167	12.9409	11.8719	10.7632	9.85487	12.7545	13.2421	12.2164	2.32193	11.5216	11.2854	11.568	7.22882	11.6362	12.2369	14.2627	7.76818	8.72792	11.1163	12.8564	7.76155	15.0031	11.978	12.9502	12.2868	13.0039	8.52748	11.0647
						TCGA-BRCA	TCGA-BH-A0E6	0	293	white	69	0	1	10.5459	8.83605	10.4147	10.1812	11.6032	13.3903	12.7202	9.15482	12.1759	10.6101	12.0705	13.3082	12.1341	2.32193	12.9766	13.5754	13.319	9.67066	9.82177	13.645	13.1853	8.87344	7.87036	8.44294	10.9513	7	15.5037	9.29692	12.0587	11.4351	14.1577	11.5013	12.8525
						TCGA-BRCA	TCGA-AR-A1AV	0	1864	white	68	1	1	12.3318	8.95128	11.0901	6.45943	11.3117	12.5182	12.7785	11.2015	10.6795	9.36851	12.753	12.6214	12.8811	2.58496	11.5474	12.8463	11.6604	8.52748	10.6707	12.1189	13.4892	8.58871	9.31061	10.0914	10.8595	7.26679	16.8637	10.5632	13.1232	10.7177	12.7474	11.4078	10.7846
						TCGA-BRCA	TCGA-EW-A1P1	0	1210	white	68	0	2	10.875	9.58496	11.196	9.84549	10.4798	11.3718	11.8094	10.0914	10.5196	8.90087	11.8872	11.8891	11.236	3.90689	10.5137	11.3767	10.567	11.2627	10.0403	11.058	12.5715	10.769	9.93074	10.9972	11.0735	8.81378	15.3937	9.7364	10.9418	10.196	12.6282	11.8541	11.0627
						TCGA-BRCA	TCGA-AR-A5QN	0	1013	white	68	0	2	11.4184	9.60363	12.0698	9.93221	10.6147	11.8529	12.5882	10.7125	11.3961	10.1267	12.3509	12.0721	13.1451	4	10.9908	13.0944	11.6452	10.821	11.9989	11.6926	12.2058	10.567	9.43045	12.0468	10.9226	7.76818	14.9471	9.86573	12.5285	11.6869	13.6864	13.9435	11.7566
						TCGA-BRCA	TCGA-E9-A1RF	0	200	white	68	0	2	11.3756	9.70908	10.1085	10.3531	10.9447	12.9148	12.7711	10.8811	11.8673	9.48382	12.0468	12.0251	12.6607	2.58496	11.2732	12.318	13.9453	8.70736	10.2143	11.8082	13.5157	8.36632	8.66534	9.68475	11.5755	6.39232	15.9849	10.4315	11.8078	12.2524	13.8781	12.5579	11.1824
						TCGA-BRCA	TCGA-AN-A0XN	0	10	white	68	0	2	10.9908	8.53916	10.4919	6.04439	10.9787	10.7013	12.9365	10.4757	10.3912	7.55459	11.3399	11.9672	12.7385	1.58496	11.0077	11.2568	10.6618	9.25503	10.2842	11.0084	13.0668	8.11894	9.30606	9.56224	11.1331	5.67243	15.6232	10.733	11.3537	10.0307	12.8545	11.3437	11.5023
						TCGA-BRCA	TCGA-B6-A1KF	0	3088	white	68	0	1	10.668	9.16491	9.47978	4.90689	10.7271	12.3753	11.9586	11.0189	11.5575	10.268	12.6926	12.72	10.9233	4	11.242	11.8788	11.115	8.33092	10.5708	12.4871	13.601	7.18982	8.69697	9.21675	12.7838	6.35755	15.0412	10.5459	12.5155	11.4625	13.848	8.12928	13.481
						TCGA-BRCA	TCGA-AO-A0JF	0	1980	white	68	0	1	12.0851	8.8857	10.9542	10.2384	10.4778	11.3443	12.2049	11.1991	10.4919	8.49985	11.9337	12.1331	12.3985	3.16993	10.4696	11.5661	10.7177	10.4635	10.374	10.9658	12.2085	10.3869	10.5953	11.2509	10.224	9.25739	16.0905	9.80413	12.5765	10.9549	12.4998	12.4625	10.4073
						TCGA-BRCA	TCGA-BH-A0EE	0	943	white	68	0	1	13.5281	7.45943	9.56415	5.67243	10.7237	12.7417	12.7326	11.218	11.9443	10.4409	12.3691	13.1502	13.8727	3.45943	12.4286	11.8796	14.0301	6.97728	12.2073	12.8851	14.0749	6.10852	6.59991	10.0701	10.5324	5.78136	16.7601	10.5831	12.9873	12.4307	14.2071	12.5765	11.6711
						TCGA-BRCA	TCGA-D8-A4Z1	0	659	white	68	0	1	11.5618	7.67948	10.9658	10.021	10.8665	11.2662	11.703	9.9542	10.3641	9.56224	11.3592	11.3729	10.6865	1.58496	9.36632	11.6298	9.76984	9.59432	9.71768	10.6321	12.0403	10.2715	8.76155	11.0286	10.6528	7.06609	14.968	9.42417	11.2744	8.66534	11.8777	11.3106	10.7245
						TCGA-BRCA	TCGA-E2-A154	0	591	white	68	0	1	10.8564	8.25267	10.8533	6.06609	10.2644	11.1376	12.3791	10.4221	10.7211	8.33985	12.3264	12.5577	11.7288	3.45943	11.1668	11.5999	11.1299	7.53138	10.5236	11.3756	13.1989	6.91886	8.53138	8.41785	10.5718	5.64386	15.6524	10.5925	12.4305	10.9766	12.2021	11.1737	11.4848
						TCGA-BRCA	TCGA-XX-A89A	0	488	white	68	0	1	11.2837	9.29692	10.749	9.87652	11.1039	11.5971	11.7056	10.3641	10.4747	6.08746	11.3421	11.421	12.3658	5.08746	10.058	12.5238	10.0782	10.643	10.0168	11.1497	12.1049	10.2033	8.25739	9.89482	10.6511	7.85175	15.1543	9.67596	11.5962	9.5216	12.2161	12.9933	10.6475
						TCGA-BRCA	TCGA-AN-A046	0	10	white	68	0	1	10.8619	8.77808	10.6636	7.66534	10.3061	12.1075	12.3343	9.85487	11.446	9.31061	12.1196	12.4218	12.8194	2.32193	10.5411	10.9009	11.7944	8.32643	11.5231	11.744	13.7039	8.23362	8.67243	8.85487	11.1812	7.47573	16.2159	10.4929	12.776	11.368	13.2938	13.0026	11.2198
						TCGA-BRCA	TCGA-GM-A4E0	0	2191	white	67	0	2	10.3837	8.93664	10.1997	9.25267	9.80896	11.0279	10.3576	9.65464	10.5108	6.33985	10.1215	10.5068	11.3912	3	9.64746	11.4615	10.2216	11.842	9.83763	10.4242	11.3487	11.7364	8.8857	9.82337	10.0526	7.53138	13.9922	8.3966	10.1923	7.62205	11.5187	11.7453	9.73132
						TCGA-BRCA	TCGA-AN-A0XV	0	162	white	67	0	2	12.2473	8.58871	11.1383	7.52356	10.8673	12.5063	12.8965	12.1665	11.0327	9.2384	12.1421	12.6481	12.4846	1.58496	11.5236	11.7347	11.0077	10.0084	11.7249	11.9304	13.6879	10.2009	9.33985	10.5594	10.1202	8.7211	15.4212	10.7707	12.6636	10.8017	13.3257	11.7065	10.8154
						TCGA-BRCA	TCGA-AN-A0FW	0	11	white	67	0	2	10.9016	9.09276	10.6312	8.68299	10.9751	12.6255	12.5708	11.4666	11.1383	9.74819	12.2691	12.7372	12.0815	2.32193	11.4263	12.0331	13.9399	10.4062	11.1911	11.5043	12.9947	9.3443	8.12412	13.0851	10.9993	7.96578	16.761	10.9751	13.0112	12.1108	13.7369	12.4535	12.8855
						TCGA-BRCA	TCGA-A2-A0CW	0	3283	white	67	0	1	11.1573	9.87498	10.2252	12.5063	11.0593	13.6366	13.1966	10.9009	11.7232	10.7632	12.6793	13.5182	12.2101	1	10.1472	14.3836	12.2969	7.7879	12.6826	11.69	13.8	7.71425	7.15987	9.73132	11.7981	5.97728	16.7707	11.2586	13.3555	13.1049	14.7959	12.5519	11.1228
						TCGA-BRCA	TCGA-E2-A10B	0	1141	white	67	0	1	12.0495	9.53916	11.3123	10.6935	11.2761	12.4354	13.0314	11.0147	10.8082	10.3332	13.0327	12.5348	13.9767	3.90689	11.5911	12.8267	11.381	8.72792	10.9979	11.7895	12.9719	8.57743	8.9629	11.4656	10.952	7.01123	15.8513	10.7624	12.8043	11.5416	13.0756	12.5861	11.6371
						TCGA-BRCA	TCGA-A2-A0YM	0	965	white	67	0	1	12.9381	9.37938	12.1033	6.2854	11.3146	11.7756	13.174	11.783	11.0519	10.4717	14.3204	13.8198	13.1877	4	11.6475	15.0283	11.9278	8.96578	10.7313	12.6978	14.3507	7.40088	7.70044	9.24555	13.0074	5.12928	16.1195	11.8498	13.2845	13.0485	13.6466	12.9996	13.8028
						TCGA-BRCA	TCGA-BH-A0GY	0	923	white	67	0	1	11.8254	8.26209	9.82177	10.043	9.89633	11.4522	12.7222	10.3902	10.7056	9.94691	12.0878	12.4592	12.1507	3.16993	11.1176	12.0738	11.4067	7.65821	10.8384	12.3485	13.2293	7.43463	8.16993	8.53138	11.1026	6.88264	16.1077	10.927	12.4656	11.3404	12.4878	11.7013	10.6284
						TCGA-BRCA	TCGA-A1-A0SO	0	852	white	67	0	1	12.2174	9.96723	11.5915	5.20945	11.7469	11.7956	13.9974	12.2137	12.7341	10.2633	13.4935	14.8074	13.0681	2	11.9121	11.6751	13.1824	7.91886	11.5618	13.0583	14.8658	7.35755	6.89482	9.60363	12.8359	5.9542	16.9793	11.983	13.9775	14.6703	13.2213	9.72281	12.5791
						TCGA-BRCA	TCGA-AO-A0J3	0	651	white	67	0	1	11.4686	9.50184	11.5387	7.2854	12.4919	13.3554	13.9888	12.5527	12.4561	9.05799	12.3974	13.1726	15.3997	1.58496	12.8512	12.27	13.9025	8.90689	11.6366	11.6384	14.6305	8.79116	6.76818	10.7125	11.6786	8.13443	15.8839	11.7793	13.403	12.4273	13.8503	11.0196	12.1586
						TCGA-BRCA	TCGA-BH-A0HN	0	516	white	67	0	1	9.99859	6.93074	9.76818	11.1586	11.1111	12.4157	12.1984	9.65642	11.4142	10.2515	10.988	11.7768	11.7903	1	11.4073	11.7065	11.3537	6.20945	10.1762	10.5137	12.7942	7.19967	5.80735	6.83289	10.7151	6.40939	14.6698	8.77479	11.7339	9.70736	13.2684	11.8525	11.1085
						TCGA-BRCA	TCGA-E9-A1RD	0	34	white	67	0	1	12.5122	8.79442	10.9651	10.2396	11.1092	11.388	13.354	10.9744	11.5416	9.43671	13.1646	13.0858	12.7349	0.01	11.3848	11.5892	11.6362	8.61471	11.1923	12.1277	13.8811	8.8857	9.45327	10.3298	11.3393	8.07682	16.1647	10.7607	13.3697	12.2814	13.4431	11.9106	11.5425
						TCGA-BRCA	TCGA-B6-A0IO	0	5042	white	66	0	1	11.4732	8.3966	9.44915	9.81538	10.9454	13.2199	12.4696	11.3247	11.6124	9.10066	12.6575	12.416	13.3226	2.58496	11.7104	11.4226	13.0025	6.97728	10.8948	12.2983	13.5739	7.42626	6.98868	9.25974	11.4691	5.83289	17.0732	10.6083	12.3864	11.4898	13.5406	11.9701	11.2715
						TCGA-BRCA	TCGA-A2-A04N	0	4354	white	66	0	1	11.7398	8.44294	9.83447	9.20457	10.6064	11.9252	13.0853	10.4909	11.1421	9.9542	11.6987	12.2961	12.0967	1	10.8408	12.0372	11.3476	7.97154	10.5137	11.7419	13.413	8.12928	8.73132	11.911	11.7453	7.01123	15.6944	10.1787	12.1724	9.33985	13.1472	11.4078	10.8619
						TCGA-BRCA	TCGA-A2-A0SU	0	1662	white	66	0	1	11.3756	7.87652	10.4533	8.32643	10.1548	11.7207	12.571	10.5708	10.9586	8.68299	11.1421	12.5793	12.4442	2.58496	10.8773	11.6926	11.3504	8.91588	10.7773	11.1668	13.2163	9.23362	8.87344	10.1649	10.9248	8.33092	15.6123	10.5127	12.6602	10.5108	12.8204	11.0505	10.9432
						TCGA-BRCA	TCGA-A7-A0CD	0	1165	white	66	0	1	11.6742	7.39232	11.8595	7.61471	11.0828	11.849	13.6559	11.5948	10.8416	7.69349	12.1668	13.333	12.5663	0.01	11.8086	12.1299	12.5732	9.02514	11.7125	11.4014	13.7309	9.11114	8.86728	9.96723	9.98726	7.25739	15.6249	10.9498	13.6573	11.258	13.4105	12.0684	11.7582
						TCGA-BRCA	TCGA-BH-A0B1	0	1148	white	66	0	1	12.2761	8.42206	11.0828	7.60733	10.8146	11.5599	12.4696	11.3471	10.7271	6.94251	12.5018	13.0058	10.8408	2.32193	11.6142	12.318	11.7503	8.57365	11.1478	11.9005	13.7545	9.41151	9.61471	10.584	12.4375	8.224	15.0857	11.4681	12.6965	11.5708	12.4014	11.764	11.0908
						TCGA-BRCA	TCGA-A2-A4S1	0	820	white	66	0	1	9.74147	8.98868	8.63662	5.16993	11.8978	11.7549	11.4078	9.05257	10.4747	4.52356	10.2969	10.6662	8.39232	5.42626	9.66534	12.1215	10.2586	7.74819	8.51175	10.3253	10.9593	8.13955	8.40088	9.38802	8.32193	10.4179	15.5492	8.53528	10.2348	9.61655	11.948	12.8388	9.12412
						TCGA-BRCA	TCGA-AC-A3YJ	0	754	white	66	0	1	10.9366	8.10852	10.2444	5.45943	11.7372	13.1677	12.5627	9.55651	11.4231	5.24793	11.5118	11.3287	12.2411	2.32193	11.3432	11.9381	11.6407	8.07146	9.83605	11.2639	12.5824	8.2384	6.47573	7.76155	9.59805	6.80735	15.9111	9.31288	11.3465	9.57743	13.0746	11.8918	11.3498
						TCGA-BRCA	TCGA-D8-A1X9	0	727	white	66	0	1	11.9333	8.82655	10.9001	8.33539	10.9979	11.6339	13.5741	11.5999	11.5751	8.21432	12.9298	12.9912	12.4959	2.58496	12.3518	11.4383	12.1286	8.76818	11.762	12.8802	13.8139	8.56986	9.00282	11.5845	11.1046	6.70044	16.6865	11.188	13.3308	12.0708	13.2932	11.9643	10.9851
						TCGA-BRCA	TCGA-D8-A27E	0	530	white	66	0	1	12.7588	7.85175	11.8222	10.0526	11.5241	12.5491	12.895	10.6917	11.3966	9.89482	12.6631	12.9322	13.582	3.70044	11.1818	11.8388	11.5028	7.33985	11.388	11.7389	14.089	8.47978	8.37069	9.63118	10.332	8.87036	16.2745	11.1131	12.816	9.16742	13.2229	12.5828	11.8301
						TCGA-BRCA	TCGA-AC-A3W7	0	471	white	66	0	1	11.825	8.66534	10.8463	11.4888	11.7181	12.0196	12.4755	10.3399	11.3832	10.3174	12.0855	11.9185	13.2081	2.58496	9.85331	13.2787	10.0835	9.64024	10.2633	11.7241	12.7828	9.61839	8.66178	10.0901	11.3614	7.67243	16.8434	10.1059	12.2527	10.9571	12.8925	12.8128	11.6821
						TCGA-BRCA	TCGA-W8-A86G	0	347	white	66	0	1	11.1941	7.91886	9.91439	11.8158	10.8265	11.6878	11.9121	9.50581	10.7381	11.2252	11.2842	11.0634	11.7427	1	10.032	12.0406	10.8082	8.56224	10.0661	11.0126	12.3802	8.3966	7.47573	9.86882	10.6909	6.97728	15.1064	9.29462	10.9454	7.9542	12.729	11.4046	11.528
						TCGA-BRCA	TCGA-A2-A25F	0	322	white	66	0	1	12.3877	10.5498	12.3982	9.42417	11.8194	12.2237	12.7279	12.4515	11.5211	7.02237	13.3899	13.4482	12.6762	5.42626	11.8796	12.9471	11.8194	11.056	11.4455	12.1981	13.4149	10.4051	10.1573	11.2837	12.6578	8.66178	16.3655	11.2378	12.981	13.526	14.1547	13.6806	11.7719
						TCGA-BRCA	TCGA-E9-A1R4	0	186	white	66	0	1	10.8788	8.54689	10.8665	10.8289	10.9204	11.7091	13.503	10.3399	11.4014	9.81378	11.6488	12.0502	12.9033	1	10.5527	11.9567	11.1059	8.25267	11.6636	11.3977	13.0875	7.7211	8.86419	9.9542	11.0091	6.76818	15.4433	10.4757	12.88	11.3663	12.7427	12.842	11.4429
						TCGA-BRCA	TCGA-AN-A03Y	0	10	white	66	0	1	11.2889	7.76155	9.94398	11.4157	11.0614	12.2378	12.6027	10.4574	10.9866	5.85798	12.7661	13.2555	10.783	2.80735	11.7138	11.2485	12.2444	7.30378	10.4231	12.1154	13.8599	8.6865	7.74819	8.46761	11.268	6.6865	15.6074	10.7838	12.6071	9.90388	13.3322	10.9651	13.0899
						TCGA-BRCA	TCGA-BH-A0B4	0	1191	white	65	1	2	10.1749	8.14466	10.5187	8.57743	10.3231	11.526	13.138	9.5812	10.7364	8.21432	10.9665	12.0399	11.776	1	10.1849	12.0835	12.3443	9.19967	10.2538	10.792	12.9331	8.87652	8.38802	11.9936	10.5314	6.65821	14.8936	9.73132	11.1007	11.1137	13.3178	11.1624	10.1046
						TCGA-BRCA	TCGA-BH-A0H7	0	702	white	65	0	2	11.6804	8.89178	10.6644	9.66	10.599	13.3859	14.3619	10.9233	10.7194	9.69697	12.2668	12.8311	12.366	1.58496	11.0954	12.1095	11.9388	8.46352	10.676	12.1183	12.9553	8.43879	9.52356	9.83763	11.988	7.44294	16.1895	10.5774	12.3644	11.007	13.688	12.1911	11.4727
						TCGA-BRCA	TCGA-D8-A1Y0	0	472	white	65	0	2	12.1111	9.67419	12.3309	13.1788	11.3112	11.7232	13.1941	12.0748	11.1849	9.80252	12.5906	13.5475	12.2052	3	11.69	12.3699	11.9944	9.77972	11.3399	12.4051	14.0689	10.0821	10.2958	11.5641	12.4704	8.43879	15.4116	11.2842	13.2795	12.6142	13.4868	12.6266	12.6154
						TCGA-BRCA	TCGA-BH-A0HP	0	414	white	65	0	2	12.3309	8.57743	10.8114	12.4054	11.1997	11.7891	13.0476	10.6618	11.0593	10.5736	12.1652	12.5428	11.8568	2.58496	10.2691	11.6375	10.6165	9.63844	11.3674	11.7415	13.3554	9.34651	9.62205	10.8978	11.2155	9.46352	15.4759	10.3049	13.0377	10.9651	13.5664	12.3157	10.8098
						TCGA-BRCA	TCGA-C8-A133	0	0.5	white	65	0	2	12.211	7.29462	11.1818	3	10.9837	13.4085	12.4014	10.2715	10.8273	8.46352	11.8727	12.1092	11.6667	2	10.9535	12.1802	11.8521	7.56986	10.3354	11.1376	13.5198	7.82018	5.24793	6.18982	9.52552	7.31288	15.1713	10.0755	12.0838	9.48784	13.3637	12.7584	11.056
						TCGA-BRCA	TCGA-AR-A24H	0	4894	white	65	0	1	13.3366	9.36632	11.2088	9.11374	11.7855	12.187	13.464	12.2402	11.9629	10.2204	13.7569	13.3838	14.4907	3.32193	11.2767	11.9758	13.2463	8.65105	11.8887	13.5958	14.9663	8.32643	8.09276	10.2842	12.247	6.87036	15.7099	12.4273	13.5022	13.7341	14.0682	12.7317	13.0906
						TCGA-BRCA	TCGA-AR-A1AW	0	2632	white	65	0	1	11.6935	10.1997	10.7715	11.2574	10.8463	11.3298	12.263	11.6115	10.697	7.10852	12.4163	12.0928	11.7211	4.08746	10.6202	11.7423	11.4625	8.44294	11.3767	11.8388	13.1424	7.74819	7.16993	9.68124	12.2432	7.82018	15.3534	10.8202	11.9683	11.9894	12.581	13.3655	11.8603
						TCGA-BRCA	TCGA-AC-A2FO	0	2255	white	65	0	1	11.9498	8.73809	11.0265	12.4221	10.8765	11.4878	12.817	10.9993	11.0715	8.40514	11.9454	11.8781	13.424	4.52356	10.4949	12.332	10.7056	10.5177	10.5962	11.8102	12.7283	10.5008	9.60918	11.4737	11.0795	8.29921	15.2339	10.224	12.3035	9.95274	12.8781	12.7956	11.2204
						TCGA-BRCA	TCGA-E2-A15T	0	1563	white	65	0	1	11.8451	7.2854	11.6303	9.74315	10.9159	11.2609	13.1413	11.4984	11.014	10.2958	12.5379	12.8613	14.635	2.32193	11.0954	12.272	12.0536	8.84235	10.6147	11.8634	13.934	8.18488	8.92184	12.5758	11.0286	6.90689	16.0271	11.3129	13.4892	12.7271	13.112	10.7879	11.5788
						TCGA-BRCA	TCGA-AC-A2FB	0	1234	white	65	0	1	12.0788	9.29692	11.4398	13.235	11.0382	11.6613	12.6115	11.3587	11.0694	9.73471	12.3149	12.477	12.9261	4.39232	11.3208	11.3891	10.4727	9.73809	11.7288	11.8021	13.1762	10.3772	9.0634	12.3177	11.3842	9.03892	16.1758	10.6147	12.6184	10.9432	13.3159	13.2052	12.3663
						TCGA-BRCA	TCGA-AR-A2LN	0	1161	white	65	0	1	11.5152	8.11894	10.9256	11.1202	10.6027	10.5746	11.1818	9.70563	9.95128	7.46761	11.3641	11.1812	11.2644	3.16993	8.93664	11.2877	8.90689	10.4221	9.73471	10.8471	11.6817	10.5565	9.42417	10.4294	10.3815	7.83289	14.9436	9.11374	11.1293	6.70044	11.5541	11.8846	10.8471
						TCGA-BRCA	TCGA-AR-A1AY	0	1026	white	65	0	1	11.683	9.16993	10.1241	6.6865	11.0587	11.6724	11.3663	10.4798	11.0715	10.6129	13.4401	13.6551	13.577	3.58496	11.6653	13.0931	11.1941	7.87036	11.2456	13.4903	13.5115	6.9542	8.2854	9.31288	13.3911	6.22882	16.205	10.4737	13.6691	11.6569	12.5031	12.7457	13.3451
						TCGA-BRCA	TCGA-GM-A5PX	0	551	white	65	0	1	11.4635	9.35975	9.9901	10.1799	10.9513	11.7339	12.4674	10.4574	11.5231	8.87344	11.3021	11.5976	12.0244	1	10.3912	11.8576	11.544	9.94983	10.8811	11.1978	12.5634	10.3487	9.50779	10.1472	10.2784	7.97728	15.358	9.2854	12.1367	7.55459	13.0161	12.8572	11.0154
						TCGA-BRCA	TCGA-E9-A5FL	0	24	white	65	0	1	9.71768	10.1357	9.66	8.29002	10.3987	13.7469	11.6434	7.84549	12.0244	8.47168	10.6537	11.9784	11.4625	7.74819	10.9054	12.9174	13.4322	8.90989	9.76653	12.2252	12.4263	8.29921	7.6865	8.31741	11.6935	7.19967	15.6491	8.30834	10.9715	11.4666	15.5404	12.768	11.1312
						TCGA-BRCA	TCGA-E2-A108	0	837	white	64	0	2	10.8265	9.75322	11.5068	11.6839	10.7082	11.7078	12.3357	10.6742	10.7993	10.2467	11.87	12.169	11.8178	3.32193	10.4041	12.0751	10.7632	11.2935	10.0458	11.8906	12.481	9.99152	9.56605	10.3685	11.825	8.38802	15.4681	9.7879	11.5651	10.9506	12.7638	13.0984	10.796
						TCGA-BRCA	TCGA-AR-A1AX	0	2629	white	64	0	1	11.5798	8.98299	11.6348	12.444	11.0546	11.8021	12.4411	10.9972	10.5765	9.56415	13.061	12.7642	11.3253	4.80735	10.6303	12.4112	11.9133	8.69349	10.8963	11.944	13.2909	9.58496	9.25739	10.2216	11.9256	8.52356	16.0625	10.6987	12.446	10.9694	12.7249	12.8927	12.0475
						TCGA-BRCA	TCGA-BH-A0DL	0	2381	white	64	0	1	12.4404	9.84706	11.5541	5.52356	11.6497	12.8796	12.7838	10.7591	11.5343	8.82337	12.7954	12.95	14.3183	0.01	12.0858	11.1978	11.6008	7.88264	11.4168	11.9148	12.3622	7.44294	6.91886	8.633	13.1293	6.59991	16.9483	9.84235	12.8825	13.9654	14.0291	14.201	12.4901
						TCGA-BRCA	TCGA-E2-A15R	0	1732	white	64	0	1	12.9438	8.58871	12.7112	9.59059	12.6011	11.9274	14.0694	11.7104	11.5008	11.6564	12.9828	13.6812	15.0299	3.16993	12.1331	13.5134	11.8269	7.96578	11.5665	10.6662	14.5093	8.77479	8.90989	11.5187	12.0206	8.07682	15.3413	11.8982	14.5884	11.9816	12.463	11.1228	12.9135
						TCGA-BRCA	TCGA-BH-A0B8	0	1569	white	64	0	1	10.7591	8.60363	11.6804	7.45121	10.2372	11.6782	13.0993	10.2609	10.4858	8.07146	12.1867	12.6165	14.1336	1	11.6631	12.0147	11.6303	8.22882	9.71425	11.0721	12.7709	9.32418	8.51964	10.865	10.2082	7.04439	14.7445	10.0471	12.0049	11.0133	12.1013	12.021	11.5925
						TCGA-BRCA	TCGA-AO-A0JC	0	1547	white	64	0	1	11.2186	10.543	10.6008	10.6055	10.9069	12.0868	12.192	12.3501	11.4142	5.35755	11.5713	11.9538	10.8001	6.75489	10.8313	11.7727	10.7985	9.83131	11.4533	11.7095	12.3899	9.59246	7.9542	10.341	12.9524	8.93369	15.0399	9.62936	11.5358	11.2556	12.6946	12.5999	9.9263
						TCGA-BRCA	TCGA-E9-A1R7	0	1467	white	64	0	1	10.9374	6.55459	10.3038	12.5748	9.66178	10.9204	13.1372	11.4236	10.7056	8.69349	12.623	12.9392	14.0139	0.01	11.2808	11.6729	11.8146	8.34873	11.3393	12.3038	12.7	8.74147	8.12412	10.1636	12.1966	7.45943	15.3859	10.4878	13.0196	12.056	12.7655	11.2378	11.5613
						TCGA-BRCA	TCGA-E2-A109	0	1417	white	64	0	1	11.4094	8.55842	10.9866	9.66178	10.8986	13.3916	12.9908	11.6262	11.2662	9.85487	12.5772	12.9894	14.4984	3.32193	11.8281	11.5943	14.5335	8.85487	11.2568	11.8158	14.1825	9.16491	8.51175	11.1241	11.5779	7.10852	15.8019	11.3292	12.9823	12.1383	13.7071	12.9022	11.461
						TCGA-BRCA	TCGA-E2-A10E	0	865	white	64	0	1	11.1712	8.80735	10.7347	12.703	10.7339	11.4152	13.5193	11.1812	11.2088	8.96	12.7586	12.9792	12.8539	3	11.3907	12.2198	11.8289	8.91886	11.0293	12.0067	13.7286	8.15482	8.32193	9.92184	10.6202	7.64386	15.8573	10.8057	13.2149	11.8895	13.3208	13.1074	11.8114
						TCGA-BRCA	TCGA-BH-A201	0	856	white	64	0	1	12.0947	8.5157	11.3253	10.2408	11.5142	12.0213	13.2249	10.4949	10.7805	9.83763	12.8096	13.2148	12.536	1.58496	11.463	11.8222	11.5177	9.25267	10.851	11.9263	13.7317	9.10852	10.3848	11.9805	11.1053	8.7211	16.0297	10.9687	13.0319	10.796	13.3961	12.0437	12.1338
						TCGA-BRCA	TCGA-D8-A1XA	0	839	white	64	0	1	12.0885	8.2854	10.6609	6.80735	10.8114	12.7013	12.0498	11.4512	10.0279	9.83131	11.7536	12.6207	10.2538	2.32193	10.2796	12.4265	11.1466	6.78136	10.1163	12.5976	13.7454	6.75489	7.45121	9.01959	10.5177	6.67243	15.6254	11.1066	12.683	10.3365	11.528	13.6866	10.6917
						TCGA-BRCA	TCGA-E2-A15F	0	658	white	64	0	1	11.5962	8.51964	11.9061	10.5372	10.7211	11.1235	12.5515	11.0161	10.9513	9.50184	12.2464	12.4813	12.3504	2.32193	11.557	11.9614	10.5699	8.00562	10.6528	12.0835	13.4679	8	8.37504	14.6392	11.3112	7.48382	15.0799	10.8439	12.5483	10.9851	11.8975	10.6119	11.0458
						TCGA-BRCA	TCGA-EW-A1P6	0	562	white	64	0	1	11.3783	7.48382	9.83447	6.93074	10.1228	11.4221	12.4679	9.97585	10.5118	9.71939	11.7645	11.875	12.2592	1	10.3783	11.9296	11.2216	6.80735	9.81538	11.1567	13.1165	6.79442	7.62205	10.2082	11.6658	6.14975	14.7789	10.2958	11.9748	9.99152	12.7438	9.86264	10.7928
						TCGA-BRCA	TCGA-LL-A5YL	0	519	white	64	0	1	10.1649	9.19229	8.55075	8.60363	11.0417	12.3794	13.392	9.85643	12.031	8.94544	11.2402	12.0423	10.8154	2	10.3955	12.26	12.732	8.47573	10.4409	11.6847	12.7713	7.96	6.93074	8.13955	9.85331	6.35755	15.2131	9.41996	12.097	10.6812	13.3558	13.5056	11.9633
						TCGA-BRCA	TCGA-D8-A27P	0	49	white	64	0	1	12.0651	6.76818	10.3219	10.4019	10.5294	11.1026	12.6991	10.3004	10.5784	9.83131	11.9516	12.2309	12.7375	0.01	10.3934	11.6952	10.6475	7.52356	10.2889	11.117	12.9609	7.73471	9.31967	10.043	10.7022	7.17991	15.9478	10.1421	12.5326	10.2444	12.2043	11.2586	11.4671
						TCGA-BRCA	TCGA-5L-AAT1	0	1471	white	63	0	2	10.6411	7.90689	9.52748	10.1485	9.88722	10.7977	11.4057	8.73132	10.0647	7.19967	10.1254	10.4574	10.8408	3.32193	8.79766	11.2438	10.0458	8.07682	8.83289	10.3026	11.3597	7.67243	6.79442	8.00562	9.8857	7.19967	14.8618	8.41785	10.5108	7.74147	12.2805	12.2903	10.722
						TCGA-BRCA	TCGA-E9-A54Y	0	725	white	63	0	2	9.01681	5.52356	8.77479	10.3465	9.80896	12.4996	12.9681	8.0607	11.224	9.9571	9.97011	10.8872	10.2491	0.01	10.9039	11.9784	14.129	5.90689	9.68825	11.6434	12.3435	5.49185	4.85798	8.12928	10.6211	3	14.8079	8.70044	10.6366	10.4979	13.5819	11.7764	11.4273
						TCGA-BRCA	TCGA-A2-A0YG	0	666	white	63	0	2	10.5187	9.0607	9.41363	9.0634	10.9359	12.5901	13.1547	11.6582	10.599	10.3219	12.937	13.4416	11.6466	1	11.4404	12.9363	11.4594	8.20945	10.9629	12.0133	13.7342	7.94837	8.02237	9.59432	11.7507	6.49185	16.215	11.3641	12.9177	13.4752	13.4779	11.388	12.0556
						TCGA-BRCA	TCGA-GI-A2C8	0	225	white	63	0	2	11.3129	8.5812	10.8819	13.4921	11.1235	11.5751	13.0678	11.0307	10.9549	7.78136	11.9798	12.6278	13.5958	0.01	10.6439	12.6425	10.3197	8.49586	11.0954	10.9069	11.5727	10.2854	10.207	12.1646	12.3168	8.60733	15.7802	9.71596	11.5868	7.89482	12.6287	11.7288	11.3185
						TCGA-BRCA	TCGA-AN-A0XS	0	10	white	63	0	2	11.4788	8.98014	9.77149	8.37938	10.6812	11.9578	13.2309	10.3987	11.098	8.3443	11.5859	12.4043	12.4448	3	10.3891	11.927	11.1286	9.77149	10.0126	11.5142	12.9507	9.34207	8.87652	9.93958	11.9643	6.78136	16.3185	10.0056	11.8361	9.60363	12.8671	12.4043	10.8711
						TCGA-BRCA	TCGA-GM-A3NW	0	3361	white	63	0	1	11.6662	7.48382	10.0403	12.6032	10.792	11.9812	12.6981	10.5068	11.3641	9.22159	11.9054	11.6416	13.246	3.58496	11.6018	12.6393	11.7334	9.58308	10.2703	11.4998	13.2824	10.014	7.71425	13.0835	9.70908	7.65821	14.6717	10.2216	12.1434	10.4625	13.4116	11.896	12.1923
						TCGA-BRCA	TCGA-AO-A12B	0	2989	white	63	0	1	12.2796	7.81378	10.0512	8.91289	9.61287	11.7611	12.2753	10.2527	10.7271	10.2981	12.0761	12.2372	12.2279	6.22882	10.6698	11.2282	11.9665	8.27146	10.6248	11.3554	12.7151	7.73471	7.62205	8.17493	9.57932	6.50779	15.5045	9.84235	12.4226	10.9837	12.7505	13.1685	10.6466
						TCGA-BRCA	TCGA-E2-A1AZ	0	2329	white	63	0	1	10.4553	9.45533	9.61471	5.90689	10.2503	10.9915	10.1331	10.4818	10.1176	8.77808	12.4533	12.4668	10.7838	3.70044	10.9607	10.9024	10.5488	7.65821	10.4707	11.0573	13.1677	7.48382	9.14466	9.79116	11.5392	7.32193	13.7512	10.6715	11.9348	11.4455	12.3024	10.6573	10.23
						TCGA-BRCA	TCGA-A2-A0ER	0	2263	white	63	0	1	12.4226	7.74147	12.0607	11.5122	10.4231	11.973	13.2763	11.5727	11.0231	9.06878	12.5894	12.7294	12.3875	1.58496	11.2784	11.9784	11.5177	8.51175	10.8688	12.6508	13.8169	7.91289	8.32643	10.4858	10.5622	7.14975	16.4508	11.2348	14.0287	11.9582	13.3292	12.0406	11.2052
						TCGA-BRCA	TCGA-B6-A1KI	0	2236	white	63	0	1	11.9776	8.45533	10.7748	12.2061	10.5943	11.7838	13.0926	10.5226	11.2015	9.13699	12.36	12.7561	13.329	2.32193	11.3734	11.9233	11.5656	10.5058	10.7296	11.5821	13.3061	11.0526	10.7952	10.7549	9.61839	9.12412	15.5424	10.0674	12.8908	9.68825	12.7595	12.1545	11.8823
						TCGA-BRCA	TCGA-A2-A0CY	0	1673	white	63	0	1	9.48784	9.3015	8.06609	4.9542	10.6961	13.8631	12.0993	9.70044	10.7797	7.34873	11.2732	12.6165	11.7065	3.58496	11.0895	11.927	12.3589	7.08746	10.9801	11.4548	12.7723	5.90689	5.35755	11.224	11.1085	7.43463	16.0856	9.28771	11.0875	10.4553	13.3313	9.88722	11.9912
						TCGA-BRCA	TCGA-E9-A1RH	0	1417	white	63	0	1	13.4253	11.2906	12.1523	5.42626	10.0674	12.0825	13.3344	11.0341	11.9524	10.5527	13.3725	14.2182	14.8259	1.58496	11.851	11.4863	11.8937	6.45943	11.0539	12.2306	14.7623	8.59991	8.33092	9.43254	12.7138	7.49985	16.9161	12.1092	13.4261	15.575	13.3451	11.4336	11.4517
						TCGA-BRCA	TCGA-BH-A0DH	0	1156	white	63	0	1	11.5727	7.61471	9.52943	13.1874	10.4062	11.7723	13.5787	10.3923	10.9687	8.15987	12.0123	12.5701	13.8445	3.70044	11.7423	13.7598	11.9425	8.81057	10.544	11.6344	13.2808	7.94251	8.19967	10.5546	10.2107	5.88264	16.369	10.6511	12.7692	10.9744	12.9529	12.1592	10.1267
						TCGA-BRCA	TCGA-BH-A0DI	0	912	white	63	0	1	11.1111	9.01123	11.0417	8.69349	11.2662	12.2906	12.349	9.90539	10.7254	10.6193	11.6978	11.9473	11.1586	1.58496	10.3038	11.9207	11.5627	9.96145	9.85175	11.1886	12.1173	9.25503	9.66356	10.4263	10.5527	9.10066	15.7378	9.20945	11.5622	10.4727	12.5779	11.4954	10.2586
						TCGA-BRCA	TCGA-EW-A1OY	0	908	white	63	0	1	11.4035	9.0607	10.769	9.03342	11.1561	12.5287	12.4878	11.4168	10.4009	8.0607	11.8564	11.952	12.3669	1	11.5906	11.8364	12.8414	7.58496	10.388	11.8971	13.7823	7.65821	7.31288	10.6537	11.2088	6.33985	15.4691	10.7846	12.6025	10.8478	13.0745	11.6974	11.6253
						TCGA-BRCA	TCGA-A7-A0DC	0	906	white	63	0	1	11.4993	6.84549	10.0224	11.6239	10.3923	10.255	11.0396	11.0334	9.9263	5.58496	12.381	13.0208	13.6428	1.58496	9.5411	11.1491	11.2294	7.97154	10.2574	11.0782	12.856	8.32193	9.24555	13.2001	12.0303	8.02237	14.7076	11.6658	12.863	8.89482	12.0802	10.2889	11.0641
						TCGA-BRCA	TCGA-AC-A4ZE	0	890	white	63	0	1	12.1652	8.29462	11.1079	11.8677	10.6987	11.5878	12.7432	10.7532	10.7707	9.62753	11.0049	12.3764	13.0848	1.58496	10.4009	12.8035	11.0396	10.643	10.9285	11.6896	13.2055	10.2444	8.72451	9.83131	10.2935	7.96578	15.367	10.6926	12.6584	10.5401	12.7404	11.9791	11.0035
						TCGA-BRCA	TCGA-E9-A5UP	0	803	white	63	0	1	10.0741	8.46352	11.5522	7.93074	10.585	12.1542	12.5132	10.668	10.6653	8.32193	11.8178	11.969	12.9272	1	10.2808	11.6542	11.7511	5.04439	10.2668	11.3767	12.8049	6.08746	4.45943	7.21917	11.1447	4.80735	14.7497	9.5411	11.5421	8.71081	11.7793	13.0343	11.7398
						TCGA-BRCA	TCGA-A2-A0YD	0	769	white	63	0	1	11.8061	9.43463	11.2461	10.0928	11.3608	11.3236	12.9185	10.7465	10.769	9.19476	12.1883	12.1532	12.3813	2	10.4231	11.856	10.5507	10.5187	11.4078	11.6402	12.7076	9.96145	9.97728	10.7499	10.6193	8.13443	16.0385	10.2252	12.4406	10.8392	12.5314	13.108	11.0272
						TCGA-BRCA	TCGA-A2-A1FZ	0	683	white	63	0	1	11.6321	8.69349	10.5333	11.314	10.8049	12.1542	12.2929	11.0928	10.4969	8.5157	11.9125	12.6223	11.8186	2	10.1202	10.792	10.6609	10.3026	10.1787	11.137	12.6039	10.2408	8.53916	12.7097	10.5831	7.72792	15.2088	9.87036	12.3737	9.99435	12.4268	12.1787	10.4979
						TCGA-BRCA	TCGA-BH-A18H	0	652	white	63	0	1	10.5294	8.40514	9.91588	7.82655	10.2336	12.3824	12.537	10.1033	10.6996	8.71081	11.703	12.099	13.0851	2.58496	10.7415	11.5382	11.3608	7.80735	10.3129	11.7895	13.0381	7.86419	8.41363	9.33316	10.4818	7.93074	15.4149	10.4553	11.736	8.96578	13.7457	12.9839	10.6751
						TCGA-BRCA	TCGA-GM-A5PV	0	412	white	63	0	1	11.5362	7.30378	9.19476	11.0587	10.4919	12.0871	12.592	10.5206	11.576	9.23601	11.4969	11.8017	12.4315	1	11.1523	11.7603	11.6604	8.59619	10.4512	11.6799	12.8498	8.77808	5.97728	11.4331	10.6284	7.11894	15.8936	9.39874	11.8202	8.88264	13.4392	11.6578	10.4242
						TCGA-BRCA	TCGA-A7-A3J1	0	343	white	63	0	1	11.6987	9.78953	12.1367	11.9908	11.8803	12.4976	12.9661	11.2372	11.2306	10.6707	12.5718	12.5071	12.4602	5.32193	10.764	12.4704	11.0788	10.6591	11.5333	12.2485	12.7026	10.5934	9.75656	10.6239	11.4707	8.83605	15.0797	10.1523	12.6022	9.38802	13.1938	13.5194	11.9542
						TCGA-BRCA	TCGA-E9-A1R6	0	339	white	63	0	1	10.8796	8.89482	11.2779	7.64386	11.2814	12.014	12.8584	11.062	10.9084	8.20945	12.097	12.3399	13.3947	1	10.9636	12.576	11.9222	7.96578	10.5555	11.7748	14.2553	7.86419	7.47573	10.6883	10.4429	5.49185	15.9462	11.2312	12.7773	11.4676	12.5718	11.8086	11.1599
						TCGA-BRCA	TCGA-E9-A2JT	0	288	white	63	0	1	10.6715	9.18239	10.236	10.444	10.3343	10.9951	11.3652	11.1085	9.96723	7.45943	10.973	11.0627	11.2312	4.90689	9.45327	10.9901	8.73809	9.76321	10.1911	10.7372	11.4993	8.96	7.53138	9.59246	11.567	7.71425	14.0881	9.0954	10.9837	10.4189	11.6746	11.8262	10.058
						TCGA-BRCA	TCGA-AN-A0FT	0	214	white	63	0	1	11.3432	9.41996	9.10591	12.102	10.6689	13.4497	13.4003	9.90689	11.8474	11.9979	11.3134	11.6348	12.1709	1	11.4362	11.5608	13.0047	9.53138	11.1649	12.2174	13.48	8.77149	8.60733	9.24079	10.4543	5.35755	15.2846	10.2597	10.7322	9.69174	13.9122	11.1427	11.9676
						TCGA-BRCA	TCGA-E9-A1R5	0	92	white	63	0	1	11.4362	8.53916	11.0728	7.64386	10.8895	11.821	14.0062	10.3004	10.7211	6.72792	12.5651	12.8663	13.5211	1	11.5493	11.6711	12.4674	8.41363	10.599	11.8777	14.1627	8.69697	8.57365	9.06609	11.4888	8.50383	15.6503	11.5053	12.6817	10.5507	12.5095	11.6578	13.356
						TCGA-BRCA	TCGA-A2-A0SY	0	1347	white	62	0	2	11.9125	8.40939	10.9672	9.62936	10.8242	11.9823	13.0403	11.2131	10.9366	8.67243	12.145	12.4888	12.1889	3.70044	10.7271	11.7887	11.6948	10.0928	10.3072	11.527	13.2405	10.2336	9.08481	12.1611	10.8329	8.57743	16.0343	10.1383	12.6722	10.9643	13.5854	13.3004	11.1824
						TCGA-BRCA	TCGA-D8-A1X8	0	783	white	62	0	2	12.4049	8.32193	11.2952	11.1886	10.9866	11.3685	12.8956	11.1923	11.0755	8.91886	12.3639	12.7682	13.4689	2	11.5575	11.0901	11.3259	9.67948	10.8742	11.8684	13.4867	10.2348	9.39017	10.5632	10.5265	8.53138	16.0323	10.545	12.5191	11.5751	12.7797	12.474	11.3359
						TCGA-BRCA	TCGA-E9-A1RG	0	647	white	62	0	2	10.5157	10.0334	10.9241	6.2854	11.2715	13.5422	12.8345	9.59991	11.3821	10.1241	11.1812	12.0327	10.6511	5	12.2726	12.8351	12.1497	8.03892	10.6564	11.1357	13.5986	7.78136	6.50779	7.43463	9.91588	5.72792	16.0063	10.236	11.1085	11.0701	13.0592	12.814	11.8681
						TCGA-BRCA	TCGA-A2-A4S2	0	643	white	62	0	2	10.2046	8.66178	10.3674	11.3465	10.683	11.7515	11.9024	9.96	10.3729	9.21917	11.3636	11.4707	12.6553	3	10.2819	11.4762	10.4564	8.50779	12.0279	10.5565	12.3589	8.14466	7.44294	10.851	10.2796	8.22882	15.0863	9.97585	11.1886	9.20457	12.2773	13.4631	10.9396
						TCGA-BRCA	TCGA-A2-A1FW	0	528	white	62	0	2	11.8533	6.6865	9.73978	10.5314	8.59991	12.9485	12.4022	11.9016	10.8796	8.87036	11.8309	13.1658	14.6222	3	10.5689	11.1548	13.8181	8.62571	11.6036	11.1793	13.7998	8.64386	9.20701	11.3565	12.431	7.02237	15.9931	10.9908	13.9533	12.4916	13.447	10.7296	10.7194
						TCGA-BRCA	TCGA-B6-A2IU	0	5176	white	62	0	1	11.3515	5.39232	9.04166	10.2264	9.44087	10.7566	12.3529	9.88722	9.80574	6.2854	10.0014	11.0708	11.6917	2	9.68124	10.7814	10.2621	7.7211	10.3026	10.021	12.1561	7.94837	6.84549	10.3219	9.84235	6.04439	14.34	9.0634	11.6613	9.08746	11.7415	11.0539	11.0974
						TCGA-BRCA	TCGA-A2-A0ST	0	3017	white	62	0	1	11.1033	10.1215	10.8471	10.1699	11.4205	12.0196	11.896	11.1861	11.1383	8.02237	12.8796	12.354	11.4512	4.85798	11.2831	11.8603	10.9651	9.69174	11.3783	11.8906	12.5974	9.75656	7.24793	9.25974	12.0607	7.88264	15.5422	10.4305	11.87	11.7928	12.7979	13.5682	11.4732
						TCGA-BRCA	TCGA-GM-A2DB	0	2406	white	62	0	1	9.42417	8.93074	8.25739	6	8.86419	12.9164	11.2621	9.56986	11.8459	7.20945	10.1624	11.6671	12.5507	4.16993	11.5088	11.5299	12.0317	6.18982	10.5362	11.4722	13.0439	6.26679	5.83289	7.45943	10.4051	5	15.5663	9.41363	10.9908	11.6821	12.9737	11.2779	10.7499
						TCGA-BRCA	TCGA-BH-A0DE	0	2372	white	62	0	1	11.4823	9.14466	10.9359	9.72281	10.5527	11.463	12.4271	10.7789	11.204	9.99294	11.1693	11.9833	13.5825	2	11.144	12.0095	11.2744	10.4828	10.7457	11.5294	13.0382	9.29002	9.79766	11.6348	10.8872	7.44294	15.1971	10.2216	12.03	9.73471	12.4284	11.9744	11.2761
						TCGA-BRCA	TCGA-A2-A04T	0	2246	white	62	0	1	11.3185	9.2503	11.8607	7.97154	11.0868	12.8648	12.1765	11.4584	12.1424	11.3548	12.6055	12.816	12.0258	2	12.1137	11.9106	11.9159	8.32643	10.4051	12.9475	15.162	7.10852	6.12928	9.38802	12.1098	6.45943	16.1079	12.6472	13.5488	12.6133	14.0896	11.7249	13.1649
						TCGA-BRCA	TCGA-AR-A5QM	0	2231	white	62	0	1	11.1618	9.04166	10.3761	8.97728	10.8455	11.8029	12.0944	9.65284	10.6393	10.6511	11.8494	11.4625	11.9926	3.32193	10.5925	12.605	10.3072	9.59805	10.5236	10.7134	12.236	9.05257	8.81698	9.85643	10.2621	7.53138	15.2885	9.48985	11.5053	10.584	12.674	12.292	10.6036
						TCGA-BRCA	TCGA-AR-A255	0	2161	white	62	0	1	11.7682	9.41996	10.9651	10.6917	10.7756	12.1013	13.2336	10.9388	11.0056	9.42206	12.7391	13.5343	12.2064	2	10.8619	11.3348	12.2589	9.15987	11.5976	12.6885	13.5534	9.00562	9.45943	11.0526	11.8154	7.9542	15.7485	10.8098	13.0593	11.576	13.3254	11.9944	11.4773
						TCGA-BRCA	TCGA-BH-A0DX	0	2156	white	62	0	1	10.7985	8.85798	10.5038	9.01959	10.4858	12.8398	13.3786	10.1687	11.2015	10.0688	12.0011	12.568	12.4571	2.58496	10.2842	11.9133	11.2131	10.032	10.3106	11.6452	13.31	10.3264	9.43879	9.64205	11.1176	7.76818	16.5761	10.0741	12.5718	11.3202	13.3979	11.8242	11.098
						TCGA-BRCA	TCGA-A2-A0EY	0	1925	white	62	0	1	10.5088	8.43879	10.1007	11.6587	10.4727	12.0007	13.022	10.6644	11.7026	10.6591	12.0631	13.0926	13.198	6.22882	9.63118	13.1103	11.6804	8.64386	10.6627	11.6533	12.6883	8.04985	8.42206	8.98584	12.6246	7.37504	15.8625	9.86882	12.0227	12.0668	12.3542	12.7041	10.9556
						TCGA-BRCA	TCGA-A2-A0YI	0	1505	white	62	0	1	12.6885	8.15482	11.0244	9.71596	11.5294	11.952	13.2006	11.2003	11.2396	6.30378	12.3049	12.7095	13.0787	3.70044	11.128	12.4517	10.9723	9.04439	10.9218	11.8317	13.2848	9.12153	9.51175	11.0478	10.9636	8.36632	16.4049	10.8525	12.375	9.49386	13.5967	12.2883	11.6768
						TCGA-BRCA	TCGA-BH-A0C0	0	1270	white	62	0	1	10.9211	9.66356	10.7372	10.7364	10.0417	12.935	12.3723	11.3371	10.7707	10.6952	12.0934	12.8134	12.0694	3.80735	11.3343	12.3731	12.3845	7.70044	10.6671	11.6852	13.8158	7	6.35755	8.57365	11.2538	5.97728	15.7482	11.032	12.0778	11.8673	13.4069	13.1971	11.4231
						TCGA-BRCA	TCGA-E2-A14R	0	1174	white	62	0	1	13.0735	8.17493	10.4409	3.70044	11.0396	13.2169	12.2811	11.2946	12.1261	8.56986	13.1126	13.6513	11.6457	1	11.5906	11.8134	12.5462	7.3837	11.2408	12.2033	13.7755	6.78136	6.78136	8.633	11.5845	4.85798	15.484	10.9344	12.4548	11.9403	13.4798	13.4537	11.2621
						TCGA-BRCA	TCGA-A7-A0DA	0	1085	white	62	0	1	11.9531	8.90388	11.941	6.9542	12.2339	11.4502	11.883	10.697	11.5294	9.71939	13.1707	12.7578	12.8126	2	10.7082	13.4388	11.3276	7.45943	10.4645	12.403	12.5946	6.72792	8.69697	9.58308	12.7459	5.35755	16.7587	10.3038	11.0369	11.5527	13.2281	12.3872	13.0111
						TCGA-BRCA	TCGA-BH-A0AY	0	777	white	62	0	1	11.0196	9.79604	10.2095	11.2131	10.6537	12.0563	12.6172	10.115	10.6609	11.0258	12.1309	12.3072	11.4666	0.01	10.6519	12.0144	11.4553	10.3542	10.1434	11.4949	13.4524	9.76984	8.40939	9.79279	11.6852	7.87652	15.7418	10.5689	11.7419	11.1046	13.124	12.0798	11.6961
						TCGA-BRCA	TCGA-A2-A0T4	0	624	white	62	0	1	10.6448	8.87958	10.7415	8.37069	10.2877	11.5088	12.7574	10.7168	10.8098	8.66534	11.5088	12.2758	11.908	2	10.9936	11.2627	11.3498	9.9629	10.2228	11.2155	12.7311	10.1749	8.37504	12.3498	10.0755	8.07146	15.0771	9.93074	12.7507	11.6083	12.9537	12.9031	10.6448
						TCGA-BRCA	TCGA-AC-A23C	0	585	white	62	0	1	12.0512	8.03342	10.3923	9.34873	11.0505	12.3387	13.6133	11.2697	11.4263	10.0768	12.5677	12.6193	12.8984	3.58496	10.5353	12.4189	11.5873	8.82655	10.6733	12.7897	13.7374	9.05799	9.07682	10.7499	11.7507	8.224	16.6409	10.7142	13.5563	11.3326	13.3558	12.7509	11.5162
						TCGA-BRCA	TCGA-D8-A1JE	0	575	white	62	0	1	12.0074	8.7039	11.2709	7.76155	10.6528	11.0423	13.1684	11.5727	11.5911	9.68475	12.4375	13.2354	12.2615	1	12.4289	10.93	11.1636	7.91886	11.0934	11.902	13.2889	8.04985	9.04712	10.2143	10.9549	7.57743	15.954	10.774	13.0995	12.6808	13.6703	11.5377	10.8826
						TCGA-BRCA	TCGA-D8-A1XB	0	552	white	62	0	1	11.1427	8.34873	10.4305	7.52356	10.927	11.4507	12.2186	10.1072	10.098	9.85953	11.5088	11.9065	12.0213	1	9.95274	11.5765	10.8773	7.64386	10.4126	11.368	13.2873	7.3837	8.75154	11.0647	10.643	7.56224	15.3498	10.2703	12.3329	9.82655	12.1808	11.5948	11.3669
						TCGA-BRCA	TCGA-A7-A4SC	0	446	white	62	0	1	10.3587	8.67243	10.6138	11.8037	10.3554	11.0888	11.7932	9.94691	10.1599	8.69349	11.7789	11.8424	11.9341	2.80735	10.0293	11.1202	10.1611	9.39446	9.48985	10.9873	12.1777	9.93221	8.52748	9.64926	10.1548	7.76818	14.8981	9.46557	11.5962	9.49386	11.446	12.4861	10.7099
						TCGA-BRCA	TCGA-D8-A140	0	403	white	62	0	1	11.8029	7.97728	11.2348	9.40939	10.6777	12.1674	12.7842	11.2952	9.97298	7.70044	11.8082	12.1186	13.4331	2.32193	11.3134	11.5793	12.4926	8.3966	10.6257	11.1755	13.1752	8.65821	8.93369	11.8005	11.5507	7.50779	14.962	10.6582	12.9787	10.3696	12.1605	13.5559	11.683
						TCGA-BRCA	TCGA-D8-A27V	0	381	white	62	0	1	13.168	7.90689	11.327	12.1596	11.4435	11.557	13.3945	11.0369	11.5132	8.7211	13.1954	12.7002	14.3114	3.58496	10.5699	11.9556	12.7127	9.52552	11.8463	12.1232	13.7739	10.6537	9.73471	11.3315	11.8222	9.21675	16.4433	11.6742	13.4839	12.1849	14.4273	11.6869	12.4147
						TCGA-BRCA	TCGA-BH-A0GZ	0	328	white	62	0	1	10.2819	8.92481	9.98726	8.26679	9.97728	12.856	13.0427	9.77479	11.8937	9.40301	11.117	11.9687	12.5658	1.58496	11.7591	11.883	11.917	8.21432	10.3729	12.0658	12.7655	8.66178	8.75154	10.7022	11.041	8.14466	15.9569	9.33539	12.292	9.98299	12.9607	10.6101	11.2732
						TCGA-BRCA	TCGA-A7-A3IZ	0	322	white	62	0	1	11.9121	6.40939	10.8146	12.9846	11.0458	11.242	12.461	11.96	10.6874	8.16491	12.1997	12.1624	12.7545	1.58496	10.7423	12.2128	10.8887	7.86419	10.3587	11.8819	13.0142	8.82018	8.14975	13.2047	10.3174	8.33092	14.7111	10.3185	12.7099	10.3565	13.7037	11.8784	11.4858
						TCGA-BRCA	TCGA-A7-A3J0	0	313	white	62	0	1	12.0341	8.45533	12.5656	7.13955	11.7266	12.8588	13.1341	10.8106	11.6555	9.59619	12.5519	12.807	13.4192	7.81378	11.7603	12.8311	12.2213	8.94544	11.1183	12.551	13.7407	8.49586	12.3309	8.84235	11.0821	6.30378	16.6092	11.1799	13.0301	11.3437	13.4551	12.6325	11.9118
						TCGA-BRCA	TCGA-AN-A0FL	0	231	white	62	0	1	11.9211	8.59619	9.13955	3.32193	11.5474	12.672	12.6117	9.87652	10.7855	10.7599	11.8214	12.0262	12.5672	1	11.236	12.5824	11.4813	8.31288	10.1948	12.4661	13.0946	7.09803	9.13955	11.896	10.8154	5.39232	15.6008	10.1935	11.6266	9.31288	13.2919	11.2568	12.1392
						TCGA-BRCA	TCGA-AN-A049	0	19	white	62	0	1	11.1357	8.83289	10.42	9.70736	10.9129	11.815	12.8644	10.0389	11.0244	8.2384	12.1904	13.2154	10.3923	1.58496	10.6036	11.4666	12.0808	9.16239	11.3426	10.7871	12.3309	9.04985	8.01123	10.6321	10.5469	6.90689	15.9801	9.22882	12.6287	11.6746	12.9721	11.9586	10.421
						TCGA-BRCA	TCGA-AN-A0AT	0	10	white	62	0	1	11.8269	9.99718	12.2485	5.72792	12.203	13.2644	13.9416	11.7645	12.4571	11.6179	13.9381	14.0518	12.927	3.90689	12.8927	13.1819	13.3861	7.65821	11.4419	13.3392	14.9343	6.55459	7.24793	10.5353	12.6066	6.06609	18.0505	12.3462	14.3417	13.0084	14.3027	12.5438	13.2059
						TCGA-BRCA	TCGA-EW-A1PD	0	424	white	61	1	1	10.825	8.5157	11.3772	8.9542	11.3504	12.0175	12.5558	11.7611	10.9248	7.56224	12.4003	12.7271	11.9748	1.58496	11.8178	12.4966	12.253	10.4325	10.7591	11.7793	13.679	9.88111	10.0993	11.4974	11.0049	7.78136	15.7428	10.6339	12.2647	11.6511	13.7894	11.3977	11.0105
						TCGA-BRCA	TCGA-Z7-A8R5	0	3287	white	61	0	2	10.2479	8.71081	9.73978	9.35094	10.7194	12.3955	11.9887	8.79442	11.2709	10.5343	10.6393	10.9151	10.3465	2.58496	10.1849	11.2597	11.2732	8.82655	9.91289	10.9084	11.8591	8.35755	7.33985	9.38154	10.5594	6.35755	15.5568	8.28077	11.1124	8.37069	13.0459	12.4515	11.2167
						TCGA-BRCA	TCGA-A2-A1FX	0	1847	white	61	0	2	12.3095	9.41363	11.9873	11.137	12.6889	12.2915	13.521	12.0362	11.3718	9.77808	12.859	13.1836	13.8216	1.58496	11.7194	12.5805	12.3877	8.31741	11.6578	12.2351	14.48	9.94544	9.50383	11.1396	11.3961	8.44708	16.0151	11.7207	14.135	12.8471	12.4302	13.2196	12.708
						TCGA-BRCA	TCGA-AO-A0J9	0	1613	white	61	0	2	11.1529	9.85175	10.0498	9.68124	10.5594	12.3465	12.6362	10.2058	11.4605	8.91289	10.9958	11.8796	12.0964	2.58496	11.8098	11.8482	12.2264	11.6497	10.4126	12.4318	12.8692	10.5897	9.53333	11.2058	10.5078	7.26679	15.2122	9.29462	11.2276	10.0593	13.8153	12.2592	11.3902
						TCGA-BRCA	TCGA-D8-A1Y3	0	430	white	61	0	2	10.8186	8.81057	11.0526	11.6448	11.0614	14.1534	13.8809	10.2503	11.6515	11.2485	13.6545	13.6513	11.7207	0.01	12.1421	14.2957	14.2996	6.85798	12.4149	12.8158	14.7374	7.33092	5.90689	7.54689	10.9121	5.88264	15.9524	11.4393	14.108	11.7956	14.513	12.5936	13.2674
						TCGA-BRCA	TCGA-B6-A0WT	0	5739	white	61	0	1	10.8819	7.67948	9.15987	8.11894	10.1824	10.8803	12.2935	9.86728	9.88264	8.47978	11.5727	11.7528	11.6653	0.01	9.98584	11.0654	10.1472	6.85798	9.24555	10.8887	12.6968	7.85175	8.24317	13.251	9.74147	7.09803	14.6647	9.76321	12.0049	10.5177	12.1315	10.9425	11.1364
						TCGA-BRCA	TCGA-AO-A128	0	3248	white	61	0	1	11.794	10.3761	12.0768	10.774	12.1488	12.2503	12.7138	11.6649	11.3531	6.84549	13.5898	13.5217	12.5108	4	11.258	12.6479	11.2342	8.38802	12.2627	12.2438	12.8072	7.39232	7.12928	8.48784	13.4988	7.36632	15.8976	10.7022	12.7063	12.6638	13.9004	15.2002	12.5515
						TCGA-BRCA	TCGA-AR-A24S	0	2976	white	61	0	1	12.2183	10.0993	11.9509	7.7211	11.6284	11.7895	13.3965	11.5864	10.8065	8.35315	12.7975	13.0104	12.5941	3.45943	11.7322	12.8644	11.628	9.66711	11.5732	11.9039	14.279	9.20212	9.61102	10.4727	11.93	7.14975	15.5818	11.7372	12.2488	12.0701	13.4453	12.0858	12.1102
						TCGA-BRCA	TCGA-E2-A1IE	0	2362	white	61	0	1	12.4727	8.31741	11.8742	9.93811	11.6746	12.1605	13.3659	11.8723	11.8599	11.2562	12.9566	13.4661	15.173	0.01	11.3371	13.1998	12.7455	9.90238	11.8711	12.3902	14.2524	9.31061	8.88874	13.3318	10.9744	6.96578	16.1591	11.1662	13.3613	12.1485	14.1828	11.8941	11.8549
						TCGA-BRCA	TCGA-OL-A5DA	0	1783	white	61	0	1	10.9708	8.63662	9.28309	11.1357	11.1929	11.6733	12.3454	10.3242	11.1459	8.77808	11.411	11.4798	12.1447	3.45943	10.0954	12.1066	11.2917	7.11894	9.90689	11.5421	12.9379	7.8009	7.2854	11.2761	10.8353	7.15987	15.3948	9.72281	11.5732	8.74819	12.3853	11.9816	11.0627
						TCGA-BRCA	TCGA-E9-A1NC	0	1203	white	61	0	1	11.1453	9.27845	11.2324	7.27612	11.5416	12.0825	11.7181	9.85798	11.7478	8.59619	11.9798	12.2152	11.7211	5.67243	11.1376	12.5476	11.2544	7.53916	10.7237	11.3343	11.8174	7.67243	7.02237	8.5157	11.0634	5.80735	16.6526	8.77808	12.0498	10.2574	12.8366	13.5666	11.4189
						TCGA-BRCA	TCGA-AO-A0J6	0	1140	white	61	0	1	11.4818	10.769	13.0658	5.52356	12.5997	13.0541	12.8144	10.5372	11.9944	7.76155	13.3945	13.5696	13.5016	1	12.794	12.7993	13.1304	7.31288	11.544	13.2903	14.253	7.69349	6.50779	9.97298	13.2744	6.2854	16.2732	11.7846	13.513	13.0942	14.1036	14.2905	13.9054
						TCGA-BRCA	TCGA-A7-A13H	0	899	white	61	0	1	11.8138	9.11114	11.1655	12.3674	11.5008	11.9567	12.5873	10.8431	10.5392	9.9571	11.9837	11.7254	11.9407	4.45943	10.2562	12.437	10.821	9.05528	10.4645	11.6179	12.6595	9.54496	9.11894	10.8657	11.0084	7.34873	16.066	9.74483	12.1102	9.58496	12.737	13.4031	11.7855
						TCGA-BRCA	TCGA-LL-A440	0	759	white	61	0	1	11.444	9.5411	12.3482	10.599	11.8106	12.1472	11.917	10.6064	10.7048	9.39446	11.8086	11.7863	11.3821	4	10.5018	12.6693	10.5746	11.4476	10.2456	11.2101	12.3685	11.4873	9.84862	11.2969	11.2258	9.84392	15.561	9.98868	11.9355	9.65642	12.2779	12.2378	11.3772
						TCGA-BRCA	TCGA-E9-A1QZ	0	755	white	61	0	1	12.0283	9.59619	11.7956	9.64926	10.9166	11.713	13.1796	11.7515	11.4051	9.17742	12.4338	12.895	12.0151	3.80735	11.4533	12.0898	11.7398	11.647	11.5479	12.4128	13.6729	11.1111	8.95128	10.5206	11.9622	8.18488	15.3828	10.6008	13.3666	11.8849	12.9764	13.3644	11.9986
						TCGA-BRCA	TCGA-E2-A156	0	726	white	61	0	1	11.1325	6.72792	9.02514	11.6773	9.95565	10.1228	11.6452	9.33092	10.0293	8.10852	11.2003	11.7013	12.0423	0.01	9.22159	10.6944	9.97441	7.03342	9.8009	10.3987	12.3869	6.44294	6.65821	6.97728	9.62753	5.70044	14.5387	9.61655	11.5694	9.44294	11.3304	10.8353	10.2981
						TCGA-BRCA	TCGA-E2-A15C	0	694	white	61	0	1	11.8486	7.67948	9.43671	8.90989	9.72962	11.1241	12.7138	10.3197	10.8321	9.02791	11.9039	12.0509	13.0748	0.01	10.3498	12.0028	10.3387	7.92481	10.4073	11.4435	13.0509	7.91289	8.54689	12.4218	12.164	6.67243	15.4712	10.2479	12.098	9.11894	12.4305	10.5147	10.6917
						TCGA-BRCA	TCGA-AO-A0J8	0	680	white	61	0	1	12.5167	9.03892	10.8471	11.5103	11.6321	12.4009	13.4134	10.9527	11.7616	10.6138	12.7775	12.8196	13.5272	1.58496	11.4393	11.368	11.9947	7.98868	11.4094	12.1627	13.3184	8.34873	8.36194	8.94544	10.7607	6.24793	17.3906	10.5613	13.3059	11.0389	12.8942	13.0062	11.2703
						TCGA-BRCA	TCGA-E2-A15P	0	595	white	61	0	1	11.4522	8.5157	11.1286	10.352	11.5425	12.0515	13.3058	11.5043	11.3696	8.91289	13.022	13.1115	13.0639	2.32193	11.4147	12.2574	11.6452	9.25739	11.1836	11.9207	13.2397	9.49985	9.7211	11.7004	11.4142	7.65821	16.1897	10.5333	13.4066	10.2288	13.4143	11.7134	11.5627
						TCGA-BRCA	TCGA-A2-A0YK	0	588	white	61	0	1	11.7198	8.87344	11.6569	11.9819	11.0795	11.5167	11.9418	10.9388	10.7624	9.78627	11.8963	12.3826	13.55	3.70044	10.3004	11.6658	9.80252	10.7474	10.6156	11.3061	12.7522	10.6275	10.0928	11.6248	11.6133	9.10066	15.3226	10.3848	12.2046	10.5127	12.1954	12.0137	11.764
						TCGA-BRCA	TCGA-D8-A1XT	0	506	white	61	0	1	11.9679	10.1202	10.6018	6.06609	11.8317	12.6638	13.5984	11.5845	11.7944	9.66534	12.8303	13.9116	13.6843	3	10.6384	11.8474	12.4826	9.55075	12.1059	14.527	13.8041	9.28077	10.0674	10.4898	12.5214	7.71425	16.6589	11.1396	13.5454	12.6524	14.2584	13.1608	11.3869
						TCGA-BRCA	TCGA-EW-A1J3	0	504	white	61	0	1	11.8467	8.62205	9.52943	11.5897	10.0928	10.8017	13.1026	12.0768	11.7557	9.65105	11.8925	12.8504	13.8029	2	11.6484	11.5708	11.3723	7.55459	11.2252	11.8521	13.9014	7.87652	8.33092	12.2491	11.1997	7.02237	15.6735	10.5196	12.8031	11.0112	13.8379	11.6298	11.838
						TCGA-BRCA	TCGA-A1-A0SG	0	434	white	61	0	1	11.3134	8.21432	9.96723	9.72451	10.1662	11.8781	13.3902	10.007	10.8588	10.3365	11.807	12.2837	12.3188	4.16993	9.99152	12.2396	11.357	8.3966	10.1472	11.9136	12.8644	8.10329	8.45121	9.38802	11.6275	6.78136	15.6193	9.76155	12.1911	9.80896	12.713	11.6987	10.3421
						TCGA-BRCA	TCGA-AN-A0FN	0	218	white	61	0	1	11.3083	10.0566	10.9366	10.3298	11.0761	11.4742	12.3842	11.592	11.3304	7.70736	11.7074	12.1892	11.9618	2.58496	10.9091	11.6865	11.1886	10.6027	10.7789	11.4115	12.5155	10.4409	10.8719	11.1472	11.5779	8.49185	16.0067	9.97585	12.0317	10.7322	12.7971	12.4294	10.8895
						TCGA-BRCA	TCGA-AN-A0XL	0	163	white	61	0	1	11.7478	8.33539	10.9462	11.937	10.8657	11.2119	12.2784	10.6847	10.5206	10.3197	11.611	12.3628	12.5969	2.32193	10.3049	12.5767	11.5421	11.3117	10.676	11.5793	12.8106	11.1954	10.7448	11.6083	11.6896	8.49586	15.3921	10.2348	12.8017	10.6421	12.4176	11.3691	11.1624
						TCGA-BRCA	TCGA-BH-A6R9	0	160	white	61	0	1	10.7099	9.97728	11.6821	7.41785	12.0624	11.6008	11.7048	10.2503	10.4919	5.75489	11.5962	11.6289	11.5328	2.58496	11.1013	11.9506	11.3955	8.50779	10.0471	11.115	12.0011	9.01959	10.6064	9.97585	11.0217	9.30378	16.3588	9.81698	11.5555	10.1163	12.4911	13.4721	11.6904
						TCGA-BRCA	TCGA-A2-A0CK	0	4159	white	60	0	2	11.3966	8.5157	10.9701	9.87191	11.2432	11.9571	12.2834	10.599	11.3197	9.43254	11.611	11.556	11.463	2	10.2958	12.2518	11.6008	10.1699	10.255	11.3891	12.5911	9.87036	8.47573	9.72281	11.6542	7.42626	15.2503	10.0042	11.9593	10.2033	13.5551	12.5668	11.2808
						TCGA-BRCA	TCGA-AR-A1AL	0	2971	white	60	0	2	12.461	8.29921	11.6944	10.4898	11.032	11.1954	12.6337	10.9054	10.7482	9.31741	12.3424	12.5481	13.0095	2.80735	11.0042	11.4914	10.6339	10.6475	11.0961	11.7553	13.4128	10.6101	10.3264	11.5454	10.8416	9.0607	15.8708	10.4988	12.6689	10.2312	12.3387	10.3174	11.6935
						TCGA-BRCA	TCGA-BH-A0BC	0	974	white	60	0	2	11.6307	9.63481	11.3756	11.0403	11.3038	12.7553	13.2701	11.7536	11.3767	10.7305	12.1938	13.2881	12.9222	2	11.6751	12.4268	12.9596	10.2633	11.3044	11.8459	13.7276	10.2877	9.33092	12.7969	11.0715	8	16.8679	10.9484	12.6319	12.1975	13.7528	14.1455	10.8041
						TCGA-BRCA	TCGA-E9-A5FK	0	812	white	60	0	2	9.72281	9.45738	9.67772	11.2467	10.6555	12.6537	11.9905	9.3443	11.6948	8.69349	10.5878	11.1312	11.2095	3.58496	10.0403	12.2306	11.4455	10.1163	10.4909	10.6698	11.0526	9.87191	7.13955	9.0634	10.6402	8	15.4805	7.87036	11.0341	9.33092	12.9163	13.6471	10.9658
						TCGA-BRCA	TCGA-D8-A1JA	0	502	white	60	0	2	12.3083	8.22882	10.043	12.1447	11.3701	11.7826	12.6944	12.2524	11.6234	11.062	12.9434	13.8968	15.0997	0.01	11.2998	11.1984	14.3005	6.18982	11.0126	11.6239	14.5562	6.37504	9.01681	13.6885	11.6627	9.03342	16.7281	11.9661	13.6564	12.6457	13.8521	9.65284	12.2461
						TCGA-BRCA	TCGA-B6-A0RN	0	8008	white	60	0	1	11.8317	8.65105	9.39874	7.77479	10.567	11.6275	12.5553	10.6865	11.1408	9.7211	11.6375	11.5703	12.0921	3	10.7789	11.007	11.3712	7.80735	10.2432	11.1529	12.6555	7.87036	8.21917	11.5641	10.8978	7.44294	15.3657	10.5641	11.911	8.53528	12.178	11.2866	12.1523
						TCGA-BRCA	TCGA-A2-A0CP	0	2813	white	60	0	1	10.0526	7.89482	9.6987	7.62936	10.1812	11.6768	11.8761	8.59991	11	10.363	10.8258	11.2204	10.5167	2	10.3652	11.3886	11.4105	8.8392	9.41785	10.9315	12.2697	8.85798	7.90087	9.44294	10.3106	6.88264	15.2715	9.1267	10.8925	7.11894	12.3731	10.5362	10.6018
						TCGA-BRCA	TCGA-BH-A0HY	0	1545	white	60	0	1	10.1861	8.16993	9.88874	11.9762	10.1331	12.0931	12.9776	10.7313	10.6275	12.1212	11.7528	12.9906	12.2294	1	10.2644	12.9717	12.463	8.92778	10.4019	12.1306	13.3656	8.36632	9.08746	9.68299	11.6812	6.26679	15.9603	10.3287	12.416	11.5962	14.1242	12.2805	11.461
						TCGA-BRCA	TCGA-BH-A202	0	795	white	60	0	1	12.7198	8.79442	11.0587	8.09276	11.1892	12.2134	12.6994	11.6587	11.1402	10.2969	13.5375	14.2829	13.2017	4.16993	12.3326	12.3233	12.8291	8.03342	11.7004	12.3081	14.686	7.91886	9.35975	10.3531	13.7039	7.46761	17.5326	11.9986	14.2063	13.1033	14.4355	12.451	13.2357
						TCGA-BRCA	TCGA-E2-A1IN	0	675	white	60	0	1	11.9629	8.37069	10.4273	7.30378	11.3032	13.0488	13.2955	11.2137	11.3026	8.80735	12.6773	13.0358	12.8275	1	11.5221	12.0502	12.2541	8.53528	10.9866	11.7482	14.0373	8.83605	9.4818	12.6344	12.0172	7.02237	16.5327	10.978	12.9244	10.3729	14.0605	11.5023	11.7427
						TCGA-BRCA	TCGA-BH-A0DP	0	476	white	60	0	1	11.672	7.82655	10.5353	9.01402	10.96	11.5147	12.9144	10.5746	10.5362	8.75822	11.0272	12.0705	12.4858	2.32193	10.8796	11.8435	10.8001	9.19722	11.8142	10.7649	12.5236	9.43254	8.72451	10.7822	10.3231	7.59246	15.1562	9.98584	12.5085	9.65105	12.2015	12.3559	11.8098
						TCGA-BRCA	TCGA-E2-A1IU	0	337	white	60	0	1	11.341	7.33092	10.9723	10.4168	10.6027	11.4157	12.4165	10.4543	11.1222	8.76155	11.9012	12.3443	11.9196	1.58496	10.3376	11.9315	10.7194	8.20457	10.2119	11.5226	13.1779	8.56986	8.03892	10.2842	10.7288	7.7211	15.6439	10.2252	12.7033	9.94691	12.3259	12.1558	10.9241
						TCGA-BRCA	TCGA-BH-A0BZ	0	2255	white	59	0	2	11.3493	9.87652	11.1408	10.6511	11.3815	12.6085	13.5786	10.5925	11.188	13.2996	12.3214	12.7438	12.2384	3.32193	10.8384	13.372	12.6484	9.01959	11.1793	12.3306	12.8757	8.62205	8.87344	9.89936	11.5003	6.58496	16.2244	10.4284	12.5108	12.7889	14.1505	14.1235	11.3185
						TCGA-BRCA	TCGA-AO-A0JD	0	2190	white	59	0	2	11.7595	8.40939	10.4848	8.65105	10.8074	11.8301	12.2411	11.9975	11.4974	7	12.6649	13.3741	13.9037	3.16993	11.9403	11.7678	12.1624	7.45943	11.0934	12.5981	14.469	7.04439	7.21917	9.19967	11.8742	6.90689	17.0028	11.8498	12.9339	12.2183	13.3689	11.4398	12.3089
						TCGA-BRCA	TCGA-AO-A0JL	0	1683	white	59	0	2	10.0512	9.50184	9.19229	5.97728	10.9929	12.4297	11.3761	9.85643	11.5803	11.2155	10.3696	11.102	10.6339	3.16993	11.2125	11.964	12.2894	8.43463	10.8803	12.2943	13.2418	7.53138	9.34873	9.37721	12.3004	7.33985	14.2195	10.2276	10.2155	10.137	13.3305	10.4645	11.5255
						TCGA-BRCA	TCGA-OL-A66N	0	792	white	59	0	2	10.769	8.9629	9.84392	10.0512	11.2149	12.4906	13.0069	9.59059	11.7457	10.6564	10.7756	11.3636	12.0084	3.32193	10.5459	13.3276	12.0694	9.63481	10.3565	11.2306	12.3688	9.56224	8.09276	8.53138	9.09803	8.02791	15.4716	9.15228	11.6243	7.65821	12.941	12.9464	10.6294
						TCGA-BRCA	TCGA-D8-A1JC	0	480	white	59	0	2	11.8246	10.4041	11.9484	10.5555	11.1737	12.0451	13.7406	12.1424	11.2952	11.2633	13.1693	13.6473	12.7795	2.32193	12.4821	12.6954	11.8427	8.15987	11.817	11.9586	14.2858	10.4242	8.96578	12.9598	12.0189	10.2503	16.3164	12.2273	12.7713	12.3636	13.2329	12.7873	12.1706
						TCGA-BRCA	TCGA-AN-A0XO	0	375	white	59	0	2	10.6027	8.82655	10.0701	9.45533	10.7406	12.3418	13.0755	11.1273	11.1768	10.6018	12.4984	13.1838	11.9862	2	11.6978	11.9636	11.8619	9.01959	10.4747	11.7956	13.8029	7.85175	8.8392	9.9629	11.9129	7.36632	16.5837	10.6952	13.0267	11.8106	13.5741	11.3923	11.9604
						TCGA-BRCA	TCGA-AN-A0FJ	0	242	white	59	0	2	10.3004	8.5157	10.3197	5	10.6978	12.2372	11.9986	9.95128	10.8642	8.41363	11.6913	12.4538	12.5875	6.08746	10.3083	12.5011	10.9866	8.82018	10.643	11.464	12.4393	7.7879	9.78627	9.74819	12.2556	6.56986	15.5102	9.5216	12.5507	11.1768	12.1137	11.3912	11.5122
						TCGA-BRCA	TCGA-AR-A0U3	0	4080	white	59	0	1	10.6935	7.98868	10.1824	9.52356	9.82496	10.4919	11.8895	10.1561	10.7715	8.50779	11.6961	12.1901	12.3985	2	11.1273	11.4974	10.3454	7.53138	10.6175	11.1059	12.0593	7.01123	6.88264	8.79116	10.5943	8.86419	14.9859	9.36851	12.9157	12.0661	11.8202	10.2935	10.5088
						TCGA-BRCA	TCGA-E2-A1LH	0	3247	white	59	0	1	9.86109	8.93958	9.7364	7.40088	9.94251	11.3432	13.0765	9.03342	11.0741	8.99718	11.783	11.3026	10.9344	2	10.4346	12.4142	11.5665	8.48382	9.81858	12.2597	12.0617	7.52356	6.55459	8.10852	10.0526	5.45943	14.4807	8.59991	10.0471	10.4727	13.2637	13.2928	11.543
						TCGA-BRCA	TCGA-BH-A0BR	0	2330	white	59	0	1	11.1874	8.84549	10.8865	7.09803	11.0748	12.1463	12.4325	9.38802	11.2627	10.744	12.1228	11.6755	12.0848	0.01	10.4388	12.0063	10.7389	8.94837	10.0821	11.4236	12.0735	8.66178	9.07682	9.34873	10.1111	7.49185	16.2583	8.97154	11.7541	11.7781	13.1136	12.7402	10.4481
						TCGA-BRCA	TCGA-AR-A2LQ	0	1233	white	59	0	1	11.7891	9.04712	11.4691	10.543	11.0587	11.218	11.741	10.1293	9.93811	9	11.3531	12.255	12.5875	4.08746	9.55267	11.4325	10.236	10.9278	10.0993	10.4767	12.2556	10.4336	10.5915	10.676	10.6402	8.8392	14.6545	9.56033	11.5887	9.90388	11.8404	11.6138	10.8918
						TCGA-BRCA	TCGA-E9-A247	0	1186	white	59	0	1	11.0532	9.0607	10.9256	6.93074	10.9009	12.1901	13.4239	11.4471	12.2384	7.07682	12.1889	12.4645	12.5807	2.58496	12.061	13.438	12.7715	8.27146	14.0385	12.3845	14.4215	8.27146	7.7211	13.6701	11.4388	7.05528	15.1841	11.8262	13.3618	11.8242	14.4982	10.568	12.2553
						TCGA-BRCA	TCGA-A2-A0YC	0	990	white	59	0	1	12.4525	8.66178	10.825	8.30378	11.2204	11.5289	13.226	11.1228	11.2509	9.03067	12.3769	12.4873	12.2228	2.32193	10.4988	11.1517	11.9392	9.33092	10.7731	11.9524	13.2496	8.87958	9.2854	10.4512	10.5333	8.02237	16.1679	10.8234	13.0107	11.8521	12.9967	13.4745	11.4569
						TCGA-BRCA	TCGA-EW-A1P7	0	915	white	59	0	1	11.2336	9.51175	11.3869	9.07414	11.268	11.7112	11.6878	10.8971	11.0217	8.97154	11.4914	12.0918	11.3083	6.16993	10.1306	11.6362	9.97728	10.062	10.3794	11.1059	11.8937	8.87652	8.54689	10.1293	12.1472	8.61471	15.4508	9.41363	12.2621	9.72622	12.2064	13.0231	10.375
						TCGA-BRCA	TCGA-D8-A1JM	0	590	white	59	0	1	12.0161	9.48382	12.9986	5.67243	11.3712	13.5372	13.8361	10.6156	11.4818	9.10329	13.0255	13.9062	13.025	2.32193	12.7339	12.2857	11.2167	10.7541	10.5088	13.0736	14.4768	6.2854	14.4764	7.6865	12.9244	8.74819	16.7767	11.5713	13.6076	13.3347	14.3018	12.3872	13.2659
						TCGA-BRCA	TCGA-EW-A1PA	0	575	white	59	0	1	10.9315	8.25739	10.8033	11.0389	10.2538	12.1846	12.1548	11.0258	11.5435	10.1434	11.9046	11.8971	12.8794	1	10.7814	13.1354	10.568	8.54303	10.6457	11.2726	13.1532	8.7211	8.48382	12.1128	10.1762	8.35315	14.9621	10.5324	11.268	10.8704	13.6044	11.1376	10.4051
						TCGA-BRCA	TCGA-A2-A0T0	0	533	white	59	0	1	11.0369	10.1599	10.3421	5.20945	11.8376	12.1418	13.6516	11.3134	11.617	9.64926	13.0473	13.9857	13.7223	1	12.8447	13.3136	13.1646	7.60733	10.8408	13.28	14.4642	6.44294	8.29002	9.60363	12.2568	6.52356	16.0718	11.5817	13.3792	13.3026	14.391	12.2621	12.8194
						TCGA-BRCA	TCGA-EW-A1J5	0	477	white	59	0	1	12.5471	10.3707	11.7283	10.6393	11.4136	11.7385	13.4118	11.5454	11.6321	10.8757	12.6874	12.9241	13.0018	3.70044	11.2738	11.858	11.8742	8.24793	12.5994	12.144	13.5507	8.74483	7.96578	11.5699	11.9443	8.69	15.5141	10.6439	13.317	11.8611	13.1763	14.005	12.2297
						TCGA-BRCA	TCGA-A1-A0SD	0	437	white	59	0	1	11.764	8.57743	10.9263	11.5892	10.6036	11.7013	13.286	10.9454	11.0355	8.72792	12.1056	12.5887	13.0067	2.32193	10.9679	11.6188	11.1209	9.67419	10.8796	11.4681	13.2389	9.42626	9.59619	11.5382	11.3939	7.90087	15.4412	10.6321	12.7429	10.6138	13.0208	12.2426	11.5167
						TCGA-BRCA	TCGA-D8-A27M	0	410	white	59	0	1	11.8102	8.61839	11.6142	8.84862	12.0607	12	13.1248	11.7499	11.2503	10.3729	12.5127	12.4414	13.0831	2.58496	11.2192	11.3026	10.7415	9.02237	10.4707	12.2015	13.3869	8.65105	9.23601	10.3869	12.4893	7.2384	16.3897	11.4752	12.6273	11.3061	13.4116	13.851	12.3278
						TCGA-BRCA	TCGA-BH-A0RX	0	170	white	59	0	1	10.3309	10.2372	10.8872	7.41785	10.6573	12.371	11.978	10.1331	11.0451	9.59619	11.7048	12.3009	11.3371	4.58496	11.7748	12.3548	12.2706	9.35975	11.5911	12.4442	12.4218	9.0607	9.33092	9.84549	12.4628	8.36194	15.3668	9.42206	12.2354	12.2808	13.5599	12.9897	12.2107
						TCGA-BRCA	TCGA-BH-A0DD	0	2486	white	58	1	1	11.0728	8.65821	11.2456	5.90689	10.5343	12.5582	12.5836	11.8293	10.2784	8.22882	12.4998	12.9792	12.1283	2	12.2729	11.2633	12.7524	6.93074	11.3247	11.9556	13.8516	7.31288	7.59991	9.04439	9.63662	6.40939	15.1815	11.1935	13.6262	11.9484	12.9357	13.1914	11.825
						TCGA-BRCA	TCGA-A2-A0ET	0	1066	white	58	0	2	12.0977	7.56986	10.4818	7.03342	11.6124	12.4406	13.6693	11.7977	11.137	8.07146	12.5425	12.9118	11.5167	2.80735	11.4979	11.6755	11.8819	8.77808	11.7748	12.6273	14.2441	8.51175	7.03342	9.27146	11.2119	6.89482	15.23	11.863	12.6076	10.1737	13.1175	10.9751	12.3086
						TCGA-BRCA	TCGA-D8-A27I	0	439	white	58	0	2	12.1102	9.01402	12.1658	11.92	11.6443	12.4419	13.2593	11.0782	11.0728	9.16742	12.5338	12.562	12.2288	3.32193	10.9542	12.8694	11.5245	11.3197	10.9031	11.8642	13.4809	11.0175	10.2033	11.2894	11.4696	9.09276	15.6254	10.865	12.8287	10.3253	13.3222	11.3214	12.5777
						TCGA-BRCA	TCGA-GM-A2DN	0	3091	white	58	0	1	11.7768	8.86419	10.5793	10.128	10.5038	11.664	12.7918	10.9965	10.9091	9.82018	11.8975	12.6207	12.1523	4.70044	11.1737	11.3247	11.2992	8.17493	11.265	11.5406	13.4268	8.37069	8.64746	9.45943	11.4742	6.6865	15.6777	10.5294	12.784	11.0355	12.8297	12.9256	11.4954
						TCGA-BRCA	TCGA-AR-A250	0	2707	white	58	0	1	11.8154	9.14211	10.2912	7.02237	10.7432	12.8626	13.3846	11.7104	11.1124	10.3652	12.9014	12.9851	13.6956	2.32193	10.5196	12.6441	15.4552	9.21432	11.5703	11.4242	13.9985	8.6865	9.91886	10.2981	12.1802	6.50779	16.4166	11.2009	13.3245	12.7035	13.0269	13.1779	11.7151
						TCGA-BRCA	TCGA-GM-A2DK	0	2645	white	58	0	1	10.8956	8.47573	10.4666	10.6715	9.89633	12.2814	10.9915	10.0782	11.7661	10.5088	10.545	11.4788	12.4255	2.32193	10.7022	12.6799	11.914	11.1344	10.8971	11.5241	12.4297	11.1991	7.96578	11.7104	10.1548	7.86419	16.8979	9.85175	11.0993	11.1007	14.3036	12.0262	10.3674
						TCGA-BRCA	TCGA-GM-A2DH	0	2193	white	58	0	1	12.1396	9.39232	12.0502	10.6653	10.8826	12.9088	13.5448	12.5746	11.3805	9.06609	13.7992	14.1423	13.0583	4.24793	12.1219	12.6713	11.6398	8.24793	10.774	12.4893	14.7766	8.52356	7.61471	9.43045	12.6907	8.17991	16.1922	12.1839	14.6712	13.6975	13.8183	12.9361	12.2076
						TCGA-BRCA	TCGA-E9-A228	0	1285	white	58	0	1	11.9578	8.89785	11.7478	11.6129	10.8811	13.2375	12.0708	12.654	11.6804	7.86419	12.8398	12.6232	15.4205	2	11.719	12.581	12.7119	9.31061	10.6944	12.1855	14.188	10.2946	8.98584	11.0668	10.6909	7.90087	15.8569	11.3734	12.7056	13.0463	14.4354	12.1039	10.6573
						TCGA-BRCA	TCGA-E9-A1NA	0	1112	white	58	0	1	10.9758	10.1447	12.062	9.20701	11.5603	13.4693	13.0678	10.9204	11.2167	9.15987	12.2375	12.8948	11.9274	3.45943	11.3432	12.2079	13.5026	7.5157	11.8929	11.7305	14.3299	7.8392	8.60733	11.3498	10.8218	7.39232	16.6971	11.4351	12.5299	12.5048	13.141	14.0319	12.6704
						TCGA-BRCA	TCGA-E9-A1N9	0	1101	white	58	0	1	10.5479	8.87958	10	6.98868	10.1536	11.5915	11.8102	11.0091	10.6221	7.60733	11.9972	12.5957	12.6998	0.01	10.1344	12.0778	11.813	8.24317	10.9211	11.5028	13.911	8.48382	8.77808	10.0265	10.6008	7.79442	14.6348	11.2088	11.8588	11.8653	12.3619	9.82972	11.062
						TCGA-BRCA	TCGA-E9-A1R0	0	860	white	58	0	1	11.9491	9.02791	11.3476	9.64386	10.9944	12.1864	13.4188	11.1536	11.3761	9.15735	11.8134	12.4163	13.3565	3.16993	10.9823	13.018	11.1105	11.6339	10.7607	11.9737	13.3153	11.1293	9.00282	10.1124	11.1079	8.33985	17.3023	10.7108	12.9213	11.2952	12.937	11.7415	11.6142
						TCGA-BRCA	TCGA-BH-A0W3	0	728	white	58	0	1	11.2825	7.63662	11.6348	12.536	10.0512	11.2119	12.4375	10.4828	10.6046	8.81057	11.363	12.407	11.0369	1	10.3026	11.5684	10.4346	7.04439	10.3487	11.2101	12.5071	7.09803	6.76818	8.3837	10.5167	5.55459	15.6155	10.0458	12.8861	12.1752	11.8408	12.2782	10.9159
						TCGA-BRCA	TCGA-E2-A155	0	640	white	58	0	1	12.3548	7.10852	11.6059	13.5095	7.84549	12.2216	12.4936	13.2467	11.2773	11.6479	12.4651	12.9048	12.8214	1.58496	11.6303	13.0401	12.1338	8.08215	10.973	12.5786	14.4673	8.49985	8.13955	10.6874	12.0881	7.33985	16.1269	11.679	13.2174	12.2735	13.3364	12.6669	11.4393
						TCGA-BRCA	TCGA-BH-A8FZ	0	574	white	58	0	1	11.5873	8.3837	11.5127	12.3786	11.8017	11.8333	12.8074	9.9629	10.8963	9.02791	12.1746	11.388	13.4086	2.32193	10.6193	12.3326	10.9636	9.00282	10.2467	11.352	13.3861	9.37938	8.69	10.0661	11.4969	8.26679	15.6945	10.6944	11.0694	9.93221	12.3376	13.2276	11.3537
						TCGA-BRCA	TCGA-E2-A15K	0	275	white	58	0	1	11.5187	8.29921	10.3565	6.12928	10.6821	11.6913	12.5442	11.0244	10.9751	10.5736	11.9531	12.3123	12.031	3	11.446	12.1724	10.9929	8.49586	10.242	11.6357	13.2599	8.30378	7	8.17991	10.6786	6.61471	16.3388	10.3576	12.9421	12.1219	12.6434	12.7752	10.4878
						TCGA-BRCA	TCGA-AN-A04D	0	52	white	58	0	1	12.3479	9.12412	10.7389	6.44294	10.4147	12.0748	13.0307	11.06	11.6991	11.6604	12.1491	14.2143	10.8681	1	11.809	12.1144	13.6756	8.59246	10.8186	12.8372	14.0735	7.57743	7.49185	9.5157	13.6788	6.47573	15.6876	10.7211	13.9861	12.9307	13.648	9.55842	13.1984
						TCGA-BRCA	TCGA-AN-A0FV	0	10	white	58	0	1	11.0768	8.64746	10.1202	6.62936	10.6564	13.1397	13.1106	10.8595	11.6461	12.4612	11.6142	13.1354	13.7091	2	10.9263	12.7175	12.0788	8.37938	9.86728	11.2952	13.7338	8.3837	8.86728	9.20212	11.5774	6.74147	16.4927	10.69	12.5976	12.2252	13.5816	13.6948	11.9643
						TCGA-BRCA	TCGA-B6-A1KN	0	4233	white	57	0	2	11.1124	9.2384	10.6724	12.2348	10.6627	12.8761	13.6068	11.5531	11.8576	10.7279	13.1347	13.6192	13.456	0.01	11.9374	12.9187	11.9975	8.82972	11.7364	11.9531	14.3212	8.83289	9.29921	12.6147	12.0265	7.20945	15.7517	11.5522	13.5109	12.722	14.3702	10.5565	11.5358
						TCGA-BRCA	TCGA-GM-A2DM	0	3226	white	57	0	1	12.3197	7.21917	10.9887	4.16993	11.3146	12.3069	12.67	10.8337	10.8218	7.74147	12.0437	12.1434	12.3918	1	10.8138	11.168	11.0627	6.82018	10.29	11.7398	13.6216	6.62936	9.41996	8.35315	10.7211	7.15987	15.5915	10.4898	11.9058	9.2384	12.7375	12.7877	11.3026
						TCGA-BRCA	TCGA-E2-A1LI	0	3121	white	57	0	1	11.994	9.11894	11.3191	7.37504	11.6528	12.1883	12.6246	11.224	11.9248	9.9901	13.1003	13.6545	11.2408	3.32193	11.9133	12.3953	12.4273	8.55459	12.4663	14.4737	13.8915	7.11894	7.55459	9.29921	13.4432	6.53916	15.3695	10.9233	12.8439	12.508	14.089	12.0231	13.8382
						TCGA-BRCA	TCGA-AR-A24Z	0	3001	white	57	0	1	12.7337	8.85175	10.6978	11.5003	11.5113	12.0825	13.0105	11.8384	11.0382	9.31288	13.0823	13.2877	14.3712	0.01	12.6334	12.6768	12.3493	8.02237	12.0865	12.6909	14.0475	8.37069	8.76818	10.2784	11.1793	7.8392	16.6146	11.679	12.5584	12.8564	13.254	12.7281	12.2387
						TCGA-BRCA	TCGA-GM-A2DC	0	2535	white	57	0	1	11.1749	7.88264	9.95274	8.99718	10.4939	11.6488	12.2186	9.75154	10.8226	9.24555	11.8478	11.1861	12.0095	0.01	11.3734	9.89785	12.4041	8.50383	10.5382	11.3089	12.7065	8.90989	7.35755	8.24317	11.5132	6.10852	14.6686	10.2597	11.0437	6.14975	12.9979	11.5957	12.3058
						TCGA-BRCA	TCGA-AO-A03R	0	2091	white	57	0	1	10.3652	7.76818	8.94251	11.0084	9.50184	11.5999	12.2682	11.1111	10.7682	7.57743	10.3095	11.6106	11.7611	3	11.2935	10.9993	12.3348	9.16239	11.3061	11.0286	13.0875	8.26209	7.02237	9.50581	11.1536	6.39232	14.5204	9.28771	12.284	10.4357	14.0114	10.9636	10.8065
						TCGA-BRCA	TCGA-A7-A0CE	0	1074	white	57	0	1	12.7298	8.35315	12.3824	7.3837	10.9915	11.9586	11.8325	10.9737	11.4299	11.4949	13.1677	13.3076	12.0928	2.58496	11.7744	12.3904	12.5345	9.31515	11.1548	12.3963	13.9563	8.61839	14.1312	9.79766	12.4961	10.6847	17.1403	10.9009	13.5511	12.2871	13.4491	12.204	12.6546
						TCGA-BRCA	TCGA-A7-A0CJ	0	931	white	57	0	1	11.5836	10.0728	10.9708	6.62936	10.9462	11.7134	13.4473	11.7694	11.4848	7.53138	12.4231	13.0225	14.9149	0.01	12.6131	12.4017	13.0788	7.48382	11.4003	11.3614	13.9819	6.44294	6.83289	10.4533	11.9399	6.56986	15.8493	11.5906	12.9751	12.3987	13.1155	12.1056	11.4341
						TCGA-BRCA	TCGA-E2-A1IJ	0	865	white	57	0	1	10.4828	8.02791	9.72962	7.88264	10.5793	11.1929	11.7842	9.64926	10.1383	9.46557	10.9344	11.1743	11.3918	0.01	9.84706	11.2831	10.5196	8.58496	9.91289	10.5746	12.2621	8.75489	9.02514	9.44501	10.6421	7.33985	15.6077	8.97154	11.2131	9.48382	11.5665	11.7035	10.4625
						TCGA-BRCA	TCGA-D8-A146	0	643	white	57	0	1	11.0775	8.79116	10.3487	9.45121	11.0293	11.7561	12.4653	10.9593	10.8122	9.17991	11.9604	12.4592	13.0524	2	10.2216	12.5946	10.7928	9.61839	10.5058	11.4215	12.7942	9.04166	9.79766	10.2204	11.0788	8.18982	15.9152	9.93811	12.4929	10.1573	13.0212	12.5033	10.676
						TCGA-BRCA	TCGA-D8-A1XM	0	538	white	57	0	1	11.9866	9.40514	11.6636	10.3061	11.7956	12.3723	13.3507	11.3443	10.9344	9.43463	12.8731	12.6257	12.5157	2.32193	10.5018	11.3332	12.2816	10.4284	10.9787	12.2384	13.6041	9.82337	9.66888	10.2408	11.242	8.33539	16.4868	10.7549	13.3364	12.0417	12.9381	11.8049	11.9607
						TCGA-BRCA	TCGA-E9-A22E	0	1269	white	56	0	2	10.9114	9.65464	10.0307	9.69523	11.0396	12.2456	12.2538	10.1215	11.8293	9.43045	11.346	12.4094	13.0711	1.58496	11.3929	11.952	12.2851	8.93958	11.0914	12.0967	12.7061	8.29462	10.5177	10.5177	11.7249	7.53138	16.1991	9.59246	11.8321	10.4189	13.8373	11.6931	11.2046
						TCGA-BRCA	TCGA-E9-A1RC	0	1224	white	56	0	2	12.0674	8.54689	11.2802	6.82018	10.9031	12.5292	13.4769	11.4078	11.2527	9.79279	12.8063	13.8032	13.8118	1.58496	12.4494	11.9396	11.294	7.93074	10.8933	11.6362	14.4631	7.56986	8.82018	8.7879	12.9478	6.6865	17.0451	11.5216	13.9828	11.3253	12.8874	10.6777	12.5868
						TCGA-BRCA	TCGA-D8-A3Z6	0	563	white	56	0	2	11.7952	9.27845	9.98584	9.99859	11.2485	12.1154	12.7076	9.83763	11.151	10.545	11.9337	11.815	12.978	2	10.6375	12.3295	11.3987	8.9629	10.6768	11.8126	12.8402	8.93074	9.16742	9.81698	11.0396	7.97154	16.5257	9.84862	12.0393	10.3815	12.9915	13.8287	11.5999
						TCGA-BRCA	TCGA-A7-A4SB	0	418	white	56	0	2	11.0458	7.06609	10.0993	8.14466	10.5488	10.9708	11.5098	10.6847	9.8857	7.56986	11.0593	11.2796	9.70044	0.01	9.79928	12.3298	10.6978	9.25974	9.93074	10.7339	12.6584	9.46761	8.10329	9.77314	9.91886	6.76818	14.0789	10.4284	11.255	9.82337	12.0095	10.3815	10.716
						TCGA-BRCA	TCGA-A2-A0EP	0	3603	white	56	0	1	11.4993	10.7607	11.8364	10.813	11.9647	12.4455	12.2703	11.2058	11.2149	8.82337	11.7661	11.8321	12.6071	6.64386	10.8642	12.849	10.5469	11.9359	10.4615	11.6142	12.1677	11.2609	9.11894	10.2773	11.7678	9.13955	15.9889	9.50184	11.8258	11.1183	12.6319	13.9713	11.4152
						TCGA-BRCA	TCGA-BH-A0BT	0	2365	white	56	0	1	11.4284	10.0688	9.07948	8.21432	11.4993	12.5071	13.6533	9.30606	11.8545	9.23122	12.2037	12.4551	12.1981	2.58496	11.9487	12.1583	12.617	7.93664	11.2076	11.4984	13.3306	7.93664	7.82655	8.42626	11.3197	6.12928	15.7653	9.97298	12.2216	10.0674	12.204	12.3256	11.2755
						TCGA-BRCA	TCGA-E2-A152	0	2128	white	56	0	1	11.0861	8.01123	9.41574	9.59059	10.7151	12.099	12.2943	10.0224	10.7065	11.4848	12.0967	12.2894	13.8086	2.58496	10.9936	11.9088	10.8439	8.70044	9.97298	11.2773	13.4905	8.07682	8.88264	9.81698	11.2969	6.50779	16.0402	10.6284	11.8388	11.1325	13.4202	11.8796	11.2082
						TCGA-BRCA	TCGA-D8-A1XO	0	1682	white	56	0	1	12.4709	8.93369	11.6344	10.9218	11.4236	11.668	13.6271	10.8392	11.163	9.52748	12.8317	13.0243	13.383	0.01	11.0341	12.0293	11.357	7.37504	10.8525	12.4328	12.8204	8.31288	9.90539	9.63662	11.2738	7.11894	15.7619	10.2796	13.1033	10.5333	13.2525	11.5372	11.4823
						TCGA-BRCA	TCGA-AO-A0JI	0	1528	white	56	0	1	10.9607	7.56986	11.6087	12.7936	10.021	11.8443	12.4486	11.7022	11.1013	7.82655	12.4383	12.8963	13.0091	2.58496	10.8001	11.9311	11.6595	7.65821	10.8009	11.1849	13.4984	8.92481	8.15987	11.1427	11.0795	8.39232	14.7195	10.5255	12.8684	10.8329	12.9874	13.2258	11.3794
						TCGA-BRCA	TCGA-A1-A0SE	0	1321	white	56	0	1	11.8009	9.18239	11.4502	12.0478	11.2969	11.8416	13.2792	10.7797	11.3259	9.20701	12.3851	12.688	11.9737	3.32193	10.6768	12.2842	11.8997	9.25267	11.0238	12.477	13.5052	9.47168	9.01402	11.1712	11.1693	8.36194	16.3141	10.5727	13.0723	10.6812	13.1599	12.3264	12.1421
						TCGA-BRCA	TCGA-BH-A0HQ	0	1121	white	56	0	1	11.2709	6.98868	9.97154	11.6366	10.8074	11.5713	12.67	9.6865	10.3174	9.75822	12.0345	11.8595	12.2076	1	9.89785	11.774	11.332	8.38802	9.99435	10.7887	12.7455	7.84549	8.40939	9.49185	10.4696	7.11894	15.7388	9.84549	11.994	9.54496	12.3597	10.9751	11.7004
						TCGA-BRCA	TCGA-A7-A0DB	0	1007	white	56	0	1	11.5159	8.29232	9.93295	8.94251	10.168	10.8738	12.3946	10.2461	10.388	8.81378	11.6022	12.4319	12.5632	2.16993	9.84941	11.6693	10.9207	9.72877	10.0908	10.5967	11.9782	9.09144	8.66	9.9629	10.6207	7.14466	15.6978	9.87344	12.2564	11.0848	12.3902	11.2544	11.0818
						TCGA-BRCA	TCGA-EW-A1OV	0	789	white	56	0	1	11.1724	8.88264	9.77643	6.40939	10.7482	11.9185	11.7142	10.42	10.6944	10.2738	11.6221	12.0512	12.7351	5.52356	10.2958	11.8811	11.7334	9.13186	10.2143	11.5319	12.8386	8.23362	7.54689	8.88874	11.4732	7.27612	14.7781	9.91588	12.2381	11.3482	12.6246	12.2073	11.2294
						TCGA-BRCA	TCGA-BH-A0AW	0	622	white	56	0	1	10.3945	8.59619	9.61287	11.6479	9.56033	12.5857	11.823	10.7822	11.1636	8.77808	11.0471	11.9762	12.2503	3.80735	10.6384	11.3231	16.4091	9.05799	10.1421	11.2192	12.9387	8.36632	8.49185	9.24793	10.8665	6.89482	15.1865	9.40939	12	12.0464	14.0161	12.5404	10.8826
						TCGA-BRCA	TCGA-D8-A1XR	0	482	white	56	0	1	11.9241	7.80735	11.0314	6.88264	11.2639	11.5108	13.1975	11.2336	11.1599	10.5546	12.6216	13.268	11.7703	2	11.4939	13.0761	11.6425	9.11114	11.7944	12.2521	13.0269	8.58871	9.82814	9.69523	11.5122	7.25739	16.2594	9.99152	13.7119	12.0461	13.0425	13.8825	12.2485
						TCGA-BRCA	TCGA-D8-A1JH	0	426	white	56	0	1	11.9582	9.26679	11.6271	9.00282	11.6294	12.3671	13.0636	11.3185	11.0908	8.20945	12.8453	12.6976	12.4628	3.45943	10.84	12.1453	10.9189	9.69697	10.9636	12.0255	13.7011	10.3309	10.5372	12.8172	11.9091	8.53138	16.6481	10.5187	12.7764	10.3253	13.7344	12.4722	11.4553
						TCGA-BRCA	TCGA-D8-A1XU	0	395	white	56	0	1	11.7108	9.70736	10.7928	12.7511	11.3625	12.4793	13.6925	10.2656	12.0658	9.67596	12.6815	13.2948	13.3886	3	11.9462	12.0481	11.4221	7.87036	11.2639	13.0154	13.0521	8.42206	9.53722	10.4263	11.3691	8.64746	16.2413	10.3498	12.512	11.0369	14.0028	11.7993	11.9344
						TCGA-BRCA	TCGA-EW-A1PE	0	320	white	56	0	1	11.363	9.18982	10.8872	9.49586	10.9476	11.1991	12.217	10.5897	10.7532	8.86728	12.2636	12.7471	13.3142	3	10.3826	11.2715	10.6839	9.20945	12.6937	11.6239	12.5906	9.01681	9.20212	9.63844	10.7863	7.84549	16.5343	9.8009	12.6046	11.5018	12.7247	15.0596	10.1033
						TCGA-BRCA	TCGA-BH-A0HL	0	72	white	56	0	1	12.097	6.97728	11.8353	7.70044	11.9989	12.0898	12.9776	10.8265	11.2354	11.4589	11.9348	11.2871	12.6457	1	11.664	12.6421	11.5911	7.91289	10.4083	11.5994	13.8366	11.4909	8.2384	10.2831	10.4727	6.42626	16.0066	11.4934	13.08	12.9726	12.7478	11.0735	11.8345
						TCGA-BRCA	TCGA-AN-A0G0	0	16	white	56	0	1	11.6987	7.9542	11.3939	4.32193	11.8368	12.7288	13.1222	10.8218	11.1235	9.54496	12.6062	13.2696	13.9547	1.58496	10.9794	12.9929	12.0495	7.93074	11.5868	11.8392	14.4037	7.45943	7.55459	10.8925	12.3343	6.22882	17.2079	11.6022	13.4537	13.2081	12.7543	11.3437	13.5276
						TCGA-BRCA	TCGA-AN-A0AM	0	5	white	56	0	1	11.4762	10.6618	11.9589	7.31288	11.1026	13.0097	13.7554	10.1935	11.6225	9.16993	12.5591	12.9151	12.1555	4.58496	11.2402	12.3487	12.8659	7.99435	11.3117	12.5656	13.7513	7.73471	7.42626	7.93074	10.6092	6.71425	16.9163	10.7903	12.5302	12.9778	13.6307	14.3923	12.3518
						TCGA-BRCA	TCGA-AC-A7VC	0	1	white	56	0	1	10.6384	11.3359	10.9151	6.18982	11.9315	12.3501	11.3853	8.63662	11.3912	5.85798	11.703	11.7715	9.85953	3	10.6952	11.8757	12.1049	10.3287	9.40088	11.0403	12.1839	9	10.6211	8.7879	10.1046	8.65821	16.4898	9.16993	11.6479	11.3482	12.9436	11.6411	11.7155
						TCGA-BRCA	TCGA-D8-A27W	0	373	white	55	0	2	12.1459	9.68825	11.9144	10.1098	11.8017	13.8869	13.5578	11.7859	11.2685	8.93369	12.8305	12.8295	14.6881	2	11.6202	12.3958	13.9001	9.00843	11.2871	12.2143	15.2484	9.02237	9.27845	10.8757	11.032	7.76818	17.0447	12.1373	13.3174	12.7893	13.7338	12.0046	12.2167
						TCGA-BRCA	TCGA-AN-A0XR	0	10	white	55	0	2	10.716	9.15228	10.0444	5.67243	10.1836	11.6389	12.6972	10.4305	11.3756	11.4993	11.9377	12.3636	13.026	1.58496	10.9636	13.0367	10.4888	6.91886	10.9723	11.3078	13.3894	6.74147	7.02237	8.33985	10.4676	5.78136	16.1262	10.3608	12.7669	12.2336	13.7457	12.8194	11.0286
						TCGA-BRCA	TCGA-AR-A24W	0	1550	white	55	0	1	12.1482	7.26679	10.9936	10.0553	10.236	11.2082	11.9509	10.3674	10.5294	9.40727	11.6484	12.6083	12.9775	2	11.4507	10.8281	10.5661	9.89785	11.8154	11.1911	12.8971	10.0042	9.81378	11.6578	11.3242	8.62571	15.0295	10.0993	12.2113	9.01123	12.887	9.61471	11.2831
						TCGA-BRCA	TCGA-EW-A1P0	0	1251	white	55	0	1	12.1655	6.89482	9.87805	8.79442	10.7846	11.8963	12.2003	10.332	10.2491	6.40939	12.4351	12.0674	13.1483	0.01	11.0661	11.749	11.4062	10.1662	12.0255	11.5713	13.4045	7.12928	6.40939	9.38586	10.9031	6.2854	15.8708	10.6466	12.349	10.2946	12.395	11.2149	11.9204
						TCGA-BRCA	TCGA-BH-A0HB	0	806	white	55	0	1	10.3026	8.89482	10.137	9.77149	10.5859	12.7222	12.8807	10.941	11.3393	7.90087	11.4984	12.5831	12.7775	2.80735	11.4414	11.6724	14.2784	8.03892	10.9614	11.9241	13.453	7.96578	6.98868	12.605	11.0112	6.10852	15.747	10.611	11.4115	11.6298	14.0947	12.1257	10.9929
						TCGA-BRCA	TCGA-D8-A1XK	0	441	white	55	0	1	12.2932	8.03892	11.764	6.04439	11.3837	11.821	13.2421	12.6117	11.9054	10.7805	13.586	14.0957	13.269	4.24793	12.9589	11.5328	12.0802	7.3837	11.2095	13.9731	15.1967	7.73471	7.70044	10.1649	12.8738	6.78136	16.8951	12.7826	14.1684	14.2374	14.2099	12.6094	13.4803
						TCGA-BRCA	TCGA-AN-A0FS	0	210	white	55	0	1	12.6497	8.89178	11.7292	11.969	11.5812	11.7879	13.1841	11.4959	11.2282	8.36194	12.5946	12.7509	13.6331	1	11.1904	12.2694	11.5362	11.0895	10.8857	11.7499	13.0107	10.5632	9.84078	11.8796	10.8361	9.01402	16.4614	10.3826	13.1167	10.332	13.7358	11.8918	12.0413
						TCGA-BRCA	TCGA-AN-A0FY	0	10	white	55	0	1	12.4699	8.87958	12.043	9.20212	11.5392	12.431	12.9283	11.8154	11.6022	8.34873	12.7375	12.7781	12.4299	2.80735	11.5187	12.1033	11.3253	9.80413	10.9381	12.344	13.9879	8.37938	8.36194	9.85019	12.014	7.45943	15.8064	11.9708	14.1867	11.7202	14.307	11.1662	12.4936
						TCGA-BRCA	TCGA-AN-A0AR	0	10	white	55	0	1	10.9794	9.50581	11.2491	4.58496	11.6344	12.7781	13.1339	10.821	13.0721	11.4189	12.0802	12.776	12.1082	2.80735	11.7707	12.7243	11.7871	9.52356	10.69	14.0905	14.0803	7.12928	6.16993	9.86109	11.9618	5.61471	15.0965	10.7056	12.056	12.3742	13.8252	11.6316	12.2753
						TCGA-BRCA	TCGA-BH-A0DV	0	2064	white	54	0	2	11.8842	9.85798	11.9719	10.3576	11.4863	11.983	12.7362	10.5999	11.0593	10.043	12.1124	12.4302	13.2324	0.01	10.599	11.8146	11.0668	11.7258	10.697	11.3548	12.5694	11.4009	10.5469	11.5348	10.4676	9.29921	16.0568	9.86109	12.463	9.58308	12.6175	12.3185	10.8727
						TCGA-BRCA	TCGA-E2-A107	0	1047	white	54	0	2	12.0526	7.59246	9.95128	10.2396	9.99577	12.3636	13.0184	10.9794	11.4707	11.5132	10.8719	12.7151	12.0102	1	11.1124	12.7524	12.0039	8.96	10.7903	11.9636	13.1191	8.64024	7.48382	9.27845	11.6078	7.46761	15.6221	10.4157	13.1456	12.0941	13.2464	11.4993	11.5646
						TCGA-BRCA	TCGA-D8-A3Z5	0	1015	white	54	0	2	11.6389	7.65821	10.9076	11.9381	11.5474	12.1836	12.4359	9.72792	11.3021	10.0403	11.917	11.3454	12.0678	2	9.30378	13.3998	10.5048	10.6961	10.4126	11.463	12.2372	10.3859	8.94837	10.749	11.3515	7.52356	15.394	9.61471	11.6165	8.44708	12.2903	12.0549	12.2618
						TCGA-BRCA	TCGA-AN-A0XT	0	10	white	54	0	2	11.3939	7.29462	10.5187	12.5201	10.9388	11.3848	12.3177	9.89178	10.8431	7.55459	11.5812	12.1225	14.1334	1	10.403	12.1724	9.31741	9.0607	11.6537	11.1768	12.0454	10.0835	9.80574	10.9844	9.98014	8.15482	15.2786	8.82018	11.3049	9.28771	13.5026	10.821	11.2438
						TCGA-BRCA	TCGA-AR-A0U4	0	3261	white	54	0	1	11.3214	9.35315	11.7503	7.56986	11.8361	11.5167	13.1075	12.0678	11.0987	6.32193	12.8708	13.3261	13.4497	1.58496	11.8094	11.8357	12.6495	9.31741	10.0701	12.2512	13.7978	7.82655	7.90689	8.42626	11.9654	5.70044	16.5478	11.4393	12.3864	11.6618	12.4522	13.6418	12.4871
						TCGA-BRCA	TCGA-AR-A24N	0	3035	white	54	0	1	13.0112	9.4818	11.4964	6.02237	11.0835	12.3813	13.9812	11.3066	11.1209	10.8057	12.9022	13.4573	9.55842	1	11.7448	11.431	11.4843	8.13443	12.5353	11.8416	14.3122	7.85798	9.62205	9.85019	11.332	7.31288	15.6886	11.2963	13.7331	12.0307	13.2445	12.4276	12.2107
						TCGA-BRCA	TCGA-A2-A0EO	0	2442	white	54	0	1	11.9701	8.55075	10.7665	8.43045	10.8265	11.5483	12.5474	10.9403	11.0423	8.94837	12.1118	12.1089	11.7043	1.58496	10.8242	11.6344	11.6216	9.44087	10.6662	11.5994	13.0694	8.93664	9.26444	14.6888	11.8416	8.03892	15.6722	10.6119	12.5606	9.48985	13.0315	11.567	11.66
						TCGA-BRCA	TCGA-BH-A0BO	0	2197	white	54	0	1	12.25	8.46761	11.6707	10.6046	11.5177	11.2574	12.2015	10.1997	10.6421	9.19722	12.3701	12.2917	12.7175	1	11.0203	11.9833	10.8971	11.3117	10.4858	11.2755	13.1691	10.9046	10.1561	10.2773	10.2467	8.91289	15.9908	10.3912	12.1494	9.09276	12.649	13.1015	11.9256
						TCGA-BRCA	TCGA-AO-A0JJ	0	1887	white	54	0	1	11.2703	8.54303	11.3298	10.0362	10.9344	11.683	12.5375	11.8603	10.8178	9.38802	11.8325	12.4512	12.8474	3.80735	11.2644	11.3315	11.236	10.0901	11.4278	11.8277	12.9515	9.92481	9.26209	10.8162	10.9965	8.90989	15.8141	10.4979	12.8523	10.8533	12.9309	12.4497	10.4512
						TCGA-BRCA	TCGA-BH-A0BM	0	1876	white	54	0	1	10.9106	7.44294	8.85487	9.19967	9.36632	11.592	11.7826	9.49185	10.5488	9.46964	10.6393	11.2101	12.556	0.01	10.0307	10.5507	10.7056	10.0028	10.0901	10.7313	12.272	8.93074	8.60363	10.1586	10.2264	6.56986	14.7508	8.85798	11.0721	7.21917	12.5653	11.1144	10.2644
						TCGA-BRCA	TCGA-D8-A1JB	0	1688	white	54	0	1	11.1818	8.33539	10.1085	11.0112	10.568	12.0348	12.2706	11.1183	10.7895	8.61839	11.7969	11.9661	11.994	3.58496	11.0566	11.5152	11.3509	7.69349	10.5661	11.7989	12.2926	8.83605	7.84549	11.2027	11.2438	8.18488	15.038	9.83131	11.9061	9.32418	12.5601	11.0147	10.7194
						TCGA-BRCA	TCGA-A1-A0SF	0	1463	white	54	0	1	10.7194	7.81378	10.3859	11.2161	10.2784	12.0413	12.6913	10.7364	10.8384	9.43045	11.6059	12.2134	13.4446	5.12928	10.4727	12.3086	11.3559	9.19476	10.5632	11.8599	13.2685	9.69174	8.50383	9.82337	11.1453	8.33539	14.9073	10.2456	11.9403	10.3432	12.6046	11.1351	11.2198
						TCGA-BRCA	TCGA-E2-A10C	0	1220	white	54	0	1	9.84549	8.76487	8.97441	11.6184	10.0715	12.2125	12.791	9.59805	11.6502	10.4105	10.567	11.5008	13.2248	2.58496	11.4378	12.7102	12.8931	7.88264	10.9866	11.8033	13.6093	7.05528	7.25739	7.71425	11.8182	4.85798	15.6548	10.374	11.6542	11.2831	13.6439	12.2249	11.1033
						TCGA-BRCA	TCGA-AR-A5QP	0	1185	white	54	0	1	11.5053	8.49985	10.6321	10.5008	11.1843	12.6828	12.8386	10.2456	11.2825	8.07146	11.9399	12.233	11.6475	2.32193	10.4419	12.4556	11.5939	9.38154	10.5981	11.4868	12.8453	9.56224	7.82655	10.3095	11.3371	7.70044	15.5953	9.93074	12.4574	9.60363	13.129	11.2503	11.6225
						TCGA-BRCA	TCGA-BH-A0HX	0	829	white	54	0	1	11.88	8.33539	10.8455	8.87958	10.952	12.5324	12.3794	11.431	10.8704	8.98299	11.568	12.3622	13.8324	2.58496	10.9159	12.1373	12.8578	9.0607	11.5137	11.6461	13.7905	11.4263	9.24555	10.749	10.8384	6.10852	15.7087	11.4346	11.9589	11.1466	13.318	12.0049	11.3526
						TCGA-BRCA	TCGA-BH-A8G0	0	662	white	54	0	1	11.279	8.33092	11.1215	9.20457	10.8025	11.3371	11.6488	10.3264	10.5314	8.86109	11.3242	11.1624	11.5732	2.58496	9.89785	11.6115	10.1923	10.1072	10.0701	10.7134	11.8234	10.341	8.89178	10.0014	11.0021	8.33985	15.4871	8.94544	11.3729	7.94251	12.1144	12.1312	11.0458
						TCGA-BRCA	TCGA-D8-A1JJ	0	611	white	54	0	1	11.1053	8.80413	10.4157	7.64386	11.0512	12.7532	13.6459	10.6707	11.3971	10.2738	12.9387	13.5551	13.4112	2.58496	11.9084	12.5132	12.4083	8.43463	10.8742	12.5245	13.3769	7.7879	8.57743	10.1636	11.8122	6.04439	17.0846	10.2656	13.3069	12.3029	13.2403	11.8122	11.8392
						TCGA-BRCA	TCGA-D8-A1JI	0	577	white	54	0	1	12.5258	9.05799	10.6689	8.53528	10.544	11.3061	12.2079	10.783	10.6742	8.92481	12.0654	12.1724	9.94105	1	12.1602	11.2348	11.4173	8.29921	9.86419	11.8045	12.8545	8.56986	7.81378	8.79442	10.0307	7.39232	14.9513	10.6689	12.5179	10.3117	11.8834	10.8719	11.014
						TCGA-BRCA	TCGA-LD-A7W6	0	404	white	54	0	1	11.9996	8.97154	11.5008	10.2981	11.3625	11.2264	12.3211	10.6926	11.0492	9.02791	12.0891	11.8615	12.1737	1.58496	10.6366	11.7368	10.8463	9.57932	11.0049	11.5338	12.6909	9.62753	8.26679	9.82655	11.021	8.11374	14.8138	10.1215	12.2782	10.9844	12.7705	12.8847	11.0464
						TCGA-BRCA	TCGA-E9-A244	0	21	white	54	0	1	12.3171	7.87652	11.4656	6.44294	11.3106	12.5196	13.2668	11.368	11.7202	8.48784	13.8484	13.4288	12.6136	1	11.9502	13.902	13.0593	9.633	11.6808	13.8041	14.8358	7.6865	8.56605	10.1319	12.0014	5.90689	15.7257	12.056	12.7469	10.6768	13.6356	10.3061	13.4508
						TCGA-BRCA	TCGA-AN-A0XU	0	10	white	54	0	1	12.0502	8.97441	11.0848	6.88264	11.6808	12.6204	13.4837	11.381	11.865	9.02237	13.397	13.1682	12.9533	4.08746	12.3129	11.8903	11.4351	7.09803	10.9787	12.7123	14.0934	7	12.674	8.7039	13.1966	8.19967	17.874	11.8254	13.0858	13.2883	12.4696	12.5194	12.4858
						TCGA-BRCA	TCGA-A2-A0YH	0	659	white	53	0	2	10.9396	9.22641	10.0389	10.9293	11.5541	11.2167	12.7983	11.032	10.6266	7.66534	12.3937	12.5943	12.9839	3.45943	11.7809	12.5577	11.3055	7.39232	12.1351	11.3157	13.1788	8.69	9.15482	12.1592	12.2333	7.75489	15.679	11.0244	12.8078	10.8865	12.5732	12.5748	11.8114
						TCGA-BRCA	TCGA-EW-A1IZ	0	554	white	53	0	2	11.5445	9.39874	9.86573	9.69174	10.5517	12.2935	12.2411	11.224	11.7215	10.1459	11.4823	12.1421	12.8817	4.32193	10.4221	13.1254	11.5464	8.31288	11.0647	11.8029	13.083	8.76487	6.39232	9.20212	11.3454	7.2854	15.0611	10.314	11.9897	11.0546	13.6678	13.132	10.7993
						TCGA-BRCA	TCGA-D8-A27T	0	398	white	53	0	2	11.5474	9.50184	11.245	9.56033	11.275	11.4914	12.5505	10.5167	10.9901	8.15987	12.1163	12.5672	12.3671	4.16993	11.2088	12.1699	10.988	9.39874	10.9578	11.5817	12.9166	9.97871	9.37721	9.98299	11.0042	7.88874	15.9941	10.0835	12.8866	11.128	13.1373	12.6898	11.5817
						TCGA-BRCA	TCGA-BH-AB28	0	287	white	53	0	2	10.0861	8.72451	12.0627	8.56986	11.5392	11.8838	13.1439	10.3026	10.6733	6.65821	12.2603	12.022	11.7764	3.80735	10.2264	11.8765	11.1787	9.32867	9.94983	11.1662	12.879	8.76818	8.03892	9.25503	10.9972	6.9542	14.9191	9.77314	12.5969	10.8329	11.73	11.9065	12.4307
						TCGA-BRCA	TCGA-GM-A2DD	0	2282	white	53	0	1	11.4988	9.17493	9.85487	7.52356	10.6909	12.3617	12.2653	10.0251	11.3955	10.3902	11.2155	12.6954	11.5167	5.32193	10.2204	11.6931	11.6948	9.16239	10.9144	11.3729	12.7828	9.01123	8.02791	8.76487	12.2363	7.48382	16.1945	9.25974	10.5555	11.8807	13.4543	12.757	11.0532
						TCGA-BRCA	TCGA-D8-A1XW	0	1309	white	53	0	1	13.0926	8.55459	10.6671	5.2854	12.1849	11.3869	12.536	11.8265	11.0224	8.89178	12.7279	12.1396	11.7624	3.70044	11.0967	11.5023	10.733	11.2473	11.444	12.0573	12.8792	7.70736	9.7879	10.927	11.5358	8.22882	15.9778	10.683	11.6046	10.8948	13.0517	12.5479	11.9593
						TCGA-BRCA	TCGA-BH-A0B3	0	1203	white	53	0	1	11.3134	9.33316	12.2339	5.64386	11.4035	11.9833	12.7518	10.2574	11.4445	9.81378	12.327	13.9747	12.178	3.32193	11.7288	12.6911	11.815	7.98299	10.4939	13.3236	13.1404	7.69349	7.45121	9.12412	12.7002	6.58496	16.7695	10.2058	13.2056	13.2199	13.5518	13.3836	12.0865
						TCGA-BRCA	TCGA-E2-A1BD	0	1133	white	53	0	1	11.8174	9.34207	10.4522	10.7313	11.5957	12.7028	13.5991	10.7022	12.1963	10.6275	12.3556	12.732	12.7069	2.58496	11.2738	12.9093	12.2553	9.20457	11.4362	12.5661	13.5345	8.91588	9.74147	10.817	11.7956	7.54689	15.9683	10.3038	12.7826	9.90388	14.2779	12.1033	12.7603
						TCGA-BRCA	TCGA-A2-A04Y	0	1099	white	53	0	1	11.1787	9.04166	10.8297	12.4003	11.395	13.8051	13.5203	10.6202	11.7768	9.81858	11.9922	12.8196	12.6562	1.58496	10.5603	12.3742	12.7136	9.75822	11.7645	12.4223	13.8818	9.54496	8.21432	9.94398	11.7061	7.33092	16.0784	10.7423	12.4291	12.2889	13.9422	12.3734	11.4315
						TCGA-BRCA	TCGA-BH-A18I	0	1093	white	53	0	1	12.3977	9.57365	11.2744	9.09803	11.4351	12.0553	12.9634	11.528	11.2461	8.98299	12.7035	12.7256	12.7074	3.70044	11.1712	12.7425	11.3337	8.9571	11.3337	12.0778	13.7144	9.00843	9.96578	10.8986	12.1932	7.82655	15.8856	11.0175	13.1402	11.056	12.989	12.8777	11.8815
						TCGA-BRCA	TCGA-EW-A1PG	0	1051	white	53	0	1	10.9285	7.50779	10.9993	9.37504	10.8376	11.3365	12.2577	9.47573	10.3815	7.91289	12.0018	11.9862	11.3875	2.32193	11.188	10.7313	11.5646	8.70044	9.67419	10.7822	13.2565	8.02237	9.35755	10.6239	10.7781	7.61471	15.6289	10.0954	11.3004	7.60733	13.0317	10.4737	11.6371
						TCGA-BRCA	TCGA-E2-A14V	0	1042	white	53	0	1	10.6411	9.70908	9.82972	9.03067	10.9556	12.2152	13.1883	11.3658	11.2174	10.1586	12.4914	13.3699	13.3163	4.70044	11.9281	13.1704	12.7224	7.36632	11.3157	12.2521	13.8271	7.25739	7.96	11.0035	11.6957	6.37504	16.4252	11.3918	13.7003	12.4502	13.9652	11.5177	11.6115
						TCGA-BRCA	TCGA-D8-A73X	0	767	white	53	0	1	11.9263	8.50383	10.2143	7.84549	11.0921	11.5362	12.9696	10.4828	11.1737	9.25267	11.8517	12.0931	11.8978	1	10.6812	11.9589	10.9549	7.76818	10.9823	11.6519	12.8821	7.87652	8.3443	10.5285	11.2366	7.32193	15.8265	9.87191	12.2926	9.55842	12.8148	11.8914	11.9001
						TCGA-BRCA	TCGA-AR-A1AM	0	2991	white	52	0	2	11.9352	8.55075	10.8114	11.6891	11.1383	11.9798	12.2677	10.3264	11.0855	9.68825	12.1408	12.1743	11.8638	0.01	10.4767	12.3476	11.0314	9.07948	10.4818	11.7121	12.5558	9.70044	8.20457	10.5469	11.2324	8.67596	15.6336	9.32193	11.9901	8.46352	12.8734	12.5216	11.3151
						TCGA-BRCA	TCGA-AR-A24V	0	3203	white	52	0	1	11.6384	8.45121	11.128	10.6156	11.2009	11.5751	13.5258	11.1344	10.7262	6.65821	12.0755	12.8516	13.0355	1	11.4236	11.4372	12.0203	8.61102	11.4823	12.2606	13.2741	7.7879	10.196	10.7515	11.6821	7.61471	16.3194	10.6101	12.937	10.7515	13.0315	13.3989	10.8872
						TCGA-BRCA	TCGA-AR-A24X	0	3004	white	52	0	1	12.0199	8.31741	9.88111	7.24793	10.3498	10.7748	12.5962	10.7665	10.4848	7.30378	12.3115	12.2456	12.5058	0.01	11.1504	10.5245	11.1768	8.224	10.3554	10.9454	13.2753	7.97154	9.62205	10.2808	10.8313	7.07682	14.7446	10.7177	12.4602	10.1111	12.425	10.3117	11.7061
						TCGA-BRCA	TCGA-GM-A2DI	0	2590	white	52	0	1	10.3998	8.16993	9.70908	9.9542	9.94691	10.4584	11.4142	9.93369	9.63844	8.18982	10.8017	10.9084	12.2116	5.35755	9.20945	10.4635	9.39017	8.47978	9.54882	10.2456	11.1267	8.51175	7.65821	9.40727	10.5078	7.26679	14.5931	8.65105	10.4868	9.72451	11.5157	12.103	9.70563
						TCGA-BRCA	TCGA-E2-A14T	0	2311	white	52	0	1	11.7017	9.2503	11.8838	9.96	11.8933	13.7171	13.0079	11.6578	11.7645	11.1687	12.643	12.8116	14.6903	0.01	11.8384	13.5942	12.7775	9.17243	11.5727	11.9392	14.041	9.31061	8.07682	10.5421	11.6106	6.84549	16.3892	11.1978	13.0084	13.1301	13.4915	11.6344	11.6733
						TCGA-BRCA	TCGA-A2-A0ES	0	2190	white	52	0	1	11.9866	7.97154	10.8273	11.1517	10.6847	11.368	12.3824	10.5565	11.0327	9.73132	11.9374	12.1212	11.8634	3.16993	10.4939	11.6096	10.4868	10.4242	10.5038	11.5779	12.84	10.4491	8.82337	11.3292	10.9929	8.66178	15.7094	9.97441	11.8118	10.3242	13.0476	10.5765	11.1948
						TCGA-BRCA	TCGA-D8-A13Y	0	1728	white	52	0	1	12.5401	7.70736	12.2641	7.73471	11.0217	11.0126	12.9706	11.5901	11.5088	12.2255	13.5378	14.0617	12.3281	2.80735	12.0189	11.9414	12.1421	7.76818	10.7781	12.4131	12.8704	7.91886	7.94251	11.5068	12.7041	6.91886	16.1578	10.8186	13.4557	14.7767	13.5132	9.01681	12.3853
						TCGA-BRCA	TCGA-A2-A0CX	0	1728	white	52	0	1	11.0175	9.21189	10.4367	11.2021	10.9322	12.5587	12.437	10.2348	11.5641	10.102	12.3412	12.9959	13.7784	4.58496	10.5575	12.3931	12.4876	8.18488	10.3977	11.2738	13.7444	6.96578	8.90689	12.2779	11.8773	6.87036	15.7746	10.7151	12.64	12.6369	13.3599	12.3312	11.9744
						TCGA-BRCA	TCGA-EW-A2FW	0	672	white	52	0	1	11.4289	7.43463	9.86419	6.26679	10.2192	12.7292	12.4406	11.3875	10.875	9.00562	12.0331	12.6362	12.1157	1	10.9701	12.099	12.0792	9.29462	10.6804	12.0355	13.803	9.04439	8.76818	9.18239	11.1824	6.75489	16.0507	10.7279	13.4602	11.275	13.8181	12.7922	10.6961
						TCGA-BRCA	TCGA-A1-A0SI	0	635	white	52	0	1	11.8922	9.00282	11.4398	8.05528	11.4025	11.8937	13.0327	10.4757	11.1618	11.0841	12.7983	13.817	12.958	2	11.0802	12.4607	11.2562	8.69	11.128	11.8846	12.711	8.12412	9.24079	10.0914	12.2396	7.7879	16.2633	10.0084	13.5897	11.941	13.174	13.9105	11.6448
						TCGA-BRCA	TCGA-E9-A243	0	612	white	52	0	1	12.5836	10.2467	11.9215	6.40939	11.0007	11.9028	13.2777	12.8517	11.623	6.85798	13.265	13.8844	13.7597	5.35755	12.8144	12.29	11.9024	7.50779	11.8482	12.6771	14.6245	8.46352	10.764	10.7117	13.8846	10.5216	16.5039	12.2399	14.6167	12.3515	14.3103	13.5603	13.7652
						TCGA-BRCA	TCGA-EW-A1PH	0	607	white	52	0	1	11.3869	9.56415	11.0587	6.98868	11.6036	12.0698	12.3597	11.1389	11.7271	7.74147	13.4738	13.5293	11.4502	3	11.0091	12.5622	12.3166	7.11894	11.412	13.0358	14.1276	7.11894	10.3387	8.09803	13.4005	7.31288	15.773	11.5651	12.654	11.6506	13.913	11.9715	12.3861
						TCGA-BRCA	TCGA-BH-A0E1	0	477	white	52	0	1	11.628	8.43463	11.4903	7.35755	10.7279	11.6448	12.7836	10.9816	10.4707	9.20945	11.9954	12.7247	11.4645	2.32193	11.2515	11.9118	11.605	9.16742	10.7515	11.6041	13.3493	8.9629	9.78627	9.3966	10.4009	8.56224	15.8707	10.2831	13.2567	12.8339	12.9546	12.0921	11.7649
						TCGA-BRCA	TCGA-BH-A0HU	0	392	white	52	0	1	12.2417	8.67596	11.1548	7.13955	9.99435	12.477	12.84	11.0708	11.3875	9.43045	11.7052	13.3918	11.8925	1	11.2574	12.6711	13.076	8.3837	11.5137	12.6584	14.3681	8.39232	7.67243	11.8572	11.8677	6.55459	15.6197	11.2204	13.7291	11.0987	14.3498	11.567	12.6713
						TCGA-BRCA	TCGA-AN-A0FX	0	10	white	52	0	1	11.7719	8.80735	11.9248	10.5353	11.9979	12.6441	12.6528	10.6609	10.9498	10.5216	12.6832	13.6422	12.1261	3.70044	11.4419	12.061	12.0224	9.43254	11.1013	11.9855	12.9605	9.04439	8.55075	11.3253	13.049	8.30378	16.378	10.5718	12.9056	11.6312	12.5826	11.0607	13.1475
						TCGA-BRCA	TCGA-AR-A251	0	3030	white	51	0	2	12.8285	10.0593	12.145	8.93958	11.73	11.5187	13.8742	12.3883	12.3636	9.00282	14.356	14.9907	13.9229	4.9542	11.5157	13.5615	12.7076	9.90388	12.4724	13.9786	14.5955	9.53138	9.67948	10.4409	13.4976	9.41363	16.2648	13.1163	12.6965	12.7799	14.1367	11.4429	13.6445
						TCGA-BRCA	TCGA-BH-A0BA	0	1132	white	51	0	2	13.3078	8.29921	10.3912	11.144	10.1923	11.4019	12.4142	10.5934	10.5575	9.94105	11.8541	12.4684	12.7787	3.80735	10.2935	12.4858	10.021	10.6175	10.585	11.0196	12.5218	10.2877	9.32418	11.0828	11.9968	8.42626	14.3949	9.82655	12.3473	11.1849	13.4582	10.8887	10.7474
						TCGA-BRCA	TCGA-E9-A1R2	0	1063	white	51	0	2	10.8895	8.66178	11.3691	12.152	10.4848	11.69	12.3202	10.3343	10.9344	10.8376	12.8376	11.6724	11.5651	1.58496	10.7022	11.8603	12.3457	8.83605	10.3117	11.9841	13.4303	8.33985	7.94251	9.86882	10.8146	7.3837	15.1882	10.676	11.2119	10.5147	13.1798	11.527	10.8321
						TCGA-BRCA	TCGA-EW-A424	0	715	white	51	0	2	12.1357	8.74819	10.933	8.74819	12.0647	12.5814	13.5503	10.6865	11.9975	10.4409	12.2043	12.4305	12.1839	0.01	11.4868	12.9465	12.5377	8.33985	10.8742	12.3966	13.4761	8.81698	8.11894	9.68124	11.2021	8.03892	15.4711	10.7022	12.5703	10.5971	13.73	12.3647	11.6573
						TCGA-BRCA	TCGA-B6-A0IA	0	8391	white	51	0	1	11.7834	7.67243	9.81538	5.75489	9.96867	12.9342	12.5871	10.8114	11.6861	10.809	11.1886	12.7969	10.6591	2.32193	12.2894	12.0095	13.037	5.80735	11.3848	12.2837	12.3548	5.80735	7.27612	6.02237	10.2691	3.45943	15.6944	9.06609	12.9014	11.875	13.9116	11.6618	11.9166
						TCGA-BRCA	TCGA-AR-A1AH	0	3807	white	51	0	1	12.5791	8.61839	10.8337	5.83289	12.4969	12.9298	12.7997	10.4605	12.2653	11.9651	13.3974	13.0152	13.1241	2	11.9388	12.5467	12.0362	8.53138	11.3044	13.3195	13.9806	8.29462	9.74147	10.3387	13.6941	7.20945	15.2157	10.7764	13.9511	13.7142	13.218	8.93664	12.2417
						TCGA-BRCA	TCGA-AO-A1KR	0	2513	white	51	0	1	8.54303	9.92035	8.8392	5.52356	10.9136	13.1165	11.1743	8.68299	11.944	11.3842	11.3918	13.0741	12.3041	1	11.7043	12.4318	12.7863	7.56224	9.74651	12.4556	13.2822	7.45943	6.75489	7.55459	11.1427	6.58496	14.7914	9.03067	11.3348	11.2378	13.8631	11.42	13.0199
						TCGA-BRCA	TCGA-B6-A40C	0	2164	white	51	0	1	11.8895	9.54303	11.4707	8.48784	12.0423	12.5093	12.763	11.098	11.5013	10.8009	12.4714	12.1589	12.4911	2.32193	11.3783	13.3538	11.9377	10.3674	10.9293	11.9851	13.2394	10.2456	8.56605	9.56033	11.7928	7.44294	15.2938	10.6978	12.8504	11.5048	13.1493	13.725	13.0399
						TCGA-BRCA	TCGA-AO-A12E	0	2142	white	51	0	1	12.4181	8.03892	10.941	12.4971	10.9039	11.7351	13.0934	11.1935	11.3531	9.34651	12.4914	13.0291	13.3775	2	11.2125	12.577	11.7398	11.5098	11.6738	12.2515	13.5736	10.0362	8.66178	11.5637	11.2444	8.2384	15.904	11.1611	12.8851	12.0032	13.2873	13.3315	10.6573
						TCGA-BRCA	TCGA-BH-A0EI	0	1926	white	51	0	1	11.5575	8.35315	11.2935	7.90689	11.1183	11.5627	12.7056	10.7457	10.7237	9.7879	11.7711	12.2819	11.8041	2	11.4325	11.7351	10.4502	7.97728	9.97585	11.7461	12.8759	11.0701	9.5812	10.275	10.6484	7.50779	15.8298	10.3783	12.8779	10.611	12.6546	11.3174	11.007
						TCGA-BRCA	TCGA-E2-A15J	0	1640	white	51	0	1	12.1799	9.26444	11.3214	7.49185	11.1592	11.8944	13.6509	10.5167	10.623	9.67066	12.6156	12.7459	11.8384	0.01	11.021	12.0858	11.8174	6.88264	11.3696	11.9148	13.8169	7.14975	7.8009	8.22882	11.2438	6.55459	15.0341	10.8265	12.6797	10.8719	13.0755	12.7883	12.9631
						TCGA-BRCA	TCGA-E2-A1II	0	1025	white	51	0	1	10.6609	9.87958	10.6812	3	11.7121	11.8963	12.4017	10.6484	11.0875	2.58496	12.8622	13.0198	11.9484	3.16993	11.5906	12.9842	10.8556	6.87036	10.7624	11.2761	12.9894	7.20945	6.59991	7.47573	12.151	5.58496	14.8487	10.4073	12.4404	11.1408	12.1331	12.8925	11.3945
						TCGA-BRCA	TCGA-E2-A153	0	707	white	51	0	1	10.3912	8.75154	10.3707	6.12928	10.6653	11.1712	12.0858	9.55075	10.6582	7.82018	11.1202	11.5073	11.9207	2	10.6582	11.2222	10.9672	9.10591	10.1228	10.7855	12.5382	8.74483	9.0954	9.24793	10.6961	6.59991	15.9809	9.36851	11.4605	9.32867	12.021	11.7661	10.6707
						TCGA-BRCA	TCGA-D8-A13Z	0	635	white	51	0	1	11.8834	9.78953	10.6036	6.59991	10.9174	11.6636	12.6843	10.9823	11.6978	11.3603	13.2945	13.8465	15.166	5.85798	11.9031	12.4378	11.7249	9.54689	11.286	12.9593	13.8237	8.46761	8.76155	10.0307	12.3329	7.8392	16.7926	10.774	13.3962	14.32	13.492	12.6461	12.0116
						TCGA-BRCA	TCGA-A2-A0T7	0	631	white	51	0	1	11.543	8.34873	11.4163	10.3354	10.8368	12.3103	12.8895	10.8502	10.9196	11.3718	12.1115	13.1159	11.1466	1.58496	10.888	11.6689	11.5906	8.55459	10.6312	11.9088	12.8156	8.87344	8.98299	10.9751	13.076	8.19476	15.6126	10.2467	13.2239	10.5727	12.8198	11.937	12.0238
						TCGA-BRCA	TCGA-D8-A1JU	0	447	white	51	0	1	12.2963	9.20701	11.4818	10.9263	11.1668	11.4732	12.5028	10.6952	10.7985	8.07682	12.2966	12.3636	13.0856	3.80735	10.4584	11.4179	10.8549	11.0661	10.6402	11.6216	12.7326	10.9189	9.8009	11.4873	10.733	9.3837	16.3673	9.92035	12.2978	8.15987	12.7928	11.9458	11.5608
						TCGA-BRCA	TCGA-D8-A143	0	431	white	51	0	1	11.8846	10.375	11.4346	6.47573	10.5746	12.837	12.8634	11.0566	11.6184	10.2969	12.7471	14.4344	14.0457	8.10329	12.5889	11.2294	12.2641	8.3443	9.66534	12.2464	14.096	7.54689	7.36632	8.18982	12.2787	7.62936	16.0327	10.6101	13.5939	14.7791	13.6419	10.543	12.3146
						TCGA-BRCA	TCGA-E9-A1NI	0	300	white	51	0	1	10.8258	8.87344	9.58871	7.30378	9.85487	12.2131	12.0014	10.224	10.8796	8.69349	11.5083	11.8619	12.6076	2	10.9352	11.2609	11.7292	7.85798	10.1046	11.2438	12.9054	7.69349	8.40514	8.37938	10.6018	6.18982	16.0289	9.633	12.1696	11.411	12.4186	11.9816	10.5028
						TCGA-BRCA	TCGA-E9-A248	0	59	white	51	0	1	12.4155	9.46557	10.1228	8	11.0362	11.2917	12.9095	11.5665	10.6627	9.20945	12.3396	13.3299	13.2624	9.85643	11.6909	12.1954	11.1389	7.40088	11.1867	11.8607	13.6033	7.48382	7.20945	9.51175	12.7421	7.10852	15.8263	10.7177	13.4991	12.6271	13.1978	11.1319	12.6486
						TCGA-BRCA	TCGA-AN-A04C	0	54	white	51	0	1	10.8734	8.75154	8.65821	7.10852	10.6156	12.6662	13.133	10.6751	11.6138	10.941	12.2018	12.7719	12.4102	3.80735	10.4252	12.3867	14.4314	9.0954	10.6917	12.3049	14.34	7.87652	8.01123	9.30606	12.9385	7.77479	15.6023	10.3674	12.3001	12.3912	14.8012	11.0901	12.1618
						TCGA-BRCA	TCGA-AR-A0TW	0	3009	white	50	0	2	12.0105	8.12928	9.83763	4.52356	10.446	13.3151	14.1898	11.783	10.5661	9.97728	13.3454	12.3117	13.3617	3.16993	11.411	12.1573	13.5999	7.45943	10.5507	12.1206	14.3542	7.74147	6.72792	8.94837	10.6375	6.12928	16.0896	11.9274	12.7056	12.1677	12.7834	12.527	10.8098
						TCGA-BRCA	TCGA-AR-A254	0	2605	white	50	0	2	11.7703	9.31061	11.5976	12.4281	11.964	12	13.4463	10.875	11.2912	10.9469	13.3079	13.4445	13.4484	3.16993	11.4035	12.5204	13.236	8.78136	10.7789	12.9403	14.3593	9.07146	8.58496	10.544	12.3592	7.66534	16.6348	11.4522	13.1569	12.2822	13.8049	11.7908	13.0911
						TCGA-BRCA	TCGA-E2-A1B0	0	1631	white	50	0	2	12.9905	9.23122	11.4605	7.85175	12.6768	13.5457	13.675	11.3219	11.4676	11.8734	14.4308	14.4758	13.7603	7.61471	11.5507	13.5898	12.3123	9.48784	12.1367	12.3562	14.3202	9.51175	10.5353	11.7511	12.7215	8.36194	17.398	11.5245	13.7828	13.1581	14.0498	12.0172	13.4488
						TCGA-BRCA	TCGA-AO-A0JB	0	1542	white	50	0	2	8.43879	7.17991	7.94837	7.34873	9.54496	12.4745	11.4818	7.43463	10.5216	11.1774	9.12412	10.1254	10.1085	4.75489	10.3219	11.7275	12.7611	8.04985	9.8009	10.4221	12.5083	7.8009	6.35755	7.97154	9.45738	5.80735	14.7927	8.69349	9.52748	9.10852	13.1386	9.70044	10.2336
						TCGA-BRCA	TCGA-BH-A28O	0	1120	white	50	0	2	11.5459	8.33539	11.6952	12.0987	11.5488	12.2015	11.9901	10.2969	11.102	9.60177	11.5831	11.7591	12.3454	3.45943	10.062	11.8106	10.4305	10.952	10.5981	10.8903	12.5255	10.983	9.36194	11.2986	11.6022	9.48784	15.3015	10.0539	11.623	8.49185	12.1026	12.192	11.8525
[truncated: 5,622 more rows]
