# Supplementary material for: Purine metabolism: a pan-cancer metabolic dysregulation across circulation and tissues
Source: Mol Cancer. 2025 Oct 14;24:255. doi: 10.1186/s12943-025-02482-9 (PMC12522462; doi:10.1186/s12943-025-02482-9)
Supplement: Supplementary file 5 — Supplementary Material 5. [file 12943_2025_2482_MOESM5_ESM.xlsx]

## Sheet: Sheet1
Supplementary Table S31: Distribution of clinical characteristics by survival status across 17 cancer types.

## Sheet: BLCA
	TCGA-BLCA	Deceased(N=174)	Alived(N=221)	Total(N=395)	P	FDR
	time
	Mean±SD	565.26±537.51	1015.15±971.49	816.97±838.96
	Median[min-max]	414.00[19.00,3183.00]	636.00[0.50,5050.00]	539.00[0.50,5050.00]
	race				0.0098	0.02
	asian	9(2.28%)	34(8.61%)	43(10.89%)
	black or african american	13(3.29%)	10(2.53%)	23(5.82%)
	unknow	7(1.77%)	8(2.03%)	15(3.80%)
	white	145(36.71%)	169(42.78%)	314(79.49%)
	age
	Mean±SD	70.47±9.44	66.09±11.16	68.02±10.65
	Median[min-max]	70.50[45.00,90.00]	66.00[34.00,90.00]	69.00[34.00,90.00]
	gender				0.29	0.29
	Female	50(12.66%)	52(13.16%)	102(25.82%)
	Male	124(31.39%)	169(42.78%)	293(74.18%)
	stage				9.1e-07	2.7e-06
	Stage I + II	34(8.61%)	96(24.30%)	130(32.91%)
	Stage III+ IV	140(35.44%)	125(31.65%)	265(67.09%)
	gene_ADA
	Mean±SD	9.05±1.36	8.90±1.57	8.96±1.48
	Median[min-max]	9.01[4.86,12.58]	9.01[4.32,12.67]	9.01[4.32,12.67]
	gene_ADCY5
	Mean±SD	7.21±1.92	6.88±2.17	7.03±2.07
	Median[min-max]	7.16[2.32,12.68]	6.54[1.00,13.10]	6.79[1.00,13.10]
	gene_AMPD2
	Mean±SD	10.91±0.64	10.97±0.68	10.94±0.66
	Median[min-max]	10.93[9.16,12.84]	10.95[9.56,13.99]	10.94[9.16,13.99]
	gene_APRT
	Mean±SD	12.34±0.70	12.56±0.74	12.46±0.73
	Median[min-max]	12.34[9.30,14.24]	12.57[10.69,14.28]	12.47[9.30,14.28]
	gene_ATIC
	Mean±SD	12.00±0.77	11.96±0.74	11.98±0.75
	Median[min-max]	12.06[8.94,13.93]	12.01[10.21,13.76]	12.02[8.94,13.93]
	gene_DCK
	Mean±SD	9.85±0.89	9.84±1.00	9.84±0.95
	Median[min-max]	9.80[7.04,12.32]	9.85[5.49,12.56]	9.84[5.49,12.56]
	gene_DGUOK
	Mean±SD	10.72±0.52	10.92±0.59	10.83±0.57
	Median[min-max]	10.71[9.18,11.92]	10.94[9.22,12.82]	10.82[9.18,12.82]
	gene_GART
	Mean±SD	11.87±0.78	11.87±0.80	11.87±0.79
	Median[min-max]	11.92[9.68,13.70]	11.96[9.51,13.70]	11.94[9.51,13.70]
	gene_GMPS
	Mean±SD	12.04±0.79	11.95±0.81	11.99±0.80
	Median[min-max]	12.06[10.17,14.36]	12.03[9.00,14.11]	12.04[9.00,14.36]
	gene_HK2
	Mean±SD	11.98±1.35	12.15±1.13	12.08±1.23
	Median[min-max]	12.04[7.08,15.37]	12.23[8.84,14.82]	12.20[7.08,15.37]
	gene_HKDC1
	Mean±SD	4.61±2.51	4.50±2.46	4.55±2.48
	Median[min-max]	4.00[0.01,11.20]	4.00[0.01,12.94]	4.00[0.01,12.94]
	gene_HPRT1
	Mean±SD	10.87±0.83	10.95±0.91	10.92±0.87
	Median[min-max]	10.97[8.15,12.73]	10.96[8.20,14.71]	10.97[8.15,14.71]
	gene_IMPDH1
	Mean±SD	11.68±1.07	11.52±1.04	11.59±1.06
	Median[min-max]	11.71[8.82,14.23]	11.51[8.54,14.31]	11.61[8.54,14.31]
	gene_NME1
	Mean±SD	10.41±0.76	10.51±0.74	10.47±0.75
	Median[min-max]	10.43[8.39,12.23]	10.48[8.43,12.46]	10.47[8.39,12.46]
	gene_NPR1
	Mean±SD	7.85±1.43	7.68±1.40	7.76±1.41
	Median[min-max]	7.80[3.91,11.76]	7.51[4.58,13.41]	7.61[3.91,13.41]
	gene_NT5C3A
	Mean±SD	10.47±0.69	10.61±0.67	10.55±0.68
	Median[min-max]	10.48[8.71,12.13]	10.61[8.04,12.57]	10.55[8.04,12.57]
	gene_NUDT5
	Mean±SD	11.34±0.80	11.35±0.69	11.35±0.74
	Median[min-max]	11.29[9.42,13.55]	11.32[9.23,12.98]	11.30[9.23,13.55]
	gene_PAICS
	Mean±SD	12.66±0.83	12.68±0.86	12.67±0.84
	Median[min-max]	12.72[10.52,15.38]	12.71[9.21,14.94]	12.71[9.21,15.38]
	gene_PDE2A
	Mean±SD	7.76±1.33	7.66±1.23	7.70±1.27
	Median[min-max]	7.76[3.70,14.14]	7.55[4.75,11.93]	7.64[3.70,14.14]
	gene_PDE3A
	Mean±SD	7.43±1.38	6.97±1.35	7.17±1.38
	Median[min-max]	7.47[3.32,10.33]	7.02[3.00,10.41]	7.22[3.00,10.41]
	gene_PDE5A
	Mean±SD	8.85±1.33	8.49±1.10	8.65±1.22
	Median[min-max]	8.94[4.58,15.03]	8.45[5.52,12.96]	8.61[4.58,15.03]
	gene_PDE7A
	Mean±SD	10.59±0.94	10.79±0.98	10.70±0.97
	Median[min-max]	10.60[8.06,12.81]	10.78[7.69,13.61]	10.72[7.69,13.61]
	gene_PDE7B
	Mean±SD	7.11±1.50	7.39±1.61	7.27±1.57
	Median[min-max]	7.12[2.58,11.24]	7.40[2.58,12.13]	7.28[2.58,12.13]
	gene_PKM
	Mean±SD	16.16±0.95	16.12±0.95	16.14±0.95
	Median[min-max]	16.24[13.94,18.98]	16.07[13.31,18.65]	16.16[13.31,18.98]
	gene_PPAT
	Mean±SD	9.48±0.83	9.50±0.94	9.49±0.89
	Median[min-max]	9.49[7.42,12.22]	9.57[4.81,12.08]	9.49[4.81,12.22]
	gene_RRM2
	Mean±SD	11.91±1.27	11.67±1.28	11.78±1.28
	Median[min-max]	12.09[7.38,14.97]	11.77[6.81,14.72]	11.91[6.81,14.97]
	gene_TXN
	Mean±SD	13.20±0.95	13.37±0.91	13.29±0.93
	Median[min-max]	13.11[10.64,16.37]	13.33[11.11,16.86]	13.20[10.64,16.86]
	gene_TYMP
	Mean±SD	11.79±1.70	11.61±1.96	11.69±1.85
	Median[min-max]	11.77[6.77,15.64]	11.68[6.46,15.90]	11.72[6.46,15.90]
	gene_UCK2
	Mean±SD	10.45±0.94	10.45±0.93	10.45±0.93
	Median[min-max]	10.38[8.09,13.01]	10.43[8.09,13.02]	10.41[8.09,13.02]

## Sheet: BRCA
	TCGA-BRCA	Deceased(N=143)	Alived(N=917)	Total(N=1060)	P	FDR
	time
	Mean±SD	1631.81±1340.69	1168.66±1138.86	1231.14±1178.10
	Median[min-max]	1148.00[116.00,7455.00]	760.00[0.50,8605.00]	823.50[0.50,8605.00]
	race				0.05	0.1
	asian	3(0.28%)	58(5.47%)	61(5.75%)
	black or african american	27(2.55%)	149(14.06%)	176(16.60%)
	unknow	7(0.66%)	86(8.11%)	93(8.77%)
	white	106(10.00%)	624(58.87%)	730(68.87%)
	age
	Mean±SD	61.41±14.88	58.01±12.89	58.46±13.22
	Median[min-max]	62.00[26.00,90.00]	58.00[26.00,90.00]	58.00[26.00,90.00]
	gender				0.92	0.92
	Female	142(13.40%)	906(85.47%)	1048(98.87%)
	Male	1(0.09%)	11(1.04%)	12(1.13%)
	stage				2.3e-06	6.8e-06
	Stage I + II	83(7.83%)	706(66.60%)	789(74.43%)
	Stage III+ IV	60(5.66%)	211(19.91%)	271(25.57%)
	gene_ACADM
	Mean±SD	11.35±0.91	11.42±0.84	11.41±0.85
	Median[min-max]	11.45[6.64,13.50]	11.48[6.93,14.20]	11.47[6.64,14.20]
	gene_ADCY5
	Mean±SD	8.63±2.18	8.74±2.23	8.73±2.22
	Median[min-max]	8.72[3.32,13.45]	8.72[3.00,14.42]	8.72[3.00,14.42]
	gene_APRT
	Mean±SD	12.05±0.81	12.09±0.73	12.09±0.74
	Median[min-max]	12.03[9.65,14.42]	12.06[9.70,15.20]	12.06[9.65,15.20]
	gene_ATIC
	Mean±SD	12.79±0.65	12.72±0.63	12.73±0.63
	Median[min-max]	12.87[10.53,14.48]	12.73[10.13,14.37]	12.75[10.13,14.48]
	gene_DCK
	Mean±SD	10.81±0.90	10.72±0.87	10.74±0.88
	Median[min-max]	10.82[7.49,12.98]	10.75[6.61,13.25]	10.76[6.61,13.25]
	gene_GMPS
	Mean±SD	12.68±0.75	12.53±0.77	12.55±0.77
	Median[min-max]	12.64[10.48,14.45]	12.51[10.13,14.99]	12.54[10.13,14.99]
	gene_HPRT1
	Mean±SD	11.23±0.79	11.07±0.78	11.09±0.78
	Median[min-max]	11.20[8.84,13.33]	11.09[8.68,13.20]	11.10[8.68,13.33]
	gene_IMPDH1
	Mean±SD	12.22±0.80	12.15±0.73	12.15±0.74
	Median[min-max]	12.26[10.11,14.34]	12.15[9.09,15.03]	12.16[9.09,15.03]
	gene_NME1
	Mean±SD	11.75±0.91	11.75±0.99	11.75±0.98
	Median[min-max]	11.75[9.33,13.82]	11.63[8.74,16.41]	11.65[8.74,16.41]
	gene_NPR1
	Mean±SD	8.78±1.20	8.74±1.16	8.75±1.17
	Median[min-max]	8.85[5.55,11.65]	8.68[5.04,11.94]	8.70[5.04,11.94]
	gene_NT5C3A
	Mean±SD	10.88±0.67	10.78±0.74	10.80±0.73
	Median[min-max]	10.91[8.38,13.02]	10.74[8.07,14.04]	10.76[8.07,14.04]
	gene_NUDT5
	Mean±SD	11.95±0.68	11.84±0.71	11.85±0.71
	Median[min-max]	11.94[10.19,13.43]	11.77[9.72,14.73]	11.79[9.72,14.73]
	gene_PAICS
	Mean±SD	13.48±0.81	13.28±0.78	13.31±0.79
	Median[min-max]	13.46[11.63,16.18]	13.28[10.77,16.71]	13.31[10.77,16.71]
	gene_PDE2A
	Mean±SD	8.56±1.24	8.51±1.19	8.51±1.20
	Median[min-max]	8.53[5.64,12.14]	8.46[4.17,11.91]	8.47[4.17,12.14]
	gene_PDE3A
	Mean±SD	8.61±1.30	8.41±1.29	8.44±1.29
	Median[min-max]	8.50[3.17,13.59]	8.52[4.25,14.48]	8.52[3.17,14.48]
	gene_PDE5A
	Mean±SD	10.09±1.52	10.05±1.40	10.05±1.41
	Median[min-max]	9.99[6.85,15.38]	10.01[5.95,15.24]	10.01[5.95,15.38]
	gene_PDE7B
	Mean±SD	7.35±1.19	7.31±1.09	7.32±1.11
	Median[min-max]	7.25[3.00,10.53]	7.32[3.00,11.22]	7.32[3.00,11.22]
	gene_PKM
	Mean±SD	15.86±0.70	15.85±0.67	15.85±0.67
	Median[min-max]	15.82[14.04,17.75]	15.85[13.75,18.05]	15.85[13.75,18.05]
	gene_PPAT
	Mean±SD	10.63±0.97	10.44±0.88	10.46±0.90
	Median[min-max]	10.60[8.30,13.24]	10.49[6.83,14.38]	10.49[6.83,14.38]
	gene_RRM1
	Mean±SD	12.56±0.86	12.48±0.82	12.49±0.82
	Median[min-max]	12.56[9.73,14.99]	12.53[9.53,14.67]	12.53[9.53,14.99]
	gene_RRM2
	Mean±SD	11.42±1.43	11.19±1.40	11.22±1.41
	Median[min-max]	11.54[6.85,14.07]	11.28[4.75,15.58]	11.30[4.75,15.58]
	gene_TXN
	Mean±SD	13.33±0.74	13.19±0.72	13.21±0.72
	Median[min-max]	13.30[11.89,15.36]	13.17[10.95,15.79]	13.19[10.95,15.79]
	gene_TYMP
	Mean±SD	11.97±1.19	12.25±1.13	12.21±1.14
	Median[min-max]	11.95[7.51,14.44]	12.25[7.84,15.49]	12.21[7.51,15.49]

## Sheet: CESC
	TCGA-CESC	Deceased(N=26)	Alived(N=96)	Total(N=122)	P	FDR
	time
	Mean±SD	844.81±667.98	1131.63±1163.31	1070.50±1081.02
	Median[min-max]	801.00[100.00,2859.00]	789.50[0.50,6375.00]	789.50[0.50,6375.00]
	race				0.08	0.08
	american indian or alaskanative	2(1.64%)	0(0.0e+0%)	2(1.64%)
	asian	2(1.64%)	11(9.02%)	13(10.66%)
	black or african american	1(0.82%)	7(5.74%)	8(6.56%)
	unknow	3(2.46%)	15(12.30%)	18(14.75%)
	white	18(14.75%)	63(51.64%)	81(66.39%)
	age
	Mean±SD	51.81±15.93	47.79±11.41	48.65±12.55
	Median[min-max]	51.50[21.00,79.00]	48.00[24.00,78.00]	48.00[21.00,79.00]
	gender
	Female	26(21.31%)	96(78.69%)	122(100.00%)
	stage				0.04	0.07
	Stage I + II	14(11.48%)	74(60.66%)	88(72.13%)
	Stage III+ IV	12(9.84%)	22(18.03%)	34(27.87%)
	gene_ADCY5
	Mean±SD	6.53±1.82	7.07±2.16	6.96±2.09
	Median[min-max]	6.32[3.91,11.66]	6.82[1.58,13.68]	6.64[1.58,13.68]
	gene_APRT
	Mean±SD	12.31±0.73	12.46±0.66	12.43±0.67
	Median[min-max]	12.29[10.52,13.42]	12.45[10.03,14.18]	12.41[10.03,14.18]
	gene_DCK
	Mean±SD	10.99±0.76	10.52±1.15	10.62±1.10
	Median[min-max]	11.01[9.20,12.08]	10.68[5.78,12.61]	10.78[5.78,12.61]
	gene_GART
	Mean±SD	12.52±0.53	12.17±0.76	12.25±0.73
	Median[min-max]	12.67[11.46,13.63]	12.20[9.86,14.15]	12.23[9.86,14.15]
	gene_GMPS
	Mean±SD	13.06±0.55	12.87±0.82	12.91±0.77
	Median[min-max]	13.02[11.89,14.05]	13.03[10.07,14.24]	13.02[10.07,14.24]
	gene_HK2
	Mean±SD	12.92±0.95	12.42±1.19	12.52±1.16
	Median[min-max]	13.26[9.77,14.17]	12.52[9.35,15.53]	12.63[9.35,15.53]
	gene_HPRT1
	Mean±SD	11.78±0.66	11.74±0.74	11.75±0.72
	Median[min-max]	11.68[10.54,13.45]	11.74[9.47,13.29]	11.73[9.47,13.45]
	gene_NME1
	Mean±SD	12.06±0.69	12.05±0.83	12.05±0.80
	Median[min-max]	12.19[10.55,13.42]	12.08[9.32,13.82]	12.09[9.32,13.82]
	gene_NPR1
	Mean±SD	7.99±1.73	7.65±1.41	7.72±1.49
	Median[min-max]	7.64[5.39,12.39]	7.55[4.39,11.44]	7.55[4.39,12.39]
	gene_NUDT5
	Mean±SD	12.06±0.58	12.01±0.63	12.02±0.62
	Median[min-max]	12.02[10.77,13.43]	12.00[10.23,13.67]	12.02[10.23,13.67]
	gene_PAICS
	Mean±SD	13.28±0.79	12.97±0.90	13.03±0.89
	Median[min-max]	13.34[11.89,15.27]	13.02[9.67,15.49]	13.09[9.67,15.49]
	gene_PDE2A
	Mean±SD	7.13±1.25	6.88±1.42	6.93±1.39
	Median[min-max]	7.30[3.46,9.22]	6.94[3.70,10.96]	7.07[3.46,10.96]
	gene_PDE3A
	Mean±SD	7.31±1.98	6.90±2.09	6.99±2.07
	Median[min-max]	6.97[4.25,11.39]	6.69[2.58,13.76]	6.73[2.58,13.76]
	gene_PDE5A
	Mean±SD	9.19±1.50	9.03±1.30	9.06±1.34
	Median[min-max]	9.04[7.21,13.70]	8.91[5.95,12.47]	8.98[5.95,13.70]
	gene_PDE7A
	Mean±SD	11.25±0.99	11.05±0.99	11.09±0.99
	Median[min-max]	11.03[9.87,13.94]	11.07[7.56,14.06]	11.06[7.56,14.06]
	gene_PDE7B
	Mean±SD	6.22±1.34	6.35±1.51	6.32±1.47
	Median[min-max]	6.14[4.00,9.44]	6.16[3.00,10.82]	6.14[3.00,10.82]
	gene_PKM
	Mean±SD	16.79±0.64	16.61±0.77	16.65±0.75
	Median[min-max]	16.89[15.35,17.95]	16.55[14.90,18.52]	16.64[14.90,18.52]
	gene_PPAT
	Mean±SD	10.47±0.80	10.08±0.96	10.16±0.94
	Median[min-max]	10.49[9.02,12.16]	10.19[6.48,12.54]	10.24[6.48,12.54]
	gene_RRM1
	Mean±SD	13.17±0.67	12.90±0.84	12.96±0.81
	Median[min-max]	13.07[12.20,14.56]	13.02[10.78,14.39]	13.04[10.78,14.56]
	gene_RRM2
	Mean±SD	13.31±0.78	12.85±0.94	12.95±0.92
	Median[min-max]	13.38[11.01,14.52]	12.90[10.98,14.94]	12.99[10.98,14.94]
	gene_TXN
	Mean±SD	14.21±0.96	14.03±0.98	14.07±0.97
	Median[min-max]	14.04[12.26,16.09]	14.02[11.85,17.41]	14.02[11.85,17.41]
	gene_TYMP
	Mean±SD	13.80±1.63	13.63±1.49	13.66±1.51
	Median[min-max]	14.17[9.27,15.96]	13.94[9.21,16.27]	14.11[9.21,16.27]
	gene_UCK2
	Mean±SD	12.11±0.60	11.81±0.75	11.87±0.73
	Median[min-max]	12.24[10.91,12.89]	11.79[9.48,13.77]	11.87[9.48,13.77]

## Sheet: CHOL
	TCGA-CHOL	Deceased(N=18)	Alived(N=18)	Total(N=36)	P	FDR
	time
	Mean±SD	592.94±514.10	936.56±558.25	764.75±556.87
	Median[min-max]	500.00[21.00,1939.00]	942.50[10.00,1976.00]	645.00[10.00,1976.00]
	race				0.83	1
	asian	2(5.56%)	1(2.78%)	3(8.33%)
	black or african american	1(2.78%)	1(2.78%)	2(5.56%)
	white	15(41.67%)	16(44.44%)	31(86.11%)
	age
	Mean±SD	62.83±12.70	63.22±13.37	63.03±12.85
	Median[min-max]	65.00[31.00,81.00]	68.50[29.00,82.00]	66.50[29.00,82.00]
	gender				1	1
	Female	10(27.78%)	10(27.78%)	20(55.56%)
	Male	8(22.22%)	8(22.22%)	16(44.44%)
	stage				0.69	1
	Stage I + II	13(36.11%)	15(41.67%)	28(77.78%)
	Stage III+ IV	5(13.89%)	3(8.33%)	8(22.22%)
	gene_ACADM
	Mean±SD	11.08±0.80	11.30±0.86	11.19±0.83
	Median[min-max]	11.13[9.69,12.64]	11.56[9.72,12.68]	11.20[9.69,12.68]
	gene_ADA
	Mean±SD	8.16±0.86	8.34±0.97	8.25±0.91
	Median[min-max]	8.35[6.67,9.89]	8.24[6.30,10.56]	8.29[6.30,10.56]
	gene_ADCY3
	Mean±SD	9.54±1.11	9.77±0.62	9.65±0.89
	Median[min-max]	9.88[6.87,11.64]	9.72[8.22,10.99]	9.74[6.87,11.64]
	gene_AMPD2
	Mean±SD	11.23±0.88	11.56±0.50	11.40±0.73
	Median[min-max]	11.37[8.04,12.09]	11.57[10.74,12.74]	11.47[8.04,12.74]
	gene_APRT
	Mean±SD	12.27±0.68	12.33±0.84	12.30±0.75
	Median[min-max]	12.40[11.03,13.53]	12.30[10.44,13.74]	12.34[10.44,13.74]
	gene_ATIC
	Mean±SD	12.41±0.68	12.44±0.56	12.43±0.62
	Median[min-max]	12.55[10.38,13.24]	12.64[11.39,13.23]	12.59[10.38,13.24]
	gene_DCK
	Mean±SD	9.63±0.70	10.04±0.67	9.84±0.71
	Median[min-max]	9.68[7.50,10.60]	9.97[8.51,11.09]	9.92[7.50,11.09]
	gene_DGUOK
	Mean±SD	10.90±0.72	11.07±0.42	10.99±0.58
	Median[min-max]	11.04[8.60,11.66]	11.17[10.13,11.84]	11.09[8.60,11.84]
	gene_ENTPD2
	Mean±SD	9.21±1.02	9.20±1.75	9.21±1.41
	Median[min-max]	9.39[7.23,10.72]	9.63[4.32,11.65]	9.49[4.32,11.65]
	gene_GART
	Mean±SD	11.16±0.69	11.48±0.58	11.32±0.65
	Median[min-max]	11.20[9.37,12.31]	11.63[10.43,12.43]	11.36[9.37,12.43]
	gene_GMPS
	Mean±SD	11.33±0.49	11.54±0.57	11.43±0.54
	Median[min-max]	11.37[10.26,11.98]	11.68[10.25,12.16]	11.58[10.25,12.16]
	gene_HK2
	Mean±SD	8.73±1.95	9.65±1.53	9.19±1.79
	Median[min-max]	8.88[4.75,11.89]	9.47[6.48,13.60]	9.12[4.75,13.60]
	gene_HKDC1
	Mean±SD	12.28±1.22	12.02±1.89	12.15±1.57
	Median[min-max]	12.31[10.00,14.77]	12.53[7.13,15.05]	12.45[7.13,15.05]
	gene_IMPDH1
	Mean±SD	10.36±1.22	10.54±0.92	10.45±1.07
	Median[min-max]	10.51[8.27,12.39]	10.55[8.43,12.54]	10.55[8.27,12.54]
	gene_NME1
	Mean±SD	11.30±0.73	10.97±0.77	11.13±0.76
	Median[min-max]	11.24[9.71,12.76]	11.09[9.30,12.07]	11.13[9.30,12.76]
	gene_NT5C3A
	Mean±SD	10.31±0.64	10.62±0.49	10.46±0.58
	Median[min-max]	10.35[9.17,11.90]	10.65[9.69,11.68]	10.54[9.17,11.90]
	gene_PDE7A
	Mean±SD	10.40±1.14	10.88±1.26	10.64±1.21
	Median[min-max]	10.64[7.20,12.23]	10.95[8.85,13.75]	10.72[7.20,13.75]
	gene_PKM
	Mean±SD	15.55±1.01	15.53±0.74	15.54±0.87
	Median[min-max]	15.64[12.82,16.81]	15.56[14.21,16.83]	15.63[12.82,16.83]
	gene_PPAT
	Mean±SD	8.76±0.88	8.74±0.91	8.75±0.88
	Median[min-max]	8.91[6.15,9.94]	9.11[6.23,9.50]	8.93[6.15,9.94]
	gene_RRM1
	Mean±SD	11.38±0.54	11.50±0.56	11.44±0.54
	Median[min-max]	11.37[10.37,12.45]	11.56[10.49,12.56]	11.50[10.37,12.56]
	gene_RRM2
	Mean±SD	10.34±0.77	9.70±1.35	10.02±1.13
	Median[min-max]	10.43[8.70,11.36]	9.87[6.74,11.83]	10.16[6.74,11.83]
	gene_TXN
	Mean±SD	12.54±0.68	12.58±0.76	12.56±0.71
	Median[min-max]	12.40[11.38,14.23]	12.53[11.31,14.08]	12.40[11.31,14.23]
	gene_TYMP
	Mean±SD	11.77±1.17	12.32±1.10	12.04±1.15
	Median[min-max]	11.85[9.53,13.35]	12.48[9.15,13.93]	12.33[9.15,13.93]
	gene_UCK2
	Mean±SD	10.92±0.90	11.13±0.87	11.03±0.88
	Median[min-max]	11.00[8.47,12.15]	11.23[9.69,12.77]	11.11[8.47,12.77]

## Sheet: COAD
	TCGA-COAD	Alived(N=346)	Deceased(N=98)	Total(N=444)	P	FDR
	time
	Mean±SD	875.78±751.14	627.01±692.67	820.87±745.07
	Median[min-max]	722.00[0.50,4270.00]	362.50[0.50,3042.00]	646.50[0.50,4270.00]
	race				0.36	0.72
	american indian or alaska native	1(0.23%)	0(0.0e+0%)	1(0.23%)
	asian	9(2.03%)	2(0.45%)	11(2.48%)
	black or african american	46(10.36%)	13(2.93%)	59(13.29%)
	unknow	137(30.86%)	29(6.53%)	166(37.39%)
	white	153(34.46%)	54(12.16%)	207(46.62%)
	age
	Mean±SD	66.10±12.86	69.78±13.50	66.91±13.08
	Median[min-max]	67.00[31.00,90.00]	73.00[34.00,90.00]	68.50[31.00,90.00]
	gender				0.71	0.72
	Female	165(37.16%)	44(9.91%)	209(47.07%)
	Male	181(40.77%)	54(12.16%)	235(52.93%)
	stage				5.7e-07	1.7e-06
	Stage I + II	217(48.87%)	33(7.43%)	250(56.31%)
	Stage III+ IV	129(29.05%)	65(14.64%)	194(43.69%)
	gene_ACADM
	Mean±SD	10.10±1.26	10.04±1.20	10.08±1.25
	Median[min-max]	10.28[5.00,13.26]	10.32[6.61,12.15]	10.28[5.00,13.26]
	gene_ADA
	Mean±SD	8.35±1.13	8.60±1.18	8.41±1.15
	Median[min-max]	8.41[3.91,11.97]	8.74[5.52,11.44]	8.50[3.91,11.97]
	gene_ADCY3
	Mean±SD	10.55±1.05	10.59±1.05	10.56±1.05
	Median[min-max]	10.60[6.23,13.10]	10.55[7.09,12.71]	10.59[6.23,13.10]
	gene_ADCY5
	Mean±SD	6.38±1.69	6.70±1.81	6.45±1.72
	Median[min-max]	6.22[1.58,11.65]	6.51[3.00,11.57]	6.34[1.58,11.65]
	gene_AMPD2
	Mean±SD	10.81±0.99	10.93±0.92	10.83±0.98
	Median[min-max]	10.95[6.55,12.64]	11.11[7.55,12.95]	10.97[6.55,12.95]
	gene_APRT
	Mean±SD	12.06±0.81	12.21±0.86	12.09±0.82
	Median[min-max]	12.17[8.20,14.78]	12.23[9.65,14.07]	12.17[8.20,14.78]
	gene_ATIC
	Mean±SD	12.16±0.89	12.33±0.91	12.20±0.90
	Median[min-max]	12.19[7.73,13.92]	12.41[9.76,13.94]	12.25[7.73,13.94]
	gene_DGUOK
	Mean±SD	10.49±0.86	10.67±0.99	10.53±0.89
	Median[min-max]	10.57[6.82,12.60]	10.87[6.41,12.80]	10.61[6.41,12.80]
	gene_ENTPD2
	Mean±SD	9.84±1.30	10.03±1.39	9.88±1.32
	Median[min-max]	9.87[4.91,13.28]	10.11[6.52,13.24]	9.94[4.91,13.28]
	gene_GART
	Mean±SD	11.71±1.00	11.80±0.93	11.73±0.98
	Median[min-max]	11.82[7.40,13.84]	11.85[9.01,13.42]	11.82[7.40,13.84]
	gene_GMPS
	Mean±SD	11.33±0.99	11.45±0.95	11.35±0.98
	Median[min-max]	11.49[6.27,13.27]	11.59[8.65,13.14]	11.53[6.27,13.27]
	gene_IMPDH1
	Mean±SD	11.55±0.98	11.70±1.06	11.58±1.00
	Median[min-max]	11.63[6.36,13.46]	11.78[8.50,13.99]	11.64[6.36,13.99]
	gene_NME1
	Mean±SD	11.27±0.95	11.29±1.08	11.28±0.98
	Median[min-max]	11.40[7.38,13.59]	11.47[8.35,13.84]	11.40[7.38,13.84]
	gene_NPR1
	Mean±SD	6.62±1.27	6.81±1.30	6.67±1.28
	Median[min-max]	6.53[3.00,11.22]	6.55[3.00,10.45]	6.54[3.00,11.22]
	gene_PAICS
	Mean±SD	12.70±1.11	12.75±1.13	12.71±1.12
	Median[min-max]	12.80[8.28,15.44]	13.03[9.32,14.88]	12.82[8.28,15.44]
	gene_PDE2A
	Mean±SD	6.34±1.34	6.49±1.32	6.37±1.34
	Median[min-max]	6.23[3.00,10.80]	6.29[3.32,10.26]	6.23[3.00,10.80]
	gene_PDE3A
	Mean±SD	8.64±1.85	8.63±1.87	8.64±1.85
	Median[min-max]	8.57[3.46,13.72]	8.37[2.32,13.62]	8.52[2.32,13.72]
	gene_PDE5A
	Mean±SD	9.02±1.44	9.05±1.41	9.02±1.43
	Median[min-max]	9.21[1.58,12.85]	9.08[5.29,12.54]	9.12[1.58,12.85]
	gene_PDE7B
	Mean±SD	4.99±1.40	4.90±1.46	4.97±1.41
	Median[min-max]	4.91[0.01,9.04]	4.83[2.00,9.19]	4.91[0.01,9.19]
	gene_PPAT
	Mean±SD	9.67±1.24	9.69±1.26	9.67±1.24
	Median[min-max]	9.91[4.09,12.52]	10.06[4.46,11.74]	9.95[4.09,12.52]
	gene_RRM1
	Mean±SD	11.49±1.03	11.59±1.02	11.51±1.03
	Median[min-max]	11.62[6.89,13.87]	11.74[7.99,13.41]	11.65[6.89,13.87]
	gene_RRM2
	Mean±SD	11.85±1.04	11.83±1.11	11.85±1.06
	Median[min-max]	11.89[7.26,14.11]	11.96[8.27,14.30]	11.91[7.26,14.30]

## Sheet: ESCA
	TCGA-ESCA	Alived(N=99)	Deceased(N=63)	Total(N=162)	P	FDR
	time
	Mean±SD	567.88±511.40	542.30±499.48	557.93±505.39
	Median[min-max]	403.00[4.00,3714.00]	393.00[9.00,2532.00]	402.50[4.00,3714.00]
	race				2.9e-05	8.7e-05
	asian	37(22.84%)	9(5.56%)	46(28.40%)
	black or african american	2(1.23%)	1(0.62%)	3(1.85%)
	unknow	3(1.85%)	16(9.88%)	19(11.73%)
	white	57(35.19%)	37(22.84%)	94(58.02%)
	age
	Mean±SD	61.88±12.17	63.25±11.64	62.41±11.95
	Median[min-max]	60.00[36.00,86.00]	62.00[43.00,90.00]	60.00[36.00,90.00]
	gender				0.04	0.04
	Female	20(12.35%)	5(3.09%)	25(15.43%)
	Male	79(48.77%)	58(35.80%)	137(84.57%)
	stage				0.02	0.04
	Stage I + II	67(41.36%)	30(18.52%)	97(59.88%)
	Stage III+ IV	32(19.75%)	33(20.37%)	65(40.12%)
	gene_ACADM
	Mean±SD	11.32±0.59	11.41±0.93	11.35±0.74
	Median[min-max]	11.34[9.96,12.87]	11.22[8.99,13.75]	11.31[8.99,13.75]
	gene_ADCY5
	Mean±SD	8.73±2.00	8.53±2.02	8.65±2.00
	Median[min-max]	8.68[4.52,14.60]	8.40[4.81,13.54]	8.57[4.52,14.60]
	gene_AMPD2
	Mean±SD	11.48±0.62	11.57±0.78	11.52±0.68
	Median[min-max]	11.51[10.05,13.25]	11.50[9.46,13.61]	11.51[9.46,13.61]
	gene_APRT
	Mean±SD	12.24±0.68	12.29±0.67	12.26±0.67
	Median[min-max]	12.24[10.52,14.19]	12.29[10.87,14.31]	12.24[10.52,14.31]
	gene_ATIC
	Mean±SD	12.47±0.74	12.54±0.67	12.49±0.71
	Median[min-max]	12.56[10.57,14.02]	12.56[10.38,13.79]	12.56[10.38,14.02]
	gene_DCK
	Mean±SD	11.26±0.61	11.26±0.79	11.26±0.68
	Median[min-max]	11.28[9.58,12.77]	11.25[8.68,13.15]	11.27[8.68,13.15]
	gene_DGUOK
	Mean±SD	10.78±0.53	10.70±0.53	10.75±0.53
	Median[min-max]	10.77[9.38,12.30]	10.78[8.68,11.65]	10.78[8.68,12.30]
	gene_ENTPD2
	Mean±SD	9.81±1.79	9.53±1.57	9.71±1.71
	Median[min-max]	9.81[4.70,14.84]	9.54[4.17,12.16]	9.70[4.17,14.84]
	gene_GART
	Mean±SD	12.77±0.61	12.62±0.72	12.71±0.65
	Median[min-max]	12.73[11.12,14.56]	12.66[10.81,14.26]	12.72[10.81,14.56]
	gene_GMPS
	Mean±SD	13.17±0.75	13.02±0.87	13.11±0.80
	Median[min-max]	13.17[11.47,14.83]	12.93[10.54,15.10]	13.10[10.54,15.10]
	gene_HK2
	Mean±SD	13.17±1.22	13.25±1.22	13.20±1.22
	Median[min-max]	13.20[8.50,16.39]	13.32[10.51,15.73]	13.26[8.50,16.39]
	gene_HKDC1
	Mean±SD	7.86±3.72	8.48±3.70	8.10±3.71
	Median[min-max]	7.79[1.00,14.63]	8.94[2.00,14.38]	8.46[1.00,14.63]
	gene_HPRT1
	Mean±SD	11.73±0.67	11.71±0.77	11.73±0.71
	Median[min-max]	11.78[9.79,13.03]	11.54[9.18,13.09]	11.73[9.18,13.09]
	gene_IMPDH1
	Mean±SD	12.35±0.90	12.30±0.92	12.33±0.90
	Median[min-max]	12.36[10.04,14.18]	12.45[10.32,14.28]	12.37[10.04,14.28]
	gene_NME1
	Mean±SD	11.03±0.78	10.92±0.72	10.98±0.76
	Median[min-max]	11.08[8.90,13.48]	10.88[9.44,13.50]	11.02[8.90,13.50]
	gene_NPR1
	Mean±SD	8.18±1.32	8.27±1.19	8.21±1.27
	Median[min-max]	8.25[5.29,13.05]	8.20[5.29,10.94]	8.22[5.29,13.05]
	gene_NT5C3A
	Mean±SD	11.46±0.75	11.79±0.98	11.59±0.86
	Median[min-max]	11.49[8.79,13.62]	11.84[8.96,14.11]	11.63[8.79,14.11]
	gene_NUDT5
	Mean±SD	11.78±0.66	11.86±0.73	11.81±0.68
	Median[min-max]	11.74[10.20,13.58]	11.91[9.98,14.21]	11.75[9.98,14.21]
	gene_PAICS
	Mean±SD	13.48±0.80	13.41±0.80	13.45±0.79
	Median[min-max]	13.45[11.36,15.28]	13.43[10.80,15.15]	13.44[10.80,15.28]
	gene_PDE2A
	Mean±SD	8.36±1.18	8.76±1.27	8.51±1.23
	Median[min-max]	8.22[6.13,11.64]	8.78[5.36,11.34]	8.48[5.36,11.64]
	gene_PDE7A
	Mean±SD	11.57±0.96	11.40±1.03	11.51±0.99
	Median[min-max]	11.51[9.77,15.07]	11.20[8.94,13.59]	11.37[8.94,15.07]
	gene_PDE7B
	Mean±SD	7.41±1.13	7.54±1.28	7.46±1.19
	Median[min-max]	7.39[4.46,10.11]	7.71[5.29,9.89]	7.46[4.46,10.11]
	gene_PKM
	Mean±SD	16.77±0.82	16.52±0.81	16.67±0.82
	Median[min-max]	16.88[14.70,18.54]	16.43[14.89,18.36]	16.72[14.70,18.54]
	gene_PPAT
	Mean±SD	10.80±0.78	10.78±0.90	10.79±0.83
	Median[min-max]	10.82[8.94,12.63]	10.71[7.75,13.22]	10.82[7.75,13.22]
	gene_RRM1
	Mean±SD	12.72±0.85	12.67±0.83	12.70±0.84
	Median[min-max]	12.70[10.53,15.46]	12.81[10.46,14.98]	12.74[10.46,15.46]
	gene_RRM2
	Mean±SD	12.84±0.92	12.79±0.96	12.82±0.93
	Median[min-max]	12.95[9.87,15.14]	12.78[10.13,14.96]	12.92[9.87,15.14]
	gene_TXN
	Mean±SD	14.34±0.98	14.27±0.91	14.31±0.95
	Median[min-max]	14.38[11.92,17.27]	14.12[12.25,16.74]	14.31[11.92,17.27]
	gene_TYMP
	Mean±SD	13.04±1.27	12.84±1.40	12.96±1.32
	Median[min-max]	13.00[9.76,15.94]	12.84[9.17,15.82]	12.94[9.17,15.94]
	gene_UCK2
	Mean±SD	11.41±0.65	11.33±0.73	11.38±0.68
	Median[min-max]	11.37[9.65,13.22]	11.36[9.48,14.00]	11.36[9.48,14.00]

## Sheet: KIRC
	TCGA-KIRC	Deceased(N=173)	Alived(N=353)	Total(N=526)	P	FDR
	time
	Mean±SD	965.79±770.54	1536.99±1022.88	1349.12±983.96
	Median[min-max]	819.00[2.00,3615.00]	1459.00[0.50,4537.00]	1200.00[0.50,4537.00]
	race				0.08	0.15
	asian	1(0.19%)	7(1.33%)	8(1.52%)
	black or african american	11(2.09%)	45(8.56%)	56(10.65%)
	unknow	2(0.38%)	5(0.95%)	7(1.33%)
	white	159(30.23%)	296(56.27%)	455(86.50%)
	age
	Mean±SD	64.27±11.98	58.86±11.76	60.64±12.09
	Median[min-max]	64.00[32.00,90.00]	59.00[26.00,86.00]	61.00[26.00,90.00]
	gender				0.7	0.7
	Female	63(11.98%)	121(23.00%)	184(34.98%)
	Male	110(20.91%)	232(44.11%)	342(65.02%)
	stage				2.1e-19	6.3e-19
	Stage I + II	57(10.84%)	262(49.81%)	319(60.65%)
	Stage III+ IV	116(22.05%)	91(17.30%)	207(39.35%)
	gene_ACADM
	Mean±SD	11.57±1.02	12.14±1.00	11.95±1.04
	Median[min-max]	11.54[8.62,14.00]	12.29[7.68,14.69]	12.08[7.68,14.69]
	gene_ADA
	Mean±SD	9.51±1.12	9.09±0.96	9.23±1.03
	Median[min-max]	9.44[5.83,12.89]	9.11[5.58,13.57]	9.20[5.58,13.57]
	gene_ADCY3
	Mean±SD	10.90±0.93	10.99±0.96	10.96±0.95
	Median[min-max]	11.05[6.13,13.24]	11.10[6.11,13.08]	11.07[6.11,13.24]
	gene_ENTPD2
	Mean±SD	8.76±1.71	9.25±1.40	9.09±1.52
	Median[min-max]	9.18[1.00,11.53]	9.46[1.58,12.43]	9.34[1.00,12.43]
	gene_HK2
	Mean±SD	12.17±1.33	12.16±1.44	12.16±1.40
	Median[min-max]	12.31[5.73,14.74]	12.39[3.81,14.70]	12.33[3.81,14.74]
	gene_IMPDH1
	Mean±SD	10.77±0.79	10.40±0.76	10.52±0.79
	Median[min-max]	10.79[8.92,13.47]	10.48[6.21,12.20]	10.58[6.21,13.47]
	gene_NME1
	Mean±SD	10.85±0.80	10.46±0.70	10.59±0.75
	Median[min-max]	10.82[8.81,13.43]	10.44[8.52,13.09]	10.56[8.52,13.43]
	gene_NPR1
	Mean±SD	11.34±1.30	11.46±1.08	11.42±1.16
	Median[min-max]	11.45[7.24,14.53]	11.63[7.19,15.24]	11.56[7.19,15.24]
	gene_NT5C3A
	Mean±SD	10.98±0.71	10.90±0.69	10.93±0.70
	Median[min-max]	11.02[8.80,14.91]	10.90[7.97,13.26]	10.93[7.97,14.91]
	gene_PDE7A
	Mean±SD	11.04±0.90	11.10±0.84	11.08±0.86
	Median[min-max]	11.10[7.95,13.63]	11.14[7.55,14.00]	11.14[7.55,14.00]
	gene_PDE7B
	Mean±SD	9.14±1.28	9.69±1.06	9.51±1.17
	Median[min-max]	9.34[5.32,11.79]	9.83[6.69,12.02]	9.62[5.32,12.02]
	gene_RRM2
	Mean±SD	9.54±1.39	9.04±1.11	9.20±1.23
	Median[min-max]	9.49[5.04,13.83]	9.04[4.25,13.29]	9.20[4.25,13.83]
	gene_TYMP
	Mean±SD	12.59±1.07	12.20±1.14	12.33±1.13
	Median[min-max]	12.74[7.08,14.95]	12.34[7.20,15.20]	12.47[7.08,15.20]

## Sheet: HNSC
	TCGA-HNSC	Deceased(N=187)	Alived(N=248)	Total(N=435)	P	FDR
	time
	Mean±SD	748.28±925.00	1064.62±847.70	928.63±894.56
	Median[min-max]	436.00[2.00,6417.00]	830.00[11.00,5480.00]	644.00[2.00,6417.00]
	race				0.84	0.84
	american indian or alaskanative	1(0.23%)	0(0.0e+0%)	1(0.23%)
	asian	4(0.92%)	6(1.38%)	10(2.30%)
	black or african american	17(3.91%)	22(5.06%)	39(8.97%)
	unknow	6(1.38%)	9(2.07%)	15(3.45%)
	white	159(36.55%)	211(48.51%)	370(85.06%)
	age
	Mean±SD	63.25±12.70	59.22±11.39	60.95±12.12
	Median[min-max]	63.00[24.00,89.00]	60.00[19.00,85.00]	61.00[19.00,89.00]
	gender				0.09	0.18
	Female	59(13.56%)	59(13.56%)	118(27.13%)
	Male	128(29.43%)	189(43.45%)	317(72.87%)
	stage				0.02	0.05
	Stage I + II	32(7.36%)	68(15.63%)	100(22.99%)
	Stage III+ IV	155(35.63%)	180(41.38%)	335(77.01%)
	gene_ACADM
	Mean±SD	10.59±0.77	10.47±0.92	10.52±0.86
	Median[min-max]	10.60[6.07,12.81]	10.53[6.07,12.71]	10.57[6.07,12.81]
	gene_ADA
	Mean±SD	10.55±1.03	10.28±0.98	10.40±1.01
	Median[min-max]	10.52[5.93,14.02]	10.27[6.71,12.75]	10.40[5.93,14.02]
	gene_ADCY3
	Mean±SD	11.37±0.87	11.27±0.97	11.32±0.93
	Median[min-max]	11.44[7.70,13.13]	11.27[8.03,13.74]	11.36[7.70,13.74]
	gene_ADCY5
	Mean±SD	6.26±1.88	6.34±1.92	6.31±1.90
	Median[min-max]	6.15[1.58,11.76]	6.06[2.00,11.95]	6.09[1.58,11.95]
	gene_ATIC
	Mean±SD	12.11±0.60	11.95±0.65	12.02±0.63
	Median[min-max]	12.12[10.29,14.27]	11.95[10.19,13.74]	12.04[10.19,14.27]
	gene_DCK
	Mean±SD	10.32±0.82	10.18±0.95	10.24±0.90
	Median[min-max]	10.39[5.78,12.62]	10.24[6.88,12.15]	10.32[5.78,12.62]
	gene_DGUOK
	Mean±SD	11.09±0.57	11.02±0.62	11.05±0.60
	Median[min-max]	11.08[9.61,13.40]	11.03[9.30,13.00]	11.05[9.30,13.40]
	gene_GMPS
	Mean±SD	12.66±0.76	12.43±0.84	12.53±0.82
	Median[min-max]	12.67[9.64,14.72]	12.45[9.96,15.05]	12.55[9.64,15.05]
	gene_HKDC1
	Mean±SD	6.13±2.52	6.01±2.31	6.06±2.40
	Median[min-max]	5.81[0.01,12.31]	5.64[1.58,12.01]	5.67[0.01,12.31]
	gene_HPRT1
	Mean±SD	11.38±0.68	11.04±0.68	11.19±0.70
	Median[min-max]	11.38[9.49,13.34]	11.02[9.48,12.58]	11.17[9.48,13.34]
	gene_IMPDH1
	Mean±SD	12.32±0.77	12.20±0.83	12.25±0.81
	Median[min-max]	12.30[10.12,14.47]	12.23[9.31,14.88]	12.26[9.31,14.88]
	gene_NME1
	Mean±SD	11.73±0.59	11.66±0.74	11.69±0.68
	Median[min-max]	11.72[10.32,14.55]	11.64[9.79,13.89]	11.66[9.79,14.55]
	gene_NPR1
	Mean±SD	7.58±1.24	7.60±1.29	7.59±1.27
	Median[min-max]	7.54[4.75,11.26]	7.57[2.32,12.62]	7.56[2.32,12.62]
	gene_NUDT5
	Mean±SD	11.55±0.55	11.52±0.71	11.53±0.65
	Median[min-max]	11.59[9.73,12.71]	11.47[9.60,13.65]	11.51[9.60,13.65]
	gene_PAICS
	Mean±SD	13.04±0.71	12.82±0.77	12.91±0.76
	Median[min-max]	13.04[10.63,14.99]	12.82[10.67,14.52]	12.96[10.63,14.99]
	gene_PDE2A
	Mean±SD	8.01±1.14	7.98±1.17	8.00±1.16
	Median[min-max]	7.91[5.21,10.83]	7.86[4.95,13.17]	7.90[4.95,13.17]
	gene_PDE7A
	Mean±SD	10.90±0.95	10.72±0.91	10.80±0.93
	Median[min-max]	10.88[8.65,13.76]	10.73[8.06,12.88]	10.80[8.06,13.76]
	gene_PKM
	Mean±SD	17.05±0.70	16.82±0.68	16.92±0.70
	Median[min-max]	17.10[14.92,18.66]	16.88[14.33,19.30]	16.97[14.33,19.30]
	gene_PPAT
	Mean±SD	10.14±0.81	9.90±0.91	10.00±0.88
	Median[min-max]	10.17[6.71,12.28]	9.98[7.16,11.97]	10.06[6.71,12.28]
	gene_RRM1
	Mean±SD	12.75±0.66	12.59±0.81	12.66±0.75
	Median[min-max]	12.79[10.86,14.23]	12.62[10.15,14.67]	12.68[10.15,14.67]
	gene_RRM2
	Mean±SD	12.25±0.84	12.13±0.97	12.18±0.92
	Median[min-max]	12.32[9.67,14.56]	12.17[9.24,14.60]	12.23[9.24,14.60]
	gene_TYMP
	Mean±SD	14.25±1.20	14.27±1.13	14.26±1.16
	Median[min-max]	14.38[8.10,16.77]	14.44[10.94,16.68]	14.42[8.10,16.77]

## Sheet: LIHC
	TCGA-LIHC	Alived(N=231)	Deceased(N=121)	Total(N=352)	P	FDR
	time
	Mean±SD	890.70±750.58	621.84±679.60	798.28±737.17
	Median[min-max]	638.00[0.50,3675.00]	381.00[9.00,3258.00]	572.00[0.50,3675.00]
	race				0.16	0.18
	american indian or alaskanative	2(0.57%)	0(0.0e+0%)	2(0.57%)
	asian	113(32.10%)	44(12.50%)	157(44.60%)
	black or african american	9(2.56%)	5(1.42%)	14(3.98%)
	unknow	5(1.42%)	4(1.14%)	9(2.56%)
	white	102(28.98%)	68(19.32%)	170(48.30%)
	age
	Mean±SD	57.87±13.30	61.05±13.64	58.96±13.49
	Median[min-max]	60.00[16.00,84.00]	63.00[18.00,85.00]	61.00[16.00,85.00]
	gender				0.09	0.18
	Female	66(18.75%)	46(13.07%)	112(31.82%)
	Male	165(46.88%)	75(21.31%)	240(68.18%)
	stage				5.3e-07	1.6e-06
	Stage I + II	189(53.69%)	68(19.32%)	257(73.01%)
	Stage III+ IV	42(11.93%)	53(15.06%)	95(26.99%)
	gene_ACADM
	Mean±SD	11.79±1.22	11.86±1.33	11.82±1.26
	Median[min-max]	11.87[7.62,14.45]	11.89[7.48,14.75]	11.87[7.48,14.75]
	gene_ADA
	Mean±SD	8.03±1.04	8.53±0.95	8.20±1.04
	Median[min-max]	8.03[5.21,11.60]	8.46[6.32,10.99]	8.21[5.21,11.60]
	gene_ADCY3
	Mean±SD	7.68±1.36	7.88±1.25	7.75±1.32
	Median[min-max]	7.77[3.46,11.68]	7.71[5.09,11.30]	7.77[3.46,11.68]
	gene_AMPD2
	Mean±SD	11.07±0.79	11.19±0.85	11.11±0.81
	Median[min-max]	11.04[8.54,13.02]	11.07[8.80,13.35]	11.05[8.54,13.35]
	gene_APRT
	Mean±SD	11.96±0.77	12.13±0.80	12.02±0.78
	Median[min-max]	11.90[9.99,14.45]	12.18[9.98,14.42]	11.98[9.98,14.45]
	gene_ATIC
	Mean±SD	11.51±0.76	11.86±0.79	11.63±0.79
	Median[min-max]	11.47[9.22,13.39]	11.85[9.87,13.90]	11.57[9.22,13.90]
	gene_DCK
	Mean±SD	8.69±1.13	9.03±1.22	8.81±1.17
	Median[min-max]	8.75[3.58,11.48]	9.21[5.21,11.67]	8.96[3.58,11.67]
	gene_DGUOK
	Mean±SD	10.22±0.66	10.36±0.76	10.27±0.70
	Median[min-max]	10.18[7.75,12.71]	10.32[8.43,12.61]	10.25[7.75,12.71]
	gene_ENTPD2
	Mean±SD	6.81±1.70	7.17±1.88	6.93±1.77
	Median[min-max]	6.83[2.00,11.98]	7.09[2.58,11.92]	6.88[2.00,11.98]
	gene_GART
	Mean±SD	10.76±0.80	10.94±0.81	10.82±0.81
	Median[min-max]	10.80[8.13,12.80]	10.92[8.26,12.75]	10.83[8.13,12.80]
	gene_GMPS
	Mean±SD	10.83±0.81	11.16±0.87	10.94±0.84
	Median[min-max]	10.82[7.85,12.72]	11.19[9.03,12.88]	10.96[7.85,12.88]
	gene_HKDC1
	Mean±SD	9.60±2.63	10.09±2.41	9.77±2.56
	Median[min-max]	10.27[1.58,14.74]	10.55[2.00,13.91]	10.35[1.58,14.74]
	gene_HPRT1
	Mean±SD	10.15±0.90	10.38±0.92	10.23±0.91
	Median[min-max]	10.22[7.21,12.30]	10.34[8.13,13.56]	10.27[7.21,13.56]
	gene_IMPDH1
	Mean±SD	8.52±1.43	9.15±1.50	8.74±1.48
	Median[min-max]	8.34[5.39,12.83]	8.99[6.04,12.87]	8.56[5.39,12.87]
	gene_NME1
	Mean±SD	11.13±0.90	11.45±0.99	11.24±0.95
	Median[min-max]	11.03[9.08,14.01]	11.49[8.95,13.83]	11.19[8.95,14.01]
	gene_NT5C3A
	Mean±SD	9.15±0.86	9.37±0.88	9.23±0.87
	Median[min-max]	9.10[7.13,12.23]	9.31[7.61,11.74]	9.17[7.13,12.23]
	gene_NUDT5
	Mean±SD	11.89±0.68	12.04±0.67	11.94±0.68
	Median[min-max]	11.87[9.85,14.20]	11.99[10.72,14.39]	11.91[9.85,14.39]
	gene_PDE2A
	Mean±SD	8.22±1.35	7.97±1.32	8.13±1.34
	Median[min-max]	8.43[4.17,11.18]	8.04[4.91,11.61]	8.31[4.17,11.61]
	gene_PDE7A
	Mean±SD	8.54±1.07	8.82±1.14	8.63±1.10
	Median[min-max]	8.48[5.00,11.70]	8.80[6.77,12.05]	8.56[5.00,12.05]
	gene_PDE7B
	Mean±SD	6.38±1.40	6.42±1.32	6.40±1.37
	Median[min-max]	6.39[1.58,10.46]	6.23[2.32,11.14]	6.29[1.58,11.14]
	gene_PKM
	Mean±SD	11.95±1.67	12.53±1.64	12.15±1.68
	Median[min-max]	11.82[8.54,17.24]	12.53[9.03,17.93]	11.92[8.54,17.93]
	gene_PPAT
	Mean±SD	8.51±0.98	8.86±0.99	8.63±1.00
	Median[min-max]	8.55[5.73,10.86]	8.89[5.95,11.35]	8.64[5.73,11.35]
	gene_RRM1
	Mean±SD	10.66±0.88	10.97±1.00	10.77±0.94
	Median[min-max]	10.76[8.51,13.25]	10.89[8.59,14.10]	10.82[8.51,14.10]
	gene_RRM2
	Mean±SD	9.72±1.53	10.34±1.43	9.93±1.53
	Median[min-max]	9.91[5.75,12.59]	10.48[6.52,14.22]	10.21[5.75,14.22]
	gene_TXN
	Mean±SD	13.47±0.89	13.70±0.95	13.55±0.91
	Median[min-max]	13.51[10.92,16.48]	13.66[11.59,16.56]	13.54[10.92,16.56]
	gene_TYMP
	Mean±SD	11.77±1.33	12.01±1.28	11.85±1.32
	Median[min-max]	11.82[7.79,15.37]	12.04[8.61,15.74]	11.93[7.79,15.74]
	gene_UCK2
	Mean±SD	10.23±0.97	10.72±1.04	10.40±1.02
	Median[min-max]	10.17[7.85,12.55]	10.74[8.12,13.85]	10.42[7.85,13.85]

[truncated: 8 more sheets: LUAD, LUSC, PAAD, PRAD, READ, STAD, THCA, UCEC]
