# Supplementary material for: Purine metabolism: a pan-cancer metabolic dysregulation across circulation and tissues
Source: Mol Cancer. 2025 Oct 14;24:255. doi: 10.1186/s12943-025-02482-9 (PMC12522462; doi:10.1186/s12943-025-02482-9)
Supplement: Supplementary file 6 — Supplementary Material 6. [file 12943_2025_2482_MOESM6_ESM.xlsx]

## Sheet: Supplementary Table S32
Supplemenary Table S32: Evaluation metrics for all prognostic models across the 17 tumor types.
Cancer_Type	Best prognostic model in each type	Predictors_gene_in_model	Modeling_Procedure	Genomic model													Intergated clinico-genomic model
				Calibration_Slope (CS）		C_index (95%CI) Bootstrap=1000	Time_Dependent_ROC			Kaplan_Meier_estimated_survival						Risk_Score_Formula	Calibration_Slope		C_index (95%CI) Bootstrap=1000	Time_Dependent_ROC			Kaplan_Meier_estimated_survival						Risk_Score_Formula
				CS (95%CI)	Wald_Test_P_value		AUC_1yr	AUC_3yr	AUC_5yr	HR_1yr (95%CI)	Log_Rank_P_value_1yr	HR_3yr (95%CI)	Log_Rank_P_value_3yr	HR_5yr (95%CI)	Log_Rank_P_value_5yr		Calibration_Slope (95%CI)	Wald_Test_P_value		AUC_1yr	AUC_3yr	AUC_5yr	HR_1yr (95%CI)	Log_Rank_P_value_1yr	HR_3yr (95%CI)	Log_Rank_P_value_3yr	HR_5yr (95%CI)	Log_Rank_P_value_5yr
BLCA	✔	IMPDH1 PDE7B	Univariate Cox (P＜0.2) + LASSO with 10-fold CV (lambda.min) + Multivariate Cox	2.718 (1.114-6.635)	0.0281	0.567 (0.522-0.617)	0.613 (0.545-0.685)	0.539 (0.468-0.612)	0.549 (0.454-0.643)	1.93 (1.2-3.11)	0.007	1.41 (1.03-1.94)	0.032	1.35 (0.99-1.83)	0.055	Risk Score = 0.133 * gene_IMPDH1 + -0.0491 * gene_PDE7B	2.718 (1.970-3.751)	1.15241e-09	0.658 (0.618-0.704)	0.707 (0.645-0.768)	0.651 (0.574-0.728)	0.670 (0.577-0.761)	3.3 (1.96-5.55)	<0.001	2.36 (1.69-3.28)	<0.001	2.42 (1.76-3.34)	<0.001	Risk Score = 0.8562 * risk_score_gene + 0.0299 * age + 0.7467 * stage + 0.381 * race black or african american + 0.1053 * race unknow + 0.0295 * race white
BLCA		IMPDH1	Univariate Cox (P＜0.2) + LASSO with 10-fold CV (lambda.min) + Stepwise Cox (AIC)	2.718 (0.978-7.552)	0.0551	0.562 (0.492-0.610)	0.603 (0.526-0.676)	0.554 (0.484-0.629)	0.551 (0.454-0.644)	1.44 (0.91-2.28)	0.124	1.27 (0.93-1.74)	0.138	1.29 (0.95-1.75)	0.102	Risk Score = 0.1446 * gene_IMPDH1	2.718 (1.976-3.740)	8.0055e-10	0.657 (0.620-0.704)	0.704 (0.641-0.764)	0.657 (0.583-0.733)	0.669 (0.580-0.757)	3.07 (1.84-5.13)	<0.001	2.35 (1.69-3.27)	<0.001	2.35 (1.7-3.23)	<0.001	Risk Score = 0.8747 * risk_score_gene + 0.0295 * age + 0.7668 * stage + 0.3717 * race black or african american + 0.081 * race unknow + 0.032 * race white + -0.1539 * gender Male
BRCA	✔	PAICS TXN	Univariate Cox (P＜0.2) + LASSO with 10-fold CV (lambda.min) + Multivariate Cox	2.718 (1.383-5.342)	0.00371685	0.548 (0.491-0.621)	0.527 (0.389-0.650)	0.580 (0.509-0.647)	0.566 (0.500-0.634)	0.66 (0.27-1.62)	0.369	1.26 (0.78-2.04)	0.339	1.26 (0.84-1.89)	0.268	Risk Score = 0.2478 * gene_PAICS + 0.1111 * gene_TXN	2.718 (2.155-3.429)	3.10135e-17	0.740 (0.702-0.790)	0.849 (0.770-0.913)	0.748 (0.689-0.812)	0.703 (0.639-0.768)	19.81 (2.65-148.01)	0.004	4.05 (2.28-7.19)	<0.001	3.18 (2.02-5)	<0.001	Risk Score = 1.012 * risk_score_gene + 0.0367 * age + 1.0457 * stage + 0.0193 * race black or african american + -0.3684 * race unknow + -0.1394 * race white + -0.7625 * gender Male
BRCA		PAICS	Univariate Cox (P＜0.2) + LASSO with 10-fold CV (lambda.min) + Stepwise Cox (AIC/BIC)	2.718 (1.340-5.515)	0.00560184	0.533 (0.474-0.594)	0.481 (0.347-0.610)	0.564 (0.489-0.634)	0.554 (0.486-0.619)	0.98 (0.41-2.36)	0.966	1.37 (0.85-2.23)	0.198	1.31 (0.87-1.98)	0.191	Risk Score = 0.3007 * gene_PAICS	2.718 (2.153-3.432)	4.39799e-17	0.739 (0.700-0.788)	0.841 (0.763-0.908)	0.748 (0.689-0.811)	0.703 (0.638-0.768)	19.67 (2.63-146.94)	0.004	3.71 (2.12-6.49)	<0.001	2.99 (1.91-4.68)	<0.001	Risk Score = 1.0126 * risk_score_gene + 0.0365 * age + 1.0533 * stage + 0.0303 * race black or african american + -0.4236 * race unknow + -0.1795 * race white + -0.7789 * gender Male
CESC	✔	GART HK2	Univariate Cox (P＜0.2) + LASSO with 10-fold CV (lambda.min) + Multivariate Cox	2.718 (1.129-6.544	0.0256766	0.625 (0.532-0.736)	0.634 (0.438-0.825)	0.676 (0.512-0.804)	0.728 (0.543-0.864)	2.39 (0.46-12.32)	0.298	2.73 (1-7.47)	0.05	3.13 (1.16-8.44)	0.024	Risk Score = 0.4018 * gene_GART + 0.3136 * gene_HK2	2.718 (1.935-3.819)	8.15801e-09	0.793 (0.734-0.902)	0.911 (0.783-0.998)	0.809 (0.696-0.920)	0.806 (0.642-0.939)	NA	0.998	4.91 (1.65-14.62)	0.004	3.48 (1.36-8.87)	0.009	Risk Score = 1.0918 * risk_score_gene + 0.0301 * age + 1.7039 * stage + -3.8464 * race asian + -6.0833 * race black or african american + -4.9102 * race unknow + -4.4431 * race white
CESC		HK2	Univariate Cox (P＜0.2) + LASSO with 10-fold CV (lambda.min) + Stepwise Cox (AIC)	2.718 (0.992-7.449)	0.05186	0.619 (0.502-0.725)	0.563 (0.366-0.740)	0.655 (0.515-0.780)	0.683 (0.500-0.828)	2.59 (0.5-13.33)	0.256	2.46 (0.96-6.35)	0.062	2.83 (1.12-7.18)	0.029	Risk Score = 0.3767 * gene_HK2	2.718 (1.917-3.854)	1.99669e-08	0.793 (0.731-0.896)	0.906 (0.802-0.991)	0.802 (0.688-0.911)	0.790 (0.630-0.923)	NA	0.998	7.19 (2.11-24.45)	0.002	4.66 (1.72-12.64)	0.003	Risk Score = 0.9184 * risk_score_gene + 0.0289 * age + 1.5563 * stage + -3.968 * race asian + -6.0458 * race black or african american + -4.9543 * race unknow + -4.479 * race white
CHOL	✔	RRM2	Univariate Cox (P＜0.3) + Multivariate Cox	2.720 (0.466-15.869)	0.266156	0.609 (0.480-0.757)	0.752 (0.530-0.937)	0.610 (0.362-0.858)	0.072 (0.000-0.259)	2.79 (0.54-14.4)	0.221	1.5 (0.53-4.24)	0.441	1.48 (0.56-3.89)	0.432	Risk Score = 0.2673 * gene_RRM2	2.717 (1.046-7.061)	0.0402001	0.633 (0.580-0.842)	0.800 (0.585-0.974)	0.693 (0.442-0.877)	0.514 (0.276-0.800)	6.7 (0.81-55.76)	0.078	1.83 (0.65-5.17)	0.251	1.88 (0.71-4.97)	0.204	Risk Score = 1.1981 * risk_score_gene + 0.0117 * age + 0.8274 * stage + -0.1113 * race black or african american + -1.0097 * race white + 0.2459 * gender Male
COAD	✔	ADA	Univariate Cox (P＜0.3) + Multivariate Cox	2.718 (0.549-13.466)	0.22063	0.557 (0.479-0.626)	0.549 (0.452-0.642)	0.540 (0.451-0.627)	0.469 (0.352-0.584)	1.68 (0.94-2.98)	0.079	1.73 (1.09-2.75)	0.02	1.7 (1.11-2.62)	0.015	Risk Score = 0.1113 * gene_ADA	2.719 (2.022-3.657)	3.69834e-11	0.715 (0.672-0.776)	0.724 (0.651-0.794)	0.780 (0.708-0.843)	0.745 (0.644-0.844)	3.9 (1.99-7.63)	<0.001	5.35 (3-9.56)	<0.001	4.55 (2.74-7.56)	<0.001	Risk Score = 0.7243 * risk_score_gene + 0.0357 * age + 1.2543 * stage + 13.1236 * race asian + 12.5608 * race black or african american + 12.4635 * race unknow + 12.3975 * race white + -0.0956 * gender Male
ESCA	✔	HPRT1 NT5C3A	Univariate Cox (P＜0.2) + Multivariate Cox	2.719 (1.100-6.721)	0.0303303	0.633 (0.558-0.713)	0.668 (0.550-0.785)	0.629 (0.468-0.804)	0.588 (0.257-0.980)	3.48 (1.49-8.16)	0.004	2.46 (1.4-4.29)	0.002	2.32 (1.38-3.9)	0.002	Risk Score = 0.2613 * gene_HPRT1 + 0.2224 * gene_NT5C3A	2.718 (1.862-3.968)	2.21212e-07	0.689 (0.636-0.776)	0.674 (0.549-0.784)	0.795 (0.668-0.904)	0.812 (0.597-0.971)	3.11 (1.37-7.02)	0.006	3.73 (2.03-6.85)	<0.001	3.61 (2.06-6.31)	<0.001	Risk Score = 0.7812 * risk_score_gene + 0.007 * age + 0.9651 * stage + 0.6402 * race black or african american + 0.6733 * race unknow + -0.0117 * race white + 0.4156 * gender Male
ESCA		NT5C3A	Univariate Cox (P＜0.2) + Stepwise Cox (AIC)	2.718 (0.911-8.114)	0.0730875	0.601 (0.503-0.686)	0.633 (0.505-0.756)	0.576 (0.415-0.736)	0.455 (0.247-0.750)	1.68 (0.79-3.55)	0.176	1.44 (0.83-2.49)	0.19	1.34 (0.8-2.24)	0.265	Risk Score = 0.2724 * gene_NT5C3A	2.718 (1.834-4.029)	6.35877e-07	0.674 (0.621-0.760)	0.648 (0.525-0.772)	0.796 (0.661-0.899)	0.803 (0.643-0.947)	2.63 (1.2-5.78)	0.016	3.48 (1.89-6.38)	<0.001	3.39 (1.94-5.94)	<0.001	Risk Score = 0.5763 * risk_score_gene + 0.005 * age + 0.9988 * stage + 0.5502 * race black or african american + 0.5846 * race unknow + -0.0533 * race white + 0.4808 * gender Male
HNSC	✔	ADA ADCY5 HPRT1 PKM	Univariate Cox (P＜0.2) + LASSO with 10-fold CV (lambda.min) + Multivariate Cox	2.718 (1.921-3.847)	1.65419e-08	0.623 (0.586-0.670)	0.644 (0.576-0.706)	0.656 (0.590-0.730)	0.646 (0.562-0.738)	2.56 (1.56-4.22)	<0.001	2.57 (1.84-3.6)	<0.001	2.35 (1.71-3.22)	<0.001	Risk Score = 0.0772 * gene_ADA + -0.067 * gene_ADCY5 + 0.4992 * gene_HPRT1 + 0.1175 * gene_PKM	2.718 (2.093-3.53)	6.46774e-14	0.663 (0.629-0.706)	0.696 (0.632-0.768)	0.705 (0.648-0.767)	0.678 (0.597-0.758)	3.84 (2.23-6.6)	<0.001	3.2 (2.26-4.52)	<0.001	2.81 (2.03-3.88)	<0.001	Risk Score = 1.0333 * risk_score_gene + 0.0249 * age + 0.6851 * stage + 0.2134 * race asian + 0.0203 * race black or african american + -0.03 * race unknow + -0.2747 * race white
HNSC		ADCY5 HPRT1	Univariate Cox (P＜0.2) + LASSO with 10-fold CV (lambda.min) + Stepwise Cox (AIC)	2.718 (1.898-3.893)	4.84357e-08	0.622 (0.578-0.666)	0.640 (0.572-0.706)	0.657 (0.587-0.723)	0.652 (0.567-0.745)	2.55 (1.55-4.2)	<0.001	2.47 (1.77-3.44)	<0.001	2.29 (1.67-3.13)	<0.001	Risk Score = -0.0794 * gene_ADCY5 + 0.5648 * gene_HPRT1	2.718 (2.086-3.542)	1.33042e-13	0.662 (0.626-0.708)	0.686 (0.620-0.757)	0.708 (0.647-0.768)	0.675 (0.592-0.756)	3.56 (2.09-6.05)	<0.001	2.84 (2.02-3.98)	<0.001	2.6 (1.89-3.57)	<0.001	Risk Score = 1.0171 * risk_score_gene + 0.0228 * age + 0.6891 * stage + 0.0538 * race asian + -0.0797 * race black or african american + -0.1655 * race unknow + -0.3881 * race white + -0.1733 * gender Male
HNSC		HPRT1	Univariate Cox (P＜0.2) + LASSO with 10-fold CV (lambda.min) + Stepwise Cox (BIC)	2.718 (1.839-4.017)	5.21366e-07	0.605 (0.560-0.646)	0.602 (0.534-0.670)	0.648 (0.581-0.718)	0.671 (0.587-0.761)	1.88 (1.17-3.02)	0.009	2.26 (1.63-3.15)	<0.001	2.16 (1.58-2.96)	<0.001	Risk Score = 0.5425 * gene_HPRT1	2.718 (2.057-3.593)	2.10231e-12	0.651 (0.616-0.698)	0.664 (0.596-0.737)	0.701 (0.640-0.758)	0.676 (0.596-0.752)	3.06 (1.83-5.11)	<0.001	2.81 (2-3.94)	<0.001	2.53 (1.84-3.48)	<0.001	Risk Score = 0.9935 * risk_score_gene + 0.0226 * age + 0.6443 * stage + 0.1311 * race asian + -0.0745 * race black or african american + -0.1931 * race unknow + -0.3708 * race white + -0.2123 * gender Male
KIRC	✔	ACADM IMPDH1 NME1 PDE7B RRM2 TYMP	Univariate Cox (P＜0.2) + LASSO with 10-fold CV (lambda.min) + Multivariate Cox	2.718 (2.186-3.380)	2.34627e-19	0.682 (0.645-0.728)	0.754 (0.682-0.821)	0.694 (0.639-0.757)	0.717 (0.660-0.772)	5.62 (2.64-11.96)	<0.001	2.93 (1.92-4.45)	<0.001	3.09 (2.15-4.44)	<0.001	Risk Score = -0.3494 * gene_ACADM + 0.3832 * gene_IMPDH1 + 0.1091 * gene_NME1 + -0.0502 * gene_PDE7B + 0.1416 * gene_RRM2 + 0.0301 * gene_TYMP	2.718 (2.298-3.216)	2.02123e-31	0.770 (0.739-0.808)	0.863 (0.819-0.903)	0.801 (0.757-0.848)	0.779 (0.726-0.827)	NA	0.995	7.78 (4.44-13.63)	<0.001	6.04 (3.9-9.36)	<0.001	Risk Score = 0.8337 * risk_score_gene + 0.0278 * age + 1.0553 * stage + 1.5305 * race black or african american + 1.4599 * race unknow + 1.6592 * race white
KIRC		ACADM	Univariate Cox (P＜0.2) + LASSO with 10-fold CV (lambda.1se) + Multivariate Cox	2.718 (2.005-3.685)	1.18876e-10	0.653 (0.610-0.695)	0.689 (0.616-0.762)	0.683 (0.625-0.743)	0.689 (0.632-0.747)	3.67 (1.88-7.16)	<0.001	3.37 (2.18-5.21)	<0.001	3.25 (2.25-4.68)	<0.001	Risk Score = -0.3945 * gene_ACADM	2.718 (2.255-3.277)	9.35117e-26	0.756 (0.726-0.792)	0.841 (0.799-0.885)	0.796 (0.748-0.844)	0.758 (0.706-0.811)	16.7 (5.2-53.66)	<0.001	7.49 (4.28-13.13)	<0.001	5.06 (3.33-7.67)	<0.001	Risk Score = 0.8345 * risk_score_gene + 0.0282 * age + 1.2454 * stage + 0.8134 * race black or african american + 0.8334 * race unknow + 0.9719 * race white
KIRC		ACADM IMPDH1 RRM2	Univariate Cox (P＜0.2) + LASSO with 10-fold CV (lambda.min) + Stepwise Cox (AIC/BIC)	2.718 (2.177-3.395)	1.14266e-18	0.676 (0.630-0.722)	0.744 (0.666-0.815)	0.681 (0.624-0.749)	0.715 (0.657-0.771)	4.98 (2.42-10.24)	<0.001	2.7 (1.79-4.08)	<0.001	2.83 (1.98-4.03)	<0.001	Risk Score = -0.4062 * gene_ACADM + 0.4152 * gene_IMPDH1 + 0.1847 * gene_RRM2	2.718 (2.297-3.217)	2.36796e-31	0.769 (0.738-0.808)	0.860 (0.815-0.900)	0.800 (0.756-0.846)	0.781 (0.732-0.831)	54.8 (7.57-396.84)	<0.001	8.02 (4.58-14.06)	<0.001	6.22 (4.02-9.63)	<0.001	Risk Score = 0.8439 * risk_score_gene + 0.0276 * age + 1.0588 * stage + 1.6255 * race black or african american + 1.5385 * race unknow + 1.7325 * race white + -0.0979 * gender Male
LIHC	✔	ADA ATIC IMPDH1 PDE2A PPAT RRM2 TXN UCK2	Univariate Cox (P＜0.2) + LASSO with 10-fold CV (lambda.min) + Multivariate Cox	2.718 (2.073-3.565)	4.94935e-13	0.716 (0.671-0.773)	0.806 (0.740-0.862)	0.737 (0.666-0.807)	0.721 (0.623-0.814)	5.84 (2.96-11.56)	<0.001	3.47 (2.24-5.39)	<0.001	2.86 (1.93-4.23)	<0.001	Risk Score = 0.0327 * gene_ADA + 0.1165 * gene_ATIC + 0.1516 * gene_IMPDH1 + -0.1323 * gene_PDE2A + 0.2624 * gene_PPAT + 0.0328 * gene_RRM2 + 0.1176 * gene_TXN + 0.1242 * gene_UCK2	2.720 (2.160-3.424)	1.61742e-17	0.730 (0.687-0.785)	0.818 (0.750-0.872)	0.767 (0.692-0.829)	0.763 (0.674-0.853)	4.48 (2.37-8.47)	<0.001	3.3 (2.13-5.12)	<0.001	3.02 (2.02-4.5)	<0.001	Risk Score = 0.9072 * risk_score_gene + 0.0134 * age + 0.7708 * stage + 13.2827 * race asian + 13.8283 * race black or african american + 14.1019 * race unknow + 13.2389 * race white
LIHC		UCK2	Univariate Cox (P＜0.2) + LASSO with 10-fold CV (lambda.1se) + Multivariate Cox	2.718 (1.937-3.816)	7.47405e-09	0.684 (0.631-0.735)	0.760 (0.685-0.826)	0.718 (0.639-0.790)	0.707 (0.607-0.813)	4.15 (2.24-7.7)	<0.001	3.22 (2.09-4.97)	<0.001	2.8 (1.89-4.14)	<0.001	Risk Score = 0.5457 * gene_UCK2	2.720 (2.102-3.520)	2.84497e-14	0.709 (0.665-0.764)	0.785 (0.712-0.852)	0.753 (0.673-0.815)	0.746 (0.652-0.842)	4.28 (2.26-8.07)	<0.001	3.48 (2.22-5.44)	<0.001	3.14 (2.09-4.72)	<0.001	Risk Score = 0.9501 * risk_score_gene + 0.0129 * age + 0.899 * stage + 13.6603 * race asian + 14.4922 * race black or african american + 14.2942 * race unknow + 13.5904 * race white
LIHC		IMPDH1 PDE2A PPAT TXN	Univariate Cox (P＜0.2) + LASSO with 10-fold CV (lambda.min) + Stepwise Cox (AIC)	2.718 (2.069-3.572)	7.01206e-13	0.713 (0.666-0.765)	0.804 (0.736-0.858)	0.734 (0.664-0.801)	0.719 (0.621-0.817)	9.07 (4.11-19.99)	<0.001	3.97 (2.53-6.22)	<0.001	3.21 (2.16-4.78)	<0.001	Risk Score = 0.2219 * gene_IMPDH1 + -0.1601 * gene_PDE2A + 0.3859 * gene_PPAT + 0.1718 * gene_TXN	2.720 (2.179-3.393)	8.1766e-19	0.737 (0.694-0.792)	0.826 (0.757-0.877)	0.773 (0.698-0.832)	0.753 (0.666-0.840)	4.97 (2.58-9.59)	<0.001	3.57 (2.28-5.59)	<0.001	3.35 (2.23-5.06)	<0.001	Risk Score = 0.8956 * risk_score_gene + 0.0121 * age + 0.7561 * stage + 13.1578 * race asian + 13.7421 * race black or african american + 14.0593 * race unknow + 13.1147 * race white + -0.1742 * gender Male
LIHC		IMPDH1 PDE2A PPAT	Univariate Cox (P＜0.2) + LASSO with 10-fold CV (lambda.min) + Stepwise Cox (BIC)	2.718 (2.051-3.603)	3.56352e-12	0.707 (0.658-0.758)	0.799 (0.730-0.855)	0.729 (0.657-0.800)	0.712 (0.619-0.813)	6.7 (3.29-13.65)	<0.001	3.35 (2.17-5.17)	<0.001	2.79 (1.89-4.12)	<0.001	Risk Score = 0.2351 * gene_IMPDH1 + -0.176 * gene_PDE2A + 0.4043 * gene_PPAT	2.720 (2.151-3.439)	6.25115e-17	0.727 (0.683-0.780)	0.820 (0.754-0.876)	0.759 (0.689-0.825)	0.753 (0.662-0.844)	6.68 (3.28-13.61)	<0.001	3.63 (2.33-5.65)	<0.001	3.51 (2.34-5.28)	<0.001	Risk Score = 0.883 * risk_score_gene + 0.0145 * age + 0.7636 * stage + 13.1884 * race asian + 13.7648 * race black or african american + 14.0503 * race unknow + 13.0522 * race white + -0.0985 * gender Male
LUAD	✔	PDE5A RRM2 TXN UCK2	Univariate Cox (P＜0.2) + LASSO with 10-fold CV (lambda.min) + Multivariate Cox	2.719 (1.797-4.114)	2.1987e-06	0.619 (0.576-0.672)	0.653 (0.580-0.727)	0.651 (0.587-0.716)	0.609 (0.526-0.694)	2.28 (1.31-3.99)	0.004	2.49 (1.74-3.57)	<0.001	1.9 (1.4-2.59)	<0.001	Risk Score = -0.1749 * gene_PDE5A + 0.1731 * gene_RRM2 + 0.0595 * gene_TXN + 0.0544 * gene_UCK2	2.719 (2.126-3.479)	1.70558e-15	0.672 (0.633-0.722)	0.695 (0.617-0.762)	0.720 (0.660-0.783)	0.701 (0.621-0.771)	2.93 (1.63-5.29)	<0.001	3.35 (2.29-4.92)	<0.001	2.61 (1.9-3.59)	<0.001	Risk Score = 1.0809 * risk_score_gene + 0.0146 * age + 0.8964 * stage + 12.3025 * race asian + 12.9908 * race black or african american + 13.034 * race unknow + 13.2488 * race white
LUAD		PDE5A RRM2	Univariate Cox (P＜0.2) + LASSO with 10-fold CV (lambda.min) + Stepwise Cox (AIC)	2.719 (1.764-4.192)	5.91727e-06	0.611 (0.568-0.661)	0.647 (0.576-0.717)	0.637 (0.572-0.703)	0.622 (0.531-0.706)	2.29 (1.31-4)	0.004	2.43 (1.69-3.48)	<0.001	2.04 (1.49-2.78)	<0.001	Risk Score = -0.1692 * gene_PDE5A + 0.2177 * gene_RRM2	2.719 (2.115-3.497)	6.44083e-15	0.669 (0.630-0.721)	0.695 (0.618-0.762)	0.713 (0.650-0.775)	0.712 (0.635-0.780)	3.25 (1.78-5.94)	<0.001	3.17 (2.18-4.63)	<0.001	2.53 (1.85-3.48)	<0.001	Risk Score = 1.0598 * risk_score_gene + 0.0154 * age + 0.8723 * stage + 12.2699 * race asian + 12.9747 * race black or african american + 13.0125 * race unknow + 13.2201 * race white + 0.0584 * gender Male
LUAD		RRM2	Univariate Cox (P＜0.2) + LASSO with 10-fold CV (lambda.min) + Stepwise Cox (BIC)	2.718 (1.667-4.432)	6.10101e-05	0.599 (0.551-0.643)	0.612 (0.533-0.686)	0.635 (0.570-0.706)	0.629 (0.541-0.712)	1.63 (0.96-2.78)	0.073	2.13 (1.49-3.03)	<0.001	1.76 (1.3-2.39)	<0.001	Risk Score = 0.2061 * gene_RRM2	2.719 (2.088-3.542)	1.2023e-13	0.661 (0.622-0.714)	0.669 (0.591-0.739)	0.712 (0.644-0.775)	0.713 (0.631-0.784)	2.09 (1.2-3.63)	0.009	2.74 (1.9-3.96)	<0.001	2.39 (1.74-3.28)	<0.001	Risk Score = 0.959 * risk_score_gene + 0.0133 * age + 0.8897 * stage + 12.4744 * race asian + 13.1002 * race black or african american + 13.1373 * race unknow + 13.2776 * race white + 0.054 * gender Male
LUSC	✔	ADA PKM	Univariate Cox (P＜0.2) + Multivariate Cox	2.718 (0.860-8.592)	0.0885346	0.532 (0.497-0.577)	0.559 (0.486-0.629)	0.529 (0.457-0.591)	0.552 (0.475-0.623)	1.47 (0.92-2.34)	0.105	1.2 (0.88-1.64)	0.255	1.23 (0.92-1.65)	0.164	Risk Score = 0.0534 * gene_ADA + 0.1086 * gene_PKM	2.718 (1.842-4.011)	4.70538e-07	0.607 (0.567-0.655)	0.628 (0.553-0.700)	0.634 (0.564-0.696)	0.605 (0.524-0.679)	1.76 (1.09-2.83)	0.02	1.76 (1.27-2.43)	<0.001	1.72 (1.28-2.32)	<0.001	Risk Score = 0.9639 * risk_score_gene + 0.0176 * age + 0.5152 * stage + -0.1557 * race black or african american + -0.9351 * race unknow + -0.6176 * race white + 0.2857 * gender Male
LUSC		PKM	Univariate Cox (P＜0.2) + LASSO with 10-fold CV (lambda.min/1se) + Multivariate Cox	2.718 (0.684-10.753)	0.154078	0.524 (0.490-0.567)	0.535 (0.460-0.612)	0.530 (0.456-0.594)	0.517 (0.440-0.592)	1.05 (0.66-1.66)	0.843	0.99 (0.72-1.35)	0.941	0.99 (0.74-1.33)	0.959	Risk Score = 0.1332 * gene_PKM	2.718 (1.777-4.158)	4.01063e-06	0.590 (0.550-0.642)	0.609 (0.535-0.677)	0.602 (0.531-0.666)	0.578 (0.502-0.650)	1.46 (0.91-2.32)	0.114	1.51 (1.1-2.08)	0.011	1.38 (1.03-1.85)	0.033	Risk Score = 0.9228 * risk_score_gene + 0.0163 * age + 0.5009 * stage + -0.1861 * race black or african american + -0.8997 * race unknow + -0.5973 * race white
PAAD	✔	HKDC1 RRM2	Univariate Cox (P＜0.2) + LASSO with 10-fold CV (lambda.min) + Multivariate Cox/Stepwise Cox (AIC/BIC)	2.721 (1.612-4.593)	0.000179175	0.610 (0.549-0.672)	0.605 (0.502-0.700)	0.661 (0.502-0.799)	0.688 (0.426-0.933)	1.39 (0.75-2.58)	0.301	1.45 (0.95-2.22)	0.089	1.38 (0.91-2.1)	0.129	Risk Score = 0.1034 * gene_HKDC1 + 0.2761 * gene_RRM2	2.720 (1.731-4.275)	1.43005e-05	0.623 (0.566-0.700)	0.607 (0.502-0.702)	0.749 (0.611-0.869)	0.734 (0.464-0.988)	1.84 (0.97-3.47)	0.061	1.89 (1.22-2.93)	0.004	1.77 (1.15-2.7)	0.009	Risk Score = 0.9836 * risk_score_gene + 0.0206 * age + -0.3658 * stage + 0.3228 * race black or african american + 0.636 * race unknow + 0.3715 * race white
PAAD		RRM2	Univariate Cox (P＜0.2) + LASSO with 10-fold CV (lambda.1se) + Multivariate Cox	2.718 (1.604-4.607)	0.000202885	0.607 (0.545-0.669)	0.609 (0.501-0.705)	0.695 (0.536-0.825)	0.704 (0.453-0.954)	1.35 (0.72-2.5)	0.349	1.4 (0.91-2.15)	0.122	1.32 (0.87-2.01)	0.187	Risk Score = 0.3534 * gene_RRM2	2.718 (1.725-4.283)	1.61899e-05	0.624 (0.564-0.697)	0.617 (0.514-0.719)	0.759 (0.618-0.878)	0.741 (0.479-0.948)	2.33 (1.2-4.49)	0.012	2.3 (1.48-3.58)	<0.001	2.17 (1.41-3.35)	<0.001	Risk Score = 0.9541 * risk_score_gene + 0.0199 * age + -0.3563 * stage + 0.3912 * race black or african american + 0.6703 * race unknow + 0.361 * race white
PRAD	✔	APRT	Univariate Cox (P＜0.2) + LASSO with 10-fold CV (lambda.min) + Multivariate Cox	2.718 (0.787-9.389)	0.113834	0.607 (0.545-0.669)	0.609 (0.501-0.705)	0.695 (0.536-0.825)	0.704 (0.453-0.954)	1.35 (0.72-2.5)	0.349	1.4 (0.91-2.15)	0.122	1.32 (0.87-2.01)	0.187	Risk Score = 1.0725 * gene_APRT	NA	NA	NA	NA	NA	NA	NA	NA	NA	NA	NA	NA	NA
READ	✔	APRT PAICS	Univariate Cox (P＜0.2) + LASSO with 10-fold CV (lambda.min) + Multivariate Cox	2.718 (0.884-8.354)	0.081	0.723 (0.602-0.951)	NA	0.708 (0.541-0.855)	0.805 (0.542-0.956)	NA	NA	NA	0.999	NA	0.999	Risk Score = 0.9025 * gene_APRT + 0.5665 * gene_PAICS	NA	NA	NA	NA	NA	NA	NA	NA	NA	NA	NA	NA	NA
READ		APRT	Univariate Cox (P＜0.2) + LASSO with 10-fold CV (lambda.min) + Stepwise Cox (AIC)	2.718 (0.787-9.389)	0.113834	0.714 (0.596-0.880)	NA	0.689 (0.551-0.809)	0.764 (0.536-0.911)	NA	NA	NA	0.999	NA	0.999	Risk Score = 1.0725 * gene_APRT	NA	NA	NA	NA	NA	NA	NA	NA	NA	NA	NA	NA	NA
STAD	✔	APRT PAICS	Univariate Cox (P＜0.6) + Multivariate Cox	2.718 (0.092-80.444)	0.562874	0.493 (0.470-0.562)	0.477 (0.404-0.553)	0.471 (0.373-0.576)	0.465 (0.310-0.623)	0.86 (0.54-1.36)	0.521	0.92 (0.66-1.3)	0.644	0.95 (0.68-1.33)	0.766	Risk Score = 0.0537 * gene_IMPDH1	2.719 (1.834-4.030)	6.30162e-07	0.624 (0.591-0.686)	0.620 (0.542-0.693)	0.589 (0.479-0.691)	0.614 (0.439-0.776)	2.02 (1.25-3.27)	0.004	2.05 (1.44-2.92)	<0.001	2.04 (1.44-2.88)	<0.001	Risk Score = -0.1175 * risk_score_gene + 0.0228 * age + 0.7147 * stage + 0.347 * race black or african american + 0.273 * race unknow + 0.2355 * race white + 0.2354 * gender Male
THCA	✔	IMPDH1	Univariate Cox (P＜0.2) + Multivariate Cox	2.719 (0.715-10.341)	0.142079	0.600 (0.460-0.794)	0.716 (0.144-1.000)	0.546 (0.371-0.749)	0.480 (0.311-0.655)	1.97 (0.18-21.71)	0.58	1.27 (0.34-4.74)	0.72	1.07 (0.38-3.06)	0.897	Risk Score = 0.6769 * gene_IMPDH1	2.719 (1.931-3.829)	1.01956e-08	0.945 (0.910-0.981)	0.947 (0.892-0.999)	0.859 (0.781-0.930)	0.863 (0.783-0.925)	NA	0.999	NA	0.998	NA	0.998	Risk Score = 0.4956 * risk_score_gene + 0.1082 * age + -0.0223 * stage + 0.376 * race asian + 18.9633 * race black or african american + 0.1647 * race unknow + 0 * race white + -0.0445 * gender Male
UCEC		ADA GMPS PDE7A PPAT UCK2	Univariate Cox (P＜0.2) + LASSO with 10-fold CV (lambda.min) + Multivariate Cox	2.718 (1.763-4.190)	5.9e-06	0.664 (0.600-0.731)	0.650 (0.530-0.760)	0.697 (0.625-0.766)	0.718 (0.644-0.787)	4 (1.49-10.72)	0.006	3.65 (2.14-6.25)	<0.001	3.71 (2.27-6.05)	<0.001	Risk Score = 0.2979 * gene_ADA + 0.0672 * gene_GMPS + 0.0612 * gene_PDE7A + 0.0156 * gene_PPAT + 0.1314 * gene_UCK2	2.718 (2.147-3.442)	9.81223e-17	0.764 (0.719-0.822)	0.747 (0.642-0.850)	0.784 (0.723-0.848)	0.795 (0.732-0.859)	4.02 (1.5-10.76)	0.006	4 (2.29-6.98)	<0.001	4.08 (2.44-6.81)	<0.001	Risk Score = 0.5873 * risk_score_gene + 0.0373 * age + 1.2912 * stage + -1.2464 * race asian + -0.9356 * race black or african american + -0.2212 * race native hawaiian or other pacific islander + -1.8717 * race unknow + -0.7337 * race white
UCEC	✔	ADA UCK2	Univariate Cox (P＜0.2) + LASSO with 10-fold CV (lambda.min) + Stepwise Cox (AIC)	2.718 (1.746-4.232)	9.588e-06	0.667 (0.601-0.728)	0.672 (0.557-0.777)	0.692 (0.617-0.765)	0.693 (0.619-0.765)	4.05 (1.51-10.85)	0.005	3.28 (1.94-5.55)	<0.001	3.1 (1.93-5)	<0.001	Risk Score = 0.3327 * gene_ADA + 0.1929 * gene_UCK2	2.718 (2.144-3.447)	1.58889e-16	0.765 (0.721-0.822)	0.754 (0.651-0.853)	0.783 (0.723-0.847)	0.790 (0.726-0.855)	4.02 (1.5-10.78)	0.006	4.42 (2.5-7.82)	<0.001	4.15 (2.49-6.93)	<0.001	Risk Score = 0.5492 * risk_score_gene + 0.0378 * age + 1.2954 * stage + -1.2188 * race asian + -0.8917 * race black or african american + -0.2097 * race native hawaiian or other pacific islander + -1.8262 * race unknow + -0.7062 * race white
UCEC		ADA	Univariate Cox (P＜0.2) + LASSO with 10-fold CV (lambda.min) + Stepwise Cox (BIC)	2.718 (1.695-4.359)	3.33009e-05	0.663 (0.603-0.724)	0.675 (0.569-0.771)	0.680 (0.601-0.755)	0.680 (0.602-0.752)	3.12 (1.24-7.87)	0.016	2.96 (1.77-4.97)	<0.001	3.02 (1.87-4.86)	<0.001	Risk Score = 0.3801 * gene_ADA	2.718 (2.135-3.461)	5.0108e-16	0.761 (0.715-0.818)	0.755 (0.658-0.855)	0.775 (0.710-0.838)	0.779 (0.714-0.847)	4.01 (1.5-10.74)	0.006	4.05 (2.32-7.07)	<0.001	3.84 (2.32-6.36)	<0.001	Risk Score = 0.5059 * risk_score_gene + 0.0392 * age + 1.3089 * stage + -1.2175 * race asian + -0.8778 * race black or african american + -0.2399 * race native hawaiian or other pacific islander + -1.8151 * race unknow + -0.7047 * race white
